# Supplementary material for: An Integrated Analysis of Metabolome, Transcriptome, and Physiology Revealed the Molecular and Physiological Response of Citrus sinensis Roots to Prolonged Nitrogen Deficiency
Source: MDPI journal article supplement (doi:10.3390/plants12142680), 2023-07-18
Supplement: s1 [file s1]

## Tables S2, S4-5 and S10-21

**Table S2.** DAMs in RN0

| Index (formula)                                    | Compounds                              | VIP   | Log <sub>2</sub> (FC) | Class |
|----------------------------------------------------|----------------------------------------|-------|-----------------------|-------|
| <b>Amino acids and derivatives (AADs; Class I)</b> |                                        |       |                       |       |
| <i>AADs (Class II)</i>                             |                                        |       |                       |       |
| mws5035 (C15H22N2O3)                               | L-Leucyl-L-phenylalanine               | 1.316 | 14.291                | PM    |
| Zmdp002216 (C11H20N2O5)                            | L-γ-Glutamyl-L-leucine                 | 1.295 | 3.761                 | PM    |
| pme0010 (C3H7NO3)                                  | L-Serine                               | 1.290 | 2.086                 | PM    |
| pme0014 (C5H9NO4)                                  | L-Glutamic acid                        | 1.311 | 1.760                 | PM    |
| pme0181 (C7H11N3O2)                                | 3-Methyl-L-histidine                   | 1.224 | 1.669                 | PM    |
| pme3827 (C9H11NO4)                                 | 3,4-Dihydroxy-L-phenylalanine (L-Dopa) | 1.241 | 1.620                 | PM    |
| mws5037 (C9H18N2O3)                                | L-Alanyl-L-leucine                     | 1.308 | 1.530                 | PM    |
| pme1712 (C11H20N2O6)                               | L-Saccharopine                         | 1.280 | 1.369                 | PM    |
| pme1419 (C6H13NO2S)                                | L-Methionine methyl ester              | 1.304 | 1.292                 | PM    |
| mws1050 (C5H9NO4)                                  | O-Acetylserine                         | 1.095 | 1.086                 | PM    |
| pmb2857 (C11H19NO9)                                | L-Glutamic acid-O-glycoside            | 1.248 | 1.022                 | PM    |
| pme1987 (C3H7NO2)                                  | L-Alanine                              | 1.136 | -1.018                | PM    |
| pme0008 (C6H13N3O3)                                | L-Citrulline                           | 1.220 | -1.032                | PM    |
| pme2735 (C15H22N6O5S)                              | S-Adenosyl-L-methionine                | 1.181 | -1.048                | PM    |
| pme0021 (C9H11NO2)                                 | L-Phenylalanine                        | 1.268 | -1.064                | PM    |
| Hmsp000364 (C7H13NO2)                              | L-Cyclopentylglycine                   | 1.276 | -1.105                | PM    |
| pmb0464 (C16H27NO14)                               | L-Aspartic acid-O-diglucoside          | 1.268 | -1.107                | PM    |
| Rfmb318 (C7H14NO2+)                                | D-Proline betaine                      | 1.254 | -1.126                | PM    |
| mws0520 (C11H13NO4)                                | N-Acetyl-L-tyrosine                    | 1.138 | -1.156                | PM    |
| pme0075 (C7H11NO5)                                 | N-Acetyl-L-glutamic acid               | 1.291 | -1.296                | PM    |
| MWSmce584 (C8H11NO)                                | Tyramine                               | 1.233 | -1.403                | PM    |
| pme0170 (C8H16N4O3)                                | N-Acetyl-L-arginine                    | 1.247 | -1.520                | PM    |
| mws0582 (C11H19N3O6S)                              | S-(Methyl) glutathione                 | 1.197 | -1.523                | PM    |
| mws4134 (C20H32N6O12S2)                            | Oxidized glutathione (GSSG)            | 1.260 | -1.572                | PM    |
| pme0006 (C5H9NO2)                                  | L-Proline                              | 1.309 | -1.642                | PM    |
| pme2559 (C6H9NO5)                                  | N-Acetyl-L-Aspartic acid               | 1.271 | -1.648                | PM    |
| NK10251888 (C8H18N4O2)                             | NG,NG-Dimethyl-L-arginine              | 1.270 | -1.650                | PM    |
| Zmyn000155 (C7H14N2O3)                             | N-α-Acetyl-L-ornithine                 | 1.290 | -1.688                | PM    |
| pmb2561 (C7H13NO3S)                                | N-Acetyl-L-methionine                  | 1.279 | -1.750                | PM    |
| pme2743 (C10H11NO3)                                | N-Phenylacetyl glycine                 | 1.165 | -1.797                | PM    |
| Zmdn001564 (C14H18N2O5)                            | γ-Glutamylphenylalanine                | 1.237 | -1.820                | PM    |
| Rfmb319 (C6H11NO2)                                 | Pipecolic acid                         | 1.303 | -1.869                | PM    |
| pme0026 (C6H14N2O2)                                | L-Lysine                               | 1.283 | -1.935                | PM    |
| pme0193 (C5H10N2O3)                                | L-Glutamine                            | 1.285 | -1.949                | PM    |
| MWSmce119 (C6H14N4O2)                              | L-Arginine                             | 1.310 | -2.069                | PM    |
| ML10181668 (C6H11NO2)                              | Cycloleucine                           | 1.305 | -2.166                | PM    |
| Zmdp000376 (C5H11N3O)                              | 4-Guanidinobutanal                     | 1.303 | -2.175                | PM    |
| pme1002 (C8H11NO)                                  | L-Tyramine                             | 1.271 | -2.270                | PM    |
| pme2527 (C5H12N2O2)                                | L-Ornithine                            | 1.262 | -2.285                | PM    |
| Lmbp000123 (C6H13NO2S)                             | L-Homomethionine                       | 1.304 | -2.590                | PM    |
| pme3388 (C7H16N4O2)                                | Homoarginine                           | 1.302 | -2.875                | PM    |
| mws0254 (C6H9N3O2)                                 | L-Histidine                            | 1.303 | -3.006                | PM    |
| Zmjp000182 (C7H16N4O2)                             | N-Monomethyl-L-arginine                | 1.314 | -3.006                | PM    |
| mws1375 (C12H21N3O6)                               | Nicotianamine                          | 1.269 | -3.078                | PM    |
| Zmdp000292 (C7H16N4O2)                             | Arginine methyl ester                  | 1.312 | -3.320                | PM    |
| pme1086 (C10H17N3O6S)                              | Reduced glutathione (GSH)              | 1.280 | -5.022                | PM    |
| mws0340 (C6H8O4)                                   | 2,3-Dimethylsuccinic acid              | 1.314 | -10.003               | PM    |
| pme0109 (C10H13NO4)                                | Methyldopa                             | 1.315 | -11.731               | PM    |
| pme0195 (C3H7NO2S)                                 | L-Cysteine                             | 1.315 | -13.209               | PM    |

### Lipids

|                                              |                                                              |       |         |    |
|----------------------------------------------|--------------------------------------------------------------|-------|---------|----|
| <b>Free fatty acids</b>                      |                                                              |       |         |    |
| mws0361 (C16H30O2)                           | Cis-5,8,11,14,17-eicosapentaenoic acid                       | 1.316 | 12.143  | PM |
| mws0945 (C20H30O3)                           | Palmitoleic acid                                             | 1.315 | 12.014  | PM |
| mws0955 (C20H30O3)                           | 15-Oxo-5Z,8Z,11Z,13E-eicosatetraenoic acid                   | 1.316 | 11.880  | PM |
| mws0879 (C20H32O3)                           | 12-Oxo-5,8,10,14-eicosatetraenoic acid                       | 1.316 | 11.861  | PM |
| Zmpn003698 (C20H34O2)                        | 12S-Hydroxy-5Z,8Z,10E,14Z-eicosatetraenoic acid              | 1.316 | 11.825  | PM |
| Lmbn006210 (C20H34O2)                        | 11,14,17-Eicosatrienoic acid                                 | 1.314 | 10.528  | PM |
| mws0369 (C20H32O2)                           | Dihomo-gamma-linolenic acid; (8Z,11Z,14Z)-Icosatrienoic acid | 1.313 | 10.458  | PM |
| Lmcn009122 (C16H30O2)                        | Arachidonic acid                                             | 1.313 | 4.717   | PM |
| Zmyn004714 (C18H34O3)                        | (7Z)-Hexadecenoic acid                                       | 1.305 | 4.439   | PM |
| pmf0297 (C20H42O)                            | Ricinoleic acid                                              | 1.313 | 2.562   | PM |
| MWS1900 (C11H20O4)                           | 1-Eicosanol                                                  | 1.311 | 2.505   | PM |
| Lmbn004240 (C18H34O5)                        | Undecanedioic acid                                           | 1.309 | 2.207   | PM |
| mws0954 (C20H32O3)                           | 9,10-Dihydroxy-12,13-epoxyoctadecanoic acid                  | 1.181 | 1.986   | PM |
| pmb2787 (C18H30O3)                           | 5-Hydroxy-6,8,11,14-eicosatetraenoic acid                    | 1.280 | 1.948   | PM |
| Lmbn005487 (C18H34O4)                        | 9-Oxo-10E,12Z-octadecadienoic acid                           | 1.290 | -1.172  | PM |
| Lmqn008288 (C18H36O3)                        | 12,13-DHOME; (9Z)-12,13-Dihydroxyoctadec-9-enoic acid        | 1.295 | -1.200  | PM |
| Zmyn004548 (C18H28O3)                        | 3-Hydroxyoctadecanoic acid                                   | 1.279 | -1.240  | PM |
| Zmpn003368 (C18H30O3)                        | 12-Oxo-phytodienoic acid                                     | 1.240 | -1.274  | PM |
| Hmqp006023 (C20H36O3)                        | 13S-Hydroxy-9Z,11E,15Z-octadecatrienoic acid                 | 1.180 | -1.442  | PM |
| pmb1452 (C16H35NO2)                          | Ethyl 9-Hydroxy-10,12-octadecadienoic acid                   | 1.299 | -2.204  | PM |
|                                              | N-Lauryldiethanolamine                                       | 1.315 | -14.349 | PM |
| <b>Glycerol esters</b>                       |                                                              |       |         |    |
| pmb0296 (C21H40O4)                           | 1-Oleoyl-Sn-glycerol                                         | 1.007 | -2.018  | PM |
| Lmhp011562 (C21H36O4)                        | 1- $\alpha$ -Linolenoyl-glycerol                             | 1.219 | -1.807  | PM |
| Lmhp112042 (C21H38O4)                        | 1-Linoleoylglycerol                                          | 1.205 | -1.124  | PM |
| <b>Sphingolipids</b>                         |                                                              |       |         |    |
| pmp001264 (C16H35NO2)                        | Hexadecylsphingosine                                         | 1.315 | 16.508  | PM |
| <b>Lysophosphatidylcholine (LysoPC)</b>      |                                                              |       |         |    |
| Lmhp009890 (C28H52NO7P)                      | LysoPC 20:3                                                  | 1.295 | 9.695   | PM |
| pmc0960 (C28H50NO7P)                         | LysoPC 20:4                                                  | 1.291 | 8.328   | PM |
| pmp001270 (C24H48NO7P)                       | LysoPC 16:1                                                  | 1.311 | 6.747   | PM |
| Hmqp006235 (C26H46NO7P)                      | LysoPC 18:4                                                  | 1.212 | 5.185   | PM |
| pmb0863 (C24H46NO7P)                         | LysoPC 16:2(2n isomer)                                       | 1.179 | 4.073   | PM |
| Lmhp008833 (C24H48NO7P)                      | LysoPC 16:1(2n isomer)                                       | 1.259 | 3.591   | PM |
| pmb0854 (C26H48NO7P)                         | LysoPC 18:3                                                  | 1.174 | 3.442   | PM |
| Lmhp008718 (C25H48NO7P)                      | LysoPC 17:2                                                  | 1.142 | 3.354   | PM |
| pmb2260 (C23H46NO7P)                         | LysoPC 15:1                                                  | 1.127 | 3.277   | PM |
| pmd0130 (C22H46NO7P)                         | LysoPC 14:0                                                  | 1.169 | 3.214   | PM |
| Lmhp009590 (C25H50NO7P)                      | LysoPC 17:1                                                  | 1.047 | 3.118   | PM |
| pmd0132 (C24H50NO7P)                         | LysoPC 16:0(2n isomer)                                       | 1.086 | 2.786   | PM |
| pmd0136 (C26H54NO7P)                         | LysoPC 18:0(2n isomer)                                       | 1.028 | 2.731   | PM |
| Lmhp010515 (C25H52NO7P)                      | LysoPC 17:0(2n isomer)                                       | 1.039 | 2.268   | PM |
| pmp001251 (C26H50NO7P)                       | LysoPC 18:2(2n isomer)                                       | 1.103 | 1.702   | PM |
| pmd0143 (C28H58NO7P)                         | LysoPC 20:0                                                  | 1.226 | -1.050  | PM |
| pmb2406 (C25H52NO7P)                         | LysoPC 17:0                                                  | 1.244 | -1.357  | PM |
| <b>Lysophosphatidylethanolamine (LysoPE)</b> |                                                              |       |         |    |

|                                          |                                          |       |        |    |
|------------------------------------------|------------------------------------------|-------|--------|----|
| Lmhp008688 (C25H42NO7P)                  | LysoPE 20:5                              | 1.310 | 17.834 | PM |
| Lmhp010040 (C25H46NO7P)                  | LysoPE 20:3                              | 1.295 | 9.001  | PM |
| Lmhp009497 (C25H44NO7P)                  | LysoPE 20:4                              | 1.307 | 8.573  | PM |
| Lmhp009034 (C21H42NO7P)                  | LysoPE 16:1                              | 1.314 | 6.009  | PM |
| Lmhp008763 (C21H42NO7P)                  | LysoPE 16:1(2n isomer)                   | 1.228 | 4.962  | PM |
| Lmhp008273 (C20H40NO7P)                  | LysoPE 15:1(2n isomer)                   | 1.208 | 4.603  | PM |
| Lmhp008440 (C20H40NO7P)                  | LysoPE 15:1                              | 1.186 | 4.440  | PM |
| Lmhp008885 (C20H42NO7P)                  | LysoPE 15:0(2n isomer)                   | 1.124 | 2.560  | PM |
| pmb0864 (C19H40NO7P)                     | LysoPE 14:0                              | 1.226 | -1.023 | PM |
| Lmhp009187 (C20H42NO7P)                  | LysoPE 15:0                              | 1.210 | -1.696 | PM |
| <b>Phosphatidyl choline (PC)</b>         |                                          |       |        |    |
| mws0120 (C8H20NO6P)                      | Choline alfoscerate                      | 1.308 | 3.604  | PM |
| <b>Nucleotides and derivatives (NDs)</b> |                                          |       |        |    |
| <b>NDs</b>                               |                                          |       |        |    |
| mws0874 (C10H14N5O7P)                    | 3'-Adenylic acid                         | 1.315 | 11.189 | PM |
| pmb2507 (C5H11O7P)                       | 2-Deoxyribose-1-phosphate                | 1.288 | 4.256  | PM |
| pmb0998 (C10H14N5O8P)                    | Guanosine 5'-monophosphate               | 1.195 | 2.181  | PM |
| pmc0066 (C10H13N4O7P)                    | 2'-Deoxyinosine-5'-monophosphate         | 1.299 | 2.109  | PM |
| pmb0981 (C10H14N5O7P)                    | Adenosine 5'-monophosphate               | 1.252 | 2.090  | PM |
| mws0863 (C5H11O7P)                       | 2-Deoxyribose-5'-phosphate               | 1.260 | 1.108  | PM |
| MWS5083 (C17H21N4O9P)                    | Flavin single nucleotide (FMN)           | 1.187 | 1.075  | PM |
| pmc0274 (C6H6N4S)                        | 6-Methylmercaptapurine                   | 1.262 | -1.056 | PM |
| pme0264 (C10H14N2O5)                     | Thymidine                                | 1.149 | -1.080 | PM |
| pme1109 (C5H5N5O)                        | Guanine                                  | 1.297 | -1.234 | PM |
| mws1060 (C10H12N4O5)                     | 9-(Arabinosyl) hypoxanthine              | 1.224 | -1.286 | PM |
| ML10180524 (C9H13N3O5)                   | Cytarabine                               | 1.291 | -1.333 | PM |
| pme0040 (C5H5N5)                         | Adenine                                  | 1.295 | -1.404 | PM |
| pme1178 (C10H13N5O5)                     | Guanosine                                | 1.243 | -1.414 | PM |
| mws0668 (C10H12N4O6)                     | Xanthosine                               | 1.285 | -1.527 | PM |
| pme0256 (C5H4N4O2)                       | Xanthine                                 | 1.268 | -1.668 | PM |
| <b>Organic acids</b>                     |                                          |       |        |    |
| <b>Organic acids</b>                     |                                          |       |        |    |
| mws0567 (C5H11N3O2)                      | 4-Guanidinobutyric acid                  | 1.313 | 5.534  | PM |
| mws0671 (C4H9NO3)                        | L-Homoserine                             | 1.294 | 5.012  | PM |
| Zmtn001464 (C10H7NO4)                    | 4,8-Dihydroxyquinoline-2-carboxylic acid | 1.307 | 2.874  | PM |
| mws2125 (C3H5O6P)                        | Phosphoenolpyruvate                      | 1.289 | 2.249  | PM |
| pme0220 (C13H20O3)                       | Methyl jasmonate                         | 1.020 | 1.833  | PM |
| pme3186 (C3H7O6P)                        | DL-Glyceraldehyde-3-phosphate            | 1.298 | 1.504  | PM |
| Lmgn000224 (C5H6O5)                      | 2-Methyl-3-oxosuccinic acid              | 1.287 | 1.316  | PM |
| mws4177 (C8H9NO2)                        | Methyl anthranilate                      | 1.155 | 1.298  | PM |
| pme2380 (C5H6O5)                         | $\alpha$ -Ketoglutaric acid              | 1.283 | 1.177  | PM |
| Lmbn001467 (C7H13NO3)                    | 5-Acetamidopentanoic acid                | 1.260 | 1.154  | PM |
| Lmgn000219 (C4H6O3)                      | Succinic semialdehyde                    | 1.303 | 1.107  | PM |
| Lmbn001609 (C6H10O4)                     | 2-Acetyl-2-Hydroxybutanoic acid          | 1.200 | -1.142 | PM |
| pme1730 (C4H6O4)                         | D-Erythrulose                            | 1.035 | -1.183 | PM |
| mws0924 (C6H10O4)                        | 2-Methylglutaric acid                    | 1.227 | -1.222 | PM |
| mws0208 (C6H10O4)                        | Adipic acid                              | 1.259 | -1.272 | PM |
| mws0206 (C4H8O3)                         | 2-Hydroxybutyric acid                    | 1.245 | -1.379 | PM |
| pme0295 (C6H11NO3)                       | 4-Acetamidobutyric acid                  | 1.242 | -1.393 | PM |
| Zmpn000638 (C4H9N3O2)                    | 3-Guanidinopropionic acid                | 1.219 | -1.635 | PM |
| mws2628 (C5H11NO2)                       | N-Methyl-4-aminobutyric acid             | 1.230 | -1.790 | PM |
| mws0147 (C5H10O3)                        | $\beta$ -Hydroxyisovaleric acid          | 1.303 | -1.900 | PM |
| Lmtn004049 (C15H20O4)                    | Abscisic acid                            | 1.216 | -1.969 | PM |
| mws0425 (C5H6O4)                         | Citraconic acid                          | 1.259 | -2.295 | PM |
| Lmgn000160 (C4H8N2O3)                    | 3-Ureidopropionic acid                   | 1.315 | -3.215 | PM |

|                                                               |                                                         |       |         |    |
|---------------------------------------------------------------|---------------------------------------------------------|-------|---------|----|
| Zmyn002323 (C <sub>8</sub> H <sub>8</sub> O <sub>3</sub> )    | 2-Hydroxyphenylacetic acid                              | 1.305 | -4.228  | PM |
| Lmrn003000 (C <sub>9</sub> H <sub>10</sub> O <sub>3</sub> )   | 2-Hydroxy-3-phenylpropanoic acid                        | 1.312 | -9.494  | PM |
| <b>Terpenoids</b>                                             |                                                         |       |         |    |
| <b>Triterpene</b>                                             |                                                         |       |         |    |
| Lmqp012453 (C <sub>30</sub> H <sub>48</sub> O <sub>2</sub> )  | Ursolaldehyde                                           | 1.311 | 1.072   | SM |
| mws1610 (C <sub>30</sub> H <sub>48</sub> O <sub>4</sub> )     | Maslinic acid                                           | 1.297 | -2.068  | SM |
| pmn001706 (C <sub>30</sub> H <sub>48</sub> O <sub>4</sub> )   | 2-Hydroxyoleanolic acid                                 | 1.299 | -2.163  | SM |
| Lmzn006284 (C <sub>30</sub> H <sub>48</sub> O <sub>4</sub> )  | 2 $\alpha$ -Hydroxyursolic acid                         | 1.300 | -2.228  | SM |
| <b>Sesquiterpenoids</b>                                       |                                                         |       |         |    |
| mws1526 (C <sub>16</sub> H <sub>22</sub> O <sub>9</sub> )     | Sweroside                                               | 1.311 | 4.441   | SM |
| pmp001054 (C <sub>17</sub> H <sub>24</sub> O <sub>11</sub> )  | Gardenoside                                             | 1.315 | -13.026 | SM |
| <b>Diterpenoids</b>                                           |                                                         |       |         |    |
| pme3459 (C <sub>20</sub> H <sub>28</sub> O <sub>3</sub> )     | Cafestol                                                | 1.312 | -1.882  | SM |
| Cmmn013378 (C <sub>20</sub> H <sub>30</sub> O <sub>2</sub> )  | Levopimaric acid                                        | 1.242 | -2.244  | SM |
| <b>Phenolic acids</b>                                         |                                                         |       |         |    |
| <b>Phenolic acids</b>                                         |                                                         |       |         |    |
| ML10179289 (C <sub>8</sub> H <sub>10</sub> O)                 | 2-Phenylethanol                                         | 1.316 | 17.522  | SM |
| pmn001382 (C <sub>25</sub> H <sub>24</sub> O <sub>12</sub> )  | Isochlorogenic acid A                                   | 1.316 | 15.134  | SM |
| pmn001384 (C <sub>25</sub> H <sub>24</sub> O <sub>12</sub> )  | Isochlorogenic acid C                                   | 1.316 | 14.925  | SM |
| mws1686 (C <sub>9</sub> H <sub>10</sub> O <sub>3</sub> )      | Paeonol                                                 | 1.315 | 13.581  | SM |
| Hmhn000927 (C <sub>12</sub> H <sub>16</sub> O <sub>8</sub> )  | Phloroglucinol-1-O- $\beta$ -D-glucopyranoside          | 1.315 | 12.721  | SM |
| Cmjn004337 (C <sub>18</sub> H <sub>26</sub> O <sub>10</sub> ) | Benzyl-(2"-O-xylosyl) glucoside                         | 1.316 | 10.881  | SM |
| pmn001319 (C <sub>22</sub> H <sub>22</sub> O <sub>8</sub> )   | 1-O-Feruloyl-3-O-p-coumaroylglycerol                    | 1.035 | 5.472   | SM |
| Lmjp004702 (C <sub>9</sub> H <sub>10</sub> O <sub>4</sub> )   | 2',4'-Dihydroxy-6'-methoxyacetophenone                  | 1.231 | 3.465   | SM |
| Cmyp005062 (C <sub>20</sub> H <sub>22</sub> O <sub>9</sub> )  | Salireposide                                            | 1.311 | 2.992   | SM |
| pmb2795 (C <sub>10</sub> H <sub>10</sub> O <sub>3</sub> )     | 4-Methoxycinnamic acid                                  | 1.311 | 2.799   | SM |
| mws1195 (C <sub>10</sub> H <sub>10</sub> O <sub>3</sub> )     | p-Coumaric acid methyl ester                            | 1.313 | 2.742   | SM |
| pme3255 (C <sub>11</sub> H <sub>14</sub> O <sub>2</sub> )     | Methyleugenol                                           | 1.036 | 2.578   | SM |
| Lmtn002565 (C <sub>14</sub> H <sub>18</sub> O <sub>9</sub> )  | 1-O-Vanilloyl-D-glucose                                 | 1.103 | 2.180   | SM |
| Lmhn002926 (C <sub>13</sub> H <sub>12</sub> O <sub>7</sub> )  | p-Coumaroylmalic acid                                   | 1.300 | 1.722   | SM |
| pmn001672 (C <sub>23</sub> H <sub>32</sub> O <sub>15</sub> )  | Furanofructosyl- $\alpha$ -D-(3-mustard acyl) glucoside | 1.229 | 1.371   | SM |
| pma6460 (C <sub>16</sub> H <sub>18</sub> O <sub>8</sub> )     | 4-O-p-Coumaroylquinic acid                              | 1.235 | 1.347   | SM |
| pmb0752 (C <sub>17</sub> H <sub>20</sub> O <sub>9</sub> )     | 3-O-Feruloylquinic acid                                 | 1.271 | 1.200   | SM |
| Lmsn003628 (C <sub>23</sub> H <sub>32</sub> O <sub>15</sub> ) | 6'-O-Sinapoylsucrose                                    | 1.215 | 1.149   | SM |
| Lmmn005696 (C <sub>15</sub> H <sub>16</sub> O <sub>3</sub> )  | Desoxyhemigossypol                                      | 1.191 | 1.134   | SM |
| Lmbp002309 (C <sub>17</sub> H <sub>22</sub> O <sub>9</sub> )  | Sinapaldehyde-4-O-glucoside                             | 1.085 | 1.084   | SM |
| pmb2620 (C <sub>11</sub> H <sub>12</sub> O <sub>4</sub> )     | 3,4-Dimethoxycinnamic acid                              | 1.267 | 1.072   | SM |
| Hmln002806 (C <sub>16</sub> H <sub>16</sub> O <sub>8</sub> )  | 5-O-Caffeoylshikimic acid                               | 1.140 | 1.027   | SM |
| pmb3074 (C <sub>16</sub> H <sub>18</sub> O <sub>8</sub> )     | 5-O-p-Coumaroylquinic acid                              | 1.208 | 1.009   | SM |
| mws1150 (C <sub>35</sub> H <sub>46</sub> O <sub>20</sub> )    | Echinacoside                                            | 1.107 | -1.030  | SM |
| mws2367 (C <sub>14</sub> H <sub>20</sub> O <sub>7</sub> )     | Salidroside                                             | 1.241 | -1.031  | SM |
| Lmbn001981 (C <sub>7</sub> H <sub>6</sub> O <sub>3</sub> )    | 2,5-Dihydroxybenzaldehyde                               | 1.293 | -1.042  | SM |
| Zmhn001358 (C <sub>13</sub> H <sub>16</sub> O <sub>8</sub> )  | 4-O-Glucosyl-4-hydroxybenzoic acid                      | 1.241 | -1.053  | SM |
| pmn001420 (C <sub>15</sub> H <sub>18</sub> O <sub>9</sub> )   | 1-O-[(E)-Caffeoyl]-D-glucose                            | 1.254 | -1.080  | SM |
| Zmhn001793 (C <sub>15</sub> H <sub>18</sub> O <sub>9</sub> )  | 6-O-Caffeoyl-D-glucose                                  | 1.232 | -1.100  | SM |
| Hmtn001302 (C <sub>13</sub> H <sub>16</sub> O <sub>8</sub> )  | Glucosyloxybenzoic acid                                 | 1.237 | -1.159  | SM |
| Lmhn002573 (C <sub>17</sub> H <sub>20</sub> O <sub>11</sub> ) | Sinapoylglucuronic acid                                 | 1.263 | -1.160  | SM |
| mws4085 (C <sub>11</sub> H <sub>12</sub> O <sub>5</sub> )     | Sinapic acid                                            | 1.158 | -1.183  | SM |
| Zmhn001926 (C <sub>13</sub> H <sub>16</sub> O <sub>8</sub> )  | 1-O-Salicyl-D-glucose                                   | 1.259 | -1.185  | SM |
| mws0182 (C <sub>8</sub> H <sub>8</sub> O <sub>3</sub> )       | p-Hydroxyphenyl acetic acid                             | 1.234 | -1.334  | SM |
| Zmhn002227 (C <sub>17</sub> H <sub>22</sub> O <sub>10</sub> ) | 4-O-Glucosyl-sinapate                                   | 1.308 | -1.351  | SM |
| pme2362 (C <sub>8</sub> H <sub>8</sub> O <sub>3</sub> )       | Mandelic acid                                           | 1.187 | -1.785  | SM |
| Hmhn003518 (C <sub>16</sub> H <sub>20</sub> O <sub>9</sub> )  | 4-O- $\beta$ -D-glucopyranosylferulic acid              | 1.280 | -1.866  | SM |

|                               |                                                         |       |         |    |
|-------------------------------|---------------------------------------------------------|-------|---------|----|
| pmn001669 (C12H14O5)          | Methyl sinapate                                         | 1.300 | -1.893  | SM |
| Hmmn002544 (C16H20O9)         | Ferulic acid-4-O-glucoside                              | 1.312 | -2.456  | SM |
| MWSslk062 (C15H14O3)          | 4'-Methoxyresveratrol                                   | 1.307 | -2.615  | SM |
| pmb2936 (C28H32O14)           | Disinapoyl glucoside                                    | 1.193 | -2.647  | SM |
| pmb0069 (C7H7NO)              | Benzamide                                               | 1.300 | -3.598  | SM |
| mad2116 (C22H18O10)           | Bis(p-Coumaroyl) tartaric acid                          | 1.314 | -10.125 | SM |
| pmb3066 (C22H26O12)           | 5-O-p-Coumaroylshikimic acid O-glucoside                | 1.315 | -10.750 | SM |
| Zmhn002334 (C16H20O9)         | 6-O-Feruloyl-D-glucose                                  | 1.316 | -12.656 | SM |
| mws0117 (C9H10O4)             | Homovanillic acid; 4-Hydroxy-3-methoxyphenylacetic acid | 1.315 | -13.215 | SM |
| <b>Flavonoids</b>             |                                                         |       |         |    |
| <b><i>Dihydroflavone</i></b>  |                                                         |       |         |    |
| mws1066 (C27H32O14)           | Naringenin-7-O-rutinoside (Narirutin)                   | 1.290 | 2.483   | SM |
| mws0046 (C27H32O14)           | Naringenin-7-O-neohesperidoside (Naringin)              | 1.251 | 2.461   | SM |
| pmp000114 (C21H24O8)          | 5,6,7,8,3',4'-Hexamethoxyflavanone                      | 1.315 | -9.720  | SM |
| <b><i>Dihydroflavonol</i></b> |                                                         |       |         |    |
| mws1361 (C21H22O11)           | Taxifolin-3-O-rhamnoside (Astilbin)                     | 1.309 | 9.720   | SM |
| HJN104 (C21H22O13)            | Dihydromyricetin-3-O-glucoside                          | 1.181 | -1.212  | SM |
| <b><i>Isoflavones</i></b>     |                                                         |       |         |    |
| pmp000550 (C22H22O10)         | Calycosin-7-O-glucoside                                 | 1.049 | 1.166   | SM |
| <b><i>Anthocyanins</i></b>    |                                                         |       |         |    |
| pmb2962 (C23H23O11+)          | Pelargonidin-3-O-(6"-O-acetyl) glucoside                | 1.315 | 11.546  | SM |
| <b><i>Flavonoid</i></b>       |                                                         |       |         |    |
| Hmcp002187 (C23H24O13)        | Limocitrin-3-O-galactoside                              | 1.308 | 10.189  | SM |
| MWSHY0018 (C21H22O8)          | Nobiletin (5,6,7,8,3',4'-Hexamethoxyflavone)            | 1.315 | 8.917   | SM |
| Lmyn006227 (C15H10O5)         | Galangin (3,5,7-Trihydroxyflavone)                      | 1.313 | 8.678   | SM |
| pme1662 (C16H14O5)            | 5,4'-Dihydroxy-7-methoxyflavanone (Sakuranetin)         | 1.199 | 1.893   | SM |
| pmp000172 (C23H24O11)         | 5,2'-Dihydroxy-7,8-dimethoxyflavone glycosides          | 1.150 | 1.827   | SM |
| MWSHY0118 (C19H18O6)          | Scutellarein tetramethyl ether                          | 1.108 | 1.618   | SM |
| Cmsp008121 (C16H14O5)         | 7-O-Methylnaringenin                                    | 1.085 | 1.471   | SM |
| mws1313 (C20H20O7)            | Sinensetin (5,6,7,3',4'-pentamethoxyflavone)            | 1.082 | 1.305   | SM |
| HJAP006 (C23H24O13)           | Syringetin-7-O-glucoside                                | 1.050 | 1.071   | SM |
| Lmyp004617 (C21H22O9)         | Pinocembrin-7-O-glucoside (Pinocembroside)              | 1.245 | -1.034  | SM |
| pmp000109 (C19H18O6)          | 5,7,8,4'-Tetramethoxyflavone                            | 1.305 | -1.686  | SM |
| Lmgp004283 (C16H13O5+)        | 5-Methoxyluteolinidin                                   | 1.283 | -4.337  | SM |
| mws1073 (C27H30O15)           | Apigenin-6,8-di-C-glucoside (Vicenin-2)                 | 1.279 | -8.079  | SM |
| pmp000010 (C17H14O8)          | 5,7,4',5'-Tetrahydro-3',6-dimethoxyflavone              | 1.306 | -9.145  | SM |
| HJN051 (C28H32O16)            | Tamarixetin-3-O-rutinoside                              | 1.310 | -9.800  | SM |
| pmb0578 (C32H30O15)           | Luteolin-7-O-(6"-sinapoyl) glucoside                    | 1.314 | -9.881  | SM |
| pma0760 (C25H24O15)           | 3'-O-Methyltricetin-7-O-(6"-malonyl) glucoside          | 1.303 | -10.437 | SM |
| pmb0580 (C21H20O9)            | Chrysin-5-O-glucoside (Toringin)                        | 1.315 | -11.128 | SM |
| Lmlp003531 (C21H20O11)        | Luteolin-3'-O-glucoside                                 | 1.316 | -11.365 | SM |
| <b><i>Flavonols</i></b>       |                                                         |       |         |    |
| pmn001642 (C23H20O13)         | Kaempferol-3-O-(2"-O-acetyl) glucuronide                | 1.316 | 13.299  | SM |
| Zmsp004363 (C23H22O13)        | Quercetin-3-O-(6"-acetyl) glucoside                     | 1.313 | 10.627  | SM |

|                              |                                                           |       |         |    |
|------------------------------|-----------------------------------------------------------|-------|---------|----|
| Lmpn006208 (C22H22O11)       | 8-Methoxykaempferol-7-O-rhamnoside                        | 1.287 | -1.138  | SM |
| pmn001551 (C21H22O9)         | Natsudaoidin (3-Hydroxy-3',4',5,6,7,8-hexamethoxyflavone) | 1.191 | -1.190  | SM |
| Hmcp001578 (C28H32O17)       | Isorhamnetin-3,7-O-diglucoside                            | 1.312 | -3.355  | SM |
| mws0988 (C16H12O7)           | Rhamnetin                                                 | 1.311 | -8.351  | SM |
| Hmln002199 (C23H22O13)       | Quercetin-3-O-(6"-acetyl) galactoside                     | 1.299 | -10.070 | SM |
| mws0089 (C21H20O11)          | Kaempferol-7-O-glucoside                                  | 1.312 | -10.736 | SM |
| Li512111 (C24H24O13)         | Isorhamnetin-3-O-(6"-acetyl)glucoside                     | 1.314 | -11.602 | SM |
| Hmln002189 (C24H22O15)       | Quercetin-3-O-(6"-malonyl) galactoside                    | 1.310 | -12.037 | SM |
| <b>Flavonoid carbonoside</b> |                                                           |       |         |    |
| pmb0665 (C27H30O16)          | Orientin-7-O-glucoside                                    | 1.313 | 9.368   | SM |
| pme1665 (C27H30O15)          | Isovitexin-7-O-glucoside (Saponarin)                      | 1.310 | 8.988   | SM |
| pmp000236 (C26H28O14)        | Isovitexin-8-O-xylcoside                                  | 1.296 | -1.850  | SM |
| MWSSlk254 (C27H30O15)        | Kaempferol-3-O-glucorhamnoside                            | 1.303 | -8.316  | SM |
| pmb0618 (C28H34O16)          | Hesperetin-8-C-glucoside-3'-O-glucoside                   | 1.314 | -10.562 | SM |
| <b>Lignans and coumarins</b> |                                                           |       |         |    |
| <b>Coumarins</b>             |                                                           |       |         |    |
| Lmzp003497 (C19H24O5)        | Marmin [7-(6',7'-dihydroxygeranyloxy) coumarin]           | 1.313 | 9.756   | SM |
| Cmpp010709 (C19H22O3)        | Aurapten                                                  | 1.304 | 7.921   | SM |
| pmp000284 (C11H10O5)         | Fraxidin (8-Hydroxy-6,7-dimethoxycoumarin)                | 1.236 | 3.363   | SM |
| mws1639 (C11H10O5)           | Isofraxidin                                               | 1.231 | 3.252   | SM |
| mws1076 (C11H10O4)           | Scoparone                                                 | 1.267 | 2.941   | SM |
| Hmlp006964 (C12H12O5)        | 5,6,7-Trimethoxycoumarin                                  | 1.235 | 2.931   | SM |
| MWSCX014 (C10H8O4)           | Scopoletin (7-Hydroxy-5-methoxycoumarin)                  | 1.198 | 1.671   | SM |
| mws1074 (C9H6O4)             | Daphnetin                                                 | 1.274 | 1.635   | SM |
| Cmpp005475 (C15H16O4)        | Meranzin                                                  | 1.231 | 1.471   | SM |
| pmf0525 (C16H14O4)           | Imperatorin                                               | 1.282 | 1.419   | SM |
| Hmcp002123 (C10H8O4)         | Isoscopoletin (6-Hydroxy-7-methoxycoumarin)               | 1.149 | 1.416   | SM |
| Zmnn010135 (C15H16O4)        | Sibiricol                                                 | 1.202 | 1.293   | SM |
| Hmhp002580 (C19H24O10)       | Methylpicraquassioside A                                  | 1.093 | 1.270   | SM |
| Cmpp004946 (C26H32O8)        | Isoobacunoic acid                                         | 1.284 | -1.028  | SM |
| pma0104 (C20H16O7)           | N-Sinapoylhydroxycoumarin                                 | 1.202 | -1.206  | SM |
| mws4173 (C11H10O4)           | 5,7-Dimethoxycoumarin (Limettin) (Citropten)              | 1.277 | -1.215  | SM |
| Zmln002252 (C10H8O6)         | Sideretin (5,7,8-Trihydroxy-6-methoxycoumarin)            | 1.178 | -1.344  | SM |
| <b>Lignans</b>               |                                                           |       |         |    |
| HJN083 (C26H34O11)           | Lariciresinol-4'-O-glucoside                              | 1.128 | -1.186  | SM |
| Zmhn001446 (C28H36O13)       | syringaresinol-4'-O-glucopyranosid                        | 1.259 | -1.347  | SM |
| Hmln002355 (C27H34O12)       | 5'-Methoxymatairesinoside                                 | 1.281 | -1.412  | SM |
| Rfmb26201 (C30H38O14)        | Syringaresinol-4'-O-(6"-acetyl) glucoside                 | 1.249 | -1.551  | SM |
| Lmqn001932 (C28H36O13)       | Syringaresinol-4'-O-glucoside                             | 1.282 | -2.099  | SM |
| Lmdn001925 (C26H34O12)       | Olivil-4'-O-glucoside                                     | 1.311 | -10.604 | SM |
| <b>Tannins</b>               |                                                           |       |         |    |
| <b>Tannins</b>               |                                                           |       |         |    |
| Hmln000873 (C13H16O10)       | 2-O-Galloyl-D-glucose                                     | 1.315 | 13.529  | SM |
| mws0024 (C7H6O5)             | Gallic acid                                               | 1.150 | -1.922  | SM |
| <b>Alkaloids</b>             |                                                           |       |         |    |
| <b>Phenolamine</b>           |                                                           |       |         |    |

|                                 |                                                                 |       |         |    |
|---------------------------------|-----------------------------------------------------------------|-------|---------|----|
| pmp001252 (C17H17NO3)           | p-Coumaroyltyramine                                             | 1.103 | 1.706   | SM |
| pmb0492 (C34H37N3O6)            | N',N'',N'''-p-Coumaroyl-cinnamoyl-caffeoyl spermidine           | 1.213 | -1.296  | SM |
| pme2693 (C6H14N2O)              | N-Acetylputrescine                                              | 1.265 | -1.748  | SM |
| pme2292 (C4H12N2)               | Putrescine                                                      | 1.261 | -2.478  | SM |
| Lmlp003161 (C14H20N2O3)         | N-Feruloylputrescine                                            | 1.316 | -15.341 | SM |
| <b>Plumerane</b>                |                                                                 |       |         |    |
| pme2244 (C11H11NO2)             | 3-Indolepropionic acid                                          | 1.310 | 3.502   | SM |
| Hmmp002124 (C9H7NO)             | Indole-3-carboxaldehyde                                         | 1.314 | 3.479   | SM |
| Zmtn001624 (C10H7NO3)           | N-Acetylisatin                                                  | 1.206 | 1.359   | SM |
| <b>Alkaloids</b>                |                                                                 |       |         |    |
| Lmcp000282 (C7H15NO3)           | L-Carnitine                                                     | 1.309 | 5.679   | SM |
| pme1691 (C7H16NO2)              | Acetylcholine                                                   | 1.301 | 4.145   | SM |
| mws1346 (C6H11NO4)              | DL-2-Aminoadipic acid                                           | 1.310 | 3.389   | SM |
| mws0704 (C2H8NO4P)              | O-Phosphorylethanolamine                                        | 1.270 | 1.789   | SM |
| pme2268 (C7H7NO2)               | Trigonelline                                                    | 1.288 | 1.699   | SM |
| mws0677 (C12H14N2O2)            | N-Acetyl-5-hydroxytryptamine                                    | 1.186 | 1.109   | SM |
| mws0191 (C5H11NO2)              | Betaine                                                         | 1.254 | 1.082   | SM |
| Lmlp001118 (C23H29NO8)          | 3'-Glucosyl-6,7-dihydroxy-N-methyl-benzyltetrahydroisoquinoline | 1.188 | 1.020   | SM |
| MWSmce157 (C7H13NO2)            | Stachydrine                                                     | 1.259 | -1.008  | SM |
| pmp001287 (C8H9N)               | N-Benzylmethylene isomethylamine                                | 1.276 | -1.083  | SM |
| pma6298 (C5H5NO)                | 3-Hydroxypyridine                                               | 1.216 | -1.127  | SM |
| pmp001101 (C15H15NO2)           | N-Methylflindersine                                             | 1.275 | -1.326  | SM |
| Lmlp002994 (C11H11NO2)          | 5-Hydroxyquinoline                                              | 1.121 | -1.420  | SM |
| Zmnn011234 (C20H21NO5)          | Buntanine                                                       | 1.294 | -1.668  | SM |
| pmp001083 (C34H53N7O9)          | Citrusin I                                                      | 1.294 | -1.682  | SM |
| mws0983 (C20H39NO2)             | N-Oleoylethanolamine                                            | 1.297 | -2.156  | SM |
| pma0948 (C8H11NO)               | Phenylethanolamine                                              | 1.263 | -2.260  | SM |
| pmp001214 (C16H24NO5+)          | Sinapine                                                        | 1.249 | -2.432  | SM |
| Lmtp003569 (C8H9NO2)            | R-mandelamide                                                   | 1.267 | -2.858  | SM |
| Zmnn009241 (C16H15NO5)          | Citpressine I                                                   | 1.291 | -3.045  | SM |
| mws0491 (C8H11N)                | Phenethylamine                                                  | 1.303 | -3.550  | SM |
| MWSmce175 (C9H13NO2)            | (-)-Synephrine                                                  | 1.312 | -3.950  | SM |
| MWStz147 (C9H13NO2)             | Synephrine; 4-[1-Hydroxy-2-(methylamino)ethyl] phenol           | 1.313 | -4.237  | SM |
| <b>Others</b>                   |                                                                 |       |         |    |
| <b>Saccharides and alcohols</b> |                                                                 |       |         |    |
| Zmyn000083 (C6H14O12P2)         | D-Glucose 1,6-bisphosphate                                      | 1.292 | 2.623   | PM |
| mws2104 (C7H14O6)               | D-Pinitol                                                       | 1.309 | 2.105   | PM |
| pme0516 (C6H12O6)               | Inositol                                                        | 1.312 | 1.657   | PM |
| pmb3079 (C8H16NO9P)             | N-Acetyl-D-glucosamine-1-phosphate                              | 1.294 | 1.463   | PM |
| pmb2653 (C24H42O20)             | D(+)-Melezitose O-rhamnoside                                    | 1.160 | 1.423   | PM |
| pme0534 (C6H12O7)               | Gluconic acid                                                   | 1.305 | 1.360   | PM |
| Zmzn000078 (C3H7O6P)            | Dihydroxyacetone phosphate                                      | 1.248 | 1.339   | PM |
| pmb3081 (C6H11PO11)             | Glucarate O-phosphoric acid                                     | 1.293 | 1.309   | PM |
| Zmyn000108 (C6H10O8)            | D-Saccharic acid                                                | 1.028 | 1.214   | PM |
| pme2529 (C6H12O5)               | 1,5-Anhydro-D-glucitol                                          | 1.269 | 1.178   | PM |
| pme3311 (C6H14O12P2)            | D-Fructose-1,6-biphosphate                                      | 1.301 | 1.177   | PM |
| pme3705 (C6H10O7)               | D-Glucuronic acid                                               | 1.305 | 1.113   | PM |
| mws4175 (C6H8O6)                | D-Glucurono-6,3-lactone                                         | 1.052 | 1.060   | PM |
| mws4170 (C6H12O6)               | D-Glucose                                                       | 1.104 | -1.009  | PM |
| pmf0139 (C6H12O6)               | D-Galactose                                                     | 1.136 | -1.113  | PM |
| pmf0138 (C6H12O6)               | D-Mannose                                                       | 1.243 | -1.564  | PM |
| MWS0559 (C6H10O5)               | 1,6-anhydro-β-D-glucose                                         | 1.187 | -1.802  | PM |

|                                                                           |                                      |       |        |    |
|---------------------------------------------------------------------------|--------------------------------------|-------|--------|----|
| pma0134 (C <sub>4</sub> H <sub>8</sub> O <sub>4</sub> )                   | D-(-)-Threose                        | 1.248 | -1.945 | PM |
| <b><i>Vitamin</i></b>                                                     |                                      |       |        |    |
| pme2266 (C <sub>10</sub> H <sub>16</sub> N <sub>2</sub> O <sub>3</sub> S) | Biotin                               | 1.127 | 1.386  | PM |
| pma3101 (C <sub>11</sub> H <sub>14</sub> N <sub>6</sub> O <sup>+</sup> )  | Nicotinate D-ribonucleoside          | 1.202 | 1.136  | PM |
| pma1751 (C <sub>12</sub> H <sub>15</sub> N <sub>7</sub> O)                | N-(beta-D-Glucosyl) nicotinate       | 1.238 | 1.084  | PM |
| mws0232 (C <sub>17</sub> H <sub>20</sub> N <sub>4</sub> O <sub>6</sub> )  | Riboflavin (Vitamin B <sub>2</sub> ) | 1.276 | -1.104 | PM |
| <b><i>Xanthone</i></b>                                                    |                                      |       |        |    |
| pmp001006 (C <sub>16</sub> H <sub>14</sub> O <sub>5</sub> )               | 1,3,7-Trimethoxyxanthone             | 1.271 | -2.027 | SM |
| <b><i>Others</i></b>                                                      |                                      |       |        |    |
| Zmjp003597 (C <sub>19</sub> H <sub>32</sub> O <sub>8</sub> )              | Ampelopsionoside                     | 1.314 | 16.357 | SM |
| MWSmce417 (C <sub>22</sub> H <sub>28</sub> O <sub>10</sub> )              | 5-O-Methylvisammioside               | 1.315 | 12.635 | SM |
| Cmyp007180 (C <sub>11</sub> H <sub>16</sub> O <sub>2</sub> )              | Dihydroactinidiolide                 | 1.311 | 4.424  | SM |
| Hmln003529 (C <sub>18</sub> H <sub>26</sub> O <sub>10</sub> )             | Benzyl β-primeveroside               | 1.286 | 1.316  | SM |
| pmb0764 (C <sub>6</sub> H <sub>9</sub> NOS)                               | 4-Methyl-5-thiazoleethanol           | 1.307 | -1.156 | SM |
| Lmtn002233 (C <sub>15</sub> H <sub>20</sub> O <sub>8</sub> )              | Androsin                             | 1.057 | -1.269 | SM |
| HJAP158 (C <sub>19</sub> H <sub>21</sub> N <sub>4</sub> O)                | Aromatide                            | 1.237 | -1.675 | SM |
| pmn001423 (C <sub>19</sub> H <sub>30</sub> O <sub>8</sub> )               | Roseoside                            | 1.214 | -2.165 | SM |
| ML10197929 (C <sub>4</sub> H <sub>9</sub> N <sub>3</sub> O <sub>2</sub> ) | Creatine                             | 1.246 | -2.168 | SM |
| Lmbp000728 (C <sub>8</sub> H <sub>8</sub> O)                              | (S)-2-Phenyloxirane                  | 1.274 | -2.245 | SM |

PM, primary metabolite; SM, secondary metabolite; FC, fold change.

**Table S4.** Summary of the RNA-Seq data collected from RN15 and RN0. Q20 and Q30 mean sequencing error rates lower than 1% and 1%, respectively.

| Samples | Raw reads | Clean reads (%)  | Clean bases (G) | Error rate (%) | Q20 (%) | Q30 (%) | Adapter (%) | N (%) | Low quality (%) | GC content (%) |
|---------|-----------|------------------|-----------------|----------------|---------|---------|-------------|-------|-----------------|----------------|
| RN15-1  | 46522776  | 45174364 (97.10) | 6.78            | 0.03           | 97.85   | 93.59   | 2.67        | 0.00  | 0.23            | 44.48          |
| RN15-2  | 44587434  | 43131602 (96.73) | 6.47            | 0.03           | 97.99   | 93.88   | 3.12        | 0.00  | 0.15            | 44.26          |
| RN15-3  | 41108156  | 40050154 (97.43) | 6.01            | 0.03           | 97.88   | 93.61   | 2.41        | 0.00  | 0.16            | 44.37          |
| RN0-1   | 45227514  | 44099224 (97.51) | 6.61            | 0.03           | 97.98   | 93.82   | 2.38        | 0.00  | 0.12            | 43.98          |
| RN0-2   | 44272730  | 43166134 (97.50) | 6.47            | 0.03           | 97.86   | 93.52   | 2.37        | 0.00  | 0.13            | 44.06          |
| RN0-3   | 45251794  | 44237816 (97.76) | 6.64            | 0.03           | 97.97   | 93.79   | 2.13        | 0.00  | 0.11            | 44.09          |

**Table S5.** Summary of clean reads and genes mapped to the reference genome from RN15 and RN0

| Samples | Total reads | Reads mapped      | Uniquely mapped reads | Multiply mapped reads | Read1 mapped      | Read2 mapped      | '+' mapped        | '-' mapped        |
|---------|-------------|-------------------|-----------------------|-----------------------|-------------------|-------------------|-------------------|-------------------|
| RN15-1  | 45174364    | 41930799 (92.82%) | 39990948 (88.53%)     | 3259244 (4.29%)       | 20012285 (44.30%) | 19978663(44.23%)  | 19993961 (44.26%) | 19996987 (44.27%) |
| RN15-2  | 43131602    | 40326052 (93.50%) | 38427108 (89.09%)     | 3253046 (4.40%)       | 19218128 (44.56%) | 19208980 (44.45%) | 19206737 (44.53%) | 19220371 (44.56%) |
| RN15-3  | 40050154    | 37347855 (93.25%) | 35649644 (89.01%)     | 2842430 (4.24%)       | 17837977 (44.54%) | 17811667 (44.47%) | 17818565 (44.49%) | 17831079 (44.52%) |
| RN0-1   | 44099224    | 40149564 (91.04%) | 38278739 (86.80%)     | 2989834 (4.24%)       | 19150963 (43.43%) | 19127776 (43.37%) | 19173933 (43.48%) | 19104806 (43.32%) |
| RN0-2   | 43166134    | 39720705 (92.02%) | 37899934 (87.80%)     | 2987110 (4.22%)       | 18971617 (43.95%) | 18928317 (43.85%) | 18976959 (43.96%) | 18922975(43.84%)  |
| RN0-3   | 44237816    | 40021717 (90.47%) | 38177423 (86.30%)     | 3005303 (4.17%)       | 19102809 (43.18%) | 19074614 (43.12%) | 19131705 (43.25%) | 19045718(43.05%)  |

**Table S10.** DEGs and DAMs related to N, protein, and amino acid metabolisms in RN0

| Accession No.                                            | KEGG annotation                                                                                                              | Swissprot annotation (KOG)                                                                                                             | Log <sub>2</sub> (FC) |
|----------------------------------------------------------|------------------------------------------------------------------------------------------------------------------------------|----------------------------------------------------------------------------------------------------------------------------------------|-----------------------|
| <b><i>Nitrogen metabolism (ko00910, P = 0.0007)</i></b>  |                                                                                                                              |                                                                                                                                        |                       |
| Cs7g19160                                                | K00261 glutamate dehydrogenase (NAD(P)+) [EC:1.4.1.3]   (RefSeq) glutamate dehydrogenase 2 (A)                               | Glutamate dehydrogenase 2; GDH 2; EC=1.4.1.3 (At5g07440)                                                                               | -2.490                |
| Cs3g17310                                                | K01673 carbonic anhydrase [EC:4.2.1.1]   (RefSeq) beta carbonic anhydrase 5, chloroplastic-like (A)                          | Beta carbonic anhydrase 5, chloroplastic; AtbCA5; AtbetaCA5; EC=4.2.1.1; Beta carbonate dehydratase 5; Flags: Precursor (At1g58180)    | -2.074                |
| Cs8g10280                                                | K01673 carbonic anhydrase [EC:4.2.1.1]   (RefSeq) beta carbonic anhydrase 5, chloroplastic-like (A)                          | Beta carbonic anhydrase 5, chloroplastic; AtbCA5; AtbetaCA5; EC=4.2.1.1; Beta carbonate dehydratase 5; Flags: Precursor (At1g58180)    | 2.896                 |
| Cs6g14540                                                | K01674 carbonic anhydrase [EC:4.2.1.1]   (RefSeq) alpha carbonic anhydrase 1, chloroplastic-like (A)                         | Alpha carbonic anhydrase 1, chloroplastic; AtaCA1; AtalphaCA1; EC=4.2.1.1; Alpha carbonate dehydratase 1; Flags: Precursor (At3g52720) | 6.362                 |
| Cs8g16250                                                | K01674 carbonic anhydrase [EC:4.2.1.1]   (RefSeq) alpha carbonic anhydrase 7-like (A)                                        | Alpha carbonic anhydrase 7; AtaCA7; AtalphaCA7; EC=4.2.1.1; Alpha carbonate dehydratase 7; Flags: Precursor (At1g08080)                | 1.952                 |
| Cs7g14020                                                | K01915 glutamine synthetase [EC:6.3.1.2]   (RefSeq) glutamine synthetase nodule isozyme (A)                                  | Glutamine synthetase nodule isozyme; GS; EC=6.3.1.2; Glutamate--ammonia ligase (At5g37600)                                             | 1.025                 |
| Cs9g05680                                                | K01915 glutamine synthetase [EC:6.3.1.2]   (RefSeq) glutamine synthetase leaf isozyme, chloroplastic (A)                     | Glutamine synthetase, chloroplastic; EC=6.3.1.2; GS2; Glutamate--ammonia ligase; Flags: Precursor (At5g35630)                          | 1.892                 |
| Cs2g27650                                                | K02575 MFS transporter, NNP family, nitrate/nitrite transporter   (RefSeq) high affinity nitrate transporter 2.7 (A)         | High affinity nitrate transporter 2.7; AtNRT2:7 (At5g14570)                                                                            | 3.174                 |
| Cs7g09040                                                | K02575 MFS transporter, NNP family, nitrate/nitrite transporter   (RefSeq) high affinity nitrate transporter 2.5 (A)         | High affinity nitrate transporter 2.5; AtNRT2:5 (At1g12940)                                                                            | 3.387                 |
| Cs8g16010                                                | K02575 MFS transporter, NNP family, nitrate/nitrite transporter   (RefSeq) high affinity nitrate transporter 2.4-like (A)    | High affinity nitrate transporter 2.4; AtNRT2:4 (At5g60770)                                                                            | 4.733                 |
| orange1.1t02415                                          | K02575 MFS transporter, NNP family, nitrate/nitrite transporter   (RefSeq) high affinity nitrate transporter 2.4-like (A)    | High affinity nitrate transporter 2.4; SATNRT2:4 (At5g60770)                                                                           | 7.149                 |
| Cs3g19060                                                | K10534 nitrate reductase (NAD(P)H) [EC:1.7.1.1 1.7.1.2 1.7.1.3]   (RefSeq) nitrate reductase [NAD(P)H]-like (A)              | Nitrate reductase [NAD(P)H]; NR; EC=1.7.1.2 (At1g37130_1)                                                                              | -2.160                |
| <b><i>Nitrate transport (GO:0015706, P = 0.0110)</i></b> |                                                                                                                              |                                                                                                                                        |                       |
| Cs4g16160                                                | K14638 solute carrier family 15 (peptide/histidine transporter), member 3/4   (RefSeq) protein NRT1/ PTR FAMILY 1.1-like (A) | Protein NRT1/ PTR FAMILY 1.2; AtNPF1.2; Nitrate transporter 1.11 (At1g52190)                                                           | 7.077                 |
| Cs8g16010                                                | K02575 MFS transporter, NNP family, nitrate/nitrite transporter   (RefSeq) high affinity nitrate transporter 2.4-like (A)    | High affinity nitrate transporter 2.4; AtNRT2:4 (At5g60770)                                                                            | 4.733                 |
| Cs7g09040                                                | K02575 MFS transporter, NNP family, nitrate/nitrite transporter   (RefSeq) high affinity nitrate transporter 2.5 (A)         | High affinity nitrate transporter 2.5; AtNRT2:5 (At1g12940)                                                                            | 3.387                 |

|                                                             |                                                                                                                              |                                                                                                                                                                |        |
|-------------------------------------------------------------|------------------------------------------------------------------------------------------------------------------------------|----------------------------------------------------------------------------------------------------------------------------------------------------------------|--------|
| orange1.1t02415                                             | K02575 MFS transporter, NNP family, nitrate/nitrite transporter   (RefSeq) high affinity nitrate transporter 2.4-like (A)    | High affinity nitrate transporter 2.4; SATNRT2:4 (At5g60770)                                                                                                   | 7.149  |
| Cs4g19640                                                   | K14638 solute carrier family 15 (peptide/histidine transporter), member 3/4   (RefSeq) protein NRT1/ PTR FAMILY 1.2-like (A) | Protein NRT1/ PTR FAMILY 1.2; AtNPF1.2; Nitrate transporter 1.11 (At1g52190)                                                                                   | 2.331  |
| Cs7g22760                                                   | K14638 solute carrier family 15 (peptide/histidine transporter), member 3/4   (RefSeq) protein NRT1/ PTR FAMILY 7.3 (A)      | Protein NRT1/ PTR FAMILY 7.3; AtNPF7.3; Nitrate transporter 1.5 (At1g32450)                                                                                    | 3.554  |
| Cs2g27650                                                   | K02575 MFS transporter, NNP family, nitrate/nitrite transporter   (RefSeq) high affinity nitrate transporter 2.7 (A)         | High affinity nitrate transporter 2.7; AtNRT2:7 (At5g14570)                                                                                                    | 3.174  |
| Cs1g15320                                                   | K14638 solute carrier family 15 (peptide/histidine transporter), member 3/4   (RefSeq) protein NRT1/ PTR FAMILY 1.2-like (A) | Protein NRT1/ PTR FAMILY 1.2; AtNPF1.2; Nitrate transporter 1.11 (At1g52190)                                                                                   | -3.751 |
| Cs4g20010                                                   | --                                                                                                                           | Nitrate regulatory gene2 protein {ECO:0000303 PubMed:26744214}; NRG2 protein {ECO:0000303 PubMed:26744214} (At5g25590)                                         | -1.999 |
| Cs5g09050                                                   | K14638 solute carrier family 15 (peptide/histidine transporter), member 3/4   (RefSeq) protein NRT1/ PTR FAMILY 8.1-like (A) | Protein NRT1/ PTR FAMILY 6.3; AtNPF6.3; Nitrate transporter 1.1; AtNRT1; Nitrate/chlorate transporter; Protein CHLORINA 1 (At1g12110)                          | -1.299 |
| Cs2g25150                                                   | K05016 chloride channel 7   (RefSeq) chloride channel protein CLC-b (A)                                                      | Chloride channel protein CLC-a; AtCLC-a; CBS domain-containing protein CBSCLC5 (At5g40890)                                                                     | -1.195 |
| Cs1g25740                                                   | --                                                                                                                           | Nitrate regulatory gene2 protein {ECO:0000303 PubMed:26744214}; NRG2 protein {ECO:0000303 PubMed:26744214} (At3g51290)                                         | -2.007 |
| novel.164                                                   | --                                                                                                                           | Precursor of CEP16 {ECO:0000305}; PCEP16 {ECO:0000305}; C-terminally encoded peptide 16 {ECO:0000305}; Short=CEP16 {ECO:0000305}; Flags: Precursor (At4g37290) | -1.716 |
|                                                             |                                                                                                                              |                                                                                                                                                                |        |
| <b><i>Nitrate assimilation (GO:0042128, P = 0.0019)</i></b> |                                                                                                                              |                                                                                                                                                                |        |
| Cs8g16010                                                   | K02575 MFS transporter, NNP family, nitrate/nitrite transporter   (RefSeq) high affinity nitrate transporter 2.4-like (A)    | High affinity nitrate transporter 2.4; AtNRT2:4 (At5g60770)                                                                                                    | 4.733  |
| Cs7g09040                                                   | K02575 MFS transporter, NNP family, nitrate/nitrite transporter   (RefSeq) high affinity nitrate transporter 2.5 (A)         | High affinity nitrate transporter 2.5; AtNRT2:5 (At1g12940)                                                                                                    | 3.387  |
| orange1.1t02415                                             | K02575 MFS transporter, NNP family, nitrate/nitrite transporter   (RefSeq) high affinity nitrate transporter 2.4-like (A)    | High affinity nitrate transporter 2.4; SATNRT2:4 (At5g60770)                                                                                                   | 7.149  |
| Cs5g01890                                                   | --                                                                                                                           | Protein NLP7; AtNLP7; NIN-like protein 7; Nodule inception protein-like protein 7 (At4g24020)                                                                  | 1.413  |
| Cs2g27650                                                   | K02575 MFS transporter, NNP family, nitrate/nitrite transporter   (RefSeq) high affinity nitrate transporter 2.7 (A)         | High affinity nitrate transporter 2.7; AtNRT2:7 (At5g14570)                                                                                                    | 3.174  |
| Cs3g19060                                                   | K10534 nitrate reductase (NAD(P)H) [EC:1.7.1.1 1.7.1.2 1.7.1.3]   (RefSeq) nitrate reductase [NAD(P)H]-like (A)              | Nitrate reductase [NAD(P)H]; NR; EC=1.7.1.2 (At1g37130_1)                                                                                                      | -2.160 |

|                                                                                     |                                                                                                                                                                                                                        |                                                                                                                                                                                                                                                                                                                                           |        |
|-------------------------------------------------------------------------------------|------------------------------------------------------------------------------------------------------------------------------------------------------------------------------------------------------------------------|-------------------------------------------------------------------------------------------------------------------------------------------------------------------------------------------------------------------------------------------------------------------------------------------------------------------------------------------|--------|
| Cs5g09050                                                                           | K14638 solute carrier family 15 (peptide/histidine transporter), member 3/4   (RefSeq) protein NRT1/ PTR FAMILY 8.1-like (A)                                                                                           | Protein NRT1/ PTR FAMILY 6.3; AtNPF6.3; Nitrate transporter 1.1; AtNRT1; Nitrate/chlorate transporter; Protein CHLORINA 1 (At1g12110)                                                                                                                                                                                                     | -1.299 |
| Cs7g04390                                                                           | K14638 solute carrier family 15 (peptide/histidine transporter), member 3/4   (RefSeq) protein NRT1/ PTR FAMILY 4.6 (A)                                                                                                | Protein NRT1/ PTR FAMILY 4.6; AtNPF4.6; Nitrate transporter 1.2; Nitrate transporter NTL1; Protein ABA-IMPORTING TRANSPORTER 1 (At1g69850)                                                                                                                                                                                                | 1.286  |
| Cs7g13190                                                                           | K14638 solute carrier family 15 (peptide/histidine transporter), member 3/4   (RefSeq) protein NRT1/ PTR FAMILY 3.1-like (A)                                                                                           | Protein NRT1/ PTR FAMILY 3.1; AtNPF3.1 (At1g68570)                                                                                                                                                                                                                                                                                        | -1.934 |
| Cs5g04280                                                                           | K14638 solute carrier family 15 (peptide/histidine transporter), member 3/4   (RefSeq) protein NRT1/ PTR FAMILY 4.6 (A)                                                                                                | Protein NRT1/ PTR FAMILY 4.6; AtNPF4.6; Nitrate transporter 1.2; Nitrate transporter NTL1; Protein ABA-IMPORTING TRANSPORTER 1 (At1g69850)                                                                                                                                                                                                | -2.012 |
| Cs5g07250                                                                           | --                                                                                                                                                                                                                     | SNF1-related protein kinase regulatory subunit gamma-1; AKIN subunit gamma-1; AKING1; AKINGgamma1; CBS domain-containing protein CBCSBS1 (At3g48530)                                                                                                                                                                                      | -1.199 |
|                                                                                     |                                                                                                                                                                                                                        |                                                                                                                                                                                                                                                                                                                                           |        |
| <b><i>Cellular nitrogen compound catabolic process (GO:0044270, P = 0.9570)</i></b> |                                                                                                                                                                                                                        |                                                                                                                                                                                                                                                                                                                                           |        |
| Cs6g20790                                                                           | K09285 AP2-like factor, ANT lineage   (RefSeq) AP2-like ethylene-responsive transcription factor At1g16060 (A)                                                                                                         | Ethylene-responsive transcription factor WR11; Protein ACTIVATOR OF SPORAMIN::LUC 1; Protein WRINKLED 1 (At1g16060)                                                                                                                                                                                                                       | 6.927  |
| Cs7g04300                                                                           | K09285 AP2-like factor, ANT lineage   (RefSeq) AP2-like ethylene-responsive transcription factor At1g16060 (A)                                                                                                         | Ethylene-responsive transcription factor WR11; Protein ACTIVATOR OF SPORAMIN::LUC 1; Protein WRINKLED 1 (At5g17430)                                                                                                                                                                                                                       | 9.012  |
| Cs2g06200                                                                           | K01466 allantoinase [EC:3.5.2.5]   (RefSeq) allantoinase (A)                                                                                                                                                           | Allantoinase; AtALN; EC=3.5.2.5 (YIR027c)                                                                                                                                                                                                                                                                                                 | 3.419  |
| orange1.1t05835                                                                     | K00161 pyruvate dehydrogenase E1 component alpha subunit [EC:1.2.4.1]   (RefSeq) pyruvate dehydrogenase E1 component subunit alpha-3, chloroplastic (A)                                                                | Pyruvate dehydrogenase E1 component subunit alpha-3, chloroplastic; EC=1.2.4.1; Flags: Precursor (At1g01090)                                                                                                                                                                                                                              | 2.430  |
| Cs3g22480                                                                           | K00627 pyruvate dehydrogenase E2 component (dihydrolipoamide acetyltransferase) [EC:2.3.1.12]   (RefSeq) dihydrolipoalysine-residue acetyltransferase component 5 of pyruvate dehydrogenase complex, chloroplastic (A) | Dihydrolipoalysine-residue acetyltransferase component 5 of pyruvate dehydrogenase complex, chloroplastic; EC=2.3.1.12; Dihydrolipoamide S-acetyltransferase component 5 of pyruvate dehydrogenase complex; Protein EMBRYO DEFECTIVE 3003; Pyruvate dehydrogenase complex component E2 5; PDC-E2 5; PDCE2 5; Flags: Precursor (At1g34430) | 2.150  |
| Cs5g16830                                                                           | K08099 chlorophyllase [EC:3.1.1.14]   (RefSeq) chlorophyllase-1, chloroplastic (A)                                                                                                                                     | Chlorophyllase-1, chloroplastic; EC=3.1.1.14; Chlorophyll-chlorophyllido hydrolase 1; Chlase 1; Flags: Precursor (At1g19670)                                                                                                                                                                                                              | 6.634  |
| Cs1g20200                                                                           | K00850 6-phosphofructokinase 1 [EC:2.7.1.11]   (RefSeq) ATP-dependent 6-phosphofructokinase 5, chloroplastic (A)                                                                                                       | ATP-dependent 6-phosphofructokinase 5, chloroplastic {ECO:0000255 HAMAP-Rule:MF_03186}; ATP-PFK 5 {ECO:0000255 HAMAP-Rule:MF_03186}; Phosphofructokinase 5 {ECO:0000255 HAMAP-Rule:MF_03186}; EC=2.7.1.11 {ECO:0000255 HAMAP-Rule:MF_03186}; Phosphohexokinase 5 {ECO:0000255 HAMAP-Rule:MF_03186}; Flags: Precursor (At2g22480)          | 1.593  |
| Cs7g13170                                                                           | K00627 pyruvate dehydrogenase E2 component (dihydrolipoamide acetyltransferase) [EC:2.3.1.12]   (RefSeq) dihydrolipoalysine-residue acetyltransferase component 4 of pyruvate dehydrogenase complex, chloroplastic (A) | Dihydrolipoalysine-residue acetyltransferase component 4 of pyruvate dehydrogenase complex, chloroplastic; EC=2.3.1.12; Dihydrolipoamide S-acetyltransferase component 4 of pyruvate dehydrogenase complex; Pyruvate                                                                                                                      | 1.902  |

|                     |                                                                                                                                                            |                                                                                                                                                                                                                                                                                                 |        |
|---------------------|------------------------------------------------------------------------------------------------------------------------------------------------------------|-------------------------------------------------------------------------------------------------------------------------------------------------------------------------------------------------------------------------------------------------------------------------------------------------|--------|
|                     |                                                                                                                                                            | dehydrogenase complex component E2 4; PDC-E2 4; PDCE2 4; pLE2; Flags: Precursor (At3g25860)                                                                                                                                                                                                     |        |
| Cs2g12650           | --                                                                                                                                                         | Endonuclease 2; Short=AtENDO2; EC=3.1.30.1; Deoxyribonuclease ENDO2; Single-stranded-nuclease endonuclease ENDO2; Flags: Precursor (At1g68290)                                                                                                                                                  | 3.424  |
| Cs2g03260           | K00162 pyruvate dehydrogenase E1 component beta subunit [EC:1.2.4.1]   (RefSeq) pyruvate dehydrogenase E1 component subunit beta-3, chloroplastic-like (A) | Pyruvate dehydrogenase E1 component subunit beta-3, chloroplastic; EC=1.2.4.1; Flags: Precursor (At2g34590)                                                                                                                                                                                     | 2.142  |
| Cs1g15840           | K00844 hexokinase [EC:2.7.1.1]   (RefSeq) hexokinase-1-like (A)                                                                                            | Hexokinase-1; EC=2.7.1.1; NtHxK1 (At4g29130)                                                                                                                                                                                                                                                    | -2.510 |
| orange1.1t0250<br>2 | K01240 uridine nucleosidase [EC:3.2.2.3]   (RefSeq) probable uridine nucleosidase 2 (A)                                                                    | Probable uridine nucleosidase 2; EC=3.2.2.3; Uridine ribohydrolase 2 (At1g05620)                                                                                                                                                                                                                | -1.646 |
| Cs7g26180           | K01689 enolase [EC:4.2.1.11]   (RefSeq) enolase 1, chloroplastic (A)                                                                                       | Enolase 1, chloroplastic; EC=4.2.1.11; 2-phospho-D-glycerate hydro-lyase 1; 2-phosphoglycerate dehydratase 1; Flags: Precursor (At1g74030)                                                                                                                                                      | 1.238  |
| Cs6g15100           | K01240 uridine nucleosidase [EC:3.2.2.3]   (RefSeq) uridine nucleosidase 1 (A)                                                                             | Uridine nucleosidase 1; EC=3.2.2.3; Uridine ribohydrolase 1 (At2g36310)                                                                                                                                                                                                                         | -1.348 |
| Cs1g15970           | K00850 6-phosphofructokinase 1 [EC:2.7.1.11]   (RefSeq) ATP-dependent 6-phosphofructokinase 3-like (A)                                                     | ATP-dependent 6-phosphofructokinase 3 {ECO:0000255 HAMAP-Rule:MF_03186}; ATP-PFK 3 {ECO:0000255 HAMAP-Rule:MF_03186}; Phosphofructokinase 3 {ECO:0000255 HAMAP-Rule:MF_03186}; EC=2.7.1.11 {ECO:0000255 HAMAP-Rule:MF_03186}; Phosphohexokinase 3 {ECO:0000255 HAMAP-Rule:MF_03186} (At4g29220) | 1.165  |
| Cs7g32500           | K01803 triosephosphate isomerase (TIM) [EC:5.3.1.1]   (RefSeq) triosephosphate isomerase, cytosolic (A)                                                    | Triosephosphate isomerase, cytosolic; TIM; Triose-phosphate isomerase; EC=5.3.1.1 (At3g55440)                                                                                                                                                                                                   | -1.019 |
| novel.818           | K00134 glyceraldehyde 3-phosphate dehydrogenase [EC:1.2.1.12]   (RefSeq) glyceraldehyde-3-phosphate dehydrogenase GAPC1, cytosolic (A)                     | Glyceraldehyde-3-phosphate dehydrogenase, cytosolic; EC=1.2.1.12; Flags: Fragment (At1g13440)                                                                                                                                                                                                   | -1.068 |
| Cs8g06950           | K00162 pyruvate dehydrogenase E1 component beta subunit [EC:1.2.4.1]   (RefSeq) pyruvate dehydrogenase E1 component subunit beta-3, chloroplastic (A)      | Pyruvate dehydrogenase E1 component subunit beta-3, chloroplastic; EC=1.2.4.1; Flags: Precursor (At2g34590)                                                                                                                                                                                     | 1.832  |
| Cs5g01270           | K00161 pyruvate dehydrogenase E1 component alpha subunit [EC:1.2.4.1]   (RefSeq) pyruvate dehydrogenase E1 component subunit alpha-3, chloroplastic (A)    | Pyruvate dehydrogenase E1 component subunit alpha-3, chloroplastic; EC=1.2.4.1; Flags: Precursor (At1g01090)                                                                                                                                                                                    | 1.356  |
| orange1.1t0189<br>2 | K01251 adenosylhomocysteinase [EC:3.3.1.1]   (RefSeq) adenosylhomocysteinase (A)                                                                           | Adenosylhomocysteinase; AdoHcyase; EC=3.3.1.1; S-adenosyl-L-homocysteine hydrolase (At4g13940)                                                                                                                                                                                                  | -1.026 |
| Cs4g18980           | K00850 6-phosphofructokinase 1 [EC:2.7.1.11]   (RefSeq) ATP-dependent 6-phosphofructokinase 6 (A)                                                          | ATP-dependent 6-phosphofructokinase 3 {ECO:0000255 HAMAP-Rule:MF_03186}; ATP-PFK 3 {ECO:0000255 HAMAP-Rule:MF_03186}; Phosphofructokinase 3 {ECO:0000255 HAMAP-Rule:MF_03186}; EC=2.7.1.11 {ECO:0000255 HAMAP-Rule:MF_03186}; Phosphohexokinase 3 {ECO:0000255 HAMAP-Rule:MF_03186} (At4g32840) | -2.038 |

|                                                                                      |                                                                                                                           |                                                                                                                                                                                                                                   |        |
|--------------------------------------------------------------------------------------|---------------------------------------------------------------------------------------------------------------------------|-----------------------------------------------------------------------------------------------------------------------------------------------------------------------------------------------------------------------------------|--------|
| orange1.1t0158<br>9                                                                  | K12581 CCR4-NOT transcription complex subunit 7/8   (RefSeq) putative CCR4-associated factor 1 homolog 8 (A)              | Putative CCR4-associated factor 1 homolog 8; EC=3.1.13.4 (At3g44240)                                                                                                                                                              | 2.335  |
| Cs3g26050                                                                            | K00844 hexokinase [EC:2.7.1.1]   (RefSeq) hexokinase-2, chloroplastic (A)                                                 | Hexokinase-2, chloroplastic; EC=2.7.1.1; NtHxK2; Flags: Precursor (At1g47840)                                                                                                                                                     | 1.128  |
| Cs3g24680                                                                            | K01520 dUTP pyrophosphatase [EC:3.6.1.23]   (RefSeq) deoxyuridine 5'-triphosphate nucleotidohydrolase (A)                 | Deoxyuridine 5'-triphosphate nucleotidohydrolase; dUTPase; EC=3.6.1.23; dUTP pyrophosphatase; dUTP-pyrophosphatase-like 1; AtDUT1 (At3g46940)                                                                                     | -1.325 |
| orange1.1t0254<br>6                                                                  | K05275 pyridoxine 4-dehydrogenase [EC:1.1.1.65]   (RefSeq) pyridoxal reductase, chloroplastic (A)                         | Pyridoxal reductase, chloroplastic; EC=1.1.1.65; Flags: Precursor (At5g53580)                                                                                                                                                     | 1.387  |
|                                                                                      |                                                                                                                           |                                                                                                                                                                                                                                   |        |
| <b><i>Senescence-associated vacuole (GO:0010282, P = 0.1108)</i></b>                 |                                                                                                                           |                                                                                                                                                                                                                                   |        |
| Cs2g15700                                                                            | K16292 KDEL-tailed cysteine endopeptidase [EC:3.4.22.-]   (RefSeq) senescence-specific cysteine protease SAG39-like (A)   | Senescence-specific cysteine protease SAG39 {ECO:0000305}; EC=3.4.22.- {ECO:0000305}; Cysteine proteinase SAG39 {ECO:0000305}; Protein SENESCENCE-ASSOCIATED GENE 39 {ECO:0000303 PubMed:20439547}; Flags: Precursor (At5g45890)  | 10.416 |
| Cs2g15480                                                                            | K16292 KDEL-tailed cysteine endopeptidase [EC:3.4.22.-]   (RefSeq) senescence-specific cysteine protease SAG39-like (A)   | Senescence-specific cysteine protease SAG39 {ECO:0000305}; EC=3.4.22.- {ECO:0000305}; Cysteine proteinase SAG39 {ECO:0000305}; Protein SENESCENCE-ASSOCIATED GENE 39 {ECO:0000250 UniProtKB:Q7XWK5}; Flags: Precursor (At5g45890) | 13.717 |
| Cs2g04940                                                                            | K16292 KDEL-tailed cysteine endopeptidase [EC:3.4.22.-]   (RefSeq) senescence-specific cysteine protease SAG39-like (A)   | Senescence-specific cysteine protease SAG39 {ECO:0000305}; EC=3.4.22.- {ECO:0000305}; Cysteine proteinase SAG39 {ECO:0000305}; Protein SENESCENCE-ASSOCIATED GENE 39 {ECO:0000250 UniProtKB:Q7XWK5}; Flags: Precursor (At5g45890) | 11.812 |
| Cs2g15490                                                                            | K16292 KDEL-tailed cysteine endopeptidase [EC:3.4.22.-]   (RefSeq) senescence-specific cysteine protease SAG39-like (A)   | Senescence-specific cysteine protease SAG39 {ECO:0000305}; EC=3.4.22.- {ECO:0000305}; Cysteine proteinase SAG39 {ECO:0000305}; Protein SENESCENCE-ASSOCIATED GENE 39 {ECO:0000250 UniProtKB:Q7XWK5}; Flags: Precursor (At5g45890) | 11.620 |
| orange1.1t0570<br>6                                                                  | K16292 KDEL-tailed cysteine endopeptidase [EC:3.4.22.-]   (RefSeq) senescence-specific cysteine protease SAG39-like (A)   | Senescence-specific cysteine protease SAG39 {ECO:0000305}; EC=3.4.22.- {ECO:0000305}; Cysteine proteinase SAG39 {ECO:0000305}; Protein SENESCENCE-ASSOCIATED GENE 39 {ECO:0000250 UniProtKB:Q7XWK5}; Flags: Precursor (At5g45890) | 7.524  |
|                                                                                      |                                                                                                                           |                                                                                                                                                                                                                                   |        |
| <b><i>Ubiquitin-dependent protein catabolic process (GO:0006511, P = 0.9999)</i></b> |                                                                                                                           |                                                                                                                                                                                                                                   |        |
| novel.1058                                                                           | K08770 ubiquitin C   (RefSeq) polyubiquitin (A)                                                                           | Polyubiquitin 3; Ubiquitin; Flags: Precursor (At5g03240)                                                                                                                                                                          | 2.857  |
| novel.1618                                                                           | --                                                                                                                        | F-box/kelch-repeat protein At3g23880 (At3g23880)                                                                                                                                                                                  | 2.980  |
| Cs6g05870                                                                            | K10664 E3 ubiquitin-protein ligase ATL6/9/15/31/42/55 [EC:2.3.2.27]   (RefSeq) E3 ubiquitin-protein ligase ATL42-like (A) | RING-H2 finger protein ATL57; EC=2.3.2.27 {ECO:0000305}; RING-type E3 ubiquitin transferase ATL57 {ECO:0000305} (At2g27940)                                                                                                       | 9.204  |

|                 |                                                                                                                                  |                                                                                                                                                                                                              |        |
|-----------------|----------------------------------------------------------------------------------------------------------------------------------|--------------------------------------------------------------------------------------------------------------------------------------------------------------------------------------------------------------|--------|
| novel.29        | K19040 E3 ubiquitin-protein ligase ATL10/75/76/77/78 [EC:2.3.2.27]   (RefSeq) RING-H2 finger protein ATL78 (A)                   | RING-H2 finger protein ATL78; EC=2.3.2.27 {ECO:0000305}; RING-type E3 ubiquitin transferase ATL78 {ECO:0000305} (At1g49230)                                                                                  | 2.864  |
| Cs7g28960       | K19038 E3 ubiquitin-protein ligase ATL41 [EC:2.3.2.27]   (RefSeq) E3 ubiquitin-protein ligase ATL41-like (A)                     | RING-H2 finger protein ATL52; EC=2.3.2.27 {ECO:0000305}; RING-type E3 ubiquitin transferase ATL52 {ECO:0000305} (At5g17600)                                                                                  | 4.216  |
| Cs5g34810       | --                                                                                                                               | F-box/kelch-repeat protein At3g24760 (At3g24760)                                                                                                                                                             | 1.420  |
| Cs7g28430       | K03094 S-phase kinase-associated protein 1   (RefSeq) SKP1-like protein 1A (A)                                                   | SKP1-like protein 4; AtSK4; (At1g20140)                                                                                                                                                                      | 7.601  |
| Cs2g06115       | K10666 E3 ubiquitin-protein ligase RNF5 [EC:2.3.2.27]   (RefSeq) E3 ubiquitin-protein ligase RMA1H1 (A)                          | E3 ubiquitin-protein ligase RMA1H1; EC=2.3.2.27; Protein RING membrane-anchor 1 homolog 1; RING-type E3 ubiquitin transferase RMA1H1 {ECO:0000305} (At4g27470)                                               | -1.106 |
| Cs2g30000       | K19045 E3 ubiquitin-protein ligase BIG BROTHER and related proteins [EC:2.3.2.27]   (RefSeq) E3 ubiquitin ligase BIG BROTHER (A) | E3 ubiquitin ligase BIG BROTHER; EC=2.3.2.27 {ECO:0000269 PubMed:16461280, ECO:0000269 PubMed:18483219}; Protein ENHANCER OF DA1-1; RING-type E3 ubiquitin transferase BIG BROTHER {ECO:0000305} (At3g19910) | -1.097 |
| Cs5g02260       | K19040 E3 ubiquitin-protein ligase ATL10/75/76/77/78 [EC:2.3.2.27]   (RefSeq) E3 ubiquitin-protein ligase ATL76-like (A)         | Putative RING-H2 finger protein ATL21A; EC=2.3.2.27 {ECO:0000305}; RING-type E3 ubiquitin transferase ATL21A {ECO:0000305}; Flags: Precursor (At5g07040)                                                     | 1.053  |
| Cs7g15630       | K10664 E3 ubiquitin-protein ligase ATL6/9/15/31/42/55 [EC:2.3.2.27]   (RefSeq) E3 ubiquitin-protein ligase ATL42-like (A)        | RING-H2 finger protein ATL51; EC=2.3.2.27 {ECO:0000305}; RING-type E3 ubiquitin transferase ATL51 {ECO:0000305} (At3g03550)                                                                                  | -1.995 |
| Cs4g06540       | K16281 RING-H2 zinc finger protein RHA1   (RefSeq) E3 ubiquitin-protein ligase RHA1B (A)                                         | RING-H2 finger protein ATL11; EC=2.3.2.27 {ECO:0000305}; RING-type E3 ubiquitin transferase ATL11 {ECO:0000305}; Flags: Precursor (At5g20880_1)                                                              | -1.041 |
| orange1.1t02216 | K04506 E3 ubiquitin-protein ligase SIAH1 [EC:2.3.2.27]   (RefSeq) E3 ubiquitin-protein ligase SINAT2 (A)                         | E3 ubiquitin-protein ligase SINAT2 {ECO:0000305}; EC=2.3.2.27 {ECO:0000269 PubMed:28351989}; RING-type E3 ubiquitin transferase SINAT2 {ECO:0000305}; Seven in absentia homolog 2 {ECO:0000305} (At3g58040)  | 1.092  |
| Cs6g16440       | K13148 integrator complex subunit 11 [EC:3.1.27.-]   (RefSeq) cleavage and polyadenylation specificity factor subunit 3-II (A)   | E3 ubiquitin-protein ligase At4g11680; EC=2.3.2.27; RING finger protein At4g11680; RING-type E3 ubiquitin transferase At4g11680 {ECO:0000305} (At1g68070)                                                    | -1.323 |
| Cs3g27870       | K19040 E3 ubiquitin-protein ligase ATL10/75/76/77/78 [EC:2.3.2.27]   (RefSeq) RING-H2 finger protein ATL74 (A)                   | RING-H2 finger protein ATL80; EC=2.3.2.27 {ECO:0000305}; RING-type E3 ubiquitin transferase ATL80 {ECO:0000305} (At1g20823)                                                                                  | -1.213 |
| novel.139       | K19037 E3 ubiquitin-protein ligase ATL23 [EC:2.3.2.27]   (RefSeq) E3 ubiquitin-protein ligase ATL23 (A)                          | E3 ubiquitin-protein ligase Os04g0590900; EC=2.3.2.27 {ECO:0000250 UniProtKB:Q9SLC3}; RING-H2 finger protein Os04g0590900; RING-type E3 ubiquitin transferase Os04g0590900 {ECO:0000305} (At1g49230)         | 2.415  |
| novel.8         | K16281 RING-H2 zinc finger protein RHA1   (RefSeq) E3 ubiquitin-protein ligase RHA1B (A)                                         | E3 ubiquitin-protein ligase RHA2A {ECO:0000305}; EC=2.3.2.27; RING-H2 finger A2a {ECO:0000303 PubMed:9781696}; RING-H2 zinc finger protein                                                                   | 1.086  |

|                 |                                                                                                                                             |                                                                                                                                                                                                                                                                             |        |
|-----------------|---------------------------------------------------------------------------------------------------------------------------------------------|-----------------------------------------------------------------------------------------------------------------------------------------------------------------------------------------------------------------------------------------------------------------------------|--------|
|                 |                                                                                                                                             | RHA2a {ECO:0000305}; RING-type E3 ubiquitin transferase RHA2A {ECO:0000305} (At1g15100)                                                                                                                                                                                     |        |
| orange1.1t01521 | K10664 E3 ubiquitin-protein ligase ATL6/9/15/31/42/55 [EC:2.3.2.27]   (RefSeq) E3 ubiquitin-protein ligase ATL6-like (A)                    | RING-H2 finger protein ATL38; EC=2.3.2.27 {ECO:0000305}; RING-type E3 ubiquitin transferase ATL38 {ECO:0000305} (At2g34990)                                                                                                                                                 | -1.275 |
| Cs7g30200       | K10523 speckle-type POZ protein   (RefSeq) BTB/POZ domain-containing protein At3g56230-like (A)                                             | BTB/POZ domain-containing protein At3g56230 (At3g56230)                                                                                                                                                                                                                     | -1.902 |
| Cs2g21130       | K19042 E3 ubiquitin-protein ligase BOI and related proteins [EC:2.3.2.27]   (RefSeq) probable BOI-related E3 ubiquitin-protein ligase 2 (A) | Probable BOI-related E3 ubiquitin-protein ligase 2; EC=2.3.2.27 {ECO:0000250 UniProtKB:Q9FHE4}; RING-type E3 ubiquitin transferase BRG2 {ECO:0000305} (At1g10650)                                                                                                           | 3.550  |
| Cs5g10280       | --                                                                                                                                          | BAG family molecular chaperone regulator 1; Bcl-2-associated athanogene 1 (At5g52060)                                                                                                                                                                                       | 1.197  |
| novel.1931      | --                                                                                                                                          | BTB/POZ and TAZ domain-containing protein 3; BTB and TAZ domain protein 3 (At1g05690)                                                                                                                                                                                       | -1.468 |
| Cs2g13390       | K16282 E3 ubiquitin-protein ligase RHA2 [EC:2.3.2.27]   (RefSeq) E3 ubiquitin-protein ligase RHA2A (A)                                      | E3 ubiquitin-protein ligase RHA2A {ECO:0000305}; EC=2.3.2.27; RING-H2 finger A2a {ECO:0000303 PubMed:9781696}; RING-H2 zinc finger protein RHA2a {ECO:0000305}; RING-type E3 ubiquitin transferase RHA2A {ECO:0000305} (At1g15100)                                          | -1.089 |
| Cs9g10700       | K19041 E3 ubiquitin-protein ligase RNF38/44 [EC:2.3.2.27]   (RefSeq) RING-H2 finger protein ATL16 (A)                                       | RING-H2 finger protein ATL1; EC=2.3.2.27 {ECO:0000305}; RING-type E3 ubiquitin transferase ATL1 {ECO:0000305} (At1g04360)                                                                                                                                                   | -1.883 |
| Cs5g30360       | --                                                                                                                                          | F-box/LRR-repeat protein 17; F-box-like protein 17 (At3g54650)                                                                                                                                                                                                              | -1.562 |
| orange1.1t05195 | K10664 E3 ubiquitin-protein ligase ATL6/9/15/31/42/55 [EC:2.3.2.27]   (RefSeq) E3 ubiquitin-protein ligase ATL42-like (A)                   | RING-H2 finger protein ATL33; EC=2.3.2.27 {ECO:0000305}; RING-type E3 ubiquitin transferase ATL33 {ECO:0000305} (At2g37580 1)                                                                                                                                               | -1.184 |
| Cs2g19610       | --                                                                                                                                          | F-box protein SNE; Protein SNEEZY; Sleepy protein 2 (At5g48170)                                                                                                                                                                                                             | 1.966  |
| Cs8g20100       | K03320 ammonium transporter, Amt family   (RefSeq) LOW QUALITY PROTEIN: ammonium transporter 1 member 2 (A)                                 | E3 ubiquitin-protein ligase AIRP2 {ECO:0000305}; EC=2.3.2.27 {ECO:0000269 PubMed:21969385}; Protein ABA INSENSITIVE RING PROTEIN 2 {ECO:0000303 PubMed:21969385}; AtAIRP2 {ECO:0000303 PubMed:21969385}; RING-type E3 ubiquitin transferase AIRP2 {ECO:0000305} (At3g47160) | -1.285 |
| Cs1g21740       | K04498 E1A/CREB-binding protein [EC:2.3.1.48]   (RefSeq) histone acetyltransferase HAC1-like (A)                                            | BTB/POZ and TAZ domain-containing protein 4; BTB and TAZ domain protein 4 (At5g67480)                                                                                                                                                                                       | 1.117  |
| Cs5g03280       | K16281 RING-H2 zinc finger protein RHA1   (RefSeq) E3 ubiquitin-protein ligase RHA1B (A)                                                    | E3 ubiquitin-protein ligase RHA1B {ECO:0000305}; EC=2.3.2.27; RING-H2 finger A1b {ECO:0000303 PubMed:9781696}; RING-H2 zinc finger protein RHA1b {ECO:0000305}; RING-type E3 ubiquitin transferase RHA1B {ECO:0000305} (At3g61460)                                          | -1.015 |
| Cs6g21270       | K10661 E3 ubiquitin-protein ligase MARCH6 [EC:2.3.2.27]   (RefSeq) probable E3 ubiquitin ligase SUD1 (A)                                    | Probable E3 ubiquitin ligase SUD1; EC=2.3.2.27; Protein ECERIFERUM 9; Protein SUPPRESSOR OF DRY2 DEFFECTS 1; AtSUD1; RING-type E3                                                                                                                                           | 2.917  |

|                                                                                                          |                                                                                                                                             |                                                                                                                                                                                                              |        |
|----------------------------------------------------------------------------------------------------------|---------------------------------------------------------------------------------------------------------------------------------------------|--------------------------------------------------------------------------------------------------------------------------------------------------------------------------------------------------------------|--------|
|                                                                                                          |                                                                                                                                             | ubiquitin transferase SUD1 {ECO:0000305}; RING/U-box domain-containing protein (At2g02960)                                                                                                                   |        |
| Cs9g18010                                                                                                | K10664 E3 ubiquitin-protein ligase ATL6/9/15/31/42/55 [EC:2.3.2.27]   (RefSeq) RING-H2 finger protein ATL11-like (A)                        | Putative RING-H2 finger protein ATL21A; EC=2.3.2.27 {ECO:0000305}; RING-type E3 ubiquitin transferase ATL21A {ECO:0000305}; Flags: Precursor (At5g53110)                                                     | 1.591  |
| novel.1603                                                                                               | --                                                                                                                                          | F-box/kelch-repeat protein At1g15670 (At1g15670)                                                                                                                                                             | -1.683 |
| Cs3g16050                                                                                                | --                                                                                                                                          | F-box/kelch-repeat protein At5g43190 (At5g43190)                                                                                                                                                             | -1.042 |
| novel.2234                                                                                               | --                                                                                                                                          | BTB/POZ and TAZ domain-containing protein 3; BTB and TAZ domain protein 3 (At1g05690)                                                                                                                        | -2.231 |
| Cs2g15840                                                                                                | K19038 E3 ubiquitin-protein ligase ATL41 [EC:2.3.2.27]   (RefSeq) E3 ubiquitin-protein ligase ATL41-like (A)                                | E3 ubiquitin-protein ligase ATL41; EC=2.3.2.27 {ECO:0000269 PubMed:15644464, ECO:0000269 PubMed:16339806}; RING-H2 finger protein ATL41; RING-type E3 ubiquitin transferase ATL41 {ECO:0000305} (At2g42360)  | -1.500 |
| Cs3g26440                                                                                                | K19042 E3 ubiquitin-protein ligase BOI and related proteins [EC:2.3.2.27]   (RefSeq) probable BOI-related E3 ubiquitin-protein ligase 2 (A) | BOI-related E3 ubiquitin-protein ligase 1; EC=2.3.2.27 {ECO:0000269 PubMed:20921156}; RING-type E3 ubiquitin transferase BRG1 {ECO:0000305} (At4g35070)                                                      | -1.122 |
| <b><i>Proteasome-mediated ubiquitin-dependent protein catabolic process (GO:0043161, P = 0.9781)</i></b> |                                                                                                                                             |                                                                                                                                                                                                              |        |
| novel.1618                                                                                               | --                                                                                                                                          | F-box/kelch-repeat protein At3g23880 (At3g23880)                                                                                                                                                             | 2.980  |
| Cs6g05870                                                                                                | K10664 E3 ubiquitin-protein ligase ATL6/9/15/31/42/55 [EC:2.3.2.27]   (RefSeq) E3 ubiquitin-protein ligase ATL42-like (A)                   | RING-H2 finger protein ATL57; EC=2.3.2.27 {ECO:0000305}; RING-type E3 ubiquitin transferase ATL57 {ECO:0000305} (At2g27940)                                                                                  | 9.204  |
| novel.29                                                                                                 | K19040 E3 ubiquitin-protein ligase ATL10/75/76/77/78 [EC:2.3.2.27]   (RefSeq) RING-H2 finger protein ATL78 (A)                              | RING-H2 finger protein ATL78; EC=2.3.2.27 {ECO:0000305}; RING-type E3 ubiquitin transferase ATL78 {ECO:0000305} (At1g49230)                                                                                  | 2.864  |
| Cs7g28960                                                                                                | K19038 E3 ubiquitin-protein ligase ATL41 [EC:2.3.2.27]   (RefSeq) E3 ubiquitin-protein ligase ATL41-like (A)                                | RING-H2 finger protein ATL52; EC=2.3.2.27 {ECO:0000305}; RING-type E3 ubiquitin transferase ATL52 {ECO:0000305} (At5g17600)                                                                                  | 4.216  |
| Cs5g34810                                                                                                | --                                                                                                                                          | F-box/kelch-repeat protein At3g24760 (At3g24760)                                                                                                                                                             | 1.420  |
| Cs2g06115                                                                                                | K10666 E3 ubiquitin-protein ligase RNF5 [EC:2.3.2.27]   (RefSeq) E3 ubiquitin-protein ligase RMA1H1 (A)                                     | E3 ubiquitin-protein ligase RMA1H1; EC=2.3.2.27; Protein RING membrane-anchor 1 homolog 1; RING-type E3 ubiquitin transferase RMA1H1 {ECO:0000305} (At4g27470)                                               | -1.106 |
| Cs2g30000                                                                                                | K19045 E3 ubiquitin-protein ligase BIG BROTHER and related proteins [EC:2.3.2.27]   (RefSeq) E3 ubiquitin ligase BIG BROTHER (A)            | E3 ubiquitin ligase BIG BROTHER; EC=2.3.2.27 {ECO:0000269 PubMed:16461280, ECO:0000269 PubMed:18483219}; Protein ENHANCER OF DA1-1; RING-type E3 ubiquitin transferase BIG BROTHER {ECO:0000305} (At3g19910) | -1.097 |
| Cs5g02260                                                                                                | K19040 E3 ubiquitin-protein ligase ATL10/75/76/77/78 [EC:2.3.2.27]   (RefSeq) E3 ubiquitin-protein ligase ATL76-like (A)                    | Putative RING-H2 finger protein ATL21A; EC=2.3.2.27 {ECO:0000305}; RING-type E3 ubiquitin transferase ATL21A {ECO:0000305}; Flags: Precursor (At5g07040)                                                     | 1.053  |

|                 |                                                                                                                                             |                                                                                                                                                                                                                                    |        |
|-----------------|---------------------------------------------------------------------------------------------------------------------------------------------|------------------------------------------------------------------------------------------------------------------------------------------------------------------------------------------------------------------------------------|--------|
| Cs7g15630       | K10664 E3 ubiquitin-protein ligase ATL6/9/15/31/42/55 [EC:2.3.2.27]   (RefSeq) E3 ubiquitin-protein ligase ATL42-like (A)                   | RING-H2 finger protein ATL51; EC=2.3.2.27 {ECO:0000305}; RING-type E3 ubiquitin transferase ATL51 {ECO:0000305} (At3g03550)                                                                                                        | -1.995 |
| Cs4g06540       | K16281 RING-H2 zinc finger protein RHA1   (RefSeq) E3 ubiquitin-protein ligase RHA1B (A)                                                    | RING-H2 finger protein ATL11; EC=2.3.2.27 {ECO:0000305}; RING-type E3 ubiquitin transferase ATL11 {ECO:0000305}; Flags: Precursor (At5g20880 1)                                                                                    | -1.041 |
| Cs6g16440       | K13148 integrator complex subunit 11 [EC:3.1.27.-]   (RefSeq) cleavage and polyadenylation specificity factor subunit 3-II (A)              | E3 ubiquitin-protein ligase At4g11680; EC=2.3.2.27; RING finger protein At4g11680; RING-type E3 ubiquitin transferase At4g11680 {ECO:0000305} (At1g68070)                                                                          | -1.323 |
| Cs3g27870       | K19040 E3 ubiquitin-protein ligase ATL10/75/76/77/78 [EC:2.3.2.27]   (RefSeq) RING-H2 finger protein ATL74 (A)                              | RING-H2 finger protein ATL80; EC=2.3.2.27 {ECO:0000305}; RING-type E3 ubiquitin transferase ATL80 {ECO:0000305} (At1g20823)                                                                                                        | -1.213 |
| novel.139       | K19037 E3 ubiquitin-protein ligase ATL23 [EC:2.3.2.27]   (RefSeq) E3 ubiquitin-protein ligase ATL23 (A)                                     | E3 ubiquitin-protein ligase Os04g0590900; EC=2.3.2.27 {ECO:0000250 UniProtKB:Q9SLC3}; RING-H2 finger protein Os04g0590900; RING-type E3 ubiquitin transferase Os04g0590900 {ECO:0000305} (At1g49230)                               | 2.415  |
| novel.8         | K16281 RING-H2 zinc finger protein RHA1   (RefSeq) E3 ubiquitin-protein ligase RHA1B (A)                                                    | E3 ubiquitin-protein ligase RHA2A {ECO:0000305}; EC=2.3.2.27; RING-H2 finger A2a {ECO:0000303 PubMed:9781696}; RING-H2 zinc finger protein RHA2a {ECO:0000305}; RING-type E3 ubiquitin transferase RHA2A {ECO:0000305} (At1g15100) | 1.086  |
| orange1.1t01521 | K10664 E3 ubiquitin-protein ligase ATL6/9/15/31/42/55 [EC:2.3.2.27]   (RefSeq) E3 ubiquitin-protein ligase ATL6-like (A)                    | RING-H2 finger protein ATL38; EC=2.3.2.27 {ECO:0000305}; RING-type E3 ubiquitin transferase ATL38 {ECO:0000305} (At2g34990)                                                                                                        | -1.275 |
| Cs7g30200       | K10523 speckle-type POZ protein   (RefSeq) BTB/POZ domain-containing protein At3g56230-like (A)                                             | BTB/POZ domain-containing protein At3g56230 (At3g56230)                                                                                                                                                                            | -1.902 |
| Cs2g21130       | K19042 E3 ubiquitin-protein ligase BOI and related proteins [EC:2.3.2.27]   (RefSeq) probable BOI-related E3 ubiquitin-protein ligase 2 (A) | Probable BOI-related E3 ubiquitin-protein ligase 2; EC=2.3.2.27 {ECO:0000250 UniProtKB:Q9FHE4}; RING-type E3 ubiquitin transferase BRG2 {ECO:0000305} (At1g10650)                                                                  | 3.550  |
| Cs5g10280       | --                                                                                                                                          | BAG family molecular chaperone regulator 1; Bcl-2-associated athanogene 1 (At5g52060)                                                                                                                                              | 1.197  |
| novel.1931      | --                                                                                                                                          | BTB/POZ and TAZ domain-containing protein 3; BTB and TAZ domain protein 3 (At1g05690)                                                                                                                                              | -1.468 |
| Cs2g13390       | K16282 E3 ubiquitin-protein ligase RHA2 [EC:2.3.2.27]   (RefSeq) E3 ubiquitin-protein ligase RHA2A (A)                                      | E3 ubiquitin-protein ligase RHA2A {ECO:0000305}; EC=2.3.2.27; RING-H2 finger A2a {ECO:0000303 PubMed:9781696}; RING-H2 zinc finger protein RHA2a {ECO:0000305}; RING-type E3 ubiquitin transferase RHA2A {ECO:0000305} (At1g15100) | -1.089 |
| Cs9g10700       | K19041 E3 ubiquitin-protein ligase RNF38/44 [EC:2.3.2.27]   (RefSeq) RING-H2 finger protein ATL16 (A)                                       | RING-H2 finger protein ATL1; EC=2.3.2.27 {ECO:0000305}; RING-type E3 ubiquitin transferase ATL1 {ECO:0000305} (At1g04360)                                                                                                          | -1.883 |
| Cs5g30360       | --                                                                                                                                          | F-box/LRR-repeat protein 17; F-box-like protein 17 (At3g54650)                                                                                                                                                                     | -1.562 |
| orange1.1t05195 | K10664 E3 ubiquitin-protein ligase ATL6/9/15/31/42/55 [EC:2.3.2.27]   (RefSeq) E3 ubiquitin-protein ligase ATL42-like (A)                   | RING-H2 finger protein ATL33; EC=2.3.2.27 {ECO:0000305}; RING-type E3 ubiquitin transferase ATL33 {ECO:0000305} (At2g37580 1)                                                                                                      | -1.184 |

|                                                        |                                                                                                                                             |                                                                                                                                                                                                                                    |        |
|--------------------------------------------------------|---------------------------------------------------------------------------------------------------------------------------------------------|------------------------------------------------------------------------------------------------------------------------------------------------------------------------------------------------------------------------------------|--------|
| Cs2g19610                                              | --                                                                                                                                          | F-box protein SNE; Protein SNEEZY; Sleepy protein 2 (At5g48170)                                                                                                                                                                    | 1.966  |
| Cs1g21740                                              | K04498 E1A/CREB-binding protein [EC:2.3.1.48]   (RefSeq) histone acetyltransferase HAC1-like (A)                                            | BTB/POZ and TAZ domain-containing protein 4; BTB and TAZ domain protein 4 (At5g67480)                                                                                                                                              | 1.117  |
| Cs5g03280                                              | K16281 RING-H2 zinc finger protein RHA1   (RefSeq) E3 ubiquitin-protein ligase RHA1B (A)                                                    | E3 ubiquitin-protein ligase RHA1B {ECO:0000305}; EC=2.3.2.27; RING-H2 finger A1b {ECO:0000303 PubMed:9781696}; RING-H2 zinc finger protein RHA1b {ECO:0000305}; RING-type E3 ubiquitin transferase RHA1B {ECO:0000305} (At3g61460) | -1.015 |
| Cs6g21270                                              | K10661 E3 ubiquitin-protein ligase MARCH6 [EC:2.3.2.27]   (RefSeq) probable E3 ubiquitin ligase SUD1 (A)                                    | Probable E3 ubiquitin ligase SUD1; EC=2.3.2.27; Protein ECERIFERUM 9; Protein SUPPRESSOR OF DRY2 DEFECTS 1; AtSUD1; RING-type E3 ubiquitin transferase SUD1 {ECO:0000305}; RING/U-box domain-containing protein (At2g02960)        | 2.917  |
| Cs9g18010                                              | K10664 E3 ubiquitin-protein ligase ATL6/9/15/31/42/55 [EC:2.3.2.27]   (RefSeq) RING-H2 finger protein ATL11-like (A)                        | Putative RING-H2 finger protein ATL21A; EC=2.3.2.27 {ECO:0000305}; RING-type E3 ubiquitin transferase ATL21A {ECO:0000305}; Flags: Precursor (At5g53110)                                                                           | 1.591  |
| novel.1603                                             | --                                                                                                                                          | F-box/kelch-repeat protein At1g15670 (At1g15670)                                                                                                                                                                                   | -1.683 |
| Cs3g16050                                              | --                                                                                                                                          | F-box/kelch-repeat protein At5g43190 (At5g43190)                                                                                                                                                                                   | -1.042 |
| novel.2234                                             | --                                                                                                                                          | BTB/POZ and TAZ domain-containing protein 3; BTB and TAZ domain protein 3 (At1g05690)                                                                                                                                              | -2.231 |
| Cs2g15840                                              | K19038 E3 ubiquitin-protein ligase ATL41 [EC:2.3.2.27]   (RefSeq) E3 ubiquitin-protein ligase ATL41-like (A)                                | E3 ubiquitin-protein ligase ATL41; EC=2.3.2.27 {ECO:0000269 PubMed:15644464, ECO:0000269 PubMed:16339806}; RING-H2 finger protein ATL41; RING-type E3 ubiquitin transferase ATL41 {ECO:0000305} (At2g42360)                        | -1.500 |
| Cs3g26440                                              | K19042 E3 ubiquitin-protein ligase BOI and related proteins [EC:2.3.2.27]   (RefSeq) probable BOI-related E3 ubiquitin-protein ligase 2 (A) | BOI-related E3 ubiquitin-protein ligase 1; EC=2.3.2.27 {ECO:0000269 PubMed:20921156}; RING-type E3 ubiquitin transferase BRG1 {ECO:0000305} (At4g35070)                                                                            | -1.122 |
| <b>Autophagy (GO:0006914, P = 0.9998)</b>              |                                                                                                                                             |                                                                                                                                                                                                                                    |        |
| orange1.1t02216                                        | K04506 E3 ubiquitin-protein ligase SIAH1 [EC:2.3.2.27]   (RefSeq) E3 ubiquitin-protein ligase SINAT2 (A)                                    | E3 ubiquitin-protein ligase SINAT2 {ECO:0000305}; EC=2.3.2.27 {ECO:0000269 PubMed:28351989}; RING-type E3 ubiquitin transferase SINAT2 {ECO:0000305}; Seven in absentia homolog 2 {ECO:0000305} (At3g58040)                        | 1.092  |
| <b>Protein ubiquitination (GO:0016567, P = 0.9964)</b> |                                                                                                                                             |                                                                                                                                                                                                                                    |        |
| Cs7g05010                                              | --                                                                                                                                          | U-box domain-containing protein 11; EC=2.3.2.27; Plant U-box protein 11; RING-type E3 ubiquitin transferase PUB11 {ECO:0000305} (At1g23030)                                                                                        | 7.858  |

|                 |                                                                                                                                                 |                                                                                                                                                                                                                                    |        |
|-----------------|-------------------------------------------------------------------------------------------------------------------------------------------------|------------------------------------------------------------------------------------------------------------------------------------------------------------------------------------------------------------------------------------|--------|
| Cs5g33100       | K16275 E3 ubiquitin-protein ligase BAH [EC:2.3.2.27]   (RefSeq) probable E3 ubiquitin-protein ligase BAH1-like 1 (A)                            | Probable E3 ubiquitin-protein ligase BAH1-like 1; EC=2.3.2.27 {ECO:0000305}; RING-type E3 ubiquitin transferase BAH1-like 1 {ECO:0000305} (At1g02860)                                                                              | 2,221  |
| Cs1g21770       | --                                                                                                                                              | RBTB/POZ domain-containing protein NPY2; Protein NAKED PINS IN YUC MUTANTS 2 (At2g14820)                                                                                                                                           | -1.155 |
| Cs7g07200       | --                                                                                                                                              | F-box protein AFR; Protein ATTENUATED FAR-RED RESPONSE; SKP1-interacting partner 29 (At2g24540)                                                                                                                                    | -2.747 |
| Cs2g23560       | K10695 E3 ubiquitin-protein ligase RNF1/2 [EC:2.3.2.27]   (RefSeq) putative E3 ubiquitin-protein ligase RING1a (A)                              | Putative E3 ubiquitin-protein ligase RING1a; EC=2.3.2.27; Polycomb complex protein RING1a; Protein RING1a; AtRING1a; RING-type E3 ubiquitin transferase RING1a {ECO:0000305}; Ring finger protein 434 (At5g44280)                  | 1.011  |
| Cs7g28430       | K03094 S-phase kinase-associated protein 1   (RefSeq) SKP1-like protein 1A (A)                                                                  | SKP1-like protein 4; AtSK4; (At1g20140)                                                                                                                                                                                            | 7.601  |
| Cs1g10740       | K06694 26S proteasome non-ATPase regulatory subunit 10   (RefSeq) 26S proteasome non-ATPase regulatory subunit 10 (A)                           | Protein ACCELERATED CELL DEATH 6 {ECO:0000303 PubMed:10488236} (At1g03670)                                                                                                                                                         | 2.083  |
| Cs7g10560       | --                                                                                                                                              | F-box/kelch-repeat protein At1g67480 (At1g67480)                                                                                                                                                                                   | -1.174 |
| Cs2g06115       | K10666 E3 ubiquitin-protein ligase RNF5 [EC:2.3.2.27]   (RefSeq) E3 ubiquitin-protein ligase RMA1H1 (A)                                         | E3 ubiquitin-protein ligase RMA1H1; EC=2.3.2.27; Protein RING membrane-anchor 1 homolog 1; RING-type E3 ubiquitin transferase RMA1H1 {ECO:0000305} (At4g27470)                                                                     | -1.106 |
| Cs2g30000       | K19045 E3 ubiquitin-protein ligase BIG BROTHER and related proteins [EC:2.3.2.27]   (RefSeq) E3 ubiquitin ligase BIG BROTHER (A)                | E3 ubiquitin ligase BIG BROTHER; EC=2.3.2.27 {ECO:0000269 PubMed:16461280, ECO:0000269 PubMed:18483219}; Protein ENHANCER OF DA1-1; RING-type E3 ubiquitin transferase BIG BROTHER {ECO:0000305} (At3g19910)                       | -1.097 |
| Cs8g20570       | K09667 protein O-GlcNAc transferase [EC:2.4.1.255]   (RefSeq) probable UDP-N-acetylglucosamine--peptide N-acetylglucosaminyltransferase SEC (A) | Ethylene-overproduction protein 1; Protein ETHYLENE OVERPRODUCER 1; Protein ETO1 (At3g51770)                                                                                                                                       | -1.787 |
| orange1.1t02216 | K04506 E3 ubiquitin-protein ligase SIAH1 [EC:2.3.2.27]   (RefSeq) E3 ubiquitin-protein ligase SINAT2 (A)                                        | E3 ubiquitin-protein ligase SINAT2 {ECO:0000305}; EC=2.3.2.27 {ECO:0000269 PubMed:28351989}; RING-type E3 ubiquitin transferase SINAT2 {ECO:0000305}; Seven in absentia homolog 2 {ECO:0000305} (At3g58040)                        | 1.092  |
| novel.397       | --                                                                                                                                              | F-box/kelch-repeat protein At5g26960 (At5g26960)                                                                                                                                                                                   | -1.029 |
| novel.139       | K19037 E3 ubiquitin-protein ligase ATL23 [EC:2.3.2.27]   (RefSeq) E3 ubiquitin-protein ligase ATL23 (A)                                         | E3 ubiquitin-protein ligase Os04g0590900; EC=2.3.2.27 {ECO:0000250 UniProtKB:Q9SLC3}; RING-H2 finger protein Os04g0590900; RING-type E3 ubiquitin transferase Os04g0590900 {ECO:0000305} (At1g49230)                               | 2.415  |
| novel.8         | K16281 RING-H2 zinc finger protein RHA1   (RefSeq) E3 ubiquitin-protein ligase RHA1B (A)                                                        | E3 ubiquitin-protein ligase RHA2A {ECO:0000305}; EC=2.3.2.27; RING-H2 finger A2a {ECO:0000303 PubMed:9781696}; RING-H2 zinc finger protein RHA2a {ECO:0000305}; RING-type E3 ubiquitin transferase RHA2A {ECO:0000305} (At1g15100) | 1.086  |

|                 |                                                                                                              |                                                                                                                                                                                                                                             |        |
|-----------------|--------------------------------------------------------------------------------------------------------------|---------------------------------------------------------------------------------------------------------------------------------------------------------------------------------------------------------------------------------------------|--------|
| orange1.1t00304 | --                                                                                                           | F-box protein PP2-A13; Protein PHLOEM PROTEIN 2-LIKE A13; AtPP2-A13; SKP1-interacting partner 9 (At3g61060)                                                                                                                                 | -1.558 |
| Cs5g32610       | --                                                                                                           | BTB/POZ domain-containing protein At1g03010 (At1g03010)                                                                                                                                                                                     | -2.352 |
| Cs1g05780       | --                                                                                                           | BTB/POZ domain-containing protein At2g13690; Protein PRL1-interacting factor G (At2g13690)                                                                                                                                                  | 1.307  |
| orange1.1t04176 | --                                                                                                           | F-box protein PP2-B10; Protein PHLOEM PROTEIN 2-LIKE B10; AtPP2-B10 (At2g02360)                                                                                                                                                             | -1.695 |
| novel.531       | K21931 gamma-terpinene synthase [EC:4.2.3.114]   (RefSeq) gamma-terpinene synthase, chloroplastic-like (A)   | F-box/kelch-repeat protein At5g42360 (At5g42360)                                                                                                                                                                                            | 1.404  |
| Cs5g01950       | K19039 E3 ubiquitin-protein ligase ATL7/58/59 [EC:2.3.2.27]   (RefSeq) RING-H2 zinc finger protein RHA4a (A) | Probable E3 ubiquitin-protein ligase RHA4A {ECO:0000305}; EC=2.3.2.27; RING-H2 finger A4a {ECO:0000303 PubMed:9781696}; RING-H2 zinc finger protein RHA4a {ECO:0000305}; RING-type E3 ubiquitin transferase RHA4A {ECO:0000305} (At4g10150) | 1.907  |
| Cs1g23530       | --                                                                                                           | BTB/POZ domain-containing protein At3g50780 (At3g50780)                                                                                                                                                                                     | -1.074 |
| Cs3g09510       | --                                                                                                           | F-box/kelch-repeat protein SKIP25; SKP1-interacting partner 25 (At1g31350)                                                                                                                                                                  | -1.315 |
| Cs8g04290       | --                                                                                                           | BTB/POZ domain-containing protein NPY2; Protein NAKED PINS IN YUC MUTANTS 2 (At2g14820)                                                                                                                                                     | -1.410 |
| Cs7g06410       | --                                                                                                           | BTB/POZ domain-containing protein NPY1; Protein ENHANCER OF PINOID; Protein MACCHI-BOU 4; Protein NAKED PINS IN YUC MUTANTS 1 (At4g31820)                                                                                                   | -1.259 |
| Cs2g13390       | K16282 E3 ubiquitin-protein ligase RHA2 [EC:2.3.2.27]   (RefSeq) E3 ubiquitin-protein ligase RHA2A (A)       | E3 ubiquitin-protein ligase RHA2A {ECO:0000305}; EC=2.3.2.27; RING-H2 finger A2a {ECO:0000303 PubMed:9781696}; RING-H2 zinc finger protein RHA2a {ECO:0000305}; RING-type E3 ubiquitin transferase RHA2A {ECO:0000305} (At1g15100)          | -1.089 |
| novel.396       | --                                                                                                           | F-box/kelch-repeat protein At5g26960 (At5g26960)                                                                                                                                                                                            | -1.248 |
| Cs5g18990       | K19039 E3 ubiquitin-protein ligase ATL7/58/59 [EC:2.3.2.27]   (RefSeq) RING-H2 finger protein ATL7-like (A)  | RING-H2 finger protein ATL7; EC=2.3.2.27 {ECO:0000305}; RING-type E3 ubiquitin transferase ATL7 {ECO:0000305} (At4g10150)                                                                                                                   | -1.275 |
| Cs5g31260       | K15042 importin subunit alpha-6/7   (RefSeq) importin subunit alpha-2-like (A)                               | ARM REPEAT PROTEIN INTERACTING WITH ABF2; ARIA (At5g13060)                                                                                                                                                                                  | -1.335 |
| Cs5g30360       | --                                                                                                           | F-box/LRR-repeat protein 17; F-box-like protein 17 (At3g54650)                                                                                                                                                                              | -1.562 |
| Cs2g19610       | --                                                                                                           | F-box protein SNE; Protein SNEEZY; Sleepy protein 2 (At5g48170)                                                                                                                                                                             | 1.966  |
| Cs5g03280       | K16281 RING-H2 zinc finger protein RHA1   (RefSeq) E3 ubiquitin-protein ligase RHA1B (A)                     | E3 ubiquitin-protein ligase RHA1B {ECO:0000305}; EC=2.3.2.27; RING-H2 finger A1b {ECO:0000303 PubMed:9781696}; RING-H2 zinc finger protein RHA1b {ECO:0000305}; RING-type E3 ubiquitin transferase RHA1B {ECO:0000305} (At3g61460)          | -1.015 |
| Cs2g01310       | --                                                                                                           | BTB/POZ domain-containing protein At5g47800 (At5g47800)                                                                                                                                                                                     | 1.209  |

|                                                                    |                                                                                                                                   |                                                                                                                                                                                                                                                                                                                                                 |        |
|--------------------------------------------------------------------|-----------------------------------------------------------------------------------------------------------------------------------|-------------------------------------------------------------------------------------------------------------------------------------------------------------------------------------------------------------------------------------------------------------------------------------------------------------------------------------------------|--------|
| orange1.1t00031                                                    | K10638 E3 ubiquitin-protein ligase UHRF1 [EC:2.3.2.27]   (RefSeq) E3 ubiquitin-protein ligase ORTHRUS 2-like (A)                  | E3 ubiquitin-protein ligase ORTHRUS 2; EC=2.3.2.27; Protein VARIANT IN METHYLATION 1; RING-type E3 ubiquitin transferase ORTHRUS 2 {ECO:0000305} (At1g57820)                                                                                                                                                                                    | -1.115 |
| Cs8g15610                                                          | K10144 RING finger and CHY zinc finger domain-containing protein 1 [EC:2.3.2.27]   (RefSeq) E3 ubiquitin-protein ligase MIEL1 (A) | E3 ubiquitin-protein ligase RZFP34 {ECO:0000305}; EC=2.3.2.27 {ECO:0000269 PubMed:26508764}; CHY zinc-finger and RING protein 1 {ECO:0000303 PubMed:26508764}; RING zinc-finger protein 34 {ECO:0000305}; RZFP34 protein homolog {ECO:0000303 PubMed:25002225}; Short=AtRZPF34 {ECO:0000303 PubMed:25002225} (At5g22920)                        | -1.442 |
| orange1.1t00298                                                    | K10664 E3 ubiquitin-protein ligase ATL6/9/15/31/42/55 [EC:2.3.2.27]   (RefSeq) E3 ubiquitin-protein ligase ATL42-like (A)         | E3 ubiquitin-protein ligase ATL59; EC=2.3.2.27 {ECO:0000269 PubMed:15644464, ECO:0000269 PubMed:16339806}; RING-H2 finger protein ATL59; RING-type E3 ubiquitin transferase ATL59 {ECO:0000305} (At4g10160)                                                                                                                                     | 1.137  |
| Cs2g15840                                                          | K19038 E3 ubiquitin-protein ligase ATL41 [EC:2.3.2.27]   (RefSeq) E3 ubiquitin-protein ligase ATL41-like (A)                      | E3 ubiquitin-protein ligase ATL41; EC=2.3.2.27 {ECO:0000269 PubMed:15644464, ECO:0000269 PubMed:16339806}; RING-H2 finger protein ATL41; RING-type E3 ubiquitin transferase ATL41 {ECO:0000305} (At2g42360)                                                                                                                                     | -1.500 |
| <b>Cellular protein catabolic process (GO:0044257, P = 0.9984)</b> |                                                                                                                                   |                                                                                                                                                                                                                                                                                                                                                 |        |
| Cs2g28940                                                          | K16297 serine carboxypeptidase-like clade II [EC:3.4.16.-]   (RefSeq) putative serine carboxypeptidase-like 23 (A)                | Serine carboxypeptidase-like 40; EC=3.4.16.-; Flags: Precursor (At3g63470)                                                                                                                                                                                                                                                                      | 9.597  |
| Cs2g15700                                                          | K16292 KDEL-tailed cysteine endopeptidase [EC:3.4.22.-]   (RefSeq) senescence-specific cysteine protease SAG39-like (A)           | Senescence-specific cysteine protease SAG39 {ECO:0000305}; EC=3.4.22.- {ECO:0000305}; Cysteine proteinase SAG39 {ECO:0000305}; Protein SENESCENCE-ASSOCIATED GENE 39 {ECO:0000303 PubMed:20439547}; Flags: Precursor (At5g45890)                                                                                                                | 10.416 |
| novel.1058                                                         | K08770 ubiquitin C   (RefSeq) polyubiquitin (A)                                                                                   | Polyubiquitin 3; Ubiquitin; Flags: Precursor (At5g03240)                                                                                                                                                                                                                                                                                        | 2.857  |
| novel.1180                                                         | K16297 serine carboxypeptidase-like clade II [EC:3.4.16.-]   (RefSeq) serine carboxypeptidase-like 45 (A)                         | Serine carboxypeptidase-like 45; EC=3.4.16.-; Flags: Precursor (At1g43780)                                                                                                                                                                                                                                                                      | 12.677 |
| Cs2g04950                                                          | K16292 KDEL-tailed cysteine endopeptidase [EC:3.4.22.-]   (RefSeq) senescence-specific cysteine protease SAG39-like (A)           | KDEL-tailed cysteine endopeptidase CEP2; EC=3.4.22.-; Flags: Precursor (At3g49340)                                                                                                                                                                                                                                                              | 12.949 |
| Cs2g06030                                                          | K10581 ubiquitin-conjugating enzyme E2 O [EC:2.3.2.24]   (RefSeq) probable ubiquitin-conjugating enzyme E2 24 (A)                 | Probable ubiquitin-conjugating enzyme E2 24 {ECO:0000303 PubMed:16339806}; EC=2.3.2.23 {ECO:0000305}; AtPHO2 {ECO:0000303 PubMed:16679424}; E2 ubiquitin-conjugating enzyme 24 {ECO:0000303 PubMed:16339806}; Ubiquitin carrier protein 24 {ECO:0000303 PubMed:16339806}; Ubiquitin-protein ligase 24 {ECO:0000303 PubMed:16339806} (At2g16920) | 2.991  |
| novel.1618                                                         | --                                                                                                                                | F-box/kelch-repeat protein At3g23880 (At3g23880)                                                                                                                                                                                                                                                                                                | 2.980  |

|                 |                                                                                                                                  |                                                                                                                                                                                                              |        |
|-----------------|----------------------------------------------------------------------------------------------------------------------------------|--------------------------------------------------------------------------------------------------------------------------------------------------------------------------------------------------------------|--------|
| Cs3g20890       | K16297 serine carboxypeptidase-like clade II [EC:3.4.16.-]   (RefSeq) serine carboxypeptidase-like 42 (A)                        | Serine carboxypeptidase-like 42; EC=3.4.16.-; Flags: Precursor (At5g42240)                                                                                                                                   | 1.464  |
| Cs6g05870       | K10664 E3 ubiquitin-protein ligase ATL6/9/15/31/42/55 [EC:2.3.2.27]   (RefSeq) E3 ubiquitin-protein ligase ATL42-like (A)        | RING-H2 finger protein ATL57; EC=2.3.2.27 {ECO:0000305}; RING-type E3 ubiquitin transferase ATL57 {ECO:0000305} (At2g27940)                                                                                  | 9.204  |
| Cs7g13860       | K16297 serine carboxypeptidase-like clade II [EC:3.4.16.-]   (RefSeq) serine carboxypeptidase-like 34 (A)                        | Serine carboxypeptidase-like 34; EC=3.4.16.-; Flags: Precursor (At5g23210)                                                                                                                                   | 3.026  |
| novel.29        | K19040 E3 ubiquitin-protein ligase ATL10/75/76/77/78 [EC:2.3.2.27]   (RefSeq) RING-H2 finger protein ATL78 (A)                   | RING-H2 finger protein ATL78; EC=2.3.2.27 {ECO:0000305}; RING-type E3 ubiquitin transferase ATL78 {ECO:0000305} (At1g49230)                                                                                  | 2.864  |
| Cs7g28960       | K19038 E3 ubiquitin-protein ligase ATL41 [EC:2.3.2.27]   (RefSeq) E3 ubiquitin-protein ligase ATL41-like (A)                     | RING-H2 finger protein ATL52; EC=2.3.2.27 {ECO:0000305}; RING-type E3 ubiquitin transferase ATL52 {ECO:0000305} (At5g17600)                                                                                  | 4.216  |
| Cs5g34810       | --                                                                                                                               | F-box/kelch-repeat protein At3g24760 (At3g24760)                                                                                                                                                             | 1.420  |
| Cs7g28430       | K03094 S-phase kinase-associated protein 1   (RefSeq) SKP1-like protein 1A (A)                                                   | SKP1-like protein 4; AtSK4; (At1g20140)                                                                                                                                                                      | 7.601  |
| Cs2g06115       | K10666 E3 ubiquitin-protein ligase RNF5 [EC:2.3.2.27]   (RefSeq) E3 ubiquitin-protein ligase RMA1H1 (A)                          | E3 ubiquitin-protein ligase RMA1H1; EC=2.3.2.27; Protein RING membrane-anchor 1 homolog 1; RING-type E3 ubiquitin transferase RMA1H1 {ECO:0000305} (At4g27470)                                               | -1.106 |
| Cs2g30000       | K19045 E3 ubiquitin-protein ligase BIG BROTHER and related proteins [EC:2.3.2.27]   (RefSeq) E3 ubiquitin ligase BIG BROTHER (A) | E3 ubiquitin ligase BIG BROTHER; EC=2.3.2.27 {ECO:0000269 PubMed:16461280, ECO:0000269 PubMed:18483219}; Protein ENHANCER OF DA1-1; RING-type E3 ubiquitin transferase BIG BROTHER {ECO:0000305} (At3g19910) | -1.097 |
| Cs5g02260       | K19040 E3 ubiquitin-protein ligase ATL10/75/76/77/78 [EC:2.3.2.27]   (RefSeq) E3 ubiquitin-protein ligase ATL76-like (A)         | Putative RING-H2 finger protein ATL21A; EC=2.3.2.27 {ECO:0000305}; RING-type E3 ubiquitin transferase ATL21A {ECO:0000305}; Flags: Precursor (At5g07040)                                                     | 1.053  |
| Cs7g15630       | K10664 E3 ubiquitin-protein ligase ATL6/9/15/31/42/55 [EC:2.3.2.27]   (RefSeq) E3 ubiquitin-protein ligase ATL42-like (A)        | RING-H2 finger protein ATL51; EC=2.3.2.27 {ECO:0000305}; RING-type E3 ubiquitin transferase ATL51 {ECO:0000305} (At3g03550)                                                                                  | -1.995 |
| Cs4g06540       | K16281 RING-H2 zinc finger protein RHA1   (RefSeq) E3 ubiquitin-protein ligase RHA1B (A)                                         | RING-H2 finger protein ATL11; EC=2.3.2.27 {ECO:0000305}; RING-type E3 ubiquitin transferase ATL11 {ECO:0000305}; Flags: Precursor (At5g20880_1)                                                              | -1.041 |
| Cs4g07410       | K01366 cathepsin H [EC:3.4.22.16]   (RefSeq) cysteine protease Cp (A)                                                            | Thiol protease aleurain; AtALEU; EC=3.4.22.16; Senescence-associated gene product 2; Flags: Precursor (At5g60360)                                                                                            | 1.243  |
| orange1.1t02216 | K04506 E3 ubiquitin-protein ligase SIAH1 [EC:2.3.2.27]   (RefSeq) E3 ubiquitin-protein ligase SINAT2 (A)                         | E3 ubiquitin-protein ligase SINAT2 {ECO:0000305}; EC=2.3.2.27 {ECO:0000269 PubMed:28351989}; RING-type E3 ubiquitin transferase SINAT2 {ECO:0000305}; Seven in absentia homolog 2 {ECO:0000305} (At3g58040)  | 1.092  |
| Cs6g16440       | K13148 integrator complex subunit 11 [EC:3.1.27.-]   (RefSeq) cleavage and polyadenylation specificity factor subunit 3-II (A)   | E3 ubiquitin-protein ligase At4g11680; EC=2.3.2.27; RING finger protein At4g11680; RING-type E3 ubiquitin transferase At4g11680 {ECO:0000305} (At1g68070)                                                    | -1.323 |

|                 |                                                                                                                                             |                                                                                                                                                                                                                                    |        |
|-----------------|---------------------------------------------------------------------------------------------------------------------------------------------|------------------------------------------------------------------------------------------------------------------------------------------------------------------------------------------------------------------------------------|--------|
| Cs8g15390       | K09646 serine carboxypeptidase 1 [EC:3.4.16.-]   (RefSeq) serine carboxypeptidase-like 51 (A)                                               | Serine carboxypeptidase-like 51; EC=3.4.16.-; Flags: Precursor (At2g27920)                                                                                                                                                         | 1.674  |
| Cs3g27870       | K19040 E3 ubiquitin-protein ligase ATL10/75/76/77/78 [EC:2.3.2.27]   (RefSeq) RING-H2 finger protein ATL74 (A)                              | RING-H2 finger protein ATL80; EC=2.3.2.27 {ECO:0000305}; RING-type E3 ubiquitin transferase ATL80 {ECO:0000305} (At1g20823)                                                                                                        | -1.213 |
| novel.139       | K19037 E3 ubiquitin-protein ligase ATL23 [EC:2.3.2.27]   (RefSeq) E3 ubiquitin-protein ligase ATL23 (A)                                     | E3 ubiquitin-protein ligase Os04g0590900; EC=2.3.2.27 {ECO:0000250 UniProtKB:Q9SLC3}; RING-H2 finger protein Os04g0590900; RING-type E3 ubiquitin transferase Os04g0590900 {ECO:0000305} (At1g49230)                               | 2.415  |
| novel.8         | K16281 RING-H2 zinc finger protein RHA1   (RefSeq) E3 ubiquitin-protein ligase RHA1B (A)                                                    | E3 ubiquitin-protein ligase RHA2A {ECO:0000305}; EC=2.3.2.27; RING-H2 finger A2a {ECO:0000303 PubMed:9781696}; RING-H2 zinc finger protein RHA2a {ECO:0000305}; RING-type E3 ubiquitin transferase RHA2A {ECO:0000305} (At1g15100) | 1.086  |
| Cs7g02360       | K16297 serine carboxypeptidase-like clade II [EC:3.4.16.-]   (RefSeq) serine carboxypeptidase-like 40 (A)                                   | Serine carboxypeptidase-like 40; EC=3.4.16.-; Flags: Precursor (At3g63470)                                                                                                                                                         | -2.258 |
| orange1.1t01521 | K10664 E3 ubiquitin-protein ligase ATL6/9/15/31/42/55 [EC:2.3.2.27]   (RefSeq) E3 ubiquitin-protein ligase ATL6-like (A)                    | RING-H2 finger protein ATL38; EC=2.3.2.27 {ECO:0000305}; RING-type E3 ubiquitin transferase ATL38 {ECO:0000305} (At2g34990)                                                                                                        | -1.275 |
| Cs7g30200       | K10523 speckle-type POZ protein   (RefSeq) BTB/POZ domain-containing protein At3g56230-like (A)                                             | BTB/POZ domain-containing protein At3g56230 (At3g56230)                                                                                                                                                                            | -1.902 |
| Cs2g21130       | K19042 E3 ubiquitin-protein ligase BOI and related proteins [EC:2.3.2.27]   (RefSeq) probable BOI-related E3 ubiquitin-protein ligase 2 (A) | Probable BOI-related E3 ubiquitin-protein ligase 2; EC=2.3.2.27 {ECO:0000250 UniProtKB:Q9FHE4}; RING-type E3 ubiquitin transferase BRG2 {ECO:0000305} (At1g10650)                                                                  | 3.550  |
| Cs5g10280       | --                                                                                                                                          | BAG family molecular chaperone regulator 1; Bcl-2-associated athanogene 1 (At5g52060)                                                                                                                                              | 1.197  |
| Cs8g01170       | K16290 xylem cysteine proteinase [EC:3.4.22.-]   (RefSeq) xylem cysteine proteinase 1-like (A)                                              | Cysteine protease XCP1 {ECO:0000305}; EC=3.4.22.-; Xylem cysteine peptidase 1 {ECO:0000303 PubMed:10889267}; AtXCP1 {ECO:0000303 PubMed:10889267}; Flags: Precursor (At4g35350)                                                    | -1.145 |
| novel.1004      | K16297 serine carboxypeptidase-like clade II [EC:3.4.16.-]   (RefSeq) serine carboxypeptidase-like 35 (A)                                   | Serine carboxypeptidase-like 35; EC=3.4.16.-; Flags: Precursor (At5g08260)                                                                                                                                                         | -1.020 |
| novel.1931      | --                                                                                                                                          | BTB/POZ and TAZ domain-containing protein 3; BTB and TAZ domain protein 3 (At1g05690)                                                                                                                                              | -1.468 |
| Cs7g02700       | K16297 serine carboxypeptidase-like clade II [EC:3.4.16.-]   (RefSeq) serine carboxypeptidase-like 45 (A)                                   | Serine carboxypeptidase-like 45; EC=3.4.16.-; Flags: Precursor (At1g28110)                                                                                                                                                         | -1.423 |
| Cs8g05200       | K16290 xylem cysteine proteinase [EC:3.4.22.-]   (RefSeq) xylem cysteine proteinase 1 (A)                                                   | Cysteine proteinase RD21A {ECO:0000305}; EC=3.4.22.- {ECO:0000305}; Protein RESPONSIVE TO DEHYDRATION 21 {ECO:0000303 PubMed:8325504}; RD21 {ECO:0000303 PubMed:8325504}; Flags: Precursor (At1g47128_1)                           | -1.999 |

|                 |                                                                                                                           |                                                                                                                                                                                                                                                                             |        |
|-----------------|---------------------------------------------------------------------------------------------------------------------------|-----------------------------------------------------------------------------------------------------------------------------------------------------------------------------------------------------------------------------------------------------------------------------|--------|
| Cs2g13390       | K16282 E3 ubiquitin-protein ligase RHA2 [EC:2.3.2.27]   (RefSeq) E3 ubiquitin-protein ligase RHA2A (A)                    | E3 ubiquitin-protein ligase RHA2A {ECO:0000305}; EC=2.3.2.27; RING-H2 finger A2a {ECO:0000303 PubMed:9781696}; RING-H2 zinc finger protein RHA2a {ECO:0000305}; RING-type E3 ubiquitin transferase RHA2A {ECO:0000305} (At1g15100)                                          | -1.089 |
| Cs3g23900       | K16297 serine carboxypeptidase-like clade II [EC:3.4.16.-]   (RefSeq) serine carboxypeptidase-like 40 (A)                 | Putative serine carboxypeptidase-like 23; EC=3.4.16.-; Flags: Precursor (At2g24010)                                                                                                                                                                                         | 1.477  |
| Cs9g10700       | K19041 E3 ubiquitin-protein ligase RNF38/44 [EC:2.3.2.27]   (RefSeq) RING-H2 finger protein ATL16 (A)                     | RING-H2 finger protein ATL1; EC=2.3.2.27 {ECO:0000305}; RING-type E3 ubiquitin transferase ATL1 {ECO:0000305} (At1g04360)                                                                                                                                                   | -1.883 |
| Cs5g30360       | --                                                                                                                        | F-box/LRR-repeat protein 17; F-box-like protein 17 (At3g54650)                                                                                                                                                                                                              | -1.562 |
| orange1.1t05195 | K10664 E3 ubiquitin-protein ligase ATL6/9/15/31/42/55 [EC:2.3.2.27]   (RefSeq) E3 ubiquitin-protein ligase ATL42-like (A) | RING-H2 finger protein ATL33; EC=2.3.2.27 {ECO:0000305}; RING-type E3 ubiquitin transferase ATL33 {ECO:0000305} (At2g37580_1)                                                                                                                                               | -1.184 |
| Cs2g19610       | --                                                                                                                        | F-box protein SNE; Protein SNEEZY; Sleepy protein 2 (At5g48170)                                                                                                                                                                                                             | 1.966  |
| Cs8g20100       | K03320 ammonium transporter, Amt family   (RefSeq) LOW QUALITY PROTEIN: ammonium transporter 1 member 2 (A)               | E3 ubiquitin-protein ligase AIRP2 {ECO:0000305}; EC=2.3.2.27 {ECO:0000269 PubMed:21969385}; Protein ABA INSENSITIVE RING PROTEIN 2 {ECO:0000303 PubMed:21969385}; AtAIRP2 {ECO:0000303 PubMed:21969385}; RING-type E3 ubiquitin transferase AIRP2 {ECO:0000305} (At3g47160) | -1.285 |
| Cs1g21740       | K04498 E1A/CREB-binding protein [EC:2.3.1.48]   (RefSeq) histone acetyltransferase HAC1-like (A)                          | BTB/POZ and TAZ domain-containing protein 4; BTB and TAZ domain protein 4 (At5g67480)                                                                                                                                                                                       | 1.117  |
| Cs5g03280       | K16281 RING-H2 zinc finger protein RHA1   (RefSeq) E3 ubiquitin-protein ligase RHA1B (A)                                  | E3 ubiquitin-protein ligase RHA1B {ECO:0000305}; EC=2.3.2.27; RING-H2 finger A1b {ECO:0000303 PubMed:9781696}; RING-H2 zinc finger protein RHA1b {ECO:0000305}; RING-type E3 ubiquitin transferase RHA1B {ECO:0000305} (At3g61460)                                          | -1.015 |
| Cs6g21270       | K10661 E3 ubiquitin-protein ligase MARCH6 [EC:2.3.2.27]   (RefSeq) probable E3 ubiquitin ligase SUD1 (A)                  | Probable E3 ubiquitin ligase SUD1; EC=2.3.2.27; Protein ECERIFERUM 9; Protein SUPPRESSOR OF DRY2 DEFECTS 1; AtSUD1; RING-type E3 ubiquitin transferase SUD1 {ECO:0000305}; RING/U-box domain-containing protein (At2g02960)                                                 | 2.917  |
| Cs9g18010       | K10664 E3 ubiquitin-protein ligase ATL6/9/15/31/42/55 [EC:2.3.2.27]   (RefSeq) RING-H2 finger protein ATL11-like (A)      | Putative RING-H2 finger protein ATL21A; EC=2.3.2.27 {ECO:0000305}; RING-type E3 ubiquitin transferase ATL21A {ECO:0000305}; Flags: Precursor (At5g53110)                                                                                                                    | 1.591  |
| novel.1603      | --                                                                                                                        | F-box/kelch-repeat protein At1g15670 (At1g15670)                                                                                                                                                                                                                            | -1.683 |
| Cs3g16050       | --                                                                                                                        | F-box/kelch-repeat protein At5g43190 (At5g43190)                                                                                                                                                                                                                            | -1.042 |
| novel.2234      | --                                                                                                                        | BTB/POZ and TAZ domain-containing protein 3; BTB and TAZ domain protein 3 (At1g05690)                                                                                                                                                                                       | -2.231 |
| Cs2g15840       | K19038 E3 ubiquitin-protein ligase ATL41 [EC:2.3.2.27]   (RefSeq) E3 ubiquitin-protein ligase ATL41-like (A)              | E3 ubiquitin-protein ligase ATL41; EC=2.3.2.27 {ECO:0000269 PubMed:15644464, ECO:0000269 PubMed:16339806}; RING-                                                                                                                                                            | -1.500 |

|                                                                          |                                                                                                                                             |                                                                                                                                                                                                                                                                                                                                                                            |        |
|--------------------------------------------------------------------------|---------------------------------------------------------------------------------------------------------------------------------------------|----------------------------------------------------------------------------------------------------------------------------------------------------------------------------------------------------------------------------------------------------------------------------------------------------------------------------------------------------------------------------|--------|
|                                                                          |                                                                                                                                             | H2 finger protein ATL41; RING-type E3 ubiquitin transferase ATL41 {ECO:0000305} (At2g42360)                                                                                                                                                                                                                                                                                |        |
| Cs3g26440                                                                | K19042 E3 ubiquitin-protein ligase BOI and related proteins [EC:2.3.2.27]   (RefSeq) probable BOI-related E3 ubiquitin-protein ligase 2 (A) | BOI-related E3 ubiquitin-protein ligase 1; EC=2.3.2.27 {ECO:0000269 PubMed:20921156}; RING-type E3 ubiquitin transferase BRG1 {ECO:0000305} (At4g35070)                                                                                                                                                                                                                    | -1.122 |
|                                                                          |                                                                                                                                             |                                                                                                                                                                                                                                                                                                                                                                            |        |
| <b>Others related to protein degradation</b>                             |                                                                                                                                             |                                                                                                                                                                                                                                                                                                                                                                            |        |
| Cs3g06710                                                                | K08653 membrane-bound transcription factor site-1 protease [EC:3.4.21.112]   (RefSeq) subtilisin-like protease SBT6.1 (A)                   | CO(2)-response secreted protease {ECO:0000303 PubMed:25043023}; Subtilisin-like serine protease {ECO:0000303 PubMed:25043023}; AtSBT5.2 {ECO:0000303 PubMed:25043023}; Tripeptidyl-peptidase II {ECO:0000255 PROSITE-ProRule:PRU10081}; EC=3.4.14.10 {ECO:0000255 PROSITE-ProRule:PRU10081}; Flags Precursor (At1g20160)                                                   | -1.415 |
| Cs3g23350                                                                | K08653 membrane-bound transcription factor site-1 protease [EC:3.4.21.112]   (RefSeq) subtilisin-like protease SBT6.1 (A)                   | Subtilisin-like protease SBT1.7 {ECO:0000303 PubMed:16193095}; EC=3.4.21.- {ECO:0000305}; Cucumisin-like serine protease; Subtilase subfamily 1 member 7 {ECO:0000303 PubMed:16193095}; AtSBT1.7 {ECO:0000303 PubMed:16193095}; Subtilisin-like serine protease 1 {ECO:0000303 PubMed:12702015}; At-SLP1 {ECO:0000303 PubMed:12702015}; Flags: Precursor (At5g67360)       | 11.648 |
| Cs3g23360                                                                | K08653 membrane-bound transcription factor site-1 protease [EC:3.4.21.112]   (RefSeq) subtilisin-like protease SBT6.1 (A)                   | Subtilisin-like protease SBT1.9 {ECO:0000303 PubMed:16193095}; EC=3.4.21.- {ECO:0000255 PROSITE-ProRule:PRU10082}; Subtilase subfamily 1 member 9 {ECO:0000303 PubMed:16193095}; AtSBT1.9 {ECO:0000303 PubMed:16193095}; Flags: Precursor (At5g67090)                                                                                                                      | 8.425  |
| Cs8g05500                                                                | K08653 membrane-bound transcription factor site-1 protease [EC:3.4.21.112]   (RefSeq) subtilisin-like protease SBT6.1 (A)                   | Subtilisin-like protease SBT1.7 {ECO:0000303 PubMed:16193095}; EC=3.4.21.- {ECO:0000305}; Cucumisin-like serine protease; Subtilase subfamily 1 member 7 {ECO:0000303 PubMed:16193095}; Short=AtSBT1.7 {ECO:0000303 PubMed:16193095}; Subtilisin-like serine protease 1 {ECO:0000303 PubMed:12702015}; At-SLP1 {ECO:0000303 PubMed:12702015}; Flags: Precursor (At5g67360) | 6.027  |
| Cs4g12980                                                                | K13989 Derlin-2/3   (RefSeq) derlin-1 (A)                                                                                                   | Derlin-1; AtDerlin1-1 (At4g29330)                                                                                                                                                                                                                                                                                                                                          | 1.061  |
| Cs9g15350                                                                | K13989 Derlin-2/3   (RefSeq) derlin-1-like (A)                                                                                              | Derlin-1; AtDerlin1-1 (At4g29330)                                                                                                                                                                                                                                                                                                                                          | 4.758  |
|                                                                          |                                                                                                                                             |                                                                                                                                                                                                                                                                                                                                                                            |        |
| <b>Protein processing in endoplasmic reticulum (ko04141, P = 0.9955)</b> |                                                                                                                                             |                                                                                                                                                                                                                                                                                                                                                                            |        |
| Cs7g28430                                                                | K03094 S-phase kinase-associated protein 1   (RefSeq) SKP1-like protein 1A (A)                                                              | SKP1-like protein 4; AtSK4; (At1g20140)                                                                                                                                                                                                                                                                                                                                    | 7.601  |
| Cs7g29170                                                                | K03283 heat shock 70kDa protein 1/2/6/8   (RefSeq) heat shock 70 kDa protein 18-like (A)                                                    | Probable nucleoredoxin 1-2; OsNrx1-2; EC=1.8.1.8 (At2g16050)                                                                                                                                                                                                                                                                                                               | 1.561  |

|                 |                                                                                                                           |                                                                                                                                                                                                                                                                                                                                                                            |        |
|-----------------|---------------------------------------------------------------------------------------------------------------------------|----------------------------------------------------------------------------------------------------------------------------------------------------------------------------------------------------------------------------------------------------------------------------------------------------------------------------------------------------------------------------|--------|
| Cs3g06710       | K08653 membrane-bound transcription factor site-1 protease [EC:3.4.21.112]   (RefSeq) subtilisin-like protease SBT6.1 (A) | CO(2)-response secreted protease {ECO:0000303 PubMed:25043023}; Subtilisin-like serine protease {ECO:0000303 PubMed:25043023}; AtSBT5.2 {ECO:0000303 PubMed:25043023}; Tripeptidyl-peptidase II {ECO:0000255 PROSITE-ProRule:PRU10081}; EC=3.4.14.10 {ECO:0000255 PROSITE-ProRule:PRU10081}; Flags Precursor (At1g20160)                                                   | -1.415 |
| Cs3g23350       | K08653 membrane-bound transcription factor site-1 protease [EC:3.4.21.112]   (RefSeq) subtilisin-like protease SBT6.1 (A) | Subtilisin-like protease SBT1.7 {ECO:0000303 PubMed:16193095}; EC=3.4.21.- {ECO:0000305}; Cucumisin-like serine protease; Subtilase subfamily 1 member 7 {ECO:0000303 PubMed:16193095}; AtSBT1.7 {ECO:0000303 PubMed:16193095}; Subtilisin-like serine protease 1 {ECO:0000303 PubMed:12702015}; At-SLP1 {ECO:0000303 PubMed:12702015}; Flags: Precursor (At5g67360)       | 11.648 |
| Cs3g23360       | K08653 membrane-bound transcription factor site-1 protease [EC:3.4.21.112]   (RefSeq) subtilisin-like protease SBT6.1 (A) | Subtilisin-like protease SBT1.9 {ECO:0000303 PubMed:16193095}; EC=3.4.21.- {ECO:0000255 PROSITE-ProRule:PRU10082}; Subtilase subfamily 1 member 9 {ECO:0000303 PubMed:16193095}; AtSBT1.9 {ECO:0000303 PubMed:16193095}; Flags: Precursor (At5g67090)                                                                                                                      | 8.425  |
| Cs8g05500       | K08653 membrane-bound transcription factor site-1 protease [EC:3.4.21.112]   (RefSeq) subtilisin-like protease SBT6.1 (A) | Subtilisin-like protease SBT1.7 {ECO:0000303 PubMed:16193095}; EC=3.4.21.- {ECO:0000305}; Cucumisin-like serine protease; Subtilase subfamily 1 member 7 {ECO:0000303 PubMed:16193095}; Short=AtSBT1.7 {ECO:0000303 PubMed:16193095}; Subtilisin-like serine protease 1 {ECO:0000303 PubMed:12702015}; At-SLP1 {ECO:0000303 PubMed:12702015}; Flags: Precursor (At5g67360) | 6.027  |
| Cs3g10530       | K09517 DnaJ homolog subfamily B member 11   (RefSeq) dnaJ protein ERDJ3B (A)                                              | DnaJ protein ERDJ3B; Chaperone protein dnaJ 19; AtDjB19; AtJ19; Endoplasmic reticulum dnaJ domain-containing protein 3B; AtERdj3B; Protein SCJ1 homolog ERDJ3B; Flags: Precursor (At3g62600)                                                                                                                                                                               | -1.295 |
| Cs5g27560       | K09517 DnaJ homolog subfamily B member 11   (RefSeq) dnaJ protein ERDJ3B (A)                                              | Chaperone protein dnaJ 20, chloroplastic; AtDjC20; AtJ20; Flags: Precursor (At4g13830)                                                                                                                                                                                                                                                                                     | 1.144  |
| novel.1143      | K09561 STIP1 homology and U-box containing protein 1 [EC:2.3.2.27]   (RefSeq) E3 ubiquitin-protein ligase CHIP (A)        | E3 ubiquitin-protein ligase PUB24; EC=2.3.2.27; Plant U-box protein 24; RING-type E3 ubiquitin transferase PUB24 {ECO:0000305}; U-box domain-containing protein 24 (At3g11840)                                                                                                                                                                                             | 1.734  |
| orange1.1t03984 | K09580 protein disulfide-isomerase A1 [EC:5.3.4.1]   (RefSeq) protein disulfide isomerase-like 1-4 (A)                    | Protein disulfide isomerase-like 1-3; AtPDIL1-3; EC=5.3.4.1; Protein disulfide isomerase 1; AtPDI1; Protein disulfide isomerase-like 2-1; AtPDIL2-1; Flags: Precursor (At5g60640)                                                                                                                                                                                          | 7.310  |
| orange1.1t03989 | K09580 protein disulfide-isomerase A1 [EC:5.3.4.1]   (RefSeq) protein disulfide isomerase-like 1-4 (A)                    | Protein disulfide isomerase-like 1-3; AtPDIL1-3; EC=5.3.4.1; Protein disulfide isomerase 1; AtPDI1; Protein disulfide isomerase-like 2-1; AtPDIL2-1; Flags: Precursor (At3g54960)                                                                                                                                                                                          | 6.084  |

|                 |                                                                                                          |                                                                                                                                                                                                                             |        |
|-----------------|----------------------------------------------------------------------------------------------------------|-----------------------------------------------------------------------------------------------------------------------------------------------------------------------------------------------------------------------------|--------|
| orange1.1t04199 | K09580 protein disulfide-isomerase A1 [EC:5.3.4.1]   (RefSeq) protein disulfide isomerase-like 1-4 (A)   | Protein disulfide isomerase-like 1-3; AtPDIL1-3; EC=5.3.4.1; Protein disulfide isomerase 1; AtPDI1; Protein disulfide isomerase-like 2-1; AtPDIL2-1; Flags: Precursor (At3g54960)                                           | 6.809  |
| orange1.1t06023 | K09580 protein disulfide-isomerase A1 [EC:5.3.4.1]   (RefSeq) protein disulfide isomerase-like 1-3 (A)   | --                                                                                                                                                                                                                          | 5.322  |
| novel.2159      | K09580 protein disulfide-isomerase A1 [EC:5.3.4.1]   (RefSeq) protein disulfide isomerase-like 1-4 (A)   | Protein disulfide isomerase-like 1-4; AtPDIL1-4; EC=5.3.4.1; Protein disulfide isomerase 2; AtPDI2; Protein disulfide isomerase-like 2-2; AtPDIL2-2; Flags: Precursor (At5g60640)                                           | 8.889  |
| novel.2184      | K09580 protein disulfide-isomerase A1 [EC:5.3.4.1]   (RefSeq) protein disulfide isomerase-like 1-4 (A)   | Protein disulfide isomerase-like 1-4; AtPDIL1-4; EC=5.3.4.1; Protein disulfide isomerase 2; AtPDI2; Protein disulfide isomerase-like 2-2; AtPDIL2-2; Flags: Precursor (At5g60640)                                           | 6.250  |
| novel.2185      | K09580 protein disulfide-isomerase A1 [EC:5.3.4.1]   (RefSeq) protein disulfide isomerase-like 1-3 (A)   | --                                                                                                                                                                                                                          | 6.876  |
| novel.1368      | K09580 protein disulfide-isomerase A1 [EC:5.3.4.1]   (RefSeq) protein disulfide isomerase-like 1-3 (A)   | --                                                                                                                                                                                                                          | 3.642  |
| Cs6g21270       | K10661 E3 ubiquitin-protein ligase MARCH6 [EC:2.3.2.27]   (RefSeq) probable E3 ubiquitin ligase SUD1 (A) | Probable E3 ubiquitin ligase SUD1; EC=2.3.2.27; Protein ECERIFERUM 9; Protein SUPPRESSOR OF DRY2 DEFECTS 1; AtSUD1; RING-type E3 ubiquitin transferase SUD1 {ECO:0000305}; RING/U-box domain-containing protein (At2g02960) | 2.917  |
| Cs2g06115       | K10666 E3 ubiquitin-protein ligase RNF5 [EC:2.3.2.27]   (RefSeq) E3 ubiquitin-protein ligase RMA1H1 (A)  | E3 ubiquitin-protein ligase RMA1H1; EC=2.3.2.27; Protein RING membrane-anchor 1 homolog 1; RING-type E3 ubiquitin transferase RMA1H1 {ECO:0000305} (At4g27470)                                                              | -1.106 |
| Cs4g12980       | K13989 Derlin-2/3   (RefSeq) derlin-1 (A)                                                                | Derlin-1; AtDerlin1-1 (At4g29330)                                                                                                                                                                                           | 1.061  |
| Cs9g15350       | K13989 Derlin-2/3   (RefSeq) derlin-1-like (A)                                                           | Derlin-1; AtDerlin1-1 (At4g29330)                                                                                                                                                                                           | 4.758  |
| Cs2g28910       | K13993 HSP20 family protein   (RefSeq) 17.6 kDa class I heat shock protein (A)                           | Protein RESTRICTED TEV MOVEMENT 2; Alpha-crystallin domains containing protein 41.3; AtAcd41.3; Restricted tobacco etch virus movement protein 2 (At2g27140)                                                                | -1.244 |
| Cs5g08940       | K13993 HSP20 family protein   (RefSeq) small heat shock protein, chloroplastic-like (A)                  | Heat shock 22 kDa protein, mitochondrial; Flags: Precursor (At4g25200)                                                                                                                                                      | 1.174  |
| Cs7g23890       | K13993 HSP20 family protein   (RefSeq) 17.6 kDa class I heat shock protein (A)                           | Protein RESTRICTED TEV MOVEMENT 2; Alpha-crystallin domains containing protein 41.3; AtAcd41.3; Restricted tobacco etch virus movement protein 2 (At5g04890)                                                                | -1.270 |
| Cs7g32260       | K13993 HSP20 family protein   (RefSeq) 18.1 kDa class I heat shock protein-like (A)                      | 18.1 kDa class I heat shock protein; 18.1 kDa heat shock protein; AtHsp18.1 (At5g59720)                                                                                                                                     | 4.455  |
| Cs8g14930       | K13993 HSP20 family protein   (RefSeq) 17.3 kDa class I heat shock protein-like (A)                      | 17.6 kDa class I heat shock protein 1; 17.6 kDa heat shock protein 1; AtHsp17.6A (At1g59860)                                                                                                                                | 1.855  |

|                                                 |                                                                                                          |                                                                                                                                                                                                             |        |
|-------------------------------------------------|----------------------------------------------------------------------------------------------------------|-------------------------------------------------------------------------------------------------------------------------------------------------------------------------------------------------------------|--------|
| Cs8g18360                                       | K13993 HSP20 family protein   (RefSeq) 17.4 kDa class I heat shock protein-like (A)                      | 17.4 kDa class I heat shock protein; 17.4 kDa heat shock protein 1; AtHsp17.4A (At3g46230)                                                                                                                  | -1.112 |
| Cs8g19510                                       | K13993 HSP20 family protein   (RefSeq) 17.3 kDa class I heat shock protein-like (A)                      | 18.5 kDa class I heat shock protein; HSP 18.5 (At2g29500)                                                                                                                                                   | -1.162 |
| Cs8g19520                                       | K13993 HSP20 family protein   (RefSeq) 18.2 kDa class I heat shock protein (A)                           | 18.5 kDa class I heat shock protein; HSP 18.5; (At1g07400)                                                                                                                                                  | -1.627 |
| orange1.1t05694                                 | K13993 HSP20 family protein   (RefSeq) 17.3 kDa class I heat shock protein-like (A)                      | 17.6 kDa class I heat shock protein; Hsp20.0 (At2g29500)                                                                                                                                                    | -1.073 |
| novel.1531                                      | K13993 HSP20 family protein   (RefSeq) 17.3 kDa class I heat shock protein-like (A)                      | 17.8 kDa class I heat shock protein; 17.8 kDa heat shock protein; AtHsp17.8                                                                                                                                 | 5.823  |
| Cs3g04560                                       | K14007 protein transport protein SEC24   (RefSeq) protein transport protein Sec24-like At4g32640 (A)     | Protein transport protein Sec24-like At4g32640 (At4g32640)                                                                                                                                                  | 1.246  |
| Cs5g27810                                       | K24348 UBX domain-containing protein 1/4   (RefSeq) eukaryotic translation initiation factor 5B (A)      | Plant UBX domain-containing protein 2 {ECO:0000303 Ref.8}; PUX2 {ECO:0000303 Ref.8}; AtPUB3 {ECO:0000303 PubMed:11587532}; CDC48-interacting UBX-domain protein 2 {ECO:0000312 EMBL:AAS78924.1} (At1g04850) | -1.141 |
| <b>Protein folding (GO:0006457, P = 0.9951)</b> |                                                                                                          |                                                                                                                                                                                                             |        |
| novel.2184                                      | K09580 protein disulfide-isomerase A1 [EC:5.3.4.1]   (RefSeq) protein disulfide isomerase-like 1-4 (A)   | Protein disulfide isomerase-like 1-4; AtPDIL1-4; EC=5.3.4.1; Protein disulfide isomerase 2; AtPDI2; Protein disulfide isomerase-like 2-2; AtPDIL2-2; Flags: Precursor (At5g60640)                           | 6.250  |
| orange1.1t03984                                 | K09580 protein disulfide-isomerase A1 [EC:5.3.4.1]   (RefSeq) protein disulfide isomerase-like 1-4 (A)   | Protein disulfide isomerase-like 1-3; AtPDIL1-3; EC=5.3.4.1; Protein disulfide isomerase 1; AtPDI1; Protein disulfide isomerase-like 2-1; AtPDIL2-1; Flags: Precursor (At5g60640)                           | 7.310  |
| Cs5g27560                                       | K09517 DnaJ homolog subfamily B member 11   (RefSeq) dnaJ protein ERDJ3B (A)                             | Chaperone protein dnaJ 20, chloroplastic; AtDjC20; AtJ20; Flags: Precursor (At4g13830)                                                                                                                      | 1.144  |
| orange1.1t03989                                 | K09580 protein disulfide-isomerase A1 [EC:5.3.4.1]   (RefSeq) protein disulfide isomerase-like 1-4 (A)   | Protein disulfide isomerase-like 1-3; AtPDIL1-3; EC=5.3.4.1; Protein disulfide isomerase 1; AtPDI1; Protein disulfide isomerase-like 2-1; AtPDIL2-1; Flags: Precursor (At3g54960)                           | 6.084  |
| orange1.1t04199                                 | K09580 protein disulfide-isomerase A1 [EC:5.3.4.1]   (RefSeq) protein disulfide isomerase-like 1-4 (A)   | Protein disulfide isomerase-like 1-3; AtPDIL1-3; EC=5.3.4.1; Protein disulfide isomerase 1; AtPDI1; Protein disulfide isomerase-like 2-1; AtPDIL2-1; Flags: Precursor (At3g54960)                           | 6.809  |
| novel.2159                                      | K09580 protein disulfide-isomerase A1 [EC:5.3.4.1]   (RefSeq) protein disulfide isomerase-like 1-4 (A)   | Protein disulfide isomerase-like 1-4; AtPDIL1-4; EC=5.3.4.1; Protein disulfide isomerase 2; AtPDI2; Protein disulfide isomerase-like 2-2; AtPDIL2-2; Flags: Precursor (At5g60640)                           | 8.889  |
| Cs7g12310                                       | K04077 chaperonin GroEL   (RefSeq) ruBisCO large subunit-binding protein subunit beta, chloroplastic (A) | Chaperonin 60 subunit beta 4, chloroplastic; CPN-60 beta 4; Flags: Precursor (At1g26230)                                                                                                                    | 2.753  |

|                                                                        |                                                                                                                                                                                                |                                                                                                                                                                                                                        |        |
|------------------------------------------------------------------------|------------------------------------------------------------------------------------------------------------------------------------------------------------------------------------------------|------------------------------------------------------------------------------------------------------------------------------------------------------------------------------------------------------------------------|--------|
| Cs2g02250                                                              | --                                                                                                                                                                                             | BAG family molecular chaperone regulator 5, mitochondrial; Bcl-2-associated athanogene 5; Flags: Precursor (At1g12060)                                                                                                 | -1.659 |
| Cs8g14930                                                              | K13993 HSP20 family protein   (RefSeq) 17.3 kDa class I heat shock protein-like (A)                                                                                                            | 17.6 kDa class I heat shock protein 1; 17.6 kDa heat shock protein 1; AtHsp17.6A (At1g59860)                                                                                                                           | 1.855  |
| Cs9g14610                                                              | --                                                                                                                                                                                             | BAG family molecular chaperone regulator 7; Bcl-2-associated athanogene 7 (At5g62390)                                                                                                                                  | -2.033 |
| Cs5g10890                                                              | --                                                                                                                                                                                             | DnaJ protein ERDJ3B; Chaperone protein dnaJ 19; AtDjB19; AtJ19; Endoplasmic reticulum dnaJ domain-containing protein 3B; AtERdj3B; Protein SCJ1 homolog ERDJ3B; Flags: Precursor (At1g18700)                           | 1.034  |
| Cs2g02660                                                              | --                                                                                                                                                                                             | Chaperonin-like RBCX protein 1, chloroplastic {ECO:0000303 PubMed:21922322}; AtRBCX1 {ECO:0000303 PubMed:21922322}; Flags: Precursor (At4g04330)                                                                       | 1.713  |
| Cs2g30320                                                              | --                                                                                                                                                                                             | Chaperonin-like RbcX protein 2, chloroplastic {ECO:0000303 PubMed:21922322}; AtRBCX2 {ECO:0000303 PubMed:21922322}; Flags: Precursor (At5g19850_1)                                                                     | 1.776  |
| orange1.1t01793                                                        | K03768 peptidyl-prolyl cis-trans isomerase B (cyclophilin B) [EC:5.2.1.8]   (RefSeq) peptidyl-prolyl cis-trans isomerase CYP20-3, chloroplastic (A)                                            | Peptidyl-prolyl cis-trans isomerase CYP20-3, chloroplastic; PPIase CYP20-3; EC=5.2.1.8; Cyclophilin of 20 kDa 3; Cyclosporin A-binding protein; Rotamase CYP20-3; Rotamase cyclophilin-4; Flags: Precursor (At3g62030) | 1.032  |
| Cs3g10530                                                              | K09517 DnaJ homolog subfamily B member 11   (RefSeq) dnaJ protein ERDJ3B (A)                                                                                                                   | DnaJ protein ERDJ3B; Chaperone protein dnaJ 19; AtDjB19; AtJ19; Endoplasmic reticulum dnaJ domain-containing protein 3B; AtERdj3B; Protein SCJ1 homolog ERDJ3B; Flags: Precursor (At3g62600)                           | -1.295 |
| <b>Ribosome biogenesis (GO:0042254, P = 1.0000)</b>                    |                                                                                                                                                                                                |                                                                                                                                                                                                                        |        |
| Cs7g07350                                                              | K14816 pre-60S factor REI1   (RefSeq) zinc finger protein 622-like (A)                                                                                                                         | Cytoplasmic 60S subunit biogenesis factor REI1 homolog 1 {ECO:0000305}; Protein REI1-LIKE 1 {ECO:0000303 PubMed:24038679}; pre-60S factor REI1 homolog 1 {ECO:0000305} (At2g24500)                                     | 1.798  |
| Cs3g14210                                                              | K02971 small subunit ribosomal protein S21e   (RefSeq) 40S ribosomal protein S21-2-like (A)                                                                                                    | 40S ribosomal protein S21-2 (At5g27700)                                                                                                                                                                                | -1.463 |
| Cs3g15450                                                              | K12450 UDP-glucose 4,6-dehydratase [EC:4.2.1.76]   (RefSeq) trifunctional UDP-glucose 4,6-dehydratase/UDP-4-keto-6-deoxy-D-glucose 3,5-epimerase/UDP-4-keto-L-rhamnose-reductase RHM1-like (A) | Chloroplast stem-loop binding protein of 41 kDa b, chloroplastic; CSP41-b; Heteroglycan-interacting protein 1.3; Protein CHLOROPLAST RNA BINDING; Protein Gb5f; Flags: Precursor (At1g09340)                           | 2.169  |
| Cs6g12740                                                              | K14569 ribosome biogenesis protein BMS1   (RefSeq) ribosome biogenesis protein BMS1 homolog (A)                                                                                                | (At1g06720)                                                                                                                                                                                                            | -1.209 |
| <b>Translation initiation factor activity (GO:0003743, P = 0.9999)</b> |                                                                                                                                                                                                |                                                                                                                                                                                                                        |        |

|                                                          |                                                                                                                                                                                        |                                                                                                                                                                                                                                                                                                                                                                                                    |        |
|----------------------------------------------------------|----------------------------------------------------------------------------------------------------------------------------------------------------------------------------------------|----------------------------------------------------------------------------------------------------------------------------------------------------------------------------------------------------------------------------------------------------------------------------------------------------------------------------------------------------------------------------------------------------|--------|
| Cs4g05590                                                | K03257 translation initiation factor 4A   (RefSeq) eukaryotic initiation factor 4A-15-like (A)                                                                                         | Eukaryotic initiation factor 4A-9; eIF-4A-9; EC=3.6.4.13; ATP-dependent RNA helicase eIF4A-9 (At3g13920)                                                                                                                                                                                                                                                                                           | -1.514 |
|                                                          |                                                                                                                                                                                        |                                                                                                                                                                                                                                                                                                                                                                                                    |        |
| <b>Other DEGs related to protein biosynthesis</b>        |                                                                                                                                                                                        |                                                                                                                                                                                                                                                                                                                                                                                                    |        |
| Cs6g21070                                                | K02997 small subunit ribosomal protein S9e   (RefSeq) 40S ribosomal protein S9-2 (A)                                                                                                   | 40S ribosomal protein S9-2 (At3g04920)                                                                                                                                                                                                                                                                                                                                                             | -2.498 |
| Cs4g13410                                                | K02957 small subunit ribosomal protein S15Ae   (RefSeq) 40S ribosomal protein S15a-5 (A)                                                                                               | 40S ribosomal protein S15a-5 (At4g29430)                                                                                                                                                                                                                                                                                                                                                           | -1.179 |
| Cs3g16530                                                | K19035 50S ribosomal protein 6   (RefSeq) 50S ribosomal protein 6, chloroplastic (A)                                                                                                   | 50S ribosomal protein 6, chloroplastic; CL25; Plastid-specific 50S ribosomal protein 6; PSRP-6; Flags: Precursor (At5g17870)                                                                                                                                                                                                                                                                       | -1.234 |
| orange1.1t02570                                          | --                                                                                                                                                                                     | Ribosome-binding factor PSRP1, chloroplastic {ECO:0000303 PubMed:10874039}; 30S ribosomal protein 1; CS-S5 {ECO:0000303 PubMed:2693942}; CS5; Plastid-specific 30S ribosomal protein 1 {ECO:0000303 PubMed:2376575}; PSrp-1 {ECO:0000303 PubMed:2376575}; Ribosomal protein 1; S22 {ECO:0000303 PubMed:1731992}; Translation factor pY {ECO:0000303 PubMed:28007896}; Flags: Precursor (At5g24490) | -1.177 |
|                                                          |                                                                                                                                                                                        |                                                                                                                                                                                                                                                                                                                                                                                                    |        |
| <b>Biosynthesis of amino acids (ko01230, P = 0.5379)</b> |                                                                                                                                                                                        |                                                                                                                                                                                                                                                                                                                                                                                                    |        |
| Cs3g23090                                                | K00058 D-3-phosphoglycerate dehydrogenase / 2-oxoglutarate reductase [EC:1.1.1.95 1.1.1.399]   (RefSeq) D-3-phosphoglycerate dehydrogenase 3, chloroplastic-like (A)                   | D-3-phosphoglycerate dehydrogenase 3, chloroplastic; EC=1.1.1.95 {ECO:0000269 PubMed:24368794}; Flags: Precursor (At3g19480)                                                                                                                                                                                                                                                                       | 1.418  |
| novel.818                                                | K00134 glyceraldehyde 3-phosphate dehydrogenase [EC:1.2.1.12]   (RefSeq) glyceraldehyde-3-phosphate dehydrogenase GAPC1, cytosolic (A)                                                 | Glyceraldehyde-3-phosphate dehydrogenase, cytosolic; EC=1.2.1.12; Flags: Fragment (At1g13440)                                                                                                                                                                                                                                                                                                      | -1.068 |
| orange1.1t02489                                          | K00215 4-hydroxy-tetrahydrodipicolinate reductase [EC:1.17.1.8]   (RefSeq) 4-hydroxy-tetrahydrodipicolinate reductase 1, chloroplastic (A)                                             | 4-hydroxy-tetrahydrodipicolinate reductase 2, chloroplastic; HTPA reductase 2; EC=1.17.1.8; Flags: Precursor (At2g31840)                                                                                                                                                                                                                                                                           | 1.216  |
| Cs5g27000                                                | K00549 5-methyltetrahydropteroyltriglutamate--homocysteine methyltransferase [EC:2.1.1.14]   (RefSeq) 5-methyltetrahydropteroyltriglutamate--homocysteine methyltransferase 1 (A)      | 5-methyltetrahydropteroyltriglutamate--homocysteine methyltransferase 1; EC=2.1.1.14; Cobalamin-independent methionine synthase 1; AtMS1; Vitamin-B12-independent methionine synthase 1 (At5g17920)                                                                                                                                                                                                | -1.133 |
| Cs5g27040                                                | K00549 5-methyltetrahydropteroyltriglutamate--homocysteine methyltransferase [EC:2.1.1.14]   (RefSeq) 5-methyltetrahydropteroyltriglutamate--homocysteine methyltransferase 1-like (A) | 5-methyltetrahydropteroyltriglutamate--homocysteine methyltransferase 1; EC=2.1.1.14; Cobalamin-independent methionine synthase 1; AtMS1; Vitamin-B12-independent methionine synthase 1 (At5g17920)                                                                                                                                                                                                | -1.024 |
| novel.780                                                | K00600 glycine hydroxymethyltransferase [EC:2.1.2.1]   (RefSeq) serine hydroxymethyltransferase 3, chloroplastic (A)                                                                   | Serine hydroxymethyltransferase 3, chloroplastic; AtSHMT3; EC=2.1.2.1; Glycine hydroxymethyltransferase 3; Serine methylase 3; Flags: Precursor (At4g32520)                                                                                                                                                                                                                                        | 3.137  |
| Cs5g09210                                                | K00616 transaldolase [EC:2.2.1.2]   (RefSeq) transaldolase (A)                                                                                                                         | (At1g12230)                                                                                                                                                                                                                                                                                                                                                                                        | 1.331  |

|           |                                                                                                                                  |                                                                                                                                                                                                                                                                                                                                  |        |
|-----------|----------------------------------------------------------------------------------------------------------------------------------|----------------------------------------------------------------------------------------------------------------------------------------------------------------------------------------------------------------------------------------------------------------------------------------------------------------------------------|--------|
| Cs4g08990 | K00640 serine O-acetyltransferase [EC:2.3.1.30]   (RefSeq) serine acetyltransferase 1, chloroplastic-like (A)                    | Serine acetyltransferase 3, mitochondrial; AtSAT-3; AtSERAT2; SAT-m; EC=2.3.1.30; Flags: Precursor (At3g13110)                                                                                                                                                                                                                   | 1.245  |
| Cs8g03420 | K00826 branched-chain amino acid aminotransferase [EC:2.6.1.42]   (RefSeq) branched-chain-amino-acid aminotransferase 6-like (A) | Branched-chain amino acid aminotransferase 2, chloroplastic {ECO:0000303 PubMed:23347725}; HIBCAT2 {ECO:0000303 PubMed:23347725}; EC=2.6.1.42 {ECO:0000269 PubMed:23347725}; Flags: Precursor (At1g50110)                                                                                                                        | 2.136  |
| Cs1g15970 | K00850 6-phosphofructokinase 1 [EC:2.7.1.11]   (RefSeq) ATP-dependent 6-phosphofructokinase 3-like (A)                           | ATP-dependent 6-phosphofructokinase 3 {ECO:0000255 HAMAP-Rule:MF_03186}; ATP-PFK 3 {ECO:0000255 HAMAP-Rule:MF_03186}; Phosphofructokinase 3 {ECO:0000255 HAMAP-Rule:MF_03186}; EC=2.7.1.11 {ECO:0000255 HAMAP-Rule:MF_03186}; Phosphohexokinase 3 {ECO:0000255 HAMAP-Rule:MF_03186} (At4g29220)                                  | 1.165  |
| Cs1g20200 | K00850 6-phosphofructokinase 1 [EC:2.7.1.11]   (RefSeq) ATP-dependent 6-phosphofructokinase 5, chloroplastic (A)                 | ATP-dependent 6-phosphofructokinase 5, chloroplastic {ECO:0000255 HAMAP-Rule:MF_03186}; ATP-PFK 5 {ECO:0000255 HAMAP-Rule:MF_03186}; Phosphofructokinase 5 {ECO:0000255 HAMAP-Rule:MF_03186}; EC=2.7.1.11 {ECO:0000255 HAMAP-Rule:MF_03186}; Phosphohexokinase 5 {ECO:0000255 HAMAP-Rule:MF_03186}; Flags: Precursor (At2g22480) | 1.593  |
| Cs4g18980 | K00850 6-phosphofructokinase 1 [EC:2.7.1.11]   (RefSeq) ATP-dependent 6-phosphofructokinase 6 (A)                                | ATP-dependent 6-phosphofructokinase 3 {ECO:0000255 HAMAP-Rule:MF_03186}; ATP-PFK 3 {ECO:0000255 HAMAP-Rule:MF_03186}; Phosphofructokinase 3 {ECO:0000255 HAMAP-Rule:MF_03186}; EC=2.7.1.11 {ECO:0000255 HAMAP-Rule:MF_03186}; Phosphohexokinase 3 {ECO:0000255 HAMAP-Rule:MF_03186} (At4g32840)                                  | -2.038 |
| Cs8g03650 | K00873 pyruvate kinase [EC:2.7.1.40]   (RefSeq) pyruvate kinase isozyme A, chloroplastic-like (A)                                | Pyruvate kinase isozyme A, chloroplastic; EC=2.7.1.40; Flags: Precursor (At3g22960)                                                                                                                                                                                                                                              | 2.299  |
| Cs9g07880 | K00873 pyruvate kinase [EC:2.7.1.40]   (RefSeq) pyruvate kinase isozyme A, chloroplastic (A)                                     | Pyruvate kinase isozyme A, chloroplastic; EC=2.7.1.40; Flags: Precursor (At3g22960)                                                                                                                                                                                                                                              | 1.213  |
| Cs9g18710 | K00873 pyruvate kinase [EC:2.7.1.40]   (RefSeq) plastidial pyruvate kinase 2 (A)                                                 | Plastidial pyruvate kinase 2; PKp2; EC=2.7.1.40; Plastidial pyruvate kinase 1; PKP1; Pyruvate kinase III; Pyruvate kinase isozyme B1, chloroplastic; PKP-BETA1; Plastidic pyruvate kinase beta subunit 1; Flags: Precursor (At5g52920)                                                                                           | 1.963  |
| Cs2g14460 | K00928 aspartate kinase [EC:2.7.2.4]   (RefSeq) aspartokinase 2, chloroplastic-like (A)                                          | Aspartokinase 3, chloroplastic; EC=2.7.2.4; Aspartate kinase 3; Flags: Precursor (At3g02020)                                                                                                                                                                                                                                     | -1.272 |
| Cs5g35310 | K01652 acetolactate synthase I/II/III large subunit [EC:2.2.1.6]   (RefSeq) acetolactate synthase 3, chloroplastic-like (A)      | Acetolactate synthase 3, chloroplastic; EC=2.2.1.6; ALS III; Acetohydroxy-acid synthase III; Acetolactate synthase III; Flags: Precursor (At3g48560)                                                                                                                                                                             | -1.419 |
| Cs2g12755 | K01657 anthranilate synthase component I [EC:4.1.3.27]   (RefSeq) anthranilate synthase alpha subunit 2, chloroplastic (A)       | --                                                                                                                                                                                                                                                                                                                               | 1.350  |
| Cs2g17930 | K01658 anthranilate synthase component II [EC:4.1.3.27]   (RefSeq) anthranilate synthase beta subunit 2, chloroplastic-like (A)  | Anthranilate synthase beta subunit 1, chloroplastic; EC=4.1.3.27; Anthranilate synthase component 2-1; Anthranilate synthase, glutamine amidotransferase                                                                                                                                                                         | -1.192 |

|                 |                                                                                                                                                                                           |                                                                                                                                                                                                                                                                                       |        |
|-----------------|-------------------------------------------------------------------------------------------------------------------------------------------------------------------------------------------|---------------------------------------------------------------------------------------------------------------------------------------------------------------------------------------------------------------------------------------------------------------------------------------|--------|
|                 |                                                                                                                                                                                           | component 2-1; Protein TRYPTOPHAN BIOSYNTHESIS 4; Protein WEAK ETHYLENE INSENSITIVE 7; Flags: Precursor (At1g25220)                                                                                                                                                                   |        |
| Cs7g26180       | K01689 enolase [EC:4.2.1.11]   (RefSeq) enolase 1, chloroplastic (A)                                                                                                                      | Enolase 1, chloroplastic; EC=4.2.1.11; 2-phospho-D-glycerate hydro-lyase 1; 2-phosphoglycerate dehydratase 1; Flags: Precursor (At1g74030)                                                                                                                                            | 1.238  |
| Cs2g07700       | K01696 tryptophan synthase beta chain [EC:4.2.1.20]   (RefSeq) tryptophan synthase beta chain 1 (A)                                                                                       | Tryptophan synthase beta chain 2, chloroplastic; EC=4.2.1.20; Flags: Precursor (At4g27070)                                                                                                                                                                                            | -3.378 |
| Cs3g11500       | K01738 cysteine synthase A [EC:2.5.1.47]   (RefSeq) bifunctional L-3-cyanoalanine synthase/cysteine synthase D2-like (A)                                                                  | Bifunctional L-3-cyanoalanine synthase/cysteine synthase D2; EC=2.5.1.47 {ECO:0000269 PubMed:10845460}; EC=4.4.1.9 {ECO:0000269 PubMed:10845460}; Beta-substituted Ala synthase 4;2; ARATH-Bsas4;2; Cysteine synthase D2; AtcysD2; O-acetylserine (thiol)-lyase 6 (At5g28020)         | 1.614  |
| novel.1307      | K01738 cysteine synthase A [EC:2.5.1.47]   (RefSeq) cysteine synthase-like (A)                                                                                                            | --                                                                                                                                                                                                                                                                                    | 1.632  |
| Cs7g32500       | K01803 triosephosphate isomerase (TIM) [EC:5.3.1.1]   (RefSeq) triosephosphate isomerase, cytosolic (A)                                                                                   | Triosephosphate isomerase, cytosolic; TIM; Triose-phosphate isomerase; EC=5.3.1.1 (At3g55440)                                                                                                                                                                                         | -1.019 |
| Cs7g14020       | K01915 glutamine synthetase [EC:6.3.1.2]   (RefSeq) glutamine synthetase nodule isozyme (A)                                                                                               | Glutamine synthetase nodule isozyme; GS; EC=6.3.1.2; Glutamate--ammonia ligase (At5g37600)                                                                                                                                                                                            | 1.025  |
| Cs9g05680       | K01915 glutamine synthetase [EC:6.3.1.2]   (RefSeq) glutamine synthetase leaf isozyme, chloroplastic (A)                                                                                  | Glutamine synthetase, chloroplastic; EC=6.3.1.2; GS2; Glutamate--ammonia ligase; Flags: Precursor (At5g35630)                                                                                                                                                                         | 1.892  |
| Cs2g06290       | K01953 asparagine synthase (glutamine-hydrolysing) [EC:6.3.5.4]   (RefSeq) asparagine synthetase [glutamine-hydrolyzing] 1 (A)                                                            | Stem-specific protein TSJT1 (At4g27450)                                                                                                                                                                                                                                               | -3.075 |
| Cs2g03010       | K05359 arogenate/prephenate dehydratase [EC:4.2.1.91 4.2.1.51]   (RefSeq) arogenate dehydratase/prephenate dehydratase 1, chloroplastic (A)                                               | Arogenate dehydratase/prephenate dehydratase 1, chloroplastic; AtADT1; AtPDT1; EC=4.2.1.51; EC=4.2.1.91; Flags: Precursor (At1g11790)                                                                                                                                                 | -1.591 |
| Cs7g31990       | K12657 delta-1-pyrroline-5-carboxylate synthetase [EC:2.7.2.11 1.2.1.41]   (RefSeq) delta-1-pyrroline-5-carboxylate synthase (A)                                                          | Delta-1-pyrroline-5-carboxylate synthase; P5CS; Includes: Glutamate 5-kinase; GK; EC=2.7.2.11; Gamma-glutamyl kinase; Includes: Gamma-glutamyl phosphate reductase; GPR; EC=1.2.1.41; Glutamate-5-semialdehyde dehydrogenase; Glutamyl-gamma-semialdehyde dehydrogenase (At3g55610 2) | -2.251 |
| orange1.1t03059 | K12657 delta-1-pyrroline-5-carboxylate synthetase [EC:2.7.2.11 1.2.1.41]   (RefSeq) delta-1-pyrroline-5-carboxylate synthase-like (A)                                                     | Delta-1-pyrroline-5-carboxylate synthase; P5CS; Includes: Glutamate 5-kinase; GK; EC=2.7.2.11; Gamma-glutamyl kinase; Includes: Gamma-glutamyl phosphate reductase; GPR; EC=1.2.1.41; Glutamate-5-semialdehyde dehydrogenase; Glutamyl-gamma-semialdehyde dehydrogenase (At2g39800 2) | -1.687 |
| orange1.1t00386 | K13034 L-3-cyanoalanine synthase/ cysteine synthase [EC:2.5.1.47 4.4.1.9]   (RefSeq) bifunctional L-3-cyanoalanine synthase/cysteine synthase 1, mitochondrial (A)                        | L-3-cyanoalanine synthase 2, mitochondrial; MdCAS2; EC=4.4.1.9; Flags: Precursor (At3g61440)                                                                                                                                                                                          | 4.935  |
| Cs3g12230       | K13832 3-dehydroquinate dehydratase / shikimate dehydrogenase [EC:4.2.1.10 1.1.1.25]   (RefSeq) bifunctional 3-dehydroquinate dehydratase/shikimate dehydrogenase, chloroplastic-like (A) | Bifunctional 3-dehydroquinate dehydratase/shikimate dehydrogenase, chloroplastic; DHQ-SDH protein; DHQase-SORase; Protein EMBRYO DEFECTIVE 3004; Includes: Dehydroquinate dehydratase; DHQ; EC=4.2.1.10;                                                                              | -1.234 |

|                                                                                  |                                                                                                                                       |                                                                                                                                                                                                                                                                                       |        |
|----------------------------------------------------------------------------------|---------------------------------------------------------------------------------------------------------------------------------------|---------------------------------------------------------------------------------------------------------------------------------------------------------------------------------------------------------------------------------------------------------------------------------------|--------|
|                                                                                  |                                                                                                                                       | Includes: Shikimate dehydrogenase; SDH; EC=1.1.1.25; Flags: Precursor (At3g06350)                                                                                                                                                                                                     |        |
| Cs4g16050                                                                        | K14454 aspartate aminotransferase, cytoplasmic [EC:2.6.1.1]   (RefSeq) aspartate aminotransferase, cytoplasmic (A)                    | Aspartate aminotransferase, cytoplasmic; EC=2.6.1.1; Transaminase A (At5g11520)                                                                                                                                                                                                       | -1.328 |
| Cs2g15280                                                                        | K14455 aspartate aminotransferase, mitochondrial [EC:2.6.1.1]   (RefSeq) aspartate aminotransferase, mitochondrial-like (A)           | Aspartate aminotransferase, mitochondrial; EC=2.6.1.1; Transaminase A; Flags: Precursor (At2g30970)                                                                                                                                                                                   | -1.142 |
| Cs4g05200                                                                        | K15227 arogenate dehydrogenase (NADP+), plant [EC:1.3.1.78]   (RefSeq) arogenate dehydrogenase 1, chloroplastic (A)                   | Arogenate dehydrogenase 1, chloroplastic; EC=1.3.1.78; TYRATC; TyrAAT1; Flags: Precursor (At5g34930)                                                                                                                                                                                  | -1.581 |
| <b>Arginine biosynthesis (ko00220, P = 0.4894)</b>                               |                                                                                                                                       |                                                                                                                                                                                                                                                                                       |        |
| Cs7g19160                                                                        | K00261 glutamate dehydrogenase (NAD(P)+) [EC:1.4.1.3]   (RefSeq) glutamate dehydrogenase 2 (A)                                        | Glutamate dehydrogenase 2; GDH 2; EC=1.4.1.3 (At5g07440)                                                                                                                                                                                                                              | -2.490 |
| Cs7g14020                                                                        | K01915 glutamine synthetase [EC:6.3.1.2]   (RefSeq) glutamine synthetase nodule isozyme (A)                                           | Glutamine synthetase nodule isozyme; GS; EC=6.3.1.2; Glutamate--ammonia ligase (At5g37600)                                                                                                                                                                                            | 1.025  |
| Cs9g05680                                                                        | K01915 glutamine synthetase [EC:6.3.1.2]   (RefSeq) glutamine synthetase leaf isozyme, chloroplastic (A)                              | Glutamine synthetase, chloroplastic; EC=6.3.1.2; GS2; Glutamate--ammonia ligase; Flags: Precursor (At5g35630)                                                                                                                                                                         | 1.892  |
| Cs4g16050                                                                        | K14454 aspartate aminotransferase, cytoplasmic [EC:2.6.1.1]   (RefSeq) aspartate aminotransferase, cytoplasmic (A)                    | Aspartate aminotransferase, cytoplasmic; EC=2.6.1.1; Transaminase A (At5g11520)                                                                                                                                                                                                       | -1.328 |
| Cs2g15280                                                                        | K14455 aspartate aminotransferase, mitochondrial [EC:2.6.1.1]   (RefSeq) aspartate aminotransferase, mitochondrial-like (A)           | Aspartate aminotransferase, mitochondrial; EC=2.6.1.1; Transaminase A; Flags: Precursor (At2g30970)                                                                                                                                                                                   | -1.142 |
| <b>Proline biosynthetic process (GO:0006561, P = 0.5470)</b>                     |                                                                                                                                       |                                                                                                                                                                                                                                                                                       |        |
| Cs7g31990                                                                        | K12657 delta-1-pyrroline-5-carboxylate synthetase [EC:2.7.2.11 1.2.1.41]   (RefSeq) delta-1-pyrroline-5-carboxylate synthase (A)      | Delta-1-pyrroline-5-carboxylate synthase; P5CS; Includes: Glutamate 5-kinase; GK; EC=2.7.2.11; Gamma-glutamyl kinase; Includes: Gamma-glutamyl phosphate reductase; GPR; EC=1.2.1.41; Glutamate-5-semialdehyde dehydrogenase; Glutamyl-gamma-semialdehyde dehydrogenase (At3g55610_2) | -2.251 |
| orange1.1t03059                                                                  | K12657 delta-1-pyrroline-5-carboxylate synthetase [EC:2.7.2.11 1.2.1.41]   (RefSeq) delta-1-pyrroline-5-carboxylate synthase-like (A) | Delta-1-pyrroline-5-carboxylate synthase; P5CS; Includes: Glutamate 5-kinase; GK; EC=2.7.2.11; Gamma-glutamyl kinase; Includes: Gamma-glutamyl phosphate reductase; GPR; EC=1.2.1.41; Glutamate-5-semialdehyde dehydrogenase; Glutamyl-gamma-semialdehyde dehydrogenase (At2g39800_2) | -1.687 |
| <b>Phenylalanine, tyrosine and tryptophan biosynthesis (ko00400, P = 0.2174)</b> |                                                                                                                                       |                                                                                                                                                                                                                                                                                       |        |
| Cs2g23850                                                                        | K00815 tyrosine aminotransferase [EC:2.6.1.5]   (RefSeq) probable aminotransferase TAT2 (A)                                           | Probable aminotransferase TAT2; EC=2.6.1.-; Tyrosine aminotransferase 2 (At5g53970)                                                                                                                                                                                                   | 1.040  |
| Cs2g23860                                                                        | K00815 tyrosine aminotransferase [EC:2.6.1.5]   (RefSeq) probable aminotransferase TAT2 (A)                                           | Probable aminotransferase TAT2; EC=2.6.1.-; Tyrosine aminotransferase 2 (At5g53970)                                                                                                                                                                                                   | 2.234  |

|                                                                          |                                                                                                                                                                                           |                                                                                                                                                                                                                                                                                            |        |
|--------------------------------------------------------------------------|-------------------------------------------------------------------------------------------------------------------------------------------------------------------------------------------|--------------------------------------------------------------------------------------------------------------------------------------------------------------------------------------------------------------------------------------------------------------------------------------------|--------|
| Cs2g12755                                                                | K01657 anthranilate synthase component I [EC:4.1.3.27]   (RefSeq) anthranilate synthase alpha subunit 2, chloroplastic (A)                                                                | --                                                                                                                                                                                                                                                                                         | 1.350  |
| Cs2g17930                                                                | K01658 anthranilate synthase component II [EC:4.1.3.27]   (RefSeq) anthranilate synthase beta subunit 2, chloroplastic-like (A)                                                           | Anthranilate synthase beta subunit 1, chloroplastic; EC=4.1.3.27; Anthranilate synthase component 2-1; Anthranilate synthase, glutamine amidotransferase component 2-1; Protein TRYPTOPHAN BIOSYNTHESIS 4; Protein WEAK ETHYLENE INSENSITIVE 7; Flags: Precursor (At1g25220)               | -1.192 |
| Cs2g07700                                                                | K01696 tryptophan synthase beta chain [EC:4.2.1.20]   (RefSeq) tryptophan synthase beta chain 1 (A)                                                                                       | Tryptophan synthase beta chain 2, chloroplastic; EC=4.2.1.20; Flags: Precursor (At4g27070)                                                                                                                                                                                                 | -3.378 |
| Cs2g03010                                                                | K05359 arogenate/prephenate dehydratase [EC:4.2.1.91 4.2.1.51]   (RefSeq) arogenate dehydratase/prephenate dehydratase 1, chloroplastic (A)                                               | Arogenate dehydratase/prephenate dehydratase 1, chloroplastic; AtADT1; AtPDT1; EC=4.2.1.51; EC=4.2.1.91; Flags: Precursor (At1g11790)                                                                                                                                                      | -1.591 |
| Cs3g12230                                                                | K13832 3-dehydroquinate dehydratase / shikimate dehydrogenase [EC:4.2.1.10 1.1.1.25]   (RefSeq) bifunctional 3-dehydroquinate dehydratase/shikimate dehydrogenase, chloroplastic-like (A) | Bifunctional 3-dehydroquinate dehydratase/shikimate dehydrogenase, chloroplastic; DHQ-SDH protein; DHQase-SORase; Protein EMBRYO DEFECTIVE 3004; Includes: Dehydroquinate dehydratase; DHQ; EC=4.2.1.10; Includes: Shikimate dehydrogenase; SDH; EC=1.1.1.25; Flags: Precursor (At3g06350) | -1.234 |
| Cs4g16050                                                                | K14454 aspartate aminotransferase, cytoplasmic [EC:2.6.1.1]   (RefSeq) aspartate aminotransferase, cytoplasmic (A)                                                                        | Aspartate aminotransferase, cytoplasmic; EC=2.6.1.1; Transaminase A (At5g11520)                                                                                                                                                                                                            | -1.328 |
| Cs2g15280                                                                | K14455 aspartate aminotransferase, mitochondrial [EC:2.6.1.1]   (RefSeq) aspartate aminotransferase, mitochondrial-like (A)                                                               | Aspartate aminotransferase, mitochondrial; EC=2.6.1.1; Transaminase A; Flags: Precursor (At2g30970)                                                                                                                                                                                        | -1.142 |
| Cs4g05200                                                                | K15227 arogenate dehydrogenase (NADP+), plant [EC:1.3.1.78]   (RefSeq) arogenate dehydrogenase 1, chloroplastic (A)                                                                       | Arogenate dehydrogenase 1, chloroplastic; EC=1.3.1.78; TYRATC; TyrAAT1; Flags: Precursor (At5g34930)                                                                                                                                                                                       | -1.581 |
|                                                                          |                                                                                                                                                                                           |                                                                                                                                                                                                                                                                                            |        |
| <b>Valine, leucine and isoleucine biosynthesis (ko00290, P = 0.9033)</b> |                                                                                                                                                                                           |                                                                                                                                                                                                                                                                                            |        |
| Cs8g03420                                                                | K00826 branched-chain amino acid aminotransferase [EC:2.6.1.42]   (RefSeq) branched-chain-amino-acid aminotransferase 6-like (A)                                                          | Branched-chain amino acid aminotransferase 2, chloroplastic {ECO:0000303 PubMed:23347725}; HIBCAT2 {ECO:0000303 PubMed:23347725}; EC=2.6.1.42 {ECO:0000269 PubMed:23347725}; Flags: Precursor (At1g50110)                                                                                  | 2.136  |
| Cs5g35310                                                                | K01652 acetolactate synthase I/II/III large subunit [EC:2.2.1.6]   (RefSeq) acetolactate synthase 3, chloroplastic-like (A)                                                               | Acetolactate synthase 3, chloroplastic; EC=2.2.1.6; ALS III; Acetohydroxy-acid synthase III; Acetolactate synthase III; Flags: Precursor (At3g48560)                                                                                                                                       | -1.419 |
|                                                                          |                                                                                                                                                                                           |                                                                                                                                                                                                                                                                                            |        |
| <b>Lysine biosynthesis (ko00300, P = 0.6148)</b>                         |                                                                                                                                                                                           |                                                                                                                                                                                                                                                                                            |        |
| orange1.1t02489                                                          | K00215 4-hydroxy-tetrahydrodipicolinate reductase [EC:1.17.1.8]   (RefSeq) 4-hydroxy-tetrahydrodipicolinate reductase 1, chloroplastic (A)                                                | 4-hydroxy-tetrahydrodipicolinate reductase 2, chloroplastic; HTPA reductase 2; EC=1.17.1.8; Flags: Precursor (At2g31840)                                                                                                                                                                   | 1.216  |
| Cs2g14460                                                                | K00928 aspartate kinase [EC:2.7.2.4]   (RefSeq) aspartokinase 2, chloroplastic-like (A)                                                                                                   | Aspartokinase 3, chloroplastic; EC=2.7.2.4; Aspartate kinase 3; Flags: Precursor (At3g02020)                                                                                                                                                                                               | -1.272 |
|                                                                          |                                                                                                                                                                                           |                                                                                                                                                                                                                                                                                            |        |

|                                                                              |                                                                                                                                                                                                                                                                                              |                                                                                                                                                                                                                                                                                                                                                                            |        |
|------------------------------------------------------------------------------|----------------------------------------------------------------------------------------------------------------------------------------------------------------------------------------------------------------------------------------------------------------------------------------------|----------------------------------------------------------------------------------------------------------------------------------------------------------------------------------------------------------------------------------------------------------------------------------------------------------------------------------------------------------------------------|--------|
| <b>Cellular amino acid catabolic process (GO:0009063, P = 0.4335)</b>        |                                                                                                                                                                                                                                                                                              |                                                                                                                                                                                                                                                                                                                                                                            |        |
| Cs3g14590                                                                    | --                                                                                                                                                                                                                                                                                           | Protein PHYLLO, chloroplastic; Includes: Inactive isochorismate synthase; MENF; Includes: 2-succinyl-5-enolpyruvyl-6-hydroxy-3-cyclohexene-1-carboxylate synthase; EC=2.2.1.9; MEND; Includes: o-succinylbenzoate synthase; EC=4.2.1.113; MENC; Includes: 2-succinyl-6-hydroxy-2,4-cyclohexadiene-1-carboxylate synthase; EC=4.2.99.20; MENH; Flags: Precursor (At3g05600) | 3.596  |
| Cs2g23860                                                                    | K00815 tyrosine aminotransferase [EC:2.6.1.5]   (RefSeq) probable aminotransferase TAT2 (A)                                                                                                                                                                                                  | Probable aminotransferase TAT2; EC=2.6.1.-; Tyrosine aminotransferase 2 (At5g53970)                                                                                                                                                                                                                                                                                        | 2.234  |
| Cs7g12250                                                                    | K14759 isochorismate synthase / 2-succinyl-5-enolpyruvyl-6-hydroxy-3-cyclohexene-1-carboxylate synthase / 2-succinyl-6-hydroxy-2,4-cyclohexadiene-1-carboxylate synthase / O-succinylbenzoate synthase [EC:5.4.4.2 2.2.1.9 4.2.99.20 4.2.1.113]   (RefSeq) protein PHYLLO, chloroplastic (A) | Protein PHYLLO, chloroplastic; Includes: Inactive isochorismate synthase; MENF; Includes: 2-succinyl-5-enolpyruvyl-6-hydroxy-3-cyclohexene-1-carboxylate synthase; EC=2.2.1.9; MEND; Includes: o-succinylbenzoate synthase; EC=4.2.1.113; MENC; Includes: 2-succinyl-6-hydroxy-2,4-cyclohexadiene-1-carboxylate synthase; EC=4.2.99.20; MENH; Flags: Precursor (At1g68890) | 1.367  |
| orange1.1t03248                                                              | K17761 succinate-semialdehyde dehydrogenase, mitochondrial [EC:1.2.1.24]   (RefSeq) succinate-semialdehyde dehydrogenase, mitochondrial (A)                                                                                                                                                  | Succinate-semialdehyde dehydrogenase, mitochondrial; At-SSADH1; EC=1.2.1.24; Aldehyde dehydrogenase family 5 member F1; NAD(+)-dependent succinic semialdehyde dehydrogenase; Flags: Precursor (At1g79440)                                                                                                                                                                 | 1.373  |
| Cs8g07560                                                                    | K01583 arginine decarboxylase [EC:4.1.1.19]   (RefSeq) arginine decarboxylase-like (A)                                                                                                                                                                                                       | Arginine decarboxylase; ADC; ARGDC; EC=4.1.1.19 (At2g16500)                                                                                                                                                                                                                                                                                                                | -1.076 |
| Cs3g04530                                                                    | K00020 3-hydroxyisobutyrate dehydrogenase [EC:1.1.1.31]   (RefSeq) probable 3-hydroxyisobutyrate dehydrogenase-like 3, mitochondrial (A)                                                                                                                                                     | Probable 3-hydroxyisobutyrate dehydrogenase-like 3, mitochondrial; HIBADH-like; EC=1.1.1.31 (At1g71180)                                                                                                                                                                                                                                                                    | -2.032 |
| Cs2g23850                                                                    | K00815 tyrosine aminotransferase [EC:2.6.1.5]   (RefSeq) probable aminotransferase TAT2 (A)                                                                                                                                                                                                  | Probable aminotransferase TAT2; EC=2.6.1.-; Tyrosine aminotransferase 2 (At5g53970)                                                                                                                                                                                                                                                                                        | 1.040  |
| orange1.1t01892                                                              | K01251 adenosylhomocysteinase [EC:3.3.1.1]   (RefSeq) adenosylhomocysteinase (A)                                                                                                                                                                                                             | Adenosylhomocysteinase; AdoHcyase; EC=3.3.1.1; S-adenosyl-L-homocysteine hydrolase (At4g13940)                                                                                                                                                                                                                                                                             | -1.026 |
| Cs4g18520                                                                    | K00281 glycine dehydrogenase [EC:1.4.4.2]   (RefSeq) glycine dehydrogenase (decarboxylating), mitochondrial (A)                                                                                                                                                                              | Glycine dehydrogenase (decarboxylating) A, mitochondrial; EC=1.4.4.2; Glycine cleavage system P protein A; Glycine decarboxylase A; Glycine dehydrogenase (aminomethyl-transferring) A; Flags: Precursor (At4g33010)                                                                                                                                                       | -1.360 |
| Cs7g22860                                                                    | K02437 glycine cleavage system H protein   (RefSeq) glycine cleavage system H protein, mitochondrial (A)                                                                                                                                                                                     | Glycine cleavage system H protein, mitochondrial; Flags: Precursor (At1g32470)                                                                                                                                                                                                                                                                                             | -1.613 |
| <b>Aromatic amino acid family catabolic process (GO:0009074, P = 0.8170)</b> |                                                                                                                                                                                                                                                                                              |                                                                                                                                                                                                                                                                                                                                                                            |        |
| Cs2g23860                                                                    | K00815 tyrosine aminotransferase [EC:2.6.1.5]   (RefSeq) probable aminotransferase TAT2 (A)                                                                                                                                                                                                  | Probable aminotransferase TAT2; EC=2.6.1.-; Tyrosine aminotransferase 2 (At5g53970)                                                                                                                                                                                                                                                                                        | 2.234  |
| Cs2g23850                                                                    | K00815 tyrosine aminotransferase [EC:2.6.1.5]   (RefSeq) probable aminotransferase TAT2 (A)                                                                                                                                                                                                  | Probable aminotransferase TAT2; EC=2.6.1.-; Tyrosine aminotransferase 2 (At5g53970)                                                                                                                                                                                                                                                                                        | 1.040  |

|                                                                         |                                                                                                                                          |                                                                                                                                                                                                                                  |        |
|-------------------------------------------------------------------------|------------------------------------------------------------------------------------------------------------------------------------------|----------------------------------------------------------------------------------------------------------------------------------------------------------------------------------------------------------------------------------|--------|
|                                                                         |                                                                                                                                          |                                                                                                                                                                                                                                  |        |
| <b>Valine, leucine and isoleucine degradation (ko00280, P = 0.9792)</b> |                                                                                                                                          |                                                                                                                                                                                                                                  |        |
| Cs3g04530                                                               | K00020 3-hydroxyisobutyrate dehydrogenase [EC:1.1.1.31]   (RefSeq) probable 3-hydroxyisobutyrate dehydrogenase-like 3, mitochondrial (A) | Probable 3-hydroxyisobutyrate dehydrogenase-like 3, mitochondrial; HIBADH-like; EC=1.1.1.31 (At1g71180)                                                                                                                          | -2.032 |
| Cs9g03990                                                               | K00249 acyl-CoA dehydrogenase [EC:1.3.8.7]   (RefSeq) probable acyl-CoA dehydrogenase IBR3 (A)                                           | Probable acyl-CoA dehydrogenase IBR3 {ECO:0000305}; EC=1.3.99.- {ECO:0000305}; Protein INDOLE-3-BUTYRIC ACID RESPONSE 3 {ECO:0000303 PubMed:17277896} (At3g06810)                                                                | 1.044  |
| Cs9g02470                                                               | K00382 dihydrolipoamide dehydrogenase [EC:1.8.1.4]   (RefSeq) dihydrolipoyl dehydrogenase 2, chloroplastic-like (A)                      | Dihydrolipoyl dehydrogenase 1, chloroplastic; ptLPD1; EC=1.8.1.4; Dihydrolipoamide dehydrogenase 1; Protein LIPOAMIDE DEHYDROGENASE 1; Pyruvate dehydrogenase complex E3 subunit 1; E3-1; PDC-E3 1; Flags: Precursor (At3g16950) | 2.130  |
| Cs8g03420                                                               | K00826 branched-chain amino acid aminotransferase [EC:2.6.1.42]   (RefSeq) branched-chain-amino-acid aminotransferase 6-like (A)         | Branched-chain amino acid aminotransferase 2, chloroplastic {ECO:0000303 PubMed:23347725}; HIBCAT2 {ECO:0000303 PubMed:23347725}; EC=2.6.1.42 {ECO:0000269 PubMed:23347725}; Flags: Precursor (At1g50110)                        | 2.136  |
|                                                                         |                                                                                                                                          |                                                                                                                                                                                                                                  |        |
| <b>Lysine degradation (ko00310, P = 0.9725)</b>                         |                                                                                                                                          |                                                                                                                                                                                                                                  |        |
| Cs1g06440                                                               | K00306 sarcosine oxidase / L-pipecolate oxidase [EC:1.5.3.1 1.5.3.7]   (RefSeq) probable sarcosine oxidase (A)                           | Probable sarcosine oxidase; EC=1.5.3.1 (At2g24580)                                                                                                                                                                               | -1.536 |
| Cs7g07120                                                               | K00306 sarcosine oxidase / L-pipecolate oxidase [EC:1.5.3.1 1.5.3.7]   (RefSeq) probable sarcosine oxidase (A)                           | Probable sarcosine oxidase; EC=1.5.3.1 (At2g24580)                                                                                                                                                                               | -1.254 |
| Cs9g02470                                                               | K00382 dihydrolipoamide dehydrogenase [EC:1.8.1.4]   (RefSeq) dihydrolipoyl dehydrogenase 2, chloroplastic-like (A)                      | Dihydrolipoyl dehydrogenase 1, chloroplastic; ptLPD1; EC=1.8.1.4; Dihydrolipoamide dehydrogenase 1; Protein LIPOAMIDE DEHYDROGENASE 1; Pyruvate dehydrogenase complex E3 subunit 1; E3-1; PDC-E3 1; Flags: Precursor (At3g16950) | 2.130  |
|                                                                         |                                                                                                                                          |                                                                                                                                                                                                                                  |        |
| <b>Arginine and proline metabolism (ko00330, P = 0.4160)</b>            |                                                                                                                                          |                                                                                                                                                                                                                                  |        |
| Cs8g09350                                                               | K01426 amidase [EC:3.5.1.4]   (RefSeq) probable amidase At4g34880 (A)                                                                    | Probable amidase At4g34880 {ECO:0000305}; EC=3.5.1.4 {ECO:0000250 UniProtKB:Q9FR37} (At4g34880)                                                                                                                                  | -3.018 |
| Cs8g07560                                                               | K01583 arginine decarboxylase [EC:4.1.1.19]   (RefSeq) arginine decarboxylase-like (A)                                                   | Arginine decarboxylase; ADC; ARGDC; EC=4.1.1.19 (At2g16500)                                                                                                                                                                      | -1.076 |
| Cs4g02260                                                               | K01611 S-adenosylmethionine decarboxylase [EC:4.1.1.50]   (RefSeq) S-adenosylmethionine decarboxylase proenzyme-like (A)                 | S-adenosylmethionine decarboxylase proenzyme; AdoMetDC; SAMDC; EC=4.1.1.50; Contains: S-adenosylmethionine decarboxylase alpha chain; Contains: S-adenosylmethionine decarboxylase beta chain; Flags: Precursor (At3g25570)      | 1.137  |

|                                                                 |                                                                                                                                       |                                                                                                                                                                                                                                                                                       |                            |
|-----------------------------------------------------------------|---------------------------------------------------------------------------------------------------------------------------------------|---------------------------------------------------------------------------------------------------------------------------------------------------------------------------------------------------------------------------------------------------------------------------------------|----------------------------|
| Cs4g14150                                                       | K12259 spermine oxidase [EC:1.5.3.16 1.5.3.-]   (RefSeq) probable polyamine oxidase 5 (A)                                             | Probable polyamine oxidase 5; AtPAO5; EC=1.5.3.- (At4g29720)                                                                                                                                                                                                                          | -1.445                     |
| Cs7g31990                                                       | K12657 delta-1-pyrroline-5-carboxylate synthetase [EC:2.7.2.11 1.2.1.41]   (RefSeq) delta-1-pyrroline-5-carboxylate synthase (A)      | Delta-1-pyrroline-5-carboxylate synthase; P5CS; Includes: Glutamate 5-kinase; GK; EC=2.7.2.11; Gamma-glutamyl kinase; Includes: Gamma-glutamyl phosphate reductase; GPR; EC=1.2.1.41; Glutamate-5-semialdehyde dehydrogenase; Glutamyl-gamma-semialdehyde dehydrogenase (At3g55610_2) | -2.251                     |
| orange1.1t03059                                                 | K12657 delta-1-pyrroline-5-carboxylate synthetase [EC:2.7.2.11 1.2.1.41]   (RefSeq) delta-1-pyrroline-5-carboxylate synthase-like (A) | Delta-1-pyrroline-5-carboxylate synthase; P5CS; Includes: Glutamate 5-kinase; GK; EC=2.7.2.11; Gamma-glutamyl kinase; Includes: Gamma-glutamyl phosphate reductase; GPR; EC=1.2.1.41; Glutamate-5-semialdehyde dehydrogenase; Glutamyl-gamma-semialdehyde dehydrogenase (At2g39800_2) | -1.687                     |
| Cs7g02060                                                       | K13366 polyamine oxidase [EC:1.5.3.14 1.5.3.16 1.5.3.-]   (RefSeq) polyamine oxidase 1 (A)                                            | Polyamine oxidase 1; AtPAO1; EC=1.5.3.16; N(1)-acetylpolyamine oxidase; Spermine oxidase (At5g13700)                                                                                                                                                                                  | -1.508                     |
| Cs7g23670                                                       | K13366 polyamine oxidase [EC:1.5.3.14 1.5.3.16 1.5.3.-]   (RefSeq) polyamine oxidase-like (A)                                         | Polyamine oxidase; EC=1.5.3.14; EC=1.5.3.15; Flags: Precursor (At5g13700)                                                                                                                                                                                                             | -2.661                     |
| Cs7g23790                                                       | K13366 polyamine oxidase [EC:1.5.3.14 1.5.3.16 1.5.3.-]   (RefSeq) polyamine oxidase-like (A)                                         | Polyamine oxidase; EC=1.5.3.14; EC=1.5.3.15; Flags: Precursor (At5g13700)                                                                                                                                                                                                             | 6.094                      |
| Cs4g16050                                                       | K14454 aspartate aminotransferase, cytoplasmic [EC:2.6.1.1]   (RefSeq) aspartate aminotransferase, cytoplasmic (A)                    | Aspartate aminotransferase, cytoplasmic; EC=2.6.1.1; Transaminase A (At5g11520)                                                                                                                                                                                                       | -1.328                     |
| Cs2g15280                                                       | K14455 aspartate aminotransferase, mitochondrial [EC:2.6.1.1]   (RefSeq) aspartate aminotransferase, mitochondrial-like (A)           | Aspartate aminotransferase, mitochondrial; EC=2.6.1.1; Transaminase A; Flags: Precursor (At2g30970)                                                                                                                                                                                   | -1.142                     |
|                                                                 |                                                                                                                                       |                                                                                                                                                                                                                                                                                       |                            |
| <b>Index</b>                                                    | <b>Compounds</b>                                                                                                                      |                                                                                                                                                                                                                                                                                       | <b>Log<sub>2</sub>(FC)</b> |
| <b><i>Nitrogen metabolism (ko00910, P = 0.1068)</i></b>         |                                                                                                                                       |                                                                                                                                                                                                                                                                                       |                            |
| pme0014                                                         | L-Glutamic acid                                                                                                                       |                                                                                                                                                                                                                                                                                       | 1.760                      |
| pme0193                                                         | L-Glutamine                                                                                                                           |                                                                                                                                                                                                                                                                                       | -1.949                     |
|                                                                 |                                                                                                                                       |                                                                                                                                                                                                                                                                                       |                            |
| <b><i>Biosynthesis of amino acids (ko01230, P = 0.0101)</i></b> |                                                                                                                                       |                                                                                                                                                                                                                                                                                       |                            |
| pme0075                                                         | N-Acetyl-L-glutamic acid                                                                                                              |                                                                                                                                                                                                                                                                                       | -1.296                     |
| pme0008                                                         | L-Citrulline                                                                                                                          |                                                                                                                                                                                                                                                                                       | -1.032                     |
| mws0671                                                         | L-Homoserine                                                                                                                          |                                                                                                                                                                                                                                                                                       | 5.012                      |
| MWSmce119                                                       | L-Arginine                                                                                                                            |                                                                                                                                                                                                                                                                                       | -2.069                     |
| mws1050                                                         | O-Acetylserine                                                                                                                        |                                                                                                                                                                                                                                                                                       | 1.086                      |
| pme0193                                                         | L-Glutamine                                                                                                                           |                                                                                                                                                                                                                                                                                       | -1.949                     |
| pme2735                                                         | S-Adenosyl-L-methionine                                                                                                               |                                                                                                                                                                                                                                                                                       | -1.048                     |
| mws2125                                                         | Phosphoenolpyruvate                                                                                                                   |                                                                                                                                                                                                                                                                                       | 2.249                      |
| Zmzn000078                                                      | Dihydroxyacetone phosphate                                                                                                            |                                                                                                                                                                                                                                                                                       | 1.339                      |

|                                                                                  |                                 |         |
|----------------------------------------------------------------------------------|---------------------------------|---------|
| pme0014                                                                          | L-Glutamic acid                 | 1.760   |
| mws1346                                                                          | DL-2-Aminoadipic acid           | 3.389   |
| Zmyn000155                                                                       | N- $\alpha$ -Acetyl-L-ornithine | -1.688  |
| Lmbn001609                                                                       | 2-Acetyl-2-hydroxybutanoic acid | -1.142  |
| pme1712                                                                          | L-Saccharopine                  | 1.369   |
| pme0010                                                                          | L-Serine                        | 2.086   |
| mws0254                                                                          | L-Histidine                     | -3.006  |
| pme2527                                                                          | L-Ornithine                     | -2.285  |
| pme0026                                                                          | L-Lysine                        | -1.935  |
| pme0195                                                                          | L-Cysteine                      | -13.209 |
| pme1987                                                                          | L-Alanine                       | -1.018  |
| pme0021                                                                          | L-Phenylalanine                 | -1.064  |
| pme0006                                                                          | L-Proline                       | -1.642  |
| pme2380                                                                          | $\alpha$ -Ketoglutaric acid     | 1.177   |
| <b>Arginine biosynthesis (ko00220, P = 0.0070)</b>                               |                                 |         |
| pme2527                                                                          | L-Ornithine                     | -2.285  |
| pme2380                                                                          | $\alpha$ -Ketoglutaric acid     | 1.177   |
| pme0193                                                                          | L-Glutamine                     | -1.949  |
| pme0014                                                                          | L-Glutamic acid                 | 1.760   |
| Zmyn000155                                                                       | N- $\alpha$ -Acetyl-L-ornithine | -1.688  |
| MWSmce119                                                                        | L-Arginine                      | -2.069  |
| pme0075                                                                          | N-Acetyl-L-glutamic acid        | -1.296  |
| pme0008                                                                          | L-Citrulline                    | -1.032  |
| <b>Phenylalanine, tyrosine and tryptophan biosynthesis (ko00400, P = 0.6907)</b> |                                 |         |
| mws2125                                                                          | Phosphoenolpyruvate             | 2.249   |
| pme0021                                                                          | L-Phenylalanine                 | -1.064  |
| pme3311                                                                          | D-Fructose-1,6-biphosphate      | 1.177   |
| <b>Valine, leucine and isoleucine biosynthesis (ko00290, P = 0.9226)</b>         |                                 |         |
| mws0425                                                                          | Citraconic acid                 | -2.295  |
| Lmbn001609                                                                       | 2-Acetyl-2-Hydroxybutanoic acid | -1.142  |
| <b>Lysine biosynthesis (ko00300, P = 0.0405)</b>                                 |                                 |         |
| pme1712                                                                          | L-Saccharopine                  | 1.369   |

|                                                                         |                                 |  |         |
|-------------------------------------------------------------------------|---------------------------------|--|---------|
| mws1346                                                                 | DL-2-Aminoadipic acid           |  | 3.389   |
| pme0026                                                                 | L-Lysine                        |  | -1.935  |
| mws0671                                                                 | L-Homoserine                    |  | 5.012   |
| pme2380                                                                 | $\alpha$ -Ketoglutaric acid     |  | 1.177   |
|                                                                         |                                 |  |         |
| <i>Valine, leucine and isoleucine degradation (ko00280, P = 0.9096)</i> |                                 |  |         |
| mws0147                                                                 | $\beta$ -Hydroxyisovaleric acid |  | -1.900  |
|                                                                         |                                 |  |         |
| <i>Lysine degradation (ko00310, P = 0.1627)</i>                         |                                 |  |         |
| Lmbn001467                                                              | 5-Acetamidopentanoic acid       |  | 1.154   |
| pme1712                                                                 | L-Saccharopine                  |  | 1.369   |
| pme2380                                                                 | $\alpha$ -Ketoglutaric acid     |  | 1.177   |
| Rfmb319                                                                 | Pipecolic acid                  |  | -1.869  |
| mws1346                                                                 | DL-2-Aminoadipic acid           |  | 3.389   |
| pme0026                                                                 | L-Lysine                        |  | -1.935  |
|                                                                         |                                 |  |         |
| <i>Arginine and proline metabolism (ko00330, P = 0.0642)</i>            |                                 |  |         |
| pme2292                                                                 | Putrescine                      |  | -2.478  |
| pme2527                                                                 | L-Ornithine                     |  | -2.285  |
| pme0006                                                                 | L-Proline                       |  | -1.642  |
| pme2693                                                                 | N-Acetylputrescine              |  | -1.748  |
| MWSmce119                                                               | L-Arginine                      |  | -2.069  |
| pme0295                                                                 | 4-Acetamidobutyric acid         |  | -1.393  |
| ML10197929                                                              | Creatine                        |  | -2.168  |
| pme0014                                                                 | L-Glutamic acid                 |  | 1.760   |
| pme2735                                                                 | S-Adenosyl-L-methionine         |  | -1.048  |
| Lmlp003161                                                              | N-Feruloylputrescine            |  | -15.341 |
| mws0567                                                                 | 4-Guanidinobutyric acid         |  | 5.534   |

**Table S11.** DEGs related to plant organ senescence and cell cycle process in RN0

| Accession No.                                                 | KEGG annotation                                                                                                         | Swissprot annotation (KOG)                                                                                                                                                                                                                                                                                                                                                                                                                                                                                                                                      | Log <sub>2</sub> (FC) |
|---------------------------------------------------------------|-------------------------------------------------------------------------------------------------------------------------|-----------------------------------------------------------------------------------------------------------------------------------------------------------------------------------------------------------------------------------------------------------------------------------------------------------------------------------------------------------------------------------------------------------------------------------------------------------------------------------------------------------------------------------------------------------------|-----------------------|
| <b><i>Plant organ senescence (GO:0090693, P = 0.3212)</i></b> |                                                                                                                         |                                                                                                                                                                                                                                                                                                                                                                                                                                                                                                                                                                 |                       |
| Cs2g15700                                                     | K16292 KDEL-tailed cysteine endopeptidase [EC:3.4.22.-]   (RefSeq) senescence-specific cysteine protease SAG39-like (A) | Senescence-specific cysteine protease SAG39 {ECO:0000305}; EC=3.4.22.- {ECO:0000305}; Cysteine proteinase SAG39 {ECO:0000305}; Protein SENESCENCE-ASSOCIATED GENE 39 {ECO:0000303 PubMed:20439547}; Flags: Precursor (At5g45890)                                                                                                                                                                                                                                                                                                                                | 10.416                |
| Cs5g28720                                                     | K24028 salicylic acid 3-hydroxylase [EC:1.14.11.-]   (RefSeq) protein DMR6-LIKE OXYGENASE 2-like (A)                    | Protein DMR6-LIKE OXYGENASE 1 {ECO:0000303 PubMed:25376907}; EC=1.14.11.- {ECO:0000255 PROSITE-ProRule:PRU00805}; 2-oxoglutarate (2OG)-Fe(II) oxygenase-like protein DLO1 {ECO:0000303 PubMed:25376907}; rotein SENESCENCE-ASSOCIATED GENE 108 {ECO:0000303 PubMed:23959884}; Salicylate 3-hydroxylase DLO1 {ECO:0000303 PubMed:23959884}; S3H DLO1 {ECO:0000303 PubMed:23959884}; SA 3-hydroxylase DLO1 {ECO:0000303 PubMed:23959884}; Salicylic acid 3-hydroxylase DLO1 {ECO:0000303 PubMed:23959884}; EC=1.14.13.- {ECO:0000269 PubMed:23959884} (At3g19000) | 4.401                 |
| Cs8g16870                                                     | --                                                                                                                      | NAC transcription factor 29; AtNAC029; Protein NAC-LIKE, ACTIVATED BY AP3/PI; AtNAP (At1g69490)                                                                                                                                                                                                                                                                                                                                                                                                                                                                 | 9.528                 |
| Cs2g15480                                                     | K16292 KDEL-tailed cysteine endopeptidase [EC:3.4.22.-]   (RefSeq) senescence-specific cysteine protease SAG39-like (A) | Senescence-specific cysteine protease SAG39 {ECO:0000305}; EC=3.4.22.- {ECO:0000305}; Cysteine proteinase SAG39 {ECO:0000305}; Protein SENESCENCE-ASSOCIATED GENE 39 {ECO:0000250 UniProtKB:Q7XWK5}; Flags: Precursor (At5g45890)                                                                                                                                                                                                                                                                                                                               | 13.717                |
| Cs6g06780                                                     | K24028 salicylic acid 3-hydroxylase [EC:1.14.11.-]   (RefSeq) protein DMR6-LIKE OXYGENASE 2-like (A)                    | Protein SRG1; AtSRG1; Protein SENESCENCE-RELATED GENE 1 (At3g21420)                                                                                                                                                                                                                                                                                                                                                                                                                                                                                             | 4.595                 |
| Cs7g31460                                                     | K24028 salicylic acid 3-hydroxylase [EC:1.14.11.-]   (RefSeq) protein DMR6-LIKE OXYGENASE 2-like (A)                    | Protein SRG1; AtSRG1; Protein SENESCENCE-RELATED GENE 1 (At3g21420)                                                                                                                                                                                                                                                                                                                                                                                                                                                                                             | 12.456                |
| Cs7g12240                                                     | K24028 salicylic acid 3-hydroxylase [EC:1.14.11.-]   (RefSeq) protein DOWNY MILDEW RESISTANCE 6 (A)                     | Protein SRG1; AtSRG1; Protein SENESCENCE-RELATED GENE 1 (At1g17020)                                                                                                                                                                                                                                                                                                                                                                                                                                                                                             | 10.907                |
| Cs2g04940                                                     | K16292 KDEL-tailed cysteine endopeptidase [EC:3.4.22.-]   (RefSeq) senescence-specific cysteine protease SAG39-like (A) | Senescence-specific cysteine protease SAG39 {ECO:0000305}; EC=3.4.22.- {ECO:0000305}; Cysteine proteinase SAG39 {ECO:0000305}; Protein SENESCENCE-ASSOCIATED GENE 39 {ECO:0000250 UniProtKB:Q7XWK5}; Flags: Precursor (At5g45890)                                                                                                                                                                                                                                                                                                                               | 11.812                |
| Cs5g28710                                                     | K24028 salicylic acid 3-hydroxylase [EC:1.14.11.-]   (RefSeq) protein DMR6-LIKE OXYGENASE 2-like (A)                    | Protein DMR6-LIKE OXYGENASE 1 {ECO:0000303 PubMed:25376907}; EC=1.14.11.- {ECO:0000255 PROSITE-ProRule:PRU00805}; 2-oxoglutarate (2OG)-Fe(II) oxygenase-like protein DLO1 {ECO:0000303 PubMed:25376907};                                                                                                                                                                                                                                                                                                                                                        | -2.993                |

|           |                                                                                                                               |                                                                                                                                                                                                                                                                                                                                                                                                                                                                                                                                                                                             |        |
|-----------|-------------------------------------------------------------------------------------------------------------------------------|---------------------------------------------------------------------------------------------------------------------------------------------------------------------------------------------------------------------------------------------------------------------------------------------------------------------------------------------------------------------------------------------------------------------------------------------------------------------------------------------------------------------------------------------------------------------------------------------|--------|
|           |                                                                                                                               | Protein SENESCENCE-ASSOCIATED GENE 108<br>{ECO:0000303 PubMed:23959884}; Salicylate 3-hydroxylase DLO1<br>{ECO:0000303 PubMed:23959884}; S3H DLO1<br>{ECO:0000303 PubMed:23959884}; SA 3-hydroxylase DLO1<br>{ECO:0000303 PubMed:23959884}; Salicylic acid 3-hydroxylase DLO1<br>{ECO:0000303 PubMed:23959884}; EC=1.14.13.-<br>{ECO:0000269 PubMed:23959884} (At3g19000)                                                                                                                                                                                                                   |        |
| Cs2g15490 | K16292 KDEL-tailed cysteine endopeptidase [EC:3.4.22.-]   (RefSeq)<br>senescence-specific cysteine protease SAG39-like (A)    | Senescence-specific cysteine protease SAG39 {ECO:0000305}; EC=3.4.22.-<br>{ECO:0000305}; Cysteine proteinase SAG39 {ECO:0000305}; Protein<br>SENESCENCE-ASSOCIATED GENE 39<br>{ECO:0000250 UniProtKB:Q7XWK5}; Flags: Precursor (At5g45890)                                                                                                                                                                                                                                                                                                                                                  | 11.620 |
| Cs5g13150 | K24028 salicylic acid 3-hydroxylase [EC:1.14.11.-]   (RefSeq) protein<br>DOWNY MILDEW RESISTANCE 6 (A)                        | Protein SRG1; AtSRG1; Protein SENESCENCE-RELATED GENE 1<br>(At1g17020)                                                                                                                                                                                                                                                                                                                                                                                                                                                                                                                      | -3.070 |
| Cs5g09290 | K14488 SAUR family protein   (RefSeq) auxin-responsive protein SAUR15<br>(A)                                                  | Auxin-responsive protein SAUR36 {ECO:0000305}; Protein RESPONSE TO<br>AUXINS AND GIBBERELLINS 1 {ECO:0000303 PubMed:23503980}; Protein<br>SENESCENCE-ASSOCIATED GENE 201 {ECO:0000305}; Protein SMALL<br>AUXIN UP RNA 36 {ECO:0000303 PubMed:12036261} (At4g22620)                                                                                                                                                                                                                                                                                                                          | -3.093 |
| Cs7g07830 | --                                                                                                                            | Transcription factor KUA1 {ECO:0000303 PubMed:24806884}; Myb-related<br>protein H {ECO:0000303 PubMed:23888064}; Short=AtMYBH<br>{ECO:0000303 PubMed:23888064}; AtMYBS3<br>{ECO:0000303 PubMed:25920996}; MYBS3-homolg protein<br>{ECO:0000303 PubMed:25920996}; Protein KUODA1<br>{ECO:0000303 PubMed:24806884} (At1g70000)                                                                                                                                                                                                                                                                | 2.261  |
| Cs5g28750 | K24028 salicylic acid 3-hydroxylase [EC:1.14.11.-]   (RefSeq) protein<br>DOWNY MILDEW RESISTANCE 6 (A)                        | Protein DMR6-LIKE OXYGENASE 1 {ECO:0000303 PubMed:25376907};<br>EC=1.14.11.- {ECO:0000255 PROSITE-ProRule:PRU00805}; 2-oxoglutarate<br>(2OG)-Fe(II) oxygenase-like protein DLO1 {ECO:0000303 PubMed:25376907};<br>Protein SENESCENCE-ASSOCIATED GENE 108<br>{ECO:0000303 PubMed:23959884}; Salicylate 3-hydroxylase DLO1<br>{ECO:0000303 PubMed:23959884}; S3H DLO1<br>{ECO:0000303 PubMed:23959884}; SA 3-hydroxylase DLO1<br>{ECO:0000303 PubMed:23959884}; Salicylic acid 3-hydroxylase DLO1<br>{ECO:0000303 PubMed:23959884}; EC=1.14.13.-<br>{ECO:0000269 PubMed:23959884} (At3g19000) | 4.442  |
| Cs9g16650 | K13691 pathogen-inducible salicylic acid glucosyltransferase [EC:2.4.1.-]  <br>(RefSeq) UDP-glycosyltransferase 74F2-like (A) | UDP-glycosyltransferase 76B1 {ECO:0000305}; EC=2.4.1.- {ECO:0000305}<br>(At3g11340)                                                                                                                                                                                                                                                                                                                                                                                                                                                                                                         | 2.392  |
| Cs7g03310 | --                                                                                                                            | Protein ENHANCED DISEASE RESISTANCE 2 (At1g13970)                                                                                                                                                                                                                                                                                                                                                                                                                                                                                                                                           | -3.161 |

|                     |                                                                                                                                                             |                                                                                                                                                                                                                                   |        |
|---------------------|-------------------------------------------------------------------------------------------------------------------------------------------------------------|-----------------------------------------------------------------------------------------------------------------------------------------------------------------------------------------------------------------------------------|--------|
| Cs7g22760           | K14638 solute carrier family 15 (peptide/histidine transporter), member 3/4   (RefSeq) protein NRT1/ PTR FAMILY 7.3 (A)                                     | Protein NRT1/ PTR FAMILY 7.3; AtNPF7.3; Nitrate transporter 1.5 (At1g32450)                                                                                                                                                       | 3.554  |
| Cs8g18310           | K11820 N-hydroxythioamide S-beta-glucosyltransferase [EC:2.4.1.195]   (RefSeq) UDP-glycosyltransferase 74B1 (A)                                             | UDP-glycosyltransferase 76B1 {ECO:0000305}; EC=2.4.1.- {ECO:0000305} (At3g11340)                                                                                                                                                  | -2.704 |
| Cs4g06020           | K22048 mechanosensitive ion channel protein 4/5/6/7/8/9/10   (RefSeq) mechanosensitive ion channel protein 10-like (A)                                      | Mechanosensitive ion channel protein 10; Mechanosensitive channel of small conductance-like 10; MscS-Like protein 10; AtMSL10 (At5g12080)                                                                                         | -4.167 |
| Cs2g30000           | K19045 E3 ubiquitin-protein ligase BIG BROTHER and related proteins [EC:2.3.2.27]   (RefSeq) E3 ubiquitin ligase BIG BROTHER (A)                            | E3 ubiquitin ligase BIG BROTHER; EC=2.3.2.27 {ECO:0000269 PubMed:16461280, ECO:0000269 PubMed:18483219}; Protein ENHANCER OF DA1-1; RING-type E3 ubiquitin transferase BIG BROTHER {ECO:0000305} (At3g19910)                      | -1.097 |
| orange1.1t0570<br>6 | K16292 KDEL-tailed cysteine endopeptidase [EC:3.4.22.-]   (RefSeq) senescence-specific cysteine protease SAG39-like (A)                                     | Senescence-specific cysteine protease SAG39 {ECO:0000305}; EC=3.4.22.- {ECO:0000305}; Cysteine proteinase SAG39 {ECO:0000305}; Protein SENESCENCE-ASSOCIATED GENE 39 {ECO:0000250 UniProtKB:Q7XWK5}; Flags: Precursor (At5g45890) | 7.524  |
| orange1.1t0250<br>2 | K01240 uridine nucleosidase [EC:3.2.2.3]   (RefSeq) probable uridine nucleosidase 2 (A)                                                                     | Probable uridine nucleosidase 2; EC=3.2.2.3; Uridine ribohydrolase 2 (At1g05620)                                                                                                                                                  | -1.646 |
| Cs4g05610           | K05278 flavonol synthase [EC:1.14.11.23]   (RefSeq) flavonol synthase/flavanone 3-hydroxylase-like (A)                                                      | Protein SRG1; AtSRG1; Protein SENESCENCE-RELATED GENE 1 (At5g20400)                                                                                                                                                               | 1.368  |
| Cs1g03700           | K22048 mechanosensitive ion channel protein 4/5/6/7/8/9/10   (RefSeq) mechanosensitive ion channel protein 10-like (A)                                      | Mechanosensitive ion channel protein 10; Mechanosensitive channel of small conductance-like 10; MscS-Like protein 10; AtMSL10 (At5g12080)                                                                                         | -1.885 |
| Cs7g32220           | K08236 limonoid glucosyltransferase [EC:2.4.1.210]   (RefSeq) SLLGT; limonoid UDP-glucosyltransferase (A)                                                   | UDP-glycosyltransferase 76B1 {ECO:0000305}; EC=2.4.1.- {ECO:0000305} (At3g11340)                                                                                                                                                  | 1.260  |
| Cs2g04090           | K24028 salicylic acid 3-hydroxylase [EC:1.14.11.-]   (RefSeq) protein DMR6-LIKE OXYGENASE 2-like (A)                                                        | Protein SRG1; AtSRG1; Protein SENESCENCE-RELATED GENE 1 (At1g17020)                                                                                                                                                               | -1.542 |
| Cs8g18300           | K11820 N-hydroxythioamide S-beta-glucosyltransferase [EC:2.4.1.195]   (RefSeq) UDP-glycosyltransferase 74B1 (A)                                             | UDP-glycosyltransferase 76B1 {ECO:0000305}; EC=2.4.1.- {ECO:0000305} (At3g11340)                                                                                                                                                  | 1.090  |
| Cs7g29570           | K13425 WRKY transcription factor 22   (RefSeq) WRKY transcription factor 22 (A)                                                                             | Probable WRKY transcription factor 70; WRKY DNA-binding protein 70 (At3g56400)                                                                                                                                                    | -1.131 |
| orange1.1t0358<br>3 | K24028 salicylic acid 3-hydroxylase [EC:1.14.11.-]   (RefSeq) protein DOWNY MILDEW RESISTANCE 6 (A)                                                         | Protein SRG1; AtSRG1; Protein SENESCENCE-RELATED GENE 1 (At1g17020)                                                                                                                                                               | 1.483  |
| Cs9g16575           | K09264 MADS-box transcription factor, plant   (RefSeq) agamous-like MADS-box protein AGL11 (A)                                                              | MADS-box protein AGL42; Protein AGAMOUS-LIKE 42; Protein FOREVER YOUNG FLOWER {ECO:0000303 PubMed:21689171} (At2g45660)                                                                                                           | -5.049 |
| Cs1g03960           | K05278 flavonol synthase [EC:1.14.11.23]   (RefSeq) flavonol synthase/flavanone 3-hydroxylase-like (A)                                                      | Protein SRG1; AtSRG1; Protein SENESCENCE-RELATED GENE 1 (At1g49390)                                                                                                                                                               | -1.598 |
| Cs1g18890           | K08202 MFS transporter, OCT family, solute carrier family 22 (organic cation transporter), member 4/5   (RefSeq) organic cation/carnitine transporter 4 (A) | Organic cation/carnitine transporter 1; AtOCT1 (At1g73220)                                                                                                                                                                        | 2.157  |

|                                                    |                                                                                                                          |                                                                                                                                                                                                                                                                                                                                                                                                                                                                                                                                                                 |        |
|----------------------------------------------------|--------------------------------------------------------------------------------------------------------------------------|-----------------------------------------------------------------------------------------------------------------------------------------------------------------------------------------------------------------------------------------------------------------------------------------------------------------------------------------------------------------------------------------------------------------------------------------------------------------------------------------------------------------------------------------------------------------|--------|
| Cs1g12310                                          | K24028 salicylic acid 3-hydroxylase [EC:1.14.11.-]   (RefSeq) protein DMR6-LIKE OXYGENASE 2-like (A)                     | Protein DMR6-LIKE OXYGENASE 1 {ECO:0000303 PubMed:25376907}; EC=1.14.11.- {ECO:0000255 PROSITE-ProRule:PRU00805}; 2-oxoglutarate (2OG)-Fe(II) oxygenase-like protein DLO1 {ECO:0000303 PubMed:25376907}; Protein SENESENCE-ASSOCIATED GENE 108 {ECO:0000303 PubMed:23959884}; Salicylate 3-hydroxylase DLO1 {ECO:0000303 PubMed:23959884}; S3H DLO1 {ECO:0000303 PubMed:23959884}; SA 3-hydroxylase DLO1 {ECO:0000303 PubMed:23959884}; Salicylic acid 3-hydroxylase DLO1 {ECO:0000303 PubMed:23959884}; EC=1.14.13.- {ECO:0000269 PubMed:23959884} (At4g10500) | -1.942 |
| <b>Cell cycle process (GO:0022402, P = 0.8439)</b> |                                                                                                                          |                                                                                                                                                                                                                                                                                                                                                                                                                                                                                                                                                                 |        |
| orange1.1t04027                                    | K10999 cellulose synthase A [EC:2.4.1.12]   (RefSeq) probable cellulose synthase A catalytic subunit 3 [UDP-forming] (A) | Probable cellulose synthase A catalytic subunit 5 [UDP-forming]; EC=2.4.1.12; OsCesA5 (At4g39350)                                                                                                                                                                                                                                                                                                                                                                                                                                                               | 5.650  |
| Cs1g03980                                          | K10999 cellulose synthase A [EC:2.4.1.12]   (RefSeq) cellulose synthase A catalytic subunit 7 [UDP-forming] (A)          | Cellulose synthase-like protein B4; AtCslB4; EC=2.4.1.- (At2g32540)                                                                                                                                                                                                                                                                                                                                                                                                                                                                                             | 2.987  |
| Cs4g08470                                          | K10999 cellulose synthase A [EC:2.4.1.12]   (RefSeq) cellulose synthase A catalytic subunit 7 [UDP-forming]-like (A)     | Cellulose synthase-like protein E6; EC=2.4.1.-; OsCslE6 (At1g55850)                                                                                                                                                                                                                                                                                                                                                                                                                                                                                             | 2.946  |
| Cs7g08760                                          | --                                                                                                                       | Type 2 DNA topoisomerase 6 subunit B-like {ECO:0000305}; Meiotic topoisomerase VIB-like {ECO:0000303 PubMed:26917763}; AtMTOPVIB {ECO:0000303 PubMed:26917764} (At1g60460)                                                                                                                                                                                                                                                                                                                                                                                      | 2.250  |
| Cs6g14430                                          | K11593 eukaryotic translation initiation factor 2C   (RefSeq) protein argonaute MEL1-like (A)                            | Protein argonaute MEL1; Protein MEIOSIS ARRESTED AT LEPTOTENE 1; OsMEL1 (At2g27880)                                                                                                                                                                                                                                                                                                                                                                                                                                                                             | 2.539  |
| Cs9g08730                                          | K10999 cellulose synthase A [EC:2.4.1.12]   (RefSeq) cellulose synthase A catalytic subunit 7 [UDP-forming] (A)          | Cellulose synthase-like protein G2; AtCslG2; EC=2.4.1.- (At4g24000)                                                                                                                                                                                                                                                                                                                                                                                                                                                                                             | 2.580  |
| Cs5g01970                                          | K10999 cellulose synthase A [EC:2.4.1.12]   (RefSeq) cellulose synthase A catalytic subunit 7 [UDP-forming] (A)          | Cellulose synthase-like protein G3; AtCslG3; EC=2.4.1.- (At4g23990)                                                                                                                                                                                                                                                                                                                                                                                                                                                                                             | 2.597  |
| Cs8g05170                                          | K14505 cyclin D3, plant   (RefSeq) cyclin-D3-1 (A)                                                                       | Cyclin-D3-1; Cyclin-delta-3; Cyclin-d3; G1/S-specific cyclin-D3-1; CycD3;1 (At4g34160)                                                                                                                                                                                                                                                                                                                                                                                                                                                                          | 1.386  |
| orange1.1t05968                                    | K16586 HAUS augmin-like complex subunit 3   (RefSeq) AUGMIN subunit 3-like (A)                                           | AUGMIN subunit 3 {ECO:0000303 PubMed:22505726} (At5g48520)                                                                                                                                                                                                                                                                                                                                                                                                                                                                                                      | 1.918  |
| Cs3g21530                                          | K10999 cellulose synthase A [EC:2.4.1.12]   (RefSeq) cellulose synthase A catalytic subunit 2 [UDP-forming]-like (A)     | Cellulose synthase A catalytic subunit 6 [UDP-forming]; AtCesA6; EC=2.4.1.12; AraxCelA; Isoxaben-resistant protein 2; Protein PROCUSTE 1; Protein QUILL (At5g64740)                                                                                                                                                                                                                                                                                                                                                                                             | -2.390 |
| Cs5g01960                                          | K10999 cellulose synthase A [EC:2.4.1.12]   (RefSeq) cellulose synthase A catalytic subunit 7 [UDP-forming]-like (A)     | Cellulose synthase-like protein G3; AtCslG3; EC=2.4.1.- (At4g23990)                                                                                                                                                                                                                                                                                                                                                                                                                                                                                             | 2.555  |

|                 |                                                                                                                                                |                                                                                                                                                                                                                       |        |
|-----------------|------------------------------------------------------------------------------------------------------------------------------------------------|-----------------------------------------------------------------------------------------------------------------------------------------------------------------------------------------------------------------------|--------|
| Cs1g13150       | K11864 BRCA1/BRCA2-containing complex subunit 3 [EC:3.4.19.-]   (RefSeq) lys-63-specific deubiquitinase BRCC36 (A)                             | COP9 signalosome complex subunit 5b; Signalosome subunit 5b; EC=3.4.-.-; Jun activation domain-binding homolog 2 (At3g06820)                                                                                          | 1.033  |
| Cs2g13060       | K13415 protein brassinosteroid insensitive 1 [EC:2.7.10.1 2.7.11.1]   (RefSeq) protein BRASSINOSTEROID INSENSITIVE 1 (A)                       | Receptor protein kinase-like protein ZAR1 {ECO:0000303 PubMed:27014878}; EC=2.7.11.1 {ECO:0000305}; Protein ZYGOTIC ARREST 1 {ECO:0000303 PubMed:27014878}; Flags: Precursor (At2g01210)                              | -1.544 |
| Cs4g12870       | K04368 mitogen-activated protein kinase kinase 1 [EC:2.7.12.2]   (RefSeq) mitogen-activated protein kinase kinase 6 (A)                        | Mitogen-activated protein kinase kinase 6; AtMKK6; MAP kinase kinase 6; EC=2.7.12.2; Protein Arabidopsis NQK1 homolog (At5g56580)                                                                                     | -2.169 |
| orange1.1t01580 | K16586 HAUS augmin-like complex subunit 3   (RefSeq) AUGMIN subunit 3-like (A)                                                                 | AUGMIN subunit 3 {ECO:0000303 PubMed:22505726} (At5g48520)                                                                                                                                                            | 1.548  |
| Cs4g09670       | K16732 protein regulator of cytokinesis 1   (RefSeq) 65-kDa microtubule-associated protein 1 (A)                                               | 65-kDa microtubule-associated protein 1; AtMAP65-1 (At5g55230)                                                                                                                                                        | -1.489 |
| Cs3g22730       | K13418 somatic embryogenesis receptor kinase 1 [EC:2.7.10.1 2.7.11.1]   (RefSeq) SERK, CitSERK; somatic embryogenesis receptor-like kinase (A) | Somatic embryogenesis receptor kinase 2; AtSERK2; EC=2.7.11.1; Somatic embryogenesis receptor-like kinase 2; Flags: Precursor (At1g34210)                                                                             | -1.625 |
| Cs2g19520       | --                                                                                                                                             | Transcriptional regulator STERILE APETALA (At5g35770)                                                                                                                                                                 | -2.174 |
| Cs3g13790       | K20606 mitogen-activated protein kinase kinase kinase ANP1 [EC:2.7.11.25]   (RefSeq) mitogen-activated protein kinase kinase kinase NPK1 (A)   | Mitogen-activated protein kinase kinase kinase NPK1; EC=2.7.11.25; Nicotiana protein kinase 1 (At1g09000)                                                                                                             | -1.359 |
| Cs7g04130       | K09422 transcription factor MYB, plant   (RefSeq) myb-related protein A (A)                                                                    | Transcription factor MYB124 {ECO:0000303 PubMed:11597504}; Myb-related protein 124 {ECO:0000303 PubMed:11597504}; AtMYB124 {ECO:0000303 PubMed:11597504}; Protein FOUR LIPS {ECO:0000303 PubMed:11536724} (At1g14350) | -1.235 |
| Cs1g21720       | K18811 cyclin D5, plant   (RefSeq) cyclin-D5-1 (A)                                                                                             | Cyclin-D5-1; G1/S-specific cyclin-D5-1; CycD5;1 (At1g70210)                                                                                                                                                           | -1.251 |
| novel.1503      | K07904 Ras-related protein Rab-11A   (RefSeq) ras-related protein RABA2a (A)                                                                   | Ras-related protein RABA2a; AtRABA2a; Ras-related protein Rab11C; AtRab11C; Flags: Precursor (At1g09630)                                                                                                              | 1.044  |
| Cs1g20970       | K10401 kinesin family member 18/19   (RefSeq) kinesin-like protein KIF19 (A)                                                                   | Kinesin-like protein KIN-8B {ECO:0000305} (At3g49650)                                                                                                                                                                 | -1.728 |
| Cs8g20260       | K05857 phosphatidylinositol phospholipase C, delta [EC:3.1.4.11]   (RefSeq) phosphoinositide phospholipase C 2-like (A)                        | Phosphoinositide phospholipase C 2; EC=3.1.4.11; Phosphoinositide phospholipase PLC2; AtPLC2; PI-PLC2 (At3g08510)                                                                                                     | -2.099 |
| Cs7g02720       | --                                                                                                                                             | Coiled-coil domain-containing protein SCD2 {ECO:0000305}; Protein STOMATAL CYTOKINESIS DEFECTIVE 2 {ECO:0000303 PubMed:24179130} (At3g48860)                                                                          | -1.050 |
| Cs2g25230       | K13254 spastin [EC:3.6.4.3]   (RefSeq) spastin (A)                                                                                             | ATPase family AAA domain-containing protein FIGL1 {ECO:0000305}; AAA-ATPase FIDGETIN-LIKE 1 {ECO:0000303 PubMed:26161528}; EC=3.6.4.- {ECO:0000305} (At3g27120)                                                       | -1.266 |
| Cs7g10700       | K12778 meiosis-specific protein   (RefSeq) meiosis-specific protein ASY1 isoform X2 (A)                                                        | Meiosis-specific protein ASY1 {ECO:0000305}; Protein ASYNAPTIC 1 {ECO:0000303 PubMed:10855496}; AtASY1 {ECO:0000303 PubMed:22319460} (At1g67370)                                                                      | -1.342 |

|                 |                                                                                                                       |                                                                                                                                                         |        |
|-----------------|-----------------------------------------------------------------------------------------------------------------------|---------------------------------------------------------------------------------------------------------------------------------------------------------|--------|
| Cs7g19690       | K11511 centromere protein S   (RefSeq) MHF histone-fold complex subunit 1 (A)                                         | Protein MHF1 homolog {ECO:0000303 PubMed:24635147}; AtMHF1 {ECO:0000303 PubMed:24635147} (At5g50930)                                                    | -1.347 |
| Cs5g30360       | --                                                                                                                    | F-box/LRR-repeat protein 17; F-box-like protein 17 (At3g54650)                                                                                          | -1.562 |
| Cs8g05740       | --                                                                                                                    | Cyclin-dependent kinase inhibitor 7; Inhibitor/interactor of CDK protein 5; KIP-related protein 7 (At1g49620)                                           | -1.194 |
| Cs7g16670       | --                                                                                                                    | Protein TORNADO 2; Protein EKEKO; TETRASPANIN-1 (At5g46700)                                                                                             | -1.721 |
| Cs5g04850       | K09391 transcription factor E2F7/8   (RefSeq) E2F transcription factor-like E2FE (A)                                  | E2F transcription factor-like E2FE; DP-E2F-like protein 1; E2F-like repressor E2L3 (At3g48160)                                                          | -1.481 |
| Cs5g29280       | --                                                                                                                    | Protein JASON {ECO:0000305} (At1g04030)                                                                                                                 | -1.525 |
| orange1.1t02057 | K00558 DNA (cytosine-5)-methyltransferase 1 [EC:2.1.1.37]   (RefSeq) DNA (cytosine-5)-methyltransferase CMT3-like (A) | DNA (cytosine-5)-methyltransferase CMT3; EC=2.1.1.37; Chromomethylase 3; Protein CHROMOMETHYLASE 3 (At1g69770)                                          | -1.056 |
| Cs3g16980       | K06228 fused [EC:2.7.11.1]   (RefSeq) serine/threonine-protein kinase TIO (A)                                         | Serine/threonine-protein kinase TIO; EC=2.7.11.1; Fused homolog; AtFUSED; Protein TWO-IN-ONE; AtTIO (At1g50240)                                         | -1.510 |
| Cs4g06840       | K11498 centromeric protein E   (RefSeq) kinesin-like protein NACK2 (A)                                                | Kinesin-like protein NACK2; NPK1-activating kinesin 2 (At3g43210)                                                                                       | -1.250 |
| Cs6g10590       | K07760 cyclin-dependent kinase [EC:2.7.11.22]   (RefSeq) cyclin-dependent kinase B1-2 (A)                             | Cyclin-dependent kinase B1-1; CDKB1;1; EC=2.7.11.22; EC=2.7.11.23; Cell division control protein 2 homolog B (At3g54180)                                | -1.039 |
| Cs1g07450       | K17065 dynamin 1-like protein [EC:3.6.5.5]   (RefSeq) dynamin-related protein 3A-like (A)                             | Dynamin-related protein 5A; Protein ARC5-like (At1g53140)                                                                                               | -1.457 |
| Cs2g20980       | K06676 condensin complex subunit 2   (RefSeq) condensin complex subunit 2 (A)                                         | Condensin complex subunit 2; Chromosome-associated protein H; AtCAP-H; Non-SMC condensin I complex subunit H; Protein EMBRYO DEFECTIVE 2795 (At2g32590) | -1.213 |
| Cs2g21100       | K10999 cellulose synthase A [EC:2.4.1.12]   (RefSeq) cellulose synthase A catalytic subunit 7 [UDP-forming]-like (A)  | Cellulose synthase-like protein B4; AtCslB4; EC=2.4.1.- (At2g32540)                                                                                     | 1.073  |
| Cs1g05390       | --                                                                                                                    | Protein TONSOKU; Protein BRUSHY 1; Protein MGOUN 3 (At3g18730_1)                                                                                        | -1.197 |
| novel.1500      | K07904 Ras-related protein Rab-11A   (RefSeq) ras-related protein RABA2a (A)                                          | Ras-related protein RABA2a; AtRABA2a; Ras-related protein Rab11C; AtRab11C; Flags: Precursor (At1g09630)                                                | 1.529  |
| Cs2g11560       | --                                                                                                                    | Polygalacturonase QRT3; AtQRT3; PG QRT3; EC=3.2.1.15; Pectinase QRT3; Protein QUARTET 3; Flags: Precursor (At4g20040)                                   | -1.851 |
| Cs3g27820       | K07760 cyclin-dependent kinase [EC:2.7.11.22]   (RefSeq) cyclin-dependent kinase B2-2 (A)                             | Cyclin-dependent kinase B2-2; CDKB2;2; EC=2.7.11.22; EC=2.7.11.23 (At1g20930)                                                                           | -1.138 |

**Table S12.** DEGs and DAMs related to carbon, carbohydrate, and energy metabolisms in RN0

| Accession No.                                  | KEGG annotation                                                                                                                                                      | Swissprot annotation (KOG)                                                                                                   | Log <sub>2</sub> (FC) |
|------------------------------------------------|----------------------------------------------------------------------------------------------------------------------------------------------------------------------|------------------------------------------------------------------------------------------------------------------------------|-----------------------|
| <b>Carbon metabolism (ko01200, P = 0.0123)</b> |                                                                                                                                                                      |                                                                                                                              |                       |
| Cs1g03610                                      | K00025 malate dehydrogenase [EC:1.1.1.37]   (RefSeq) malate dehydrogenase, cytoplasmic-like (A)                                                                      | Malate dehydrogenase, cytoplasmic {ECO:0000303 Ref.1}; EC=1.1.1.37 {ECO:0000269 PubMed:23313174} (At1g04410)                 | 1.196                 |
| Cs4g15270                                      | K00029 malate dehydrogenase (oxaloacetate-decarboxylating)(NADP+) [EC:1.1.1.40]   (RefSeq) NADP-dependent malic enzyme (A)                                           | NADP-dependent malic enzyme; NADP-ME; EC=1.1.1.40 (At2g19900)                                                                | -1.155                |
| Cs4g19200                                      | K00029 malate dehydrogenase (oxaloacetate-decarboxylating)(NADP+) [EC:1.1.1.40]   (RefSeq) NADP-dependent malic enzyme (A)                                           | NADP-dependent malic enzyme; NADP-ME; EC=1.1.1.40 (At5g25880)                                                                | -1.197                |
| novel.1025                                     | K00036 glucose-6-phosphate 1-dehydrogenase [EC:1.1.1.49 1.1.1.363]   (RefSeq) glucose-6-phosphate 1-dehydrogenase 4, chloroplastic-like (A)                          | Glucose-6-phosphate 1-dehydrogenase 4, chloroplastic; G6PD4; G6PDH4; EC=1.1.1.49; Flags: Precursor (At1g09420)               | -1.056                |
| Cs3g23090                                      | K00058 D-3-phosphoglycerate dehydrogenase / 2-oxoglutarate reductase [EC:1.1.1.95 1.1.1.399]   (RefSeq) D-3-phosphoglycerate dehydrogenase 3, chloroplastic-like (A) | D-3-phosphoglycerate dehydrogenase 3, chloroplastic; EC=1.1.1.95 {ECO:0000269 PubMed:24368794}; Flags: Precursor (At3g19480) | 1.418                 |
| Cs3g17970                                      | K00121 S-(hydroxymethyl) glutathione dehydrogenase / alcohol dehydrogenase [EC:1.1.1.284 1.1.1.1]   (RefSeq) alcohol dehydrogenase-like 2 (A)                        | Alcohol dehydrogenase-like 2; EC=1.1.1.1 {ECO:0000250 UniProtKB:P06525} (At1g22440)                                          | -1.741                |
| Cs7g14420                                      | K00121 S-(hydroxymethyl) glutathione dehydrogenase / alcohol dehydrogenase [EC:1.1.1.284 1.1.1.1]   (RefSeq) alcohol dehydrogenase-like 2 (A)                        | Alcohol dehydrogenase-like 2; EC=1.1.1.1 {ECO:0000250 UniProtKB:P06525} (At1g22440)                                          | 1.064                 |
| orange1.1t05469                                | K00121 S-(hydroxymethyl) glutathione dehydrogenase / alcohol dehydrogenase [EC:1.1.1.284 1.1.1.1]   (RefSeq) alcohol dehydrogenase-like 2 (A)                        | Alcohol dehydrogenase-like 2; EC=1.1.1.1 {ECO:0000250 UniProtKB:P06525} (At1g22440)                                          | -1.458                |
| novel.2520                                     | K00121 S-(hydroxymethyl) glutathione dehydrogenase / alcohol dehydrogenase [EC:1.1.1.284 1.1.1.1]   (RefSeq) alcohol dehydrogenase-like 2 (A)                        | (At5g16660)                                                                                                                  | 1.174                 |
| novel.818                                      | K00134 glyceraldehyde 3-phosphate dehydrogenase [EC:1.2.1.12]   (RefSeq) glyceraldehyde-3-phosphate dehydrogenase GAPC1, cytosolic (A)                               | Glyceraldehyde-3-phosphate dehydrogenase, cytosolic; EC=1.2.1.12; Flags: Fragment (At1g13440)                                | -1.068                |
| Cs5g01270                                      | K00161 pyruvate dehydrogenase E1 component alpha subunit [EC:1.2.4.1]   (RefSeq) pyruvate dehydrogenase E1 component subunit alpha-3, chloroplastic (A)              | Pyruvate dehydrogenase E1 component subunit alpha-3, chloroplastic; EC=1.2.4.1; Flags: Precursor (At1g01090)                 | 1.356                 |
| orange1.1t05835                                | K00161 pyruvate dehydrogenase E1 component alpha subunit [EC:1.2.4.1]   (RefSeq) pyruvate dehydrogenase E1 component subunit alpha-3, chloroplastic (A)              | Pyruvate dehydrogenase E1 component subunit alpha-3, chloroplastic; EC=1.2.4.1; Flags: Precursor (At1g01090)                 | 2.430                 |

|           |                                                                                                                                                                                                              |                                                                                                                                                                                                                                                                                                                                 |        |
|-----------|--------------------------------------------------------------------------------------------------------------------------------------------------------------------------------------------------------------|---------------------------------------------------------------------------------------------------------------------------------------------------------------------------------------------------------------------------------------------------------------------------------------------------------------------------------|--------|
| Cs2g03260 | K00162 pyruvate dehydrogenase E1 component beta subunit [EC:1.2.4.1]   (RefSeq) pyruvate dehydrogenase E1 component subunit beta-3, chloroplastic-like (A)                                                   | Pyruvate dehydrogenase E1 component subunit beta-3, chloroplastic; EC=1.2.4.1; Flags: Precursor (At2g34590)                                                                                                                                                                                                                     | 2.142  |
| Cs8g06950 | K00162 pyruvate dehydrogenase E1 component beta subunit [EC:1.2.4.1]   (RefSeq) pyruvate dehydrogenase E1 component subunit beta-3, chloroplastic (A)                                                        | Pyruvate dehydrogenase E1 component subunit beta-3, chloroplastic; EC=1.2.4.1; Flags: Precursor (At2g34590)                                                                                                                                                                                                                     | 1.832  |
| Cs6g08630 | K00232 acyl-CoA oxidase [EC:1.3.3.6]   (RefSeq) acyl-coenzyme A oxidase 4, peroxisomal-like (A)                                                                                                              | Acyl-coenzyme A oxidase 4, peroxisomal; AOX 4; EC=1.3.3.6; G6p; Short-chain acyl-CoA oxidase; AtCX4; AtG6; SAOX (At3g51840)                                                                                                                                                                                                     | 1.544  |
| Cs7g19160 | K00261 glutamate dehydrogenase (NAD(P)+) [EC:1.4.1.3]   (RefSeq) glutamate dehydrogenase 2 (A)                                                                                                               | Glutamate dehydrogenase 2; GDH 2; EC=1.4.1.3 (At5g07440)                                                                                                                                                                                                                                                                        | -2.490 |
| Cs4g18520 | K00281 glycine dehydrogenase [EC:1.4.4.2]   (RefSeq) glycine dehydrogenase (decarboxylating), mitochondrial (A)                                                                                              | Glycine dehydrogenase (decarboxylating) A, mitochondrial; EC=1.4.4.2; Glycine cleavage system P protein A; Glycine decarboxylase A; Glycine dehydrogenase (aminomethyl-transferring) A; Flags: Precursor (At4g33010)                                                                                                            | -1.360 |
| Cs9g02470 | K00382 dihydrolipoamide dehydrogenase [EC:1.8.1.4]   (RefSeq) dihydrolipoamide dehydrogenase 2, chloroplastic-like (A)                                                                                       | Dihydrolipoamide dehydrogenase 1, chloroplastic; ptLPD1; EC=1.8.1.4; Dihydrolipoamide dehydrogenase 1; Protein LIPOAMIDE DEHYDROGENASE 1; Pyruvate dehydrogenase complex E3 subunit 1; E3-1; PDC-E3 1; Flags: Precursor (At3g16950)                                                                                             | 2.130  |
| novel.780 | K00600 glycine hydroxymethyltransferase [EC:2.1.2.1]   (RefSeq) serine hydroxymethyltransferase 3, chloroplastic (A)                                                                                         | Serine hydroxymethyltransferase 3, chloroplastic; AtSHMT3; EC=2.1.2.1; Glycine hydroxymethyltransferase 3; Serine methylase 3; Flags: Precursor (At4g32520)                                                                                                                                                                     | 3.137  |
| Cs5g09210 | K00616 transaldolase [EC:2.2.1.2]   (RefSeq) transaldolase (A)                                                                                                                                               | (At1g12230)                                                                                                                                                                                                                                                                                                                     | 1.331  |
| Cs3g22480 | K00627 pyruvate dehydrogenase E2 component (dihydrolipoamide acetyltransferase) [EC:2.3.1.12]   (RefSeq) dihydrolipoamide acetyltransferase component 5 of pyruvate dehydrogenase complex, chloroplastic (A) | Dihydrolipoamide acetyltransferase component 5 of pyruvate dehydrogenase complex, chloroplastic; EC=2.3.1.12; Dihydrolipoamide S-acetyltransferase component 5 of pyruvate dehydrogenase complex; Protein EMBRYO DEFECTIVE 3003; Pyruvate dehydrogenase complex component E2 5; PDC-E2 5; PDCE2 5; Flags: Precursor (At1g34430) | 2.150  |
| Cs7g13170 | K00627 pyruvate dehydrogenase E2 component (dihydrolipoamide acetyltransferase) [EC:2.3.1.12]   (RefSeq) dihydrolipoamide acetyltransferase component 4 of pyruvate dehydrogenase complex, chloroplastic (A) | Dihydrolipoamide acetyltransferase component 4 of pyruvate dehydrogenase complex, chloroplastic; EC=2.3.1.12; Dihydrolipoamide S-acetyltransferase component 4 of pyruvate dehydrogenase complex; Pyruvate dehydrogenase complex component E2 4; PDC-E2 4; PDCE2 4; pIE2; Flags: Precursor (At3g25860)                          | 1.902  |
| Cs4g08990 | K00640 serine O-acetyltransferase [EC:2.3.1.30]   (RefSeq) serine acetyltransferase 1, chloroplastic-like (A)                                                                                                | Serine acetyltransferase 3, mitochondrial; AtSAT-3; AtSERAT2; SAT-m; EC=2.3.1.30; Flags: Precursor (At3g13110)                                                                                                                                                                                                                  | 1.245  |
| Cs1g15840 | K00844 hexokinase [EC:2.7.1.1]   (RefSeq) hexokinase-1-like (A)                                                                                                                                              | Hexokinase-1; EC=2.7.1.1; NtHxK1 (At4g29130)                                                                                                                                                                                                                                                                                    | -2.510 |
| Cs3g26050 | K00844 hexokinase [EC:2.7.1.1]   (RefSeq) hexokinase-2, chloroplastic (A)                                                                                                                                    | Hexokinase-2, chloroplastic; EC=2.7.1.1; NtHxK2; Flags: Precursor (At1g47840)                                                                                                                                                                                                                                                   | 1.128  |

|            |                                                                                                                                                                  |                                                                                                                                                                                                                                                                                                                                  |        |
|------------|------------------------------------------------------------------------------------------------------------------------------------------------------------------|----------------------------------------------------------------------------------------------------------------------------------------------------------------------------------------------------------------------------------------------------------------------------------------------------------------------------------|--------|
| Cs1g15970  | K00850 6-phosphofructokinase 1 [EC:2.7.1.11]   (RefSeq) ATP-dependent 6-phosphofructokinase 3-like (A)                                                           | ATP-dependent 6-phosphofructokinase 3 {ECO:0000255 HAMAP-Rule:MF_03186}; ATP-PFK 3 {ECO:0000255 HAMAP-Rule:MF_03186}; Phosphofructokinase 3 {ECO:0000255 HAMAP-Rule:MF_03186}; EC=2.7.1.11 {ECO:0000255 HAMAP-Rule:MF_03186}; Phosphohexokinase 3 {ECO:0000255 HAMAP-Rule:MF_03186} (At4g29220)                                  | 1.165  |
| Cs1g20200  | K00850 6-phosphofructokinase 1 [EC:2.7.1.11]   (RefSeq) ATP-dependent 6-phosphofructokinase 5, chloroplastic (A)                                                 | ATP-dependent 6-phosphofructokinase 5, chloroplastic {ECO:0000255 HAMAP-Rule:MF_03186}; ATP-PFK 5 {ECO:0000255 HAMAP-Rule:MF_03186}; Phosphofructokinase 5 {ECO:0000255 HAMAP-Rule:MF_03186}; EC=2.7.1.11 {ECO:0000255 HAMAP-Rule:MF_03186}; Phosphohexokinase 5 {ECO:0000255 HAMAP-Rule:MF_03186}; Flags: Precursor (At2g22480) | 1.593  |
| Cs4g18980  | K00850 6-phosphofructokinase 1 [EC:2.7.1.11]   (RefSeq) ATP-dependent 6-phosphofructokinase 6 (A)                                                                | ATP-dependent 6-phosphofructokinase 3 {ECO:0000255 HAMAP-Rule:MF_03186}; ATP-PFK 3 {ECO:0000255 HAMAP-Rule:MF_03186}; Phosphofructokinase 3 {ECO:0000255 HAMAP-Rule:MF_03186}; EC=2.7.1.11 {ECO:0000255 HAMAP-Rule:MF_03186}; Phosphohexokinase 3 {ECO:0000255 HAMAP-Rule:MF_03186} (At4g32840)                                  | -2.038 |
| Cs8g03650  | K00873 pyruvate kinase [EC:2.7.1.40]   (RefSeq) pyruvate kinase isozyme A, chloroplastic-like (A)                                                                | Pyruvate kinase isozyme A, chloroplastic; EC=2.7.1.40; Flags: Precursor (At3g22960)                                                                                                                                                                                                                                              | 2.299  |
| Cs9g07880  | K00873 pyruvate kinase [EC:2.7.1.40]   (RefSeq) pyruvate kinase isozyme A, chloroplastic (A)                                                                     | Pyruvate kinase isozyme A, chloroplastic; EC=2.7.1.40; Flags: Precursor (At3g22960)                                                                                                                                                                                                                                              | 1.213  |
| Cs9g18710  | K00873 pyruvate kinase [EC:2.7.1.40]   (RefSeq) plastidial pyruvate kinase 2 (A)                                                                                 | Plastidial pyruvate kinase 2; PKp2; EC=2.7.1.40; Plastidial pyruvate kinase 1; PKP1; Pyruvate kinase III; Pyruvate kinase isozyme B1, chloroplastic; PKP-BETA1; Plastidic pyruvate kinase beta subunit 1; Flags: Precursor (At5g52920)                                                                                           | 1.963  |
| Cs9g05370  | K01006 pyruvate, orthophosphate dikinase [EC:2.7.9.1]   (RefSeq) pyruvate, phosphate dikinase, chloroplastic (A)                                                 | Pyruvate, phosphate dikinase, chloroplastic; EC=2.7.9.1 {ECO:0000250 UniProtKB:P11155}; Pyruvate, orthophosphate dikinase; Flags: Precursor (At4g15530)                                                                                                                                                                          | 2.484  |
| Cs7g31640  | K01100 sedoheptulose-bisphosphatase [EC:3.1.3.37]   (RefSeq) sedoheptulose-1,7-bisphosphatase, chloroplastic (A)                                                 | Sedoheptulose-1,7-bisphosphatase, chloroplastic; EC=3.1.3.37; SED(1,7)P2ase; Sedoheptulose bisphosphatase; SBPase; Flags: Precursor (At3g55800)                                                                                                                                                                                  | 7.295  |
| Cs2g15520  | K01595 phosphoenolpyruvate carboxylase [EC:4.1.1.31]   (RefSeq) phosphoenolpyruvate carboxylase 2 (A)                                                            | Phosphoenolpyruvate carboxylase 2; AtPPC2; PEPC 2; PEPCase 2; EC=4.1.1.31 (At3g14940)                                                                                                                                                                                                                                            | -1.299 |
| novel.2308 | K01601 ribulose-bisphosphate carboxylase large chain [EC:4.1.1.39]   (RefSeq) rbcL, CisiCp029; ribulose-1,5-bisphosphate carboxylase/oxygenase large subunit (A) | Ribulose bisphosphate carboxylase large chain; RuBisCO large subunit; EC=4.1.1.39; Flags: Fragment (AtCh031)                                                                                                                                                                                                                     | 1.911  |
| Cs1g20920  | K01610 phosphoenolpyruvate carboxykinase (ATP) [EC:4.1.1.49]   (RefSeq) phosphoenolpyruvate carboxykinase [ATP]-like (A)                                         | Phosphoenolpyruvate carboxykinase (ATP); PEP carboxykinase; PEPCCK; EC=4.1.1.49 (At4g37870)                                                                                                                                                                                                                                      | -1.471 |

|                 |                                                                                                                                                                                       |                                                                                                                                                                                                                                                                               |        |
|-----------------|---------------------------------------------------------------------------------------------------------------------------------------------------------------------------------------|-------------------------------------------------------------------------------------------------------------------------------------------------------------------------------------------------------------------------------------------------------------------------------|--------|
| Cs5g06930       | K01638 malate synthase [EC:2.3.3.9]   (RefSeq) malate synthase, glyoxysomal (A)                                                                                                       | Malate synthase, glyoxysomal; EC=2.3.3.9 (At5g03860)                                                                                                                                                                                                                          | -1.677 |
| Cs7g26180       | K01689 enolase [EC:4.2.1.11]   (RefSeq) enolase 1, chloroplastic (A)                                                                                                                  | Enolase 1, chloroplastic; EC=4.2.1.11; 2-phospho-D-glycerate hydro-lyase 1; 2-phosphoglycerate dehydratase 1; Flags: Precursor (At1g74030)                                                                                                                                    | 1.238  |
| Cs3g11500       | K01738 cysteine synthase A [EC:2.5.1.47]   (RefSeq) bifunctional L-3-cyanoalanine synthase/cysteine synthase D2-like (A)                                                              | Bifunctional L-3-cyanoalanine synthase/cysteine synthase D2; EC=2.5.1.47 {ECO:0000269 PubMed:10845460}; EC=4.4.1.9 {ECO:0000269 PubMed:10845460}; Beta-substituted Ala synthase 4;2; ARAth-Bsas4;2; Cysteine synthase D2; AtcysD2; O-acetylserine (thiol)-lyase 6 (At5g28020) | 1.614  |
| novel.1307      | K01738 cysteine synthase A [EC:2.5.1.47]   (RefSeq) cysteine synthase-like (A)                                                                                                        | --                                                                                                                                                                                                                                                                            | 1.632  |
| Cs7g32500       | K01803 triosephosphate isomerase (TIM) [EC:5.3.1.1]   (RefSeq) triosephosphate isomerase, cytosolic (A)                                                                               | Triosephosphate isomerase, cytosolic; TIM; Triose-phosphate isomerase; EC=5.3.1.1 (At3g55440)                                                                                                                                                                                 | -1.019 |
| Cs9g02530       | K01913 acetate---CoA ligase [EC:6.2.1.1]   (RefSeq) acetate/butyrate--CoA ligase AAE7, peroxisomal-like (A)                                                                           | Acetate/butyrate--CoA ligase AAE7, peroxisomal; EC=6.2.1.1; EC=6.2.1.2; AMP-binding protein 7; AtAMPBP7; Acetyl-CoA synthetase; Acyl-activating enzyme 7; Butyryl-CoA synthetase; Protein ACETATE NON-UTILIZING 1 (At3g16910)                                                 | -1.387 |
| Cs9g02540       | K01913 acetate---CoA ligase [EC:6.2.1.1]   (RefSeq) acetate/butyrate--CoA ligase AAE7, peroxisomal-like (A)                                                                           | Acetate/butyrate--CoA ligase AAE7, peroxisomal; EC=6.2.1.1; EC=6.2.1.2; AMP-binding protein 7; AtAMPBP7; Acetyl-CoA synthetase; Acyl-activating enzyme 7; Butyryl-CoA synthetase; Protein ACETATE NON-UTILIZING 1 (At3g16910)                                                 | -2.024 |
| Cs9g02550       | K01913 acetate---CoA ligase [EC:6.2.1.1]   (RefSeq) acetate/butyrate--CoA ligase AAE7, peroxisomal-like (A)                                                                           | Acetate/butyrate--CoA ligase AAE7, peroxisomal; EC=6.2.1.1; EC=6.2.1.2; AMP-binding protein 7; AtAMPBP7; Acetyl-CoA synthetase; Acyl-activating enzyme 7; Butyryl-CoA synthetase; Protein ACETATE NON-UTILIZING 1 (At3g16910)                                                 | 3.002  |
| orange1.1t02049 | K01938 formate--tetrahydrofolate ligase [EC:6.3.4.3]   (RefSeq) formate--tetrahydrofolate ligase (A)                                                                                  | Formate--tetrahydrofolate ligase; EC=6.3.4.3; 10-formyltetrahydrofolate synthetase; FHS; FTHFS; Formyltetrahydrofolate synthetase (At1g50480)                                                                                                                                 | -1.099 |
| Cs4g04540       | K01961 acetyl-CoA carboxylase, biotin carboxylase subunit [EC:6.4.1.2 6.3.4.14]   (RefSeq) biotin carboxylase 2, chloroplastic (A)                                                    | Biotin carboxylase 2, chloroplastic; EC=6.3.4.14; Acetyl-CoA carboxylase subunit A 2; ACC; EC=6.4.1.2; Flags: Precursor (At5g35360)                                                                                                                                           | 2.293  |
| Cs6g07610       | K01962 acetyl-CoA carboxylase carboxyl transferase subunit alpha [EC:6.4.1.2 2.1.3.15]   (RefSeq) acetyl-coenzyme A carboxylase carboxyl transferase subunit alpha, chloroplastic (A) | Acetyl-coenzyme A carboxylase carboxyl transferase subunit alpha, chloroplastic; ACCase subunit alpha; Acetyl-CoA carboxylase carboxyltransferase subunit alpha; EC=6.4.1.2; Flags: Precursor (At2g38040)                                                                     | 2.188  |
| Cs6g02920       | K02160 acetyl-CoA carboxylase biotin carboxyl carrier protein   (RefSeq) biotin carboxyl carrier protein of acetyl-CoA carboxylase, chloroplastic (A)                                 | Biotin carboxyl carrier protein of acetyl-CoA carboxylase, chloroplastic; BCCP; Flags: Precursor (At5g16390)                                                                                                                                                                  | 1.749  |
| Cs6g22090       | K02160 acetyl-CoA carboxylase biotin carboxyl carrier protein   (RefSeq) biotin carboxyl carrier protein of acetyl-CoA carboxylase 2, chloroplastic (A)                               | Biotin carboxyl carrier protein of acetyl-CoA carboxylase 2, chloroplastic; AtBCCP2; BCCP-2; Flags: Precursor (At5g15530)                                                                                                                                                     | 3.136  |

|                                                                          |                                                                                                                                                                    |                                                                                                                                                                                                                                                                                |        |
|--------------------------------------------------------------------------|--------------------------------------------------------------------------------------------------------------------------------------------------------------------|--------------------------------------------------------------------------------------------------------------------------------------------------------------------------------------------------------------------------------------------------------------------------------|--------|
| Cs7g22860                                                                | K02437 glycine cleavage system H protein   (RefSeq) glycine cleavage system H protein, mitochondrial (A)                                                           | Glycine cleavage system H protein, mitochondrial; Flags: Precursor (At1g32470)                                                                                                                                                                                                 | -1.613 |
| Cs3g27290                                                                | K03781 catalase [EC:1.11.1.6]   (RefSeq) catalase isozyme 1 (A)                                                                                                    | Catalase isozyme 1; EC=1.11.1.6 (At4g35090)                                                                                                                                                                                                                                    | 1.257  |
| orange1.1t00386                                                          | K13034 L-3-cyanoalanine synthase/ cysteine synthase [EC:2.5.1.47 4.4.1.9]   (RefSeq) bifunctional L-3-cyanoalanine synthase/cysteine synthase 1, mitochondrial (A) | L-3-cyanoalanine synthase 2, mitochondrial; MdCAS2; EC=4.4.1.9; Flags: Precursor (At3g61440)                                                                                                                                                                                   | 4.935  |
| Cs4g16050                                                                | K14454 aspartate aminotransferase, cytoplasmic [EC:2.6.1.1]   (RefSeq) aspartate aminotransferase, cytoplasmic (A)                                                 | Aspartate aminotransferase, cytoplasmic; EC=2.6.1.1; Transaminase A (At5g11520)                                                                                                                                                                                                | -1.328 |
| Cs2g15280                                                                | K14455 aspartate aminotransferase, mitochondrial [EC:2.6.1.1]   (RefSeq) aspartate aminotransferase, mitochondrial-like (A)                                        | Aspartate aminotransferase, mitochondrial; EC=2.6.1.1; Transaminase A; Flags: Precursor (At2g30970)                                                                                                                                                                            | -1.142 |
| Cs8g02560                                                                | K15893 hydroxypyruvate reductase 1   (RefSeq) glycerate dehydrogenase (A)                                                                                          | Glycerate dehydrogenase HPR, peroxisomal; GDH; EC=1.1.1.29; NADH-dependent hydroxypyruvate reductase 1; AtHPR1; HPR 1 (At1g68010)                                                                                                                                              | -1.532 |
| Cs2g18580                                                                | K18121 glyoxylate/succinic semialdehyde reductase [EC:1.1.1.79 1.1.1.-]   (RefSeq) glyoxylate/succinic semialdehyde reductase 1 (A)                                | Glyoxylate/succinic semialdehyde reductase 1; AtGLYR1; AtGR1; SSA reductase 1; EC=1.1.1.79 {ECO:0000269 Ref.7, ECO:0000269 Ref.8}; EC=1.1.1.n11 {ECO:0000269 Ref.7, ECO:0000269 Ref.8}; Gamma-hydroxybutyrate dehydrogenase {ECO:0000303 PubMed:12882961}; AtGHBDH (At3g25530) | 2.453  |
| <b><i>Carbohydrate biosynthetic process (GO:0016051, P = 0.3543)</i></b> |                                                                                                                                                                    |                                                                                                                                                                                                                                                                                |        |
| orange1.1t04027                                                          | K10999 cellulose synthase A [EC:2.4.1.12]   (RefSeq) probable cellulose synthase A catalytic subunit 3 [UDP-forming] (A)                                           | Probable cellulose synthase A catalytic subunit 5 [UDP-forming]; EC=2.4.1.12; OsCesA5 (At4g39350)                                                                                                                                                                              | 5.650  |
| Cs6g21350                                                                | K14413 beta-1,3-galactosyltransferase [EC:2.4.1.-]   (RefSeq) beta-1,3-galactosyltransferase 15-like (A)                                                           | Beta-1,3-galactosyltransferase GALT1 {ECO:0000305}; EC=2.4.1.- {ECO:0000269 PubMed:17630273}; Beta-1,3-galactosyltransferase 15 {ECO:0000305}; Galactosyltransferase 1 {ECO:0000303 PubMed:17630273} (At1g26810)                                                               | 2.884  |
| Cs1g03980                                                                | K10999 cellulose synthase A [EC:2.4.1.12]   (RefSeq) cellulose synthase A catalytic subunit 7 [UDP-forming] (A)                                                    | Cellulose synthase-like protein B4; AtCslB4; EC=2.4.1.- (At2g32540)                                                                                                                                                                                                            | 2.987  |
| Cs4g08470                                                                | K10999 cellulose synthase A [EC:2.4.1.12]   (RefSeq) cellulose synthase A catalytic subunit 7 [UDP-forming]-like (A)                                               | Cellulose synthase-like protein E6; EC=2.4.1.-; OsCslE6 (At1g55850)                                                                                                                                                                                                            | 2.946  |
| Cs6g17600                                                                | K00847 fructokinase [EC:2.7.1.4]   (RefSeq) probable fructokinase-6, chloroplastic (A)                                                                             | Probable fructokinase-6, chloroplastic; EC=2.7.1.4; Flags: Precursor (At1g66430)                                                                                                                                                                                               | 2.521  |
| Cs1g20920                                                                | K01610 phosphoenolpyruvate carboxykinase (ATP) [EC:4.1.1.49]   (RefSeq) phosphoenolpyruvate carboxykinase [ATP]-like (A)                                           | Phosphoenolpyruvate carboxykinase (ATP); PEP carboxykinase; PEPC; EC=4.1.1.49 (At4g37870)                                                                                                                                                                                      | -1.471 |
| Cs9g08730                                                                | K10999 cellulose synthase A [EC:2.4.1.12]   (RefSeq) cellulose synthase A catalytic subunit 7 [UDP-forming] (A)                                                    | Cellulose synthase-like protein G2; AtCslG2; EC=2.4.1.- (At4g24000)                                                                                                                                                                                                            | 2.580  |

|                 |                                                                                                                                                                 |                                                                                                                                                                                                                                                                                                                                                                           |        |
|-----------------|-----------------------------------------------------------------------------------------------------------------------------------------------------------------|---------------------------------------------------------------------------------------------------------------------------------------------------------------------------------------------------------------------------------------------------------------------------------------------------------------------------------------------------------------------------|--------|
| Cs5g10530       | K01784 UDP-glucose 4-epimerase [EC:5.1.3.2]   (RefSeq) bifunctional UDP-glucose 4-epimerase and UDP-xylose 4-epimerase 1-like (A)                               | Bifunctional UDP-glucose 4-epimerase and UDP-xylose 4-epimerase 1; EC=5.1.3.2; EC=5.1.3.5; UDP-D-xylose 4-epimerase; UDP-L-arabinose 4-epimerase; UDP-galactose 4-epimerase 1; UDP-glucose 4-epimerase 1; AtUGE1 (At1g12780)                                                                                                                                              | -2.571 |
| Cs5g24680       | K20547 basic endochitinase B [EC:3.2.1.14]   (RefSeq) basic endochitinase (A)                                                                                   | Chitinase-like protein 1; AtCTL1; Protein ANION ALTERED ROOT MORPHOLOGY; Protein ECTOPIC DEPOSITION OF LIGNIN IN PITH 1; Protein ECTOPIC ROOT HAIR 2; Protein POM-POM1; Protein SENSITIVE TO HOT TEMPERATURES 2; Flags: Precursor (At1g05850)                                                                                                                             | -1.617 |
| Cs5g01970       | K10999 cellulose synthase A [EC:2.4.1.12]   (RefSeq) cellulose synthase A catalytic subunit 7 [UDP-forming] (A)                                                 | Cellulose synthase-like protein G3; AtCslG3; EC=2.4.1.- (At4g23990)                                                                                                                                                                                                                                                                                                       | 2.597  |
| orange1.1t00439 | K11714 rhamnogalacturonan II specific xylosyltransferase [EC:2.4.2.-]   (RefSeq) UDP-D-xylose:L-fucose alpha-1,3-D-xylosyltransferase MGP4 (A)                  | UDP-D-xylose:L-fucose alpha-1,3-D-xylosyltransferase MGP4 {ECO:0000305}; EC=2.4.2.- {ECO:0000305}; Protein MALE GAMETOPHYTE DEFECTIVE 4 {ECO:0000303 PubMed:21288267}; Rhamnogalacturonan xylosyltransferase MGP4 {ECO:0000305} (At4g01220)                                                                                                                               | -1.654 |
| Cs7g31640       | K01100 sedoheptulose-bisphosphatase [EC:3.1.3.37]   (RefSeq) sedoheptulose-1,7-bisphosphatase, chloroplastic (A)                                                | Sedoheptulose-1,7-bisphosphatase, chloroplastic; EC=3.1.3.37; SED(1,7)P2ase; Sedoheptulose bisphosphatase; SBPase; Flags: Precursor (At3g55800)                                                                                                                                                                                                                           | 7.295  |
| Cs3g21530       | K10999 cellulose synthase A [EC:2.4.1.12]   (RefSeq) cellulose synthase A catalytic subunit 2 [UDP-forming]-like (A)                                            | Cellulose synthase A catalytic subunit 6 [UDP-forming]; AtCesA6; EC=2.4.1.12; AraxCelA; Isoxaben-resistant protein 2; Protein PROCUSTE 1; Protein QUILL (At5g64740)                                                                                                                                                                                                       | -2.390 |
| Cs5g01960       | K10999 cellulose synthase A [EC:2.4.1.12]   (RefSeq) cellulose synthase A catalytic subunit 7 [UDP-forming]-like (A)                                            | Cellulose synthase-like protein G3; AtCslG3; EC=2.4.1.- (At4g23990)                                                                                                                                                                                                                                                                                                       | 2.555  |
| Cs1g13150       | K11864 BRCA1/BRCA2-containing complex subunit 3 [EC:3.4.19.-]   (RefSeq) lys-63-specific deubiquitinase BRCC36 (A)                                              | COP9 signalosome complex subunit 5b; Signalosome subunit 5b; EC=3.4.-.-; Jun activation domain-binding homolog 2 (At3g06820)                                                                                                                                                                                                                                              | 1.033  |
| Cs1g21630       | K08238 xyloglucan 6-xylosyltransferase [EC:2.4.2.39]   (RefSeq) xyloglucan 6-xylosyltransferase 2-like (A)                                                      | Putative glycosyltransferase 7; AtGT7; EC=2.4.-.- (At5g07720)                                                                                                                                                                                                                                                                                                             | -1.723 |
| Cs4g03480       | K20884 riboflavin kinase / FMN hydrolase [EC:2.7.1.26 3.1.3.102]   (RefSeq) bifunctional riboflavin kinase/FMN phosphatase (A)                                  | (DL)-glycerol-3-phosphatase 2; EC=3.1.3.21; Glycerol-1-phosphatase 2; Haloacid dehalogenase-like hydrolase domain-containing protein GPP2 (At5g57440)                                                                                                                                                                                                                     | -1.545 |
| Cs7g11730       | K13379 reversibly glycosylated polypeptide / UDP-arabinopyranose mutase [EC:2.4.1.- 5.4.99.30]   (RefSeq) alpha-1,4-glucan-protein synthase [UDP-forming] 2 (A) | Probable UDP-arabinopyranose mutase 2 {ECO:0000305}; EC=5.4.99.30 {ECO:0000250 UniProtKB:Q8H8T0}; Reversibly glycosylated polypeptide 2 {ECO:0000303 PubMed:10580281}; RGP2 {ECO:0000303 PubMed:10580281}; UDP-L-arabinose mutase 2 {ECO:0000305}; UDP-glucose:protein transglucosylase 2 {ECO:0000303 PubMed:10580281}; UPTG 2 {ECO:0000303 PubMed:10580281} (At3g08900) | -1.635 |

|                 |                                                                                                                                               |                                                                                                                                                                                                                                                                                 |        |
|-----------------|-----------------------------------------------------------------------------------------------------------------------------------------------|---------------------------------------------------------------------------------------------------------------------------------------------------------------------------------------------------------------------------------------------------------------------------------|--------|
| novel.1236      | K18801 glucuronoxylan 4-O-methyltransferase [EC:2.1.1.112]   (RefSeq) glucuronoxylan 4-O-methyltransferase 3 (A)                              | Probable methyltransferase At1g27930; EC=2.1.1.- {ECO:0000305} (At1g67330)                                                                                                                                                                                                      | -1.652 |
| novel.1237      | K18801 glucuronoxylan 4-O-methyltransferase [EC:2.1.1.112]   (RefSeq) glucuronoxylan 4-O-methyltransferase 3 (A)                              | Probable methyltransferase At1g27930; EC=2.1.1.- {ECO:0000305} (At1g67330)                                                                                                                                                                                                      | -1.611 |
| orange1.1t01675 | --                                                                                                                                            | Calvin cycle protein CP12-2, chloroplastic; CP12 domain-containing protein 2; Chloroplast protein 12-2; Flags: Precursor (At3g62410)                                                                                                                                            | 1.810  |
| Cs9g01920       | K03377 N-acetylneuraminate 9-O-acetyltransferase [EC:2.3.1.45]   (RefSeq) protein REDUCED WALL ACETYLATION 2 (A)                              | Protein REDUCED WALL ACETYLATION 2 {ECO:0000303 PubMed:21212300, ECO:0000303 PubMed:21673009}; EC=2.3.1.- {ECO:0000305} (At3g06550)                                                                                                                                             | -1.635 |
| Cs3g25210       | K15400 omega-hydroxypalmitate O-feruloyl transferase [EC:2.3.1.188]   (RefSeq) omega-hydroxypalmitate O-feruloyl transferase (A)              | Omega-hydroxypalmitate O-feruloyl transferase; EC=2.3.1.188; Omega-hydroxyacid hydroxycinnamoyltransferase; Protein ALIPHATIC SUBERIN FERULOYL TRANSFERASE (At1g27620)                                                                                                          | -2.824 |
| orange1.1t01334 | K23280 rhamnogalacturonan I rhamnosyltransferase [EC:2.4.1.351]   (RefSeq) O-fucosyltransferase 3 isoform X1 (A)                              | Protein MANNAN SYNTHESIS-RELATED 1 {ECO:0000303 PubMed:22966747}; AtMSR1 {ECO:0000303 PubMed:22966747}; EC=2.4.1.- {ECO:0000305}; O-fucosyltransferase 25 {ECO:0000305}; O-FucT-25 {ECO:0000305}; O-fucosyltransferase family protein {ECO:0000312 EMBL:ARJ31429.1} (At3g21190) | -1.752 |
| Cs7g32500       | K01803 triosephosphate isomerase (TIM) [EC:5.3.1.1]   (RefSeq) triosephosphate isomerase, cytosolic (A)                                       | Triosephosphate isomerase, cytosolic; TIM; Triose-phosphate isomerase; EC=5.3.1.1 (At3g55440)                                                                                                                                                                                   | -1.019 |
| orange1.1t01884 | K08679 UDP-glucuronate 4-epimerase [EC:5.1.3.6]   (RefSeq) UDP-glucuronate 4-epimerase 6 (A)                                                  | UDP-glucuronate 4-epimerase 6; EC=5.1.3.6; UDP-glucuronic acid epimerase 6; AtUGlcAE2 (At3g23820)                                                                                                                                                                               | -1.881 |
| Cs9g11050       | --                                                                                                                                            | Protein SULFUR DEFICIENCY-INDUCED 2 {ECO:0000305} (At1g04770)                                                                                                                                                                                                                   | -1.455 |
| orange1.1t00566 | K13679 granule-bound starch synthase [EC:2.4.1.242]   (RefSeq) GBSSII-2, SB2; granule-bound starch synthase 1, chloroplastic/amyloplastic (A) | Granule-bound starch synthase 1, chloroplastic/amyloplastic; EC=2.4.1.242; Granule-bound starch synthase I; GBSS-I; Flags: Precursor (At1g32900)                                                                                                                                | 1.659  |
| Cs6g17580       | K14190 GDP-L-galactose phosphorylase [EC:2.7.7.69]   (RefSeq) GDP-L-galactose phosphorylase 1-like (A)                                        | GDP-L-galactose phosphorylase 1; EC=2.7.7.69; Protein VITAMIN C DEFECTIVE 2 (At5g55120)                                                                                                                                                                                         | 1.636  |
| orange1.1t02029 | K11000 callose synthase [EC:2.4.1.-]   (RefSeq) callose synthase 3 (A)                                                                        | Callose synthase 3; EC=2.4.1.34; 1,3-beta-glucan synthase; Protein GLUCAN SYNTHASE-LIKE 12 (At5g13000)                                                                                                                                                                          | -1.221 |
| orange1.1t02222 | K23877 xyloglucan O-acetyltransferase   (RefSeq) protein ALTERED XYLOGLUCAN 4 (A)                                                             | Protein trichome birefringence (At5g06700)                                                                                                                                                                                                                                      | -1.138 |
| Cs5g33680       | K20893 probable galacturonosyltransferase-like 1 [EC:2.4.1.-]   (RefSeq) probable galacturonosyltransferase-like 1 (A)                        | Probable galacturonosyltransferase-like 7; EC=2.4.1.- (At3g62660)                                                                                                                                                                                                               | -1.207 |
| Cs3g10840       | K10046 GDP-D-mannose 3', 5'-epimerase [EC:5.1.3.18 5.1.3.-]   (RefSeq) GDP-mannose 3,5-epimerase 1 (A)                                        | GDP-mannose 3,5-epimerase 1; GDP-Man 3,5-epimerase 1; EC=5.1.3.18; OsGME-1 (At5g28840)                                                                                                                                                                                          | -1.000 |

|            |                                                                                                                                                                  |                                                                                                                                                                                                                                |        |
|------------|------------------------------------------------------------------------------------------------------------------------------------------------------------------|--------------------------------------------------------------------------------------------------------------------------------------------------------------------------------------------------------------------------------|--------|
| Cs7g16400  | K23200 putative arabinosyltransferase [EC:2.4.2.-]   (RefSeq) probable arabinosyltransferase ARAD1 (A)                                                           | Probable arabinosyltransferase ARAD1; EC=2.4.2.-; Arabinan alpha-1,5-arabinosyltransferase; L-Arabinosyltransferase; Protein ARABINAN DEFICIENT 1 (At3g45400)                                                                  | -1.150 |
| Cs1g01700  | K01858 myo-inositol-1-phosphate synthase [EC:5.5.1.4]   (RefSeq) inositol-3-phosphate synthase (A)                                                               | Inositol-3-phosphate synthase; MIP synthase; EC=5.5.1.4; Myo-inositol 1-phosphate synthase; IPS; MI-1-P synthase (At2g22240)                                                                                                   | -1.646 |
| Cs5g05200  | K16055 trehalose 6-phosphate synthase/phosphatase [EC:2.4.1.15 3.1.3.12]   (RefSeq) probable alpha,alpha-trehalose-phosphate synthase [UDP-forming] 9 (A)        | Probable alpha,alpha-trehalose-phosphate synthase [UDP-forming] 9; EC=2.4.1.15; Trehalose-6-phosphate synthase 9; AtTPS9 (At1g23870)                                                                                           | -2.183 |
| Cs7g08390  | K16055 trehalose 6-phosphate synthase/phosphatase [EC:2.4.1.15 3.1.3.12]   (RefSeq) probable alpha,alpha-trehalose-phosphate synthase [UDP-forming] 9 (A)        | Probable alpha,alpha-trehalose-phosphate synthase [UDP-forming] 9; EC=2.4.1.15; Trehalose-6-phosphate synthase 9; AtTPS9 (At1g23870)                                                                                           | -2.070 |
| novel.2308 | K01601 ribulose-bisphosphate carboxylase large chain [EC:4.1.1.39]   (RefSeq) rbcL, CisiCp029; ribulose-1,5-bisphosphate carboxylase/oxygenase large subunit (A) | Ribulose bisphosphate carboxylase large chain; RuBisCO large subunit; EC=4.1.1.39; Flags: Fragment (AtCh031)                                                                                                                   | 1.911  |
| Cs2g18800  | K00975 glucose-1-phosphate adenyltransferase [EC:2.7.7.27]   (RefSeq) SB1, glgC; glucose-1-phosphate adenyltransferase small subunit 2, chloroplastic-like (A)   | Glucose-1-phosphate adenyltransferase small subunit 2, chloroplastic; EC=2.7.7.27; ADP-glucose pyrophosphorylase; ADP-glucose synthase; AGPase B; Alpha-D-glucose-1-phosphate adenyl transferase; Flags: Precursor (At5g48300) | 1.281  |
| Cs5g18370  | K18801 glucuronoxylan 4-O-methyltransferase [EC:2.1.1.112]   (RefSeq) glucuronoxylan 4-O-methyltransferase 3 (A)                                                 | Glucuronoxylan 4-O-methyltransferase 3; EC=2.1.1.112 (At1g33800)                                                                                                                                                               | -1.442 |
| Cs5g04310  | K13418 somatic embryogenesis receptor kinase 1 [EC:2.7.10.1 2.7.11.1]   (RefSeq) SERK, CitSERK; somatic embryogenesis receptor-like kinase (A)                   | LRR receptor-like serine/threonine-protein kinase FEI 1; EC=2.7.11.1; Flags: Precursor (At5g62710)                                                                                                                             | -1.181 |
| Cs1g23610  | K20893 probable galacturonosyltransferase-like 1 [EC:2.4.1.-]   (RefSeq) probable galacturonosyltransferase-like 1 (A)                                           | Probable galacturonosyltransferase-like 2; EC=2.4.1.- (At3g50760)                                                                                                                                                              | -1.549 |
| Cs8g07230  | K00975 glucose-1-phosphate adenyltransferase [EC:2.7.7.27]   (RefSeq) glgC; glucose-1-phosphate adenyltransferase large subunit 1-like (A)                       | Glucose-1-phosphate adenyltransferase large subunit 1; EC=2.7.7.27; ADP-glucose pyrophosphorylase; ADP-glucose synthase; AGPase S; Alpha-D-glucose-1-phosphate adenyl transferase; Flags: Fragment (At4g39210)                 | 1.598  |
| Cs6g08690  | K23877 xyloglucan O-acetyltransferase   (RefSeq) protein ALTERED XYLOGLUCAN 4 (A)                                                                                | Protein trichome birefringence-like 3 (At5g01360)                                                                                                                                                                              | -1.488 |
| Cs2g21100  | K10999 cellulose synthase A [EC:2.4.1.12]   (RefSeq) cellulose synthase A catalytic subunit 7 [UDP-forming]-like (A)                                             | Cellulose synthase-like protein B4; AtCslB4; EC=2.4.1.- (At2g32540)                                                                                                                                                            | 1.073  |
| novel.1980 | K01214 isoamylase [EC:3.2.1.68]   (RefSeq) isoamylase 1, chloroplastic (A)                                                                                       | Isoamylase 1, chloroplastic; AtISA1; EC=3.2.1.68; Flags: Precursor                                                                                                                                                             | -1.739 |
| Cs8g05250  | K18801 glucuronoxylan 4-O-methyltransferase [EC:2.1.1.112]   (RefSeq) glucuronoxylan 4-O-methyltransferase 3 (A)                                                 | Protein IRX15-LIKE (At5g67210)                                                                                                                                                                                                 | -1.527 |
| Cs7g30960  | K23877 xyloglucan O-acetyltransferase   (RefSeq) protein ALTERED XYLOGLUCAN 4 (A)                                                                                | Protein ESKIMO 1; Protein trichome birefringence-like 29 (At3g55990)                                                                                                                                                           | -1.004 |
|            |                                                                                                                                                                  |                                                                                                                                                                                                                                |        |

| <b>Carbohydrate catabolic process (GO:0016052, <math>P &lt; 0.0001</math>)</b> |                                                                                                                                                                                                                        |                                                                                                                                                                                                                                                                                                                                           |        |
|--------------------------------------------------------------------------------|------------------------------------------------------------------------------------------------------------------------------------------------------------------------------------------------------------------------|-------------------------------------------------------------------------------------------------------------------------------------------------------------------------------------------------------------------------------------------------------------------------------------------------------------------------------------------|--------|
| Cs8g01840                                                                      | K20547 basic endochitinase B [EC:3.2.1.14]   (RefSeq) chitinase; endochitinase-like (A)                                                                                                                                | Endochitinase CH25; EC=3.2.1.14; Flags: Precursor (At3g12500)                                                                                                                                                                                                                                                                             | -6.973 |
| novel.1746                                                                     | K01183 chitinase [EC:3.2.1.14]   (RefSeq) hevamine-A (A)                                                                                                                                                               | Acidic endochitinase; EC=3.2.1.14; Flags: Precursor (At5g24090)                                                                                                                                                                                                                                                                           | 5.686  |
| orange1.1t00435                                                                | K01183 chitinase [EC:3.2.1.14]   (RefSeq) hevamine-A (A)                                                                                                                                                               | Acidic endochitinase; EC=3.2.1.14; Flags: Precursor (At5g24090)                                                                                                                                                                                                                                                                           | 6.755  |
| Cs8g17580                                                                      | --                                                                                                                                                                                                                     | Chitinase 2; EC=3.2.1.14; Tulip bulb chitinase-2; TBC-2                                                                                                                                                                                                                                                                                   | 7.857  |
| Cs6g20790                                                                      | K09285 AP2-like factor, ANT lineage   (RefSeq) AP2-like ethylene-responsive transcription factor At1g16060 (A)                                                                                                         | Ethylene-responsive transcription factor WRI1; Protein ACTIVATOR OF SPORAMIN::LUC 1; Protein WRINKLED 1 (At1g16060)                                                                                                                                                                                                                       | 6.927  |
| Cs1g21260                                                                      | K01179 endoglucanase [EC:3.2.1.4]   (RefSeq) endoglucanase 2-like (A)                                                                                                                                                  | Endoglucanase 24; EC=3.2.1.4; Endo-1,4-beta glucanase 24; Flags: Precursor (At1g19940)                                                                                                                                                                                                                                                    | 6.669  |
| Cs7g04300                                                                      | K09285 AP2-like factor, ANT lineage   (RefSeq) AP2-like ethylene-responsive transcription factor At1g16060 (A)                                                                                                         | Ethylene-responsive transcription factor WRI1; Protein ACTIVATOR OF SPORAMIN::LUC 1; Protein WRINKLED 1 (At5g17430)                                                                                                                                                                                                                       | 9.012  |
| orange1.1t01398                                                                | K00864 glycerol kinase [EC:2.7.1.30]   (RefSeq) glycerol kinase (A)                                                                                                                                                    | Glycerol kinase; Glycerokinase; EC=2.7.1.30; ATP:glycerol 3-phosphotransferase; Protein GLYCEROL INSENSITIVE 1; Protein NONHOST RESISTANCE TO P. S. PHASEOLICOLA 1 (At1g80460)                                                                                                                                                            | 2.927  |
| novel.1576                                                                     | --                                                                                                                                                                                                                     | Chitinase 2; EC=3.2.1.14; Tulip bulb chitinase-2; TBC-2                                                                                                                                                                                                                                                                                   | 4.008  |
| Cs7g22230                                                                      | K01194 alpha,alpha-trehalase [EC:3.2.1.28]   (RefSeq) probable trehalase (A)                                                                                                                                           | Trehalase; EC=3.2.1.28; Alpha,alpha-trehalase; Alpha,alpha-trehalose glucohydrolase; Trehalase 1; AtTRE1 (At4g24040)                                                                                                                                                                                                                      | 3.256  |
| orange1.1t05835                                                                | K00161 pyruvate dehydrogenase E1 component alpha subunit [EC:1.2.4.1]   (RefSeq) pyruvate dehydrogenase E1 component subunit alpha-3, chloroplastic (A)                                                                | Pyruvate dehydrogenase E1 component subunit alpha-3, chloroplastic; EC=1.2.4.1; Flags: Precursor (At1g01090)                                                                                                                                                                                                                              | 2.430  |
| Cs1g05710                                                                      | --                                                                                                                                                                                                                     | Chitinase 2; EC=3.2.1.14; Tulip bulb chitinase-2; TBC-2                                                                                                                                                                                                                                                                                   | 10.931 |
| Cs3g22480                                                                      | K00627 pyruvate dehydrogenase E2 component (dihydrolipoamide acetyltransferase) [EC:2.3.1.12]   (RefSeq) dihydrolipoalysine-residue acetyltransferase component 5 of pyruvate dehydrogenase complex, chloroplastic (A) | Dihydrolipoalysine-residue acetyltransferase component 5 of pyruvate dehydrogenase complex, chloroplastic; EC=2.3.1.12; Dihydrolipoamide S-acetyltransferase component 5 of pyruvate dehydrogenase complex; Protein EMBRYO DEFECTIVE 3003; Pyruvate dehydrogenase complex component E2 5; PDC-E2 5; PDCE2 5; Flags: Precursor (At1g34430) | 2.150  |
| Cs8g01810                                                                      | K20547 basic endochitinase B [EC:3.2.1.14]   (RefSeq) endochitinase-like (A)                                                                                                                                           | Endochitinase A; CHN-A; EC=3.2.1.14; Flags: Precursor (At3g12500)                                                                                                                                                                                                                                                                         | -6.007 |
| Cs2g03760                                                                      | K19891 glucan endo-1,3-beta-glucosidase 1/2/3 [EC:3.2.1.39]   (RefSeq) glucan endo-1,3-beta-glucosidase 1 (A)                                                                                                          | Glucan endo-1,3-beta-D-glucosidase; EC=3.2.1.39; Major pollen allergen Ole e 9; AltName: Allergen=Ole e 9; Flags: Precursor (At1g78520)                                                                                                                                                                                                   | 2.906  |
| Cs1g20200                                                                      | K00850 6-phosphofructokinase 1 [EC:2.7.1.11]   (RefSeq) ATP-dependent 6-phosphofructokinase 5, chloroplastic (A)                                                                                                       | ATP-dependent 6-phosphofructokinase 5, chloroplastic {ECO:0000255 HAMAP-Rule:MF_03186}; ATP-PFK 5 {ECO:0000255 HAMAP-Rule:MF_03186}; Phosphofructokinase 5 {ECO:0000255 HAMAP-Rule:MF_03186}; EC=2.7.1.11 {ECO:0000255 HAMAP-Rule:MF_03186}; Phosphohexokinase 5 {ECO:0000255 HAMAP-Rule:MF_03186}; Flags: Precursor (At2g22480)          | 1.593  |

|                 |                                                                                                                                                                                                                |                                                                                                                                                                                                                                                                                                          |        |
|-----------------|----------------------------------------------------------------------------------------------------------------------------------------------------------------------------------------------------------------|----------------------------------------------------------------------------------------------------------------------------------------------------------------------------------------------------------------------------------------------------------------------------------------------------------|--------|
| Cs3g21000       | K01179 endoglucanase [EC:3.2.1.4]   (RefSeq) endoglucanase 12 (A)                                                                                                                                              | Endoglucanase 9; EC=3.2.1.4; Endo-1,4-beta glucanase 9; OsCel9D; OsGLU1 (At5g49720)                                                                                                                                                                                                                      | 9.252  |
| Cs1g05720       | K01051 pectinesterase [EC:3.1.1.11]   (RefSeq) pectinesterase-like (A)                                                                                                                                         | Putative pectinesterase/pectinesterase inhibitor 45; Includes: Pectinesterase inhibitor 45; Pectin methylesterase inhibitor 45; Includes: Pectinesterase 45; PE 45; EC=3.1.1.11; Pectin methylesterase 45; AtPME45 (At4g33230)                                                                           | 9.086  |
| Cs7g13170       | K00627 pyruvate dehydrogenase E2 component (dihydrolipoamide acetyltransferase) [EC:2.3.1.12]   (RefSeq) dihydrolipoamide S-acetyltransferase component 4 of pyruvate dehydrogenase complex, chloroplastic (A) | Dihydrolipoamide S-acetyltransferase component 4 of pyruvate dehydrogenase complex, chloroplastic; EC=2.3.1.12; Dihydrolipoamide S-acetyltransferase component 4 of pyruvate dehydrogenase complex; Pyruvate dehydrogenase complex component E2 4; PDC-E2 4; PDCE2 4; pIE2; Flags: Precursor (At3g25860) | 1.902  |
| orange1.1t05124 | K20547 basic endochitinase B [EC:3.2.1.14]   (RefSeq) endochitinase-like (A)                                                                                                                                   | Endochitinase A; CHN-A; EC=3.2.1.14; Flags: Precursor (At3g12500)                                                                                                                                                                                                                                        | -4.778 |
| Cs2g03260       | K00162 pyruvate dehydrogenase E1 component beta subunit [EC:1.2.4.1]   (RefSeq) pyruvate dehydrogenase E1 component subunit beta-3, chloroplastic-like (A)                                                     | Pyruvate dehydrogenase E1 component subunit beta-3, chloroplastic; EC=1.2.4.1; Flags: Precursor (At2g34590)                                                                                                                                                                                              | 2.142  |
| Cs4g06670       | K01051 pectinesterase [EC:3.1.1.11]   (RefSeq) pectinesterase-like (A)                                                                                                                                         | Probable pectinesterase/pectinesterase inhibitor 12; Includes: Pectinesterase inhibitor 12; Pectin methylesterase inhibitor 12; Includes: Pectinesterase 12; PE 12; EC=3.1.1.11; Pectin methylesterase 12; AtPME12; Flags: Precursor (At2g26440)                                                         | -2.741 |
| Cs5g34710       | K01728 pectate lyase [EC:4.2.2.2]   (RefSeq) probable pectate lyase 8 (A)                                                                                                                                      | Probable pectate lyase 10; EC=4.2.2.2; Flags: Precursor (At3g24670)                                                                                                                                                                                                                                      | -3.547 |
| Cs2g22040       | K01177 beta-amylase [EC:3.2.1.2]   (RefSeq) beta-amylase (A)                                                                                                                                                   | Beta-amylase; EC=3.2.1.2; 1,4-alpha-D-glucan maltohydrolase (At4g15210)                                                                                                                                                                                                                                  | -1.868 |
| Cs5g01775       | K01194 alpha,alpha-trehalase [EC:3.2.1.28]   (RefSeq) probable trehalase (A)                                                                                                                                   | Trehalase; EC=3.2.1.28; Alpha,alpha-trehalase; Alpha,alpha-trehalose glucohydrolase; Trehalase 1; AtTRE1 (At4g24040)                                                                                                                                                                                     | 2.169  |
| Cs5g01790       | K01194 alpha,alpha-trehalase [EC:3.2.1.28]   (RefSeq) probable trehalase (A)                                                                                                                                   | Trehalase; EC=3.2.1.28; Alpha,alpha-trehalase; Alpha,alpha-trehalose glucohydrolase; Trehalase 1; AtTRE1 (At4g24040)                                                                                                                                                                                     | 3.201  |
| Cs1g15840       | K00844 hexokinase [EC:2.7.1.1]   (RefSeq) hexokinase-1-like (A)                                                                                                                                                | Hexokinase-1; EC=2.7.1.1; NtHxK1 (At4g29130)                                                                                                                                                                                                                                                             | -2.510 |
| novel.2420      | K20547 basic endochitinase B [EC:3.2.1.14]   (RefSeq) endochitinase-like (A)                                                                                                                                   | Endochitinase 1; EC=3.2.1.14; Flags: Precursor (At3g12500)                                                                                                                                                                                                                                               | -4.471 |
| Cs1g02720       | K01179 endoglucanase [EC:3.2.1.4]   (RefSeq) endoglucanase 12-like (A)                                                                                                                                         | Endoglucanase 12; EC=3.2.1.4; Endo-1,4-beta glucanase 12; Flags: Precursor (At2g44540)                                                                                                                                                                                                                   | 1.774  |
| Cs9g12460       | K06617 raffinose synthase [EC:2.4.1.82]   (RefSeq) probable galactinol--sucrose galactosyltransferase 2 (A)                                                                                                    | Probable galactinol--sucrose galactosyltransferase 2; EC=2.4.1.82; Protein SEED IMBIBITION 2; Raffinose synthase 2 (At3g57520)                                                                                                                                                                           | 1.523  |
| Cs5g06440       | K06617 raffinose synthase [EC:2.4.1.82]   (RefSeq) probable galactinol--sucrose galactosyltransferase 2 (A)                                                                                                    | Probable galactinol--sucrose galactosyltransferase 2; EC=2.4.1.82; Protein SEED IMBIBITION 2; Raffinose synthase 2 (At3g57520)                                                                                                                                                                           | -2.473 |
| Cs5g02320       | K01179 endoglucanase [EC:3.2.1.4]   (RefSeq) endoglucanase 6 (A)                                                                                                                                               | Endoglucanase 6; EC=3.2.1.4; Endo-1,4-beta glucanase 6; Flags: Precursor (At1g64390)                                                                                                                                                                                                                     | -2.542 |
| Cs7g13250       | K15925 alpha-D-xyloside xylohydrolase [EC:3.2.1.177]   (RefSeq) alpha-xylosidase 1 (A)                                                                                                                         | Alpha-xylosidase 1; EC=3.2.1.177; Flags: Precursor (At1g68560)                                                                                                                                                                                                                                           | -1.649 |

|                 |                                                                                                        |                                                                                                                                                                                                                                                                                                                                                                                                                                                                           |        |
|-----------------|--------------------------------------------------------------------------------------------------------|---------------------------------------------------------------------------------------------------------------------------------------------------------------------------------------------------------------------------------------------------------------------------------------------------------------------------------------------------------------------------------------------------------------------------------------------------------------------------|--------|
| orange1.1t01780 | K20547 basic endochitinase B [EC:3.2.1.14]   (RefSeq) basic endochitinase (A)                          | Chitinase 10; EC=3.2.1.14; Pathogenesis related (PR)-3 chitinase 10; Flags: Precursor (At4g01700)                                                                                                                                                                                                                                                                                                                                                                         | 1.783  |
| Cs7g26180       | K01689 enolase [EC:4.2.1.11]   (RefSeq) enolase 1, chloroplastic (A)                                   | Enolase 1, chloroplastic; EC=4.2.1.11; 2-phospho-D-glycerate hydro-lyase 1; 2-phosphoglycerate dehydratase 1; Flags: Precursor (At1g74030)                                                                                                                                                                                                                                                                                                                                | 1.238  |
| Cs8g11330       | K01728 pectate lyase [EC:4.2.2.2]   (RefSeq) probable pectate lyase 1 (A)                              | Probable pectate lyase 1; EC=4.2.2.2; Pectate lyase A1; Flags: Precursor (At1g04680)                                                                                                                                                                                                                                                                                                                                                                                      | -2.404 |
| Cs3g25940       | K01179 endoglucanase [EC:3.2.1.4]   (RefSeq) endoglucanase 2-like (A)                                  | Endoglucanase 10; EC=3.2.1.4; Endo-1,4-beta glucanase 10; Flags: Precursor (At1g75680)                                                                                                                                                                                                                                                                                                                                                                                    | -2.240 |
| Cs4g06710       | K01051 pectinesterase [EC:3.1.1.11]   (RefSeq) pectinesterase (A)                                      | Probable pectinesterase/pectinesterase inhibitor 54; Includes: Pectinesterase inhibitor 54; Pectin methylesterase inhibitor 54; Includes: Pectinesterase 54; PE 54; EC=3.1.1.11; Pectin methylesterase 54; AtPME54; Flags: Precursor (At5g20860)                                                                                                                                                                                                                          | -2.168 |
| Cs1g16550       | K01051 pectinesterase [EC:3.1.1.11]   (RefSeq) PECS-1.1, PECS-1.2; pectinesterase (A)                  | Pectinesterase 3; PE 3; EC=3.1.1.11; Pectin methylesterase 3; Flags: Precursor (At3g14310)                                                                                                                                                                                                                                                                                                                                                                                | -1.732 |
| Cs1g15970       | K00850 6-phosphofructokinase 1 [EC:2.7.1.11]   (RefSeq) ATP-dependent 6-phosphofructokinase 3-like (A) | ATP-dependent 6-phosphofructokinase 3 {ECO:0000255 HAMAP-Rule:MF_03186}; ATP-PFK 3 {ECO:0000255 HAMAP-Rule:MF_03186}; Phosphofructokinase 3 {ECO:0000255 HAMAP-Rule:MF_03186}; EC=2.7.1.11 {ECO:0000255 HAMAP-Rule:MF_03186}; Phosphohexokinase 3 {ECO:0000255 HAMAP-Rule:MF_03186} (At4g29220)                                                                                                                                                                           | 1.165  |
| Cs8g01850       | K20547 basic endochitinase B [EC:3.2.1.14]   (RefSeq) endochitinase-like (A)                           | Endochitinase 1; EC=3.2.1.14; Flags: Precursor (At3g12500)                                                                                                                                                                                                                                                                                                                                                                                                                | -7.054 |
| Cs5g33420       | K01051 pectinesterase [EC:3.1.1.11]   (RefSeq) probable pectinesterase/pectinesterase inhibitor 7 (A)  | Probable pectinesterase/pectinesterase inhibitor 7; Includes: Pectinesterase inhibitor 7; Pectin methylesterase inhibitor 7; Includes: Pectinesterase 7; PE 7; EC=3.1.1.11; Pectin methylesterase 1; AtPME1; Pectin methylesterase 7; Flags: Precursor (At1g02810_1)                                                                                                                                                                                                      | -2.742 |
| Cs7g23860       | K05349 beta-glucosidase [EC:3.2.1.21]   (RefSeq) beta-glucosidase BoGH3B-like (A)                      | Beta-xylosidase/alpha-L-arabinofuranosidase 2 {ECO:0000303 PubMed:17615411, ECO:0000312 EMBL:ABQ45228.1}; Xylan 1,4-beta-xylosidase/Alpha-L-arabinofuranosidase 2; MsXyl2 {ECO:0000303 PubMed:17615411}; Includes: Beta-xylosidase; EC=3.2.1.37; 1,4-beta-D-xylan xylohydrolase {ECO:0000250 UniProtKB:P48792}; Xylan 1,4-beta-xylosidase; Includes: Alpha-L-arabinofuranosidase; Arabinosidase {ECO:0000250 UniProtKB:P48792}; EC=3.2.1.55; Flags: Precursor (At5g20950) | -1.339 |
| Cs2g07660       | K01051 pectinesterase [EC:3.1.1.11]   (RefSeq) pectinesterase-like (A)                                 | Pectinesterase/pectinesterase inhibitor; Includes: Pectinesterase inhibitor; Pectin methylesterase inhibitor; Includes: Pectinesterase; PE; EC=3.1.1.11; Pectin methylesterase; Flags: Precursor (At1g11580)                                                                                                                                                                                                                                                              | -1.746 |
| novel.171       | K01179 endoglucanase [EC:3.2.1.4]   (RefSeq) basic cellulase (A)                                       | Endoglucanase 9; EC=3.2.1.4; Cellulase 3; AtCEL3; Endo-1,4-beta glucanase 9; Flags: Precursor (At1g71380)                                                                                                                                                                                                                                                                                                                                                                 | 2.923  |

|                 |                                                                                                                                                                                                |                                                                                                                                                                                                                                                                                                                                                                                                                                                                           |        |
|-----------------|------------------------------------------------------------------------------------------------------------------------------------------------------------------------------------------------|---------------------------------------------------------------------------------------------------------------------------------------------------------------------------------------------------------------------------------------------------------------------------------------------------------------------------------------------------------------------------------------------------------------------------------------------------------------------------|--------|
| Cs7g32500       | K01803 triosephosphate isomerase (TIM) [EC:5.3.1.1]   (RefSeq) triosephosphate isomerase, cytosolic (A)                                                                                        | Triosephosphate isomerase, cytosolic; TIM; Triose-phosphate isomerase; EC=5.3.1.1 (At3g55440)                                                                                                                                                                                                                                                                                                                                                                             | -1.019 |
| Cs2g17090       | K01179 endoglucanase [EC:3.2.1.4]   (RefSeq) endoglucanase 8-like (A)                                                                                                                          | Endoglucanase 8; EC=3.2.1.4; Cellulase 1; AtCEL1; Endo-1,4-beta glucanase 8; Flags: Precursor (At1g70710)                                                                                                                                                                                                                                                                                                                                                                 | -2.867 |
| Cs3g15450       | K12450 UDP-glucose 4,6-dehydratase [EC:4.2.1.76]   (RefSeq) trifunctional UDP-glucose 4,6-dehydratase/UDP-4-keto-6-deoxy-D-glucose 3,5-epimerase/UDP-4-keto-L-rhamnose-reductase RHM1-like (A) | Chloroplast stem-loop binding protein of 41 kDa b, chloroplastic; CSP41-b; Heteroglycan-interacting protein 1.3; Protein CHLOROPLAST RNA BINDING; Protein Gb5f; Flags: Precursor (At1g09340)                                                                                                                                                                                                                                                                              | 2.169  |
| Cs8g13800       | K05349 beta-glucosidase [EC:3.2.1.21]   (RefSeq) beta-glucosidase BoGH3B-like (A)                                                                                                              | Beta-xylosidase/alpha-L-arabinofuranosidase 2 {ECO:0000303 PubMed:17615411, ECO:0000312 EMBL:ABQ45228.1}; Xylan 1,4-beta-xylosidase/Alpha-L-arabinofuranosidase 2; MsXyl2 {ECO:0000303 PubMed:17615411}; Includes: Beta-xylosidase; EC=3.2.1.37; 1,4-beta-D-xylan xylohydrolase {ECO:0000250 UniProtKB:P48792}; Xylan 1,4-beta-xylosidase; Includes: Alpha-L-arabinofuranosidase; Arabinosidase {ECO:0000250 UniProtKB:P48792}; EC=3.2.1.55; Flags: Precursor (At5g20950) | -2.435 |
| novel.818       | K00134 glyceraldehyde 3-phosphate dehydrogenase [EC:1.2.1.12]   (RefSeq) glyceraldehyde-3-phosphate dehydrogenase GAPC1, cytosolic (A)                                                         | Glyceraldehyde-3-phosphate dehydrogenase, cytosolic; EC=1.2.1.12; Flags: Fragment (At1g13440)                                                                                                                                                                                                                                                                                                                                                                             | -1.068 |
| orange1.1t02719 | K01051 pectinesterase [EC:3.1.1.11]   (RefSeq) pectinesterase-like (A)                                                                                                                         | Probable pectinesterase/pectinesterase inhibitor 61; Includes: Pectinesterase inhibitor 61; Pectin methylesterase inhibitor 61; Includes: Pectinesterase 61; PE 61; EC=3.1.1.11; AtPMEpcrF; Pectin methylesterase 61; AtPME61 (At5g53370)                                                                                                                                                                                                                                 | -1.518 |
| Cs8g06950       | K00162 pyruvate dehydrogenase E1 component beta subunit [EC:1.2.4.1]   (RefSeq) pyruvate dehydrogenase E1 component subunit beta-3, chloroplastic (A)                                          | Pyruvate dehydrogenase E1 component subunit beta-3, chloroplastic; EC=1.2.4.1; Flags: Precursor (At2g34590)                                                                                                                                                                                                                                                                                                                                                               | 1.832  |
| Cs5g01270       | K00161 pyruvate dehydrogenase E1 component alpha subunit [EC:1.2.4.1]   (RefSeq) pyruvate dehydrogenase E1 component subunit alpha-3, chloroplastic (A)                                        | Pyruvate dehydrogenase E1 component subunit alpha-3, chloroplastic; EC=1.2.4.1; Flags: Precursor (At1g01090)                                                                                                                                                                                                                                                                                                                                                              | 1.356  |
| Cs4g06690       | K01051 pectinesterase [EC:3.1.1.11]   (RefSeq) pectinesterase-like (A)                                                                                                                         | Probable pectinesterase/pectinesterase inhibitor 12; Includes: Pectinesterase inhibitor 12; Pectin methylesterase inhibitor 12; Includes: Pectinesterase 12; PE 12; EC=3.1.1.11; Pectin methylesterase 12; AtPME12; Flags: Precursor (At2g26440)                                                                                                                                                                                                                          | -1.799 |
| Cs4g18980       | K00850 6-phosphofructokinase 1 [EC:2.7.1.11]   (RefSeq) ATP-dependent 6-phosphofructokinase 6 (A)                                                                                              | ATP-dependent 6-phosphofructokinase 3 {ECO:0000255 HAMAP-Rule:MF_03186}; ATP-PFK 3 {ECO:0000255 HAMAP-Rule:MF_03186}; Phosphofructokinase 3 {ECO:0000255 HAMAP-Rule:MF_03186}; EC=2.7.1.11 {ECO:0000255 HAMAP-Rule:MF_03186}; Phosphohexokinase 3 {ECO:0000255 HAMAP-Rule:MF_03186} (At4g32840)                                                                                                                                                                           | -2.038 |
| Cs7g09860       | K01728 pectate lyase [EC:4.2.2.2]   (RefSeq) probable pectate lyase 5 (A)                                                                                                                      | Probable pectate lyase 5; EC=4.2.2.2; Flags: Precursor (At1g67750)                                                                                                                                                                                                                                                                                                                                                                                                        | -5.604 |

|                                                            |                                                                                                             |                                                                                                                                                                                                                                                  |        |
|------------------------------------------------------------|-------------------------------------------------------------------------------------------------------------|--------------------------------------------------------------------------------------------------------------------------------------------------------------------------------------------------------------------------------------------------|--------|
| Cs1g25000                                                  | K01051 pectinesterase [EC:3.1.1.11]   (RefSeq) probable pectinesterase 53 (A)                               | Probable pectinesterase 53; PE 53; EC=3.1.1.11; Pectin methylesterase 53; AtPME53; Flags: Precursor (At5g19730)                                                                                                                                  | 2.682  |
| Cs9g04980                                                  | K01177 beta-amylase [EC:3.2.1.2]   (RefSeq) beta-amylase 1, chloroplastic (A)                               | Inactive beta-amylase 9; 1,4-alpha-D-glucan maltohydrolase; Inactive beta-amylase 3 (At5g18670)                                                                                                                                                  | -1.405 |
| Cs1g11330                                                  | K01209 alpha-N-arabinofuranosidase [EC:3.2.1.55]   (RefSeq) alpha-L-arabinofuranosidase 1-like (A)          | Alpha-L-arabinofuranosidase 1; AtASD1; EC=3.2.1.55; Beta-D-xylosidase; EC=3.2.1.-; Flags: Precursor (At3g10740)                                                                                                                                  | 1.076  |
| Cs5g33450                                                  | K01051 pectinesterase [EC:3.1.1.11]   (RefSeq) pectinesterase-like (A)                                      | Probable pectinesterase/pectinesterase inhibitor 40; Includes: Pectinesterase inhibitor 40; Pectin methylesterase inhibitor 40; Includes: Pectinesterase 40; PE 40; EC=3.1.1.11; Pectin methylesterase 40; AtPME40; Flags: Precursor (At4g02320) | 1.122  |
| Cs7g21940                                                  | K01728 pectate lyase [EC:4.2.2.2]   (RefSeq) probable pectate lyase 13 (A)                                  | Probable pectate lyase 13; EC=4.2.2.2; Powdery mildew susceptibility protein; Powdery mildew-resistant mutant 6; Flags: Precursor (At5g04310)                                                                                                    | -1.693 |
| Cs4g06650                                                  | K01051 pectinesterase [EC:3.1.1.11]   (RefSeq) pectinesterase/pectinesterase inhibitor PPE8B-like (A)       | Pectinesterase/pectinesterase inhibitor PPE8B; Includes: Pectinesterase inhibitor PPE8B; Pectin methylesterase inhibitor PPE8B; Includes: Pectinesterase PPE8B; PE PPE8B; EC=3.1.1.11; Pectin methylesterase PPE8B; Flags: Precursor (At3g43270) | -1.117 |
| Cs3g26050                                                  | K00844 hexokinase [EC:2.7.1.1]   (RefSeq) hexokinase-2, chloroplastic (A)                                   | Hexokinase-2, chloroplastic; EC=2.7.1.1; NtHxK2; Flags: Precursor (At1g47840)                                                                                                                                                                    | 1.128  |
| Cs4g15560                                                  | K01051 pectinesterase [EC:3.1.1.11]   (RefSeq) probable pectinesterase 53 (A)                               | Probable pectinesterase 53; PE 53; EC=3.1.1.11; Pectin methylesterase 53; AtPME53; Flags: Precursor (At5g19730)                                                                                                                                  | -2.514 |
| Cs5g04040                                                  | K01051 pectinesterase [EC:3.1.1.11]   (RefSeq) probable pectinesterase/pectinesterase inhibitor 21 (A)      | Pectinesterase 3; PE 3; EC=3.1.1.11; Pectin methylesterase 3; Flags: Precursor (At3g47670)                                                                                                                                                       | -1.454 |
| novel.1980                                                 | K01214 isoamylase [EC:3.2.1.68]   (RefSeq) isoamylase 1, chloroplastic (A)                                  | Isoamylase 1, chloroplastic; AtISA1; EC=3.2.1.68; Flags: Precursor                                                                                                                                                                               | -1.739 |
| orange1.1t02681                                            | K15920 xylan 1,4-beta-xylosidase [EC:3.2.1.37]   (RefSeq) beta-xylosidase/alpha-L-arabinofuranosidase 2 (A) | Beta-D-xylosidase 4; AtBXL4; EC=3.2.1.37; Flags: Precursor (At5g64570)                                                                                                                                                                           | -1.328 |
| Cs4g06630                                                  | K01051 pectinesterase [EC:3.1.1.11]   (RefSeq) PME4; putative thermostable pectinesterase (A)               | Pectinesterase 3; PE 3; EC=3.1.1.11; Pectin methylesterase 3; Flags: Precursor (At3g14310)                                                                                                                                                       | -2.075 |
| <b>Starch and sucrose metabolism (ko00500, P = 0.0100)</b> |                                                                                                             |                                                                                                                                                                                                                                                  |        |
| Cs5g33470                                                  | K00695 sucrose synthase [EC:2.4.1.13]   (RefSeq) sucrose synthase 2 (A)                                     | Sucrose synthase 2; EC=2.4.1.13; Sucrose-UDP glucosyltransferase 2 (At4g02280)                                                                                                                                                                   | -1.719 |
| Cs6g15930                                                  | K00695 sucrose synthase [EC:2.4.1.13]   (RefSeq) sucrose synthase 5 (A)                                     | Sucrose synthase 6; AtSUS6; EC=2.4.1.13; Sucrose-UDP glucosyltransferase 6 (At1g73370)                                                                                                                                                           | -1.069 |
| Cs9g03980                                                  | K00695 sucrose synthase [EC:2.4.1.13]   (RefSeq) sucrose synthase 2-like (A)                                | Sucrose synthase 2; AtSUS2; EC=2.4.1.13; Sucrose-UDP glucosyltransferase 2 (At5g49190)                                                                                                                                                           | -1.584 |
| Cs1g15840                                                  | K00844 hexokinase [EC:2.7.1.1]   (RefSeq) hexokinase-1-like (A)                                             | Hexokinase-1; EC=2.7.1.1; NtHxK1 (At4g29130)                                                                                                                                                                                                     | -2.510 |

|           |                                                                                                                                                                    |                                                                                                                                                                                                                                    |        |
|-----------|--------------------------------------------------------------------------------------------------------------------------------------------------------------------|------------------------------------------------------------------------------------------------------------------------------------------------------------------------------------------------------------------------------------|--------|
| Cs3g26050 | K00844 hexokinase [EC:2.7.1.1]   (RefSeq) hexokinase-2, chloroplastic (A)                                                                                          | Hexokinase-2, chloroplastic; EC=2.7.1.1; NtHxK2; Flags: Precursor (At1g47840)                                                                                                                                                      | 1.128  |
| Cs6g17600 | K00847 fructokinase [EC:2.7.1.4]   (RefSeq) probable fructokinase-6, chloroplastic (A)                                                                             | Probable fructokinase-6, chloroplastic; EC=2.7.1.4; Flags: Precursor (At1g66430)                                                                                                                                                   | 2.521  |
| Cs2g18800 | K00975 glucose-1-phosphate adenylyltransferase [EC:2.7.7.27]   (RefSeq) SB1, glgC; glucose-1-phosphate adenylyltransferase small subunit 2, chloroplastic-like (A) | Glucose-1-phosphate adenylyltransferase small subunit 2, chloroplastic; EC=2.7.7.27; ADP-glucose pyrophosphorylase; ADP-glucose synthase; AGPase B; Alpha-D-glucose-1-phosphate adenylyl transferase; Flags: Precursor (At5g48300) | 1.281  |
| Cs8g07230 | K00975 glucose-1-phosphate adenylyltransferase [EC:2.7.7.27]   (RefSeq) glgC; glucose-1-phosphate adenylyltransferase large subunit 1-like (A)                     | Glucose-1-phosphate adenylyltransferase large subunit 1; EC=2.7.7.27; ADP-glucose pyrophosphorylase; ADP-glucose synthase; AGPase S; Alpha-D-glucose-1-phosphate adenylyl transferase; Flags: Fragment (At4g39210)                 | 1.598  |
| Cs3g26820 | K01176 alpha-amylase [EC:3.2.1.1]   (RefSeq) probable alpha-amylase 2 (A)                                                                                          | Probable alpha-amylase 2; AtAMY2; EC=3.2.1.1 {ECO:0000250 UniProtKB:P00693}; 1,4-alpha-D-glucan glucanohydrolase (At1g76130)                                                                                                       | 1.291  |
| Cs2g22040 | K01177 beta-amylase [EC:3.2.1.2]   (RefSeq) beta-amylase (A)                                                                                                       | Beta-amylase; EC=3.2.1.2; 1,4-alpha-D-glucan maltohydrolase (At4g15210)                                                                                                                                                            | -1.868 |
| Cs9g04980 | K01177 beta-amylase [EC:3.2.1.2]   (RefSeq) beta-amylase 1, chloroplastic (A)                                                                                      | Inactive beta-amylase 9; 1,4-alpha-D-glucan maltohydrolase; Inactive beta-amylase 3 (At5g18670)                                                                                                                                    | -1.405 |
| Cs1g02720 | K01179 endoglucanase [EC:3.2.1.4]   (RefSeq) endoglucanase 12-like (A)                                                                                             | Endoglucanase 12; EC=3.2.1.4; Endo-1,4-beta glucanase 12; Flags: Precursor (At2g44540)                                                                                                                                             | 1.774  |
| Cs1g21260 | K01179 endoglucanase [EC:3.2.1.4]   (RefSeq) endoglucanase 2-like (A)                                                                                              | Endoglucanase 24; EC=3.2.1.4; Endo-1,4-beta glucanase 24; Flags: Precursor (At1g19940)                                                                                                                                             | 6.669  |
| Cs2g17090 | K01179 endoglucanase [EC:3.2.1.4]   (RefSeq) endoglucanase 8-like (A)                                                                                              | Endoglucanase 8; EC=3.2.1.4; Cellulase 1; AtCEL1; Endo-1,4-beta glucanase 8; Flags: Precursor (At1g70710)                                                                                                                          | -2.867 |
| Cs3g21000 | K01179 endoglucanase [EC:3.2.1.4]   (RefSeq) endoglucanase 12 (A)                                                                                                  | Endoglucanase 9; EC=3.2.1.4; Endo-1,4-beta glucanase 9; OsCel9D; OsGLU1 (At5g49720)                                                                                                                                                | 9.252  |
| Cs3g25940 | K01179 endoglucanase [EC:3.2.1.4]   (RefSeq) endoglucanase 2-like (A)                                                                                              | Endoglucanase 10; EC=3.2.1.4; Endo-1,4-beta glucanase 10; Flags: Precursor (At1g75680)                                                                                                                                             | -2.240 |
| Cs5g02320 | K01179 endoglucanase [EC:3.2.1.4]   (RefSeq) endoglucanase 6 (A)                                                                                                   | Endoglucanase 6; EC=3.2.1.4; Endo-1,4-beta glucanase 6; Flags: Precursor (At1g64390)                                                                                                                                               | -2.542 |
| novel.171 | K01179 endoglucanase [EC:3.2.1.4]   (RefSeq) basic cellulase (A)                                                                                                   | Endoglucanase 9; EC=3.2.1.4; Cellulase 3; AtCEL3; Endo-1,4-beta glucanase 9; Flags: Precursor (At1g71380)                                                                                                                          | 2.923  |
| Cs2g10900 | K01187 alpha-glucosidase [EC:3.2.1.20]   (RefSeq) alpha-glucosidase-like (A)                                                                                       | Alpha-glucosidase; EC=3.2.1.20; Maltase; Flags: Precursor (At5g11720)                                                                                                                                                              | 2.803  |
| Cs5g07030 | K01188 beta-glucosidase [EC:3.2.1.21]   (RefSeq) beta-glucosidase 24-like (A)                                                                                      | Beta-glucosidase 24; Os6bglu24; EC=3.2.1.21; Flags: Precursor (At5g44640)                                                                                                                                                          | 7.377  |
| Cs5g07040 | K01188 beta-glucosidase [EC:3.2.1.21]   (RefSeq) vicianin hydrolase-like (A)                                                                                       | Furostanol glycoside 26-O-beta-glucosidase {ECO:0000303 PubMed:8766714}; CsF26G                                                                                                                                                    | 7.202  |

|            |                                                                                                                                         |                                                                                                                                                                                                                                                                                                                                                                                                                                                                                                |        |
|------------|-----------------------------------------------------------------------------------------------------------------------------------------|------------------------------------------------------------------------------------------------------------------------------------------------------------------------------------------------------------------------------------------------------------------------------------------------------------------------------------------------------------------------------------------------------------------------------------------------------------------------------------------------|--------|
|            |                                                                                                                                         | {ECO:0000303 PubMed:8766714}; EC=3.2.1.186<br>{ECO:0000269 PubMed:8549824, ECO:0000269 PubMed:8766714};<br>Protodioscin 26-O-beta-D-glucosidase; Flags: Precursor (At5g54570)                                                                                                                                                                                                                                                                                                                  |        |
| Cs7g01360  | K01188 beta-glucosidase [EC:3.2.1.21]   (RefSeq) beta-glucosidase 12-like (A)                                                           | Beta-glucosidase 12 {ECO:0000305}; EC=3.2.1.21 {ECO:0000305}; Flags: Precursor (At5g44640)                                                                                                                                                                                                                                                                                                                                                                                                     | -1.151 |
| Cs8g03370  | K01188 beta-glucosidase [EC:3.2.1.21]   (RefSeq) beta-glucosidase 11-like (A)                                                           | Beta-glucosidase 11; AtBGLU11; EC=3.2.1.21; Flags: Precursor (At1g02850)                                                                                                                                                                                                                                                                                                                                                                                                                       | 2.141  |
| Cs4g18340  | K01193 beta-fructofuranosidase [EC:3.2.1.26]   (RefSeq) beta-fructofuranosidase, insoluble isoenzyme CWINV1 (A)                         | Beta-fructofuranosidase, insoluble isoenzyme CWINV1; EC=3.2.1.26; Cell wall beta-fructosidase 1; AtbetaFRUCT1; Cell wall invertase 1; AtcwINV1; Sucrose hydrolase 1; Flags: Precursor (At3g13790)                                                                                                                                                                                                                                                                                              | -3.210 |
| Cs5g01775  | K01194 alpha,alpha-trehalase [EC:3.2.1.28]   (RefSeq) probable trehalase (A)                                                            | Trehalase; EC=3.2.1.28; Alpha,alpha-trehalase; Alpha,alpha-trehalose glucohydrolase; Trehalase 1; AtTRE1 (At4g24040)                                                                                                                                                                                                                                                                                                                                                                           | 2.169  |
| Cs5g01790  | K01194 alpha,alpha-trehalase [EC:3.2.1.28]   (RefSeq) probable trehalase (A)                                                            | Trehalase; EC=3.2.1.28; Alpha,alpha-trehalase; Alpha,alpha-trehalose glucohydrolase; Trehalase 1; AtTRE1 (At4g24040)                                                                                                                                                                                                                                                                                                                                                                           | 3.201  |
| Cs7g22230  | K01194 alpha,alpha-trehalase [EC:3.2.1.28]   (RefSeq) probable trehalase (A)                                                            | Trehalase; EC=3.2.1.28; Alpha,alpha-trehalase; Alpha,alpha-trehalose glucohydrolase; Trehalase 1; AtTRE1 (At4g24040)                                                                                                                                                                                                                                                                                                                                                                           | 3.256  |
| novel.1980 | K01214 isoamylase [EC:3.2.1.68]   (RefSeq) isoamylase 1, chloroplastic (A)                                                              | Isoamylase 1, chloroplastic; AtISA1; EC=3.2.1.68; Flags: Precursor                                                                                                                                                                                                                                                                                                                                                                                                                             | -1.739 |
| Cs3g03130  | K01513 ectonucleotide pyrophosphatase/phosphodiesterase family member 1/3 [EC:3.1.4.1 3.6.1.9]   (RefSeq) venom phosphodiesterase 2 (A) | (At4g29680)                                                                                                                                                                                                                                                                                                                                                                                                                                                                                    | 2.146  |
| Cs7g23860  | K05349 beta-glucosidase [EC:3.2.1.21]   (RefSeq) beta-glucosidase BoGH3B-like (A)                                                       | Beta-xylosidase/alpha-L-arabinofuranosidase 2<br>{ECO:0000303 PubMed:17615411, ECO:0000312 EMBL:ABQ45228.1};<br>Xylan 1,4-beta-xylosidase/Alpha-L-arabinofuranosidase 2; MsXyl2<br>{ECO:0000303 PubMed:17615411}; Includes: Beta-xylosidase; EC=3.2.1.37;<br>1,4-beta-D-xylan xylohydrolase {ECO:0000250 UniProtKB:P48792}; Xylan<br>1,4-beta-xylosidase; Includes: Alpha-L-arabinofuranosidase; Arabinosidase<br>{ECO:0000250 UniProtKB:P48792}; EC=3.2.1.55; Flags: Precursor<br>(At5g20950) | -1.339 |
| Cs8g13800  | K05349 beta-glucosidase [EC:3.2.1.21]   (RefSeq) beta-glucosidase BoGH3B-like (A)                                                       | Beta-xylosidase/alpha-L-arabinofuranosidase 2<br>{ECO:0000303 PubMed:17615411, ECO:0000312 EMBL:ABQ45228.1};<br>Xylan 1,4-beta-xylosidase/Alpha-L-arabinofuranosidase 2; MsXyl2<br>{ECO:0000303 PubMed:17615411}; Includes: Beta-xylosidase; EC=3.2.1.37;<br>1,4-beta-D-xylan xylohydrolase {ECO:0000250 UniProtKB:P48792}; Xylan<br>1,4-beta-xylosidase; Includes: Alpha-L-arabinofuranosidase; Arabinosidase<br>{ECO:0000250 UniProtKB:P48792}; EC=3.2.1.55; Flags: Precursor<br>(At5g20950) | -2.435 |
| Cs8g19870  | K05349 beta-glucosidase [EC:3.2.1.21]   (RefSeq) beta-glucosidase BoGH3B-like (A)                                                       | Beta-D-xylosidase 1; AtBXL1; EC=3.2.1.-; Alpha-L-arabinofuranosidase;<br>EC=3.2.1.55; Flags: Precursor (At3g47000)                                                                                                                                                                                                                                                                                                                                                                             | 1.672  |

|                 |                                                                                                                                                           |                                                                                                                                                                                                 |        |
|-----------------|-----------------------------------------------------------------------------------------------------------------------------------------------------------|-------------------------------------------------------------------------------------------------------------------------------------------------------------------------------------------------|--------|
| orange1.1t00039 | K05350 beta-glucosidase [EC:3.2.1.21]   (RefSeq) beta-glucosidase 44-like (A)                                                                             | Beta-glucosidase 44; AtBGLU44; EC=3.2.1.21; Flags: Precursor (At3g18080)                                                                                                                        | -1.481 |
| orange1.1t00566 | K13679 granule-bound starch synthase [EC:2.4.1.242]   (RefSeq) GBSSII-2, SB2; granule-bound starch synthase 1, chloroplastic/amyloplastic (A)             | Granule-bound starch synthase 1, chloroplastic/amyloplastic; EC=2.4.1.242; Granule-bound starch synthase I; GBSS-I; Flags: Precursor (At1g32900)                                                | 1.659  |
| Cs5g05200       | K16055 trehalose 6-phosphate synthase/phosphatase [EC:2.4.1.15 3.1.3.12]   (RefSeq) probable alpha,alpha-trehalose-phosphate synthase [UDP-forming] 9 (A) | Probable alpha,alpha-trehalose-phosphate synthase [UDP-forming] 9; EC=2.4.1.15; Trehalose-6-phosphate synthase 9; AtTPS9 (At1g23870)                                                            | -2.183 |
| Cs7g08390       | K16055 trehalose 6-phosphate synthase/phosphatase [EC:2.4.1.15 3.1.3.12]   (RefSeq) probable alpha,alpha-trehalose-phosphate synthase [UDP-forming] 9 (A) | Probable alpha,alpha-trehalose-phosphate synthase [UDP-forming] 9; EC=2.4.1.15; Trehalose-6-phosphate synthase 9; AtTPS9 (At1g23870)                                                            | -2.070 |
| Cs2g03760       | K19891 glucan endo-1,3-beta-glucosidase 1/2/3 [EC:3.2.1.39]   (RefSeq) glucan endo-1,3-beta-glucosidase 1 (A)                                             | Glucan endo-1,3-beta-D-glucosidase; EC=3.2.1.39; Major pollen allergen Ole e 9; AltName: Allergen=Ole e 9; Flags: Precursor (At1g78520)                                                         | 2.906  |
| Cs2g03950       | K19891 glucan endo-1,3-beta-glucosidase 1/2/3 [EC:3.2.1.39]   (RefSeq) glucan endo-1,3-beta-glucosidase 1 (A)                                             | Glucan endo-1,3-beta-glucosidase 1; EC=3.2.1.39; (1->3)-beta-glucan endohydrolase 1; (1->3)-beta-glucanase 1; Beta-1,3-endoglucanase 1; Beta-1,3-glucanase 1; Flags: Precursor (At1g29380)      | 1.320  |
| Cs2g09510       | K19891 glucan endo-1,3-beta-glucosidase 1/2/3 [EC:3.2.1.39]   (RefSeq) glucan endo-1,3-beta-glucosidase 2 (A)                                             | Glucan endo-1,3-beta-glucosidase 13; EC=3.2.1.39; (1->3)-beta-glucan endohydrolase 13; (1->3)-beta-glucanase 13; Beta-1,3-endoglucanase 13; Beta-1,3-glucanase 13; Flags: Precursor (At4g05430) | 4.473  |
| Cs2g15850       | K19891 glucan endo-1,3-beta-glucosidase 1/2/3 [EC:3.2.1.39]   (RefSeq) glucan endo-1,3-beta-glucosidase 1 (A)                                             | PLASMODESMATA CALLOSE-BINDING PROTEIN 5; AtPDCB5; Glucan endo-1,3-beta-glucosidase-like protein 1; Flags: Precursor (At3g58100)                                                                 | -1.254 |
| Cs2g19770       | K19891 glucan endo-1,3-beta-glucosidase 1/2/3 [EC:3.2.1.39]   (RefSeq) glucan endo-1,3-beta-glucosidase 1 (A)                                             | Glucan endo-1,3-beta-glucosidase 1; EC=3.2.1.39; (1->3)-beta-glucan endohydrolase 1; (1->3)-beta-glucanase 1; Beta-1,3-endoglucanase 1; Beta-1,3-glucanase 1; Flags: Precursor (At5g35740)      | -2.935 |
| Cs2g20640       | K19891 glucan endo-1,3-beta-glucosidase 1/2/3 [EC:3.2.1.39]   (RefSeq) glucan endo-1,3-beta-glucosidase 3 (A)                                             | Glucan endo-1,3-beta-glucosidase 3; EC=3.2.1.39; (1->3)-beta-glucan endohydrolase 3; (1->3)-beta-glucanase 3; Beta-1,3-endoglucanase 3; Beta-1,3-glucanase 3; Flags: Precursor (At2g05790)      | -1.469 |
| Cs3g27500       | K19891 glucan endo-1,3-beta-glucosidase 1/2/3 [EC:3.2.1.39]   (RefSeq) glucan endo-1,3-beta-glucosidase 3 (A)                                             | Glucan endo-1,3-beta-glucosidase 12; EC=3.2.1.39; (1->3)-beta-glucan endohydrolase 12; (1->3)-beta-glucanase 12; Beta-1,3-endoglucanase 12; Beta-1,3-glucanase 12; Flags: Precursor (At4g29360) | -1.508 |
| Cs5g11770       | K19891 glucan endo-1,3-beta-glucosidase 1/2/3 [EC:3.2.1.39]   (RefSeq) glucan endo-1,3-beta-glucosidase 1 (A)                                             | PLASMODESMATA CALLOSE-BINDING PROTEIN 3; AtPDCB3; Flags: Precursor (At1g18650)                                                                                                                  | -1.668 |
| Cs6g02180       | K19891 glucan endo-1,3-beta-glucosidase 1/2/3 [EC:3.2.1.39]   (RefSeq) glucan endo-1,3-beta-glucosidase 1 (A)                                             | Glucan endo-1,3-beta-glucosidase 1; EC=3.2.1.39; (1->3)-beta-glucan endohydrolase 1; (1->3)-beta-glucanase 1; Beta-1,3-endoglucanase 1; Beta-1,3-glucanase 1; Flags: Precursor (At1g09460)      | -1.652 |
| Cs7g08720       | K19891 glucan endo-1,3-beta-glucosidase 1/2/3 [EC:3.2.1.39]   (RefSeq) glucan endo-1,3-beta-glucosidase 3 (A)                                             | Probable glucan endo-1,3-beta-glucosidase At4g16260 {ECO:0000305}; EC=3.2.1.39 {ECO:0000305}; Flags: Precursor (At2g05790)                                                                      | -3.800 |

|                                                              |                                                                                                                  |                                                                                                                                                                                                                                                                                                 |        |
|--------------------------------------------------------------|------------------------------------------------------------------------------------------------------------------|-------------------------------------------------------------------------------------------------------------------------------------------------------------------------------------------------------------------------------------------------------------------------------------------------|--------|
| Cs8g14950                                                    | K19891 glucan endo-1,3-beta-glucosidase 1/2/3 [EC:3.2.1.39]   (RefSeq) glucan endo-1,3-beta-glucosidase 1 (A)    | Glucan endo-1,3-beta-glucosidase 14; EC=3.2.1.39; (1->3)-beta-glucan endohydrolase 14; (1->3)-beta-glucanase 14; Beta-1,3-endoglucanase 14; Beta-1,3-glucanase 14; Flags: Precursor (At2g27500)                                                                                                 | 1.232  |
| orange1.1t00643                                              | K19891 glucan endo-1,3-beta-glucosidase 1/2/3 [EC:3.2.1.39]   (RefSeq) glucan endo-1,3-beta-glucosidase 3 (A)    | Glucan endo-1,3-beta-glucosidase, basic isoform; EC=3.2.1.39; (1->3)-beta-glucan endohydrolase; (1->3)-beta-glucanase; Beta-1,3-endoglucanase; PpGns1; Flags: Precursor (At3g57270)                                                                                                             | -1.816 |
| orange1.1t00647                                              | K19891 glucan endo-1,3-beta-glucosidase 1/2/3 [EC:3.2.1.39]   (RefSeq) glucan endo-1,3-beta-glucosidase 3 (A)    | Glucan endo-1,3-beta-glucosidase; EC=3.2.1.39; (1->3)-beta-glucan endohydrolase; (1->3)-beta-glucanase; Beta-1,3-endoglucanase; Flags: Precursor (At3g57270)                                                                                                                                    | -1.642 |
| Cs1g21760                                                    | K19892 glucan endo-1,3-beta-glucosidase 4 [EC:3.2.1.39]   (RefSeq) glucan endo-1,3-beta-glucosidase 4 (A)        | Glucan endo-1,3-beta-glucosidase 1; EC=3.2.1.39; (1->3)-beta-glucan endohydrolase 1; (1->3)-beta-glucanase 1; Beta-1,3-endoglucanase 1; Beta-1,3-glucanase 1; Flags: Precursor (At5g67460)                                                                                                      | -1.706 |
| orange1.1t03276                                              | K19892 glucan endo-1,3-beta-glucosidase 4 [EC:3.2.1.39]   (RefSeq) glucan endo-1,3-beta-glucosidase 4 (A)        | PLASMODESMATA CALLOSE-BINDING PROTEIN 1; AtPDCB1; Glucan endo-1,3-beta-glucosidase-like protein 2; Flags: Precursor (At1g79480)                                                                                                                                                                 | -1.600 |
| Cs1g04110                                                    | K19893 glucan endo-1,3-beta-glucosidase 5/6 [EC:3.2.1.39]   (RefSeq) glucan endo-1,3-beta-glucosidase 5 (A)      | Glucan endo-1,3-beta-glucosidase 8; EC=3.2.1.39; (1->3)-beta-glucan endohydrolase 8; (1->3)-beta-glucanase 8; Beta-1,3-endoglucanase 8; Beta-1,3-glucanase 8; Flags: Precursor (At5g64790)                                                                                                      | 9.328  |
| Cs2g01360                                                    | K19893 glucan endo-1,3-beta-glucosidase 5/6 [EC:3.2.1.39]   (RefSeq) glucan endo-1,3-beta-glucosidase 6 (A)      | Glucan endo-1,3-beta-glucosidase 5; EC=3.2.1.39; (1->3)-beta-glucan endohydrolase 5; (1->3)-beta-glucanase 5; Beta-1,3-endoglucanase 5; Beta-1,3-glucanase 5; Flags: Precursor (At4g17180)                                                                                                      | -1.981 |
| Cs4g04890                                                    | K19893 glucan endo-1,3-beta-glucosidase 5/6 [EC:3.2.1.39]   (RefSeq) glucan endo-1,3-beta-glucosidase 6 (A)      | Glucan endo-1,3-beta-glucosidase 6; EC=3.2.1.39; (1->3)-beta-glucan endohydrolase 6; (1->3)-beta-glucanase 6; Beta-1,3-endoglucanase 6; Beta-1,3-glucanase 6; Flags: Precursor (At5g58090)                                                                                                      | -1.328 |
| <b>Fructose and mannose metabolism (ko00051, P = 0.6502)</b> |                                                                                                                  |                                                                                                                                                                                                                                                                                                 |        |
| Cs1g15840                                                    | K00844 hexokinase [EC:2.7.1.1]   (RefSeq) hexokinase-1-like (A)                                                  | Hexokinase-1; EC=2.7.1.1; NtHxK1 (At4g29130)                                                                                                                                                                                                                                                    | -2.510 |
| Cs3g26050                                                    | K00844 hexokinase [EC:2.7.1.1]   (RefSeq) hexokinase-2, chloroplastic (A)                                        | Hexokinase-2, chloroplastic; EC=2.7.1.1; NtHxK2; Flags: Precursor (At1g47840)                                                                                                                                                                                                                   | 1.128  |
| Cs6g17600                                                    | K00847 fructokinase [EC:2.7.1.4]   (RefSeq) probable fructokinase-6, chloroplastic (A)                           | Probable fructokinase-6, chloroplastic; EC=2.7.1.4; Flags: Precursor (At1g66430)                                                                                                                                                                                                                | 2.521  |
| Cs1g15970                                                    | K00850 6-phosphofructokinase 1 [EC:2.7.1.11]   (RefSeq) ATP-dependent 6-phosphofructokinase 3-like (A)           | ATP-dependent 6-phosphofructokinase 3 {ECO:0000255 HAMAP-Rule:MF_03186}; ATP-PFK 3 {ECO:0000255 HAMAP-Rule:MF_03186}; Phosphofructokinase 3 {ECO:0000255 HAMAP-Rule:MF_03186}; EC=2.7.1.11 {ECO:0000255 HAMAP-Rule:MF_03186}; Phosphohexokinase 3 {ECO:0000255 HAMAP-Rule:MF_03186} (At4g29220) | 1.165  |
| Cs1g20200                                                    | K00850 6-phosphofructokinase 1 [EC:2.7.1.11]   (RefSeq) ATP-dependent 6-phosphofructokinase 5, chloroplastic (A) | ATP-dependent 6-phosphofructokinase 5, chloroplastic {ECO:0000255 HAMAP-Rule:MF_03186}; ATP-PFK 5                                                                                                                                                                                               | 1.593  |

|                                                          |                                                                                                                                |                                                                                                                                                                                                                                                                                                                                  |        |
|----------------------------------------------------------|--------------------------------------------------------------------------------------------------------------------------------|----------------------------------------------------------------------------------------------------------------------------------------------------------------------------------------------------------------------------------------------------------------------------------------------------------------------------------|--------|
|                                                          |                                                                                                                                | {ECO:0000255 HAMAP-Rule:MF_03186}; Phosphofructokinase 5<br>{ECO:0000255 HAMAP-Rule:MF_03186}; EC=2.7.1.11<br>{ECO:0000255 HAMAP-Rule:MF_03186}; Phosphohexokinase 5<br>{ECO:0000255 HAMAP-Rule:MF_03186}; Flags: Precursor (At2g22480)                                                                                          |        |
| Cs4g18980                                                | K00850 6-phosphofructokinase 1 [EC:2.7.1.11]   (RefSeq) ATP-dependent 6-phosphofructokinase 6 (A)                              | ATP-dependent 6-phosphofructokinase 3 {ECO:0000255 HAMAP-Rule:MF_03186}; ATP-PFK 3 {ECO:0000255 HAMAP-Rule:MF_03186}; Phosphofructokinase 3 {ECO:0000255 HAMAP-Rule:MF_03186}; EC=2.7.1.11 {ECO:0000255 HAMAP-Rule:MF_03186}; Phosphohexokinase 3 {ECO:0000255 HAMAP-Rule:MF_03186} (At4g32840)                                  | -2.038 |
| novel.1497                                               | K00966 mannose-1-phosphate guanylyltransferase [EC:2.7.7.13]   (RefSeq) probable mannose-1-phosphate guanylyltransferase 3 (A) | Probable mannose-1-phosphate guanylyltransferase 2; EC=2.7.7.13 (At3g55590)                                                                                                                                                                                                                                                      | 3.429  |
| Cs7g32500                                                | K01803 triosephosphate isomerase (TIM) [EC:5.3.1.1]   (RefSeq) triosephosphate isomerase, cytosolic (A)                        | Triosephosphate isomerase, cytosolic; TIM; Triose-phosphate isomerase; EC=5.3.1.1 (At3g55440)                                                                                                                                                                                                                                    | -1.019 |
| Cs2g12720                                                | K01809 mannose-6-phosphate isomerase [EC:5.3.1.8]   (RefSeq) mannose-6-phosphate isomerase 1-like (A)                          | Mannose-6-phosphate isomerase 1; EC=5.3.1.8; Phosphohexomutase 1; Phosphomannose isomerase 1; PMI1; Protein MATERNAL EFFECT EMBRYO ARREST 31 (At3g02570)                                                                                                                                                                         | -3.224 |
| <b><i>Galactose metabolism (ko00052, P = 0.0006)</i></b> |                                                                                                                                |                                                                                                                                                                                                                                                                                                                                  |        |
| Cs1g15840                                                | K00844 hexokinase [EC:2.7.1.1]   (RefSeq) hexokinase-1-like (A)                                                                | Hexokinase-1; EC=2.7.1.1; NtHxK1 (At4g29130)                                                                                                                                                                                                                                                                                     | -2.510 |
| Cs3g26050                                                | K00844 hexokinase [EC:2.7.1.1]   (RefSeq) hexokinase-2, chloroplastic (A)                                                      | Hexokinase-2, chloroplastic; EC=2.7.1.1; NtHxK2; Flags: Precursor (At1g47840)                                                                                                                                                                                                                                                    | 1.128  |
| Cs1g15970                                                | K00850 6-phosphofructokinase 1 [EC:2.7.1.11]   (RefSeq) ATP-dependent 6-phosphofructokinase 3-like (A)                         | ATP-dependent 6-phosphofructokinase 3 {ECO:0000255 HAMAP-Rule:MF_03186}; ATP-PFK 3 {ECO:0000255 HAMAP-Rule:MF_03186}; Phosphofructokinase 3 {ECO:0000255 HAMAP-Rule:MF_03186}; EC=2.7.1.11 {ECO:0000255 HAMAP-Rule:MF_03186}; Phosphohexokinase 3 {ECO:0000255 HAMAP-Rule:MF_03186} (At4g29220)                                  | 1.165  |
| Cs1g20200                                                | K00850 6-phosphofructokinase 1 [EC:2.7.1.11]   (RefSeq) ATP-dependent 6-phosphofructokinase 5, chloroplastic (A)               | ATP-dependent 6-phosphofructokinase 5, chloroplastic {ECO:0000255 HAMAP-Rule:MF_03186}; ATP-PFK 5 {ECO:0000255 HAMAP-Rule:MF_03186}; Phosphofructokinase 5 {ECO:0000255 HAMAP-Rule:MF_03186}; EC=2.7.1.11 {ECO:0000255 HAMAP-Rule:MF_03186}; Phosphohexokinase 5 {ECO:0000255 HAMAP-Rule:MF_03186}; Flags: Precursor (At2g22480) | 1.593  |
| Cs4g18980                                                | K00850 6-phosphofructokinase 1 [EC:2.7.1.11]   (RefSeq) ATP-dependent 6-phosphofructokinase 6 (A)                              | ATP-dependent 6-phosphofructokinase 3 {ECO:0000255 HAMAP-Rule:MF_03186}; ATP-PFK 3 {ECO:0000255 HAMAP-Rule:MF_03186}; Phosphofructokinase 3 {ECO:0000255 HAMAP-Rule:MF_03186}; EC=2.7.1.11 {ECO:0000255 HAMAP-Rule:MF_03186}; Phosphohexokinase 3 {ECO:0000255 HAMAP-Rule:MF_03186} (At4g32840)                                  | -2.038 |

|                 |                                                                                                                                   |                                                                                                                                                                                                                                                       |        |
|-----------------|-----------------------------------------------------------------------------------------------------------------------------------|-------------------------------------------------------------------------------------------------------------------------------------------------------------------------------------------------------------------------------------------------------|--------|
| Cs2g10900       | K01187 alpha-glucosidase [EC:3.2.1.20]   (RefSeq) alpha-glucosidase-like (A)                                                      | Alpha-glucosidase; EC=3.2.1.20; Maltase; Flags: Precursor (At5g11720)                                                                                                                                                                                 | 2.803  |
| Cs4g18340       | K01193 beta-fructofuranosidase [EC:3.2.1.26]   (RefSeq) beta-fructofuranosidase, insoluble isoenzyme CWINV1 (A)                   | Beta-fructofuranosidase, insoluble isoenzyme CWINV1; EC=3.2.1.26; Cell wall beta-fructosidase 1; AtbetaFRUCT1; Cell wall invertase 1; AtcwINV1; Sucrose hydrolase 1; Flags: Precursor (At3g13790)                                                     | -3.210 |
| Cs5g10530       | K01784 UDP-glucose 4-epimerase [EC:5.1.3.2]   (RefSeq) bifunctional UDP-glucose 4-epimerase and UDP-xylose 4-epimerase 1-like (A) | Bifunctional UDP-glucose 4-epimerase and UDP-xylose 4-epimerase 1; EC=5.1.3.2; EC=5.1.3.5; UDP-D-xylose 4-epimerase; UDP-L-arabinose 4-epimerase; UDP-galactose 4-epimerase 1; UDP-glucose 4-epimerase 1; AtUGE1 (At1g12780)                          | -2.571 |
| orange1.1t01956 | K01784 UDP-glucose 4-epimerase [EC:5.1.3.2]   (RefSeq) UDP-glucose 4-epimerase GEPI48-like (A)                                    | UDP-glucose 4-epimerase GEPI48; EC=5.1.3.2; Galactowaldenase; UDP-galactose 4-epimerase (At4g10960)                                                                                                                                                   | -1.260 |
| Cs2g27610       | K06617 raffinose synthase [EC:2.4.1.82]   (RefSeq) probable galactinol--sucrose galactosyltransferase 5 (A)                       | Probable galactinol--sucrose galactosyltransferase 5; EC=2.4.1.82; Protein SEED IMBIBITION 1-LIKE; Raffinose synthase 5 (At5g40390)                                                                                                                   | -2.014 |
| Cs4g07840       | K06617 raffinose synthase [EC:2.4.1.82]   (RefSeq) probable galactinol--sucrose galactosyltransferase 1 (A)                       | Probable galactinol--sucrose galactosyltransferase 1; EC=2.4.1.82; Protein SEED IMBIBITION 1; Raffinose synthase 1 (At1g55740)                                                                                                                        | -1.092 |
| Cs5g05900       | K06617 raffinose synthase [EC:2.4.1.82]   (RefSeq) galactinol--sucrose galactosyltransferase-like (A)                             | Galactinol--sucrose galactosyltransferase; EC=2.4.1.82; Raffinose synthase (At5g40390)                                                                                                                                                                | 1.953  |
| Cs5g06440       | K06617 raffinose synthase [EC:2.4.1.82]   (RefSeq) probable galactinol--sucrose galactosyltransferase 2 (A)                       | Probable galactinol--sucrose galactosyltransferase 2; EC=2.4.1.82; Protein SEED IMBIBITION 2; Raffinose synthase 2 (At3g57520)                                                                                                                        | -2.473 |
| Cs9g12460       | K06617 raffinose synthase [EC:2.4.1.82]   (RefSeq) probable galactinol--sucrose galactosyltransferase 2 (A)                       | Probable galactinol--sucrose galactosyltransferase 2; EC=2.4.1.82; Protein SEED IMBIBITION 2; Raffinose synthase 2 (At3g57520)                                                                                                                        | 1.523  |
| Cs2g12290       | K07407 alpha-galactosidase [EC:3.2.1.22]   (RefSeq) alpha-galactosidase 1-like (A)                                                | Alpha-galactosidase 1 {ECO:0000303 PubMed:15034167}; AtAGAL1 {ECO:0000303 PubMed:15034167}; EC=3.2.1.22 {ECO:0000250 UniProtKB:Q9FXT4}; Alpha-D-galactoside galactohydrolase 1 {ECO:0000305}; Melibiase 1 {ECO:0000305}; Flags: Precursor (At5g08380) | -2.322 |
| Cs5g17230       | K07407 alpha-galactosidase [EC:3.2.1.22]   (RefSeq) alpha-galactosidase-like (A)                                                  | Alpha-galactosidase; EC=3.2.1.22; Alpha-D-galactoside galactohydrolase; Melibiase; Flags: Precursor (At5g08380)                                                                                                                                       | 3.151  |
| Cs1g08380       | K12309 beta-galactosidase [EC:3.2.1.23]   (RefSeq) beta-galactosidase 17 (A)                                                      | Beta-galactosidase 10; Lactase 10; EC=3.2.1.23; Flags: Precursor (At5g63810)                                                                                                                                                                          | -1.013 |
| Cs1g18300       | K12309 beta-galactosidase [EC:3.2.1.23]   (RefSeq) beta-galactosidase 17 (A)                                                      | Beta-galactosidase 1; Lactase 1; EC=3.2.1.23; Flags: Precursor (At3g13750)                                                                                                                                                                            | -1.750 |
| Cs1g24730       | K12309 beta-galactosidase [EC:3.2.1.23]   (RefSeq) beta-galactosidase 17 (A)                                                      | Beta-galactosidase 3; Lactase 3; EC=3.2.1.23; Flags: Precursor (At4g36360)                                                                                                                                                                            | -1.955 |
| Cs2g06700       | K12309 beta-galactosidase [EC:3.2.1.23]   (RefSeq) beta-galactosidase 17 (A)                                                      | Beta-galactosidase 8; Lactase 8; EC=3.2.1.23; Protein AR782; Flags: Precursor (At2g28470)                                                                                                                                                             | 5.343  |
| Cs3g25410       | K12309 beta-galactosidase [EC:3.2.1.23]   (RefSeq) beta-galactosidase 17 (A)                                                      | Beta-galactosidase 5; Lactase 5; EC=3.2.1.23; Flags: Precursor (At4g36360)                                                                                                                                                                            | -2.795 |
| Cs4g14090       | K12309 beta-galactosidase [EC:3.2.1.23]   (RefSeq) beta-galactosidase 17 (A)                                                      | Beta-galactosidase; EC=3.2.1.23; Acid beta-galactosidase; Lactase; Exo-(1->4)-beta-D-galactanase; Flags: Precursor (At4g26140)                                                                                                                        | -1.397 |
| Cs5g17540       | K12309 beta-galactosidase [EC:3.2.1.23]   (RefSeq) beta-galactosidase 17 (A)                                                      | Beta-galactosidase 16; Lactase 16; EC=3.2.1.23; Flags: Precursor (At1g77410)                                                                                                                                                                          | 5.369  |

|                                                             |                                                                                                                                                            |                                                                                                                                                                                                                                     |        |
|-------------------------------------------------------------|------------------------------------------------------------------------------------------------------------------------------------------------------------|-------------------------------------------------------------------------------------------------------------------------------------------------------------------------------------------------------------------------------------|--------|
| Cs8g16800                                                   | K12309 beta-galactosidase [EC:3.2.1.23]   (RefSeq) beta-galactosidase 17 (A)                                                                               | Beta-galactosidase 8; Lactase 8; EC=3.2.1.23; Protein AR782; Flags: Precursor (At2g28470)                                                                                                                                           | -1.961 |
| Cs7g30780                                                   | K12447 UDP-sugar pyrophosphorylase [EC:2.7.7.64]   (RefSeq) UDP-sugar pyrophosphorylase (A)                                                                | UTP--glucose-1-phosphate uridylyltransferase 3, chloroplastic {ECO:0000305}; EC=2.7.7.9 {ECO:0000269 PubMed:19286968}; UDP-glucose pyrophosphorylase 3 {ECO:0000303 PubMed:19286968}; Flags: Precursor (At3g56040)                  | 2.313  |
| Cs3g15460                                                   | K18819 inositol 3-alpha-galactosyltransferase [EC:2.4.1.123]   (RefSeq) galactinol synthase 2-like (A)                                                     | Galactinol synthase 2; GolS-2; SlGolS2; EC=2.4.1.123 (At1g56600)                                                                                                                                                                    | -1.594 |
| <b>Hexose biosynthetic process (GO:0019319; P = 0.5086)</b> |                                                                                                                                                            |                                                                                                                                                                                                                                     |        |
| Cs1g20920                                                   | K01610 phosphoenolpyruvate carboxykinase (ATP) [EC:4.1.1.49]   (RefSeq) phosphoenolpyruvate carboxykinase [ATP]-like (A)                                   | Phosphoenolpyruvate carboxykinase (ATP); PEP carboxykinase; PEPCK; EC=4.1.1.49 (At4g37870)                                                                                                                                          | -1.471 |
| Cs7g31640                                                   | K01100 sedoheptulose-bisphosphatase [EC:3.1.3.37]   (RefSeq) sedoheptulose-1,7-bisphosphatase, chloroplastic (A)                                           | Sedoheptulose-1,7-bisphosphatase, chloroplastic; EC=3.1.3.37; SED(1,7)P2ase; Sedoheptulose bisphosphatase; SBPase; Flags: Precursor (At3g55800)                                                                                     | 7.295  |
| Cs7g32500                                                   | K01803 triosephosphate isomerase (TIM) [EC:5.3.1.1]   (RefSeq) triosephosphate isomerase, cytosolic (A)                                                    | Triosephosphate isomerase, cytosolic; TIM; Triose-phosphate isomerase; EC=5.3.1.1 (At3g55440)                                                                                                                                       | -1.019 |
| <b>Citrate cycle (TCA cycle) (ko00020, P = 0.2795)</b>      |                                                                                                                                                            |                                                                                                                                                                                                                                     |        |
| Cs1g03610                                                   | K00025 malate dehydrogenase [EC:1.1.1.37]   (RefSeq) malate dehydrogenase, cytoplasmic-like (A)                                                            | Malate dehydrogenase, cytoplasmic {ECO:0000303 Ref.1}; EC=1.1.1.37 {ECO:0000269 PubMed:23313174} (At1g04410)                                                                                                                        | 1.196  |
| Cs5g01270                                                   | K00161 pyruvate dehydrogenase E1 component alpha subunit [EC:1.2.4.1]   (RefSeq) pyruvate dehydrogenase E1 component subunit alpha-3, chloroplastic (A)    | Pyruvate dehydrogenase E1 component subunit alpha-3, chloroplastic; EC=1.2.4.1; Flags: Precursor (At1g01090)                                                                                                                        | 1.356  |
| orange1.1t05835                                             | K00161 pyruvate dehydrogenase E1 component alpha subunit [EC:1.2.4.1]   (RefSeq) pyruvate dehydrogenase E1 component subunit alpha-3, chloroplastic (A)    | Pyruvate dehydrogenase E1 component subunit alpha-3, chloroplastic; EC=1.2.4.1; Flags: Precursor (At1g01090)                                                                                                                        | 2.430  |
| Cs2g03260                                                   | K00162 pyruvate dehydrogenase E1 component beta subunit [EC:1.2.4.1]   (RefSeq) pyruvate dehydrogenase E1 component subunit beta-3, chloroplastic-like (A) | Pyruvate dehydrogenase E1 component subunit beta-3, chloroplastic; EC=1.2.4.1; Flags: Precursor (At2g34590)                                                                                                                         | 2.142  |
| Cs8g06950                                                   | K00162 pyruvate dehydrogenase E1 component beta subunit [EC:1.2.4.1]   (RefSeq) pyruvate dehydrogenase E1 component subunit beta-3, chloroplastic (A)      | Pyruvate dehydrogenase E1 component subunit beta-3, chloroplastic; EC=1.2.4.1; Flags: Precursor (At2g34590)                                                                                                                         | 1.832  |
| Cs9g02470                                                   | K00382 dihydrolipoamide dehydrogenase [EC:1.8.1.4]   (RefSeq) dihydrolipoamide dehydrogenase 2, chloroplastic-like (A)                                     | Dihydrolipoamide dehydrogenase 1, chloroplastic; ptLPD1; EC=1.8.1.4; Dihydrolipoamide dehydrogenase 1; Protein LIPOAMIDE DEHYDROGENASE 1; Pyruvate dehydrogenase complex E3 subunit 1; E3-1; PDC-E3 1; Flags: Precursor (At3g16950) | 2.130  |

|           |                                                                                                                                                                                                              |                                                                                                                                                                                                                                                                                                                                                                                                                                                                                                                                                                 |        |
|-----------|--------------------------------------------------------------------------------------------------------------------------------------------------------------------------------------------------------------|-----------------------------------------------------------------------------------------------------------------------------------------------------------------------------------------------------------------------------------------------------------------------------------------------------------------------------------------------------------------------------------------------------------------------------------------------------------------------------------------------------------------------------------------------------------------|--------|
| Cs3g22480 | K00627 pyruvate dehydrogenase E2 component (dihydrolipoamide acetyltransferase) [EC:2.3.1.12]   (RefSeq) dihydrolipoamide acetyltransferase component 5 of pyruvate dehydrogenase complex, chloroplastic (A) | Dihydrolipoamide acetyltransferase component 5 of pyruvate dehydrogenase complex, chloroplastic; EC=2.3.1.12; Dihydrolipoamide S-acetyltransferase component 5 of pyruvate dehydrogenase complex; Protein EMBRYO DEFECTIVE 3003; Pyruvate dehydrogenase complex component E2 5; PDC-E2 5; PDCE2 5; Flags: Precursor (At1g34430)                                                                                                                                                                                                                                 | 2.150  |
| Cs7g13170 | K00627 pyruvate dehydrogenase E2 component (dihydrolipoamide acetyltransferase) [EC:2.3.1.12]   (RefSeq) dihydrolipoamide acetyltransferase component 4 of pyruvate dehydrogenase complex, chloroplastic (A) | Dihydrolipoamide acetyltransferase component 4 of pyruvate dehydrogenase complex, chloroplastic; EC=2.3.1.12; Dihydrolipoamide S-acetyltransferase component 4 of pyruvate dehydrogenase complex; Pyruvate dehydrogenase complex component E2 4; PDC-E2 4; PDCE2 4; pLE2; Flags: Precursor (At3g25860)                                                                                                                                                                                                                                                          | 1.902  |
| Cs1g20920 | K01610 phosphoenolpyruvate carboxykinase (ATP) [EC:4.1.1.49]   (RefSeq) phosphoenolpyruvate carboxykinase [ATP]-like (A)                                                                                     | Phosphoenolpyruvate carboxykinase (ATP); PEP carboxykinase; PEPC; EC=4.1.1.49 (At4g37870)                                                                                                                                                                                                                                                                                                                                                                                                                                                                       | -1.471 |
|           | <b>Organic acid catabolic process (GO:0016054, P = 0.4515)</b>                                                                                                                                               |                                                                                                                                                                                                                                                                                                                                                                                                                                                                                                                                                                 |        |
| Cs3g21210 | K09843 (+)-abscisic acid 8'-hydroxylase [EC:1.14.13.93]   (RefSeq) CYP707A2; abscisic acid 8'-hydroxylase 2-like (A)                                                                                         | Abscisic acid 8'-hydroxylase 3; ABA 8'-hydroxylase 3; EC=1.14.13.93; Cytochrome P450 707A3 (At5g45340)                                                                                                                                                                                                                                                                                                                                                                                                                                                          | 8.454  |
| Cs1g24480 | K04123 ent-kaurenoic acid hydroxylase [EC:1.14.13.79]   (RefSeq) ent-kaurenoic acid oxidase 2-like (A)                                                                                                       | Abscisic acid 8'-hydroxylase 3; ABA 8'-hydroxylase 3; EC=1.14.13.93; Cytochrome P450 707A7; OsABA8ox3 (At1g19630)                                                                                                                                                                                                                                                                                                                                                                                                                                               | 4.003  |
| Cs3g14590 | --                                                                                                                                                                                                           | Protein PHYLLLO, chloroplastic; Includes: Inactive isochorismate synthase; MENF; Includes: 2-succinyl-5-enolpyruvyl-6-hydroxy-3-cyclohexene-1-carboxylate synthase; EC=2.2.1.9; MEND; Includes: o-succinylbenzoate synthase; EC=4.2.1.113; MENC; Includes: 2-succinyl-6-hydroxy-2,4-cyclohexadiene-1-carboxylate synthase; EC=4.2.99.20; MENH; Flags: Precursor (At3g05600)                                                                                                                                                                                     | 3.596  |
| Cs5g28720 | K24028 salicylic acid 3-hydroxylase [EC:1.14.11.-]   (RefSeq) protein DMR6-LIKE OXYGENASE 2-like (A)                                                                                                         | Protein DMR6-LIKE OXYGENASE 1 {ECO:0000303 PubMed:25376907}; EC=1.14.11.- {ECO:0000255 PROSITE-ProRule:PRU00805}; 2-oxoglutarate (2OG)-Fe(II) oxygenase-like protein DLO1 {ECO:0000303 PubMed:25376907}; rotein SENESCENCE-ASSOCIATED GENE 108 {ECO:0000303 PubMed:23959884}; Salicylate 3-hydroxylase DLO1 {ECO:0000303 PubMed:23959884}; S3H DLO1 {ECO:0000303 PubMed:23959884}; SA 3-hydroxylase DLO1 {ECO:0000303 PubMed:23959884}; Salicylic acid 3-hydroxylase DLO1 {ECO:0000303 PubMed:23959884}; EC=1.14.13.- {ECO:0000269 PubMed:23959884} (At3g19000) | 4.401  |
| Cs5g28710 | K24028 salicylic acid 3-hydroxylase [EC:1.14.11.-]   (RefSeq) protein DMR6-LIKE OXYGENASE 2-like (A)                                                                                                         | Protein DMR6-LIKE OXYGENASE 1 {ECO:0000303 PubMed:25376907}; EC=1.14.11.- {ECO:0000255 PROSITE-ProRule:PRU00805}; 2-oxoglutarate (2OG)-Fe(II) oxygenase-like protein DLO1                                                                                                                                                                                                                                                                                                                                                                                       | -2.993 |

|                 |                                                                                                                                                                                                                                                                                               |                                                                                                                                                                                                                                                                                                                                                                                                                                                                                                                                                                 |        |
|-----------------|-----------------------------------------------------------------------------------------------------------------------------------------------------------------------------------------------------------------------------------------------------------------------------------------------|-----------------------------------------------------------------------------------------------------------------------------------------------------------------------------------------------------------------------------------------------------------------------------------------------------------------------------------------------------------------------------------------------------------------------------------------------------------------------------------------------------------------------------------------------------------------|--------|
|                 |                                                                                                                                                                                                                                                                                               | {ECO:0000303 PubMed:25376907}; Protein SENESENCE-ASSOCIATED GENE 108 {ECO:0000303 PubMed:23959884}; Salicylate 3-hydroxylase DLO1 {ECO:0000303 PubMed:23959884}; S3H DLO1 {ECO:0000303 PubMed:23959884}; SA 3-hydroxylase DLO1 {ECO:0000303 PubMed:23959884}; Salicylic acid 3-hydroxylase DLO1 {ECO:0000303 PubMed:23959884}; EC=1.14.13.- {ECO:0000269 PubMed:23959884} (At3g19000)                                                                                                                                                                           |        |
| Cs2g23860       | K00815 tyrosine aminotransferase [EC:2.6.1.5]   (RefSeq) probable aminotransferase TAT2 (A)                                                                                                                                                                                                   | Probable aminotransferase TAT2; EC=2.6.1.-; Tyrosine aminotransferase 2 (At5g53970)                                                                                                                                                                                                                                                                                                                                                                                                                                                                             | 2.234  |
| Cs5g28750       | K24028 salicylic acid 3-hydroxylase [EC:1.14.11.-]   (RefSeq) protein DOWNY MILDEW RESISTANCE 6 (A)                                                                                                                                                                                           | Protein DMR6-LIKE OXYGENASE 1 {ECO:0000303 PubMed:25376907}; EC=1.14.11.- {ECO:0000255 PROSITE-ProRule:PRU00805}; 2-oxoglutarate (2OG)-Fe(II) oxygenase-like protein DLO1 {ECO:0000303 PubMed:25376907}; Protein SENESENCE-ASSOCIATED GENE 108 {ECO:0000303 PubMed:23959884}; Salicylate 3-hydroxylase DLO1 {ECO:0000303 PubMed:23959884}; S3H DLO1 {ECO:0000303 PubMed:23959884}; SA 3-hydroxylase DLO1 {ECO:0000303 PubMed:23959884}; Salicylic acid 3-hydroxylase DLO1 {ECO:0000303 PubMed:23959884}; EC=1.14.13.- {ECO:0000269 PubMed:23959884} (At3g19000) | 4.442  |
| Cs7g12250       | K14759 isochorismate synthase / 2-succinyl-5-enolpyruvyl-6-hydroxy-3-cyclohexene-1-carboxylate synthase / 2-succinyl-6-hydroxy-2,4-cyclohexadiene-1-carboxylate synthase / O-succinylbenzoate synthase [EC:5.4.4.2 2.2.1.9 4.2.99.20 4.2.1.113]   (RefSeq) protein PHYLLLO, chloroplastic (A) | Protein PHYLLLO, chloroplastic; Includes: Inactive isochorismate synthase; MENF; Includes: 2-succinyl-5-enolpyruvyl-6-hydroxy-3-cyclohexene-1-carboxylate synthase; EC=2.2.1.9; MEND; Includes: o-succinylbenzoate synthase; EC=4.2.1.113; MENC; Includes: 2-succinyl-6-hydroxy-2,4-cyclohexadiene-1-carboxylate synthase; EC=4.2.99.20; MENH; Flags: Precursor (At1g68890)                                                                                                                                                                                     | 1.367  |
| Cs9g03990       | K00249 acyl-CoA dehydrogenase [EC:1.3.8.7]   (RefSeq) probable acyl-CoA dehydrogenase IBR3 (A)                                                                                                                                                                                                | Probable acyl-CoA dehydrogenase IBR3 {ECO:0000305}; EC=1.3.99.- {ECO:0000305}; Protein INDOLE-3-BUTYRIC ACID RESPONSE 3 {ECO:0000303 PubMed:17277896} (At3g06810)                                                                                                                                                                                                                                                                                                                                                                                               | 1.044  |
| orange1.1t03248 | K17761 succinate-semialdehyde dehydrogenase, mitochondrial [EC:1.2.1.24]   (RefSeq) succinate-semialdehyde dehydrogenase, mitochondrial (A)                                                                                                                                                   | Succinate-semialdehyde dehydrogenase, mitochondrial; At-SSADH1; EC=1.2.1.24; Aldehyde dehydrogenase family 5 member F1; NAD(+)-dependent succinic semialdehyde dehydrogenase; Flags: Precursor (At1g79440)                                                                                                                                                                                                                                                                                                                                                      | 1.373  |
| Cs8g07560       | K01583 arginine decarboxylase [EC:4.1.1.19]   (RefSeq) arginine decarboxylase-like (A)                                                                                                                                                                                                        | Arginine decarboxylase; ADC; ARGDC; EC=4.1.1.19 (At2g16500)                                                                                                                                                                                                                                                                                                                                                                                                                                                                                                     | -1.076 |
| Cs3g04530       | K00020 3-hydroxyisobutyrate dehydrogenase [EC:1.1.1.31]   (RefSeq) probable 3-hydroxyisobutyrate dehydrogenase-like 3, mitochondrial (A)                                                                                                                                                      | Probable 3-hydroxyisobutyrate dehydrogenase-like 3, mitochondrial; HIBADH-like; EC=1.1.1.31 (At1g71180)                                                                                                                                                                                                                                                                                                                                                                                                                                                         | -2.032 |

|                 |                                                                                                                      |                                                                                                                                                                                                                                                                                                                                                                                                                             |        |
|-----------------|----------------------------------------------------------------------------------------------------------------------|-----------------------------------------------------------------------------------------------------------------------------------------------------------------------------------------------------------------------------------------------------------------------------------------------------------------------------------------------------------------------------------------------------------------------------|--------|
| Cs2g23850       | K00815 tyrosine aminotransferase [EC:2.6.1.5]   (RefSeq) probable aminotransferase TAT2 (A)                          | Probable aminotransferase TAT2; EC=2.6.1.-; Tyrosine aminotransferase 2 (At5g53970)                                                                                                                                                                                                                                                                                                                                         | 1.040  |
| orange1.1t01892 | K01251 adenosylhomocysteinase [EC:3.3.1.1]   (RefSeq) adenosylhomocysteinase (A)                                     | Adenosylhomocysteinase; AdoHcyase; EC=3.3.1.1; S-adenosyl-L-homocysteine hydrolase (At4g13940)                                                                                                                                                                                                                                                                                                                              | -1.026 |
| Cs5g28780       | K24028 salicylic acid 3-hydroxylase [EC:1.14.11.-]   (RefSeq) protein DMR6-LIKE OXYGENASE 2-like (A)                 | Protein DMR6-LIKE OXYGENASE 2 {ECO:0000303 PubMed:25376907}; EC=1.14.11.- {ECO:0000255 PROSITE-ProRule:PRU00805}; 2-oxoglutarate (2OG)-Fe(II) oxygenase-like protein DLO2 {ECO:0000303 PubMed:25376907}; Salicylate 3-hydroxylase DLO2 {ECO:0000305}; S3H DLO2 {ECO:0000305}; SA 3-hydroxylase DLO2 {ECO:0000305}; Salicylic acid 3-hydroxylase DLO2 {ECO:0000305}; EC=1.14.13.- {ECO:0000250 UniProtKB:Q9ZSA8} (At3g19000) | -1.274 |
| Cs1g20840       | K13422 transcription factor MYC2   (RefSeq) transcription factor MYC2-like (A)                                       | Transcription factor bHLH93; Basic helix-loop-helix protein 93; AtbHLH93; bHLH 93; Transcription factor EN 47; bHLH transcription factor bHLH093 (At5g65640)                                                                                                                                                                                                                                                                | -1.361 |
| Cs4g18520       | K00281 glycine dehydrogenase [EC:1.4.4.2]   (RefSeq) glycine dehydrogenase (decarboxylating), mitochondrial (A)      | Glycine dehydrogenase (decarboxylating) A, mitochondrial; EC=1.4.4.2; Glycine cleavage system P protein A; Glycine decarboxylase A; Glycine dehydrogenase (aminomethyl-transferring) A; Flags: Precursor (At4g33010)                                                                                                                                                                                                        | -1.360 |
| Cs6g08630       | K00232 acyl-CoA oxidase [EC:1.3.3.6]   (RefSeq) acyl-coenzyme A oxidase 4, peroxisomal-like (A)                      | Acyl-coenzyme A oxidase 4, peroxisomal; AOX 4; EC=1.3.3.6; G6p; Short-chain acyl-CoA oxidase; AtCX4; AtG6; SAOX (At3g51840)                                                                                                                                                                                                                                                                                                 | 1.544  |
| Cs7g22860       | K02437 glycine cleavage system H protein   (RefSeq) glycine cleavage system H protein, mitochondrial (A)             | Glycine cleavage system H protein, mitochondrial; Flags: Precursor (At1g32470)                                                                                                                                                                                                                                                                                                                                              | -1.613 |
| Cs3g23530       | K09843 (+)-abscisic acid 8'-hydroxylase [EC:1.14.13.93]   (RefSeq) CYP707A4; abscisic acid 8'-hydroxylase 3-like (A) | Abscisic acid 8'-hydroxylase 3; ABA 8'-hydroxylase 3; EC=1.14.13.93; Cytochrome P450 707A7; OsABA8ox3 (At3g19270)                                                                                                                                                                                                                                                                                                           | -2.327 |
| Cs9g14500       | K24028 salicylic acid 3-hydroxylase [EC:1.14.11.-]   (RefSeq) protein DMR6-LIKE OXYGENASE 2-like (A)                 | Protein DMR6-LIKE OXYGENASE 2 {ECO:0000303 PubMed:25376907}; EC=1.14.11.- {ECO:0000255 PROSITE-ProRule:PRU00805}; 2-oxoglutarate (2OG)-Fe(II) oxygenase-like protein DLO2 {ECO:0000303 PubMed:25376907}; Salicylate 3-hydroxylase DLO2 {ECO:0000305}; S3H DLO2 {ECO:0000305}; SA 3-hydroxylase DLO2 {ECO:0000305}; Salicylic acid 3-hydroxylase DLO2 {ECO:0000305}; EC=1.14.13.- {ECO:0000250 UniProtKB:Q9ZSA8} (At4g10490) | 1.351  |
| Cs1g12310       | K24028 salicylic acid 3-hydroxylase [EC:1.14.11.-]   (RefSeq) protein DMR6-LIKE OXYGENASE 2-like (A)                 | Protein DMR6-LIKE OXYGENASE 1 {ECO:0000303 PubMed:25376907}; EC=1.14.11.- {ECO:0000255 PROSITE-ProRule:PRU00805}; 2-oxoglutarate (2OG)-Fe(II) oxygenase-like protein DLO1 {ECO:0000303 PubMed:25376907}; Protein SENESCENCE-ASSOCIATED GENE 108 {ECO:0000303 PubMed:23959884}; Salicylate 3-hydroxylase DLO1 {ECO:0000303 PubMed:23959884}; S3H DLO1 {ECO:0000303 PubMed:23959884}; SA 3-hydroxylase DLO1                   | -1.942 |

|                                                  |                                                                                                                                                                                                                         |                                                                                                                                                                                                                                                                                                                                            |        |
|--------------------------------------------------|-------------------------------------------------------------------------------------------------------------------------------------------------------------------------------------------------------------------------|--------------------------------------------------------------------------------------------------------------------------------------------------------------------------------------------------------------------------------------------------------------------------------------------------------------------------------------------|--------|
|                                                  |                                                                                                                                                                                                                         | {ECO:0000303 PubMed:23959884}; Salicylic acid 3-hydroxylase DLO1 {ECO:0000303 PubMed:23959884}; EC=1.14.13.- {ECO:0000269 PubMed:23959884} (At4g10500)                                                                                                                                                                                     |        |
|                                                  |                                                                                                                                                                                                                         |                                                                                                                                                                                                                                                                                                                                            |        |
| <b>Pyruvate metabolism (ko00620, P = 0.0002)</b> |                                                                                                                                                                                                                         |                                                                                                                                                                                                                                                                                                                                            |        |
| Cs1g03610                                        | K00025 malate dehydrogenase [EC:1.1.1.37]   (RefSeq) malate dehydrogenase, cytoplasmic-like (A)                                                                                                                         | Malate dehydrogenase, cytoplasmic {ECO:0000303 Ref.1}; EC=1.1.1.37 {ECO:0000269 PubMed:23313174} (At1g04410)                                                                                                                                                                                                                               | 1.196  |
| Cs4g15270                                        | K00029 malate dehydrogenase (oxaloacetate-decarboxylating)(NADP+) [EC:1.1.1.40]   (RefSeq) NADP-dependent malic enzyme (A)                                                                                              | NADP-dependent malic enzyme; NADP-ME; EC=1.1.1.40 (At2g19900)                                                                                                                                                                                                                                                                              | -1.155 |
| Cs4g19200                                        | K00029 malate dehydrogenase (oxaloacetate-decarboxylating)(NADP+) [EC:1.1.1.40]   (RefSeq) NADP-dependent malic enzyme (A)                                                                                              | NADP-dependent malic enzyme; NADP-ME; EC=1.1.1.40 (At5g25880)                                                                                                                                                                                                                                                                              | -1.197 |
| Cs5g01270                                        | K00161 pyruvate dehydrogenase E1 component alpha subunit [EC:1.2.4.1]   (RefSeq) pyruvate dehydrogenase E1 component subunit alpha-3, chloroplastic (A)                                                                 | Pyruvate dehydrogenase E1 component subunit alpha-3, chloroplastic; EC=1.2.4.1; Flags: Precursor (At1g01090)                                                                                                                                                                                                                               | 1.356  |
| orange1.1t05835                                  | K00161 pyruvate dehydrogenase E1 component alpha subunit [EC:1.2.4.1]   (RefSeq) pyruvate dehydrogenase E1 component subunit alpha-3, chloroplastic (A)                                                                 | Pyruvate dehydrogenase E1 component subunit alpha-3, chloroplastic; EC=1.2.4.1; Flags: Precursor (At1g01090)                                                                                                                                                                                                                               | 2.430  |
| Cs2g03260                                        | K00162 pyruvate dehydrogenase E1 component beta subunit [EC:1.2.4.1]   (RefSeq) pyruvate dehydrogenase E1 component subunit beta-3, chloroplastic-like (A)                                                              | Pyruvate dehydrogenase E1 component subunit beta-3, chloroplastic; EC=1.2.4.1; Flags: Precursor (At2g34590)                                                                                                                                                                                                                                | 2.142  |
| Cs8g06950                                        | K00162 pyruvate dehydrogenase E1 component beta subunit [EC:1.2.4.1]   (RefSeq) pyruvate dehydrogenase E1 component subunit beta-3, chloroplastic (A)                                                                   | Pyruvate dehydrogenase E1 component subunit beta-3, chloroplastic; EC=1.2.4.1; Flags: Precursor (At2g34590)                                                                                                                                                                                                                                | 1.832  |
| Cs9g02470                                        | K00382 dihydrolipoamide dehydrogenase [EC:1.8.1.4]   (RefSeq) dihydrolipoamide dehydrogenase 2, chloroplastic-like (A)                                                                                                  | Dihydrolipoyl dehydrogenase 1, chloroplastic; ptLPD1; EC=1.8.1.4; Dihydrolipoamide dehydrogenase 1; Protein LIPOAMIDE DEHYDROGENASE 1; Pyruvate dehydrogenase complex E3 subunit 1; E3-1; PDC-E3 1; Flags: Precursor (At3g16950)                                                                                                           | 2.130  |
| Cs3g22480                                        | K00627 pyruvate dehydrogenase E2 component (dihydrolipoamide acetyltransferase) [EC:2.3.1.12]   (RefSeq) dihydrolipoyllysine-residue acetyltransferase component 5 of pyruvate dehydrogenase complex, chloroplastic (A) | Dihydrolipoyllysine-residue acetyltransferase component 5 of pyruvate dehydrogenase complex, chloroplastic; EC=2.3.1.12; Dihydrolipoamide S-acetyltransferase component 5 of pyruvate dehydrogenase complex; Protein EMBRYO DEFECTIVE 3003; Pyruvate dehydrogenase complex component E2 5; PDC-E2 5; PDCE2 5; Flags: Precursor (At1g34430) | 2.150  |
| Cs7g13170                                        | K00627 pyruvate dehydrogenase E2 component (dihydrolipoamide acetyltransferase) [EC:2.3.1.12]   (RefSeq) dihydrolipoyllysine-residue acetyltransferase component 4 of pyruvate dehydrogenase complex, chloroplastic (A) | Dihydrolipoyllysine-residue acetyltransferase component 4 of pyruvate dehydrogenase complex, chloroplastic; EC=2.3.1.12; Dihydrolipoamide S-acetyltransferase component 4 of pyruvate dehydrogenase complex; Pyruvate dehydrogenase complex component E2 4; PDC-E2 4; PDCE2 4; pLE2; Flags: Precursor (At3g25860)                          | 1.902  |

|           |                                                                                                                                    |                                                                                                                                                                                                                                          |        |
|-----------|------------------------------------------------------------------------------------------------------------------------------------|------------------------------------------------------------------------------------------------------------------------------------------------------------------------------------------------------------------------------------------|--------|
| Cs8g03650 | K00873 pyruvate kinase [EC:2.7.1.40]   (RefSeq) pyruvate kinase isozyme A, chloroplastic-like (A)                                  | Pyruvate kinase isozyme A, chloroplastic; EC=2.7.1.40; Flags: Precursor (At3g22960)                                                                                                                                                      | 2.299  |
| Cs9g07880 | K00873 pyruvate kinase [EC:2.7.1.40]   (RefSeq) pyruvate kinase isozyme A, chloroplastic (A)                                       | Pyruvate kinase isozyme A, chloroplastic; EC=2.7.1.40; Flags: Precursor (At3g22960)                                                                                                                                                      | 1.213  |
| Cs9g18710 | K00873 pyruvate kinase [EC:2.7.1.40]   (RefSeq) plastidial pyruvate kinase 2 (A)                                                   | Plastidial pyruvate kinase 2; PKp2; EC=2.7.1.40; Plastidial pyruvate kinase 1; PKP1; Pyruvate kinase III; Pyruvate kinase isozyme B1, chloroplastic; PKP-BETA1; Plastidic pyruvate kinase beta subunit 1; Flags: Precursor (At5g52920)   | 1.963  |
| Cs9g05370 | K01006 pyruvate, orthophosphate dikinase [EC:2.7.9.1]   (RefSeq) pyruvate, phosphate dikinase, chloroplastic (A)                   | Pyruvate, phosphate dikinase, chloroplastic; EC=2.7.9.1 {ECO:0000250 UniProtKB:P11155}; Pyruvate, orthophosphate dikinase; Flags: Precursor (At4g15530)                                                                                  | 2.484  |
| Cs2g15520 | K01595 phosphoenolpyruvate carboxylase [EC:4.1.1.31]   (RefSeq) phosphoenolpyruvate carboxylase 2 (A)                              | Phosphoenolpyruvate carboxylase 2; AtPPC2; PEPC 2; PEPCase 2; EC=4.1.1.31 (At3g14940)                                                                                                                                                    | -1.299 |
| Cs1g20920 | K01610 phosphoenolpyruvate carboxykinase (ATP) [EC:4.1.1.49]   (RefSeq) phosphoenolpyruvate carboxykinase [ATP]-like (A)           | Phosphoenolpyruvate carboxykinase (ATP); PEP carboxykinase; PEPCCK; EC=4.1.1.49 (At4g37870)                                                                                                                                              | -1.471 |
| Cs5g06930 | K01638 malate synthase [EC:2.3.3.9]   (RefSeq) malate synthase, glyoxysomal (A)                                                    | Malate synthase, glyoxysomal; EC=2.3.3.9 (At5g03860)                                                                                                                                                                                     | -1.677 |
| Cs2g03000 | K01759 lactoylglutathione lyase [EC:4.4.1.5]   (RefSeq) putative lactoylglutathione lyase (A)                                      | Lactoylglutathione lyase GLX1 {ECO:0000303 PubMed:17404219}; EC=4.4.1.5 {ECO:0000250 UniProtKB:Q04760}; Glyoxalase I {ECO:0000303 PubMed:17404219}; AtGLX1 {ECO:0000303 PubMed:17404219}; GlyI {ECO:0000303 PubMed:17404219} (At1g11840) | -3.025 |
| Cs9g02530 | K01913 acetate---CoA ligase [EC:6.2.1.1]   (RefSeq) acetate/butyrate--CoA ligase AAE7, peroxisomal-like (A)                        | Acetate/butyrate--CoA ligase AAE7, peroxisomal; EC=6.2.1.1; EC=6.2.1.2; AMP-binding protein 7; AtAMPBP7; Acetyl-CoA synthetase; Acyl-activating enzyme 7; Butyryl-CoA synthetase; Protein ACETATE NON-UTILIZING 1 (At3g16910)            | -1.387 |
| Cs9g02540 | K01913 acetate---CoA ligase [EC:6.2.1.1]   (RefSeq) acetate/butyrate--CoA ligase AAE7, peroxisomal-like (A)                        | Acetate/butyrate--CoA ligase AAE7, peroxisomal; EC=6.2.1.1; EC=6.2.1.2; AMP-binding protein 7; AtAMPBP7; Acetyl-CoA synthetase; Acyl-activating enzyme 7; Butyryl-CoA synthetase; Protein ACETATE NON-UTILIZING 1 (At3g16910)            | -2.024 |
| Cs9g02550 | K01913 acetate---CoA ligase [EC:6.2.1.1]   (RefSeq) acetate/butyrate--CoA ligase AAE7, peroxisomal-like (A)                        | Acetate/butyrate--CoA ligase AAE7, peroxisomal; EC=6.2.1.1; EC=6.2.1.2; AMP-binding protein 7; AtAMPBP7; Acetyl-CoA synthetase; Acyl-activating enzyme 7; Butyryl-CoA synthetase; Protein ACETATE NON-UTILIZING 1 (At3g16910)            | 3.002  |
| Cs4g04540 | K01961 acetyl-CoA carboxylase, biotin carboxylase subunit [EC:6.4.1.2 6.3.4.14]   (RefSeq) biotin carboxylase 2, chloroplastic (A) | Biotin carboxylase 2, chloroplastic; EC=6.3.4.14; Acetyl-CoA carboxylase subunit A 2; ACC; EC=6.4.1.2; Flags: Precursor (At5g35360)                                                                                                      | 2.293  |

|                                                                  |                                                                                                                                                                                       |                                                                                                                                                                                                                                                     |        |
|------------------------------------------------------------------|---------------------------------------------------------------------------------------------------------------------------------------------------------------------------------------|-----------------------------------------------------------------------------------------------------------------------------------------------------------------------------------------------------------------------------------------------------|--------|
| Cs6g07610                                                        | K01962 acetyl-CoA carboxylase carboxyl transferase subunit alpha [EC:6.4.1.2 2.1.3.15]   (RefSeq) acetyl-coenzyme A carboxylase carboxyl transferase subunit alpha, chloroplastic (A) | Acetyl-coenzyme A carboxylase carboxyl transferase subunit alpha, chloroplastic; ACCase subunit alpha; Acetyl-CoA carboxylase carboxyltransferase subunit alpha; EC=6.4.1.2; Flags: Precursor (At2g38040)                                           | 2.188  |
| Cs6g02920                                                        | K02160 acetyl-CoA carboxylase biotin carboxyl carrier protein   (RefSeq) biotin carboxyl carrier protein of acetyl-CoA carboxylase, chloroplastic (A)                                 | Biotin carboxyl carrier protein of acetyl-CoA carboxylase, chloroplastic; BCCP; Flags: Precursor (At5g16390)                                                                                                                                        | 1.749  |
| Cs6g22090                                                        | K02160 acetyl-CoA carboxylase biotin carboxyl carrier protein   (RefSeq) biotin carboxyl carrier protein of acetyl-CoA carboxylase 2, chloroplastic (A)                               | Biotin carboxyl carrier protein of acetyl-CoA carboxylase 2, chloroplastic; AtBCCP2; BCCP-2; Flags: Precursor (At5g15530)                                                                                                                           | 3.136  |
| <b><i>Glycolysis / Gluconeogenesis (ko00010, P = 0.0251)</i></b> |                                                                                                                                                                                       |                                                                                                                                                                                                                                                     |        |
| orange1.1t03053                                                  | K00002 alcohol dehydrogenase (NADP+) [EC:1.1.1.2]   (RefSeq) aldo-keto reductase family 4 member C9-like (A)                                                                          | NADPH-dependent aldo-keto reductase, chloroplastic {ECO:0000303 PubMed:21169366}; AtChIAKR {ECO:0000303 PubMed:21169366}; EC=1.1.1.- {ECO:0000269 PubMed:19616008, ECO:0000269 PubMed:21169366}; Aldo-keto reductase family 4 member C9 (At2g37770) | -1.761 |
| Cs3g17970                                                        | K00121 S-(hydroxymethyl) glutathione dehydrogenase / alcohol dehydrogenase [EC:1.1.1.284 1.1.1.1]   (RefSeq) alcohol dehydrogenase-like 2 (A)                                         | Alcohol dehydrogenase-like 2; EC=1.1.1.1 {ECO:0000250 UniProtKB:P06525} (At1g22440)                                                                                                                                                                 | -1.741 |
| Cs7g14420                                                        | K00121 S-(hydroxymethyl) glutathione dehydrogenase / alcohol dehydrogenase [EC:1.1.1.284 1.1.1.1]   (RefSeq) alcohol dehydrogenase-like 2 (A)                                         | Alcohol dehydrogenase-like 2; EC=1.1.1.1 {ECO:0000250 UniProtKB:P06525} (At1g22440)                                                                                                                                                                 | 1.064  |
| orange1.1t05469                                                  | K00121 S-(hydroxymethyl) glutathione dehydrogenase / alcohol dehydrogenase [EC:1.1.1.284 1.1.1.1]   (RefSeq) alcohol dehydrogenase-like 2 (A)                                         | Alcohol dehydrogenase-like 2; EC=1.1.1.1 {ECO:0000250 UniProtKB:P06525} (At1g22440)                                                                                                                                                                 | -1.458 |
| novel.2520                                                       | K00121 S-(hydroxymethyl)glutathione dehydrogenase / alcohol dehydrogenase [EC:1.1.1.284 1.1.1.1]   (RefSeq) alcohol dehydrogenase-like 2 (A)                                          | (At5g16660)                                                                                                                                                                                                                                         | 1.174  |
| novel.818                                                        | K00134 glyceraldehyde 3-phosphate dehydrogenase [EC:1.2.1.12]   (RefSeq) glyceraldehyde-3-phosphate dehydrogenase GAPC1, cytosolic (A)                                                | Glyceraldehyde-3-phosphate dehydrogenase, cytosolic; EC=1.2.1.12; Flags: Fragment (At1g13440)                                                                                                                                                       | -1.068 |
| Cs5g01270                                                        | K00161 pyruvate dehydrogenase E1 component alpha subunit [EC:1.2.4.1]   (RefSeq) pyruvate dehydrogenase E1 component subunit alpha-3, chloroplastic (A)                               | Pyruvate dehydrogenase E1 component subunit alpha-3, chloroplastic; EC=1.2.4.1; Flags: Precursor (At1g01090)                                                                                                                                        | 1.356  |
| orange1.1t05835                                                  | K00161 pyruvate dehydrogenase E1 component alpha subunit [EC:1.2.4.1]   (RefSeq) pyruvate dehydrogenase E1 component subunit alpha-3, chloroplastic (A)                               | Pyruvate dehydrogenase E1 component subunit alpha-3, chloroplastic; EC=1.2.4.1; Flags: Precursor (At1g01090)                                                                                                                                        | 2.430  |
| Cs2g03260                                                        | K00162 pyruvate dehydrogenase E1 component beta subunit [EC:1.2.4.1]   (RefSeq) pyruvate dehydrogenase E1 component subunit beta-3, chloroplastic-like (A)                            | Pyruvate dehydrogenase E1 component subunit beta-3, chloroplastic; EC=1.2.4.1; Flags: Precursor (At2g34590)                                                                                                                                         | 2.142  |

|           |                                                                                                                                                                                                              |                                                                                                                                                                                                                                                                                                                                  |        |
|-----------|--------------------------------------------------------------------------------------------------------------------------------------------------------------------------------------------------------------|----------------------------------------------------------------------------------------------------------------------------------------------------------------------------------------------------------------------------------------------------------------------------------------------------------------------------------|--------|
| Cs8g06950 | K00162 pyruvate dehydrogenase E1 component beta subunit [EC:1.2.4.1]   (RefSeq) pyruvate dehydrogenase E1 component subunit beta-3, chloroplastic (A)                                                        | Pyruvate dehydrogenase E1 component subunit beta-3, chloroplastic; EC=1.2.4.1; Flags: Precursor (At2g34590)                                                                                                                                                                                                                      | 1.832  |
| Cs9g02470 | K00382 dihydrolipoamide dehydrogenase [EC:1.8.1.4]   (RefSeq) dihydrolipoamide dehydrogenase 2, chloroplastic-like (A)                                                                                       | Dihydrolipoamide dehydrogenase 1, chloroplastic; ptLPD1; EC=1.8.1.4; Dihydrolipoamide dehydrogenase 1; Protein LIPOAMIDE DEHYDROGENASE 1; Pyruvate dehydrogenase complex E3 subunit 1; E3-1; PDC-E3 1; Flags: Precursor (At3g16950)                                                                                              | 2.130  |
| Cs3g22480 | K00627 pyruvate dehydrogenase E2 component (dihydrolipoamide acetyltransferase) [EC:2.3.1.12]   (RefSeq) dihydrolipoamide acetyltransferase component 5 of pyruvate dehydrogenase complex, chloroplastic (A) | Dihydrolipoamide acetyltransferase component 5 of pyruvate dehydrogenase complex, chloroplastic; EC=2.3.1.12; Dihydrolipoamide S-acetyltransferase component 5 of pyruvate dehydrogenase complex; Protein EMBRYO DEFECTIVE 3003; Pyruvate dehydrogenase complex component E2 5; PDC-E2 5; PDCE2 5; Flags: Precursor (At1g34430)  | 2.150  |
| Cs7g13170 | K00627 pyruvate dehydrogenase E2 component (dihydrolipoamide acetyltransferase) [EC:2.3.1.12]   (RefSeq) dihydrolipoamide acetyltransferase component 4 of pyruvate dehydrogenase complex, chloroplastic (A) | Dihydrolipoamide acetyltransferase component 4 of pyruvate dehydrogenase complex, chloroplastic; EC=2.3.1.12; Dihydrolipoamide S-acetyltransferase component 4 of pyruvate dehydrogenase complex; Pyruvate dehydrogenase complex component E2 4; PDC-E2 4; PDCE2 4; pLE2; Flags: Precursor (At3g25860)                           | 1.902  |
| Cs1g15840 | K00844 hexokinase [EC:2.7.1.1]   (RefSeq) hexokinase-1-like (A)                                                                                                                                              | Hexokinase-1; EC=2.7.1.1; NtHxK1 (At4g29130)                                                                                                                                                                                                                                                                                     | -2.510 |
| Cs3g26050 | K00844 hexokinase [EC:2.7.1.1]   (RefSeq) hexokinase-2, chloroplastic (A)                                                                                                                                    | Hexokinase-2, chloroplastic; EC=2.7.1.1; NtHxK2; Flags: Precursor (At1g47840)                                                                                                                                                                                                                                                    | 1.128  |
| Cs1g15970 | K00850 6-phosphofructokinase 1 [EC:2.7.1.11]   (RefSeq) ATP-dependent 6-phosphofructokinase 3-like (A)                                                                                                       | ATP-dependent 6-phosphofructokinase 3 {ECO:0000255 HAMAP-Rule:MF_03186}; ATP-PFK 3 {ECO:0000255 HAMAP-Rule:MF_03186}; Phosphofructokinase 3 {ECO:0000255 HAMAP-Rule:MF_03186}; EC=2.7.1.11 {ECO:0000255 HAMAP-Rule:MF_03186}; Phosphohexokinase 3 {ECO:0000255 HAMAP-Rule:MF_03186} (At4g29220)                                  | 1.165  |
| Cs1g20200 | K00850 6-phosphofructokinase 1 [EC:2.7.1.11]   (RefSeq) ATP-dependent 6-phosphofructokinase 5, chloroplastic (A)                                                                                             | ATP-dependent 6-phosphofructokinase 5, chloroplastic {ECO:0000255 HAMAP-Rule:MF_03186}; ATP-PFK 5 {ECO:0000255 HAMAP-Rule:MF_03186}; Phosphofructokinase 5 {ECO:0000255 HAMAP-Rule:MF_03186}; EC=2.7.1.11 {ECO:0000255 HAMAP-Rule:MF_03186}; Phosphohexokinase 5 {ECO:0000255 HAMAP-Rule:MF_03186}; Flags: Precursor (At2g22480) | 1.593  |
| Cs4g18980 | K00850 6-phosphofructokinase 1 [EC:2.7.1.11]   (RefSeq) ATP-dependent 6-phosphofructokinase 6 (A)                                                                                                            | ATP-dependent 6-phosphofructokinase 3 {ECO:0000255 HAMAP-Rule:MF_03186}; ATP-PFK 3 {ECO:0000255 HAMAP-Rule:MF_03186}; Phosphofructokinase 3 {ECO:0000255 HAMAP-Rule:MF_03186}; EC=2.7.1.11 {ECO:0000255 HAMAP-Rule:MF_03186}; Phosphohexokinase 3 {ECO:0000255 HAMAP-Rule:MF_03186} (At4g32840)                                  | -2.038 |

|                                                        |                                                                                                                          |                                                                                                                                                                                                                                                                                                          |        |
|--------------------------------------------------------|--------------------------------------------------------------------------------------------------------------------------|----------------------------------------------------------------------------------------------------------------------------------------------------------------------------------------------------------------------------------------------------------------------------------------------------------|--------|
| Cs8g03650                                              | K00873 pyruvate kinase [EC:2.7.1.40]   (RefSeq) pyruvate kinase isozyme A, chloroplastic-like (A)                        | Pyruvate kinase isozyme A, chloroplastic; EC=2.7.1.40; Flags: Precursor (At3g22960)                                                                                                                                                                                                                      | 2.299  |
| Cs9g07880                                              | K00873 pyruvate kinase [EC:2.7.1.40]   (RefSeq) pyruvate kinase isozyme A, chloroplastic (A)                             | Pyruvate kinase isozyme A, chloroplastic; EC=2.7.1.40; Flags: Precursor (At3g22960)                                                                                                                                                                                                                      | 1.213  |
| Cs9g18710                                              | K00873 pyruvate kinase [EC:2.7.1.40]   (RefSeq) plastidial pyruvate kinase 2 (A)                                         | Plastidial pyruvate kinase 2; PKp2; EC=2.7.1.40; Plastidial pyruvate kinase 1; PKP1; Pyruvate kinase III; Pyruvate kinase isozyme B1, chloroplastic; PKP-BETA1; Plastidic pyruvate kinase beta subunit 1; Flags: Precursor (At5g52920)                                                                   | 1.963  |
| Cs9g05370                                              | K01006 pyruvate, orthophosphate dikinase [EC:2.7.9.1]   (RefSeq) pyruvate, phosphate dikinase, chloroplastic (A)         | Pyruvate, phosphate dikinase, chloroplastic; EC=2.7.9.1 {ECO:0000250 UniProtKB:P11155}; Pyruvate, orthophosphate dikinase; Flags: Precursor (At4g15530)                                                                                                                                                  | 2.484  |
| Cs1g20920                                              | K01610 phosphoenolpyruvate carboxykinase (ATP) [EC:4.1.1.49]   (RefSeq) phosphoenolpyruvate carboxykinase [ATP]-like (A) | Phosphoenolpyruvate carboxykinase (ATP); PEP carboxykinase; PEPCK; EC=4.1.1.49 (At4g37870)                                                                                                                                                                                                               | -1.471 |
| Cs7g26180                                              | K01689 enolase [EC:4.2.1.11]   (RefSeq) enolase 1, chloroplastic (A)                                                     | Enolase 1, chloroplastic; EC=4.2.1.11; 2-phospho-D-glycerate hydro-lyase 1; 2-phosphoglycerate dehydratase 1; Flags: Precursor (At1g74030)                                                                                                                                                               | 1.238  |
| Cs5g26580                                              | K01792 glucose-6-phosphate 1-epimerase [EC:5.1.3.15]   (RefSeq) putative glucose-6-phosphate 1-epimerase (A)             | Photosynthetic NDH subunit of subcomplex B 2, chloroplastic {ECO:0000303 PubMed:21785130}; Protein PnsB2 {ECO:0000303 PubMed:21785130}; NAD(P)H DEHYDROGENASE SUBUNIT 45 {ECO:0000303 PubMed:18974055}; NDH-DEPENDENT CYCLIC ELECTRON FLOW 2 {ECO:0000303 PubMed:18785996}; Flags: Precursor (At1g64770) | 2.507  |
| Cs7g32500                                              | K01803 triosephosphate isomerase (TIM) [EC:5.3.1.1]   (RefSeq) triosephosphate isomerase, cytosolic (A)                  | Triosephosphate isomerase, cytosolic; TIM; Triose-phosphate isomerase; EC=5.3.1.1 (At3g55440)                                                                                                                                                                                                            | -1.019 |
| Cs9g02530                                              | K01913 acetate---CoA ligase [EC:6.2.1.1]   (RefSeq) acetate/butyrate--CoA ligase AAE7, peroxisomal-like (A)              | Acetate/butyrate--CoA ligase AAE7, peroxisomal; EC=6.2.1.1; EC=6.2.1.2; AMP-binding protein 7; AtAMPBP7; Acetyl-CoA synthetase; Acyl-activating enzyme 7; Butyryl-CoA synthetase; Protein ACETATE NON-UTILIZING 1 (At3g16910)                                                                            | -1.387 |
| Cs9g02540                                              | K01913 acetate---CoA ligase [EC:6.2.1.1]   (RefSeq) acetate/butyrate--CoA ligase AAE7, peroxisomal-like (A)              | Acetate/butyrate--CoA ligase AAE7, peroxisomal; EC=6.2.1.1; EC=6.2.1.2; AMP-binding protein 7; AtAMPBP7; Acetyl-CoA synthetase; Acyl-activating enzyme 7; Butyryl-CoA synthetase; Protein ACETATE NON-UTILIZING 1 (At3g16910)                                                                            | -2.024 |
| Cs9g02550                                              | K01913 acetate---CoA ligase [EC:6.2.1.1]   (RefSeq) acetate/butyrate--CoA ligase AAE7, peroxisomal-like (A)              | Acetate/butyrate--CoA ligase AAE7, peroxisomal; EC=6.2.1.1; EC=6.2.1.2; AMP-binding protein 7; AtAMPBP7; Acetyl-CoA synthetase; Acyl-activating enzyme 7; Butyryl-CoA synthetase; Protein ACETATE NON-UTILIZING 1 (At3g16910)                                                                            | 3.002  |
|                                                        |                                                                                                                          |                                                                                                                                                                                                                                                                                                          |        |
| <b>Pentose phosphate pathway (ko00030, P = 0.9484)</b> |                                                                                                                          |                                                                                                                                                                                                                                                                                                          |        |

|                                                               |                                                                                                                                             |                                                                                                                                                                                                                                                                                                                                  |        |
|---------------------------------------------------------------|---------------------------------------------------------------------------------------------------------------------------------------------|----------------------------------------------------------------------------------------------------------------------------------------------------------------------------------------------------------------------------------------------------------------------------------------------------------------------------------|--------|
| novel.1025                                                    | K00036 glucose-6-phosphate 1-dehydrogenase [EC:1.1.1.49 1.1.1.363]   (RefSeq) glucose-6-phosphate 1-dehydrogenase 4, chloroplastic-like (A) | Glucose-6-phosphate 1-dehydrogenase 4, chloroplastic; G6PD4; G6PDH4; EC=1.1.1.49; Flags: Precursor (At1g09420)                                                                                                                                                                                                                   | -1.056 |
| Cs5g09210                                                     | K00616 transaldolase [EC:2.2.1.2]   (RefSeq) transaldolase (A)                                                                              | (At1g12230)                                                                                                                                                                                                                                                                                                                      | 1.331  |
| Cs1g15970                                                     | K00850 6-phosphofructokinase 1 [EC:2.7.1.11]   (RefSeq) ATP-dependent 6-phosphofructokinase 3-like (A)                                      | ATP-dependent 6-phosphofructokinase 3 {ECO:0000255 HAMAP-Rule:MF_03186}; ATP-PFK 3 {ECO:0000255 HAMAP-Rule:MF_03186}; Phosphofructokinase 3 {ECO:0000255 HAMAP-Rule:MF_03186}; EC=2.7.1.11 {ECO:0000255 HAMAP-Rule:MF_03186}; Phosphohexokinase 3 {ECO:0000255 HAMAP-Rule:MF_03186} (At4g29220)                                  | 1.165  |
| Cs1g20200                                                     | K00850 6-phosphofructokinase 1 [EC:2.7.1.11]   (RefSeq) ATP-dependent 6-phosphofructokinase 5, chloroplastic (A)                            | ATP-dependent 6-phosphofructokinase 5, chloroplastic {ECO:0000255 HAMAP-Rule:MF_03186}; ATP-PFK 5 {ECO:0000255 HAMAP-Rule:MF_03186}; Phosphofructokinase 5 {ECO:0000255 HAMAP-Rule:MF_03186}; EC=2.7.1.11 {ECO:0000255 HAMAP-Rule:MF_03186}; Phosphohexokinase 5 {ECO:0000255 HAMAP-Rule:MF_03186}; Flags: Precursor (At2g22480) | 1.593  |
| Cs4g18980                                                     | K00850 6-phosphofructokinase 1 [EC:2.7.1.11]   (RefSeq) ATP-dependent 6-phosphofructokinase 6 (A)                                           | ATP-dependent 6-phosphofructokinase 3 {ECO:0000255 HAMAP-Rule:MF_03186}; ATP-PFK 3 {ECO:0000255 HAMAP-Rule:MF_03186}; Phosphofructokinase 3 {ECO:0000255 HAMAP-Rule:MF_03186}; EC=2.7.1.11 {ECO:0000255 HAMAP-Rule:MF_03186}; Phosphohexokinase 3 {ECO:0000255 HAMAP-Rule:MF_03186} (At4g32840)                                  | -2.038 |
| <b><i>Oxidative phosphorylation (ko00190, P = 0.9767)</i></b> |                                                                                                                                             |                                                                                                                                                                                                                                                                                                                                  |        |
| orange1.1t00583                                               | K01507 inorganic pyrophosphatase [EC:3.6.1.1]   (RefSeq) soluble inorganic pyrophosphatase 1-like (A)                                       | Soluble inorganic pyrophosphatase 1 {ECO:0000303 PubMed:15135060}; EC=3.6.1.1 {ECO:0000269 Ref.9}; Pyrophosphate phospho-hydrolase 1 {ECO:0000303 PubMed:15135060}; PPase 1 {ECO:0000303 PubMed:15135060} (At1g01050)                                                                                                            | 1.500  |
| Cs1g03320                                                     | K01535 H <sup>+</sup> -transporting ATPase [EC:3.6.3.6]   (RefSeq) ATPase 11, plasma membrane-type (A)                                      | Plasma membrane ATPase 1; EC=3.6.3.6; Proton pump 1 (At2g44850_2)                                                                                                                                                                                                                                                                | 1.049  |
| Cs5g08370                                                     | K01535 H <sup>+</sup> -transporting ATPase [EC:3.6.3.6]   (RefSeq) ATPase 11, plasma membrane-type-like (A)                                 | ATPase 11, plasma membrane-type; EC=3.6.3.6; Proton pump 11 (At5g62670)                                                                                                                                                                                                                                                          | 8.092  |
| Cs6g03420                                                     | K01535 H <sup>+</sup> -transporting ATPase [EC:3.6.3.6]   (RefSeq) plasma membrane ATPase 1-like (A)                                        | Plasma membrane ATPase 1; EC=3.6.3.6; Proton pump 1 (At5g62670)                                                                                                                                                                                                                                                                  | 1.431  |
| Cs6g03430                                                     | K01535 H <sup>+</sup> -transporting ATPase [EC:3.6.3.6]   (RefSeq) plasma membrane ATPase 1-like (A)                                        | ATPase 7, plasma membrane-type; EC=3.6.3.6; Proton pump 7 (At3g60330)                                                                                                                                                                                                                                                            | 4.784  |
| Cs6g03440                                                     | K01535 H <sup>+</sup> -transporting ATPase [EC:3.6.3.6]   (RefSeq) plasma membrane ATPase 1-like (A)                                        | Plasma membrane ATPase 1; EC=3.6.3.6; Proton pump 1 (At5g62670)                                                                                                                                                                                                                                                                  | 3.613  |
| Cs6g03445                                                     | K01535 H <sup>+</sup> -transporting ATPase [EC:3.6.3.6]   (RefSeq) ATPase 11, plasma membrane-type (A)                                      | ATPase 4, plasma membrane-type; EC=3.6.3.6; Proton pump 4 (At1g80660)                                                                                                                                                                                                                                                            | 3.771  |

|                                                          |                                                                                                                                                                                                              |                                                                                                                                                                                                                                                                                                                                                       |       |
|----------------------------------------------------------|--------------------------------------------------------------------------------------------------------------------------------------------------------------------------------------------------------------|-------------------------------------------------------------------------------------------------------------------------------------------------------------------------------------------------------------------------------------------------------------------------------------------------------------------------------------------------------|-------|
| Cs6g03470                                                | K01535 H <sup>+</sup> -transporting ATPase [EC:3.6.3.6]   (RefSeq) plasma membrane ATPase 1-like (A)                                                                                                         | Putative ATPase, plasma membrane-like (At4g11730)                                                                                                                                                                                                                                                                                                     | 4.461 |
| Cs3g25560                                                | K02154 V-type H <sup>+</sup> -transporting ATPase subunit a   (RefSeq) V-type proton ATPase subunit a3 (A)                                                                                                   | V-type proton ATPase subunit a3; V-ATPase subunit a3; V-type proton ATPase 95 kDa subunit a isoform 3; V-ATPase 95 kDa isoform a3; Vacuolar H(+)-ATPase subunit a isoform 3; Vacuolar proton pump subunit a3; Vacuolar proton translocating ATPase 95 kDa subunit a isoform 3 (At4g39080)                                                             | 1.143 |
| novel.617                                                | K05579 NAD(P)H-quinone oxidoreductase subunit H [EC:1.6.5.3]   (RefSeq) ndhH, CisiCp079; NADH dehydrogenase subunit 7 (A)                                                                                    | NAD(P)H-quinone oxidoreductase subunit H, chloroplastic {ECO:0000255 HAMAP-Rule:MF_01358}; EC=1.6.5.- {ECO:0000255 HAMAP-Rule:MF_01358}; NAD(P)H dehydrogenase subunit H; NADH-plastoquinone oxidoreductase 49 kDa subunit {ECO:0000255 HAMAP-Rule:MF_01358}; NADH-plastoquinone oxidoreductase subunit H {ECO:0000255 HAMAP-Rule:MF_01358} (AtCh079) | 1.335 |
| <b>ATP biosynthetic process (GO:0006754, P = 0.0032)</b> |                                                                                                                                                                                                              |                                                                                                                                                                                                                                                                                                                                                       |       |
| Cs5g08370                                                | K01535 H <sup>+</sup> -transporting ATPase [EC:3.6.3.6]   (RefSeq) ATPase 11, plasma membrane-type-like (A)                                                                                                  | ATPase 11, plasma membrane-type; EC=3.6.3.6; Proton pump 11 (At5g62670)                                                                                                                                                                                                                                                                               | 8.092 |
| Cs6g20790                                                | K09285 AP2-like factor, ANT lineage   (RefSeq) AP2-like ethylene-responsive transcription factor At1g16060 (A)                                                                                               | Ethylene-responsive transcription factor WRI1; Protein ACTIVATOR OF SPORAMIN::LUC 1; Protein WRINKLED 1 (At1g16060)                                                                                                                                                                                                                                   | 6.927 |
| Cs7g04300                                                | K09285 AP2-like factor, ANT lineage   (RefSeq) AP2-like ethylene-responsive transcription factor At1g16060 (A)                                                                                               | Ethylene-responsive transcription factor WRI1; Protein ACTIVATOR OF SPORAMIN::LUC 1; Protein WRINKLED 1 (At5g17430)                                                                                                                                                                                                                                   | 9.012 |
| Cs6g03440                                                | K01535 H <sup>+</sup> -transporting ATPase [EC:3.6.3.6]   (RefSeq) plasma membrane ATPase 1-like (A)                                                                                                         | Plasma membrane ATPase 1; EC=3.6.3.6; Proton pump 1 (At5g62670)                                                                                                                                                                                                                                                                                       | 3.613 |
| Cs6g03445                                                | K01535 H <sup>+</sup> -transporting ATPase [EC:3.6.3.6]   (RefSeq) ATPase 11, plasma membrane-type (A)                                                                                                       | ATPase 4, plasma membrane-type; EC=3.6.3.6; Proton pump 4 (At1g80660)                                                                                                                                                                                                                                                                                 | 3.771 |
| orange1.1t05835                                          | K00161 pyruvate dehydrogenase E1 component alpha subunit [EC:1.2.4.1]   (RefSeq) pyruvate dehydrogenase E1 component subunit alpha-3, chloroplastic (A)                                                      | Pyruvate dehydrogenase E1 component subunit alpha-3, chloroplastic; EC=1.2.4.1; Flags: Precursor (At1g01090)                                                                                                                                                                                                                                          | 2.430 |
| Cs6g03430                                                | K01535 H <sup>+</sup> -transporting ATPase [EC:3.6.3.6]   (RefSeq) plasma membrane ATPase 1-like (A)                                                                                                         | ATPase 7, plasma membrane-type; EC=3.6.3.6; Proton pump 7 (At3g60330)                                                                                                                                                                                                                                                                                 | 4.784 |
| Cs3g22480                                                | K00627 pyruvate dehydrogenase E2 component (dihydrolipoamide acetyltransferase) [EC:2.3.1.12]   (RefSeq) dihydrolipoamide acetyltransferase component 5 of pyruvate dehydrogenase complex, chloroplastic (A) | Dihydrolipoamide acetyltransferase component 5 of pyruvate dehydrogenase complex, chloroplastic; EC=2.3.1.12; Dihydrolipoamide S-acetyltransferase component 5 of pyruvate dehydrogenase complex; Protein EMBRYO DEFECTIVE 3003; Pyruvate dehydrogenase complex component E2 5; PDC-E2 5; PDCE2 5; Flags: Precursor (At1g34430)                       | 2.150 |
| Cs1g20200                                                | K00850 6-phosphofructokinase 1 [EC:2.7.1.11]   (RefSeq) ATP-dependent 6-phosphofructokinase 5, chloroplastic (A)                                                                                             | ATP-dependent 6-phosphofructokinase 5, chloroplastic {ECO:0000255 HAMAP-Rule:MF_03186}; ATP-PFK 5                                                                                                                                                                                                                                                     | 1.593 |

|           |                                                                                                                                                                                                                         |                                                                                                                                                                                                                                                                                                                   |        |
|-----------|-------------------------------------------------------------------------------------------------------------------------------------------------------------------------------------------------------------------------|-------------------------------------------------------------------------------------------------------------------------------------------------------------------------------------------------------------------------------------------------------------------------------------------------------------------|--------|
|           |                                                                                                                                                                                                                         | {ECO:0000255 HAMAP-Rule:MF_03186}; Phosphofructokinase 5 {ECO:0000255 HAMAP-Rule:MF_03186}; EC=2.7.1.11 {ECO:0000255 HAMAP-Rule:MF_03186}; Phosphohexokinase 5 {ECO:0000255 HAMAP-Rule:MF_03186}; Flags: Precursor (At2g22480)                                                                                    |        |
| Cs7g13170 | K00627 pyruvate dehydrogenase E2 component (dihydrolipoamide acetyltransferase) [EC:2.3.1.12]   (RefSeq) dihydrolipoyllysine-residue acetyltransferase component 4 of pyruvate dehydrogenase complex, chloroplastic (A) | Dihydrolipoyllysine-residue acetyltransferase component 4 of pyruvate dehydrogenase complex, chloroplastic; EC=2.3.1.12; Dihydrolipoamide S-acetyltransferase component 4 of pyruvate dehydrogenase complex; Pyruvate dehydrogenase complex component E2 4; PDC-E2 4; PDCE2 4; pIE2; Flags: Precursor (At3g25860) | 1.902  |
| Cs2g03260 | K00162 pyruvate dehydrogenase E1 component beta subunit [EC:1.2.4.1]   (RefSeq) pyruvate dehydrogenase E1 component subunit beta-3, chloroplastic-like (A)                                                              | Pyruvate dehydrogenase E1 component subunit beta-3, chloroplastic; EC=1.2.4.1; Flags: Precursor (At2g34590)                                                                                                                                                                                                       | 2.142  |
| Cs6g03420 | K01535 H <sup>+</sup> -transporting ATPase [EC:3.6.3.6]   (RefSeq) plasma membrane ATPase 1-like (A)                                                                                                                    | Plasma membrane ATPase 1; EC=3.6.3.6; Proton pump 1 (At5g62670)                                                                                                                                                                                                                                                   | 1.431  |
| Cs1g15840 | K00844 hexokinase [EC:2.7.1.1]   (RefSeq) hexokinase-1-like (A)                                                                                                                                                         | Hexokinase-1; EC=2.7.1.1; NtHxK1 (At4g29130)                                                                                                                                                                                                                                                                      | -2.510 |
| Cs7g26180 | K01689 enolase [EC:4.2.1.11]   (RefSeq) enolase 1, chloroplastic (A)                                                                                                                                                    | Enolase 1, chloroplastic; EC=4.2.1.11; 2-phospho-D-glycerate hydro-lyase 1; 2-phosphoglycerate dehydratase 1; Flags: Precursor (At1g74030)                                                                                                                                                                        | 1.238  |
| Cs1g15970 | K00850 6-phosphofructokinase 1 [EC:2.7.1.11]   (RefSeq) ATP-dependent 6-phosphofructokinase 3-like (A)                                                                                                                  | ATP-dependent 6-phosphofructokinase 3 {ECO:0000255 HAMAP-Rule:MF_03186}; ATP-PFK 3 {ECO:0000255 HAMAP-Rule:MF_03186}; Phosphofructokinase 3 {ECO:0000255 HAMAP-Rule:MF_03186}; EC=2.7.1.11 {ECO:0000255 HAMAP-Rule:MF_03186}; Phosphohexokinase 3 {ECO:0000255 HAMAP-Rule:MF_03186} (At4g29220)                   | 1.165  |
| Cs3g25560 | K02154 V-type H <sup>+</sup> -transporting ATPase subunit a   (RefSeq) V-type proton ATPase subunit a3 (A)                                                                                                              | V-type proton ATPase subunit a3; V-ATPase subunit a3; V-type proton ATPase 95 kDa subunit a isoform 3; V-ATPase 95 kDa isoform a3; Vacuolar H(+)-ATPase subunit a isoform 3; Vacuolar proton pump subunit a3; Vacuolar proton translocating ATPase 95 kDa subunit a isoform 3 (At4g39080)                         | 1.143  |
| Cs7g32500 | K01803 triosephosphate isomerase (TIM) [EC:5.3.1.1]   (RefSeq) triosephosphate isomerase, cytosolic (A)                                                                                                                 | Triosephosphate isomerase, cytosolic; TIM; Triose-phosphate isomerase; EC=5.3.1.1 (At3g55440)                                                                                                                                                                                                                     | -1.019 |
| Cs1g03320 | K01535 H <sup>+</sup> -transporting ATPase [EC:3.6.3.6]   (RefSeq) ATPase 11, plasma membrane-type (A)                                                                                                                  | Plasma membrane ATPase 1; EC=3.6.3.6; Proton pump 1 (At2g44850_2)                                                                                                                                                                                                                                                 | 1.049  |
| novel.818 | K00134 glyceraldehyde 3-phosphate dehydrogenase [EC:1.2.1.12]   (RefSeq) glyceraldehyde-3-phosphate dehydrogenase GAPC1, cytosolic (A)                                                                                  | Glyceraldehyde-3-phosphate dehydrogenase, cytosolic; EC=1.2.1.12; Flags: Fragment (At1g13440)                                                                                                                                                                                                                     | -1.068 |
| Cs8g06950 | K00162 pyruvate dehydrogenase E1 component beta subunit [EC:1.2.4.1]   (RefSeq) pyruvate dehydrogenase E1 component subunit beta-3, chloroplastic (A)                                                                   | Pyruvate dehydrogenase E1 component subunit beta-3, chloroplastic; EC=1.2.4.1; Flags: Precursor (At2g34590)                                                                                                                                                                                                       | 1.832  |

|                                                                                |                                                                                                                                                                                                              |                                                                                                                                                                                                                                                                                                                                                                             |        |
|--------------------------------------------------------------------------------|--------------------------------------------------------------------------------------------------------------------------------------------------------------------------------------------------------------|-----------------------------------------------------------------------------------------------------------------------------------------------------------------------------------------------------------------------------------------------------------------------------------------------------------------------------------------------------------------------------|--------|
| Cs5g01270                                                                      | K00161 pyruvate dehydrogenase E1 component alpha subunit [EC:1.2.4.1]   (RefSeq) pyruvate dehydrogenase E1 component subunit alpha-3, chloroplastic (A)                                                      | Pyruvate dehydrogenase E1 component subunit alpha-3, chloroplastic; EC=1.2.4.1; Flags: Precursor (At1g01090)                                                                                                                                                                                                                                                                | 1.356  |
| Cs4g18980                                                                      | K00850 6-phosphofructokinase 1 [EC:2.7.1.11]   (RefSeq) ATP-dependent 6-phosphofructokinase 6 (A)                                                                                                            | ATP-dependent 6-phosphofructokinase 3 {ECO:0000255 HAMAP-Rule:MF_03186}; ATP-PFK 3 {ECO:0000255 HAMAP-Rule:MF_03186}; Phosphofructokinase 3 {ECO:0000255 HAMAP-Rule:MF_03186}; EC=2.7.1.11 {ECO:0000255 HAMAP-Rule:MF_03186}; Phosphohexokinase 3 {ECO:0000255 HAMAP-Rule:MF_03186} (At4g32840)                                                                             | -2.038 |
| Cs3g26050                                                                      | K00844 hexokinase [EC:2.7.1.1]   (RefSeq) hexokinase-2, chloroplastic (A)                                                                                                                                    | Hexokinase-2, chloroplastic; EC=2.7.1.1; NtHxK2; Flags: Precursor (At1g47840)                                                                                                                                                                                                                                                                                               | 1.128  |
| <b>Generation of precursor metabolites and energy (GO:0006091, P = 0.7261)</b> |                                                                                                                                                                                                              |                                                                                                                                                                                                                                                                                                                                                                             |        |
| Cs6g20790                                                                      | K09285 AP2-like factor, ANT lineage   (RefSeq) AP2-like ethylene-responsive transcription factor At1g16060 (A)                                                                                               | Ethylene-responsive transcription factor WRI1; Protein ACTIVATOR OF SPORAMIN::LUC 1; Protein WRINKLED 1 (At1g16060)                                                                                                                                                                                                                                                         | 6.927  |
| Cs3g14590                                                                      | --                                                                                                                                                                                                           | Protein PHYLLLO, chloroplastic; Includes: Inactive isochorismate synthase; MENF; Includes: 2-succinyl-5-enolpyruvyl-6-hydroxy-3-cyclohexene-1-carboxylate synthase; EC=2.2.1.9; MEND; Includes: o-succinylbenzoate synthase; EC=4.2.1.113; MENC; Includes: 2-succinyl-6-hydroxy-2,4-cyclohexadiene-1-carboxylate synthase; EC=4.2.99.20; MENH; Flags: Precursor (At3g05600) | 3.596  |
| Cs7g04300                                                                      | K09285 AP2-like factor, ANT lineage   (RefSeq) AP2-like ethylene-responsive transcription factor At1g16060 (A)                                                                                               | Ethylene-responsive transcription factor WRI1; Protein ACTIVATOR OF SPORAMIN::LUC 1; Protein WRINKLED 1 (At5g17430)                                                                                                                                                                                                                                                         | 9.012  |
| orange1.1t05835                                                                | K00161 pyruvate dehydrogenase E1 component alpha subunit [EC:1.2.4.1]   (RefSeq) pyruvate dehydrogenase E1 component subunit alpha-3, chloroplastic (A)                                                      | Pyruvate dehydrogenase E1 component subunit alpha-3, chloroplastic; EC=1.2.4.1; Flags: Precursor (At1g01090)                                                                                                                                                                                                                                                                | 2.430  |
| Cs3g22480                                                                      | K00627 pyruvate dehydrogenase E2 component (dihydrolipoamide acetyltransferase) [EC:2.3.1.12]   (RefSeq) dihydrolipoamide acetyltransferase component 5 of pyruvate dehydrogenase complex, chloroplastic (A) | Dihydrolipoamide acetyltransferase component 5 of pyruvate dehydrogenase complex, chloroplastic; EC=2.3.1.12; Dihydrolipoamide S-acetyltransferase component 5 of pyruvate dehydrogenase complex; Protein EMBRYO DEFECTIVE 3003; Pyruvate dehydrogenase complex component E2 5; PDC-E2 5; PDCE2 5; Flags: Precursor (At1g34430)                                             | 2.150  |
| Cs1g20200                                                                      | K00850 6-phosphofructokinase 1 [EC:2.7.1.11]   (RefSeq) ATP-dependent 6-phosphofructokinase 5, chloroplastic (A)                                                                                             | ATP-dependent 6-phosphofructokinase 5, chloroplastic {ECO:0000255 HAMAP-Rule:MF_03186}; ATP-PFK 5 {ECO:0000255 HAMAP-Rule:MF_03186}; Phosphofructokinase 5 {ECO:0000255 HAMAP-Rule:MF_03186}; EC=2.7.1.11 {ECO:0000255 HAMAP-Rule:MF_03186}; Phosphohexokinase 5 {ECO:0000255 HAMAP-Rule:MF_03186}; Flags: Precursor (At2g22480)                                            | 1.593  |

|           |                                                                                                                                                                                                                                                                                              |                                                                                                                                                                                                                                                                                                                                                                            |        |
|-----------|----------------------------------------------------------------------------------------------------------------------------------------------------------------------------------------------------------------------------------------------------------------------------------------------|----------------------------------------------------------------------------------------------------------------------------------------------------------------------------------------------------------------------------------------------------------------------------------------------------------------------------------------------------------------------------|--------|
| Cs7g12250 | K14759 isochorismate synthase / 2-succinyl-5-enolpyruvyl-6-hydroxy-3-cyclohexene-1-carboxylate synthase / 2-succinyl-6-hydroxy-2,4-cyclohexadiene-1-carboxylate synthase / O-succinylbenzoate synthase [EC:5.4.4.2 2.2.1.9 4.2.99.20 4.2.1.113]   (RefSeq) protein PHYLLO, chloroplastic (A) | Protein PHYLLO, chloroplastic; Includes: Inactive isochorismate synthase; MENF; Includes: 2-succinyl-5-enolpyruvyl-6-hydroxy-3-cyclohexene-1-carboxylate synthase; EC=2.2.1.9; MEND; Includes: o-succinylbenzoate synthase; EC=4.2.1.113; MENC; Includes: 2-succinyl-6-hydroxy-2,4-cyclohexadiene-1-carboxylate synthase; EC=4.2.99.20; MENH; Flags: Precursor (At1g68890) | 1.367  |
| Cs3g06180 | K08909 light-harvesting complex I chlorophyll a/b binding protein 3   (RefSeq) chlorophyll a-b binding protein 8, chloroplastic (A)                                                                                                                                                          | Chlorophyll a-b binding protein 8, chloroplastic; LHCI type III CAB-8; Flags: Precursor (At1g61520)                                                                                                                                                                                                                                                                        | 8.126  |
| Cs7g13170 | K00627 pyruvate dehydrogenase E2 component (dihydrolipoamide acetyltransferase) [EC:2.3.1.12]   (RefSeq) dihydrolipoamide acetyltransferase component 4 of pyruvate dehydrogenase complex, chloroplastic (A)                                                                                 | Dihydrolipoamide acetyltransferase component 4 of pyruvate dehydrogenase complex, chloroplastic; EC=2.3.1.12; Dihydrolipoamide S-acetyltransferase component 4 of pyruvate dehydrogenase complex; Pyruvate dehydrogenase complex component E2 4; PDC-E2 4; PDCE2 4; pE2; Flags: Precursor (At3g25860)                                                                      | 1.902  |
| Cs2g03260 | K00162 pyruvate dehydrogenase E1 component beta subunit [EC:1.2.4.1]   (RefSeq) pyruvate dehydrogenase E1 component subunit beta-3, chloroplastic-like (A)                                                                                                                                   | Pyruvate dehydrogenase E1 component subunit beta-3, chloroplastic; EC=1.2.4.1; Flags: Precursor (At2g34590)                                                                                                                                                                                                                                                                | 2.142  |
| Cs5g26580 | K01792 glucose-6-phosphate 1-epimerase [EC:5.1.3.15]   (RefSeq) putative glucose-6-phosphate 1-epimerase (A)                                                                                                                                                                                 | Photosynthetic NDH subunit of subcomplex B 2, chloroplastic {ECO:0000303 PubMed:21785130}; Protein PnsB2 {ECO:0000303 PubMed:21785130}; NAD(P)H DEHYDROGENASE SUBUNIT 45 {ECO:0000303 PubMed:18974055}; NDH-DEPENDENT CYCLIC ELECTRON FLOW 2 {ECO:0000303 PubMed:18785996}; Flags: Precursor (At1g64770)                                                                   | 2.507  |
| Cs4g14980 | K14497 protein phosphatase 2C [EC:3.1.3.16]   (RefSeq) protein phosphatase 2C 77 (A)                                                                                                                                                                                                         | Protein phosphatase 2C 77; AtPP2C77; EC=3.1.3.16; Protein ABSCISIC ACID-INSENSITIVE 2; Protein phosphatase 2C ABI2; PP2C ABI2 (At5g57050)                                                                                                                                                                                                                                  | -1.030 |
| Cs2g15520 | K01595 phosphoenolpyruvate carboxylase [EC:4.1.1.31]   (RefSeq) phosphoenolpyruvate carboxylase 2 (A)                                                                                                                                                                                        | Phosphoenolpyruvate carboxylase 2; AtPPC2; PEPC 2; PEPCase 2; EC=4.1.1.31 (At3g14940)                                                                                                                                                                                                                                                                                      | -1.299 |
| Cs7g01640 |                                                                                                                                                                                                                                                                                              | Protein TAB2 homolog, chloroplastic {ECO:0000305}; Protein ATAB2 {ECO:0000303 PubMed:17139246}; Flags: Precursor (At3g08010)                                                                                                                                                                                                                                               | 1.272  |
| Cs1g15840 | K00844 hexokinase [EC:2.7.1.1]   (RefSeq) hexokinase-1-like (A)                                                                                                                                                                                                                              | Hexokinase-1; EC=2.7.1.1; NtHxK1 (At4g29130)                                                                                                                                                                                                                                                                                                                               | -2.510 |
| Cs9g03250 |                                                                                                                                                                                                                                                                                              | Protein MET1, chloroplastic {ECO:0000303 PubMed:25587003}; PDZ domain, K-box domain, and TPR region containing protein {ECO:0000303 PubMed:15914918}; Flags: Precursor (At1g55480)                                                                                                                                                                                         | 2.321  |
| Cs7g26180 | K01689 enolase [EC:4.2.1.11]   (RefSeq) enolase 1, chloroplastic (A)                                                                                                                                                                                                                         | Enolase 1, chloroplastic; EC=4.2.1.11; 2-phospho-D-glycerate hydro-lyase 1; 2-phosphoglycerate dehydratase 1; Flags: Precursor (At1g74030)                                                                                                                                                                                                                                 | 1.238  |
| Cs1g15970 | K00850 6-phosphofructokinase 1 [EC:2.7.1.11]   (RefSeq) ATP-dependent 6-phosphofructokinase 3-like (A)                                                                                                                                                                                       | ATP-dependent 6-phosphofructokinase 3 {ECO:0000255 HAMAP-Rule:MF_03186}; ATP-PFK 3 {ECO:0000255 HAMAP-Rule:MF_03186};                                                                                                                                                                                                                                                      | 1.165  |

|           |                                                                                                                                                                |                                                                                                                                                                                                                                                                                                 |        |
|-----------|----------------------------------------------------------------------------------------------------------------------------------------------------------------|-------------------------------------------------------------------------------------------------------------------------------------------------------------------------------------------------------------------------------------------------------------------------------------------------|--------|
|           |                                                                                                                                                                | Phosphofructokinase 3 {ECO:0000255 HAMAP-Rule:MF_03186}; EC=2.7.1.11 {ECO:0000255 HAMAP-Rule:MF_03186}; Phosphohexokinase 3 {ECO:0000255 HAMAP-Rule:MF_03186} (At4g29220)                                                                                                                       |        |
| Cs5g19740 | K08669 HtrA serine peptidase 2 [EC:3.4.21.108]   (RefSeq) putative protease Do-like 14 isoform X2 (A)                                                          | Protease Do-like 1, chloroplastic; EC=3.4.21.-; Protein DEGRADATION OF PERIPLASMIC PROTEINS 1; DEGP PROTEASE 1; Flags: Precursor (At3g27925)                                                                                                                                                    | 2.388  |
| Cs7g32500 | K01803 triosephosphate isomerase (TIM) [EC:5.3.1.1]   (RefSeq) triosephosphate isomerase, cytosolic (A)                                                        | Triosephosphate isomerase, cytosolic; TIM; Triose-phosphate isomerase; EC=5.3.1.1 (At3g55440)                                                                                                                                                                                                   | -1.019 |
| novel.818 | K00134 glyceraldehyde 3-phosphate dehydrogenase [EC:1.2.1.12]   (RefSeq) glyceraldehyde-3-phosphate dehydrogenase GAPC1, cytosolic (A)                         | Glyceraldehyde-3-phosphate dehydrogenase, cytosolic; EC=1.2.1.12; Flags: Fragment (At1g13440)                                                                                                                                                                                                   | -1.068 |
| Cs8g06950 | K00162 pyruvate dehydrogenase E1 component beta subunit [EC:1.2.4.1]   (RefSeq) pyruvate dehydrogenase E1 component subunit beta-3, chloroplastic (A)          | Pyruvate dehydrogenase E1 component subunit beta-3, chloroplastic; EC=1.2.4.1; Flags: Precursor (At2g34590)                                                                                                                                                                                     | 1.832  |
| Cs5g01270 | K00161 pyruvate dehydrogenase E1 component alpha subunit [EC:1.2.4.1]   (RefSeq) pyruvate dehydrogenase E1 component subunit alpha-3, chloroplastic (A)        | Pyruvate dehydrogenase E1 component subunit alpha-3, chloroplastic; EC=1.2.4.1; Flags: Precursor (At1g01090)                                                                                                                                                                                    | 1.356  |
| Cs4g07650 | K08905 photosystem I subunit V   (RefSeq) photosystem I reaction center subunit V, chloroplastic (A)                                                           | Photosystem I reaction center subunit V, chloroplastic; PSI-G; Flags: Precursor (At1g55670)                                                                                                                                                                                                     | 2.043  |
| Cs4g18980 | K00850 6-phosphofructokinase 1 [EC:2.7.1.11]   (RefSeq) ATP-dependent 6-phosphofructokinase 6 (A)                                                              | ATP-dependent 6-phosphofructokinase 3 {ECO:0000255 HAMAP-Rule:MF_03186}; ATP-PFK 3 {ECO:0000255 HAMAP-Rule:MF_03186}; Phosphofructokinase 3 {ECO:0000255 HAMAP-Rule:MF_03186}; EC=2.7.1.11 {ECO:0000255 HAMAP-Rule:MF_03186}; Phosphohexokinase 3 {ECO:0000255 HAMAP-Rule:MF_03186} (At4g32840) | -2.038 |
| Cs1g03610 | K00025 malate dehydrogenase [EC:1.1.1.37]   (RefSeq) malate dehydrogenase, cytoplasmic-like (A)                                                                | Malate dehydrogenase, cytoplasmic {ECO:0000303 Ref.1}; EC=1.1.1.37 {ECO:0000269 PubMed:23313174} (At1g04410)                                                                                                                                                                                    | 1.196  |
| Cs7g10740 | K08908 light-harvesting complex I chlorophyll a/b binding protein 2   (RefSeq) chlorophyll a-b binding protein, chloroplastic (A)                              | Chlorophyll a-b binding protein, chloroplastic; LHCI type II CAB; Flags: Precursor (At3g61470)                                                                                                                                                                                                  | -1.712 |
| Cs3g26050 | K00844 hexokinase [EC:2.7.1.1]   (RefSeq) hexokinase-2, chloroplastic (A)                                                                                      | Hexokinase-2, chloroplastic; EC=2.7.1.1; NtHxK2; Flags: Precursor (At1g47840)                                                                                                                                                                                                                   | 1.128  |
| Cs2g18800 | K00975 glucose-1-phosphate adenyltransferase [EC:2.7.7.27]   (RefSeq) SB1, glgC; glucose-1-phosphate adenyltransferase small subunit 2, chloroplastic-like (A) | Glucose-1-phosphate adenyltransferase small subunit 2, chloroplastic; EC=2.7.7.27; ADP-glucose pyrophosphorylase; ADP-glucose synthase; AGPase B; Alpha-D-glucose-1-phosphate adenyl transferase; Flags: Precursor (At5g48300)                                                                  | 1.281  |
| Cs8g07230 | K00975 glucose-1-phosphate adenyltransferase [EC:2.7.7.27]   (RefSeq) glgC; glucose-1-phosphate adenyltransferase large subunit 1-like (A)                     | Glucose-1-phosphate adenyltransferase large subunit 1; EC=2.7.7.27; ADP-glucose pyrophosphorylase; ADP-glucose synthase; AGPase S; Alpha-D-glucose-1-phosphate adenyl transferase; Flags: Fragment (At4g39210)                                                                                  | 1.598  |

|                                                                     |                                                                                                            |                                                                                                                                                                                                                                                     |                            |
|---------------------------------------------------------------------|------------------------------------------------------------------------------------------------------------|-----------------------------------------------------------------------------------------------------------------------------------------------------------------------------------------------------------------------------------------------------|----------------------------|
| Cs5g02810                                                           | K23541 Ca <sup>2+</sup> /H <sup>+</sup> antiporter, TMEM165/GDT1 family   (RefSeq) GDT1-like protein 3 (A) | Protein PAM71, chloroplastic {ECO:0000303 PubMed:27020959}; CA(2+)/H(+) ANTIporter 1 {ECO:0000303 PubMed:27302341}; GDT1-like protein 1 {ECO:0000305}; PHOTOSYNTHESIS AFFECTED MUTANT71 {ECO:0000303 PubMed:27020959}; Flags: Precursor (At1g64150) | 2.111                      |
| Cs5g06930                                                           | K01638 malate synthase [EC:2.3.3.9]   (RefSeq) malate synthase, glyoxysomal (A)                            | Malate synthase, glyoxysomal; EC=2.3.3.9 (At5g03860)                                                                                                                                                                                                | -1.677                     |
|                                                                     |                                                                                                            |                                                                                                                                                                                                                                                     |                            |
| <b>Index</b>                                                        | <b>Compounds</b>                                                                                           |                                                                                                                                                                                                                                                     | <b>Log<sub>2</sub>(FC)</b> |
| <b><i>Carbon metabolism (ko01200, P = 0.2374)</i></b>               |                                                                                                            |                                                                                                                                                                                                                                                     |                            |
| pme3311                                                             | D-Fructose-1,6-biphosphate                                                                                 |                                                                                                                                                                                                                                                     | 1.177                      |
| Lmgn000219                                                          | Succinic semialdehyde                                                                                      |                                                                                                                                                                                                                                                     | 1.107                      |
| pme2380                                                             | α-Ketoglutaric acid                                                                                        |                                                                                                                                                                                                                                                     | 1.177                      |
| mws2125                                                             | Phosphoenolpyruvate                                                                                        |                                                                                                                                                                                                                                                     | 2.249                      |
| pme0010                                                             | L-Serine                                                                                                   |                                                                                                                                                                                                                                                     | 2.086                      |
| pme0014                                                             | L-Glutamic acid                                                                                            |                                                                                                                                                                                                                                                     | 1.760                      |
| pme1987                                                             | L-Alanine                                                                                                  |                                                                                                                                                                                                                                                     | -1.018                     |
| pme0195                                                             | L-Cysteine                                                                                                 |                                                                                                                                                                                                                                                     | -13.209                    |
| mws1050                                                             | O-Acetylserine                                                                                             |                                                                                                                                                                                                                                                     | 1.086                      |
| Zmzn000078                                                          | Dihydroxyacetone phosphate                                                                                 |                                                                                                                                                                                                                                                     | 1.339                      |
| pme0534                                                             | Gluconic acid                                                                                              |                                                                                                                                                                                                                                                     | 1.360                      |
|                                                                     |                                                                                                            |                                                                                                                                                                                                                                                     |                            |
| <b><i>Starch and sucrose metabolism (ko00500, P = 0.8522)</i></b>   |                                                                                                            |                                                                                                                                                                                                                                                     |                            |
| mws4170                                                             | D-Glucose                                                                                                  |                                                                                                                                                                                                                                                     | -1.009                     |
| Zmyn000083                                                          | D-Glucose 1,6-bisphosphate                                                                                 |                                                                                                                                                                                                                                                     | 2.623                      |
|                                                                     |                                                                                                            |                                                                                                                                                                                                                                                     |                            |
| <b><i>Fructose and mannose metabolism (ko00051, P = 0.5288)</i></b> |                                                                                                            |                                                                                                                                                                                                                                                     |                            |
| pmf0138                                                             | D-Mannose                                                                                                  |                                                                                                                                                                                                                                                     | -1.564                     |
| Zmzn000078                                                          | Dihydroxyacetone phosphate                                                                                 |                                                                                                                                                                                                                                                     | 1.339                      |
|                                                                     |                                                                                                            |                                                                                                                                                                                                                                                     |                            |
| <b><i>Galactose metabolism (ko00052, P = 0.7072)</i></b>            |                                                                                                            |                                                                                                                                                                                                                                                     |                            |
| pmf0138                                                             | D-Mannose                                                                                                  |                                                                                                                                                                                                                                                     | -1.564                     |
| mws4170                                                             | D-Glucose                                                                                                  |                                                                                                                                                                                                                                                     | -1.009                     |
| Zmzn000078                                                          | Dihydroxyacetone phosphate                                                                                 |                                                                                                                                                                                                                                                     | 1.339                      |
| pmf0139                                                             | D-Galactose                                                                                                |                                                                                                                                                                                                                                                     | -1.113                     |

|                                                                  |                                |  |        |
|------------------------------------------------------------------|--------------------------------|--|--------|
| pme0516                                                          | Inositol                       |  | 1.657  |
| <b><i>Citrate cycle (TCA cycle) (ko00020, P = 0.7986)</i></b>    |                                |  |        |
| mws2125                                                          | Phosphoenolpyruvate            |  | 2.249  |
| pme2380                                                          | $\alpha$ -Ketoglutaric acid    |  | 1.177  |
| <b><i>Pyruvate metabolism (ko00620, P = 0.9397)</i></b>          |                                |  |        |
| mws2125                                                          | Phosphoenolpyruvate            |  | 2.249  |
| <b><i>Glycolysis / Gluconeogenesis (ko00010, P = 0.4162)</i></b> |                                |  |        |
| mws2125                                                          | Phosphoenolpyruvate            |  | 2.249  |
| mws4170                                                          | D-Glucose                      |  | -1.009 |
| Zmzn000078                                                       | Dihydroxyacetone phosphate     |  | 1.339  |
| <b><i>Pentose phosphate pathway (ko00030, P = 0.4251)</i></b>    |                                |  |        |
| mws0863                                                          | 2-Deoxyribose-5'-phosphate     |  | 1.108  |
| pmb2507                                                          | 2-Deoxyribose-1-phosphate      |  | 4.256  |
| mws4170                                                          | D-Glucose                      |  | -1.009 |
| pme0534                                                          | Gluconic acid                  |  | 1.360  |
| <b><i>Oxidative phosphorylation (ko00190, P = 0.8645)</i></b>    |                                |  |        |
| MWS5083                                                          | Flavin single nucleotide (FMN) |  | 1.075  |

**Table S13.** DEGs and DAMs related to lipid metabolism in RN0

| Accession No.                                        | KEGG annotation                                                                                                                                                                       | Swissprot annotation (KOG)                                                                                                                                                                                | Log <sub>2</sub> (FC) |
|------------------------------------------------------|---------------------------------------------------------------------------------------------------------------------------------------------------------------------------------------|-----------------------------------------------------------------------------------------------------------------------------------------------------------------------------------------------------------|-----------------------|
| <b>Fatty acid biosynthesis (ko00061, P = 0.0001)</b> |                                                                                                                                                                                       |                                                                                                                                                                                                           |                       |
| Cs1g22910                                            | K00059 3-oxoacyl-[acyl-carrier protein] reductase [EC:1.1.1.100]   (RefSeq) short-chain type dehydrogenase/reductase-like (A)                                                         | NADPH-dependent aldehyde reductase-like protein, chloroplastic {ECO:0000250 UniProtKB:Q9SQR2}; EC=1.1.1.- {ECO:0000250 UniProtKB:Q9SQR2}; Flags: Precursor (At3g50560)                                    | 2.950                 |
| Cs7g10260                                            | K00059 3-oxoacyl-[acyl-carrier protein] reductase [EC:1.1.1.100]   (RefSeq) 3-oxoacyl-[acyl-carrier-protein] reductase 4 (A)                                                          | 3-oxoacyl-[acyl-carrier-protein] reductase, chloroplastic; EC=1.1.1.100; 3-ketoacyl-acyl carrier protein reductase; Flags: Precursor (At1g24360)                                                          | 2.622                 |
| orange1.1t02015                                      | K00208 enoyl-[acyl-carrier protein] reductase I [EC:1.3.1.9 1.3.1.10]   (RefSeq) enoyl-[acyl-carrier-protein] reductase [NADH], chloroplastic (A)                                     | Enoyl-[acyl-carrier-protein] reductase [NADH], chloroplastic; ENR; EC=1.3.1.9; NADH-dependent enoyl-ACP reductase 1; Protein MOSAIC DEATH 1; Flags: Precursor (At2g05990)                                 | 2.201                 |
| novel.1941                                           | K00208 enoyl-[acyl-carrier protein] reductase I [EC:1.3.1.9 1.3.1.10]   (RefSeq) enoyl-[acyl-carrier-protein] reductase [NADH], chloroplastic (A)                                     | Enoyl-[acyl-carrier-protein] reductase [NADH], chloroplastic; EC=1.3.1.9; NADH-dependent enoyl-ACP reductase; Flags: Precursor (At2g05990)                                                                | 9.786                 |
| Cs8g20810                                            | K00645 [acyl-carrier-protein] S-malonyltransferase [EC:2.3.1.39]   (RefSeq) malonyl CoA-acyl carrier protein transacylase (A)                                                         | (At2g30200)                                                                                                                                                                                               | 2.183                 |
| Cs5g09160                                            | K00648 3-oxoacyl-[acyl-carrier-protein] synthase III [EC:2.3.1.180]   (RefSeq) 3-oxoacyl-[acyl-carrier-protein] synthase III, chloroplastic (A)                                       | 3-oxoacyl-[acyl-carrier-protein] synthase III, chloroplastic; EC=2.3.1.180; Beta-ketoacyl-ACP synthase III; KAS III; Flags: Precursor (At1g62640)                                                         | 1.120                 |
| Cs5g09170                                            | K00648 3-oxoacyl-[acyl-carrier-protein] synthase III [EC:2.3.1.180]   (RefSeq) 3-oxoacyl-[acyl-carrier-protein] synthase III, chloroplastic (A)                                       | 3-oxoacyl-[acyl-carrier-protein] synthase 3 A, chloroplastic; EC=2.3.1.180; 3-oxoacyl-[acyl-carrier-protein] synthase III A; Beta-ketoacyl-ACP synthase III A; KAS III A; Flags: Precursor (At1g62640)    | 1.218                 |
| Cs3g19600                                            | K01897 long-chain acyl-CoA synthetase [EC:6.2.1.3]   (RefSeq) long chain acyl-CoA synthetase 9, chloroplastic (A)                                                                     | Long chain acyl-CoA synthetase 9, chloroplastic; EC=6.2.1.3 (At1g77590)                                                                                                                                   | 3.035                 |
| orange1.1t01720                                      | K01897 long-chain acyl-CoA synthetase [EC:6.2.1.3]   (RefSeq) long chain acyl-CoA synthetase 1 (A)                                                                                    | Long chain acyl-CoA synthetase 1; EC=6.2.1.3; Protein ECERIFERUM 8 (At2g47240)                                                                                                                            | -3.137                |
| orange1.1t01869                                      | K01897 long-chain acyl-CoA synthetase [EC:6.2.1.3]   (RefSeq) probable acyl-activating enzyme 16, chloroplastic (A)                                                                   | Probable acyl-activating enzyme 16, chloroplastic; EC=6.2.1.-; Flags: Precursor (At4g14070)                                                                                                               | 1.284                 |
| Cs4g04540                                            | K01961 acetyl-CoA carboxylase, biotin carboxylase subunit [EC:6.4.1.2 6.3.4.14]   (RefSeq) biotin carboxylase 2, chloroplastic (A)                                                    | Biotin carboxylase 2, chloroplastic; EC=6.3.4.14; Acetyl-CoA carboxylase subunit A 2; ACC; EC=6.4.1.2; Flags: Precursor (At5g35360)                                                                       | 2.293                 |
| Cs6g07610                                            | K01962 acetyl-CoA carboxylase carboxyl transferase subunit alpha [EC:6.4.1.2 2.1.3.15]   (RefSeq) acetyl-coenzyme A carboxylase carboxyl transferase subunit alpha, chloroplastic (A) | Acetyl-coenzyme A carboxylase carboxyl transferase subunit alpha, chloroplastic; ACCase subunit alpha; Acetyl-CoA carboxylase carboxyltransferase subunit alpha; EC=6.4.1.2; Flags: Precursor (At2g38040) | 2.188                 |

|                                                                   |                                                                                                                                                                     |                                                                                                                                                                                                                                                                            |        |
|-------------------------------------------------------------------|---------------------------------------------------------------------------------------------------------------------------------------------------------------------|----------------------------------------------------------------------------------------------------------------------------------------------------------------------------------------------------------------------------------------------------------------------------|--------|
| Cs6g02920                                                         | K02160 acetyl-CoA carboxylase biotin carboxyl carrier protein   (RefSeq) biotin carboxyl carrier protein of acetyl-CoA carboxylase, chloroplastic (A)               | Biotin carboxyl carrier protein of acetyl-CoA carboxylase, chloroplastic; BCCP; Flags: Precursor (At5g16390)                                                                                                                                                               | 1.749  |
| Cs6g22090                                                         | K02160 acetyl-CoA carboxylase biotin carboxyl carrier protein   (RefSeq) biotin carboxyl carrier protein of acetyl-CoA carboxylase 2, chloroplastic (A)             | Biotin carboxyl carrier protein of acetyl-CoA carboxylase 2, chloroplastic; AtBCCP2; BCCP-2; Flags: Precursor (At5g15530)                                                                                                                                                  | 3.136  |
| orange1.1t01990                                                   | K02372 3-hydroxyacyl-[acyl-carrier-protein] dehydratase [EC:4.2.1.59]   (RefSeq) 3-hydroxyacyl-[acyl-carrier-protein] dehydratase FabZ-like (A)                     | (At5g10160)                                                                                                                                                                                                                                                                | 1.613  |
| Cs3g15530                                                         | K03921 acyl-[acyl-carrier-protein] desaturase [EC:1.14.19.2 1.14.19.11 1.14.19.26]   (RefSeq) stearyl-[acyl-carrier-protein] 9-desaturase 5, chloroplastic-like (A) | Stearyl-[acyl-carrier-protein] 9-desaturase 5, chloroplastic; Stearyl-ACP desaturase 5; EC=1.14.19.2 {ECO:0000269 PubMed:17072561}; Acyl-[acyl-carrier-protein] desaturase 5; Flags: Precursor (At3g02630)                                                                 | -1.524 |
| Cs1g16920                                                         | K09458 3-oxoacyl-[acyl-carrier-protein] synthase II [EC:2.3.1.179]   (RefSeq) 3-oxoacyl-[acyl-carrier-protein] synthase II, chloroplastic-like (A)                  | 3-oxoacyl-[acyl-carrier-protein] synthase II, chloroplastic; EC=2.3.1.41; Beta-ketoacyl-acyl-carrier-protein synthase II; AtKAS2; Beta-ketoacyl-ACP synthetase 2; Protein FATTY ACID BIOSYNTHESIS 1; Flags: Precursor (At1g74960)                                          | 7.148  |
| Cs1g17040                                                         | K09458 3-oxoacyl-[acyl-carrier-protein] synthase II [EC:2.3.1.179]   (RefSeq) 3-oxoacyl-[acyl-carrier-protein] synthase II, chloroplastic-like (A)                  | 3-oxoacyl-[acyl-carrier-protein] synthase II, chloroplastic; EC=2.3.1.41; Beta-ketoacyl-acyl-carrier-protein synthase II; AtKAS2; Beta-ketoacyl-ACP synthetase 2; Protein FATTY ACID BIOSYNTHESIS 1; Flags: Precursor (At1g74960)                                          | 6.988  |
| Cs1g17070                                                         | K09458 3-oxoacyl-[acyl-carrier-protein] synthase II [EC:2.3.1.179]   (RefSeq) 3-oxoacyl-[acyl-carrier-protein] synthase II, chloroplastic-like (A)                  | 3-oxoacyl-[acyl-carrier-protein] synthase II, chloroplastic; EC=2.3.1.41; Beta-ketoacyl-acyl-carrier-protein synthase II; AtKAS2; Beta-ketoacyl-ACP synthetase 2; Protein FATTY ACID BIOSYNTHESIS 1; Flags: Precursor (At1g74960)                                          | 7.704  |
| Cs5g01990                                                         | K09458 3-oxoacyl-[acyl-carrier-protein] synthase II [EC:2.3.1.179]   (RefSeq) 3-oxoacyl-[acyl-carrier-protein] synthase I, chloroplastic-like (A)                   | 3-oxoacyl-[acyl-carrier-protein] synthase I, chloroplastic; EC=2.3.1.41; Beta-ketoacyl-ACP synthase I; KAS I; Flags: Precursor (At5g46290)                                                                                                                                 | 7.925  |
| Cs2g13450                                                         | K10781 fatty acyl-ACP thioesterase B [EC:3.1.2.14 3.1.2.21]   (RefSeq) FATB; acyl-ACP-thioesterase B (A)                                                            | Palmitoyl-acyl carrier protein thioesterase, chloroplastic; EC=3.1.2.-; 16:0-acyl-carrier protein thioesterase; 16:0-ACP thioesterase; Acyl-[acyl-carrier-protein] hydrolase; PATE; Flags: Precursor (At1g08510)                                                           | 6.270  |
|                                                                   |                                                                                                                                                                     |                                                                                                                                                                                                                                                                            |        |
| <b>Phospholipid biosynthetic process (GO:0008654, P = 0.9474)</b> |                                                                                                                                                                     |                                                                                                                                                                                                                                                                            |        |
| Cs6g20410                                                         | K13508 glycerol-3-phosphate acyltransferase [EC:2.3.1.15 2.3.1.198]   (RefSeq) glycerol-3-phosphate 2-O-acyltransferase 6 (A)                                       | Glycerol-3-phosphate 2-O-acyltransferase 6; AtGPAT6; EC=2.3.1.198; Glycerol-3-phosphate acyltransferase 6 (At2g38110)                                                                                                                                                      | 12.480 |
| Cs7g04640                                                         | K13508 glycerol-3-phosphate acyltransferase [EC:2.3.1.15 2.3.1.198]   (RefSeq) glycerol-3-phosphate 2-O-acyltransferase 6 (A)                                       | Glycerol-3-phosphate 2-O-acyltransferase 6; AtGPAT6; EC=2.3.1.198; Glycerol-3-phosphate acyltransferase 6 (At2g38110)                                                                                                                                                      | 11.836 |
| Cs6g17490                                                         | K13789 geranylgeranyl diphosphate synthase, type II [EC:2.5.1.1 2.5.1.10 2.5.1.29]   (RefSeq) geranylgeranyl pyrophosphate synthase 7, chloroplastic-like (A)       | Heterodimeric geranylgeranyl pyrophosphate synthase large subunit 1, chloroplastic; GGPP synthase 1; GGPS1; EC=2.5.1.-; (2E,6E)-farnesyl diphosphate synthase 1; Dimethylallyltranstransferase 1; EC=2.5.1.1; Farnesyl diphosphate synthase 1; Farnesyltranstransferase 1; | 3.885  |

|                                                                              |                                                                                                                                                             |                                                                                                                                                                                                                                                                                                                   |        |
|------------------------------------------------------------------------------|-------------------------------------------------------------------------------------------------------------------------------------------------------------|-------------------------------------------------------------------------------------------------------------------------------------------------------------------------------------------------------------------------------------------------------------------------------------------------------------------|--------|
|                                                                              |                                                                                                                                                             | EC=2.5.1.29; Geranyltranstransferase 1; EC=2.5.1.10; Flags: Precursor (At4g36810)                                                                                                                                                                                                                                 |        |
| Cs5g27560                                                                    | K09517 DnaJ homolog subfamily B member 11   (RefSeq) dnaJ protein ERDJ3B (A)                                                                                | Chaperone protein dnaJ 20, chloroplastic; AtDjC20; AtJ20; Flags: Precursor (At4g13830)                                                                                                                                                                                                                            | 1.144  |
| Cs3g14760                                                                    | K01115 phospholipase D1/2 [EC:3.1.4.4]   (RefSeq) phospholipase D zeta 1 (A)                                                                                | Phospholipase D zeta 1 {ECO:0000303 PubMed:11891260}; PLDzeta1 {ECO:0000303 PubMed:11891260}; EC=3.1.4.4 {ECO:0000269 PubMed:11891260}; Phospholipase D p1; AtPLDp1; Phospholipase D1 PHOX and PX-containing domain protein (At3g05630)                                                                           | 3.732  |
| orange1.1t00081                                                              | K05929 phosphoethanolamine N-methyltransferase [EC:2.1.1.103]   (RefSeq) phosphoethanolamine N-methyltransferase 1-like (A)                                 | Phosphoethanolamine N-methyltransferase 1; AtNMT1; PEAMT 1; EC=2.1.1.103; Protein XIPTOL 1 (At1g48600)                                                                                                                                                                                                            | -3.710 |
| Cs1g16750                                                                    | K21797 phosphatidylinositol 4-phosphatase [EC:3.1.3.-]   (RefSeq) phosphoinositide phosphatase SAC6 (A)                                                     | Phosphoinositide phosphatase SAC2; AtSAC2; EC=3.1.3.-; Phosphatidylinositol 3,5-bisphosphate 5-phosphatase SAC2; Protein SUPPRESSOR OF ACTIN 2; SAC domain protein 2 (At3g43220)                                                                                                                                  | 1.234  |
| Cs8g06970                                                                    | K13513 lysocardiolipin and lysophospholipid acyltransferase [EC:2.3.1.-2.3.1.51]   (RefSeq) probable 1-acyl-sn-glycerol-3-phosphate acyltransferase 5 (A)   | Probable 1-acyl-sn-glycerol-3-phosphate acyltransferase 5; EC=2.3.1.51; Lysophosphatidyl acyltransferase 5 (At3g18850)                                                                                                                                                                                            | -3.028 |
| orange1.1t03552                                                              | K01613 phosphatidylserine decarboxylase [EC:4.1.1.65]   (RefSeq) phosphatidylserine decarboxylase proenzyme 2-like (A)                                      | Phosphatidylserine decarboxylase proenzyme 2; EC=4.1.1.65 {ECO:0000255 HAMAP-Rule:MF_03209}; Contains: Phosphatidylserine decarboxylase 2 beta chain; Contains: Phosphatidylserine decarboxylase 2 alpha chain (At5g57190)                                                                                        | 1.078  |
| Cs9g13270                                                                    | K00999 CDP-diacylglycerol--inositol 3-phosphatidyltransferase [EC:2.7.8.11]   (RefSeq) CDP-diacylglycerol--inositol 3-phosphatidyltransferase 1-like (A)    | CDP-diacylglycerol--inositol 3-phosphatidyltransferase 1; EC=2.7.8.11; Phosphatidylinositol synthase 1; AtPIS1; PI synthase 1; PtdIns synthase 1 (At1g68000)                                                                                                                                                      | 1.627  |
| Cs5g19180                                                                    | K03860 phosphatidylinositol glycan, class Q   (RefSeq) phosphatidylinositol N-acetylglucosaminyltransferase subunit GPI1-like (A)                           | (At3g57170)                                                                                                                                                                                                                                                                                                       | 1.663  |
| Cs1g01700                                                                    | K01858 myo-inositol-1-phosphate synthase [EC:5.5.1.4]   (RefSeq) inositol-3-phosphate synthase (A)                                                          | Inositol-3-phosphate synthase; MIP synthase; EC=5.5.1.4; Myo-inositol 1-phosphate synthase; IPS; MI-1-P synthase (At2g22240)                                                                                                                                                                                      | -1.646 |
| Cs3g03640                                                                    | K13789 geranylgeranyl diphosphate synthase, type II [EC:2.5.1.1 2.5.1.10 2.5.1.29]   (RefSeq) geranylgeranyl pyrophosphate synthase, chloroplastic-like (A) | Geranylgeranyl pyrophosphate synthase, chloroplastic; GGPP synthase; GGPS; EC=2.5.1.-; (2E,6E)-farnesyl diphosphate synthase; Dimethylallyltranstransferase; EC=2.5.1.1; Farnesyl diphosphate synthase; Farnesyltranstransferase; EC=2.5.1.29; Geranyltranstransferase; EC=2.5.1.10; Flags: Precursor (At4g36810) | -1.828 |
|                                                                              |                                                                                                                                                             |                                                                                                                                                                                                                                                                                                                   |        |
| <b>Glycosphingolipid biosynthesis - ganglio series (ko00604, P = 0.0014)</b> |                                                                                                                                                             |                                                                                                                                                                                                                                                                                                                   |        |

|                                                                                                |                                                                                                                                         |                                                                                                                                                                                   |        |
|------------------------------------------------------------------------------------------------|-----------------------------------------------------------------------------------------------------------------------------------------|-----------------------------------------------------------------------------------------------------------------------------------------------------------------------------------|--------|
| Cs1g08380                                                                                      | K12309 beta-galactosidase [EC:3.2.1.23]   (RefSeq) beta-galactosidase 17 (A)                                                            | Beta-galactosidase 10; Lactase 10; EC=3.2.1.23; Flags: Precursor (At5g63810)                                                                                                      | -1.013 |
| Cs1g18300                                                                                      | K12309 beta-galactosidase [EC:3.2.1.23]   (RefSeq) beta-galactosidase 17 (A)                                                            | Beta-galactosidase 1; Lactase 1; EC=3.2.1.23; Flags: Precursor (At3g13750)                                                                                                        | -1.750 |
| Cs1g24730                                                                                      | K12309 beta-galactosidase [EC:3.2.1.23]   (RefSeq) beta-galactosidase 17 (A)                                                            | Beta-galactosidase 3; Lactase 3; EC=3.2.1.23; Flags: Precursor (At4g36360)                                                                                                        | -1.955 |
| Cs2g06700                                                                                      | K12309 beta-galactosidase [EC:3.2.1.23]   (RefSeq) beta-galactosidase 17 (A)                                                            | Beta-galactosidase 8; Lactase 8; EC=3.2.1.23; Protein AR782; Flags: Precursor (At2g28470)                                                                                         | 5.343  |
| Cs3g25410                                                                                      | K12309 beta-galactosidase [EC:3.2.1.23]   (RefSeq) beta-galactosidase 17 (A)                                                            | Beta-galactosidase 5; Lactase 5; EC=3.2.1.23; Flags: Precursor (At4g36360)                                                                                                        | -2.795 |
| Cs4g14090                                                                                      | K12309 beta-galactosidase [EC:3.2.1.23]   (RefSeq) beta-galactosidase 17 (A)                                                            | Beta-galactosidase; EC=3.2.1.23; Acid beta-galactosidase; Lactase; Exo-(1->4)-beta-D-galactanase; Flags: Precursor (At4g26140)                                                    | -1.397 |
| Cs5g17540                                                                                      | K12309 beta-galactosidase [EC:3.2.1.23]   (RefSeq) beta-galactosidase 17 (A)                                                            | Beta-galactosidase 16; Lactase 16; EC=3.2.1.23; Flags: Precursor (At1g77410)                                                                                                      | 5.369  |
| Cs8g16800                                                                                      | K12309 beta-galactosidase [EC:3.2.1.23]   (RefSeq) beta-galactosidase 17 (A)                                                            | Beta-galactosidase 8; Lactase 8; EC=3.2.1.23; Protein AR782; Flags: Precursor (At2g28470)                                                                                         | -1.961 |
| Cs2g12170                                                                                      | K12373 hexosaminidase [EC:3.2.1.52]   (RefSeq) beta-hexosaminidase 3 (A)                                                                | Beta-hexosaminidase 3; EC=3.2.1.52; Beta-GlcNAcase 3; Beta-N-acetylhexosaminidase 3; Beta-hexosaminidase 1; AtHEX1; N-acetyl-beta-glucosaminidase 3; Flags: Precursor (At3g55260) | -1.643 |
| Cs7g01060                                                                                      | K12373 hexosaminidase [EC:3.2.1.52]   (RefSeq) beta-hexosaminidase 2-like (A)                                                           | Beta-hexosaminidase 2; EC=3.2.1.52; Beta-GlcNAcase 2; Beta-N-acetylhexosaminidase 2; Beta-hexosaminidase 3; AtHEX3; N-acetyl-beta-glucosaminidase 2; Flags: Precursor (At1g05590) | 5.606  |
| orange1.1t02147                                                                                | K12373 hexosaminidase [EC:3.2.1.52]   (RefSeq) beta-hexosaminidase 2-like (A)                                                           | Beta-hexosaminidase 2; EC=3.2.1.52; Beta-GlcNAcase 2; Beta-N-acetylhexosaminidase 2; Beta-hexosaminidase 3; AtHEX3; N-acetyl-beta-glucosaminidase 2; Flags: Precursor (At1g05590) | 2.126  |
| <b><i>Glycosphingolipid biosynthesis - lacto and neolacto series (ko00601, P = 0.6600)</i></b> |                                                                                                                                         |                                                                                                                                                                                   |        |
| Cs6g08060                                                                                      | K01988 lactosylceramide 4-alpha-galactosyltransferase [EC:2.4.1.228]   (RefSeq) lactosylceramide 4-alpha-galactosyltransferase-like (A) | Uncharacterized protein At4g19900 (At5g01250)                                                                                                                                     | -1.262 |
| <b><i>Lipid catabolic process (GO:0016042, P = 0.0871)</i></b>                                 |                                                                                                                                         |                                                                                                                                                                                   |        |
| Cs3g21210                                                                                      | K09843 (+)-abscisic acid 8'-hydroxylase [EC:1.14.13.93]   (RefSeq) CYP707A2; abscisic acid 8'-hydroxylase 2-like (A)                    | Abscisic acid 8'-hydroxylase 3; ABA 8'-hydroxylase 3; EC=1.14.13.93; Cytochrome P450 707A3 (At5g45340)                                                                            | 8.454  |

|           |                                                                                                                                                                                                    |                                                                                                                                                                                                                                         |        |
|-----------|----------------------------------------------------------------------------------------------------------------------------------------------------------------------------------------------------|-----------------------------------------------------------------------------------------------------------------------------------------------------------------------------------------------------------------------------------------|--------|
| Cs8g01950 | --                                                                                                                                                                                                 | GDSL esterase/lipase At5g37690; EC=3.1.1.-; Extracellular lipase At5g37690; Flags: Precursor (At5g55050)                                                                                                                                | 9.603  |
| Cs4g19460 | K17913 carlactone synthase / all-trans-10'-apo-beta-carotenal 13,14-cleaving dioxygenase [EC:1.13.11.69 1.13.11.70]   (RefSeq) carotenoid cleavage dioxygenase 8 homolog B, chloroplastic-like (A) | Carotenoid cleavage dioxygenase 8 homolog B, chloroplastic; OsCCD8b; EC=1.13.11.69 {ECO:0000269 PubMed:22422982}; EC=1.13.11.70 {ECO:0000269 PubMed:18637791}; Protein DWARF-10; Protein MAX4 homolog; Flags: Precursor (At4g32810)     | 6.102  |
| Cs1g25090 | K17912 9-cis-beta-carotene 9',10'-cleaving dioxygenase [EC:1.13.11.68]   (RefSeq) carotenoid cleavage dioxygenase 7, chloroplastic (A)                                                             | Carotenoid cleavage dioxygenase 7, chloroplastic; AtCCD7; AtNCED7; Beta,beta-carotene 9',10'-oxygenase; EC=1.13.11.68; Protein MORE AXILLARY BRANCHING 3; Protein MORE AXILLARY GROWTH 3; Flags: Precursor (At2g44990)                  | 7.476  |
| Cs4g06810 | --                                                                                                                                                                                                 | GDSL esterase/lipase 5; EC=3.1.1.-; Extracellular lipase 5; Flags: Precursor (At1g53920)                                                                                                                                                | 9.775  |
| Cs1g24480 | K04123 ent-kaurenoic acid hydroxylase [EC:1.14.13.79]   (RefSeq) ent-kaurenoic acid oxidase 2-like (A)                                                                                             | Abscisic acid 8'-hydroxylase 3; ABA 8'-hydroxylase 3; EC=1.14.13.93; Cytochrome P450 707A7; OsABA8ox3 (At1g19630)                                                                                                                       | 4.003  |
| Cs2g20450 | K01052 lysosomal acid lipase/cholesteryl ester hydrolase [EC:3.1.1.13]   (RefSeq) triacylglycerol lipase 2-like (A)                                                                                | Triacylglycerol lipase 2; EC=3.1.1.3; Flags: Precursor (At5g14180)                                                                                                                                                                      | 7.755  |
| Cs1g22940 | --                                                                                                                                                                                                 | Patatin-like protein 1; EC=3.1.1.- (At4g37050)                                                                                                                                                                                          | 6.840  |
| Cs1g26240 | --                                                                                                                                                                                                 | GDSL esterase/lipase At4g16230; EC=3.1.1.-; Extracellular lipase At4g16230; Flags: Precursor (At3g04290)                                                                                                                                | 7.612  |
| Cs6g19840 | --                                                                                                                                                                                                 | GDSL esterase/lipase 7; EC=3.1.1.-; Extracellular lipase 7; Flags: Precursor (At5g15720)                                                                                                                                                | 10.401 |
| Cs2g20480 | K01052 lysosomal acid lipase/cholesteryl ester hydrolase [EC:3.1.1.13]   (RefSeq) triacylglycerol lipase 2-like (A)                                                                                | Triacylglycerol lipase 2; EC=3.1.1.3; Flags: Precursor (At5g14180)                                                                                                                                                                      | 11.666 |
| Cs3g14760 | K01115 phospholipase D1/2 [EC:3.1.4.4]   (RefSeq) phospholipase D zeta 1 (A)                                                                                                                       | Phospholipase D zeta 1 {ECO:0000303 PubMed:11891260}; PLDzeta1 {ECO:0000303 PubMed:11891260}; EC=3.1.4.4 {ECO:0000269 PubMed:11891260}; Phospholipase D p1; AtPLDp1; Phospholipase D1 PHOX and PX-containing domain protein (At3g05630) | 3.732  |
| Cs2g28140 | --                                                                                                                                                                                                 | GDSL esterase/lipase At3g27950; EC=3.1.1.-; Extracellular lipase At3g27950; Flags: Precursor (At3g27950)                                                                                                                                | -2.958 |
| Cs2g05250 | --                                                                                                                                                                                                 | GDSL esterase/lipase At5g45950; EC=3.1.1.-; Extracellular lipase At5g45950; Flags: Precursor (At5g45950)                                                                                                                                | -6.591 |
| Cs9g03990 | K00249 acyl-CoA dehydrogenase [EC:1.3.8.7]   (RefSeq) probable acyl-CoA dehydrogenase IBR3 (A)                                                                                                     | Probable acyl-CoA dehydrogenase IBR3 {ECO:0000305}; EC=1.3.99.- {ECO:0000305}; Protein INDOLE-3-BUTYRIC ACID RESPONSE 3 {ECO:0000303 PubMed:17277896} (At3g06810)                                                                       | 1.044  |
| Cs6g03540 | K22389 phospholipase A1 [EC:3.1.1.32]   (RefSeq) phospholipase A(1) LCAT3 (A)                                                                                                                      | Phospholipase A(1) LCAT3; EC=3.1.1.32; Lecithin-cholesterol acyltransferase-like 3 (At3g03310)                                                                                                                                          | -1.030 |

|                 |                                                                                                                                                                                                    |                                                                                                                                                                                                                                     |        |
|-----------------|----------------------------------------------------------------------------------------------------------------------------------------------------------------------------------------------------|-------------------------------------------------------------------------------------------------------------------------------------------------------------------------------------------------------------------------------------|--------|
| Cs4g19470       | K17913 carlactone synthase / all-trans-10'-apo-beta-carotenal 13,14-cleaving dioxygenase [EC:1.13.11.69 1.13.11.70]   (RefSeq) carotenoid cleavage dioxygenase 8 homolog B, chloroplastic-like (A) | Carotenoid cleavage dioxygenase 8 homolog B, chloroplastic; OsCCD8b; EC=1.13.11.69 {ECO:0000269 PubMed:22422982}; EC=1.13.11.70 {ECO:0000269 PubMed:18637791}; Protein DWARF-10; Protein MAX4 homolog; Flags: Precursor (At4g32810) | -1.097 |
| orange1.1t00452 | --                                                                                                                                                                                                 | GDSL esterase/lipase At4g01130; EC=3.1.1.-; Extracellular lipase At4g01130; Flags: Precursor (At4g01130)                                                                                                                            | -2.159 |
| Cs5g08030       | K16818 phospholipase A1 [EC:3.1.1.32]   (RefSeq) phospholipase A(1) DAD1, chloroplastic-like (A)                                                                                                   | Phospholipase A1-Ibeta2, chloroplastic; EC=3.1.1.-; Flags: Precursor (At4g16820)                                                                                                                                                    | -1.206 |
| Cs2g05010       | K16818 phospholipase A1 [EC:3.1.1.32]   (RefSeq) phospholipase A(1) DAD1, chloroplastic-like (A)                                                                                                   | Phospholipase A1-IIgamma; EC=3.1.1.-; DAD1-like seedling establishment-related lipase; AtDSEL; Phospholipase DSEL (At4g18550)                                                                                                       | -2.253 |
| Cs5g02100       | --                                                                                                                                                                                                 | GDSL esterase/lipase At5g08460; EC=3.1.1.-; Extracellular lipase At5g08460; Flags: Precursor (At4g10950_2)                                                                                                                          | 2.912  |
| Cs1g25830       | --                                                                                                                                                                                                 | GDSL esterase/lipase EXL3; EC=3.1.1.-; Family II extracellular lipase 3; Family II lipase EXL3; Flags: Precursor (At1g75900)                                                                                                        | -3.282 |
| Cs3g26720       | K01115 phospholipase D1/2 [EC:3.1.4.4]   (RefSeq) phospholipase D delta (A)                                                                                                                        | Phospholipase D delta {ECO:0000303 PubMed:11891260}; AtPLDdelta {ECO:0000303 PubMed:11891260}; PLD delta {ECO:0000303 PubMed:11891260}; EC=3.1.4.4 {ECO:0000269 PubMed:11706190, ECO:0000269 PubMed:12397060} (At4g35790)           | 1.179  |
| Cs5g06720       | --                                                                                                                                                                                                 | GDSL esterase/lipase At3g48460; EC=3.1.1.-; Extracellular lipase At3g48460; Flags: Precursor (At3g48460)                                                                                                                            | -3.176 |
| Cs7g15620       | K01114 phospholipase C [EC:3.1.4.3]   (RefSeq) non-specific phospholipase C4-like (A)                                                                                                              | Non-specific phospholipase C4; EC=3.1.4.3 (At3g03530)                                                                                                                                                                               | 1.735  |
| Cs4g10140       | --                                                                                                                                                                                                 | GDSL esterase/lipase At5g55050; EC=3.1.1.-; Extracellular lipase At5g55050; Flags: Precursor (At5g55050)                                                                                                                            | 1.873  |
| Cs7g02950       | K18696 glycerophosphodiester phosphodiesterase [EC:3.1.4.46]   (RefSeq) glycerophosphodiester phosphodiesterase GPD3-like (A)                                                                      | Glycerophosphodiester phosphodiesterase GPD3 {ECO:0000305}; EC=3.1.4.46 {ECO:0000250 UniProtKB:Q9SGA2}; Glycerophosphodiester phosphodiesterase 3 {ECO:0000303 PubMed:21323773}; ATGPD3 {ECO:0000303 PubMed:21323773} (At3g02040)   | -1.648 |
| Cs1g20840       | K13422 transcription factor MYC2   (RefSeq) transcription factor MYC2-like (A)                                                                                                                     | Transcription factor bHLH93; Basic helix-loop-helix protein 93; AtbHLH93; bHLH 93; Transcription factor EN 47; bHLH transcription factor bHLH093 (At5g65640)                                                                        | -1.361 |
| Cs8g20260       | K05857 phosphatidylinositol phospholipase C, delta [EC:3.1.4.11]   (RefSeq) phosphoinositide phospholipase C 2-like (A)                                                                            | Phosphoinositide phospholipase C 2; EC=3.1.4.11; Phosphoinositide phospholipase PLC2; AtPLC2; PI-PLC2 (At3g08510)                                                                                                                   | -2.099 |

|                                                     |                                                                                                                                                                       |                                                                                                                                                   |        |
|-----------------------------------------------------|-----------------------------------------------------------------------------------------------------------------------------------------------------------------------|---------------------------------------------------------------------------------------------------------------------------------------------------|--------|
| Cs3g26460                                           | --                                                                                                                                                                    | GDSL esterase/lipase EXL3; EC=3.1.1.-; Family II extracellular lipase 3; Family II lipase EXL3; Flags: Precursor (At1g75900)                      | -1.895 |
| Cs7g17450                                           | --                                                                                                                                                                    | GDSL esterase/lipase At4g10955; EC=3.1.1.- (At5g50890)                                                                                            | -1.023 |
| Cs6g08630                                           | K00232 acyl-CoA oxidase [EC:1.3.3.6]   (RefSeq) acyl-coenzyme A oxidase 4, peroxisomal-like (A)                                                                       | Acyl-coenzyme A oxidase 4, peroxisomal; AOX 4; EC=1.3.3.6; G6p; Short-chain acyl-CoA oxidase; AtCX4; AtG6; SAOX (At3g51840)                       | 1.544  |
| Cs5g31250                                           | --                                                                                                                                                                    | Probable inactive patatin-like protein 9; AtPLP9; Patatin-related phospholipase A IIIdelta; pPLAIIId; Phospholipase A IIIB; AtPLAIIIB (At3g63200) | -1.773 |
| Cs2g27100                                           | --                                                                                                                                                                    | GDSL esterase/lipase At5g14450; EC=3.1.1.-; Extracellular lipase At5g14450; Flags: Precursor (At5g14450)                                          | -1.380 |
| Cs7g05370                                           | K01115 phospholipase D1/2 [EC:3.1.4.4]   (RefSeq) phospholipase D alpha 1-like (A)                                                                                    | Phospholipase D alpha 1; PLD alpha 1; EC=3.1.4.4; Choline phosphatase 1; Phosphatidylcholine-hydrolyzing phospholipase D 1 (At1g52570)            | -1.690 |
| Cs5g34500                                           | --                                                                                                                                                                    | GDSL esterase/lipase At4g28780; EC=3.1.1.-; Extracellular lipase At4g28780; Flags: Precursor (At4g28780)                                          | 3.633  |
| Cs2g29630                                           | K01114 phospholipase C [EC:3.1.4.3]   (RefSeq) non-specific phospholipase C2 (A)                                                                                      | Non-specific phospholipase C2; EC=3.1.-.-; Flags: Precursor (At2g26870)                                                                           | 1.499  |
| orange1.1t00747                                     | K14674 TAG lipase / steryl ester hydrolase / phospholipase A2 / LPA acyltransferase [EC:3.1.1.3 3.1.1.13 3.1.1.4 2.3.1.51]   (RefSeq) triacylglycerol lipase SDP1 (A) | Triacylglycerol lipase SDP1; EC=3.1.1.3; Protein SUGAR-DEPENDENT 1 (At5g04040)                                                                    | -1.149 |
| Cs3g23530                                           | K09843 (+)-abscisic acid 8'-hydroxylase [EC:1.14.13.93]   (RefSeq) CYP707A4; abscisic acid 8'-hydroxylase 3-like (A)                                                  | Abscisic acid 8'-hydroxylase 3; ABA 8'-hydroxylase 3; EC=1.14.13.93; Cytochrome P450 707A7; OsABA8ox3 (At3g19270)                                 | -2.327 |
|                                                     |                                                                                                                                                                       |                                                                                                                                                   |        |
| <b>Fatty acid degradation (ko00071, P = 0.3202)</b> |                                                                                                                                                                       |                                                                                                                                                   |        |
| Cs3g17970                                           | K00121 S-(hydroxymethyl)glutathione dehydrogenase / alcohol dehydrogenase [EC:1.1.1.284 1.1.1.1]   (RefSeq) alcohol dehydrogenase-like 2 (A)                          | Alcohol dehydrogenase-like 2; EC=1.1.1.1 {ECO:0000250 UniProtKB:P06525} (At1g22440)                                                               | -1.741 |
| Cs7g14420                                           | K00121 S-(hydroxymethyl)glutathione dehydrogenase / alcohol dehydrogenase [EC:1.1.1.284 1.1.1.1]   (RefSeq) alcohol dehydrogenase-like 2 (A)                          | Alcohol dehydrogenase-like 2; EC=1.1.1.1 {ECO:0000250 UniProtKB:P06525} (At1g22440)                                                               | 1.064  |
| orange1.1t05469                                     | K00121 S-(hydroxymethyl)glutathione dehydrogenase / alcohol dehydrogenase [EC:1.1.1.284 1.1.1.1]   (RefSeq) alcohol dehydrogenase-like 2 (A)                          | Alcohol dehydrogenase-like 2; EC=1.1.1.1 {ECO:0000250 UniProtKB:P06525} (At1g22440)                                                               | -1.458 |
| novel.2520                                          | K00121 S-(hydroxymethyl)glutathione dehydrogenase / alcohol dehydrogenase [EC:1.1.1.284 1.1.1.1]   (RefSeq) alcohol dehydrogenase-like 2 (A)                          | (At5g16660)                                                                                                                                       | 1.174  |

|                                                              |                                                                                                                                                                       |                                                                                                                                                                   |                            |
|--------------------------------------------------------------|-----------------------------------------------------------------------------------------------------------------------------------------------------------------------|-------------------------------------------------------------------------------------------------------------------------------------------------------------------|----------------------------|
| Cs6g08630                                                    | K00232 acyl-CoA oxidase [EC:1.3.3.6]   (RefSeq) acyl-coenzyme A oxidase 4, peroxisomal-like (A)                                                                       | Acyl-coenzyme A oxidase 4, peroxisomal; AOX 4; EC=1.3.3.6; G6p; Short-chain acyl-CoA oxidase; AtCX4; AtG6; SAOX (At3g51840)                                       | 1.544                      |
| Cs9g03990                                                    | K00249 acyl-CoA dehydrogenase [EC:1.3.8.7]   (RefSeq) probable acyl-CoA dehydrogenase IBR3 (A)                                                                        | Probable acyl-CoA dehydrogenase IBR3 {ECO:0000305}; EC=1.3.99.- {ECO:0000305}; Protein INDOLE-3-BUTYRIC ACID RESPONSE 3 {ECO:0000303 PubMed:17277896} (At3g06810) | 1.044                      |
| Cs3g19600                                                    | K01897 long-chain acyl-CoA synthetase [EC:6.2.1.3]   (RefSeq) long chain acyl-CoA synthetase 9, chloroplastic (A)                                                     | Long chain acyl-CoA synthetase 9, chloroplastic; EC=6.2.1.3 (At1g77590)                                                                                           | 3.035                      |
| orange1.1t01720                                              | K01897 long-chain acyl-CoA synthetase [EC:6.2.1.3]   (RefSeq) long chain acyl-CoA synthetase 1 (A)                                                                    | Long chain acyl-CoA synthetase 1; EC=6.2.1.3; Protein ECERIFERUM 8 (At2g47240)                                                                                    | -3.137                     |
| orange1.1t01869                                              | K01897 long-chain acyl-CoA synthetase [EC:6.2.1.3]   (RefSeq) probable acyl-activating enzyme 16, chloroplastic (A)                                                   | Probable acyl-activating enzyme 16, chloroplastic; EC=6.2.1.-; Flags: Precursor (At4g14070)                                                                       | 1.284                      |
| orange1.1t00260                                              | K20495 long-chain fatty acid omega-monooxygenase [EC:1.14.13.205]   (RefSeq) cytochrome P450 704B1 (A)                                                                | Cytochrome P450 704C1; EC=1.14.-.-; Cytochrome P450 CYPD (At2g45510)                                                                                              | 3.304                      |
| orange1.1t00261                                              | K20495 long-chain fatty acid omega-monooxygenase [EC:1.14.13.205]   (RefSeq) cytochrome P450 704B1 (A)                                                                | Cytochrome P450 704C1; EC=1.14.-.-; Cytochrome P450 CYPD (At2g45510)                                                                                              | 2.097                      |
| <b>Linoleic acid metabolism (ko00591, P = 0.0548)</b>        |                                                                                                                                                                       |                                                                                                                                                                   |                            |
| orange1.1t03774                                              | K00454 lipoxygenase [EC:1.13.11.12]   (RefSeq) linoleate 13S-lipoxygenase 2-1, chloroplastic (A)                                                                      | Linoleate 13S-lipoxygenase 2-1, chloroplastic; EC=1.13.11.12; Lipoxygenase 2-1; Flags: Precursor (At3g45140)                                                      | -1.577                     |
| orange1.1t03775                                              | K00454 lipoxygenase [EC:1.13.11.12]   (RefSeq) linoleate 13S-lipoxygenase 2-1, chloroplastic (A)                                                                      | Linoleate 13S-lipoxygenase 2-1, chloroplastic; EC=1.13.11.12; Lipoxygenase 2-1; Flags: Precursor (At3g45140)                                                      | -6.142                     |
| orange1.1t04376                                              | K00454 lipoxygenase [EC:1.13.11.12]   (RefSeq) linoleate 13S-lipoxygenase 2-1, chloroplastic (A)                                                                      | Linoleate 13S-lipoxygenase 2-1, chloroplastic; EC=1.13.11.12; Lipoxygenase 2-1; Flags: Precursor (At3g45140)                                                      | -1.072                     |
| novel.2136                                                   | K00454 lipoxygenase [EC:1.13.11.12]   (RefSeq) linoleate 13S-lipoxygenase 2-1, chloroplastic (A)                                                                      | Lipoxygenase 2, chloroplastic; AtLOX2; EC=1.13.11.12; Flags: Precursor (At1g17420)                                                                                | -2.987                     |
| novel.2137                                                   | K00454 lipoxygenase [EC:1.13.11.12]   (RefSeq) linoleate 13S-lipoxygenase 2-1, chloroplastic (A)                                                                      | Linoleate 13S-lipoxygenase 2-1, chloroplastic; EC=1.13.11.12; Lipoxygenase 2-1; Flags: Precursor (At3g45140)                                                      | -3.653                     |
| orange1.1t00747                                              | K14674 TAG lipase / steryl ester hydrolase / phospholipase A2 / LPA acyltransferase [EC:3.1.1.3 3.1.1.13 3.1.1.4 2.3.1.51]   (RefSeq) triacylglycerol lipase SDP1 (A) | Triacylglycerol lipase SDP1; EC=3.1.1.3; Protein SUGAR-DEPENDENT 1 (At5g04040)                                                                                    | -1.149                     |
|                                                              |                                                                                                                                                                       |                                                                                                                                                                   |                            |
| <b>Index</b>                                                 | <b>Compounds</b>                                                                                                                                                      |                                                                                                                                                                   | <b>Log<sub>2</sub>(FC)</b> |
| <b>Fatty acid biosynthesis (ko00061, P = 0.9096)</b>         |                                                                                                                                                                       |                                                                                                                                                                   |                            |
| mws0361                                                      | Palmitoleic acid                                                                                                                                                      |                                                                                                                                                                   | 12.014                     |
| <b>alpha-Linolenic acid metabolism (ko00592, P = 0.6907)</b> |                                                                                                                                                                       |                                                                                                                                                                   |                            |

|                                                              |                                                              |  |        |
|--------------------------------------------------------------|--------------------------------------------------------------|--|--------|
| Zmpn003368                                                   | 13S-Hydroxy-9Z,11E,15Z-octadecatrienoic acid                 |  | -1.442 |
| Zmyn004548                                                   | 12-Oxo-phytodienoic acid                                     |  | -1.274 |
| pme0220                                                      | Methyl jasmonate                                             |  | 1.833  |
|                                                              |                                                              |  |        |
| <b><i>Linoleic acid metabolism (ko00591, P = 0.8432)</i></b> |                                                              |  |        |
| Lmbn005487                                                   | 12,13-DHOME; (9Z)-12,13-Dihydroxyoctadec-9-enoic acid        |  | -1.200 |
| mws0369                                                      | Arachidonic acid                                             |  | 4.717  |
| pmb2787                                                      | 9-Oxo-10E,12Z-octadecadienoic acid                           |  | -1.172 |
| Lmbn004240                                                   | 9,10-Dihydroxy-12,13-epoxyoctadecanoic acid                  |  | 1.986  |
| Lmbn006210                                                   | Dihomo-gamma-linolenic acid; (8Z,11Z,14Z)-Icosatrienoic acid |  | 10.458 |

**Table S14.** DEGs related to Pi homeostasis in RN0

| Accession No.                                                        | KEGG annotation                                                                                                                                                                       | Swissprot annotation (KOG annotation)                                                                                                                                                                                                                                                                                                                                                                                                             | Log <sub>2</sub> (FC) |
|----------------------------------------------------------------------|---------------------------------------------------------------------------------------------------------------------------------------------------------------------------------------|---------------------------------------------------------------------------------------------------------------------------------------------------------------------------------------------------------------------------------------------------------------------------------------------------------------------------------------------------------------------------------------------------------------------------------------------------|-----------------------|
| <b>Organophosphate biosynthetic process (GO:0090407, P = 0.2412)</b> |                                                                                                                                                                                       |                                                                                                                                                                                                                                                                                                                                                                                                                                                   |                       |
| Cs5g08370                                                            | K01535 H <sup>+</sup> -transporting ATPase [EC:3.6.3.6]   (RefSeq) ATPase 11, plasma membrane-type-like (A)                                                                           | ATPase 11, plasma membrane-type; EC=3.6.3.6; Proton pump 11 (At5g62670)                                                                                                                                                                                                                                                                                                                                                                           | 8.092                 |
| Cs6g19330                                                            | K13800 UMP-CMP kinase [EC:2.7.4.14]   (RefSeq) UMP-CMP kinase 3-like (A)                                                                                                              | UMP-CMP kinase 3 {ECO:0000255 HAMAP-Rule:MF_03172}; EC=2.7.4.14 {ECO:0000255 HAMAP-Rule:MF_03172}; Deoxycytidylate kinase {ECO:0000255 HAMAP-Rule:MF_03172}; CK {ECO:0000255 HAMAP-Rule:MF_03172}; dCMP kinase {ECO:0000255 HAMAP-Rule:MF_03172}; Uridine monophosphate/cytidine monophosphate kinase {ECO:0000255 HAMAP-Rule:MF_03172}; UMP/CMP kinase {ECO:0000255 HAMAP-Rule:MF_03172}; UMP/CMPK {ECO:0000255 HAMAP-Rule:MF_03172} (At3g60180) | 4.659                 |
| Cs6g20790                                                            | K09285 AP2-like factor, ANT lineage   (RefSeq) AP2-like ethylene-responsive transcription factor At1g16060 (A)                                                                        | Ethylene-responsive transcription factor WRI1; Protein ACTIVATOR OF SPORAMIN::LUC 1; Protein WRINKLED 1 (At1g16060)                                                                                                                                                                                                                                                                                                                               | 6.927                 |
| Cs7g04300                                                            | K09285 AP2-like factor, ANT lineage   (RefSeq) AP2-like ethylene-responsive transcription factor At1g16060 (A)                                                                        | Ethylene-responsive transcription factor WRI1; Protein ACTIVATOR OF SPORAMIN::LUC 1; Protein WRINKLED 1 (At5g17430)                                                                                                                                                                                                                                                                                                                               | 9.012                 |
| orange1.1t01398                                                      | K00864 glycerol kinase [EC:2.7.1.30]   (RefSeq) glycerol kinase (A)                                                                                                                   | Glycerol kinase; Glycerokinase; EC=2.7.1.30; ATP:glycerol 3-phosphotransferase; Protein GLYCEROL INSENSITIVE 1; Protein NONHOST RESISTANCE TO P. S. PHASEOLICOLA 1 (At1g80460)                                                                                                                                                                                                                                                                    | 2.927                 |
| Cs6g20410                                                            | K13508 glycerol-3-phosphate acyltransferase [EC:2.3.1.15 2.3.1.198]   (RefSeq) glycerol-3-phosphate 2-O-acyltransferase 6 (A)                                                         | Glycerol-3-phosphate 2-O-acyltransferase 6; AtGPAT6; EC=2.3.1.198; Glycerol-3-phosphate acyltransferase 6 (At2g38110)                                                                                                                                                                                                                                                                                                                             | 12.480                |
| Cs6g03440                                                            | K01535 H <sup>+</sup> -transporting ATPase [EC:3.6.3.6]   (RefSeq) plasma membrane ATPase 1-like (A)                                                                                  | Plasma membrane ATPase 1; EC=3.6.3.6; Proton pump 1 (At5g62670)                                                                                                                                                                                                                                                                                                                                                                                   | 3.613                 |
| Cs6g07610                                                            | K01962 acetyl-CoA carboxylase carboxyl transferase subunit alpha [EC:6.4.1.2 2.1.3.15]   (RefSeq) acetyl-coenzyme A carboxylase carboxyl transferase subunit alpha, chloroplastic (A) | Acetyl-coenzyme A carboxylase carboxyl transferase subunit alpha, chloroplastic; ACCase subunit alpha; Acetyl-CoA carboxylase carboxyltransferase subunit alpha; EC=6.4.1.2; Flags: Precursor (At2g38040)                                                                                                                                                                                                                                         | 2.188                 |
| Cs7g04640                                                            | K13508 glycerol-3-phosphate acyltransferase [EC:2.3.1.15 2.3.1.198]   (RefSeq) glycerol-3-phosphate 2-O-acyltransferase 6 (A)                                                         | Glycerol-3-phosphate 2-O-acyltransferase 6; AtGPAT6; EC=2.3.1.198; Glycerol-3-phosphate acyltransferase 6 (At2g38110)                                                                                                                                                                                                                                                                                                                             | 11.836                |
| Cs6g17490                                                            | K13789 geranylgeranyl diphosphate synthase, type II [EC:2.5.1.1 2.5.1.10 2.5.1.29]   (RefSeq) geranylgeranyl pyrophosphate synthase 7, chloroplastic-like (A)                         | Heterodimeric geranylgeranyl pyrophosphate synthase large subunit 1, chloroplastic; GGPP synthase 1; GGPS1; EC=2.5.1.-; (2E,6E)-farnesyl diphosphate synthase 1; Dimethylallyltranstransferase 1; EC=2.5.1.1; Farnesyl diphosphate synthase 1; Farnesyltranstransferase 1; EC=2.5.1.29; Geranyltranstransferase 1; EC=2.5.1.10; Flags: Precursor (At4g36810)                                                                                      | 3.885                 |
| Cs6g03445                                                            | K01535 H <sup>+</sup> -transporting ATPase [EC:3.6.3.6]   (RefSeq) ATPase 11, plasma membrane-type (A)                                                                                | ATPase 4, plasma membrane-type; EC=3.6.3.6; Proton pump 4 (At1g80660)                                                                                                                                                                                                                                                                                                                                                                             | 3.771                 |

|                 |                                                                                                                                                                                                              |                                                                                                                                                                                                                                                                                                                                                                                                                                                                                  |       |
|-----------------|--------------------------------------------------------------------------------------------------------------------------------------------------------------------------------------------------------------|----------------------------------------------------------------------------------------------------------------------------------------------------------------------------------------------------------------------------------------------------------------------------------------------------------------------------------------------------------------------------------------------------------------------------------------------------------------------------------|-------|
| Cs4g04540       | K01961 acetyl-CoA carboxylase, biotin carboxylase subunit [EC:6.4.1.2 6.3.4.14]   (RefSeq) biotin carboxylase 2, chloroplastic (A)                                                                           | Biotin carboxylase 2, chloroplastic; EC=6.3.4.14; Acetyl-CoA carboxylase subunit A 2; ACC; EC=6.4.1.2; Flags: Precursor (At5g35360)                                                                                                                                                                                                                                                                                                                                              | 2.293 |
| orange1.1t05835 | K00161 pyruvate dehydrogenase E1 component alpha subunit [EC:1.2.4.1]   (RefSeq) pyruvate dehydrogenase E1 component subunit alpha-3, chloroplastic (A)                                                      | Pyruvate dehydrogenase E1 component subunit alpha-3, chloroplastic; EC=1.2.4.1; Flags: Precursor (At1g01090)                                                                                                                                                                                                                                                                                                                                                                     | 2.430 |
| Cs6g03430       | K01535 H <sup>+</sup> -transporting ATPase [EC:3.6.3.6]   (RefSeq) plasma membrane ATPase 1-like (A)                                                                                                         | ATPase 7, plasma membrane-type; EC=3.6.3.6; Proton pump 7 (At3g60330)                                                                                                                                                                                                                                                                                                                                                                                                            | 4.784 |
| Cs3g22480       | K00627 pyruvate dehydrogenase E2 component (dihydrolipoamide acetyltransferase) [EC:2.3.1.12]   (RefSeq) dihydrolipoamide acetyltransferase component 5 of pyruvate dehydrogenase complex, chloroplastic (A) | Dihydrolipoamide acetyltransferase component 5 of pyruvate dehydrogenase complex, chloroplastic; EC=2.3.1.12; Dihydrolipoamide S-acetyltransferase component 5 of pyruvate dehydrogenase complex; Protein EMBRYO DEFECTIVE 3003; Pyruvate dehydrogenase complex component E2 5; PDC-E2 5; PDCE2 5; Flags: Precursor (At1g34430)                                                                                                                                                  | 2.150 |
| Cs5g27560       | K09517 DnaJ homolog subfamily B member 11   (RefSeq) dnaJ protein ERDJ3B (A)                                                                                                                                 | Chaperone protein dnaJ 20, chloroplastic; AtDjC20; AtJ20; Flags: Precursor (At4g13830)                                                                                                                                                                                                                                                                                                                                                                                           | 1.144 |
| Cs9g02470       | K00382 dihydrolipoamide dehydrogenase [EC:1.8.1.4]   (RefSeq) dihydrolipoamide dehydrogenase 2, chloroplastic-like (A)                                                                                       | Dihydrolipoamide dehydrogenase 1, chloroplastic; ptLPD1; EC=1.8.1.4; Dihydrolipoamide dehydrogenase 1; Protein LIPOAMIDE DEHYDROGENASE 1; Pyruvate dehydrogenase complex E3 subunit 1; E3-1; PDC-E3 1; Flags: Precursor (At3g16950)                                                                                                                                                                                                                                              | 2.130 |
| Cs3g14760       | K01115 phospholipase D1/2 [EC:3.1.4.4]   (RefSeq) phospholipase D zeta 1 (A)                                                                                                                                 | Phospholipase D zeta 1 {ECO:0000303 PubMed:11891260}; PLDzeta1 {ECO:0000303 PubMed:11891260}; EC=3.1.4.4 {ECO:0000269 PubMed:11891260}; Phospholipase D p1; AtPLDp1; Phospholipase D1 PHOX and PX-containing domain protein (At3g05630)                                                                                                                                                                                                                                          | 3.732 |
| Cs4g12520       | K15631 molybdenum cofactor sulfurtransferase [EC:2.8.1.9]   (RefSeq) ABA3; molybdenum cofactor sulfurase (A)                                                                                                 | Molybdenum cofactor sulfurase {ECO:0000255 HAMAP-Rule:MF_03050}; MCS {ECO:0000255 HAMAP-Rule:MF_03050}; MOS {ECO:0000255 HAMAP-Rule:MF_03050}; MoCo sulfurase {ECO:0000255 HAMAP-Rule:MF_03050}; EC=2.8.1.9 {ECO:0000255 HAMAP-Rule:MF_03050, ECO:0000269 PubMed:11553608, ECO:0000269 PubMed:15561708}; Absciscic acid protein 3; Low expression of osmotically expressive genes protein 5; Molybdenum cofactor sulfurtransferase {ECO:0000255 HAMAP-Rule:MF_03050} (At1g16540) | 1.756 |
| Cs1g20200       | K00850 6-phosphofructokinase 1 [EC:2.7.1.11]   (RefSeq) ATP-dependent 6-phosphofructokinase 5, chloroplastic (A)                                                                                             | ATP-dependent 6-phosphofructokinase 5, chloroplastic {ECO:0000255 HAMAP-Rule:MF_03186}; ATP-PFK 5 {ECO:0000255 HAMAP-Rule:MF_03186}; Phosphofructokinase 5 {ECO:0000255 HAMAP-Rule:MF_03186}; EC=2.7.1.11 {ECO:0000255 HAMAP-Rule:MF_03186}; Phosphohexokinase 5 {ECO:0000255 HAMAP-Rule:MF_03186}; Flags: Precursor (At2g22480)                                                                                                                                                 | 1.593 |

|                 |                                                                                                                                                                                                              |                                                                                                                                                                                                                                                                                                                                    |        |
|-----------------|--------------------------------------------------------------------------------------------------------------------------------------------------------------------------------------------------------------|------------------------------------------------------------------------------------------------------------------------------------------------------------------------------------------------------------------------------------------------------------------------------------------------------------------------------------|--------|
| orange1.1t00081 | K05929 phosphoethanolamine N-methyltransferase [EC:2.1.1.103]   (RefSeq) phosphoethanolamine N-methyltransferase 1-like (A)                                                                                  | Phosphoethanolamine N-methyltransferase 1; AtNMT1; PEAMT 1; EC=2.1.1.103; Protein XIPOTL 1 (At1g48600)                                                                                                                                                                                                                             | -3.710 |
| Cs4g08160       | K00876 uridine kinase [EC:2.7.1.48]   (RefSeq) uridine kinase-like protein 3 (A)                                                                                                                             | Uridine kinase-like protein 3; Includes: Uridine kinase; UK; EC=2.7.1.48; Putative uracil phosphoribosyltransferase; UPRase; EC=2.4.2.9; AltName: UMP pyrophosphorylase (At1g55810)                                                                                                                                                | -1.131 |
| Cs1g16750       | K21797 phosphatidylinositol 4-phosphatase [EC:3.1.3.-]   (RefSeq) phosphoinositide phosphatase SAC6 (A)                                                                                                      | Phosphoinositide phosphatase SAC2; AtSAC2; EC=3.1.3.-; Phosphatidylinositol 3,5-bisphosphate 5-phosphatase SAC2; Protein SUPPRESSOR OF ACTIN 2; SAC domain protein 2 (At3g43220)                                                                                                                                                   | 1.234  |
| Cs7g13170       | K00627 pyruvate dehydrogenase E2 component (dihydrolipoamide acetyltransferase) [EC:2.3.1.12]   (RefSeq) dihydrolipoamide acetyltransferase component 4 of pyruvate dehydrogenase complex, chloroplastic (A) | Dihydrolipoamide acetyltransferase component 4 of pyruvate dehydrogenase complex, chloroplastic; EC=2.3.1.12; Dihydrolipoamide S-acetyltransferase component 4 of pyruvate dehydrogenase complex; Pyruvate dehydrogenase complex component E2 4; PDC-E2 4; PDCE2 4; pE2; Flags: Precursor (At3g25860)                              | 1.902  |
| Cs2g03260       | K00162 pyruvate dehydrogenase E1 component beta subunit [EC:1.2.4.1]   (RefSeq) pyruvate dehydrogenase E1 component subunit beta-3, chloroplastic-like (A)                                                   | Pyruvate dehydrogenase E1 component subunit beta-3, chloroplastic; EC=1.2.4.1; Flags: Precursor (At2g34590)                                                                                                                                                                                                                        | 2.142  |
| Cs6g03420       | K01535 H <sup>+</sup> -transporting ATPase [EC:3.6.3.6]   (RefSeq) plasma membrane ATPase 1-like (A)                                                                                                         | Plasma membrane ATPase 1; EC=3.6.3.6; Proton pump 1 (At5g62670)                                                                                                                                                                                                                                                                    | 1.431  |
| Cs5g29670       | K06041 arabinose-5-phosphate isomerase [EC:5.3.1.13]   (RefSeq) probable arabinose 5-phosphate isomerase (A)                                                                                                 | Probable arabinose 5-phosphate isomerase; API; EC=5.3.1.13; CBS domain-containing protein CBSSIS1 (At3g54690)                                                                                                                                                                                                                      | -1.810 |
| Cs1g15840       | K00844 hexokinase [EC:2.7.1.1]   (RefSeq) hexokinase-1-like (A)                                                                                                                                              | Hexokinase-1; EC=2.7.1.1; NtHxK1 (At4g29130)                                                                                                                                                                                                                                                                                       | -2.510 |
| Cs8g06970       | K13513 lysocardiolipin and lysophospholipid acyltransferase [EC:2.3.1.-2.3.1.51]   (RefSeq) probable 1-acyl-sn-glycerol-3-phosphate acyltransferase 5 (A)                                                    | Probable 1-acyl-sn-glycerol-3-phosphate acyltransferase 5; EC=2.3.1.51; Lysophosphatidyl acyltransferase 5 (At3g18850)                                                                                                                                                                                                             | -3.028 |
| Cs5g10150       | --                                                                                                                                                                                                           | Molybdenum cofactor sulfurase {ECO:0000255 HAMAP-Rule:MF_03050}; MCS {ECO:0000255 HAMAP-Rule:MF_03050}; MOS {ECO:0000255 HAMAP-Rule:MF_03050}; MoCo sulfurase {ECO:0000255 HAMAP-Rule:MF_03050}; EC=2.8.1.9 {ECO:0000255 HAMAP-Rule:MF_03050}; Molybdenum cofactor sulfurtransferase {ECO:0000255 HAMAP-Rule:MF_03050} (At5g51920) | 1.776  |
| orange1.1t03552 | K01613 phosphatidylserine decarboxylase [EC:4.1.1.65]   (RefSeq) phosphatidylserine decarboxylase proenzyme 2-like (A)                                                                                       | Phosphatidylserine decarboxylase proenzyme 2; EC=4.1.1.65 {ECO:0000255 HAMAP-Rule:MF_03209}; Contains: Phosphatidylserine decarboxylase 2 beta chain; Contains: Phosphatidylserine decarboxylase 2 alpha chain (At5g57190)                                                                                                         | 1.078  |
| Cs7g24930       | K00856 adenosine kinase [EC:2.7.1.20]   (RefSeq) adenosine kinase 2 (A)                                                                                                                                      | Adenosine kinase 2; AK 2; EC=2.7.1.20; Adenosine 5'-phosphotransferase 2 (At5g03300)                                                                                                                                                                                                                                               | -1.198 |

|           |                                                                                                                                                                         |                                                                                                                                                                                                                                                                                                        |        |
|-----------|-------------------------------------------------------------------------------------------------------------------------------------------------------------------------|--------------------------------------------------------------------------------------------------------------------------------------------------------------------------------------------------------------------------------------------------------------------------------------------------------|--------|
| Cs7g26180 | K01689 enolase [EC:4.2.1.11]   (RefSeq) enolase 1, chloroplastic (A)                                                                                                    | Enolase 1, chloroplastic; EC=4.2.1.11; 2-phospho-D-glycerate hydro-lyase 1; 2-phosphoglycerate dehydratase 1; Flags: Precursor (At1g74030)                                                                                                                                                             | 1.238  |
| Cs2g28120 | K00278 L-aspartate oxidase [EC:1.4.3.16]   (RefSeq) L-aspartate oxidase, chloroplastic (A)                                                                              | L-aspartate oxidase, chloroplastic; EC=1.4.3.16; Protein FLAGELLIN-INSENSITIVE 4; Flags: Precursor (At5g14760)                                                                                                                                                                                         | -1.382 |
| Cs1g15970 | K00850 6-phosphofructokinase 1 [EC:2.7.1.11]   (RefSeq) ATP-dependent 6-phosphofructokinase 3-like (A)                                                                  | ATP-dependent 6-phosphofructokinase 3 {ECO:0000255 HAMAP-Rule:MF_03186}; ATP-PFK 3 {ECO:0000255 HAMAP-Rule:MF_03186}; Phosphofructokinase 3 {ECO:0000255 HAMAP-Rule:MF_03186}; EC=2.7.1.11 {ECO:0000255 HAMAP-Rule:MF_03186}; Phosphohexokinase 3 {ECO:0000255 HAMAP-Rule:MF_03186} (At4g29220)        | 1.165  |
| Cs3g25560 | K02154 V-type H <sup>+</sup> -transporting ATPase subunit a   (RefSeq) V-type proton ATPase subunit a3 (A)                                                              | V-type proton ATPase subunit a3; V-ATPase subunit a3; V-type proton ATPase 95 kDa subunit a isoform 3; V-ATPase 95 kDa isoform a3; Vacuolar H <sup>(+)</sup> -ATPase subunit a isoform 3; Vacuolar proton pump subunit a3; Vacuolar proton translocating ATPase 95 kDa subunit a isoform 3 (At4g39080) | 1.143  |
| Cs8g20230 | K06215 pyridoxal 5'-phosphate synthase pdxS subunit [EC:4.3.3.6]   (RefSeq) probable pyridoxal 5'-phosphate synthase subunit PDX1 (A)                                   | Probable pyridoxal 5'-phosphate synthase subunit PDX1; PLP synthase subunit PDX1; EC=4.3.3.6; Ethylene-inducible protein HEVER (At5g01410)                                                                                                                                                             | -1.767 |
| Cs7g32500 | K01803 triosephosphate isomerase (TIM) [EC:5.3.1.1]   (RefSeq) triosephosphate isomerase, cytosolic (A)                                                                 | Triosephosphate isomerase, cytosolic; TIM; Triose-phosphate isomerase; EC=5.3.1.1 (At3g55440)                                                                                                                                                                                                          | -1.019 |
| Cs1g03320 | K01535 H <sup>+</sup> -transporting ATPase [EC:3.6.3.6]   (RefSeq) ATPase 11, plasma membrane-type (A)                                                                  | Plasma membrane ATPase 1; EC=3.6.3.6; Proton pump 1 (At2g44850_2)                                                                                                                                                                                                                                      | 1.049  |
| novel.818 | K00134 glyceraldehyde 3-phosphate dehydrogenase [EC:1.2.1.12]   (RefSeq) glyceraldehyde-3-phosphate dehydrogenase GAPC1, cytosolic (A)                                  | Glyceraldehyde-3-phosphate dehydrogenase, cytosolic; EC=1.2.1.12; Flags: Fragment (At1g13440)                                                                                                                                                                                                          | -1.068 |
| Cs7g30910 | K10808 ribonucleoside-diphosphate reductase subunit M2 [EC:1.17.4.1]   (RefSeq) ribonucleoside-diphosphate reductase small chain (A)                                    | Ribonucleoside-diphosphate reductase small chain; EC=1.17.4.1; Ribonucleoside-diphosphate reductase R2 subunit; Ribonucleotide reductase small subunit (At3g27060)                                                                                                                                     | -1.313 |
| Cs8g06950 | K00162 pyruvate dehydrogenase E1 component beta subunit [EC:1.2.4.1]   (RefSeq) pyruvate dehydrogenase E1 component subunit beta-3, chloroplastic (A)                   | Pyruvate dehydrogenase E1 component subunit beta-3, chloroplastic; EC=1.2.4.1; Flags: Precursor (At2g34590)                                                                                                                                                                                            | 1.832  |
| Cs5g01270 | K00161 pyruvate dehydrogenase E1 component alpha subunit [EC:1.2.4.1]   (RefSeq) pyruvate dehydrogenase E1 component subunit alpha-3, chloroplastic (A)                 | Pyruvate dehydrogenase E1 component subunit alpha-3, chloroplastic; EC=1.2.4.1; Flags: Precursor (At1g01090)                                                                                                                                                                                           | 1.356  |
| Cs9g13270 | K00999 CDP-diacylglycerol--inositol 3-phosphatidyltransferase [EC:2.7.8.11]   (RefSeq) CDP-diacylglycerol--inositol 3-phosphatidyltransferase 1-like (A)                | CDP-diacylglycerol--inositol 3-phosphatidyltransferase 1; EC=2.7.8.11; Phosphatidylinositol synthase 1; AtPIS1; PI synthase 1; PtdIns synthase 1 (At1g68000)                                                                                                                                           | 1.627  |
| Cs5g25570 | K00913 inositol-1,3,4-trisphosphate 5/6-kinase / inositol-tetrakisphosphate 1-kinase [EC:2.7.1.159 2.7.1.134]   (RefSeq) inositol-tetrakisphosphate 1-kinase 1-like (A) | Inositol-tetrakisphosphate 1-kinase 1; EC=2.7.1.134 {ECO:0000305}; Inositol 1,3,4-trisphosphate 5/6-kinase 1; AtItpk-1; Inositol-triphosphate 5/6-kinase 1; Ins(1,3,4)P(3) 5/6-kinase 1; EC=2.7.1.159 {ECO:0000269 PubMed:9126335} (At5g16760)                                                         | -2.079 |

|                 |                                                                                                                                                           |                                                                                                                                                                                                                                                                                                                                                                                                                    |        |
|-----------------|-----------------------------------------------------------------------------------------------------------------------------------------------------------|--------------------------------------------------------------------------------------------------------------------------------------------------------------------------------------------------------------------------------------------------------------------------------------------------------------------------------------------------------------------------------------------------------------------|--------|
| Cs7g12380       | K00876 uridine kinase [EC:2.7.1.48]   (RefSeq) uridine-cytidine kinase C (A)                                                                              | Uridine kinase-like protein 1, chloroplastic; Uridine kinase; UK; EC=2.7.1.48; Putative uracil phosphoribosyltransferase; UPRTase; EC=2.4.2.9; UMP pyrophosphorylase; Flags: Precursor (At1g26190)                                                                                                                                                                                                                 | -1.459 |
| Cs4g18980       | K00850 6-phosphofructokinase 1 [EC:2.7.1.11]   (RefSeq) ATP-dependent 6-phosphofructokinase 6 (A)                                                         | ATP-dependent 6-phosphofructokinase 3 {ECO:0000255 HAMAP-Rule:MF_03186}; ATP-PFK 3 {ECO:0000255 HAMAP-Rule:MF_03186}; Phosphofructokinase 3 {ECO:0000255 HAMAP-Rule:MF_03186}; EC=2.7.1.11 {ECO:0000255 HAMAP-Rule:MF_03186}; Phosphohexokinase 3 {ECO:0000255 HAMAP-Rule:MF_03186} (At4g32840)                                                                                                                    | -2.038 |
| Cs5g19180       | K03860 phosphatidylinositol glycan, class Q   (RefSeq) phosphatidylinositol N-acetylglucosaminyltransferase subunit GPII-like (A)                         | (At3g57170)                                                                                                                                                                                                                                                                                                                                                                                                        | 1.663  |
| Cs1g01700       | K01858 myo-inositol-1-phosphate synthase [EC:5.5.1.4]   (RefSeq) inositol-3-phosphate synthase (A)                                                        | Inositol-3-phosphate synthase; MIP synthase; EC=5.5.1.4; Myo-inositol 1-phosphate synthase; IPS; MI-1-P synthase (At2g22240)                                                                                                                                                                                                                                                                                       | -1.646 |
| Cs3g26050       | K00844 hexokinase [EC:2.7.1.1]   (RefSeq) hexokinase-2, chloroplastic (A)                                                                                 | Hexokinase-2, chloroplastic; EC=2.7.1.1; NtHxK2; Flags: Precursor (At1g47840)                                                                                                                                                                                                                                                                                                                                      | 1.128  |
| Cs9g05930       | K10808 ribonucleoside-diphosphate reductase subunit M2 [EC:1.17.4.1]   (RefSeq) ribonucleoside-diphosphate reductase small chain A (A)                    | Ribonucleoside-diphosphate reductase small chain A; EC=1.17.4.1; Ribonucleoside-diphosphate reductase R2A subunit; AtRNR2; Protein R2at; Ribonucleotide reductase small subunit A (At3g23580)                                                                                                                                                                                                                      | 1.069  |
| Cs2g12080       | K01937 CTP synthase [EC:6.3.4.2]   (RefSeq) CTP synthase (A)                                                                                              | (At1g30820)                                                                                                                                                                                                                                                                                                                                                                                                        | -1.009 |
| Cs1g20530       | K01662 1-deoxy-D-xylulose-5-phosphate synthase [EC:2.2.1.7]   (RefSeq) probable 1-deoxy-D-xylulose-5-phosphate synthase 2, chloroplastic (A)              | Probable 1-deoxy-D-xylulose-5-phosphate synthase 2, chloroplastic; 1-deoxyxylulose-5-phosphate synthase; DXP synthase; DXPS; EC=2.2.1.7; Flags: Precursor (At4g15560)                                                                                                                                                                                                                                              | -1.131 |
| Cs3g24680       | K01520 dUTP pyrophosphatase [EC:3.6.1.23]   (RefSeq) deoxyuridine 5'-triphosphate nucleotidohydrolase (A)                                                 | Deoxyuridine 5'-triphosphate nucleotidohydrolase; dUTPase; EC=3.6.1.23; dUTP pyrophosphatase; dUTP-pyrophosphatase-like 1; AtDUT1 (At3g46940)                                                                                                                                                                                                                                                                      | -1.325 |
| orange1.1t03222 | K01937 CTP synthase [EC:6.3.4.2]   (RefSeq) CTP synthase (A)                                                                                              | (At3g12670)                                                                                                                                                                                                                                                                                                                                                                                                        | -1.162 |
| Cs2g11790       | K15631 molybdenum cofactor sulfurtransferase [EC:2.8.1.9]   (RefSeq) ABA3; molybdenum cofactor sulfurase (A)                                              | Molybdenum cofactor sulfurase {ECO:0000255 HAMAP-Rule:MF_03050}; MCS {ECO:0000255 HAMAP-Rule:MF_03050}; MOS {ECO:0000255 HAMAP-Rule:MF_03050}; MoCo sulfurase {ECO:0000255 HAMAP-Rule:MF_03050}; EC=2.8.1.9 {ECO:0000255 HAMAP-Rule:MF_03050}; Molybdenum cofactor sulfurase-like protein 3 {ECO:0000255 HAMAP-Rule:MF_03050}; Molybdenum cofactor sulfurtransferase {ECO:0000255 HAMAP-Rule:MF_03050} (At1g30910) | -1.046 |
| Cs8g07410       | K13998 dihydrofolate reductase / thymidylate synthase [EC:1.5.1.3 2.1.1.45]   (RefSeq) bifunctional dihydrofolate reductase-thymidylate synthase-like (A) | Bifunctional dihydrofolate reductase-thymidylate synthase; DHFR-TS; Dihydrofolate reductase; EC=1.5.1.3; Thymidylate synthase; EC=2.1.1.45 (At4g34570_2)                                                                                                                                                                                                                                                           | -1.139 |

|                                                                   |                                                                                                                                                                                                                        |                                                                                                                                                                                                                                                                                                                                           |        |
|-------------------------------------------------------------------|------------------------------------------------------------------------------------------------------------------------------------------------------------------------------------------------------------------------|-------------------------------------------------------------------------------------------------------------------------------------------------------------------------------------------------------------------------------------------------------------------------------------------------------------------------------------------|--------|
| Cs2g27070                                                         | K00876 uridine kinase [EC:2.7.1.48]   (RefSeq) uridine kinase-like protein 5 (A)                                                                                                                                       | Uridine kinase-like protein 5; Probable uridine kinase; Short=UK; EC=2.7.1.48; Probable uracil phosphoribosyltransferase; UPRTase; EC=2.4.2.9; UMP pyrophosphorylase (At3g27440)                                                                                                                                                          | 1.403  |
| orange1.1t02315                                                   | K01937 CTP synthase [EC:6.3.4.2]   (RefSeq) CTP synthase-like (A)                                                                                                                                                      | (At3g12670)                                                                                                                                                                                                                                                                                                                               | -2.022 |
| Cs3g03640                                                         | K13789 geranylgeranyl diphosphate synthase, type II [EC:2.5.1.1 2.5.1.10 2.5.1.29]   (RefSeq) geranylgeranyl pyrophosphate synthase, chloroplastic-like (A)                                                            | Geranylgeranyl pyrophosphate synthase, chloroplastic; GGPP synthase; GGPS; EC=2.5.1.-; (2E,6E)-farnesyl diphosphate synthase; Dimethylallyltranstransferase; EC=2.5.1.1; Farnesyl diphosphate synthase; Farnesyltranstransferase; EC=2.5.1.29; Geranyltranstransferase; EC=2.5.1.10; Flags: Precursor (At4g36810)                         | -1.828 |
| orange1.1t02546                                                   | K05275 pyridoxine 4-dehydrogenase [EC:1.1.1.65]   (RefSeq) pyridoxal reductase, chloroplastic (A)                                                                                                                      | Pyridoxal reductase, chloroplastic; EC=1.1.1.65; Flags: Precursor (At5g53580)                                                                                                                                                                                                                                                             | 1.387  |
| <b>Organophosphate catabolic process (GO:0046434, P = 0.0003)</b> |                                                                                                                                                                                                                        |                                                                                                                                                                                                                                                                                                                                           |        |
| Cs6g20790                                                         | K09285 AP2-like factor, ANT lineage   (RefSeq) AP2-like ethylene-responsive transcription factor At1g16060 (A)                                                                                                         | Ethylene-responsive transcription factor WRI1; Protein ACTIVATOR OF SPORAMIN::LUC 1; Protein WRINKLED 1 (At1g16060)                                                                                                                                                                                                                       | 6.927  |
| Cs7g04300                                                         | K09285 AP2-like factor, ANT lineage   (RefSeq) AP2-like ethylene-responsive transcription factor At1g16060 (A)                                                                                                         | Ethylene-responsive transcription factor WRI1; Protein ACTIVATOR OF SPORAMIN::LUC 1; Protein WRINKLED 1 (At5g17430)                                                                                                                                                                                                                       | 9.012  |
| Cs2g26840                                                         | K00006 glycerol-3-phosphate dehydrogenase (NAD+) [EC:1.1.1.8]   (RefSeq) glycerol-3-phosphate dehydrogenase [NAD(+)] (A)                                                                                               | Glycerol-3-phosphate dehydrogenase [NAD(+)]; EC=1.1.1.8 (At5g40610)                                                                                                                                                                                                                                                                       | 4.138  |
| orange1.1t05835                                                   | K00161 pyruvate dehydrogenase E1 component alpha subunit [EC:1.2.4.1]   (RefSeq) pyruvate dehydrogenase E1 component subunit alpha-3, chloroplastic (A)                                                                | Pyruvate dehydrogenase E1 component subunit alpha-3, chloroplastic; EC=1.2.4.1; Flags: Precursor (At1g01090)                                                                                                                                                                                                                              | 2.430  |
| Cs3g22480                                                         | K00627 pyruvate dehydrogenase E2 component (dihydrolipoamide acetyltransferase) [EC:2.3.1.12]   (RefSeq) dihydrolipoalysine-residue acetyltransferase component 5 of pyruvate dehydrogenase complex, chloroplastic (A) | Dihydrolipoalysine-residue acetyltransferase component 5 of pyruvate dehydrogenase complex, chloroplastic; EC=2.3.1.12; Dihydrolipoamide S-acetyltransferase component 5 of pyruvate dehydrogenase complex; Protein EMBRYO DEFECTIVE 3003; Pyruvate dehydrogenase complex component E2 5; PDC-E2 5; PDCE2 5; Flags: Precursor (At1g34430) | 2.150  |
| orange1.1t02914                                                   | K00006 glycerol-3-phosphate dehydrogenase (NAD+) [EC:1.1.1.8]   (RefSeq) glycerol-3-phosphate dehydrogenase [NAD(+)] GPDHC1, cytosolic (A)                                                                             | Probable glycerol-3-phosphate dehydrogenase [NAD(+)] 1, cytosolic; EC=1.1.1.8 (At2g41540)                                                                                                                                                                                                                                                 | 3.566  |
| Cs1g20200                                                         | K00850 6-phosphofructokinase 1 [EC:2.7.1.11]   (RefSeq) ATP-dependent 6-phosphofructokinase 5, chloroplastic (A)                                                                                                       | ATP-dependent 6-phosphofructokinase 5, chloroplastic {ECO:0000255 HAMAP-Rule:MF_03186}; ATP-PFK 5 {ECO:0000255 HAMAP-Rule:MF_03186}; Phosphofructokinase 5 {ECO:0000255 HAMAP-Rule:MF_03186}; EC=2.7.1.11 {ECO:0000255 HAMAP-Rule:MF_03186}; Phosphohexokinase 5 {ECO:0000255 HAMAP-Rule:MF_03186}; Flags: Precursor (At2g22480)          | 1.593  |

|           |                                                                                                                                                                                                              |                                                                                                                                                                                                                                                                                                       |        |
|-----------|--------------------------------------------------------------------------------------------------------------------------------------------------------------------------------------------------------------|-------------------------------------------------------------------------------------------------------------------------------------------------------------------------------------------------------------------------------------------------------------------------------------------------------|--------|
| Cs7g13170 | K00627 pyruvate dehydrogenase E2 component (dihydrolipoamide acetyltransferase) [EC:2.3.1.12]   (RefSeq) dihydrolipoamide acetyltransferase component 4 of pyruvate dehydrogenase complex, chloroplastic (A) | Dihydrolipoamide acetyltransferase component 4 of pyruvate dehydrogenase complex, chloroplastic; EC=2.3.1.12; Dihydrolipoamide S-acetyltransferase component 4 of pyruvate dehydrogenase complex; Pyruvate dehydrogenase complex component E2 4; PDC-E2 4; PDCE2 4; pE2; Flags: Precursor (At3g25860) | 1.902  |
| Cs2g03260 | K00162 pyruvate dehydrogenase E1 component beta subunit [EC:1.2.4.1]   (RefSeq) pyruvate dehydrogenase E1 component subunit beta-3, chloroplastic-like (A)                                                   | Pyruvate dehydrogenase E1 component subunit beta-3, chloroplastic; EC=1.2.4.1; Flags: Precursor (At2g34590)                                                                                                                                                                                           | 2.142  |
| Cs1g15840 | K00844 hexokinase [EC:2.7.1.1]   (RefSeq) hexokinase-1-like (A)                                                                                                                                              | Hexokinase-1; EC=2.7.1.1; NtHxK1 (At4g29130)                                                                                                                                                                                                                                                          | -2.510 |
| Cs7g26180 | K01689 enolase [EC:4.2.1.11]   (RefSeq) enolase 1, chloroplastic (A)                                                                                                                                         | Enolase 1, chloroplastic; EC=4.2.1.11; 2-phospho-D-glycerate hydro-lyase 1; 2-phosphoglycerate dehydratase 1; Flags: Precursor (At1g74030)                                                                                                                                                            | 1.238  |
| Cs1g15970 | K00850 6-phosphofructokinase 1 [EC:2.7.1.11]   (RefSeq) ATP-dependent 6-phosphofructokinase 3-like (A)                                                                                                       | ATP-dependent 6-phosphofructokinase 3 {ECO:0000255 HAMAP-Rule:MF_03186}; ATP-PFK 3 {ECO:0000255 HAMAP-Rule:MF_03186}; Phosphofructokinase 3 {ECO:0000255 HAMAP-Rule:MF_03186}; EC=2.7.1.11 {ECO:0000255 HAMAP-Rule:MF_03186}; Phosphohexokinase 3 {ECO:0000255 HAMAP-Rule:MF_03186} (At4g29220)       | 1.165  |
| Cs7g32500 | K01803 triosephosphate isomerase (TIM) [EC:5.3.1.1]   (RefSeq) triosephosphate isomerase, cytosolic (A)                                                                                                      | Triosephosphate isomerase, cytosolic; TIM; Triose-phosphate isomerase; EC=5.3.1.1 (At3g55440)                                                                                                                                                                                                         | -1.019 |
| novel.818 | K00134 glyceraldehyde 3-phosphate dehydrogenase [EC:1.2.1.12]   (RefSeq) glyceraldehyde-3-phosphate dehydrogenase GAPC1, cytosolic (A)                                                                       | Glyceraldehyde-3-phosphate dehydrogenase, cytosolic; EC=1.2.1.12; Flags: Fragment (At1g13440)                                                                                                                                                                                                         | -1.068 |
| Cs8g06950 | K00162 pyruvate dehydrogenase E1 component beta subunit [EC:1.2.4.1]   (RefSeq) pyruvate dehydrogenase E1 component subunit beta-3, chloroplastic (A)                                                        | Pyruvate dehydrogenase E1 component subunit beta-3, chloroplastic; EC=1.2.4.1; Flags: Precursor (At2g34590)                                                                                                                                                                                           | 1.832  |
| Cs5g01270 | K00161 pyruvate dehydrogenase E1 component alpha subunit [EC:1.2.4.1]   (RefSeq) pyruvate dehydrogenase E1 component subunit alpha-3, chloroplastic (A)                                                      | Pyruvate dehydrogenase E1 component subunit alpha-3, chloroplastic; EC=1.2.4.1; Flags: Precursor (At1g01090)                                                                                                                                                                                          | 1.356  |
| Cs7g15620 | K01114 phospholipase C [EC:3.1.4.3]   (RefSeq) non-specific phospholipase C4-like (A)                                                                                                                        | Non-specific phospholipase C4; EC=3.1.4.3 (At3g03530)                                                                                                                                                                                                                                                 | 1.735  |
| Cs4g18980 | K00850 6-phosphofructokinase 1 [EC:2.7.1.11]   (RefSeq) ATP-dependent 6-phosphofructokinase 6 (A)                                                                                                            | ATP-dependent 6-phosphofructokinase 3 {ECO:0000255 HAMAP-Rule:MF_03186}; ATP-PFK 3 {ECO:0000255 HAMAP-Rule:MF_03186}; Phosphofructokinase 3 {ECO:0000255 HAMAP-Rule:MF_03186}; EC=2.7.1.11 {ECO:0000255 HAMAP-Rule:MF_03186}; Phosphohexokinase 3 {ECO:0000255 HAMAP-Rule:MF_03186} (At4g32840)       | -2.038 |
| Cs7g02950 | K18696 glycerophosphodiester phosphodiesterase [EC:3.1.4.46]   (RefSeq) glycerophosphodiester phosphodiesterase GDDP3-like (A)                                                                               | Glycerophosphodiester phosphodiesterase GDDP3 {ECO:0000305}; EC=3.1.4.46 {ECO:0000250 UniProtKB:Q9SGA2}; Glycerophosphodiester phosphodiesterase 3 {ECO:0000303 PubMed:21323773}; ATGDDP3 {ECO:0000303 PubMed:21323773} (At3g02040)                                                                   | -1.648 |

|           |                                                                                                                                       |                                                                                                                                                                                                                                                                                                                                                                |        |
|-----------|---------------------------------------------------------------------------------------------------------------------------------------|----------------------------------------------------------------------------------------------------------------------------------------------------------------------------------------------------------------------------------------------------------------------------------------------------------------------------------------------------------------|--------|
| Cs7g22650 | --                                                                                                                                    | Type I inositol polyphosphate 5-phosphatase 2<br>{ECO:0000303 PubMed:11402208}; At5PTase2<br>{ECO:0000303 PubMed:11402208}; EC=3.1.3.56<br>{ECO:0000269 PubMed:11340187}; (At4g18010)                                                                                                                                                                          | 1.156  |
| Cs3g26050 | K00844 hexokinase [EC:2.7.1.1]   (RefSeq) hexokinase-2, chloroplastic (A)                                                             | Hexokinase-2, chloroplastic; EC=2.7.1.1; NtHxK2; Flags: Precursor (At1g47840)                                                                                                                                                                                                                                                                                  | 1.128  |
| Cs2g29630 | K01114 phospholipase C [EC:3.1.4.3]   (RefSeq) non-specific phospholipase C2 (A)                                                      | Non-specific phospholipase C2; EC=3.1.-.-; Flags: Precursor (At2g26870)                                                                                                                                                                                                                                                                                        | 1.499  |
| Cs3g24680 | K01520 dUTP pyrophosphatase [EC:3.6.1.23]   (RefSeq) deoxyuridine 5'-triphosphate nucleotidohydrolase (A)                             | Deoxyuridine 5'-triphosphate nucleotidohydrolase; dUTPase; EC=3.6.1.23; dUTP pyrophosphatase; dUTP-pyrophosphatase-like 1; AtDUT1 (At3g46940)                                                                                                                                                                                                                  | -1.325 |
|           |                                                                                                                                       |                                                                                                                                                                                                                                                                                                                                                                |        |
|           | <b>Phosphate ion transport (GO:0006817, P = 0.0427)</b>                                                                               |                                                                                                                                                                                                                                                                                                                                                                |        |
| Cs7g29450 | K08176 MFS transporter, PHS family, inorganic phosphate transporter   (RefSeq) probable inorganic phosphate transporter 1-3 (A)       | Probable inorganic phosphate transporter 1-3; AtPht1;3; H(+)/Pi cotransporter (At5g43360)                                                                                                                                                                                                                                                                      | 9.781  |
| Cs2g04480 | K14640 solute carrier family 20 (sodium-dependent phosphate transporter)   (RefSeq) sodium-dependent phosphate transporter 1-like (A) | Inorganic phosphate transporter 2-1, chloroplastic; H(+)/Pi cotransporter; AtPht2;1; Flags: Precursor (CE20573)                                                                                                                                                                                                                                                | 2.765  |
| Cs2g06030 | K10581 ubiquitin-conjugating enzyme E2 O [EC:2.3.2.24]   (RefSeq) probable ubiquitin-conjugating enzyme E2 24 (A)                     | Probable ubiquitin-conjugating enzyme E2 24<br>{ECO:0000303 PubMed:16339806}; EC=2.3.2.23 {ECO:0000305}; AtPHO2<br>{ECO:0000303 PubMed:16679424}; E2 ubiquitin-conjugating enzyme 24<br>{ECO:0000303 PubMed:16339806}; Ubiquitin carrier protein 24<br>{ECO:0000303 PubMed:16339806}; Ubiquitin-protein ligase 24<br>{ECO:0000303 PubMed:16339806} (At2g16920) | 2.991  |
| Cs4g04420 | K05658 ATP-binding cassette, subfamily B (MDR/TAP), member 1 [EC:3.6.3.44]   (RefSeq) ABC transporter B family member 13-like (A)     | ABC transporter I family member 17; ABC transporter ABCI.17; AtABCI17; MRP-related protein 1; Non-intrinsic ABC protein 3 (At1g67940)                                                                                                                                                                                                                          | -2.366 |
| Cs9g18560 | K08176 MFS transporter, PHS family, inorganic phosphate transporter   (RefSeq) inorganic phosphate transporter 1-11 (A)               | Inorganic phosphate transporter 1-11; OsPT11; OsPht1;11; H(+)/Pi cotransporter (At5g43360)                                                                                                                                                                                                                                                                     | 9.330  |
| Cs9g10540 | K08176 MFS transporter, PHS family, inorganic phosphate transporter   (RefSeq) probable inorganic phosphate transporter 1-7 (A)       | Probable inorganic phosphate transporter 1-7; AtPht1;7; H(+)/Pi cotransporter (At3g54700)                                                                                                                                                                                                                                                                      | 1.427  |
| Cs3g27870 | K19040 E3 ubiquitin-protein ligase ATL10/75/76/77/78 [EC:2.3.2.27]   (RefSeq) RING-H2 finger protein ATL74 (A)                        | RING-H2 finger protein ATL80; EC=2.3.2.27 {ECO:0000305}; RING-type E3 ubiquitin transferase ATL80 {ECO:0000305} (At1g20823)                                                                                                                                                                                                                                    | -1.213 |
|           |                                                                                                                                       |                                                                                                                                                                                                                                                                                                                                                                |        |
|           | <b>Inorganic phosphate transmembrane transporter activity (GO:0005315, P = 0.0090)</b>                                                |                                                                                                                                                                                                                                                                                                                                                                |        |
| Cs7g29450 | K08176 MFS transporter, PHS family, inorganic phosphate transporter   (RefSeq) probable inorganic phosphate transporter 1-3 (A)       | Probable inorganic phosphate transporter 1-3; AtPht1;3; H(+)/Pi cotransporter (At5g43360)                                                                                                                                                                                                                                                                      | 9.781  |
| Cs2g04480 | K14640 solute carrier family 20 (sodium-dependent phosphate transporter)   (RefSeq) sodium-dependent phosphate transporter 1-like (A) | Inorganic phosphate transporter 2-1, chloroplastic; H(+)/Pi cotransporter; AtPht2;1; Flags: Precursor (CE20573)                                                                                                                                                                                                                                                | 2.765  |

|                                                                           |                                                                                                                                                                                                       |                                                                                                                                                                                                                                                                                                                                                 |        |
|---------------------------------------------------------------------------|-------------------------------------------------------------------------------------------------------------------------------------------------------------------------------------------------------|-------------------------------------------------------------------------------------------------------------------------------------------------------------------------------------------------------------------------------------------------------------------------------------------------------------------------------------------------|--------|
| Cs4g04420                                                                 | K05658 ATP-binding cassette, subfamily B (MDR/TAP), member 1 [EC:3.6.3.44]   (RefSeq) ABC transporter B family member 13-like (A)                                                                     | ABC transporter I family member 17; ABC transporter ABCI.17; AtABCI17; MRP-related protein 1; Non-intrinsic ABC protein 3 (At1g67940)                                                                                                                                                                                                           | -2.366 |
| Cs9g18560                                                                 | K08176 MFS transporter, PHS family, inorganic phosphate transporter   (RefSeq) inorganic phosphate transporter 1-11 (A)                                                                               | Inorganic phosphate transporter 1-11; OsPT11; OsPht1;11; H(+)/Pi cotransporter (At5g43360)                                                                                                                                                                                                                                                      | 9.330  |
| orange1.1t00376                                                           | K08193 MFS transporter, ACS family, solute carrier family 17 (sodium-dependent inorganic phosphate cotransporter), other   (RefSeq) ascorbate transporter, chloroplastic isoform X1 (A)               | Ascorbate transporter, chloroplastic {ECO:0000303 PubMed:25557369}; Phosphate transporter PHT4;4; AtPHT4;4; Probable anion transporter 2; Flags: Precursor (At2g29650)                                                                                                                                                                          | 2.159  |
| Cs9g10540                                                                 | K08176 MFS transporter, PHS family, inorganic phosphate transporter   (RefSeq) probable inorganic phosphate transporter 1-7 (A)                                                                       | Probable inorganic phosphate transporter 1-7; AtPht1;7; H(+)/Pi cotransporter (At3g54700)                                                                                                                                                                                                                                                       | 1.427  |
| Cs8g19980                                                                 | K08193 MFS transporter, ACS family, solute carrier family 17 (sodium-dependent inorganic phosphate cotransporter), other   (RefSeq) sodium-dependent phosphate transport protein 1, chloroplastic (A) | Sodium-dependent phosphate transport protein 1, chloroplastic; Anion transporter 1; Na(+)/PI cotransporter 1; Phosphate transporter PHT4;1; Sodium/phosphate cotransporter 1; Flags: Precursor (At2g29650)                                                                                                                                      | 1.552  |
| Cs2g07720                                                                 | K15283 solute carrier family 35, member E1   (RefSeq) glucose-6-phosphate/phosphate translocator 2, chloroplastic (A)                                                                                 | Glucose-6-phosphate/phosphate translocator 2, chloroplastic; Flags: Precursor (At1g61800)                                                                                                                                                                                                                                                       | 1.148  |
| <b>Phosphate ion homeostasis (GO:0055062, P = 0.1400)</b>                 |                                                                                                                                                                                                       |                                                                                                                                                                                                                                                                                                                                                 |        |
| Cs2g06030                                                                 | K10581 ubiquitin-conjugating enzyme E2 O [EC:2.3.2.24]   (RefSeq) probable ubiquitin-conjugating enzyme E2 24 (A)                                                                                     | Probable ubiquitin-conjugating enzyme E2 24 {ECO:0000303 PubMed:16339806}; EC=2.3.2.23 {ECO:0000305}; AtPHO2 {ECO:0000303 PubMed:16679424}; E2 ubiquitin-conjugating enzyme 24 {ECO:0000303 PubMed:16339806}; Ubiquitin carrier protein 24 {ECO:0000303 PubMed:16339806}; Ubiquitin-protein ligase 24 {ECO:0000303 PubMed:16339806} (At2g16920) | 2.991  |
| Cs7g02950                                                                 | K18696 glycerophosphodiester phosphodiesterase [EC:3.1.4.46]   (RefSeq) glycerophosphodiester phosphodiesterase GDPD3-like (A)                                                                        | Glycerophosphodiester phosphodiesterase GDPD3 {ECO:0000305}; EC=3.1.4.46 {ECO:0000250 UniProtKB:Q9SGA2}; Glycerophosphodiester phosphodiesterase 3 {ECO:0000303 PubMed:21323773}; ATGDPD3 {ECO:0000303 PubMed:21323773} (At3g02040)                                                                                                             | -1.648 |
| Cs8g20150                                                                 | K07300 Ca <sup>2+</sup> :H <sup>+</sup> antiporter   (RefSeq) vacuolar cation/proton exchanger 3-like (A)                                                                                             | Vacuolar cation/proton exchanger 3; Ca(2+)/H(+) antiporter CAX3; Ca(2+)/H(+) exchanger 3; Protein CATION EXCHANGER 3 (At2g38170)                                                                                                                                                                                                                | 3.163  |
| Cs6g08320                                                                 | K07300 Ca <sup>2+</sup> :H <sup>+</sup> antiporter   (RefSeq) vacuolar cation/proton exchanger 3 (A)                                                                                                  | Vacuolar cation/proton exchanger 3; Ca(2+)/H(+) antiporter CAX3; Ca(2+)/H(+) exchanger 3; Protein CATION EXCHANGER 3 (At3g51860)                                                                                                                                                                                                                | 1.325  |
| <b>Cellular response to phosphate starvation (GO:0016036, P = 0.0136)</b> |                                                                                                                                                                                                       |                                                                                                                                                                                                                                                                                                                                                 |        |
| Cs1g20920                                                                 | K01610 phosphoenolpyruvate carboxykinase (ATP) [EC:4.1.1.49]   (RefSeq) phosphoenolpyruvate carboxykinase [ATP]-like (A)                                                                              | Phosphoenolpyruvate carboxykinase (ATP); PEP carboxykinase; PEPCK; EC=4.1.1.49 (At4g37870)                                                                                                                                                                                                                                                      | -1.471 |
| Cs2g06030                                                                 | K10581 ubiquitin-conjugating enzyme E2 O [EC:2.3.2.24]   (RefSeq) probable ubiquitin-conjugating enzyme E2 24 (A)                                                                                     | Probable ubiquitin-conjugating enzyme E2 24 {ECO:0000303 PubMed:16339806}; EC=2.3.2.23 {ECO:0000305}; AtPHO2 {ECO:0000303 PubMed:16679424}; E2 ubiquitin-conjugating enzyme 24                                                                                                                                                                  | 2.991  |

|                 |                                                                                                                                            |                                                                                                                                                                                                                                                                                                                                                                                    |        |
|-----------------|--------------------------------------------------------------------------------------------------------------------------------------------|------------------------------------------------------------------------------------------------------------------------------------------------------------------------------------------------------------------------------------------------------------------------------------------------------------------------------------------------------------------------------------|--------|
|                 |                                                                                                                                            | {ECO:0000303 PubMed:16339806}; Ubiquitin carrier protein 24 {ECO:0000303 PubMed:16339806}; Ubiquitin-protein ligase 24 {ECO:0000303 PubMed:16339806} (At2g16920)                                                                                                                                                                                                                   |        |
| Cs7g01770       | --                                                                                                                                         | Protein DETOXIFICATION 43 {ECO:0000303 PubMed:11739388}; AtDTX43 {ECO:0000303 PubMed:11739388}; Multidrug and toxic compound extrusion protein 43 {ECO:0000305}; MATE protein 43 {ECO:0000305}; Protein FERRIC REDUCTASE DEFECTIVE 3 {ECO:0000303 PubMed:12172022}; AtFRD3 {ECO:0000303 PubMed:12172022}; Protein MANGANESE ACCUMULATOR 1 {ECO:0000303 PubMed:8754685} (At3g08040) | -2.485 |
| Cs4g17870       | --                                                                                                                                         | SPX domain-containing protein 1 {ECO:0000303 PubMed:18315545}; Protein SPX DOMAIN GENE 1 {ECO:0000303 PubMed:18315545}; AtSPX1 {ECO:0000303 PubMed:18315545} (At5g20150)                                                                                                                                                                                                           | -3.166 |
| Cs1g12640       | --                                                                                                                                         | SPX domain-containing protein 1 {ECO:0000303 PubMed:18315545}; Protein SPX DOMAIN GENE 1 {ECO:0000303 PubMed:18315545}; AtSPX1 {ECO:0000303 PubMed:18315545} (At5g20150)                                                                                                                                                                                                           | 10.957 |
| Cs6g21550       | --                                                                                                                                         | SPX domain-containing protein 4; AltName: Full=Protein SPX DOMAIN GENE 4; AtSPX4 (At5g15330)                                                                                                                                                                                                                                                                                       | 1.868  |
| Cs9g09780       | --                                                                                                                                         | Phosphate transporter PHO1 {ECO:0000303 PubMed:11971143}; Protein PHO1 {ECO:0000303 PubMed:11971143}; AtPHO1 {ECO:0000303 PubMed:11971143} (At3g23430)                                                                                                                                                                                                                             | 1.782  |
| Cs4g05250       | K03715 1,2-diacylglycerol 3-beta-galactosyltransferase [EC:2.4.1.46]   (RefSeq) monogalactosyldiacylglycerol synthase 2, chloroplastic (A) | Monogalactosyldiacylglycerol synthase 2, chloroplastic; AtMGD2; EC=2.4.1.46; MGDG synthase type B; Flags: Precursor (At5g20410)                                                                                                                                                                                                                                                    | 2.246  |
| Cs2g17860       | K14489 arabidopsis histidine kinase 2/3/4 (cytokinin receptor) [EC:2.7.13.3]   (RefSeq) histidine kinase 4 (A)                             | Histidine kinase 4; EC=2.7.13.3; Arabidopsis histidine kinase 4; AtHK4; Cytokinin receptor CYTOKININ RESPONSE 1; AtCRE1; Cytokinin receptor CRE1; Phosphoprotein phosphatase AHK4; EC=3.1.3.16; Protein AUTHENTIC HIS-KINASE 4; Protein ROOT AS IN WOL 1; Protein WOODEN LEG (At5g35750)                                                                                           | -1.867 |
| orange1.1t04786 | --                                                                                                                                         | Multicopper oxidase LPR1; EC=1.-.-.-; Protein LOW PHOSPHATE ROOT 1; Flags: Precursor (At1g23010)                                                                                                                                                                                                                                                                                   | -1.004 |
| Cs2g06880       | K14485 transport inhibitor response 1   (RefSeq) protein TRANSPORT INHIBITOR RESPONSE 1 (A)                                                | Protein TRANSPORT INHIBITOR RESPONSE 1; Weak ethylene-insensitive protein 1 (At3g62980)                                                                                                                                                                                                                                                                                            | -2.644 |
| Cs1g14690       | --                                                                                                                                         | Multicopper oxidase LPR1; EC=1.-.-.-; Protein LOW PHOSPHATE ROOT 1; Flags: Precursor (At1g23010)                                                                                                                                                                                                                                                                                   | -2.072 |
| orange1.1t00194 | --                                                                                                                                         | SPX domain-containing protein 3; Protein SPX DOMAIN GENE 3; AtSPX3 (At2g45130)                                                                                                                                                                                                                                                                                                     | -1.120 |

|                                             |                                                                                                              |                                                                                                                                                                                                                       |        |
|---------------------------------------------|--------------------------------------------------------------------------------------------------------------|-----------------------------------------------------------------------------------------------------------------------------------------------------------------------------------------------------------------------|--------|
| orange1.1t03293                             | K14491 two-component response regulator ARR-B family   (RefSeq) two-component response regulator ORR24 (A)   | Protein PHR1-LIKE 2 {ECO:0000303 PubMed:26586833}; Myb family transcription factor PHL2 {ECO:0000303 PubMed:26586833} (At3g24120)                                                                                     | -1.197 |
| novel.500                                   | K14485 transport inhibitor response 1   (RefSeq) protein TRANSPORT INHIBITOR RESPONSE 1 (A)                  | Protein TRANSPORT INHIBITOR RESPONSE 1; Weak ethylene-insensitive protein 1 (At3g62980)                                                                                                                               | -1.609 |
|                                             |                                                                                                              |                                                                                                                                                                                                                       |        |
| <b><i>Other low-Pi-responsive genes</i></b> |                                                                                                              |                                                                                                                                                                                                                       |        |
| orange1.1t00583                             | K01507 inorganic pyrophosphatase [EC:3.6.1.1]   (RefSeq) soluble inorganic pyrophosphatase 1-like (A)        | Soluble inorganic pyrophosphatase 1 {ECO:0000303 PubMed:15135060}; EC=3.6.1.1 {ECO:0000269 Ref.9}; Pyrophosphate phospho-hydrolase 1 {ECO:0000303 PubMed:15135060}; PPase 1 {ECO:0000303 PubMed:15135060} (At1g01050) | 1.500  |
| Cs8g11340                                   | K22390 acid phosphatase type 7   (RefSeq) purple acid phosphatase 23 (A)                                     | Purple acid phosphatase 23; EC=3.1.3.2; Flags: Precursor (At4g13700)                                                                                                                                                  | 1.004  |
| Cs7g02530                                   | K22390 acid phosphatase type 7   (RefSeq) uncharacterized LOC102612489 (A)                                   | Probable inactive purple acid phosphatase 1; Flags: Precursor (At1g13750)                                                                                                                                             | 12.666 |
| Cs5g07300                                   | K22390 acid phosphatase type 7   (RefSeq) probable inactive purple acid phosphatase 27 (A)                   | Probable inactive purple acid phosphatase 27; Flags: Precursor (At1g13750)                                                                                                                                            | 1.674  |
| orange1.1t02445                             | K22390 acid phosphatase type 7   (RefSeq) purple acid phosphatase 15 (A)                                     | Purple acid phosphatase 15; EC=3.1.3.-; EC=3.1.3.2; Phytase; Flags: Precursor (At3g07130)                                                                                                                             | 2.645  |
| orange1.1t00652                             | --                                                                                                           | Probable inactive purple acid phosphatase 16; Flags: Precursor (At3g10150)                                                                                                                                            | 3.342  |
| Cs2g17980                                   | K14379 tartrate-resistant acid phosphatase type 5 [EC:3.1.3.2]   (RefSeq) purple acid phosphatase 8-like (A) | Purple acid phosphatase 8; EC=3.1.3.2; Flags: Precursor (At1g14700)                                                                                                                                                   | -1.448 |
| Cs5g29180                                   | --                                                                                                           | Acid phosphatase 1; EC=3.1.3.2; Apase-1(1); Flags: Precursor (At1g04040)                                                                                                                                              | -2.148 |
| Cs9g15370                                   | --                                                                                                           | Acid phosphatase 1; EC=3.1.3.2; Apase-1(1); Flags: Precursor (At4g25150)                                                                                                                                              | -1.360 |
| Cs6g01840                                   | --                                                                                                           | Acid phosphatase 1; EC=3.1.3.2; Apase-1(1); Flags: Precursor (At3g05890)                                                                                                                                              | -1.195 |
| Cs1g15940                                   | --                                                                                                           | Acid phosphatase 1; EC=3.1.3.2; Apase-1(1); Flags: Precursor (At5g51260)                                                                                                                                              | -1.787 |
| Cs3g25470                                   | K22390 acid phosphatase type 7   (RefSeq) purple acid phosphatase 2-like (A)                                 | Purple acid phosphatase 2; EC=3.1.3.2; Manganese(II) purple acid phosphatase 2; Precursor (At2g27190)                                                                                                                 | -2.311 |

**Table S15.** DEGs related to nucleotide metabolism in RN0

| Accession No.                                                          | KEGG annotation                                                                                                  | Swissprot annotation (KOG annotation)                                                                                                                                                                                                                                                                                            | Log <sub>2</sub> (FC) |
|------------------------------------------------------------------------|------------------------------------------------------------------------------------------------------------------|----------------------------------------------------------------------------------------------------------------------------------------------------------------------------------------------------------------------------------------------------------------------------------------------------------------------------------|-----------------------|
| <b><i>RNA degradation (ko03018, P = 1.0000)</i></b>                    |                                                                                                                  |                                                                                                                                                                                                                                                                                                                                  |                       |
| Cs1g15970                                                              | K00850 6-phosphofructokinase 1 [EC:2.7.1.11]   (RefSeq) ATP-dependent 6-phosphofructokinase 3-like (A)           | ATP-dependent 6-phosphofructokinase 3 {ECO:0000255 HAMAP-Rule:MF_03186}; ATP-PFK 3 {ECO:0000255 HAMAP-Rule:MF_03186}; Phosphofructokinase 3 {ECO:0000255 HAMAP-Rule:MF_03186}; EC=2.7.1.11 {ECO:0000255 HAMAP-Rule:MF_03186}; Phosphohexokinase 3 {ECO:0000255 HAMAP-Rule:MF_03186} (At4g29220)                                  | 1.165                 |
| Cs1g20200                                                              | K00850 6-phosphofructokinase 1 [EC:2.7.1.11]   (RefSeq) ATP-dependent 6-phosphofructokinase 5, chloroplastic (A) | ATP-dependent 6-phosphofructokinase 5, chloroplastic {ECO:0000255 HAMAP-Rule:MF_03186}; ATP-PFK 5 {ECO:0000255 HAMAP-Rule:MF_03186}; Phosphofructokinase 5 {ECO:0000255 HAMAP-Rule:MF_03186}; EC=2.7.1.11 {ECO:0000255 HAMAP-Rule:MF_03186}; Phosphohexokinase 5 {ECO:0000255 HAMAP-Rule:MF_03186}; Flags: Precursor (At2g22480) | 1.593                 |
| Cs4g18980                                                              | K00850 6-phosphofructokinase 1 [EC:2.7.1.11]   (RefSeq) ATP-dependent 6-phosphofructokinase 6 (A)                | ATP-dependent 6-phosphofructokinase 3 {ECO:0000255 HAMAP-Rule:MF_03186}; ATP-PFK 3 {ECO:0000255 HAMAP-Rule:MF_03186}; Phosphofructokinase 3 {ECO:0000255 HAMAP-Rule:MF_03186}; EC=2.7.1.11 {ECO:0000255 HAMAP-Rule:MF_03186}; Phosphohexokinase 3 {ECO:0000255 HAMAP-Rule:MF_03186} (At4g32840)                                  | -2.038                |
| Cs7g26180                                                              | K01689 enolase [EC:4.2.1.11]   (RefSeq) enolase 1, chloroplastic (A)                                             | Enolase 1, chloroplastic; EC=4.2.1.11; 2-phospho-D-glycerate hydro-lyase 1; 2-phosphoglycerate dehydratase 1; Flags: Precursor (At1g74030)                                                                                                                                                                                       | 1.238                 |
| Cs7g12310                                                              | K04077 chaperonin GroEL   (RefSeq) ruBisCO large subunit-binding protein subunit beta, chloroplastic (A)         | Chaperonin 60 subunit beta 4, chloroplastic; CPN-60 beta 4; Flags: Precursor (At1g26230)                                                                                                                                                                                                                                         | 2.753                 |
| orange1.1t01589                                                        | K12581 CCR4-NOT transcription complex subunit 7/8   (RefSeq) putative CCR4-associated factor 1 homolog 8 (A)     | Putative CCR4-associated factor 1 homolog 8; EC=3.1.13.4 (At3g44240)                                                                                                                                                                                                                                                             | 2.335                 |
| Cs6g06520                                                              | K12608 CCR4-NOT complex subunit CAF16   (RefSeq) ABC transporter I family member 20 (A)                          | ABC transporter I family member 20; ABC transporter ABCI.20; AtABCI20; GCN-related protein 3; Non-intrinsic ABC protein 9 (At5g02270)                                                                                                                                                                                            | -1.127                |
| Cs6g15830                                                              | K13126 polyadenylate-binding protein   (RefSeq) polyadenylate-binding protein 7 (A)                              | Polyadenylate-binding protein 7; PABP-7; Poly(A)-binding protein 7 (At2g36660)                                                                                                                                                                                                                                                   | -1.599                |
| <b><i>Nucleotide biosynthetic process (GO:0009165, P = 0.0512)</i></b> |                                                                                                                  |                                                                                                                                                                                                                                                                                                                                  |                       |
| Cs5g08370                                                              | K01535 H <sup>+</sup> -transporting ATPase [EC:3.6.3.6]   (RefSeq) ATPase 11, plasma membrane-type-like (A)      | ATPase 11, plasma membrane-type; EC=3.6.3.6; Proton pump 11 (At5g62670)                                                                                                                                                                                                                                                          | 8.092                 |
| Cs6g19330                                                              | K13800 UMP-CMP kinase [EC:2.7.4.14]   (RefSeq) UMP-CMP kinase 3-like (A)                                         | UMP-CMP kinase 3 {ECO:0000255 HAMAP-Rule:MF_03172}; EC=2.7.4.14 {ECO:0000255 HAMAP-Rule:MF_03172}; Deoxycytidylate kinase {ECO:0000255 HAMAP-Rule:MF_03172}; CK {ECO:0000255 HAMAP-                                                                                                                                              | 4.659                 |

|                 |                                                                                                                                                                                                                         |                                                                                                                                                                                                                                                                                                                                            |       |
|-----------------|-------------------------------------------------------------------------------------------------------------------------------------------------------------------------------------------------------------------------|--------------------------------------------------------------------------------------------------------------------------------------------------------------------------------------------------------------------------------------------------------------------------------------------------------------------------------------------|-------|
|                 |                                                                                                                                                                                                                         | Rule:MF_03172}; dCMP kinase {ECO:0000255 HAMAP-Rule:MF_03172}; Uridine monophosphate/cytidine monophosphate kinase {ECO:0000255 HAMAP-Rule:MF_03172}; UMP/CMP kinase {ECO:0000255 HAMAP-Rule:MF_03172}; UMP/CMPK {ECO:0000255 HAMAP-Rule:MF_03172} (At3g60180)                                                                             |       |
| Cs6g20790       | K09285 AP2-like factor, ANT lineage   (RefSeq) AP2-like ethylene-responsive transcription factor At1g16060 (A)                                                                                                          | Ethylene-responsive transcription factor WR11; Protein ACTIVATOR OF SPORAMIN::LUC 1; Protein WRINKLED 1 (At1g16060)                                                                                                                                                                                                                        | 6.927 |
| Cs7g04300       | K09285 AP2-like factor, ANT lineage   (RefSeq) AP2-like ethylene-responsive transcription factor At1g16060 (A)                                                                                                          | Ethylene-responsive transcription factor WR11; Protein ACTIVATOR OF SPORAMIN::LUC 1; Protein WRINKLED 1 (At5g17430)                                                                                                                                                                                                                        | 9.012 |
| Cs6g03440       | K01535 H+-transporting ATPase [EC:3.6.3.6]   (RefSeq) plasma membrane ATPase 1-like (A)                                                                                                                                 | Plasma membrane ATPase 1; EC=3.6.3.6; Proton pump 1 (At5g62670)                                                                                                                                                                                                                                                                            | 3.613 |
| Cs6g07610       | K01962 acetyl-CoA carboxylase carboxyl transferase subunit alpha [EC:6.4.1.2 2.1.3.15]   (RefSeq) acetyl-coenzyme A carboxylase carboxyl transferase subunit alpha, chloroplastic (A)                                   | Acetyl-coenzyme A carboxylase carboxyl transferase subunit alpha, chloroplastic; ACCase subunit alpha; Acetyl-CoA carboxylase carboxyltransferase subunit alpha; EC=6.4.1.2; Flags: Precursor (At2g38040)                                                                                                                                  | 2.188 |
| Cs6g03445       | K01535 H+-transporting ATPase [EC:3.6.3.6]   (RefSeq) ATPase 11, plasma membrane-type (A)                                                                                                                               | ATPase 4, plasma membrane-type; EC=3.6.3.6; Proton pump 4 (At1g80660)                                                                                                                                                                                                                                                                      | 3.771 |
| Cs4g04540       | K01961 acetyl-CoA carboxylase, biotin carboxylase subunit [EC:6.4.1.2 6.3.4.14]   (RefSeq) biotin carboxylase 2, chloroplastic (A)                                                                                      | Biotin carboxylase 2, chloroplastic; EC=6.3.4.14; Acetyl-CoA carboxylase subunit A 2; ACC; EC=6.4.1.2; Flags: Precursor (At5g35360)                                                                                                                                                                                                        | 2.293 |
| orange1.1t05835 | K00161 pyruvate dehydrogenase E1 component alpha subunit [EC:1.2.4.1]   (RefSeq) pyruvate dehydrogenase E1 component subunit alpha-3, chloroplastic (A)                                                                 | Pyruvate dehydrogenase E1 component subunit alpha-3, chloroplastic; EC=1.2.4.1; Flags: Precursor (At1g01090)                                                                                                                                                                                                                               | 2.430 |
| Cs6g03430       | K01535 H+-transporting ATPase [EC:3.6.3.6]   (RefSeq) plasma membrane ATPase 1-like (A)                                                                                                                                 | ATPase 7, plasma membrane-type; EC=3.6.3.6; Proton pump 7 (At3g60330)                                                                                                                                                                                                                                                                      | 4.784 |
| Cs3g22480       | K00627 pyruvate dehydrogenase E2 component (dihydrolipoamide acetyltransferase) [EC:2.3.1.12]   (RefSeq) dihydrolipoyllysine-residue acetyltransferase component 5 of pyruvate dehydrogenase complex, chloroplastic (A) | Dihydrolipoyllysine-residue acetyltransferase component 5 of pyruvate dehydrogenase complex, chloroplastic; EC=2.3.1.12; Dihydrolipoamide S-acetyltransferase component 5 of pyruvate dehydrogenase complex; Protein EMBRYO DEFECTIVE 3003; Pyruvate dehydrogenase complex component E2 5; PDC-E2 5; PDCE2 5; Flags: Precursor (At1g34430) | 2.150 |
| Cs9g02470       | K00382 dihydrolipoamide dehydrogenase [EC:1.8.1.4]   (RefSeq) dihydrolipoyl dehydrogenase 2, chloroplastic-like (A)                                                                                                     | Dihydrolipoyl dehydrogenase 1, chloroplastic; ptLPD1; EC=1.8.1.4; Dihydrolipoamide dehydrogenase 1; Protein LIPOAMIDE DEHYDROGENASE 1; Pyruvate dehydrogenase complex E3 subunit 1; E3-1; PDC-E3 1; Flags: Precursor (At3g16950)                                                                                                           | 2.130 |
| Cs1g20200       | K00850 6-phosphofructokinase 1 [EC:2.7.1.11]   (RefSeq) ATP-dependent 6-phosphofructokinase 5, chloroplastic (A)                                                                                                        | ATP-dependent 6-phosphofructokinase 5, chloroplastic {ECO:0000255 HAMAP-Rule:MF_03186}; ATP-PFK 5 {ECO:0000255 HAMAP-Rule:MF_03186}; Phosphofructokinase 5 {ECO:0000255 HAMAP-Rule:MF_03186}; EC=2.7.1.11                                                                                                                                  | 1.593 |

|           |                                                                                                                                                                                                              |                                                                                                                                                                                                                                                                                                        |        |
|-----------|--------------------------------------------------------------------------------------------------------------------------------------------------------------------------------------------------------------|--------------------------------------------------------------------------------------------------------------------------------------------------------------------------------------------------------------------------------------------------------------------------------------------------------|--------|
|           |                                                                                                                                                                                                              | {ECO:0000255 HAMAP-Rule:MF_03186}; Phosphohexokinase 5 {ECO:0000255 HAMAP-Rule:MF_03186}; Flags: Precursor (At2g22480)                                                                                                                                                                                 |        |
| Cs4g08160 | K00876 uridine kinase [EC:2.7.1.48]   (RefSeq) uridine kinase-like protein 3 (A)                                                                                                                             | Uridine kinase-like protein 3; Includes: Uridine kinase; UK; EC=2.7.1.48; Putative uracil phosphoribosyltransferase; UPRTase; EC=2.4.2.9; AltName: UMP pyrophosphorylase (At1g55810)                                                                                                                   | -1.131 |
| Cs7g13170 | K00627 pyruvate dehydrogenase E2 component (dihydrolipoamide acetyltransferase) [EC:2.3.1.12]   (RefSeq) dihydrolipoamide acetyltransferase component 4 of pyruvate dehydrogenase complex, chloroplastic (A) | Dihydrolipoamide acetyltransferase component 4 of pyruvate dehydrogenase complex, chloroplastic; EC=2.3.1.12; Dihydrolipoamide S-acetyltransferase component 4 of pyruvate dehydrogenase complex; Pyruvate dehydrogenase complex component E2 4; PDC-E2 4; PDCE2 4; pIE2; Flags: Precursor (At3g25860) | 1.902  |
| Cs2g03260 | K00162 pyruvate dehydrogenase E1 component beta subunit [EC:1.2.4.1]   (RefSeq) pyruvate dehydrogenase E1 component subunit beta-3, chloroplastic-like (A)                                                   | Pyruvate dehydrogenase E1 component subunit beta-3, chloroplastic; EC=1.2.4.1; Flags: Precursor (At2g34590)                                                                                                                                                                                            | 2.142  |
| Cs6g03420 | K01535 H <sup>+</sup> -transporting ATPase [EC:3.6.3.6]   (RefSeq) plasma membrane ATPase 1-like (A)                                                                                                         | Plasma membrane ATPase 1; EC=3.6.3.6; Proton pump 1 (At5g62670)                                                                                                                                                                                                                                        | 1.431  |
| Cs5g29670 | K06041 arabinose-5-phosphate isomerase [EC:5.3.1.13]   (RefSeq) probable arabinose 5-phosphate isomerase (A)                                                                                                 | Probable arabinose 5-phosphate isomerase; API; EC=5.3.1.13; CBS domain-containing protein CBSSIS1 (At3g54690)                                                                                                                                                                                          | -1.810 |
| Cs1g15840 | K00844 hexokinase [EC:2.7.1.1]   (RefSeq) hexokinase-1-like (A)                                                                                                                                              | Hexokinase-1; EC=2.7.1.1; NtHxK1 (At4g29130)                                                                                                                                                                                                                                                           | -2.510 |
| Cs8g06970 | K13513 lysocardiolipin and lysophospholipid acyltransferase [EC:2.3.1.-2.3.1.51]   (RefSeq) probable 1-acyl-sn-glycerol-3-phosphate acyltransferase 5 (A)                                                    | Probable 1-acyl-sn-glycerol-3-phosphate acyltransferase 5; EC=2.3.1.51; Lysophosphatidyl acyltransferase 5 (At3g18850)                                                                                                                                                                                 | -3.028 |
| Cs7g24930 | K00856 adenosine kinase [EC:2.7.1.20]   (RefSeq) adenosine kinase 2 (A)                                                                                                                                      | Adenosine kinase 2; AK 2; EC=2.7.1.20; Adenosine 5'-phosphotransferase 2 (At5g03300)                                                                                                                                                                                                                   | -1.198 |
| Cs7g26180 | K01689 enolase [EC:4.2.1.11]   (RefSeq) enolase 1, chloroplastic (A)                                                                                                                                         | Enolase 1, chloroplastic; EC=4.2.1.11; 2-phospho-D-glycerate hydro-lyase 1; 2-phosphoglycerate dehydratase 1; Flags: Precursor (At1g74030)                                                                                                                                                             | 1.238  |
| Cs2g28120 | K00278 L-aspartate oxidase [EC:1.4.3.16]   (RefSeq) L-aspartate oxidase, chloroplastic (A)                                                                                                                   | L-aspartate oxidase, chloroplastic; EC=1.4.3.16; Protein FLAGELLIN-INSENSITIVE 4; Flags: Precursor (At5g14760)                                                                                                                                                                                         | -1.382 |
| Cs1g15970 | K00850 6-phosphofructokinase 1 [EC:2.7.1.11]   (RefSeq) ATP-dependent 6-phosphofructokinase 3-like (A)                                                                                                       | ATP-dependent 6-phosphofructokinase 3 {ECO:0000255 HAMAP-Rule:MF_03186}; ATP-PFK 3 {ECO:0000255 HAMAP-Rule:MF_03186}; Phosphofructokinase 3 {ECO:0000255 HAMAP-Rule:MF_03186}; EC=2.7.1.11 {ECO:0000255 HAMAP-Rule:MF_03186}; Phosphohexokinase 3 {ECO:0000255 HAMAP-Rule:MF_03186} (At4g29220)        | 1.165  |
| Cs3g25560 | K02154 V-type H <sup>+</sup> -transporting ATPase subunit a   (RefSeq) V-type proton ATPase subunit a3 (A)                                                                                                   | V-type proton ATPase subunit a3; V-ATPase subunit a3; V-type proton ATPase 95 kDa subunit a isoform 3; V-ATPase 95 kDa isoform a3; Vacuolar H(+)-ATPase subunit a isoform 3; Vacuolar proton pump subunit a3; Vacuolar proton translocating ATPase 95 kDa subunit a isoform 3 (At4g39080)              | 1.143  |

|                     |                                                                                                                                                           |                                                                                                                                                                                                                                                                                                 |        |
|---------------------|-----------------------------------------------------------------------------------------------------------------------------------------------------------|-------------------------------------------------------------------------------------------------------------------------------------------------------------------------------------------------------------------------------------------------------------------------------------------------|--------|
| Cs7g32500           | K01803 triosephosphate isomerase (TIM) [EC:5.3.1.1]   (RefSeq) triosephosphate isomerase, cytosolic (A)                                                   | Triosephosphate isomerase, cytosolic; TIM; Triose-phosphate isomerase; EC=5.3.1.1 (At3g55440)                                                                                                                                                                                                   | -1.019 |
| Cs1g03320           | K01535 H+-transporting ATPase [EC:3.6.3.6]   (RefSeq) ATPase 11, plasma membrane-type (A)                                                                 | Plasma membrane ATPase 1; EC=3.6.3.6; Proton pump 1 (At2g44850_2)                                                                                                                                                                                                                               | 1.049  |
| novel.818           | K00134 glyceraldehyde 3-phosphate dehydrogenase [EC:1.2.1.12]   (RefSeq) glyceraldehyde-3-phosphate dehydrogenase GAPC1, cytosolic (A)                    | Glyceraldehyde-3-phosphate dehydrogenase, cytosolic; EC=1.2.1.12; Flags: Fragment (At1g13440)                                                                                                                                                                                                   | -1.068 |
| Cs7g30910           | K10808 ribonucleoside-diphosphate reductase subunit M2 [EC:1.17.4.1]   (RefSeq) ribonucleoside-diphosphate reductase small chain (A)                      | Ribonucleoside-diphosphate reductase small chain; EC=1.17.4.1; Ribonucleoside-diphosphate reductase R2 subunit; Ribonucleotide reductase small subunit (At3g27060)                                                                                                                              | -1.313 |
| Cs8g06950           | K00162 pyruvate dehydrogenase E1 component beta subunit [EC:1.2.4.1]   (RefSeq) pyruvate dehydrogenase E1 component subunit beta-3, chloroplastic (A)     | Pyruvate dehydrogenase E1 component subunit beta-3, chloroplastic; EC=1.2.4.1; Flags: Precursor (At2g34590)                                                                                                                                                                                     | 1.832  |
| Cs5g01270           | K00161 pyruvate dehydrogenase E1 component alpha subunit [EC:1.2.4.1]   (RefSeq) pyruvate dehydrogenase E1 component subunit alpha-3, chloroplastic (A)   | Pyruvate dehydrogenase E1 component subunit alpha-3, chloroplastic; EC=1.2.4.1; Flags: Precursor (At1g01090)                                                                                                                                                                                    | 1.356  |
| Cs7g12380           | K00876 uridine kinase [EC:2.7.1.48]   (RefSeq) uridine-cytidine kinase C (A)                                                                              | Uridine kinase-like protein 1, chloroplastic; Uridine kinase; UK; EC=2.7.1.48; Putative uracil phosphoribosyltransferase; UPRTase; EC=2.4.2.9; UMP pyrophosphorylase; Flags: Precursor (At1g26190)                                                                                              | -1.459 |
| Cs4g18980           | K00850 6-phosphofructokinase 1 [EC:2.7.1.11]   (RefSeq) ATP-dependent 6-phosphofructokinase 6 (A)                                                         | ATP-dependent 6-phosphofructokinase 3 {ECO:0000255 HAMAP-Rule:MF_03186}; ATP-PFK 3 {ECO:0000255 HAMAP-Rule:MF_03186}; Phosphofructokinase 3 {ECO:0000255 HAMAP-Rule:MF_03186}; EC=2.7.1.11 {ECO:0000255 HAMAP-Rule:MF_03186}; Phosphohexokinase 3 {ECO:0000255 HAMAP-Rule:MF_03186} (At4g32840) | -2.038 |
| Cs3g26050           | K00844 hexokinase [EC:2.7.1.1]   (RefSeq) hexokinase-2, chloroplastic (A)                                                                                 | Hexokinase-2, chloroplastic; EC=2.7.1.1; NtHxK2; Flags: Precursor (At1g47840)                                                                                                                                                                                                                   | 1.128  |
| Cs9g05930           | K10808 ribonucleoside-diphosphate reductase subunit M2 [EC:1.17.4.1]   (RefSeq) ribonucleoside-diphosphate reductase small chain A (A)                    | Ribonucleoside-diphosphate reductase small chain A; EC=1.17.4.1; Ribonucleoside-diphosphate reductase R2A subunit; AtRNR2; Protein R2at; Ribonucleotide reductase small subunit A (At3g23580)                                                                                                   | 1.069  |
| Cs2g12080           | K01937 CTP synthase [EC:6.3.4.2]   (RefSeq) CTP synthase (A)                                                                                              | (At1g30820)                                                                                                                                                                                                                                                                                     | -1.009 |
| Cs3g24680           | K01520 dUTP pyrophosphatase [EC:3.6.1.23]   (RefSeq) deoxyuridine 5'-triphosphate nucleotidohydrolase (A)                                                 | Deoxyuridine 5'-triphosphate nucleotidohydrolase; dUTPase; EC=3.6.1.23; dUTP pyrophosphatase; dUTP-pyrophosphatase-like 1; AtDUT1 (At3g46940)                                                                                                                                                   | -1.325 |
| orange1.1t0322<br>2 | K01937 CTP synthase [EC:6.3.4.2]   (RefSeq) CTP synthase (A)                                                                                              | (At3g12670)                                                                                                                                                                                                                                                                                     | -1.162 |
| Cs8g07410           | K13998 dihydrofolate reductase / thymidylate synthase [EC:1.5.1.3 2.1.1.45]   (RefSeq) bifunctional dihydrofolate reductase-thymidylate synthase-like (A) | Bifunctional dihydrofolate reductase-thymidylate synthase; DHFR-TS; Dihydrofolate reductase; EC=1.5.1.3; Thymidylate synthase; EC=2.1.1.45 (At4g34570_2)                                                                                                                                        | -1.139 |

|                                                                     |                                                                                                                                                                                                              |                                                                                                                                                                                                                                                                                                                                 |        |
|---------------------------------------------------------------------|--------------------------------------------------------------------------------------------------------------------------------------------------------------------------------------------------------------|---------------------------------------------------------------------------------------------------------------------------------------------------------------------------------------------------------------------------------------------------------------------------------------------------------------------------------|--------|
| Cs2g27070                                                           | K00876 uridine kinase [EC:2.7.1.48]   (RefSeq) uridine kinase-like protein 5 (A)                                                                                                                             | Uridine kinase-like protein 5; Probable uridine kinase; Short=UK; EC=2.7.1.48; Probable uracil phosphoribosyltransferase; UPRTase; EC=2.4.2.9; UMP pyrophosphorylase (At3g27440)                                                                                                                                                | 1.403  |
| orange1.1t02315                                                     | K01937 CTP synthase [EC:6.3.4.2]   (RefSeq) CTP synthase-like (A)                                                                                                                                            | (At3g12670)                                                                                                                                                                                                                                                                                                                     | -2.022 |
| <b><i>Nucleotide salvage (GO:0043173, P = 0.3046)</i></b>           |                                                                                                                                                                                                              |                                                                                                                                                                                                                                                                                                                                 |        |
| Cs4g08160                                                           | K00876 uridine kinase [EC:2.7.1.48]   (RefSeq) uridine kinase-like protein 3 (A)                                                                                                                             | Uridine kinase-like protein 3; Uridine kinase; UK; EC=2.7.1.48; Putative uracil phosphoribosyltransferase; UPRTase; EC=2.4.2.9; AltName: UMP pyrophosphorylase (At1g55810)                                                                                                                                                      | -1.131 |
| Cs7g24930                                                           | K00856 adenosine kinase [EC:2.7.1.20]   (RefSeq) adenosine kinase 2 (A)                                                                                                                                      | Adenosine kinase 2; AK 2; EC=2.7.1.20; Adenosine 5'-phosphotransferase 2 (At5g03300)                                                                                                                                                                                                                                            | -1.198 |
| Cs7g12380                                                           | K00876 uridine kinase [EC:2.7.1.48]   (RefSeq) uridine-cytidine kinase C (A)                                                                                                                                 | Uridine kinase-like protein 1, chloroplastic; Uridine kinase; UK; EC=2.7.1.48; Putative uracil phosphoribosyltransferase; UPRTase; EC=2.4.2.9; UMP pyrophosphorylase; Flags: Precursor (At1g26190)                                                                                                                              | -1.459 |
| Cs2g27070                                                           | K00876 uridine kinase [EC:2.7.1.48]   (RefSeq) uridine kinase-like protein 5 (A)                                                                                                                             | Uridine kinase-like protein 5; Probable uridine kinase; Short=UK; EC=2.7.1.48; Probable uracil phosphoribosyltransferase; UPRTase; EC=2.4.2.9; UMP pyrophosphorylase (At3g27440)                                                                                                                                                | 1.403  |
| <b><i>Nucleotide catabolic process (GO:0009166, P = 0.0027)</i></b> |                                                                                                                                                                                                              |                                                                                                                                                                                                                                                                                                                                 |        |
| Cs6g20790                                                           | K09285 AP2-like factor, ANT lineage   (RefSeq) AP2-like ethylene-responsive transcription factor At1g16060 (A)                                                                                               | Ethylene-responsive transcription factor WR11; Protein ACTIVATOR OF SPORAMIN::LUC 1; Protein WRINKLED 1 (At1g16060)                                                                                                                                                                                                             | 6.927  |
| Cs7g04300                                                           | K09285 AP2-like factor, ANT lineage   (RefSeq) AP2-like ethylene-responsive transcription factor At1g16060 (A)                                                                                               | Ethylene-responsive transcription factor WR11; Protein ACTIVATOR OF SPORAMIN::LUC 1; Protein WRINKLED 1 (At5g17430)                                                                                                                                                                                                             | 9.012  |
| orange1.1t05835                                                     | K00161 pyruvate dehydrogenase E1 component alpha subunit [EC:1.2.4.1]   (RefSeq) pyruvate dehydrogenase E1 component subunit alpha-3, chloroplastic (A)                                                      | Pyruvate dehydrogenase E1 component subunit alpha-3, chloroplastic; EC=1.2.4.1; Flags: Precursor (At1g01090)                                                                                                                                                                                                                    | 2.430  |
| Cs3g22480                                                           | K00627 pyruvate dehydrogenase E2 component (dihydrolipoamide acetyltransferase) [EC:2.3.1.12]   (RefSeq) dihydrolipoamide acetyltransferase component 5 of pyruvate dehydrogenase complex, chloroplastic (A) | Dihydrolipoamide acetyltransferase component 5 of pyruvate dehydrogenase complex, chloroplastic; EC=2.3.1.12; Dihydrolipoamide S-acetyltransferase component 5 of pyruvate dehydrogenase complex; Protein EMBRYO DEFECTIVE 3003; Pyruvate dehydrogenase complex component E2 5; PDC-E2 5; PDCE2 5; Flags: Precursor (At1g34430) | 2.150  |
| Cs1g20200                                                           | K00850 6-phosphofructokinase 1 [EC:2.7.1.11]   (RefSeq) ATP-dependent 6-phosphofructokinase 5, chloroplastic (A)                                                                                             | ATP-dependent 6-phosphofructokinase 5, chloroplastic {ECO:0000255 HAMAP-Rule:MF_03186}; ATP-PFK 5 {ECO:0000255 HAMAP-Rule:MF_03186}; Phosphofructokinase 5 {ECO:0000255 HAMAP-Rule:MF_03186}; EC=2.7.1.11                                                                                                                       | 1.593  |

|           |                                                                                                                                                                                                                        |                                                                                                                                                                                                                                                                                                                  |        |
|-----------|------------------------------------------------------------------------------------------------------------------------------------------------------------------------------------------------------------------------|------------------------------------------------------------------------------------------------------------------------------------------------------------------------------------------------------------------------------------------------------------------------------------------------------------------|--------|
|           |                                                                                                                                                                                                                        | {ECO:0000255 HAMAP-Rule:MF_03186}; Phosphohexokinase 5 {ECO:0000255 HAMAP-Rule:MF_03186}; Flags: Precursor (At2g22480)                                                                                                                                                                                           |        |
| Cs7g13170 | K00627 pyruvate dehydrogenase E2 component (dihydrolipoamide acetyltransferase) [EC:2.3.1.12]   (RefSeq) dihydrolipoalysine-residue acetyltransferase component 4 of pyruvate dehydrogenase complex, chloroplastic (A) | Dihydrolipoalysine-residue acetyltransferase component 4 of pyruvate dehydrogenase complex, chloroplastic; EC=2.3.1.12; Dihydrolipoamide S-acetyltransferase component 4 of pyruvate dehydrogenase complex; Pyruvate dehydrogenase complex component E2 4; PDC-E2 4; PDCE2 4; pLE2; Flags: Precursor (At3g25860) | 1.902  |
| Cs2g03260 | K00162 pyruvate dehydrogenase E1 component beta subunit [EC:1.2.4.1]   (RefSeq) pyruvate dehydrogenase E1 component subunit beta-3, chloroplastic-like (A)                                                             | Pyruvate dehydrogenase E1 component subunit beta-3, chloroplastic; EC=1.2.4.1; Flags: Precursor (At2g34590)                                                                                                                                                                                                      | 2.142  |
| Cs1g15840 | K00844 hexokinase [EC:2.7.1.1]   (RefSeq) hexokinase-1-like (A)                                                                                                                                                        | Hexokinase-1; EC=2.7.1.1; NtHxK1 (At4g29130)                                                                                                                                                                                                                                                                     | -2.510 |
| Cs7g26180 | K01689 enolase [EC:4.2.1.11]   (RefSeq) enolase 1, chloroplastic (A)                                                                                                                                                   | Enolase 1, chloroplastic; EC=4.2.1.11; 2-phospho-D-glycerate hydro-lyase 1; 2-phosphoglycerate dehydratase 1; Flags: Precursor (At1g74030)                                                                                                                                                                       | 1.238  |
| Cs1g15970 | K00850 6-phosphofructokinase 1 [EC:2.7.1.11]   (RefSeq) ATP-dependent 6-phosphofructokinase 3-like (A)                                                                                                                 | ATP-dependent 6-phosphofructokinase 3 {ECO:0000255 HAMAP-Rule:MF_03186}; ATP-PFK 3 {ECO:0000255 HAMAP-Rule:MF_03186}; Phosphofructokinase 3 {ECO:0000255 HAMAP-Rule:MF_03186}; EC=2.7.1.11 {ECO:0000255 HAMAP-Rule:MF_03186}; Phosphohexokinase 3 {ECO:0000255 HAMAP-Rule:MF_03186} (At4g29220)                  | 1.165  |
| Cs7g32500 | K01803 triosephosphate isomerase (TIM) [EC:5.3.1.1]   (RefSeq) triosephosphate isomerase, cytosolic (A)                                                                                                                | Triosephosphate isomerase, cytosolic; TIM; Triose-phosphate isomerase; EC=5.3.1.1 (At3g55440)                                                                                                                                                                                                                    | -1.019 |
| novel.818 | K00134 glyceraldehyde 3-phosphate dehydrogenase [EC:1.2.1.12]   (RefSeq) glyceraldehyde-3-phosphate dehydrogenase GAPC1, cytosolic (A)                                                                                 | Glyceraldehyde-3-phosphate dehydrogenase, cytosolic; EC=1.2.1.12; Flags: Fragment (At1g13440)                                                                                                                                                                                                                    | -1.068 |
| Cs8g06950 | K00162 pyruvate dehydrogenase E1 component beta subunit [EC:1.2.4.1]   (RefSeq) pyruvate dehydrogenase E1 component subunit beta-3, chloroplastic (A)                                                                  | Pyruvate dehydrogenase E1 component subunit beta-3, chloroplastic; EC=1.2.4.1; Flags: Precursor (At2g34590)                                                                                                                                                                                                      | 1.832  |
| Cs5g01270 | K00161 pyruvate dehydrogenase E1 component alpha subunit [EC:1.2.4.1]   (RefSeq) pyruvate dehydrogenase E1 component subunit alpha-3, chloroplastic (A)                                                                | Pyruvate dehydrogenase E1 component subunit alpha-3, chloroplastic; EC=1.2.4.1; Flags: Precursor (At1g01090)                                                                                                                                                                                                     | 1.356  |
| Cs4g18980 | K00850 6-phosphofructokinase 1 [EC:2.7.1.11]   (RefSeq) ATP-dependent 6-phosphofructokinase 6 (A)                                                                                                                      | ATP-dependent 6-phosphofructokinase 3 {ECO:0000255 HAMAP-Rule:MF_03186}; ATP-PFK 3 {ECO:0000255 HAMAP-Rule:MF_03186}; Phosphofructokinase 3 {ECO:0000255 HAMAP-Rule:MF_03186}; EC=2.7.1.11 {ECO:0000255 HAMAP-Rule:MF_03186}; Phosphohexokinase 3 {ECO:0000255 HAMAP-Rule:MF_03186} (At4g32840)                  | -2.038 |
| Cs3g26050 | K00844 hexokinase [EC:2.7.1.1]   (RefSeq) hexokinase-2, chloroplastic (A)                                                                                                                                              | Hexokinase-2, chloroplastic; EC=2.7.1.1; NtHxK2; Flags: Precursor (At1g47840)                                                                                                                                                                                                                                    | 1.128  |
| Cs3g24680 | K01520 dUTP pyrophosphatase [EC:3.6.1.23]   (RefSeq) deoxyuridine 5'-triphosphate nucleotidohydrolase (A)                                                                                                              | Deoxyuridine 5'-triphosphate nucleotidohydrolase; dUTPase; EC=3.6.1.23; dUTP pyrophosphatase; dUTP-pyrophosphatase-like 1; AtDUT1 (At3g46940)                                                                                                                                                                    | -1.325 |

**Table S16.** DEGs and DAMs related to secondary metabolism in RN0

| Accession No.                                                                | KEGG annotation                                                                                                                                                      | Swissprot annotation (KOG)                                                                                                                                                                                                                          | Log <sub>2</sub> (FC) |
|------------------------------------------------------------------------------|----------------------------------------------------------------------------------------------------------------------------------------------------------------------|-----------------------------------------------------------------------------------------------------------------------------------------------------------------------------------------------------------------------------------------------------|-----------------------|
| <b><i>Biosynthesis of secondary metabolites (ko01110, P &lt; 0.0001)</i></b> |                                                                                                                                                                      |                                                                                                                                                                                                                                                     |                       |
| orange1.1t03053                                                              | K00002 alcohol dehydrogenase (NADP+) [EC:1.1.1.2]   (RefSeq) aldo-keto reductase family 4 member C9-like (A)                                                         | NADPH-dependent aldo-keto reductase, chloroplastic {ECO:0000303 PubMed:21169366}; AtChIAKR {ECO:0000303 PubMed:21169366}; EC=1.1.1.- {ECO:0000269 PubMed:19616008, ECO:0000269 PubMed:21169366}; Aldo-keto reductase family 4 member C9 (At2g37770) | -1.761                |
| Cs2g26840                                                                    | K00006 glycerol-3-phosphate dehydrogenase (NAD+) [EC:1.1.1.8]   (RefSeq) glycerol-3-phosphate dehydrogenase [NAD(+)] (A)                                             | Glycerol-3-phosphate dehydrogenase [NAD(+)]; EC=1.1.1.8 (At5g40610)                                                                                                                                                                                 | 4.138                 |
| orange1.1t02914                                                              | K00006 glycerol-3-phosphate dehydrogenase (NAD+) [EC:1.1.1.8]   (RefSeq) glycerol-3-phosphate dehydrogenase [NAD(+)] GPDHC1, cytosolic (A)                           | Probable glycerol-3-phosphate dehydrogenase [NAD(+)] 1, cytosolic; EC=1.1.1.8 (At2g41540)                                                                                                                                                           | 3.566                 |
| Cs3g27760                                                                    | K00021 hydroxymethylglutaryl-CoA reductase (NADPH) [EC:1.1.1.34]   (RefSeq) 3-hydroxy-3-methylglutaryl-coenzyme A reductase 1 (A)                                    | 3-hydroxy-3-methylglutaryl-coenzyme A reductase 1; HMG-CoA reductase 1; EC=1.1.1.34 (At1g76490)                                                                                                                                                     | -1.330                |
| Cs1g03610                                                                    | K00025 malate dehydrogenase [EC:1.1.1.37]   (RefSeq) malate dehydrogenase, cytoplasmic-like (A)                                                                      | Malate dehydrogenase, cytoplasmic {ECO:0000303 Ref.1}; EC=1.1.1.37 {ECO:0000269 PubMed:23313174} (At1g04410)                                                                                                                                        | 1.196                 |
| novel.1025                                                                   | K00036 glucose-6-phosphate 1-dehydrogenase [EC:1.1.1.49 1.1.1.363]   (RefSeq) glucose-6-phosphate 1-dehydrogenase 4, chloroplastic-like (A)                          | Glucose-6-phosphate 1-dehydrogenase 4, chloroplastic; G6PD4; G6PDH4; EC=1.1.1.49; Flags: Precursor (At1g09420)                                                                                                                                      | -1.056                |
| Cs3g23090                                                                    | K00058 D-3-phosphoglycerate dehydrogenase / 2-oxoglutarate reductase [EC:1.1.1.95 1.1.1.399]   (RefSeq) D-3-phosphoglycerate dehydrogenase 3, chloroplastic-like (A) | D-3-phosphoglycerate dehydrogenase 3, chloroplastic; EC=1.1.1.95 {ECO:0000269 PubMed:24368794}; Flags: Precursor (At3g19480)                                                                                                                        | 1.418                 |
| Cs1g22910                                                                    | K00059 3-oxoacyl-[acyl-carrier protein] reductase [EC:1.1.1.100]   (RefSeq) short-chain type dehydrogenase/reductase-like (A)                                        | NADPH-dependent aldehyde reductase-like protein, chloroplastic {ECO:0000250 UniProtKB:Q9SQR2}; EC=1.1.1.- {ECO:0000250 UniProtKB:Q9SQR2}; Flags: Precursor (At3g50560)                                                                              | 2.950                 |
| Cs7g10260                                                                    | K00059 3-oxoacyl-[acyl-carrier protein] reductase [EC:1.1.1.100]   (RefSeq) 3-oxoacyl-[acyl-carrier-protein] reductase 4 (A)                                         | 3-oxoacyl-[acyl-carrier-protein] reductase, chloroplastic; EC=1.1.1.100; 3-ketoacyl-acyl carrier protein reductase; Flags: Precursor (At1g24360)                                                                                                    | 2.622                 |
| Cs3g17970                                                                    | K00121 S-(hydroxymethyl)glutathione dehydrogenase / alcohol dehydrogenase [EC:1.1.1.284 1.1.1.1]   (RefSeq) alcohol dehydrogenase-like 2 (A)                         | Alcohol dehydrogenase-like 2; EC=1.1.1.1 {ECO:0000250 UniProtKB:P06525} (At1g22440)                                                                                                                                                                 | -1.741                |
| Cs7g14420                                                                    | K00121 S-(hydroxymethyl)glutathione dehydrogenase / alcohol dehydrogenase [EC:1.1.1.284 1.1.1.1]   (RefSeq) alcohol dehydrogenase-like 2 (A)                         | Alcohol dehydrogenase-like 2; EC=1.1.1.1 {ECO:0000250 UniProtKB:P06525} (At1g22440)                                                                                                                                                                 | 1.064                 |
| orange1.1t05469                                                              | K00121 S-(hydroxymethyl)glutathione dehydrogenase / alcohol dehydrogenase [EC:1.1.1.284 1.1.1.1]   (RefSeq) alcohol dehydrogenase-like 2 (A)                         | Alcohol dehydrogenase-like 2; EC=1.1.1.1 {ECO:0000250 UniProtKB:P06525} (At1g22440)                                                                                                                                                                 | -1.458                |
| novel.2520                                                                   | K00121 S-(hydroxymethyl)glutathione dehydrogenase / alcohol dehydrogenase [EC:1.1.1.284 1.1.1.1]   (RefSeq) alcohol dehydrogenase-like 2 (A)                         | (At5g16660)                                                                                                                                                                                                                                         | 1.174                 |
| novel.818                                                                    | K00134 glyceraldehyde 3-phosphate dehydrogenase [EC:1.2.1.12]   (RefSeq) glyceraldehyde-3-phosphate dehydrogenase GAPC1, cytosolic (A)                               | Glyceraldehyde-3-phosphate dehydrogenase, cytosolic; EC=1.2.1.12; Flags: Fragment (At1g13440)                                                                                                                                                       | -1.068                |

|                 |                                                                                                                                                            |                                                                                                                                                                                                                                                                                                                                                                                              |       |
|-----------------|------------------------------------------------------------------------------------------------------------------------------------------------------------|----------------------------------------------------------------------------------------------------------------------------------------------------------------------------------------------------------------------------------------------------------------------------------------------------------------------------------------------------------------------------------------------|-------|
| Cs5g01270       | K00161 pyruvate dehydrogenase E1 component alpha subunit [EC:1.2.4.1]   (RefSeq) pyruvate dehydrogenase E1 component subunit alpha-3, chloroplastic (A)    | Pyruvate dehydrogenase E1 component subunit alpha-3, chloroplastic; EC=1.2.4.1; Flags: Precursor (At1g01090)                                                                                                                                                                                                                                                                                 | 1.356 |
| orange1.1t05835 | K00161 pyruvate dehydrogenase E1 component alpha subunit [EC:1.2.4.1]   (RefSeq) pyruvate dehydrogenase E1 component subunit alpha-3, chloroplastic (A)    | Pyruvate dehydrogenase E1 component subunit alpha-3, chloroplastic; EC=1.2.4.1; Flags: Precursor (At1g01090)                                                                                                                                                                                                                                                                                 | 2.430 |
| Cs2g03260       | K00162 pyruvate dehydrogenase E1 component beta subunit [EC:1.2.4.1]   (RefSeq) pyruvate dehydrogenase E1 component subunit beta-3, chloroplastic-like (A) | Pyruvate dehydrogenase E1 component subunit beta-3, chloroplastic; EC=1.2.4.1; Flags: Precursor (At2g34590)                                                                                                                                                                                                                                                                                  | 2.142 |
| Cs8g06950       | K00162 pyruvate dehydrogenase E1 component beta subunit [EC:1.2.4.1]   (RefSeq) pyruvate dehydrogenase E1 component subunit beta-3, chloroplastic (A)      | Pyruvate dehydrogenase E1 component subunit beta-3, chloroplastic; EC=1.2.4.1; Flags: Precursor (At2g34590)                                                                                                                                                                                                                                                                                  | 1.832 |
| orange1.1t02015 | K00208 enoyl-[acyl-carrier protein] reductase I [EC:1.3.1.9 1.3.1.10]   (RefSeq) enoyl-[acyl-carrier-protein] reductase [NADH], chloroplastic (A)          | Enoyl-[acyl-carrier-protein] reductase [NADH], chloroplastic; ENR; EC=1.3.1.9; NADH-dependent enoyl-ACP reductase 1; Protein MOSAIC DEATH 1; Flags: Precursor (At2g05990)                                                                                                                                                                                                                    | 2.201 |
| novel.1941      | K00208 enoyl-[acyl-carrier protein] reductase I [EC:1.3.1.9 1.3.1.10]   (RefSeq) enoyl-[acyl-carrier-protein] reductase [NADH], chloroplastic (A)          | Enoyl-[acyl-carrier-protein] reductase [NADH], chloroplastic; EC=1.3.1.9; NADH-dependent enoyl-ACP reductase; Flags: Precursor (At2g05990)                                                                                                                                                                                                                                                   | 9.786 |
| orange1.1t02489 | K00215 4-hydroxy-tetrahydronicotinamide reductase [EC:1.1.1.8]   (RefSeq) 4-hydroxy-tetrahydronicotinamide reductase 1, chloroplastic (A)                  | 4-hydroxy-tetrahydronicotinamide reductase 2, chloroplastic; HTPA reductase 2; EC=1.1.1.8; Flags: Precursor (At2g31840)                                                                                                                                                                                                                                                                      | 1.216 |
| Cs9g17640       | K00218 protochlorophyllide reductase [EC:1.3.1.33]   (RefSeq) protochlorophyllide reductase, chloroplastic (A)                                             | Short-chain dehydrogenase TIC 32, chloroplastic; EC=1.1.1.-; Translocon at the inner envelope membrane of chloroplasts 32; PsTIC32 (At4g11410)                                                                                                                                                                                                                                               | 1.161 |
| Cs2g12150       | K00224 chloroplastic oxoene reductase [EC:1.3.1.-]   (RefSeq) chloroplast envelope quinone oxidoreductase homolog (A)                                      | 2-alkenal reductase (NADP(+)-dependent); EC=1.3.1.102 {ECO:0000269 PubMed:17945329, ECO:0000269 Ref.3, ECO:0000269 Ref.4}; Alkenal double bond reductase; Allylic alcohol dehydrogenase 1 {ECO:0000303 PubMed:11117876}; allyl-ADH1 {ECO:0000303 PubMed:11117876}; Flavin-free double bond reductase {ECO:0000303 Ref.4}; NtDBR; Pulegone reductase {ECO:0000303 Ref.3}; NtRed-1 (At1g65560) | 2.963 |
| Cs5g20910       | K00224 chloroplastic oxoene reductase [EC:1.3.1.-]   (RefSeq) chloroplast envelope quinone oxidoreductase homolog (A)                                      | 2-alkenal reductase (NADP(+)-dependent); EC=1.3.1.102 {ECO:0000269 PubMed:17945329, ECO:0000269 Ref.3, ECO:0000269 Ref.4}; Alkenal double bond reductase; Allylic alcohol dehydrogenase 1 {ECO:0000303 PubMed:11117876}; allyl-ADH1 {ECO:0000303 PubMed:11117876}; Flavin-free double bond reductase {ECO:0000303 Ref.4}; NtDBR; Pulegone reductase {ECO:0000303 Ref.3}; NtRed-1 (At3g03080) | 2.204 |
| Cs5g27465       | K00224 chloroplastic oxoene reductase [EC:1.3.1.-]   (RefSeq) chloroplast envelope quinone oxidoreductase homolog (A)                                      | Chloroplast envelope quinone oxidoreductase homolog {ECO:0000303 PubMed:20424175}; ceQORH                                                                                                                                                                                                                                                                                                    | 1.579 |

|            |                                                                                                                       |                                                                                                                                                                                                                                                                                                                                                                                                                  |        |
|------------|-----------------------------------------------------------------------------------------------------------------------|------------------------------------------------------------------------------------------------------------------------------------------------------------------------------------------------------------------------------------------------------------------------------------------------------------------------------------------------------------------------------------------------------------------|--------|
|            |                                                                                                                       | {ECO:0000303 PubMed:20424175}; EC=1.3.1.-<br>{ECO:0000269 PubMed:26678323} (At4g13010)                                                                                                                                                                                                                                                                                                                           |        |
| Cs5g27470  | K00224 chloroplastic oxoene reductase [EC:1.3.1.-]   (RefSeq) chloroplast envelope quinone oxidoreductase homolog (A) | Chloroplast envelope quinone oxidoreductase homolog<br>{ECO:0000303 PubMed:20424175}; ceQORH<br>{ECO:0000303 PubMed:20424175}; EC=1.3.1.-<br>{ECO:0000269 PubMed:26678323} (At4g13010)                                                                                                                                                                                                                           | 1.437  |
| Cs8g05790  | K00224 chloroplastic oxoene reductase [EC:1.3.1.-]   (RefSeq) chloroplast envelope quinone oxidoreductase homolog (A) | 2-alkenal reductase (NADP(+)-dependent); EC=1.3.1.102<br>{ECO:0000269 PubMed:17945329, ECO:0000269 Ref.3,<br>ECO:0000269 Ref.4}; Alkenal double bond reductase; Allylic alcohol<br>dehydrogenase 1 {ECO:0000303 PubMed:11117876}; allyl-ADH1<br>{ECO:0000303 PubMed:11117876}; Flavin-free double bond reductase<br>{ECO:0000303 Ref.4}; NtDBR; Pulegone reductase {ECO:0000303 Ref.3};<br>NtRed-1 (At1g49670_2) | 1.471  |
| novel.1185 | K00224 chloroplastic oxoene reductase [EC:1.3.1.-]   (RefSeq) chloroplast envelope quinone oxidoreductase homolog (A) | Quinone-oxidoreductase homolog, chloroplastic; EC=1.-.-.-; ceQORH<br>(At4g13010)                                                                                                                                                                                                                                                                                                                                 | 7.800  |
| Cs6g08630  | K00232 acyl-CoA oxidase [EC:1.3.3.6]   (RefSeq) acyl-coenzyme A oxidase 4, peroxisomal-like (A)                       | Acyl-coenzyme A oxidase 4, peroxisomal; AOX 4; EC=1.3.3.6; G6p; Short-<br>chain acyl-CoA oxidase; AtCX4; AtG6; SAOX (At3g51840)                                                                                                                                                                                                                                                                                  | 1.544  |
| Cs9g03990  | K00249 acyl-CoA dehydrogenase [EC:1.3.8.7]   (RefSeq) probable acyl-CoA dehydrogenase IBR3 (A)                        | Probable acyl-CoA dehydrogenase IBR3 {ECO:0000305}; EC=1.3.99.-<br>{ECO:0000305}; Protein INDOLE-3-BUTYRIC ACID RESPONSE 3<br>{ECO:0000303 PubMed:17277896} (At3g06810)                                                                                                                                                                                                                                          | 1.044  |
| Cs5g06000  | K00276 primary-amine oxidase [EC:1.4.3.21]   (RefSeq) copper methylamine oxidase-like (A)                             | Primary amine oxidase; EC=1.4.3.21 {ECO:0000250 UniProtKB:P12807};<br>Amine oxidase [copper-containing]; Flags: Precursor (At2g42490)                                                                                                                                                                                                                                                                            | 1.248  |
| Cs5g09470  | K00276 primary-amine oxidase [EC:1.4.3.21]   (RefSeq) primary amine oxidase-like (A)                                  | Primary amine oxidase; EC=1.4.3.21 {ECO:0000250 UniProtKB:P46883};<br>Amine oxidase [copper-containing]; Flags: Precursor (At4g12290)                                                                                                                                                                                                                                                                            | 1.900  |
| Cs9g06770  | K00276 primary-amine oxidase [EC:1.4.3.21]   (RefSeq) primary amine oxidase-like (A)                                  | Primary amine oxidase; EC=1.4.3.21 {ECO:0000250 UniProtKB:P46883};<br>Amine oxidase [copper-containing]; Flags: Precursor; Fragment (At1g31700)                                                                                                                                                                                                                                                                  | 2.469  |
| Cs4g18520  | K00281 glycine dehydrogenase [EC:1.4.4.2]   (RefSeq) glycine dehydrogenase (decarboxylating), mitochondrial (A)       | Glycine dehydrogenase (decarboxylating) A, mitochondrial; EC=1.4.4.2;<br>Glycine cleavage system P protein A; Glycine decarboxylase A; Glycine<br>dehydrogenase (aminomethyl-transferring) A; Flags: Precursor (At4g33010)                                                                                                                                                                                       | -1.360 |
| Cs9g02470  | K00382 dihydrolipoamide dehydrogenase [EC:1.8.1.4]   (RefSeq) dihydrolipoyl dehydrogenase 2, chloroplastic-like (A)   | Dihydrolipoyl dehydrogenase 1, chloroplastic; ptLPD1; EC=1.8.1.4;<br>Dihydrolipoamide dehydrogenase 1; Protein LIPOAMIDE<br>DEHYDROGENASE 1; Pyruvate dehydrogenase complex E3 subunit 1; E3-<br>1; PDC-E3 1; Flags: Precursor (At3g16950)                                                                                                                                                                       | 2.130  |
| Cs1g15010  | K00430 peroxidase [EC:1.11.1.7]   (RefSeq) putative Peroxidase 48 (A)                                                 | Putative Peroxidase 48; Atperox P48; EC=1.11.1.7; Flags: Precursor<br>(At4g33870)                                                                                                                                                                                                                                                                                                                                | -2.263 |
| Cs1g19890  | K00430 peroxidase [EC:1.11.1.7]   (RefSeq) peroxidase 17 (A)                                                          | Peroxidase 17; Atperox P17; EC=1.11.1.7; ATP25a; Flags: Precursor<br>(At2g22420)                                                                                                                                                                                                                                                                                                                                 | -1.915 |

|           |                                                                                       |                                                                                                                |        |
|-----------|---------------------------------------------------------------------------------------|----------------------------------------------------------------------------------------------------------------|--------|
| Cs1g20230 | K00430 peroxidase [EC:1.11.1.7]   (RefSeq) peroxidase 4-like (A)                      | Peroxidase 4 {ECO:0000250 UniProtKB:Q42578}; EC=1.11.1.7; Flags: Precursor (At5g05340)                         | -2.964 |
| Cs1g21860 | K00430 peroxidase [EC:1.11.1.7]   (RefSeq) peroxidase 51-like (A)                     | Peroxidase 73; Atperox P73; EC=1.11.1.7; ATP10a; PRXR11; Flags: Precursor (At5g67400)                          | -2.185 |
| Cs1g24640 | K00430 peroxidase [EC:1.11.1.7]   (RefSeq) peroxidase 72 (A)                          | Peroxidase 72; Atperox P72; EC=1.11.1.7; ATP6a; PRXR8; Flags: Precursor (At5g66390)                            | -2.627 |
| Cs1g25930 | K00430 peroxidase [EC:1.11.1.7]   (RefSeq) peroxidase 64-like (A)                     | Peroxidase 64; Atperox P64; EC=1.11.1.7; ATP17a; PRXR4; Flags: Precursor (At5g42180)                           | -1.964 |
| Cs2g03110 | K00430 peroxidase [EC:1.11.1.7]   (RefSeq) peroxidase 42 (A)                          | Peroxidase 42; Atperox P42; EC=1.11.1.7; ATP1a/ATP1b; PRXR1; Flags: Precursor (At4g21960)                      | -1.812 |
| Cs2g05220 | K00430 peroxidase [EC:1.11.1.7]   (RefSeq) peroxidase 19 (A)                          | Peroxidase 19; Atperox P19; EC=1.11.1.7; ATP51; Flags: Precursor (At2g34060)                                   | -3.122 |
| Cs2g21810 | K00430 peroxidase [EC:1.11.1.7]   (RefSeq) peroxidase 27 (A)                          | Peroxidase 27; Atperox P27; EC=1.11.1.7; ATP12a; PRXR7; Flags: Precursor (At3g01190)                           | -2.629 |
| Cs2g21820 | K00430 peroxidase [EC:1.11.1.7]   (RefSeq) peroxidase 30 (A)                          | Peroxidase 30; Atperox P30; EC=1.11.1.7; ATP7a; PRXR9; Flags: Precursor (At3g21770)                            | -2.920 |
| Cs2g28110 | K00430 peroxidase [EC:1.11.1.7]   (RefSeq) peroxidase P7-like (A)                     | Peroxidase 4 {ECO:0000250 UniProtKB:Q42578}; EC=1.11.1.7; Flags: Precursor (At5g05340)                         | -1.149 |
| Cs3g02310 | K00430 peroxidase [EC:1.11.1.7]   (RefSeq) lignin-forming anionic peroxidase-like (A) | Lignin-forming anionic peroxidase; EC=1.11.1.7; Flags: Precursor (At1g14550)                                   | -2.149 |
| Cs3g20770 | K00430 peroxidase [EC:1.11.1.7]   (RefSeq) peroxidase 13 (A)                          | Peroxidase 13; Atperox P13; EC=1.11.1.7; Flags: Precursor (At1g77100_1)                                        | 8.534  |
| Cs3g21730 | K00430 peroxidase [EC:1.11.1.7]   (RefSeq) peroxidase 12 (A)                          | Peroxidase 12; Atperox P12; EC=1.11.1.7; ATP4a; PRXR6; Flags: Precursor (At1g71695)                            | -1.517 |
| Cs3g25300 | K00430 peroxidase [EC:1.11.1.7]   (RefSeq) peroxidase 9 (A)                           | Peroxidase 9; Atperox P9; EC=1.11.1.7; ATP18a; Flags: Precursor (At1g44970)                                    | -2.503 |
| Cs3g26600 | K00430 peroxidase [EC:1.11.1.7]   (RefSeq) peroxidase 64 (A)                          | Peroxidase 64; Atperox P64; EC=1.11.1.7; ATP17a; PRXR4; Flags: Precursor (At5g42180)                           | -2.278 |
| Cs4g17860 | K00430 peroxidase [EC:1.11.1.7]   (RefSeq) peroxidase 25 (A)                          | Peroxidase 25; Atperox P25; EC=1.11.1.7; Flags: Precursor (At2g41480)                                          | 1.546  |
| Cs5g32270 | K00430 peroxidase [EC:1.11.1.7]   (RefSeq) peroxidase 3 (A)                           | Peroxidase 3; Atperox P3; EC=1.11.1.7; ATPRC; RC13A; Rare cold-inducible protein; Flags: Precursor (At1g05260) | -2.477 |
| Cs6g04560 | K00430 peroxidase [EC:1.11.1.7]   (RefSeq) peroxidase 21 (A)                          | Peroxidase 21; Atperox P21; EC=1.11.1.7; ATP2a/ATP2b; PRXR5; Flags: Precursor (At2g37130)                      | -2.280 |
| Cs6g09680 | K00430 peroxidase [EC:1.11.1.7]   (RefSeq) cationic peroxidase 1-like (A)             | Cationic peroxidase 1; EC=1.11.1.7; PNPC1; Flags: Precursor (At5g05340)                                        | -2.115 |
| Cs6g20170 | K00430 peroxidase [EC:1.11.1.7]   (RefSeq) peroxidase 31-like (A)                     | Peroxidase 63; Atperox P63; EC=1.11.1.7; ATP26a; Flags: Precursor (At5g40150)                                  | -1.099 |

|                 |                                                                                                  |                                                                                                                                                                               |        |
|-----------------|--------------------------------------------------------------------------------------------------|-------------------------------------------------------------------------------------------------------------------------------------------------------------------------------|--------|
| Cs7g13530       | K00430 peroxidase [EC:1.11.1.7]   (RefSeq) peroxidase 65-like (A)                                | Peroxidase 65; Atperox P65; EC=1.11.1.7; ATP43; Flags: Precursor (At5g47000)                                                                                                  | -3.439 |
| Cs9g05130       | K00430 peroxidase [EC:1.11.1.7]   (RefSeq) peroxidase 3-like (A)                                 | Peroxidase 3; Atperox P3; EC=1.11.1.7; ATPRC; RCI3A; Rare cold-inducible protein; Flags: Precursor (At1g05260)                                                                | -2.828 |
| orange1.1t02033 | K00430 peroxidase [EC:1.11.1.7]   (RefSeq) peroxidase 59-like (A)                                | Peroxidase N; EC=1.11.1.7; Neutral peroxidase; Flags: Precursor (At5g19890)                                                                                                   | 1.411  |
| orange1.1t02041 | K00430 peroxidase [EC:1.11.1.7]   (RefSeq) peroxidase A2 (A)                                     | Peroxidase C3; EC=1.11.1.7; Flags: Precursor (At5g06720)                                                                                                                      | -1.448 |
| orange1.1t02044 | K00430 peroxidase [EC:1.11.1.7]   (RefSeq) peroxidase E5-like (A)                                | Peroxidase C3; EC=1.11.1.7; Flags: Precursor (At2g38390)                                                                                                                      | -1.910 |
| orange1.1t02045 | K00430 peroxidase [EC:1.11.1.7]   (RefSeq) peroxidase 15-like (A)                                | Peroxidase 15 {ECO:0000303 PubMed:17936696}; Prx15 {ECO:0000303 PubMed:17936696}; EC=1.11.1.7; Anionic peroxidase {ECO:0000303 PubMed:17936696}; Flags: Precursor (At5g06720) | -1.207 |
| orange1.1t02046 | K00430 peroxidase [EC:1.11.1.7]   (RefSeq) peroxidase A2 (A)                                     | Peroxidase 15 {ECO:0000303 PubMed:17936696}; Prx15 {ECO:0000303 PubMed:17936696}; EC=1.11.1.7; Anionic peroxidase {ECO:0000303 PubMed:17936696}; Flags: Precursor (At5g06730) | -1.040 |
| orange1.1t02225 | K00430 peroxidase [EC:1.11.1.7]   (RefSeq) LOW QUALITY PROTEIN: peroxidase A2-like (A)           | Peroxidase 53; Atperox P53; EC=1.11.1.7; ATPA2; Flags: Precursor (At5g06720)                                                                                                  | -1.825 |
| novel.242       | K00430 peroxidase [EC:1.11.1.7]   (RefSeq) peroxidase P7-like (A)                                | Peroxidase 52; Atperox P52; EC=1.11.1.7; ATP49; Flags: Precursor (At5g05340)                                                                                                  | -2.455 |
| orange1.1t03774 | K00454 lipoxygenase [EC:1.13.11.12]   (RefSeq) linoleate 13S-lipoxygenase 2-1, chloroplastic (A) | Linoleate 13S-lipoxygenase 2-1, chloroplastic; EC=1.13.11.12; Lipoxygenase 2-1; Flags: Precursor (At3g45140)                                                                  | -1.577 |
| orange1.1t03775 | K00454 lipoxygenase [EC:1.13.11.12]   (RefSeq) linoleate 13S-lipoxygenase 2-1, chloroplastic (A) | Linoleate 13S-lipoxygenase 2-1, chloroplastic; EC=1.13.11.12; Lipoxygenase 2-1; Flags: Precursor (At3g45140)                                                                  | -6.142 |
| orange1.1t04376 | K00454 lipoxygenase [EC:1.13.11.12]   (RefSeq) linoleate 13S-lipoxygenase 2-1, chloroplastic (A) | Linoleate 13S-lipoxygenase 2-1, chloroplastic; EC=1.13.11.12; Lipoxygenase 2-1; Flags: Precursor (At3g45140)                                                                  | -1.072 |
| novel.2136      | K00454 lipoxygenase [EC:1.13.11.12]   (RefSeq) linoleate 13S-lipoxygenase 2-1, chloroplastic (A) | Lipoxygenase 2, chloroplastic; AtLOX2; EC=1.13.11.12; Flags: Precursor (At1g17420)                                                                                            | -2.987 |
| novel.2137      | K00454 lipoxygenase [EC:1.13.11.12]   (RefSeq) linoleate 13S-lipoxygenase 2-1, chloroplastic (A) | Linoleate 13S-lipoxygenase 2-1, chloroplastic; EC=1.13.11.12; Lipoxygenase 2-1; Flags: Precursor (At3g45140)                                                                  | -3.653 |
| Cs1g21280       | K00511 squalene monooxygenase [EC:1.14.14.17]   (RefSeq) squalene epoxidase 3 (A)                | Squalene monooxygenase; EC=1.14.14.17 {ECO:0000250 UniProtKB:Q9SM02}; Squalene epoxidase; SE (At4g37760)                                                                      | -2.847 |
| Cs2g05890       | K00511 squalene monooxygenase [EC:1.14.14.17]   (RefSeq) squalene monooxygenase-like (A)         | Squalene monooxygenase; EC=1.14.14.17 {ECO:0000250 UniProtKB:Q9SM02}; Squalene epoxidase; SE (At4g37760)                                                                      | 1.779  |
| Cs4g04640       | K00511 squalene monooxygenase [EC:1.14.14.17]   (RefSeq) squalene epoxidase 3-like (A)           | Squalene epoxidase 3; AtSQE3; EC=1.14.14.17 {ECO:0000269 PubMed:17426032} (At4g37760)                                                                                         | 10.467 |
| Cs4g04650       | K00511 squalene monooxygenase [EC:1.14.14.17]   (RefSeq) squalene epoxidase 3-like (A)           | Squalene epoxidase 3; AtSQE3; EC=1.14.14.17 {ECO:0000269 PubMed:17426032} (At4g37760)                                                                                         | 7.030  |

|                 |                                                                                          |                                                                                                                                                                |       |
|-----------------|------------------------------------------------------------------------------------------|----------------------------------------------------------------------------------------------------------------------------------------------------------------|-------|
| Cs4g04670       | K00511 squalene monooxygenase [EC:1.14.14.17]   (RefSeq) squalene epoxidase 3-like (A)   | Squalene epoxidase 3; AtSQE3; EC=1.14.14.17 {ECO:0000269 PubMed:17426032} (At4g37760)                                                                          | 9.101 |
| Cs4g04710       | K00511 squalene monooxygenase [EC:1.14.14.17]   (RefSeq) squalene epoxidase 3-like (A)   | Squalene epoxidase 3; AtSQE3; EC=1.14.14.17 {ECO:0000269 PubMed:17426032} (At4g37760)                                                                          | 6.923 |
| Cs4g04720       | K00511 squalene monooxygenase [EC:1.14.14.17]   (RefSeq) squalene epoxidase 3-like (A)   | Squalene epoxidase 3; AtSQE3; EC=1.14.14.17 {ECO:0000269 PubMed:17426032} (At4g37760)                                                                          | 6.839 |
| Cs8g03350       | K00511 squalene monooxygenase [EC:1.14.14.17]   (RefSeq) squalene monooxygenase-like (A) | Squalene monooxygenase; EC=1.14.14.17 {ECO:0000250 UniProtKB:Q9SM02}; Squalene epoxidase; SE (At1g58440)                                                       | 1.906 |
| Cs8g03520       | K00511 squalene monooxygenase [EC:1.14.14.17]   (RefSeq) squalene monooxygenase-like (A) | Squalene epoxidase 1; AtSQE1; EC=1.14.14.17 {ECO:0000269 PubMed:17426032}; Protein DROUGHT HYPERSENSITIVE 2; Squalene monooxygenase; XF1 protein (At1g58440)   | 3.411 |
| Cs8g03530       | K00511 squalene monooxygenase [EC:1.14.14.17]   (RefSeq) squalene monooxygenase-like (A) | Squalene monooxygenase; EC=1.14.14.17 {ECO:0000250 UniProtKB:Q9SM02}; Squalene epoxidase; SE (At1g58440)                                                       | 2.787 |
| orange1.1t05606 | K00511 squalene monooxygenase [EC:1.14.14.17]   (RefSeq) squalene epoxidase 3-like (A)   | Squalene monooxygenase; EC=1.14.14.17 {ECO:0000250 UniProtKB:Q9SM02}; Squalene epoxidase; SE (At1g58440)                                                       | 8.416 |
| novel.670       | K00511 squalene monooxygenase [EC:1.14.14.17]   (RefSeq) squalene epoxidase 3-like (A)   | Squalene epoxidase 3; AtSQE3; EC=1.14.14.17 {ECO:0000269 PubMed:17426032} (At4g37760)                                                                          | 6.916 |
| Cs3g11040       | K00514 zeta-carotene desaturase [EC:1.3.5.6]   (RefSeq) CitZDS; ZDS (A)                  | Zeta-carotene desaturase, chloroplastic/chromoplastic; EC=1.3.5.6; 9,9'-di-cis-zeta-carotene desaturase; Carotene 7,8-desaturase; Flags: Precursor (At3g04870) | 4.260 |
| Cs3g11060       | K00514 zeta-carotene desaturase [EC:1.3.5.6]   (RefSeq) CitZDS; ZDS (A)                  | Zeta-carotene desaturase, chloroplastic/chromoplastic; EC=1.3.5.6; 9,9'-di-cis-zeta-carotene desaturase; Carotene 7,8-desaturase; Flags: Precursor (At3g04870) | 1.424 |
| Cs3g11170       | K00514 zeta-carotene desaturase [EC:1.3.5.6]   (RefSeq) CitZDS; ZDS (A)                  | Zeta-carotene desaturase, chloroplastic/chromoplastic; EC=1.3.5.6; 9,9'-di-cis-zeta-carotene desaturase; Carotene 7,8-desaturase; Flags: Precursor (At3g04870) | 2.234 |
| Cs3g11180       | K00514 zeta-carotene desaturase [EC:1.3.5.6]   (RefSeq) CitZDS; ZDS (A)                  | Zeta-carotene desaturase, chloroplastic/chromoplastic; EC=1.3.5.6; 9,9'-di-cis-zeta-carotene desaturase; Carotene 7,8-desaturase; Flags: Precursor (At3g04870) | 2.372 |
| Cs3g13040       | K00514 zeta-carotene desaturase [EC:1.3.5.6]   (RefSeq) CitZDS; ZDS (A)                  | Zeta-carotene desaturase, chloroplastic/chromoplastic; EC=1.3.5.6; 9,9'-di-cis-zeta-carotene desaturase; Carotene 7,8-desaturase; Flags: Precursor (At3g04870) | 1.803 |
| novel.551       | K00514 zeta-carotene desaturase [EC:1.3.5.6]   (RefSeq) CitZDS; ZDS (A)                  | Zeta-carotene desaturase, chloroplastic/chromoplastic; EC=1.3.5.6; 9,9'-di-cis-zeta-carotene desaturase; Carotene 7,8-desaturase; Flags: Precursor (At3g04870) | 2.213 |

|           |                                                                                                                                                                                                                        |                                                                                                                                                                                                                                                                                                                                           |        |
|-----------|------------------------------------------------------------------------------------------------------------------------------------------------------------------------------------------------------------------------|-------------------------------------------------------------------------------------------------------------------------------------------------------------------------------------------------------------------------------------------------------------------------------------------------------------------------------------------|--------|
| Cs9g07420 | K00547 homocysteine S-methyltransferase [EC:2.1.1.10]   (RefSeq) homocysteine S-methyltransferase 3 (A)                                                                                                                | Homocysteine S-methyltransferase 3; EC=2.1.1.10; S-methylmethionine:homocysteine methyltransferase 3; AtHMT-3; SMM:Hcy S-methyltransferase 3 (At3g22740)                                                                                                                                                                                  | -1.221 |
| Cs5g27000 | K00549 5-methyltetrahydropteroyltriglutamate--homocysteine methyltransferase [EC:2.1.1.14]   (RefSeq) 5-methyltetrahydropteroyltriglutamate--homocysteine methyltransferase 1 (A)                                      | 5-methyltetrahydropteroyltriglutamate--homocysteine methyltransferase 1; EC=2.1.1.14; Cobalamin-independent methionine synthase 1; AtMS1; Vitamin-B12-independent methionine synthase 1 (At5g17920)                                                                                                                                       | -1.133 |
| Cs5g27040 | K00549 5-methyltetrahydropteroyltriglutamate--homocysteine methyltransferase [EC:2.1.1.14]   (RefSeq) 5-methyltetrahydropteroyltriglutamate--homocysteine methyltransferase 1-like (A)                                 | 5-methyltetrahydropteroyltriglutamate--homocysteine methyltransferase 1; EC=2.1.1.14; Cobalamin-independent methionine synthase 1; AtMS1; Vitamin-B12-independent methionine synthase 1 (At5g17920)                                                                                                                                       | -1.024 |
| Cs1g22450 | K00588 caffeoyl-CoA O-methyltransferase [EC:2.1.1.104]   (RefSeq) caffeoyl-CoA O-methyltransferase-like (A)                                                                                                            | Caffeoyl-CoA O-methyltransferase; EC=2.1.1.104; Trans-caffeoyl-CoA 3-O-methyltransferase; CCoAMT; CCoAOMT (At4g34050)                                                                                                                                                                                                                     | -1.416 |
| Cs4g13440 | K00588 caffeoyl-CoA O-methyltransferase [EC:2.1.1.104]   (RefSeq) probable caffeoyl-CoA O-methyltransferase At4g26220 (A)                                                                                              | Probable caffeoyl-CoA O-methyltransferase At4g26220; EC=2.1.1.104; Trans-caffeoyl-CoA 3-O-methyltransferase; CCoAMT; CCoAOMT (At4g26220)                                                                                                                                                                                                  | -1.712 |
| Cs6g04150 | K00588 caffeoyl-CoA O-methyltransferase [EC:2.1.1.104]   (RefSeq) caffeoyl-CoA O-methyltransferase-like (A)                                                                                                            | Caffeoyl-CoA O-methyltransferase; EC=2.1.1.104; Trans-caffeoyl-CoA 3-O-methyltransferase; CCoAMT; CCoAOMT (At4g34050)                                                                                                                                                                                                                     | -1.272 |
| novel.780 | K00600 glycine hydroxymethyltransferase [EC:2.1.2.1]   (RefSeq) serine hydroxymethyltransferase 3, chloroplastic (A)                                                                                                   | Serine hydroxymethyltransferase 3, chloroplastic; AtSHMT3; EC=2.1.2.1; Glycine hydroxymethyltransferase 3; Serine methylase 3; Flags: Precursor (At4g32520)                                                                                                                                                                               | 3.137  |
| Cs5g09210 | K00616 transaldolase [EC:2.2.1.2]   (RefSeq) transaldolase (A)                                                                                                                                                         | (At1g12230)                                                                                                                                                                                                                                                                                                                               | 1.331  |
| Cs3g22480 | K00627 pyruvate dehydrogenase E2 component (dihydrolipoamide acetyltransferase) [EC:2.3.1.12]   (RefSeq) dihydrolipoalysine-residue acetyltransferase component 5 of pyruvate dehydrogenase complex, chloroplastic (A) | Dihydrolipoalysine-residue acetyltransferase component 5 of pyruvate dehydrogenase complex, chloroplastic; EC=2.3.1.12; Dihydrolipoamide S-acetyltransferase component 5 of pyruvate dehydrogenase complex; Protein EMBRYO DEFECTIVE 3003; Pyruvate dehydrogenase complex component E2 5; PDC-E2 5; PDCE2 5; Flags: Precursor (At1g34430) | 2.150  |
| Cs7g13170 | K00627 pyruvate dehydrogenase E2 component (dihydrolipoamide acetyltransferase) [EC:2.3.1.12]   (RefSeq) dihydrolipoalysine-residue acetyltransferase component 4 of pyruvate dehydrogenase complex, chloroplastic (A) | Dihydrolipoalysine-residue acetyltransferase component 4 of pyruvate dehydrogenase complex, chloroplastic; EC=2.3.1.12; Dihydrolipoamide S-acetyltransferase component 4 of pyruvate dehydrogenase complex; Pyruvate dehydrogenase complex component E2 4; PDC-E2 4; PDCE2 4; pIE2; Flags: Precursor (At3g25860)                          | 1.902  |
| Cs4g08990 | K00640 serine O-acetyltransferase [EC:2.3.1.30]   (RefSeq) serine acetyltransferase 1, chloroplastic-like (A)                                                                                                          | Serine acetyltransferase 3, mitochondrial; AtSAT-3; AtSERAT2; SAT-m; EC=2.3.1.30; Flags: Precursor (At3g13110)                                                                                                                                                                                                                            | 1.245  |
| Cs8g20810 | K00645 [acyl-carrier-protein] S-malonyltransferase [EC:2.3.1.39]   (RefSeq) malonyl CoA-acyl carrier protein transacylase (A)                                                                                          | (At2g30200)                                                                                                                                                                                                                                                                                                                               | 2.183  |
| Cs3g20330 | K00660 chalcone synthase [EC:2.3.1.74]   (RefSeq) chalcone synthase-like (A)                                                                                                                                           | Chalcone synthase; EC=2.3.1.74; Naringenin-chalcone synthase (At5g13930)                                                                                                                                                                                                                                                                  | 2.641  |

|           |                                                                                                                                  |                                                                                                                                                                                                                                                                                                 |        |
|-----------|----------------------------------------------------------------------------------------------------------------------------------|-------------------------------------------------------------------------------------------------------------------------------------------------------------------------------------------------------------------------------------------------------------------------------------------------|--------|
| Cs8g09800 | K00660 chalcone synthase [EC:2.3.1.74]   (RefSeq) chalcone synthase 2-like (A)                                                   | Chalcone synthase 2; EC=2.3.1.74; Naringenin-chalcone synthase 2 (At5g13930)                                                                                                                                                                                                                    | -2.180 |
| Cs8g09910 | K00660 chalcone synthase [EC:2.3.1.74]   (RefSeq) chalcone synthase-like (A)                                                     | Chalcone synthase; EC=2.3.1.74; Naringenin-chalcone synthase (At5g13930)                                                                                                                                                                                                                        | -2.151 |
| Cs9g11190 | K00660 chalcone synthase [EC:2.3.1.74]   (RefSeq) chalcone synthase 1 (A)                                                        | Chalcone synthase 1; EC=2.3.1.74; Naringenin-chalcone synthase 1 (At5g13930)                                                                                                                                                                                                                    | 5.344  |
| Cs5g33470 | K00695 sucrose synthase [EC:2.4.1.13]   (RefSeq) sucrose synthase 2 (A)                                                          | Sucrose synthase 2; EC=2.4.1.13; Sucrose-UDP glucosyltransferase 2 (At4g02280)                                                                                                                                                                                                                  | -1.719 |
| Cs6g15930 | K00695 sucrose synthase [EC:2.4.1.13]   (RefSeq) sucrose synthase 5 (A)                                                          | Sucrose synthase 6; AtSUS6; EC=2.4.1.13; Sucrose-UDP glucosyltransferase 6 (At1g73370)                                                                                                                                                                                                          | -1.069 |
| Cs9g03980 | K00695 sucrose synthase [EC:2.4.1.13]   (RefSeq) sucrose synthase 2-like (A)                                                     | Sucrose synthase 2; AtSUS2; EC=2.4.1.13; Sucrose-UDP glucosyltransferase 2 (At5g49190)                                                                                                                                                                                                          | -1.584 |
| Cs3g07650 | K00791 tRNA dimethylallyltransferase [EC:2.5.1.75]   (RefSeq) tRNA dimethylallyltransferase 2 (A)                                | tRNA dimethylallyltransferase 2; EC=2.5.1.75; Isopentenyl-diphosphate: tRNA isopentenyltransferase 2; AtIPT2; IPP transferase 2; IPPT 2 (At2g27760)                                                                                                                                             | 1.148  |
| Cs2g23850 | K00815 tyrosine aminotransferase [EC:2.6.1.5]   (RefSeq) probable aminotransferase TAT2 (A)                                      | Probable aminotransferase TAT2; EC=2.6.1.-; Tyrosine aminotransferase 2 (At5g53970)                                                                                                                                                                                                             | 1.040  |
| Cs2g23860 | K00815 tyrosine aminotransferase [EC:2.6.1.5]   (RefSeq) probable aminotransferase TAT2 (A)                                      | Probable aminotransferase TAT2; EC=2.6.1.-; Tyrosine aminotransferase 2 (At5g53970)                                                                                                                                                                                                             | 2.234  |
| Cs8g03420 | K00826 branched-chain amino acid aminotransferase [EC:2.6.1.42]   (RefSeq) branched-chain-amino-acid aminotransferase 6-like (A) | Branched-chain amino acid aminotransferase 2, chloroplastic {ECO:0000303 PubMed:23347725}; HIBCAT2 {ECO:0000303 PubMed:23347725}; EC=2.6.1.42 {ECO:0000269 PubMed:23347725}; Flags: Precursor (At1g50110)                                                                                       | 2.136  |
| Cs1g15840 | K00844 hexokinase [EC:2.7.1.1]   (RefSeq) hexokinase-1-like (A)                                                                  | Hexokinase-1; EC=2.7.1.1; NtHxK1 (At4g29130)                                                                                                                                                                                                                                                    | -2.510 |
| Cs3g26050 | K00844 hexokinase [EC:2.7.1.1]   (RefSeq) hexokinase-2, chloroplastic (A)                                                        | Hexokinase-2, chloroplastic; EC=2.7.1.1; NtHxK2; Flags: Precursor (At1g47840)                                                                                                                                                                                                                   | 1.128  |
| Cs6g17600 | K00847 fructokinase [EC:2.7.1.4]   (RefSeq) probable fructokinase-6, chloroplastic (A)                                           | Probable fructokinase-6, chloroplastic; EC=2.7.1.4; Flags: Precursor (At1g66430)                                                                                                                                                                                                                | 2.521  |
| Cs1g15970 | K00850 6-phosphofructokinase 1 [EC:2.7.1.11]   (RefSeq) ATP-dependent 6-phosphofructokinase 3-like (A)                           | ATP-dependent 6-phosphofructokinase 3 {ECO:0000255 HAMAP-Rule:MF_03186}; ATP-PFK 3 {ECO:0000255 HAMAP-Rule:MF_03186}; Phosphofructokinase 3 {ECO:0000255 HAMAP-Rule:MF_03186}; EC=2.7.1.11 {ECO:0000255 HAMAP-Rule:MF_03186}; Phosphohexokinase 3 {ECO:0000255 HAMAP-Rule:MF_03186} (At4g29220) | 1.165  |
| Cs1g20200 | K00850 6-phosphofructokinase 1 [EC:2.7.1.11]   (RefSeq) ATP-dependent 6-phosphofructokinase 5, chloroplastic (A)                 | ATP-dependent 6-phosphofructokinase 5, chloroplastic {ECO:0000255 HAMAP-Rule:MF_03186}; ATP-PFK 5 {ECO:0000255 HAMAP-Rule:MF_03186}; Phosphofructokinase 5 {ECO:0000255 HAMAP-Rule:MF_03186}; EC=2.7.1.11                                                                                       | 1.593  |

|            |                                                                                                                                                                |                                                                                                                                                                                                                                                                                                 |        |
|------------|----------------------------------------------------------------------------------------------------------------------------------------------------------------|-------------------------------------------------------------------------------------------------------------------------------------------------------------------------------------------------------------------------------------------------------------------------------------------------|--------|
|            |                                                                                                                                                                | {ECO:0000255 HAMAP-Rule:MF_03186}; Phosphohexokinase 5 {ECO:0000255 HAMAP-Rule:MF_03186}; Flags: Precursor (At2g22480)                                                                                                                                                                          |        |
| Cs4g18980  | K00850 6-phosphofructokinase 1 [EC:2.7.1.11]   (RefSeq) ATP-dependent 6-phosphofructokinase 6 (A)                                                              | ATP-dependent 6-phosphofructokinase 3 {ECO:0000255 HAMAP-Rule:MF_03186}; ATP-PFK 3 {ECO:0000255 HAMAP-Rule:MF_03186}; Phosphofructokinase 3 {ECO:0000255 HAMAP-Rule:MF_03186}; EC=2.7.1.11 {ECO:0000255 HAMAP-Rule:MF_03186}; Phosphohexokinase 3 {ECO:0000255 HAMAP-Rule:MF_03186} (At4g32840) | -2.038 |
| Cs8g03650  | K00873 pyruvate kinase [EC:2.7.1.40]   (RefSeq) pyruvate kinase isozyme A, chloroplastic-like (A)                                                              | Pyruvate kinase isozyme A, chloroplastic; EC=2.7.1.40; Flags: Precursor (At3g22960)                                                                                                                                                                                                             | 2.299  |
| Cs9g07880  | K00873 pyruvate kinase [EC:2.7.1.40]   (RefSeq) pyruvate kinase isozyme A, chloroplastic (A)                                                                   | Pyruvate kinase isozyme A, chloroplastic; EC=2.7.1.40; Flags: Precursor (At3g22960)                                                                                                                                                                                                             | 1.213  |
| Cs9g18710  | K00873 pyruvate kinase [EC:2.7.1.40]   (RefSeq) plastidial pyruvate kinase 2 (A)                                                                               | Plastidial pyruvate kinase 2; PKp2; EC=2.7.1.40; Plastidial pyruvate kinase 1; PKP1; Pyruvate kinase III; Pyruvate kinase isozyme B1, chloroplastic; PKP-BETA1; Plastidic pyruvate kinase beta subunit 1; Flags: Precursor (At5g52920)                                                          | 1.963  |
| Cs5g11570  | K00901 diacylglycerol kinase (ATP) [EC:2.7.1.107]   (RefSeq) diacylglycerol kinase 1 (A)                                                                       | Diacylglycerol kinase 1; AtDGK1; DAG kinase 1; EC=2.7.1.107; Diglyceride kinase 1; DGK 1 (At5g07920)                                                                                                                                                                                            | 1.587  |
| Cs2g14460  | K00928 aspartate kinase [EC:2.7.2.4]   (RefSeq) aspartokinase 2, chloroplastic-like (A)                                                                        | Aspartokinase 3, chloroplastic; EC=2.7.2.4; Aspartate kinase 3; Flags: Precursor (At3g02020)                                                                                                                                                                                                    | -1.272 |
| Cs4g01290  | K00939 adenylate kinase [EC:2.7.4.3]   (RefSeq) adenylate kinase 5, chloroplastic (A)                                                                          | Adenylate kinase 5, chloroplastic; EC=2.7.4.3; ATP-AMP transphosphorylase 5; ATP:AMP phosphotransferase; Adenylate monophosphate kinase 5; AMK5; Flags: Precursor (At5g35170)                                                                                                                   | 2.117  |
| Cs7g10390  | K00939 adenylate kinase [EC:2.7.4.3]   (RefSeq) adenylate kinase 4-like (A)                                                                                    | Adenylate kinase 4; EC=2.7.4.3; ATP-AMP transphosphorylase 4; ATP:AMP phosphotransferase; Adenylate kinase B; AK B; Adenylate monophosphate kinase 4 (At5g63400)                                                                                                                                | -1.001 |
| novel.1497 | K00966 mannose-1-phosphate guanylyltransferase [EC:2.7.7.13]   (RefSeq) probable mannose-1-phosphate guanylyltransferase 3 (A)                                 | Probable mannose-1-phosphate guanylyltransferase 2; EC=2.7.7.13 (At3g55590)                                                                                                                                                                                                                     | 3.429  |
| Cs2g18800  | K00975 glucose-1-phosphate adenyltransferase [EC:2.7.7.27]   (RefSeq) SB1, glgC; glucose-1-phosphate adenyltransferase small subunit 2, chloroplastic-like (A) | Glucose-1-phosphate adenyltransferase small subunit 2, chloroplastic; EC=2.7.7.27; ADP-glucose pyrophosphorylase; ADP-glucose synthase; AGPase B; Alpha-D-glucose-1-phosphate adenyl transferase; Flags: Precursor (At5g48300)                                                                  | 1.281  |
| Cs8g07230  | K00975 glucose-1-phosphate adenyltransferase [EC:2.7.7.27]   (RefSeq) glgC; glucose-1-phosphate adenyltransferase large subunit 1-like (A)                     | Glucose-1-phosphate adenyltransferase large subunit 1; EC=2.7.7.27; ADP-glucose pyrophosphorylase; ADP-glucose synthase; AGPase S; Alpha-D-glucose-1-phosphate adenyl transferase; Flags: Fragment (At4g39210)                                                                                  | 1.598  |
| Cs9g05370  | K01006 pyruvate, orthophosphate dikinase [EC:2.7.9.1]   (RefSeq) pyruvate, phosphate dikinase, chloroplastic (A)                                               | Pyruvate, phosphate dikinase, chloroplastic; EC=2.7.9.1 {ECO:0000250 UniProtKB:P11155}; Pyruvate, orthophosphate dikinase; Flags: Precursor (At4g15530)                                                                                                                                         | 2.484  |

|           |                                                                                                                 |                                                                                                                                                                                                                                                         |        |
|-----------|-----------------------------------------------------------------------------------------------------------------|---------------------------------------------------------------------------------------------------------------------------------------------------------------------------------------------------------------------------------------------------------|--------|
| Cs2g29630 | K01114 phospholipase C [EC:3.1.4.3]   (RefSeq) non-specific phospholipase C2 (A)                                | Non-specific phospholipase C2; EC=3.1.-.-; Flags: Precursor (At2g26870)                                                                                                                                                                                 | 1.499  |
| Cs7g15620 | K01114 phospholipase C [EC:3.1.4.3]   (RefSeq) non-specific phospholipase C4-like (A)                           | Non-specific phospholipase C4; EC=3.1.4.3 (At3g03530)                                                                                                                                                                                                   | 1.735  |
| Cs3g14760 | K01115 phospholipase D1/2 [EC:3.1.4.4]   (RefSeq) phospholipase D zeta 1 (A)                                    | Phospholipase D zeta 1 {ECO:0000303 PubMed:11891260}; PLDzeta1 {ECO:0000303 PubMed:11891260}; EC=3.1.4.4 {ECO:0000269 PubMed:11891260}; Phospholipase D p1; AtPLDp1; Phospholipase D1 PHOX and PX-containing domain protein (At3g05630)                 | 3.732  |
| Cs3g26720 | K01115 phospholipase D1/2 [EC:3.1.4.4]   (RefSeq) phospholipase D delta (A)                                     | Phospholipase D delta {ECO:0000303 PubMed:11891260}; AtPLDdelta {ECO:0000303 PubMed:11891260}; PLD delta {ECO:0000303 PubMed:11891260}; EC=3.1.4.4 {ECO:0000269 PubMed:11706190, ECO:0000269 PubMed:12397060} (At4g35790)                               | 1.179  |
| Cs7g05370 | K01115 phospholipase D1/2 [EC:3.1.4.4]   (RefSeq) phospholipase D alpha 1-like (A)                              | Phospholipase D alpha 1; PLD alpha 1; EC=3.1.4.4; Choline phosphatase 1; Phosphatidylcholine-hydrolyzing phospholipase D 1 (At1g52570)                                                                                                                  | -1.690 |
| Cs3g26820 | K01176 alpha-amylase [EC:3.2.1.1]   (RefSeq) probable alpha-amylase 2 (A)                                       | Probable alpha-amylase 2; AtAMY2; EC=3.2.1.1 {ECO:0000250 UniProtKB:P00693}; 1,4-alpha-D-glucan glucanohydrolase (At1g76130)                                                                                                                            | 1.291  |
| Cs2g22040 | K01177 beta-amylase [EC:3.2.1.2]   (RefSeq) beta-amylase (A)                                                    | Beta-amylase; EC=3.2.1.2; 1,4-alpha-D-glucan maltohydrolase (At4g15210)                                                                                                                                                                                 | -1.868 |
| Cs9g04980 | K01177 beta-amylase [EC:3.2.1.2]   (RefSeq) beta-amylase 1, chloroplastic (A)                                   | Inactive beta-amylase 9; 1,4-alpha-D-glucan maltohydrolase; Inactive beta-amylase 3 (At5g18670)                                                                                                                                                         | -1.405 |
| Cs2g10900 | K01187 alpha-glucosidase [EC:3.2.1.20]   (RefSeq) alpha-glucosidase-like (A)                                    | Alpha-glucosidase; EC=3.2.1.20; Maltase; Flags: Precursor (At5g11720)                                                                                                                                                                                   | 2.803  |
| Cs5g07030 | K01188 beta-glucosidase [EC:3.2.1.21]   (RefSeq) beta-glucosidase 24-like (A)                                   | Beta-glucosidase 24; Os6bglu24; EC=3.2.1.21; Flags: Precursor (At5g44640)                                                                                                                                                                               | 7.377  |
| Cs5g07040 | K01188 beta-glucosidase [EC:3.2.1.21]   (RefSeq) vicianin hydrolase-like (A)                                    | Furostanol glycoside 26-O-beta-glucosidase {ECO:0000303 PubMed:8766714}; CsF26G {ECO:0000303 PubMed:8766714}; EC=3.2.1.186 {ECO:0000269 PubMed:8549824, ECO:0000269 PubMed:8766714}; Protodioscin 26-O-beta-D-glucosidase; Flags: Precursor (At5g54570) | 7.202  |
| Cs7g01360 | K01188 beta-glucosidase [EC:3.2.1.21]   (RefSeq) beta-glucosidase 12-like (A)                                   | Beta-glucosidase 12 {ECO:0000305}; EC=3.2.1.21 {ECO:0000305}; Flags: Precursor (At5g44640)                                                                                                                                                              | -1.151 |
| Cs8g03370 | K01188 beta-glucosidase [EC:3.2.1.21]   (RefSeq) beta-glucosidase 11-like (A)                                   | Beta-glucosidase 11; AtBGLU11; EC=3.2.1.21; Flags: Precursor (At1g02850)                                                                                                                                                                                | 2.141  |
| Cs4g18340 | K01193 beta-fructofuranosidase [EC:3.2.1.26]   (RefSeq) beta-fructofuranosidase, insoluble isoenzyme CWINV1 (A) | Beta-fructofuranosidase, insoluble isoenzyme CWINV1; EC=3.2.1.26; Cell wall beta-fructosidase 1; AtbetaFRUCT1; Cell wall invertase 1; AtcWINV1; Sucrose hydrolase 1; Flags: Precursor (At3g13790)                                                       | -3.210 |
| Cs5g01775 | K01194 alpha,alpha-trehalase [EC:3.2.1.28]   (RefSeq) probable trehalase (A)                                    | Trehalase; EC=3.2.1.28; Alpha,alpha-trehalase; Alpha,alpha-trehalose glucohydrolase; Trehalase 1; AtTRE1 (At4g24040)                                                                                                                                    | 2.169  |

|                 |                                                                                                                                                                  |                                                                                                                                                                                                                                                                              |        |
|-----------------|------------------------------------------------------------------------------------------------------------------------------------------------------------------|------------------------------------------------------------------------------------------------------------------------------------------------------------------------------------------------------------------------------------------------------------------------------|--------|
| Cs5g01790       | K01194 alpha,alpha-trehalase [EC:3.2.1.28]   (RefSeq) probable trehalase (A)                                                                                     | Trehalase; EC=3.2.1.28; Alpha,alpha-trehalase; Alpha,alpha-trehalose glucosylhydrolase; Trehalase 1; AtTRE1 (At4g24040)                                                                                                                                                      | 3.201  |
| Cs7g22230       | K01194 alpha,alpha-trehalase [EC:3.2.1.28]   (RefSeq) probable trehalase (A)                                                                                     | Trehalase; EC=3.2.1.28; Alpha,alpha-trehalase; Alpha,alpha-trehalose glucosylhydrolase; Trehalase 1; AtTRE1 (At4g24040)                                                                                                                                                      | 3.256  |
| novel.1980      | K01214 isoamylase [EC:3.2.1.68]   (RefSeq) isoamylase 1, chloroplastic (A)                                                                                       | Isoamylase 1, chloroplastic; AtISA1; EC=3.2.1.68; Flags: Precursor                                                                                                                                                                                                           | -1.739 |
| Cs3g03130       | K01513 ectonucleotide pyrophosphatase/phosphodiesterase family member 1/3 [EC:3.1.4.1 3.6.1.9]   (RefSeq) venom phosphodiesterase 2 (A)                          | (At4g29680)                                                                                                                                                                                                                                                                  | 2.146  |
| Cs2g22660       | K01593 aromatic-L-amino-acid/L-tryptophan decarboxylase [EC:4.1.1.28 4.1.1.105]   (RefSeq) aromatic-L-amino-acid decarboxylase-like (A)                          | Aromatic-L-amino-acid decarboxylase; AADC; EC=4.1.1.28; DOPA decarboxylase; Tryptophan decarboxylase (At2g20340)                                                                                                                                                             | 2.272  |
| Cs2g30610       | K01593 aromatic-L-amino-acid/L-tryptophan decarboxylase [EC:4.1.1.28 4.1.1.105]   (RefSeq) tyrosine/DOPA decarboxylase 1-like (A)                                | Tyrosine/DOPA decarboxylase 2; Includes: DOPA decarboxylase; DDC; EC=4.1.1.28; Includes: Tyrosine decarboxylase; EC=4.1.1.25 (At2g20340)                                                                                                                                     | -2.103 |
| Cs3g22910       | K01593 aromatic-L-amino-acid/L-tryptophan decarboxylase [EC:4.1.1.28 4.1.1.105]   (RefSeq) tyrosine/DOPA decarboxylase 1-like (A)                                | Tyrosine/DOPA decarboxylase 2; Includes: DOPA decarboxylase; DDC; EC=4.1.1.28; Includes: Tyrosine decarboxylase; EC=4.1.1.25 (At2g20340)                                                                                                                                     | -1.551 |
| Cs7g16560       | K01593 aromatic-L-amino-acid/L-tryptophan decarboxylase [EC:4.1.1.28 4.1.1.105]   (RefSeq) tyrosine/DOPA decarboxylase 1-like (A)                                | Tyrosine/DOPA decarboxylase 5; Includes: DOPA decarboxylase; DDC; EC=4.1.1.28; Includes: Tyrosine decarboxylase; EC=4.1.1.25 (At4g28680)                                                                                                                                     | -1.760 |
| Cs7g16600       | K01593 aromatic-L-amino-acid/L-tryptophan decarboxylase [EC:4.1.1.28 4.1.1.105]   (RefSeq) tyrosine/DOPA decarboxylase 1-like (A)                                | Tyrosine/DOPA decarboxylase 2; Includes: DOPA decarboxylase; DDC; EC=4.1.1.28; Includes: Tyrosine decarboxylase; EC=4.1.1.25 (At2g20340)                                                                                                                                     | -1.695 |
| novel.2308      | K01601 ribulose-bisphosphate carboxylase large chain [EC:4.1.1.39]   (RefSeq) rbcL, CisiCp029; ribulose-1,5-bisphosphate carboxylase/oxygenase large subunit (A) | Ribulose bisphosphate carboxylase large chain; RuBisCO large subunit; EC=4.1.1.39; Flags: Fragment (AtCh031)                                                                                                                                                                 | 1.911  |
| Cs1g20920       | K01610 phosphoenolpyruvate carboxykinase (ATP) [EC:4.1.1.49]   (RefSeq) phosphoenolpyruvate carboxykinase [ATP]-like (A)                                         | Phosphoenolpyruvate carboxykinase (ATP); PEP carboxykinase; PEPCK; EC=4.1.1.49 (At4g37870)                                                                                                                                                                                   | -1.471 |
| orange1.1t03552 | K01613 phosphatidylserine decarboxylase [EC:4.1.1.65]   (RefSeq) phosphatidylserine decarboxylase proenzyme 2-like (A)                                           | Phosphatidylserine decarboxylase proenzyme 2; EC=4.1.1.65 {ECO:0000255 HAMAP-Rule:MF_03209}; Contains: Phosphatidylserine decarboxylase 2 beta chain; Contains: Phosphatidylserine decarboxylase 2 alpha chain (At5g57190)                                                   | 1.078  |
| Cs5g06930       | K01638 malate synthase [EC:2.3.3.9]   (RefSeq) malate synthase, glyoxysomal (A)                                                                                  | Malate synthase, glyoxysomal; EC=2.3.3.9 (At5g03860)                                                                                                                                                                                                                         | -1.677 |
| Cs5g35310       | K01652 acetolactate synthase I/II/III large subunit [EC:2.2.1.6]   (RefSeq) acetolactate synthase 3, chloroplastic-like (A)                                      | Acetolactate synthase 3, chloroplastic; EC=2.2.1.6; ALS III; Acetohydroxy-acid synthase III; Acetolactate synthase III; Flags: Precursor (At3g48560)                                                                                                                         | -1.419 |
| Cs2g12755       | K01657 anthranilate synthase component I [EC:4.1.3.27]   (RefSeq) anthranilate synthase alpha subunit 2, chloroplastic (A)                                       | --                                                                                                                                                                                                                                                                           | 1.350  |
| Cs2g17930       | K01658 anthranilate synthase component II [EC:4.1.3.27]   (RefSeq) anthranilate synthase beta subunit 2, chloroplastic-like (A)                                  | Anthranilate synthase beta subunit 1, chloroplastic; EC=4.1.3.27; Anthranilate synthase component 2-1; Anthranilate synthase, glutamine amidotransferase component 2-1; Protein TRYPTOPHAN BIOSYNTHESIS 4; Protein WEAK ETHYLENE INSENSITIVE 7; Flags: Precursor (At1g25220) | -1.192 |

|                 |                                                                                                                                              |                                                                                                                                                                                                                                                                                                          |        |
|-----------------|----------------------------------------------------------------------------------------------------------------------------------------------|----------------------------------------------------------------------------------------------------------------------------------------------------------------------------------------------------------------------------------------------------------------------------------------------------------|--------|
| Cs7g08810       | K01661 naphthoate synthase [EC:4.1.3.36]   (RefSeq) 1,4-dihydroxy-2-naphthoyl-CoA synthase, peroxisomal (A)                                  | 1,4-dihydroxy-2-naphthoyl-CoA synthase, peroxisomal; DHNS; EC=4.1.3.36; Enoyl-CoA hydratase/isomerase D; ECHID; Naphthoate synthase (At1g60550)                                                                                                                                                          | 1.153  |
| Cs1g20530       | K01662 1-deoxy-D-xylulose-5-phosphate synthase [EC:2.2.1.7]   (RefSeq) probable 1-deoxy-D-xylulose-5-phosphate synthase 2, chloroplastic (A) | Probable 1-deoxy-D-xylulose-5-phosphate synthase 2, chloroplastic; 1-deoxyxylulose-5-phosphate synthase; DXP synthase; DXPS; EC=2.2.1.7; Flags: Precursor (At4g15560)                                                                                                                                    | -1.131 |
| Cs7g26180       | K01689 enolase [EC:4.2.1.11]   (RefSeq) enolase 1, chloroplastic (A)                                                                         | Enolase 1, chloroplastic; EC=4.2.1.11; 2-phospho-D-glycerate hydro-lyase 1; 2-phosphoglycerate dehydratase 1; Flags: Precursor (At1g74030)                                                                                                                                                               | 1.238  |
| Cs2g07700       | K01696 tryptophan synthase beta chain [EC:4.2.1.20]   (RefSeq) tryptophan synthase beta chain 1 (A)                                          | Tryptophan synthase beta chain 2, chloroplastic; EC=4.2.1.20; Flags: Precursor (At4g27070)                                                                                                                                                                                                               | -3.378 |
| Cs3g11500       | K01738 cysteine synthase A [EC:2.5.1.47]   (RefSeq) bifunctional L-3-cyanoalanine synthase/cysteine synthase D2-like (A)                     | Bifunctional L-3-cyanoalanine synthase/cysteine synthase D2; EC=2.5.1.47 {ECO:0000269 PubMed:10845460}; EC=4.4.1.9 {ECO:0000269 PubMed:10845460}; Beta-substituted Ala synthase 4;2; ARATH-Bsas4;2; Cysteine synthase D2; AtcysD2; O-acetylserine (thiol)-lyase 6 (At5g28020)                            | 1.614  |
| novel.1307      | K01738 cysteine synthase A [EC:2.5.1.47]   (RefSeq) cysteine synthase-like (A)                                                               | --                                                                                                                                                                                                                                                                                                       | 1.632  |
| Cs3g16400       | K01762 1-aminocyclopropane-1-carboxylate synthase [EC:4.4.1.14]   (RefSeq) 1-aminocyclopropane-1-carboxylate synthase 8 (A)                  | 1-aminocyclopropane-1-carboxylate synthase 8; ACC synthase 8; EC=4.4.1.14; S-adenosyl-L-methionine methylthioadenosine-lyase 8 (At4g37770)                                                                                                                                                               | -6.175 |
| Cs5g26580       | K01792 glucose-6-phosphate 1-epimerase [EC:5.1.3.15]   (RefSeq) putative glucose-6-phosphate 1-epimerase (A)                                 | Photosynthetic NDH subunit of subcomplex B 2, chloroplastic {ECO:0000303 PubMed:21785130}; Protein PnsB2 {ECO:0000303 PubMed:21785130}; NAD(P)H DEHYDROGENASE SUBUNIT 45 {ECO:0000303 PubMed:18974055}; NDH-DEPENDENT CYCLIC ELECTRON FLOW 2 {ECO:0000303 PubMed:18785996}; Flags: Precursor (At1g64770) | 2.507  |
| Cs7g32500       | K01803 triosephosphate isomerase (TIM) [EC:5.3.1.1]   (RefSeq) triosephosphate isomerase, cytosolic (A)                                      | Triosephosphate isomerase, cytosolic; TIM; Triose-phosphate isomerase; EC=5.3.1.1 (At3g55440)                                                                                                                                                                                                            | -1.019 |
| Cs2g12720       | K01809 mannose-6-phosphate isomerase [EC:5.3.1.8]   (RefSeq) mannose-6-phosphate isomerase 1-like (A)                                        | Mannose-6-phosphate isomerase 1; EC=5.3.1.8; Phosphohexomutase 1; Phosphomannose isomerase 1; PMI1; Protein MATERNAL EFFECT EMBRYO ARREST 31 (At3g02570)                                                                                                                                                 | -3.224 |
| Cs5g21790       | K01824 cholesterol Delta-isomerase [EC:5.3.3.5]   (RefSeq) probable 3-beta-hydroxysteroid-Delta(8),Delta(7)-isomerase (A)                    | Probable 3-beta-hydroxysteroid-Delta(8),Delta(7)-isomerase; EC=5.3.3.5; Cholesterol Delta-isomerase; Delta(8)-Delta(7) sterol isomerase; D8-D7 sterol isomerase (At1g20050)                                                                                                                              | -1.264 |
| orange1.1t04155 | K01824 cholesterol Delta-isomerase [EC:5.3.3.5]   (RefSeq) probable 3-beta-hydroxysteroid-Delta(8),Delta(7)-isomerase (A)                    | Probable 3-beta-hydroxysteroid-Delta(8),Delta(7)-isomerase; EC=5.3.3.5; Cholesterol Delta-isomerase; Delta(8)-Delta(7) sterol isomerase; D8-D7 sterol isomerase (At1g20050)                                                                                                                              | -1.353 |

|                 |                                                                                                                                                                                       |                                                                                                                                                                                                                               |        |
|-----------------|---------------------------------------------------------------------------------------------------------------------------------------------------------------------------------------|-------------------------------------------------------------------------------------------------------------------------------------------------------------------------------------------------------------------------------|--------|
| Cs4g04630       | K01853 cycloartenol synthase [EC:5.4.99.8]   (RefSeq) cycloartenol synthase 2-like (A)                                                                                                | Cycloartenol synthase; RcCAS; EC=5.4.99.8 (At2g07050)                                                                                                                                                                         | 12.888 |
| Cs1g01700       | K01858 myo-inositol-1-phosphate synthase [EC:5.5.1.4]   (RefSeq) inositol-3-phosphate synthase (A)                                                                                    | Inositol-3-phosphate synthase; MIP synthase; EC=5.5.1.4; Myo-inositol 1-phosphate synthase; IPS; MI-1-P synthase (At2g22240)                                                                                                  | -1.646 |
| Cs4g03330       | K01904 4-coumarate--CoA ligase [EC:6.2.1.12]   (RefSeq) 4-coumarate--CoA ligase 2-like (A)                                                                                            | 4-coumarate--CoA ligase 1; 4CL 1; EC=6.2.1.12; 4-coumaroyl-CoA synthase 1 (At3g21240)                                                                                                                                         | 1.106  |
| Cs5g06990       | K01904 4-coumarate--CoA ligase [EC:6.2.1.12]   (RefSeq) 4-coumarate--CoA ligase-like 9 isoform X1 (A)                                                                                 | 4-coumarate--CoA ligase-like 9; EC=6.2.1.-; 4-coumarate--CoA ligase isoform 4; At4CL4 (At5g63380)                                                                                                                             | 1.888  |
| orange1.1t01913 | K01904 4-coumarate--CoA ligase [EC:6.2.1.12]   (RefSeq) 4-coumarate--CoA ligase-like 9 isoform X1 (A)                                                                                 | 4-coumarate--CoA ligase-like 6; EC=6.2.1.- (At1g20510)                                                                                                                                                                        | 1.188  |
| Cs9g02530       | K01913 acetate---CoA ligase [EC:6.2.1.1]   (RefSeq) acetate/butyrate--CoA ligase AAE7, peroxisomal-like (A)                                                                           | Acetate/butyrate--CoA ligase AAE7, peroxisomal; EC=6.2.1.1; EC=6.2.1.2; AMP-binding protein 7; AtAMPBP7; Acetyl-CoA synthetase; Acyl-activating enzyme 7; Butyryl-CoA synthetase; Protein ACETATE NON-UTILIZING 1 (At3g16910) | -1.387 |
| Cs9g02540       | K01913 acetate---CoA ligase [EC:6.2.1.1]   (RefSeq) acetate/butyrate--CoA ligase AAE7, peroxisomal-like (A)                                                                           | Acetate/butyrate--CoA ligase AAE7, peroxisomal; EC=6.2.1.1; EC=6.2.1.2; AMP-binding protein 7; AtAMPBP7; Acetyl-CoA synthetase; Acyl-activating enzyme 7; Butyryl-CoA synthetase; Protein ACETATE NON-UTILIZING 1 (At3g16910) | -2.024 |
| Cs9g02550       | K01913 acetate---CoA ligase [EC:6.2.1.1]   (RefSeq) acetate/butyrate--CoA ligase AAE7, peroxisomal-like (A)                                                                           | Acetate/butyrate--CoA ligase AAE7, peroxisomal; EC=6.2.1.1; EC=6.2.1.2; AMP-binding protein 7; AtAMPBP7; Acetyl-CoA synthetase; Acyl-activating enzyme 7; Butyryl-CoA synthetase; Protein ACETATE NON-UTILIZING 1 (At3g16910) | 3.002  |
| Cs2g06290       | K01953 asparagine synthase (glutamine-hydrolysing) [EC:6.3.5.4]   (RefSeq) asparagine synthetase [glutamine-hydrolyzing] 1 (A)                                                        | Stem-specific protein TSJT1 (At4g27450)                                                                                                                                                                                       | -3.075 |
| Cs4g04540       | K01961 acetyl-CoA carboxylase, biotin carboxylase subunit [EC:6.4.1.2 6.3.4.14]   (RefSeq) biotin carboxylase 2, chloroplastic (A)                                                    | Biotin carboxylase 2, chloroplastic; EC=6.3.4.14; Acetyl-CoA carboxylase subunit A 2; ACC; EC=6.4.1.2; Flags: Precursor (At5g35360)                                                                                           | 2.293  |
| Cs6g07610       | K01962 acetyl-CoA carboxylase carboxyl transferase subunit alpha [EC:6.4.1.2 2.1.3.15]   (RefSeq) acetyl-coenzyme A carboxylase carboxyl transferase subunit alpha, chloroplastic (A) | Acetyl-coenzyme A carboxylase carboxyl transferase subunit alpha, chloroplastic; ACCase subunit alpha; Acetyl-CoA carboxylase carboxyltransferase subunit alpha; EC=6.4.1.2; Flags: Precursor (At2g38040)                     | 2.188  |
| Cs6g02920       | K02160 acetyl-CoA carboxylase biotin carboxyl carrier protein   (RefSeq) biotin carboxyl carrier protein of acetyl-CoA carboxylase, chloroplastic (A)                                 | Biotin carboxyl carrier protein of acetyl-CoA carboxylase, chloroplastic; BCCP; Flags: Precursor (At5g16390)                                                                                                                  | 1.749  |
| Cs6g22090       | K02160 acetyl-CoA carboxylase biotin carboxyl carrier protein   (RefSeq) biotin carboxyl carrier protein of acetyl-CoA carboxylase 2, chloroplastic (A)                               | Biotin carboxyl carrier protein of acetyl-CoA carboxylase 2, chloroplastic; AtBCCP2; BCCP-2; Flags: Precursor (At5g15530)                                                                                                     | 3.136  |
| orange1.1t02112 | K02291 15-cis-phytoene/all-trans-phytoene synthase [EC:2.5.1.32 2.5.1.99]   (RefSeq) phytoene synthase 2, chloroplastic (A)                                                           | Phytoene synthase, chloroplastic; EC=2.5.1.32; MEL5; Flags: Precursor (At5g17230)                                                                                                                                             | 5.520  |
| Cs8g02300       | K02293 15-cis-phytoene desaturase [EC:1.3.5.5]   (RefSeq) CitPDS, pds; phytoene desaturase (A)                                                                                        | 15-cis-phytoene desaturase, chloroplastic/chromoplastic; EC=1.3.5.5; Phytoene dehydrogenase; OgPDS; Flags: Precursor (At4g14210)                                                                                              | 1.096  |

|                 |                                                                                                                                               |                                                                                                                                                                                                                                                                                                                                                          |        |
|-----------------|-----------------------------------------------------------------------------------------------------------------------------------------------|----------------------------------------------------------------------------------------------------------------------------------------------------------------------------------------------------------------------------------------------------------------------------------------------------------------------------------------------------------|--------|
| orange1.1t02361 | K02293 15-cis-phytoene desaturase [EC:1.3.5.5]   (RefSeq) CitPDS, pds; phytoene desaturase (A)                                                | Phytoene dehydrogenase, chloroplastic/chromoplastic; EC=1.3.99.-; Phytoene desaturase; Flags: Precursor (At4g14210)                                                                                                                                                                                                                                      | 1.073  |
| Cs7g22860       | K02437 glycine cleavage system H protein   (RefSeq) glycine cleavage system H protein, mitochondrial (A)                                      | Glycine cleavage system H protein, mitochondrial; Flags: Precursor (At1g32470)                                                                                                                                                                                                                                                                           | -1.613 |
| Cs7g19710       | K03428 magnesium-protoporphyrin O-methyltransferase [EC:2.1.1.11]   (RefSeq) magnesium protoporphyrin IX methyltransferase, chloroplastic (A) | Magnesium protoporphyrin IX methyltransferase, chloroplastic; EC=2.1.1.11; Flags: Precursor (At4g25080)                                                                                                                                                                                                                                                  | -2.570 |
| Cs3g27290       | K03781 catalase [EC:1.11.1.6]   (RefSeq) catalase isozyme 1 (A)                                                                               | Catalase isozyme 1; EC=1.11.1.6 (At4g35090)                                                                                                                                                                                                                                                                                                              | 1.257  |
| Cs8g20050       | K03809 NAD(P)H dehydrogenase (quinone) [EC:1.6.5.2]   (RefSeq) probable NAD(P)H dehydrogenase (quinone) FQR1-like 3 (A)                       | Probable NAD(P)H dehydrogenase (quinone) FQR1-like 3 {ECO:0000305}; EC=1.6.5.2 {ECO:0000250 UniProtKB:Q9LSQ5} (At5g54500)                                                                                                                                                                                                                                | -1.098 |
| Cs5g31210       | K04121 ent-kaurene synthase [EC:4.2.3.19]   (RefSeq) ent-kaur-16-ene synthase, chloroplastic (A)                                              | Ent-copalyl diphosphate synthase, chloroplastic; Ent-CDP synthase; EC=5.5.1.13; Ent-copalyl diphosphate synthase; Ent-kaurene synthase A; KSA; Flags: Precursor (At4g02780)                                                                                                                                                                              | 1.797  |
| orange1.1t03278 | K04121 ent-kaurene synthase [EC:4.2.3.19]   (RefSeq) ent-kaur-16-ene synthase, chloroplastic (A)                                              | Ent-kaur-16-ene synthase, chloroplastic; EC=4.2.3.19; Ent-kaurene synthase; AtKS; Ent-kaurene synthase B; KSB; Protein GA REQUIRING 2; Flags: Precursor (At1g79460)                                                                                                                                                                                      | 2.905  |
| novel.1947      | K04121 ent-kaurene synthase [EC:4.2.3.19]   (RefSeq) ent-kaur-16-ene synthase, chloroplastic (A)                                              | Santalene and bergamotene synthase, chloroplastic; (+)-alpha-santalene synthase ((2Z,6Z)-farnesyl diphosphate cyclizing); EC=4.2.3.50; (+)-endo-beta-bergamotene synthase ((2Z,6Z)-farnesyl diphosphate cyclizing); EC=4.2.3.53; (-)-endo-alpha-bergamotene synthase ((2Z,6Z)-farnesyl diphosphate cyclizing); EC=4.2.3.54; Flags: Precursor (At1g79460) | 3.487  |
| orange1.1t01909 | K04122 ent-kaurene oxidase [EC:1.14.13.78]   (RefSeq) ent-kaurene oxidase, chloroplastic-like (A)                                             | Ent-kaurene oxidase, chloroplastic; AtKO1; EC=1.14.13.78 {ECO:0000269 PubMed:20698828, ECO:0000269 PubMed:9952446}; Cytochrome P450 701A3 (At5g25900)                                                                                                                                                                                                    | 1.661  |
| orange1.1t01910 | K04122 ent-kaurene oxidase [EC:1.14.13.78]   (RefSeq) ent-kaurene oxidase, chloroplastic-like (A)                                             | Ent-kaurene oxidase, chloroplastic; AtKO1; EC=1.14.13.78 {ECO:0000269 PubMed:20698828, ECO:0000269 PubMed:9952446}; Cytochrome P450 701A3 (At5g25900)                                                                                                                                                                                                    | 2.918  |
| Cs1g24480       | K04123 ent-kaurenoic acid hydroxylase [EC:1.14.13.79]   (RefSeq) ent-kaurenoic acid oxidase 2-like (A)                                        | Abscisic acid 8'-hydroxylase 3; ABA 8'-hydroxylase 3; EC=1.14.13.93; Cytochrome P450 707A7; OsABA8ox3 (At1g19630)                                                                                                                                                                                                                                        | 4.003  |
| Cs1g15700       | K04124 gibberellin 3-beta-dioxygenase [EC:1.14.11.15]   (RefSeq) gibberellin 3-beta-dioxygenase 1-like (A)                                    | 1-aminocyclopropane-1-carboxylate oxidase; ACC oxidase; EC=1.14.17.4; Ethylene-forming enzyme; EFE (At1g79760)                                                                                                                                                                                                                                           | -2.511 |
| Cs4g20350       | K04124 gibberellin 3-beta-dioxygenase [EC:1.14.11.15]   (RefSeq) gibberellin 3-beta-dioxygenase 1 (A)                                         | Gibberellin 3-beta-dioxygenase 1; EC=1.14.11.15; GA 3-oxidase 1; Gibberellin 3 beta-hydroxylase 1 (At1g15550)                                                                                                                                                                                                                                            | 3.048  |
| Cs7g14940       | K04125 gibberellin 2-oxidase [EC:1.14.11.13]   (RefSeq) gibberellin 2-beta-dioxygenase 8-like (A)                                             | Gibberellin 2-beta-dioxygenase 8; EC=1.14.11.13; GA 2-oxidase 8; Gibberellin 2-beta-hydroxylase 8; Gibberellin 2-oxidase 8 (At4g21200)                                                                                                                                                                                                                   | 2.657  |
| Cs8g20380       | K04125 gibberellin 2-oxidase [EC:1.14.11.13]   (RefSeq) gibberellin 2-beta-dioxygenase 8-like (A)                                             | Gibberellin 2-beta-dioxygenase 8; EC=1.14.11.13; GA 2-oxidase 8; Gibberellin 2-beta-hydroxylase 8; Gibberellin 2-oxidase 8 (At5g58660)                                                                                                                                                                                                                   | -1.272 |

|                 |                                                                                                        |                                                                                                                                                                                                                                                                                                                                                                                                                                                                           |        |
|-----------------|--------------------------------------------------------------------------------------------------------|---------------------------------------------------------------------------------------------------------------------------------------------------------------------------------------------------------------------------------------------------------------------------------------------------------------------------------------------------------------------------------------------------------------------------------------------------------------------------|--------|
| Cs1g03960       | K05278 flavonol synthase [EC:1.14.11.23]   (RefSeq) flavonol synthase/flavanone 3-hydroxylase-like (A) | Protein SRG1; AtSRG1; Protein SENESCENCE-RELATED GENE 1 (At1g49390)                                                                                                                                                                                                                                                                                                                                                                                                       | -1.598 |
| Cs1g19280       | K05278 flavonol synthase [EC:1.14.11.23]   (RefSeq) flavonol synthase/flavanone 3-hydroxylase (A)      | Flavonol synthase/flavanone 3-hydroxylase; EC=1.14.11.23 {ECO:0000250 UniProtKB:Q7XZQ6}; EC=1.14.11.9 {ECO:0000250 UniProtKB:Q7XZQ6}; CitFLS; FLS (At5g08640)                                                                                                                                                                                                                                                                                                             | -1.187 |
| Cs4g05610       | K05278 flavonol synthase [EC:1.14.11.23]   (RefSeq) flavonol synthase/flavanone 3-hydroxylase-like (A) | Protein SRG1; AtSRG1; Protein SENESCENCE-RELATED GENE 1 (At5g20400)                                                                                                                                                                                                                                                                                                                                                                                                       | 1.368  |
| Cs5g09450       | K05280 flavonoid 3'-monooxygenase [EC:1.14.13.21]   (RefSeq) flavonoid 3'-monooxygenase (A)            | Flavonoid 3'-monooxygenase CYP75B3 {ECO:0000305}; EC=1.14.13.21 {ECO:0000305 PubMed:18726614}; Cytochrome P450 75B3 {ECO:0000303 PubMed:26082402}; Flavonoid 3'-hydroxylase {ECO:0000303 PubMed:18726614}; OsF3'H {ECO:0000303 PubMed:18726614} (At4g12300)                                                                                                                                                                                                               | 2.987  |
| Cs9g14170       | K05280 flavonoid 3'-monooxygenase [EC:1.14.13.21]   (RefSeq) flavonoid 3'-monooxygenase (A)            | Flavonoid 3'-monooxygenase; EC=1.14.13.21; Cytochrome P450 75B1; Flavonoid 3'-hydroxylase; AtF3'H; Protein TRANSPARENT TESTA 7 (At4g12300)                                                                                                                                                                                                                                                                                                                                | -4.029 |
| Cs9g16520       | K05282 gibberellin 20-oxidase [EC:1.14.11.12]   (RefSeq) gibberellin 20 oxidase 1 (A)                  | Gibberellin 20 oxidase 1; EC=1.14.11.-; GA 20-oxidase 1; AtGA20ox1; Gibberellin C-20 oxidase 1 (At4g25420)                                                                                                                                                                                                                                                                                                                                                                | 2.161  |
| orange1.1t00272 | K05282 gibberellin 20-oxidase [EC:1.14.11.12]   (RefSeq) gibberellin 20 oxidase 1-D-like (A)           | Gibberellin 20 oxidase 2; EC=1.14.11.-; GA 20-oxidase 2; Gibberellin C-20 oxidase 2 (At5g51810)                                                                                                                                                                                                                                                                                                                                                                           | 7.813  |
| Cs7g23860       | K05349 beta-glucosidase [EC:3.2.1.21]   (RefSeq) beta-glucosidase BoGH3B-like (A)                      | Beta-xylosidase/alpha-L-arabinofuranosidase 2 {ECO:0000303 PubMed:17615411, ECO:0000312 EMBL:ABQ45228.1}; Xylan 1,4-beta-xylosidase/Alpha-L-arabinofuranosidase 2; MsXyl2 {ECO:0000303 PubMed:17615411}; Includes: Beta-xylosidase; EC=3.2.1.37; 1,4-beta-D-xylan xylohydrolase {ECO:0000250 UniProtKB:P48792}; Xylan 1,4-beta-xylosidase; Includes: Alpha-L-arabinofuranosidase; Arabinosidase {ECO:0000250 UniProtKB:P48792}; EC=3.2.1.55; Flags: Precursor (At5g20950) | -1.339 |
| Cs8g13800       | K05349 beta-glucosidase [EC:3.2.1.21]   (RefSeq) beta-glucosidase BoGH3B-like (A)                      | Beta-xylosidase/alpha-L-arabinofuranosidase 2 {ECO:0000303 PubMed:17615411, ECO:0000312 EMBL:ABQ45228.1}; Xylan 1,4-beta-xylosidase/Alpha-L-arabinofuranosidase 2; MsXyl2 {ECO:0000303 PubMed:17615411}; Includes: Beta-xylosidase; EC=3.2.1.37; 1,4-beta-D-xylan xylohydrolase {ECO:0000250 UniProtKB:P48792}; Xylan 1,4-beta-xylosidase; Includes: Alpha-L-arabinofuranosidase; Arabinosidase {ECO:0000250 UniProtKB:P48792}; EC=3.2.1.55; Flags: Precursor (At5g20950) | -2.435 |
| Cs8g19870       | K05349 beta-glucosidase [EC:3.2.1.21]   (RefSeq) beta-glucosidase BoGH3B-like (A)                      | Beta-D-xylosidase 1; AtBXL1; EC=3.2.1.-; Alpha-L-arabinofuranosidase; EC=3.2.1.55; Flags: Precursor (At3g47000)                                                                                                                                                                                                                                                                                                                                                           | 1.672  |

|                 |                                                                                                                                                             |                                                                                                                                                                                                                                                                               |        |
|-----------------|-------------------------------------------------------------------------------------------------------------------------------------------------------------|-------------------------------------------------------------------------------------------------------------------------------------------------------------------------------------------------------------------------------------------------------------------------------|--------|
| orange1.1t00039 | K05350 beta-glucosidase [EC:3.2.1.21]   (RefSeq) beta-glucosidase 44-like (A)                                                                               | Beta-glucosidase 44; AtBGLU44; EC=3.2.1.21; Flags: Precursor (At3g18080)                                                                                                                                                                                                      | -1.481 |
| Cs2g03010       | K05359 aroenate/prephenate dehydratase [EC:4.2.1.91 4.2.1.51]   (RefSeq) aroenate dehydratase/prephenate dehydratase 1, chloroplastic (A)                   | Aroenate dehydratase/prephenate dehydratase 1, chloroplastic; AtADT1; AtPDT1; EC=4.2.1.51; EC=4.2.1.91; Flags: Precursor (At1g11790)                                                                                                                                          | -1.591 |
| Cs7g15250       | K05928 tocopherol O-methyltransferase [EC:2.1.1.95]   (RefSeq) probable tocopherol O-methyltransferase, chloroplastic (A)                                   | Probable tocopherol O-methyltransferase, chloroplastic; EC=2.1.1.95; Gamma-tocopherol methyltransferase; Vitamin E pathway gene 4 protein; Flags: Precursor (At1g64970)                                                                                                       | -1.094 |
| Cs3g20140       | K05933 aminocyclopropanecarboxylate oxidase [EC:1.14.17.4]   (RefSeq) 1-aminocyclopropane-1-carboxylate oxidase 5 (A)                                       | 1-aminocyclopropane-1-carboxylate oxidase 5; ACC oxidase 5; AtACO5; EC=1.14.17.4 (At1g77330)                                                                                                                                                                                  | -1.313 |
| Cs4g12530       | K06892 feruloyl-CoA ortho-hydroxylase [EC:1.14.11.-]   (RefSeq) feruloyl CoA ortho-hydroxylase 1 (A)                                                        | Feruloyl CoA ortho-hydroxylase 1; EC=1.14.11.- (At3g12900)                                                                                                                                                                                                                    | 2.579  |
| Cs4g12540       | K06892 feruloyl-CoA ortho-hydroxylase [EC:1.14.11.-]   (RefSeq) feruloyl CoA ortho-hydroxylase 1 (A)                                                        | Feruloyl CoA ortho-hydroxylase 1; EC=1.14.11.- (At3g12900)                                                                                                                                                                                                                    | -2.707 |
| Cs4g06390       | K07748 sterol-4alpha-carboxylate 3-dehydrogenase (decarboxylating) [EC:1.1.1.170]   (RefSeq) 3beta-hydroxysteroid-dehydrogenase/decarboxylase isoform 2 (A) | 3beta-hydroxysteroid-dehydrogenase/decarboxylase isoform 2; At3BETAHSD/D2; EC=1.1.1.170; 4alpha-carboxysterol-C3-dehydrogenase/C4-decarboxylase isoform 1-2; Reticulon-like protein B19; AtRTNLB19; Sterol-4-alpha-carboxylate 3-dehydrogenase 2, decarboxylating (At1g47290) | 1.351  |
| Cs6g06610       | K08081 tropinone reductase I [EC:1.1.1.206]   (RefSeq) tropinone reductase homolog (A)                                                                      | Tropinone reductase homolog; EC=1.1.1.-; P29X (At2g29290)                                                                                                                                                                                                                     | 1.100  |
| Cs8g19105       | K08081 tropinone reductase I [EC:1.1.1.206]   (RefSeq) tropinone reductase homolog At2g29170-like (A)                                                       | Tropinone reductase homolog At2g29170 {ECO:0000305}; EC=1.1.1.- {ECO:0000305} (At2g29170)                                                                                                                                                                                     | -3.006 |
| orange1.1t02874 | K08081 tropinone reductase I [EC:1.1.1.206]   (RefSeq) tropinone reductase homolog At2g29170-like (A)                                                       | Senescence-associated protein 13 {ECO:0000303 PubMed:9617813}; Tropinone reductase homolog SAG13 {ECO:0000250 UniProtKB:P50162}; EC=1.1.1.- {ECO:0000305} (At2g29350)                                                                                                         | -1.365 |
| orange1.1t03034 | K08081 tropinone reductase I [EC:1.1.1.206]   (RefSeq) tropinone reductase homolog (A)                                                                      | Tropinone reductase homolog; EC=1.1.1.-; P29X (At5g06060)                                                                                                                                                                                                                     | 2.709  |
| orange1.1t03035 | K08081 tropinone reductase I [EC:1.1.1.206]   (RefSeq) tropinone reductase homolog (A)                                                                      | Tropinone reductase homolog; EC=1.1.1.-; P29X (At5g06060)                                                                                                                                                                                                                     | 2.759  |
| Cs5g16830       | K08099 chlorophyllase [EC:3.1.1.14]   (RefSeq) chlorophyllase-1, chloroplastic (A)                                                                          | Chlorophyllase-1, chloroplastic; EC=3.1.1.14; Chlorophyll-chlorophyllido hydrolase 1; Chlase 1; Flags: Precursor (At1g19670)                                                                                                                                                  | 6.634  |
| Cs4g17490       | K08241 jasmonate O-methyltransferase [EC:2.1.1.141]   (RefSeq) jasmonate O-methyltransferase-like (A)                                                       | Early nodulin-93; N-93 (At5g25940)                                                                                                                                                                                                                                            | -1.909 |
| orange1.1t04495 | K08248 (R)-mandelonitrile lyase [EC:4.1.2.10]   (RefSeq) (R)-mandelonitrile lyase-like (A)                                                                  | (R)-mandelonitrile lyase-like; EC=4.1.2.10; Hydroxynitrile lyase-like; (R)-oxynitrilase-like; Flags: Precursor (At1g73050)                                                                                                                                                    | -3.432 |
| Cs2g24600       | K09590 brassinosteroid-6-oxidase 1 [EC:1.14.-.-]   (RefSeq) cytochrome P450 85A1-like (A)                                                                   | Cytochrome P450 87A3; EC=1.14.-.- (At1g12740)                                                                                                                                                                                                                                 | 1.659  |

|                 |                                                                                                                                                                                |                                                                                                                                                                                                                      |        |
|-----------------|--------------------------------------------------------------------------------------------------------------------------------------------------------------------------------|----------------------------------------------------------------------------------------------------------------------------------------------------------------------------------------------------------------------|--------|
| Cs6g19630       | K09590 brassinosteroid-6-oxidase 1 [EC:1.14.-.-]   (RefSeq) cytochrome P450 85A (A)                                                                                            | Cytochrome P450 85A; EC=1.14.-.-; C6-oxidase (At5g38970)                                                                                                                                                             | -1.807 |
| Cs3g01140       | K09753 cinnamoyl-CoA reductase [EC:1.2.1.44]   (RefSeq) cinnamoyl-CoA reductase 1-like (A)                                                                                     | Cinnamoyl-CoA reductase 2; AtCCR2; EC=1.2.1.44 (At2g02400)                                                                                                                                                           | 1.154  |
| Cs3g01270       | K09753 cinnamoyl-CoA reductase [EC:1.2.1.44]   (RefSeq) cinnamoyl-CoA reductase 1-like (A)                                                                                     | Cinnamoyl-CoA reductase 1 {ECO:0000305}; OsCCR1 {ECO:0000303 PubMed:16380417}; EC=1.2.1.44 {ECO:0000269 PubMed:16380417} (At2g02400)                                                                                 | -1.007 |
| Cs3g13090       | K09753 cinnamoyl-CoA reductase [EC:1.2.1.44]   (RefSeq) cinnamoyl-CoA reductase 1-like (A)                                                                                     | Cinnamoyl-CoA reductase 1 {ECO:0000305}; OsCCR1 {ECO:0000303 PubMed:16380417}; EC=1.2.1.44 {ECO:0000269 PubMed:16380417} (At2g33590)                                                                                 | 1.330  |
| Cs7g02080       | K09753 cinnamoyl-CoA reductase [EC:1.2.1.44]   (RefSeq) cinnamoyl-CoA reductase 1-like (A)                                                                                     | Tetraketide alpha-pyrone reductase 1; EC=1.1.1.-; Protein DIHYDROFLAVONOL 4-REDUCTASE-LIKE 1 (At5g19440)                                                                                                             | 1.202  |
| orange1.1t02754 | K09753 cinnamoyl-CoA reductase [EC:1.2.1.44]   (RefSeq) cinnamoyl-CoA reductase 1-like (A)                                                                                     | Cinnamoyl-CoA reductase 1; AtCCR1; EC=1.2.1.44; Protein IRREGULAR XYLEM 4 (At1g15950)                                                                                                                                | -1.095 |
| Cs1g12000       | K09833 homogentisate phytyltransferase / homogentisate geranylgeranyltransferase [EC:2.5.1.115 2.5.1.116]   (RefSeq) homogentisate phytyltransferase 1, chloroplastic-like (A) | Coumarin 8-geranyltransferase 1b, chloroplastic; EC=2.5.1.138 {ECO:0000269 PubMed:25077796}; Prenyltransferase 1b {ECO:0000303 PubMed:25077796}; CIPT1ba {ECO:0000303 PubMed:25077796}; Flags: Precursor (At2g18950) | 12.872 |
| Cs3g04700       | K09833 homogentisate phytyltransferase / homogentisate geranylgeranyltransferase [EC:2.5.1.115 2.5.1.116]   (RefSeq) homogentisate phytyltransferase 1, chloroplastic-like (A) | Coumarin 8-geranyltransferase 1b, chloroplastic; EC=2.5.1.138 {ECO:0000269 PubMed:25077796}; Prenyltransferase 1b {ECO:0000303 PubMed:25077796}; CIPT1ba {ECO:0000303 PubMed:25077796}; Flags: Precursor (At2g18950) | 2.337  |
| Cs7g06010       | K09833 homogentisate phytyltransferase / homogentisate geranylgeranyltransferase [EC:2.5.1.115 2.5.1.116]   (RefSeq) homogentisate phytyltransferase 1, chloroplastic-like (A) | Coumarin 8-geranyltransferase 1b, chloroplastic; EC=2.5.1.138 {ECO:0000269 PubMed:25077796}; Prenyltransferase 1b {ECO:0000303 PubMed:25077796}; CIPT1ba {ECO:0000303 PubMed:25077796}; Flags: Precursor (At3g11950) | 1.332  |
| orange1.1t04551 | K09833 homogentisate phytyltransferase / homogentisate geranylgeranyltransferase [EC:2.5.1.115 2.5.1.116]   (RefSeq) homogentisate phytyltransferase 1, chloroplastic-like (A) | Coumarin 8-geranyltransferase 1b, chloroplastic; EC=2.5.1.138 {ECO:0000269 PubMed:25077796}; Prenyltransferase 1b {ECO:0000303 PubMed:25077796}; CIPT1ba {ECO:0000303 PubMed:25077796}; Flags: Precursor (At2g18950) | 4.347  |
| Cs6g13340       | K09835 polycopene isomerase [EC:5.2.1.13]   (RefSeq) CitCRTISO; polycopene isomerase, chloroplastic (A)                                                                        | Polycopene isomerase, chloroplastic; CrtISO; EC=5.2.1.13; Carotenoid isomerase; Protein tangerine; Flags: Precursor (At1g06820)                                                                                      | 1.499  |
| Cs1g22620       | K09838 zeaxanthin epoxidase [EC:1.14.15.21]   (RefSeq) CitZEP, ZEP; zeaxanthin epoxidase, chloroplastic (A)                                                                    | Zeaxanthin epoxidase, chloroplastic; EC=1.14.15.21; PA-ZE; Flags: Precursor (At5g67030)                                                                                                                              | -1.027 |
| Cs8g02440       | K09838 zeaxanthin epoxidase [EC:1.14.15.21]   (RefSeq) CitZEP, ZEP; zeaxanthin epoxidase, chloroplastic (A)                                                                    | Monooxygenase 3 {ECO:0000303 PubMed:10216258}; AtMO3 {ECO:0000303 PubMed:10216258}; EC=1.14.13.- (At5g05320)                                                                                                         | 1.192  |

|                 |                                                                                                                                   |                                                                                                                                                                                                                                                                                                     |        |
|-----------------|-----------------------------------------------------------------------------------------------------------------------------------|-----------------------------------------------------------------------------------------------------------------------------------------------------------------------------------------------------------------------------------------------------------------------------------------------------|--------|
| Cs8g02450       | K09838 zeaxanthin epoxidase [EC:1.14.15.21]   (RefSeq) zeaxanthin epoxidase, chloroplastic-like (A)                               | Monooxygenase 3 {ECO:0000303 PubMed:10216258}; AtMO3 {ECO:0000303 PubMed:10216258}; EC=1.14.13.- (At5g05320)                                                                                                                                                                                        | -2.134 |
| orange1.1t04051 | K09838 zeaxanthin epoxidase [EC:1.14.15.21]   (RefSeq) zeaxanthin epoxidase, chloroplastic-like (A)                               | Zeaxanthin epoxidase, chloroplastic; EC=1.14.15.21; PA-ZE; Flags: Precursor (At5g67030)                                                                                                                                                                                                             | 6.739  |
| orange1.1t04849 | K09838 zeaxanthin epoxidase [EC:1.14.15.21]   (RefSeq) CitZEP, ZEP; zeaxanthin epoxidase, chloroplastic (A)                       | Zeaxanthin epoxidase, chloroplastic; AtZEP; EC=1.14.15.21; Protein ABA DEFICIENT 1; AtABA1; Protein IMPAIRED IN BABA-INDUCED STERILITY 3; Protein LOW EXPRESSION OF OSMOTIC STRESS-RESPONSIVE GENES 6; Protein NON-PHOTOCHEMICAL QUENCHING 2; Flags: Precursor (At5g11330)                          | 2.491  |
| orange1.1t05125 | K09838 zeaxanthin epoxidase [EC:1.14.15.21]   (RefSeq) CitZEP, ZEP; zeaxanthin epoxidase, chloroplastic (A)                       | Zeaxanthin epoxidase, chloroplastic; EC=1.14.15.21; Flags: Precursor (At5g11330)                                                                                                                                                                                                                    | 2.122  |
| Cs7g14820       | K09840 9-cis-epoxycarotenoid dioxygenase [EC:1.13.11.51]   (RefSeq) probable carotenoid cleavage dioxygenase 4, chloroplastic (A) | Probable carotenoid cleavage dioxygenase 4, chloroplastic; AtCCD4; EC=1.14.99.-; AtNCED4; Flags: Precursor (At4g19170)                                                                                                                                                                              | 2.602  |
| Cs5g32360       | K09841 xanthoxin dehydrogenase [EC:1.1.1.288]   (RefSeq) ABA2; short chain alcohol dehydrogenase (A)                              | Short-chain dehydrogenase reductase 2a; AtSDR2a; EC=1.1.1.- (At4g03140)                                                                                                                                                                                                                             | 1.194  |
| Cs7g04930       | K09841 xanthoxin dehydrogenase [EC:1.1.1.288]   (RefSeq) ABA2; short chain alcohol dehydrogenase (A)                              | (-)-isopiperitenol/(-)-carveol dehydrogenase, mitochondrial; EC=1.1.1.223; EC=1.1.1.243; Flags: Precursor (At2g47140)                                                                                                                                                                               | 2.361  |
| orange1.1t01744 | K09841 xanthoxin dehydrogenase [EC:1.1.1.288]   (RefSeq) ABA2; short chain alcohol dehydrogenase (A)                              | Short-chain dehydrogenase reductase 3b; AtSDR3b; EC=1.1.1.- (At2g47140)                                                                                                                                                                                                                             | 3.877  |
| Cs8g13760       | K09842 abscisic-aldehyde oxidase [EC:1.2.3.14]   (RefSeq) AAO3; abscisic-aldehyde oxidase (A)                                     | Indole-3-acetaldehyde oxidase; IAA oxidase; EC=1.2.3.7; Aldehyde oxidase 1; AO-1; AtAO-1; AtAO1 (At5g20960)                                                                                                                                                                                         | 2.775  |
| Cs8g13770       | K09842 abscisic-aldehyde oxidase [EC:1.2.3.14]   (RefSeq) indole-3-acetaldehyde oxidase-like (A)                                  | Indole-3-acetaldehyde oxidase; IAA oxidase; EC=1.2.3.7; Aldehyde oxidase 1; AO-1; AtAO-1; AtAO1 (At5g20960)                                                                                                                                                                                         | 1.065  |
| Cs3g10840       | K10046 GDP-D-mannose 3', 5'-epimerase [EC:5.1.3.18 5.1.3.-]   (RefSeq) GDP-mannose 3,5-epimerase 1 (A)                            | GDP-mannose 3,5-epimerase 1; GDP-Man 3,5-epimerase 1; EC=5.1.3.18; OsGME-1 (At5g28840)                                                                                                                                                                                                              | -1.000 |
| Cs3g06080       | K10525 allene oxide cyclase [EC:5.3.99.6]   (RefSeq) allene oxide cyclase 4, chloroplastic-like (A)                               | Allene oxide cyclase, chloroplastic {ECO:0000303 Ref.1, ECO:0000303 Ref.2}; OsAOC {ECO:0000303 Ref.1}; EC=5.3.99.6 {ECO:0000269 PubMed:23347338}; Protein COLEOPTILE PHOTOMORPHOGENESIS 2 {ECO:0000303 PubMed:23347338}; Protein HEBIBA {ECO:0000303 PubMed:14605232}; Flags: Precursor (At1g13280) | -3.385 |
| Cs6g18900       | K10525 allene oxide cyclase [EC:5.3.99.6]   (RefSeq) allene oxide cyclase 4, chloroplastic (A)                                    | Allene oxide cyclase, chloroplastic {ECO:0000303 Ref.1, ECO:0000303 Ref.2}; OsAOC {ECO:0000303 Ref.1}; EC=5.3.99.6 {ECO:0000269 PubMed:23347338}; Protein COLEOPTILE PHOTOMORPHOGENESIS 2 {ECO:0000303 PubMed:23347338}; Protein HEBIBA {ECO:0000303 PubMed:14605232}; Flags: Precursor (At1g13280) | -1.303 |
| Cs6g18910       | K10525 allene oxide cyclase [EC:5.3.99.6]   (RefSeq) allene oxide cyclase 4, chloroplastic-like (A)                               | Allene oxide cyclase, chloroplastic {ECO:0000303 Ref.1, ECO:0000303 Ref.2}; OsAOC {ECO:0000303 Ref.1}; EC=5.3.99.6                                                                                                                                                                                  | -1.772 |

|                 |                                                                                                                                                         |                                                                                                                                                                                                                                                                                                     |        |
|-----------------|---------------------------------------------------------------------------------------------------------------------------------------------------------|-----------------------------------------------------------------------------------------------------------------------------------------------------------------------------------------------------------------------------------------------------------------------------------------------------|--------|
|                 |                                                                                                                                                         | {ECO:0000269 PubMed:23347338}; Protein COLEOPTILE PHOTOMORPHOGENESIS 2 {ECO:0000303 PubMed:23347338}; Protein HEBIBA {ECO:0000303 PubMed:14605232}; Flags: Precursor (At1g13280)                                                                                                                    |        |
| novel.2517      | K10525 allene oxide cyclase [EC:5.3.99.6]   (RefSeq) allene oxide cyclase 4, chloroplastic-like (A)                                                     | Allene oxide cyclase, chloroplastic {ECO:0000303 Ref.1, ECO:0000303 Ref.2}; OsAOC {ECO:0000303 Ref.1}; EC=5.3.99.6 {ECO:0000269 PubMed:23347338}; Protein COLEOPTILE PHOTOMORPHOGENESIS 2 {ECO:0000303 PubMed:23347338}; Protein HEBIBA {ECO:0000303 PubMed:14605232}; Flags: Precursor (At1g13280) | -2.188 |
| Cs7g21790       | K10526 OPC-8:0 CoA ligase 1 [EC:6.2.1.-]   (RefSeq) 4-coumarate--CoA ligase-like 5 (A)                                                                  | 4-coumarate--CoA ligase-like 5; EC=6.2.1.-; 4-coumarate--CoA ligase isoform 9; At4CL9; Peroxisomal OPC-8:0-CoA ligase 1 (At1g20510)                                                                                                                                                                 | 6.376  |
| orange1.1t04380 | K10526 OPC-8:0 CoA ligase 1 [EC:6.2.1.-]   (RefSeq) 4-coumarate--CoA ligase-like 5 (A)                                                                  | 4-coumarate--CoA ligase-like 2; EC=6.2.1.- (Hs22051274)                                                                                                                                                                                                                                             | 12.847 |
| Cs9g17460       | K10717 cytokinin trans-hydroxylase   (RefSeq) cytokinin hydroxylase-like (A)                                                                            | Cytokinin hydroxylase; EC=1.14.13.-; Cytochrome P450 35A1 (At5g52400)                                                                                                                                                                                                                               | 2.111  |
| Cs3g18080       | K11820 N-hydroxythioamide S-beta-glucosyltransferase [EC:2.4.1.195]   (RefSeq) UDP-glycosyltransferase 74B1 (A)                                         | 7-deoxyloganetin glucosyltransferase; EC=2.4.1.324; Genipin glucosyltransferase; UDP-glucose glucosyltransferase 2; GjUGT2; UDP-glycosyltransferase 85A24 (At1g22360)                                                                                                                               | 4.530  |
| Cs8g18300       | K11820 N-hydroxythioamide S-beta-glucosyltransferase [EC:2.4.1.195]   (RefSeq) UDP-glycosyltransferase 74B1 (A)                                         | UDP-glycosyltransferase 76B1 {ECO:0000305}; EC=2.4.1.- {ECO:0000305} (At3g11340)                                                                                                                                                                                                                    | 1.090  |
| Cs8g18310       | K11820 N-hydroxythioamide S-beta-glucosyltransferase [EC:2.4.1.195]   (RefSeq) UDP-glycosyltransferase 74B1 (A)                                         | UDP-glycosyltransferase 76B1 {ECO:0000305}; EC=2.4.1.- {ECO:0000305} (At3g11340)                                                                                                                                                                                                                    | -2.704 |
| Cs7g29750       | K12153 phenylalanine N-monooxygenase [EC:1.14.14.40]   (RefSeq) phenylalanine N-monooxygenase (A)                                                       | Tyrosine N-monooxygenase; EC=1.14.14.36 {ECO:0000269 PubMed:7937883}; Cytochrome P450 79A1; Cytochrome P450Tyr (At5g05260)                                                                                                                                                                          | -1.784 |
| Cs7g30780       | K12447 UDP-sugar pyrophosphorylase [EC:2.7.7.64]   (RefSeq) UDP-sugar pyrophosphorylase (A)                                                             | UTP--glucose-1-phosphate uridylyltransferase 3, chloroplastic {ECO:0000305}; EC=2.7.7.9 {ECO:0000269 PubMed:19286968}; UDP-glucose pyrophosphorylase 3 {ECO:0000303 PubMed:19286968}; Flags: Precursor (At3g56040)                                                                                  | 2.313  |
| Cs5g10110       | K12451 3,5-epimerase/4-reductase [EC:5.1.3.- 1.1.1.-]   (RefSeq) bifunctional dTDP-4-dehydrorhamnose 3,5-epimerase/dTDP-4-dehydrorhamnose reductase (A) | Bifunctional dTDP-4-dehydrorhamnose 3,5-epimerase/dTDP-4-dehydrorhamnose reductase {ECO:0000305}; EC=1.1.1.133 {ECO:0000269 PubMed:15020741}; EC=5.1.3.13 {ECO:0000269 PubMed:15020741}; dTDP-L-rhamnose synthase (At1g63000)                                                                       | -1.090 |
| Cs1g24710       | K12637 3-epi-6-deoxocathasterone 23-monooxygenase [EC:1.14.13.112]   (RefSeq) 3-epi-6-deoxocathasterone 23-monooxygenase (A)                            | 3-epi-6-deoxocathasterone 23-monooxygenase; EC=1.14.13.112; Cytochrome P450 90C1; Protein ROTUNDIFOLIA 3 (At4g36380)                                                                                                                                                                                | 5.918  |
| Cs1g18360       | K12638 3-epi-6-deoxocathasterone 23-monooxygenase [EC:1.14.13.112]   (RefSeq) 3-epi-6-deoxocathasterone 23-monooxygenase (A)                            | 3-epi-6-deoxocathasterone 23-monooxygenase; EC=1.14.13.112; Cytochrome P450 90D1 (At3g13730)                                                                                                                                                                                                        | 1.083  |

|                 |                                                                                                                                                                    |                                                                                                                                                                                                                                                                                       |        |
|-----------------|--------------------------------------------------------------------------------------------------------------------------------------------------------------------|---------------------------------------------------------------------------------------------------------------------------------------------------------------------------------------------------------------------------------------------------------------------------------------|--------|
| Cs2g18810       | K12639 cytochrome P450 family 724 subfamily B polypeptide 1 [EC:1.14.13.-]   (RefSeq) cytochrome P450 724B1-like (A)                                               | Cytochrome P450 724B1; EC=1.14.-.-; Dwarf protein 11; OsDWARF11 (At5g14400)                                                                                                                                                                                                           | -2.224 |
| orange1.1t00577 | K12643 anthranilate N-methyltransferase [EC:2.1.1.111]   (RefSeq) anthranilate N-methyltransferase-like (A)                                                        | Anthranilate N-methyltransferase; RgANMT; EC=2.1.1.111 (At5g54160)                                                                                                                                                                                                                    | 1.433  |
| orange1.1t00578 | K12643 anthranilate N-methyltransferase [EC:2.1.1.111]   (RefSeq) anthranilate N-methyltransferase-like (A)                                                        | Anthranilate N-methyltransferase; RgANMT; EC=2.1.1.111 (At5g54160)                                                                                                                                                                                                                    | 3.440  |
| Cs7g31990       | K12657 delta-1-pyrroline-5-carboxylate synthetase [EC:2.7.2.11 1.2.1.41]   (RefSeq) delta-1-pyrroline-5-carboxylate synthase (A)                                   | Delta-1-pyrroline-5-carboxylate synthase; P5CS; Includes: Glutamate 5-kinase; GK; EC=2.7.2.11; Gamma-glutamyl kinase; Includes: Gamma-glutamyl phosphate reductase; GPR; EC=1.2.1.41; Glutamate-5-semialdehyde dehydrogenase; Glutamyl-gamma-semialdehyde dehydrogenase (At3g55610_2) | -2.251 |
| orange1.1t03059 | K12657 delta-1-pyrroline-5-carboxylate synthetase [EC:2.7.2.11 1.2.1.41]   (RefSeq) delta-1-pyrroline-5-carboxylate synthase-like (A)                              | Delta-1-pyrroline-5-carboxylate synthase; P5CS; Includes: Glutamate 5-kinase; GK; EC=2.7.2.11; Gamma-glutamyl kinase; Includes: Gamma-glutamyl phosphate reductase; GPR; EC=1.2.1.41; Glutamate-5-semialdehyde dehydrogenase; Glutamyl-gamma-semialdehyde dehydrogenase (At2g39800_2) | -1.687 |
| orange1.1t00386 | K13034 L-3-cyanoalanine synthase/ cysteine synthase [EC:2.5.1.47 4.4.1.9]   (RefSeq) bifunctional L-3-cyanoalanine synthase/cysteine synthase 1, mitochondrial (A) | L-3-cyanoalanine synthase 2, mitochondrial; MdCAS2; EC=4.4.1.9; Flags: Precursor (At3g61440)                                                                                                                                                                                          | 4.935  |
| Cs1g05910       | K13065 shikimate O-hydroxycinnamoyltransferase [EC:2.3.1.133]   (RefSeq) vinorine synthase-like (A)                                                                | Salutaridinol 7-O-acetyltransferase {ECO:0000303 PubMed:11404355}; salAT {ECO:0000303 PubMed:11404355}; EC=2.3.1.150 {ECO:0000269 PubMed:11404355, ECO:0000269 PubMed:8537369} (At3g26040)                                                                                            | -1.949 |
| Cs1g05920       | K13065 shikimate O-hydroxycinnamoyltransferase [EC:2.3.1.133]   (RefSeq) vinorine synthase-like (A)                                                                | BAHD acyltransferase BIA1 {ECO:0000303 PubMed:22956280}; EC=2.3.1.-; Protein ABNORMAL SHOOT 1 {ECO:0000303 PubMed:22956280}; Protein BRASSINOSTEROID INACTIVATOR 1 {ECO:0000303 PubMed:22544867} (At3g26040)                                                                          | -2.952 |
| Cs1g05930       | K13065 shikimate O-hydroxycinnamoyltransferase [EC:2.3.1.133]   (RefSeq) vinorine synthase-like (A)                                                                | Salutaridinol 7-O-acetyltransferase {ECO:0000303 PubMed:11404355}; salAT {ECO:0000303 PubMed:11404355}; EC=2.3.1.150 {ECO:0000269 PubMed:11404355, ECO:0000269 PubMed:8537369} (At3g26040)                                                                                            | -1.430 |
| Cs2g17520       | K13065 shikimate O-hydroxycinnamoyltransferase [EC:2.3.1.133]   (RefSeq) vinorine synthase-like (A)                                                                | Salutaridinol 7-O-acetyltransferase {ECO:0000303 PubMed:11404355}; salAT {ECO:0000303 PubMed:11404355}; EC=2.3.1.150 {ECO:0000269 PubMed:11404355, ECO:0000269 PubMed:8537369} (At3g26040)                                                                                            | 13.256 |
| Cs3g04840       | K13065 shikimate O-hydroxycinnamoyltransferase [EC:2.3.1.133]   (RefSeq) vinorine synthase-like (A)                                                                | BAHD acyltransferase At5g47980; EC=2.3.1.- (At3g26040)                                                                                                                                                                                                                                | -1.485 |

|                 |                                                                                                                              |                                                                                                                                                                                                     |        |
|-----------------|------------------------------------------------------------------------------------------------------------------------------|-----------------------------------------------------------------------------------------------------------------------------------------------------------------------------------------------------|--------|
| Cs3g10450       | K13065 shikimate O-hydroxycinnamoyltransferase [EC:2.3.1.133]   (RefSeq)<br>shikimate O-hydroxycinnamoyltransferase-like (A) | Shikimate O-hydroxycinnamoyltransferase; EC=2.3.1.133;<br>Hydroxycinnamoyl transferase; Hydroxycinnamoyl-Coenzyme A<br>shikimate/quinic hydroxycinnamoyltransferase (At5g48930)                     | -2.145 |
| Cs3g10460       | K13065 shikimate O-hydroxycinnamoyltransferase [EC:2.3.1.133]   (RefSeq)<br>shikimate O-hydroxycinnamoyltransferase-like (A) | Shikimate O-hydroxycinnamoyltransferase; EC=2.3.1.133;<br>Hydroxycinnamoyl transferase; Hydroxycinnamoyl-Coenzyme A<br>shikimate/quinic hydroxycinnamoyltransferase (At5g48930)                     | -1.719 |
| Cs3g27120       | K13065 shikimate O-hydroxycinnamoyltransferase [EC:2.3.1.133]   (RefSeq)<br>vinorine synthase-like (A)                       | Vinorine synthase; EC=2.3.1.160 (At3g26040)                                                                                                                                                         | 7.472  |
| Cs4g01910       | K13065 shikimate O-hydroxycinnamoyltransferase [EC:2.3.1.133]   (RefSeq)<br>shikimate O-hydroxycinnamoyltransferase-like (A) | Shikimate O-hydroxycinnamoyltransferase; EC=2.3.1.133;<br>Hydroxycinnamoyl transferase; Hydroxycinnamoyl-Coenzyme A<br>shikimate/quinic hydroxycinnamoyltransferase (At5g48930)                     | -1.124 |
| Cs4g02380       | K13065 shikimate O-hydroxycinnamoyltransferase [EC:2.3.1.133]   (RefSeq)<br>shikimate O-hydroxycinnamoyltransferase-like (A) | Shikimate O-hydroxycinnamoyltransferase; EC=2.3.1.133;<br>Hydroxycinnamoyl transferase; Hydroxycinnamoyl-Coenzyme A<br>shikimate/quinic hydroxycinnamoyltransferase (At5g48930)                     | -2.534 |
| Cs5g18930       | K13065 shikimate O-hydroxycinnamoyltransferase [EC:2.3.1.133]   (RefSeq)<br>shikimate O-hydroxycinnamoyltransferase-like (A) | Shikimate O-hydroxycinnamoyltransferase; EC=2.3.1.133;<br>Hydroxycinnamoyl transferase; Hydroxycinnamoyl-Coenzyme A<br>shikimate/quinic hydroxycinnamoyltransferase (At5g48930)                     | -2.721 |
| Cs6g17150       | K13065 shikimate O-hydroxycinnamoyltransferase [EC:2.3.1.133]   (RefSeq)<br>vinorine synthase-like (A)                       | Salutaridinol 7-O-acetyltransferase {ECO:0000303 PubMed:11404355};<br>salAT {ECO:0000303 PubMed:11404355}; EC=2.3.1.150<br>{ECO:0000269 PubMed:11404355, ECO:0000269 PubMed:8537369}<br>(At3g26040) | 1.407  |
| Cs6g17160       | K13065 shikimate O-hydroxycinnamoyltransferase [EC:2.3.1.133]   (RefSeq)<br>vinorine synthase-like (A)                       | Vinorine synthase; EC=2.3.1.160 (At1g24430)                                                                                                                                                         | 8.040  |
| Cs7g10110       | K13065 shikimate O-hydroxycinnamoyltransferase [EC:2.3.1.133]   (RefSeq)<br>vinorine synthase-like (A)                       | BAHD acyltransferase At5g47980; EC=2.3.1.- (At3g26040)                                                                                                                                              | -1.531 |
| Cs9g08970       | K13065 shikimate O-hydroxycinnamoyltransferase [EC:2.3.1.133]   (RefSeq)<br>salutaridinol 7-O-acetyltransferase-like (A)     | Salutaridinol 7-O-acetyltransferase {ECO:0000303 PubMed:11404355};<br>salAT {ECO:0000303 PubMed:11404355}; EC=2.3.1.150<br>{ECO:0000269 PubMed:11404355, ECO:0000269 PubMed:8537369}<br>(At3g26040) | 3.593  |
| Cs9g19030       | K13065 shikimate O-hydroxycinnamoyltransferase [EC:2.3.1.133]   (RefSeq)<br>vinorine synthase-like (A)                       | BAHD acyltransferase At5g47980; EC=2.3.1.- (At3g26040)                                                                                                                                              | 2.298  |
| orange1.1t02793 | K13065 shikimate O-hydroxycinnamoyltransferase [EC:2.3.1.133]   (RefSeq)<br>shikimate O-hydroxycinnamoyltransferase (A)      | Shikimate O-hydroxycinnamoyltransferase; EC=2.3.1.133;<br>Hydroxycinnamoyl transferase; Hydroxycinnamoyl-Coenzyme A<br>shikimate/quinic hydroxycinnamoyltransferase (At5g48930)                     | -1.013 |
| Cs5g16860       | K13066 caffeic acid 3-O-methyltransferase [EC:2.1.1.68]   (RefSeq)<br>anthranilate N-methyltransferase-like (A)              | Anthranilate N-methyltransferase; RgANMT; EC=2.1.1.111 (At5g54160)                                                                                                                                  | 2.980  |

|                 |                                                                                                                             |                                                                                                                                                                                                                                                      |        |
|-----------------|-----------------------------------------------------------------------------------------------------------------------------|------------------------------------------------------------------------------------------------------------------------------------------------------------------------------------------------------------------------------------------------------|--------|
| Cs5g18010       | K13066 caffeic acid 3-O-methyltransferase [EC:2.1.1.68]   (RefSeq) caffeic acid 3-O-methyltransferase-like (A)              | Caffeic acid 3-O-methyltransferase 1; CAOMT-1; COMT-1; EC=2.1.1.68; S-adenosyl-L-methionine:caffeic acid 3-O-methyltransferase 1 (At5g54160)                                                                                                         | 3.211  |
| Cs5g24930       | K13066 caffeic acid 3-O-methyltransferase [EC:2.1.1.68]   (RefSeq) caffeic acid 3-O-methyltransferase 1-like isoform X1 (A) | Caffeic acid 3-O-methyltransferase 1; CAOMT-1; COMT-1; EC=2.1.1.68; S-adenosyl-L-methionine:caffeic acid 3-O-methyltransferase 1 (At5g54160)                                                                                                         | 1.277  |
| Cs5g24940       | K13066 caffeic acid 3-O-methyltransferase [EC:2.1.1.68]   (RefSeq) anthranilate N-methyltransferase-like isoform X1 (A)     | Anthranilate N-methyltransferase; RgANMT; EC=2.1.1.111 (At5g54160)                                                                                                                                                                                   | 1.034  |
| Cs5g24960       | K13066 caffeic acid 3-O-methyltransferase [EC:2.1.1.68]   (RefSeq) anthranilate N-methyltransferase-like (A)                | Anthranilate N-methyltransferase; RgANMT; EC=2.1.1.111 (At5g54160)                                                                                                                                                                                   | 1.013  |
| orange1.1t02947 | K13066 caffeic acid 3-O-methyltransferase [EC:2.1.1.68]   (RefSeq) anthranilate N-methyltransferase-like (A)                | Anthranilate N-methyltransferase; RgANMT; EC=2.1.1.111 (At5g54160)                                                                                                                                                                                   | -1.956 |
| orange1.1t03686 | K13066 caffeic acid 3-O-methyltransferase [EC:2.1.1.68]   (RefSeq) anthranilate N-methyltransferase-like (A)                | Anthranilate N-methyltransferase; RgANMT; EC=2.1.1.111 (At5g54160)                                                                                                                                                                                   | -1.156 |
| orange1.1t04506 | K13066 caffeic acid 3-O-methyltransferase [EC:2.1.1.68]   (RefSeq) anthranilate N-methyltransferase-like (A)                | Anthranilate N-methyltransferase; RgANMT; EC=2.1.1.111 (At5g54160)                                                                                                                                                                                   | -2.516 |
| orange1.1t05037 | K13066 caffeic acid 3-O-methyltransferase [EC:2.1.1.68]   (RefSeq) caffeic acid 3-O-methyltransferase 1-like (A)            | Flavone 3'-O-methyltransferase 1; AtOMT1; EC=2.1.1.42; Acetylserotonin O-methyltransferase OMT1 {ECO:0000305}; EC=2.1.1.4 {ECO:0000269 PubMed:25039887}; Caffeate O-methyltransferase 1; EC=2.1.1.68; Quercetin 3'-O-methyltransferase 1 (At3g53140) | -1.125 |
| novel.2237      | K13066 caffeic acid 3-O-methyltransferase [EC:2.1.1.68]   (RefSeq) anthranilate N-methyltransferase-like (A)                | Anthranilate N-methyltransferase; RgANMT; EC=2.1.1.111 (At5g54160)                                                                                                                                                                                   | -2.887 |
| novel.2253      | K13066 caffeic acid 3-O-methyltransferase [EC:2.1.1.68]   (RefSeq) anthranilate N-methyltransferase-like (A)                | Caffeic acid 3-O-methyltransferase; CAOMT; COMT; EC=2.1.1.68; S-adenosyl-L-methionine:caffeic acid 3-O-methyltransferase (At5g54160)                                                                                                                 | -3.424 |
| novel.2338      | K13066 caffeic acid 3-O-methyltransferase [EC:2.1.1.68]   (RefSeq) anthranilate N-methyltransferase-like (A)                | Caffeic acid 3-O-methyltransferase 1; CAOMT-1; COMT-1; EC=2.1.1.68; S-adenosyl-L-methionine:caffeic acid 3-O-methyltransferase 1 (At5g54160)                                                                                                         | -3.975 |
| novel.2404      | K13066 caffeic acid 3-O-methyltransferase [EC:2.1.1.68]   (RefSeq) anthranilate N-methyltransferase-like (A)                | Caffeic acid 3-O-methyltransferase; CAOMT; COMT; EC=2.1.1.68; S-adenosyl-L-methionine:caffeic acid 3-O-methyltransferase (At5g54160)                                                                                                                 | -2.282 |
| novel.1052      | K13066 caffeic acid 3-O-methyltransferase [EC:2.1.1.68]   (RefSeq) caffeic acid 3-O-methyltransferase-like (A)              | Caffeic acid 3-O-methyltransferase; CAOMT; COMT; EC=2.1.1.68; S-adenosyl-L-methionine:caffeic acid 3-O-methyltransferase (At5g54160)                                                                                                                 | -1.371 |
| novel.895       | K13066 caffeic acid 3-O-methyltransferase [EC:2.1.1.68]   (RefSeq) caffeic acid 3-O-methyltransferase-like (A)              | Caffeic acid 3-O-methyltransferase; CAOMT; COMT; EC=2.1.1.68; S-adenosyl-L-methionine:caffeic acid 3-O-methyltransferase (At5g54160)                                                                                                                 | 3.686  |
| novel.901       | K13066 caffeic acid 3-O-methyltransferase [EC:2.1.1.68]   (RefSeq) anthranilate N-methyltransferase-like (A)                | Caffeic acid 3-O-methyltransferase; CAOMT; COMT; EC=2.1.1.68; S-adenosyl-L-methionine:caffeic acid 3-O-methyltransferase; Flags: Fragment (At5g54160)                                                                                                | -4.629 |
| Cs9g03000       | K13071 pheophorbide a oxygenase [EC:1.14.15.17]   (RefSeq) pheophorbide a oxygenase, chloroplastic (A)                      | Protochlorophyllide-dependent translocon component 52, chloroplastic; ACD1-like protein; Protein TIC 55-IV; Translocon at the inner envelope membrane of chloroplasts 55-IV; Flags: Precursor (At4g25650)                                            | -2.281 |

|                 |                                                                                                                                                             |                                                                                                                                                                                                                                                                                                                   |        |
|-----------------|-------------------------------------------------------------------------------------------------------------------------------------------------------------|-------------------------------------------------------------------------------------------------------------------------------------------------------------------------------------------------------------------------------------------------------------------------------------------------------------------|--------|
| Cs8g09850       | K13082 bifunctional dihydroflavonol 4-reductase/flavanone 4-reductase [EC:1.1.1.219 1.1.1.234]   (RefSeq) dihydroflavonol-4-reductase (A)                   | Vestitone reductase; EC=1.1.1.348 (At2g45400)                                                                                                                                                                                                                                                                     | -2.052 |
| Cs1g22210       | K13260 isoflavone/4'-methoxyisoflavone 2'-hydroxylase [EC:1.14.13.89 1.14.13.53]   (RefSeq) cytochrome P450 81E8-like (A)                                   | Cytochrome P450 81E8 {ECO:0000303 PubMed:14617078}; EC=1.14.13.- {ECO:0000305} (At4g37370)                                                                                                                                                                                                                        | -2.369 |
| Cs3g15590       | K13260 isoflavone/4'-methoxyisoflavone 2'-hydroxylase [EC:1.14.13.89 1.14.13.53]   (RefSeq) cytochrome P450 81E8-like (A)                                   | Cytochrome P450 81D1; EC=1.14.-.- (At5g10610)                                                                                                                                                                                                                                                                     | -1.593 |
| Cs3g23010       | K13260 isoflavone/4'-methoxyisoflavone 2'-hydroxylase [EC:1.14.13.89 1.14.13.53]   (RefSeq) cytochrome P450 81E8-like (A)                                   | Cytochrome P450 81E8 {ECO:0000303 PubMed:14617078}; EC=1.14.13.- {ECO:0000305} (At4g37330)                                                                                                                                                                                                                        | 4.406  |
| orange1.1t01118 | K13496 UDP-glucosyl transferase 73C [EC:2.4.1.-]   (RefSeq) UDP-glycosyltransferase 73C3-like (A)                                                           | UDP-glycosyltransferase 73C3; EC=2.4.1.- (At2g36780)                                                                                                                                                                                                                                                              | 3.216  |
| orange1.1t01972 | K13496 UDP-glucosyl transferase 73C [EC:2.4.1.-]   (RefSeq) UDP-glycosyltransferase 73C6-like (A)                                                           | UDP-glycosyltransferase 73C2; EC=2.4.1.- (At2g36760)                                                                                                                                                                                                                                                              | -1.982 |
| orange1.1t01983 | K13496 UDP-glucosyl transferase 73C [EC:2.4.1.-]   (RefSeq) UDP-glycosyltransferase 73C3-like (A)                                                           | UDP-glycosyltransferase 73C3; EC=2.4.1.- (At2g36780)                                                                                                                                                                                                                                                              | -1.150 |
| orange1.1t01984 | K13496 UDP-glucosyl transferase 73C [EC:2.4.1.-]   (RefSeq) UDP-glycosyltransferase 73C6-like (A)                                                           | UDP-glycosyltransferase 73C3; EC=2.4.1.- (At2g36780)                                                                                                                                                                                                                                                              | 2.093  |
| orange1.1t03432 | K13496 UDP-glucosyl transferase 73C [EC:2.4.1.-]   (RefSeq) UDP-glycosyltransferase 73C3-like (A)                                                           | UDP-glycosyltransferase 87A2; EC=2.4.1.- (At2g30140)                                                                                                                                                                                                                                                              | -4.452 |
| novel.1919      | K13496 UDP-glucosyl transferase 73C [EC:2.4.1.-]   (RefSeq) UDP-glycosyltransferase 73C1-like (A)                                                           | UDP-glycosyltransferase 73C5; EC=2.4.1.-; Cytokinin-O-glucosyltransferase 3; Deoxynivalenol-glucosyl-transferase 1; Zeatin O-glucosyltransferase 3; AtZOG3 (At2g36800)                                                                                                                                            | 1.455  |
| Cs6g20410       | K13508 glycerol-3-phosphate acyltransferase [EC:2.3.1.15 2.3.1.198]   (RefSeq) glycerol-3-phosphate 2-O-acyltransferase 6 (A)                               | Glycerol-3-phosphate 2-O-acyltransferase 6; AtGPAT6; EC=2.3.1.198; Glycerol-3-phosphate acyltransferase 6 (At2g38110)                                                                                                                                                                                             | 12.480 |
| Cs7g04640       | K13508 glycerol-3-phosphate acyltransferase [EC:2.3.1.15 2.3.1.198]   (RefSeq) glycerol-3-phosphate 2-O-acyltransferase 6 (A)                               | Glycerol-3-phosphate 2-O-acyltransferase 6; AtGPAT6; EC=2.3.1.198; Glycerol-3-phosphate acyltransferase 6 (At2g38110)                                                                                                                                                                                             | 11.836 |
| Cs8g06970       | K13513 lysocardiolipin and lysophospholipid acyltransferase [EC:2.3.1.- 2.3.1.51]   (RefSeq) probable 1-acyl-sn-glycerol-3-phosphate acyltransferase 5 (A)  | Probable 1-acyl-sn-glycerol-3-phosphate acyltransferase 5; EC=2.3.1.51; Lysophosphatidyl acyltransferase 5 (At3g18850)                                                                                                                                                                                            | -3.028 |
| orange1.1t00566 | K13679 granule-bound starch synthase [EC:2.4.1.242]   (RefSeq) GBSSII-2, SB2; granule-bound starch synthase 1, chloroplastic/amyloplastic (A)               | Granule-bound starch synthase 1, chloroplastic/amyloplastic; EC=2.4.1.242; Granule-bound starch synthase I; GBSS-I; Flags: Precursor (At1g32900)                                                                                                                                                                  | 1.659  |
| Cs3g03640       | K13789 geranylgeranyl diphosphate synthase, type II [EC:2.5.1.1 2.5.1.10 2.5.1.29]   (RefSeq) geranylgeranyl pyrophosphate synthase, chloroplastic-like (A) | Geranylgeranyl pyrophosphate synthase, chloroplastic; GGPP synthase; GGPS; EC=2.5.1.-; (2E,6E)-farnesyl diphosphate synthase; Dimethylallyltranstransferase; EC=2.5.1.1; Farnesyl diphosphate synthase; Farnesyltranstransferase; EC=2.5.1.29; Geranyltranstransferase; EC=2.5.1.10; Flags: Precursor (At4g36810) | -1.828 |

|                 |                                                                                                                                                                                                                                                                                              |                                                                                                                                                                                                                                                                                                                                                                            |        |
|-----------------|----------------------------------------------------------------------------------------------------------------------------------------------------------------------------------------------------------------------------------------------------------------------------------------------|----------------------------------------------------------------------------------------------------------------------------------------------------------------------------------------------------------------------------------------------------------------------------------------------------------------------------------------------------------------------------|--------|
| Cs6g17490       | K13789 geranylgeranyl diphosphate synthase, type II [EC:2.5.1.1 2.5.1.10 2.5.1.29]   (RefSeq) geranylgeranyl pyrophosphate synthase 7, chloroplastic-like (A)                                                                                                                                | Heterodimeric geranylgeranyl pyrophosphate synthase large subunit 1, chloroplastic; GGPP synthase 1; GGPS1; EC=2.5.1.-; (2E,6E)-farnesyl diphosphate synthase 1; Dimethylallyltranstransferase 1; EC=2.5.1.1; Farnesyl diphosphate synthase 1; Farnesyltranstransferase 1; EC=2.5.1.29; Geranyltranstransferase 1; EC=2.5.1.10; Flags: Precursor (At4g36810)               | 3.885  |
| Cs3g25910       | K13811 3'-phosphoadenosine 5'-phosphosulfate synthase [EC:2.7.7.4 2.7.1.25]   (RefSeq) ATP sulfurylase 2 (A)                                                                                                                                                                                 | ATP sulfurylase 2; EC=2.7.7.4; Flags: Precursor (At1g19920)                                                                                                                                                                                                                                                                                                                | -1.519 |
| Cs3g12230       | K13832 3-dehydroquinate dehydratase / shikimate dehydrogenase [EC:4.2.1.10 1.1.1.25]   (RefSeq) bifunctional 3-dehydroquinate dehydratase/shikimate dehydrogenase, chloroplastic-like (A)                                                                                                    | Bifunctional 3-dehydroquinate dehydratase/shikimate dehydrogenase, chloroplastic; DHQ-SDH protein; DHQase-SORase; Protein EMBRYO DEFECTIVE 3004; Includes: Dehydroquinate dehydratase; DHQ; EC=4.2.1.10; Includes: Shikimate dehydrogenase; SDH; EC=1.1.1.25; Flags: Precursor (At3g06350)                                                                                 | -1.234 |
| Cs6g17580       | K14190 GDP-L-galactose phosphorylase [EC:2.7.7.69]   (RefSeq) GDP-L-galactose phosphorylase 1-like (A)                                                                                                                                                                                       | GDP-L-galactose phosphorylase 1; EC=2.7.7.69; Protein VITAMIN C DEFECTIVE 2 (At5g55120)                                                                                                                                                                                                                                                                                    | 1.636  |
| Cs8g19150       | K14424 methylsterol monooxygenase 2   (RefSeq) methylsterol monooxygenase 2-2 (A)                                                                                                                                                                                                            | Methylsterol monooxygenase 2-2; EC=1.14.18.9; Sterol 4-alpha-methyl-oxidase 1; AtSMO1; Sterol 4-alpha-methyl-oxidase 2-2 (At1g07420)                                                                                                                                                                                                                                       | -1.229 |
| Cs4g16050       | K14454 aspartate aminotransferase, cytoplasmic [EC:2.6.1.1]   (RefSeq) aspartate aminotransferase, cytoplasmic (A)                                                                                                                                                                           | Aspartate aminotransferase, cytoplasmic; EC=2.6.1.1; Transaminase A (At5g11520)                                                                                                                                                                                                                                                                                            | -1.328 |
| Cs2g15280       | K14455 aspartate aminotransferase, mitochondrial [EC:2.6.1.1]   (RefSeq) aspartate aminotransferase, mitochondrial-like (A)                                                                                                                                                                  | Aspartate aminotransferase, mitochondrial; EC=2.6.1.1; Transaminase A; Flags: Precursor (At2g30970)                                                                                                                                                                                                                                                                        | -1.142 |
| orange1.1t00747 | K14674 TAG lipase / steryl ester hydrolase / phospholipase A2 / LPA acyltransferase [EC:3.1.1.3 3.1.1.13 3.1.1.4 2.3.1.51]   (RefSeq) triacylglycerol lipase SDP1 (A)                                                                                                                        | Triacylglycerol lipase SDP1; EC=3.1.1.3; Protein SUGAR-DEPENDENT 1 (At5g04040)                                                                                                                                                                                                                                                                                             | -1.149 |
| Cs6g18320       | K14759 isochorismate synthase / 2-succinyl-5-enolpyruvyl-6-hydroxy-3-cyclohexene-1-carboxylate synthase / 2-succinyl-6-hydroxy-2,4-cyclohexadiene-1-carboxylate synthase / O-succinylbenzoate synthase [EC:5.4.4.2 2.2.1.9 4.2.99.20 4.2.1.113]   (RefSeq) protein PHYLLO, chloroplastic (A) | L-Ala-D/L-amino acid epimerase; EC=5.1.1.-; L-Ala-D/L-Xxx epimerase (At3g18270)                                                                                                                                                                                                                                                                                            | -3.166 |
| Cs7g12250       | K14759 isochorismate synthase / 2-succinyl-5-enolpyruvyl-6-hydroxy-3-cyclohexene-1-carboxylate synthase / 2-succinyl-6-hydroxy-2,4-cyclohexadiene-1-carboxylate synthase / O-succinylbenzoate synthase [EC:5.4.4.2 2.2.1.9 4.2.99.20 4.2.1.113]   (RefSeq) protein PHYLLO, chloroplastic (A) | Protein PHYLLO, chloroplastic; Includes: Inactive isochorismate synthase; MENF; Includes: 2-succinyl-5-enolpyruvyl-6-hydroxy-3-cyclohexene-1-carboxylate synthase; EC=2.2.1.9; MEND; Includes: o-succinylbenzoate synthase; EC=4.2.1.113; MENC; Includes: 2-succinyl-6-hydroxy-2,4-cyclohexadiene-1-carboxylate synthase; EC=4.2.99.20; MENH; Flags: Precursor (At1g68890) | 1.367  |
| Cs4g05200       | K15227 arogenate dehydrogenase (NADP+), plant [EC:1.3.1.78]   (RefSeq) arogenate dehydrogenase 1, chloroplastic (A)                                                                                                                                                                          | Arogenate dehydrogenase 1, chloroplastic; EC=1.3.1.78; TYRATC; TyrAAT1; Flags: Precursor (At5g34930)                                                                                                                                                                                                                                                                       | -1.581 |

|                 |                                                                                                                                                                                                    |                                                                                                                                                                                                                                                                                                                          |        |
|-----------------|----------------------------------------------------------------------------------------------------------------------------------------------------------------------------------------------------|--------------------------------------------------------------------------------------------------------------------------------------------------------------------------------------------------------------------------------------------------------------------------------------------------------------------------|--------|
| orange1.1t00556 | K15397 3-ketoacyl-CoA synthase [EC:2.3.1.199]   (RefSeq) 3-ketoacyl-CoA synthase 1 (A)                                                                                                             | 3-ketoacyl-CoA synthase 1 {ECO:0000303 PubMed:10074711}; KCS-1 {ECO:0000303 PubMed:10074711}; EC=2.3.1.199 {ECO:0000269 PubMed:10074711, ECO:0000269 PubMed:16765910}; Very long-chain fatty acid condensing enzyme 1 {ECO:0000303 PubMed:10074711}; VLCFA condensing enzyme 1 {ECO:0000303 PubMed:10074711} (At1g01120) | -1.870 |
| Cs1g02760       | K15404 aldehyde decarbonylase [EC:4.1.99.5]   (RefSeq) protein ECERIFERUM 1 (A)                                                                                                                    | Protein ECERIFERUM 1 (At1g02190)                                                                                                                                                                                                                                                                                         | -2.276 |
| Cs5g24730       | K15744 zeta-carotene isomerase [EC:5.2.1.12]   (RefSeq) 15-cis-zeta-carotene isomerase, chloroplastic (A)                                                                                          | 15-cis-zeta-carotene isomerase, chloroplastic; EC=5.2.1.12; Flags: Precursor (At1g10830)                                                                                                                                                                                                                                 | 1.689  |
| orange1.1t01058 | K15747 beta-ring hydroxylase [EC:1.14.-.-]   (RefSeq) protein LUTEIN DEFICIENT 5, chloroplastic (A)                                                                                                | Protein LUTEIN DEFICIENT 5, chloroplastic; EC=1.14.-.-; Cytochrome P450 97A3; Flags: Precursor (At1g31800)                                                                                                                                                                                                               | 2.322  |
| Cs2g08460       | K15813 beta-amyrin synthase [EC:5.4.99.39]   (RefSeq) beta-amyrin synthase-like (A)                                                                                                                | Lupeol synthase; KdLUS; EC=5.4.99.41 (At1g78960)                                                                                                                                                                                                                                                                         | -2.992 |
| Cs8g02560       | K15893 hydroxypyruvate reductase 1   (RefSeq) glycerate dehydrogenase (A)                                                                                                                          | Glycerate dehydrogenase HPR, peroxisomal; GDH; EC=1.1.1.29; NADH-dependent hydroxypyruvate reductase 1; AtHPR1; HPR 1 (At1g68010)                                                                                                                                                                                        | -1.532 |
| Cs5g05200       | K16055 trehalose 6-phosphate synthase/phosphatase [EC:2.4.1.15 3.1.3.12]   (RefSeq) probable alpha,alpha-trehalose-phosphate synthase [UDP-forming] 9 (A)                                          | Probable alpha,alpha-trehalose-phosphate synthase [UDP-forming] 9; EC=2.4.1.15; Trehalose-6-phosphate synthase 9; AtTPS9 (At1g23870)                                                                                                                                                                                     | -2.183 |
| Cs7g08390       | K16055 trehalose 6-phosphate synthase/phosphatase [EC:2.4.1.15 3.1.3.12]   (RefSeq) probable alpha,alpha-trehalose-phosphate synthase [UDP-forming] 9 (A)                                          | Probable alpha,alpha-trehalose-phosphate synthase [UDP-forming] 9; EC=2.4.1.15; Trehalose-6-phosphate synthase 9; AtTPS9 (At1g23870)                                                                                                                                                                                     | -2.070 |
| Cs2g05010       | K16818 phospholipase A1 [EC:3.1.1.32]   (RefSeq) phospholipase A(1) DAD1, chloroplastic-like (A)                                                                                                   | Phospholipase A1-IIgamma; EC=3.1.1.-; DAD1-like seedling establishment-related lipase; AtDSEL; Phospholipase DSEL (At4g18550)                                                                                                                                                                                            | -2.253 |
| Cs5g08030       | K16818 phospholipase A1 [EC:3.1.1.32]   (RefSeq) phospholipase A(1) DAD1, chloroplastic-like (A)                                                                                                   | Phospholipase A1-Ibeta2, chloroplastic; EC=3.1.1.-; Flags: Precursor (At4g16820)                                                                                                                                                                                                                                         | -1.206 |
| Cs3g10600       | K17744 L-galactose dehydrogenase [EC:1.1.1.316]   (RefSeq) L-galactose dehydrogenase (A)                                                                                                           | Probable aldo-keto reductase 1; GmAKR1; EC=1.1.1.- (At1g60750)                                                                                                                                                                                                                                                           | 1.668  |
| Cs5g30540       | K17911 beta-carotene isomerase [EC:5.2.1.14]   (RefSeq) beta-carotene isomerase D27, chloroplastic (A)                                                                                             | Beta-carotene isomerase D27, chloroplastic; EC=5.2.1.14; Protein DWARF-27; Flags: Precursor (At1g64680)                                                                                                                                                                                                                  | 5.919  |
| Cs1g25090       | K17912 9-cis-beta-carotene 9',10'-cleaving dioxygenase [EC:1.13.11.68]   (RefSeq) carotenoid cleavage dioxygenase 7, chloroplastic (A)                                                             | Carotenoid cleavage dioxygenase 7, chloroplastic; AtCCD7; AtNCED7; Beta,beta-carotene 9',10'-oxygenase; EC=1.13.11.68; Protein MORE AXILLARY BRANCHING 3; Protein MORE AXILLARY GROWTH 3; Flags: Precursor (At2g44990)                                                                                                   | 7.476  |
| Cs4g19460       | K17913 carlactone synthase / all-trans-10'-apo-beta-carotenal 13,14-cleaving dioxygenase [EC:1.13.11.69 1.13.11.70]   (RefSeq) carotenoid cleavage dioxygenase 8 homolog B, chloroplastic-like (A) | Carotenoid cleavage dioxygenase 8 homolog B, chloroplastic; OsCCD8b; EC=1.13.11.69 {ECO:0000269 PubMed:22422982}; EC=1.13.11.70                                                                                                                                                                                          | 6.102  |

|                 |                                                                                                                                                                                                    |                                                                                                                                                                                                                                     |        |
|-----------------|----------------------------------------------------------------------------------------------------------------------------------------------------------------------------------------------------|-------------------------------------------------------------------------------------------------------------------------------------------------------------------------------------------------------------------------------------|--------|
|                 |                                                                                                                                                                                                    | {ECO:0000269 PubMed:18637791}; Protein DWARF-10; Protein MAX4 homolog; Flags: Precursor (At4g32810)                                                                                                                                 |        |
| Cs4g19470       | K17913 carlactone synthase / all-trans-10'-apo-beta-carotenal 13,14-cleaving dioxygenase [EC:1.13.11.69 1.13.11.70]   (RefSeq) carotenoid cleavage dioxygenase 8 homolog B, chloroplastic-like (A) | Carotenoid cleavage dioxygenase 8 homolog B, chloroplastic; OsCCD8b; EC=1.13.11.69 {ECO:0000269 PubMed:22422982}; EC=1.13.11.70 {ECO:0000269 PubMed:18637791}; Protein DWARF-10; Protein MAX4 homolog; Flags: Precursor (At4g32810) | -1.097 |
| Cs2g13120       | K18693 diacylglycerol diphosphate phosphatase / phosphatidate phosphatase [EC:3.1.3.81 3.1.3.4]   (RefSeq) lipid phosphate phosphatase 2-like (A)                                                  | Lipid phosphate phosphatase 2; AtLPP2; EC=3.1.3.-; Phosphatidic acid phosphatase 2; AtPAP2; Prenyl diphosphate phosphatase (At1g15080)                                                                                              | -1.115 |
| Cs7g18910       | K20623 typhasterol/6-deoxytyphasterol 2alpha-hydroxylase   (RefSeq) cytochrome P450 71A1-like (A)                                                                                                  | 3,9-dihydroxypterocarpan 6A-monooxygenase; EC=1.14.13.28; Cytochrome P450 93A1; Dihydroxypterocarpan 6a-hydroxylase; D6aH (At5g06900)                                                                                               | 2.619  |
| Cs9g13830       | K20623 typhasterol/6-deoxytyphasterol 2alpha-hydroxylase   (RefSeq) cytochrome P450 71A1-like (A)                                                                                                  | Cytochrome P450 93A3; EC=1.14.-.-; Cytochrome P450 CP5 (At2g42250)                                                                                                                                                                  | 1.711  |
| orange1.1t01321 | K20623 typhasterol/6-deoxytyphasterol 2alpha-hydroxylase   (RefSeq) cytochrome P450 71A1-like (A)                                                                                                  | Cytochrome P450 71A1; EC=1.14.-.-; ARP-2; CYPLXXIA1 (At5g07990)                                                                                                                                                                     | -1.486 |
| orange1.1t04499 | K20623 typhasterol/6-deoxytyphasterol 2alpha-hydroxylase   (RefSeq) cytochrome P450 71A1-like (A)                                                                                                  | Flavonoid 3'-monooxygenase; EC=1.14.13.21; Cytochrome P450 75B1; Flavonoid 3'-hydroxylase; AtF3'H; Protein TRANSPARENT TESTA 7 (At5g07990)                                                                                          | -1.573 |
| Cs1g19780       | K20884 riboflavin kinase / FMN hydrolase [EC:2.7.1.26 3.1.3.102]   (RefSeq) bifunctional riboflavin kinase/FMN phosphatase (A)                                                                     | Haloacid dehalogenase-like hydrolase domain-containing protein At4g39970; EC=3.1.3.-; Flags: Precursor (At4g39970)                                                                                                                  | 1.960  |
| Cs4g03480       | K20884 riboflavin kinase / FMN hydrolase [EC:2.7.1.26 3.1.3.102]   (RefSeq) bifunctional riboflavin kinase/FMN phosphatase (A)                                                                     | (DL)-glycerol-3-phosphatase 2; EC=3.1.3.21; Glycerol-1-phosphatase 2; Haloacid dehalogenase-like hydrolase domain-containing protein GPP2 (At5g57440)                                                                               | -1.545 |
| Cs5g06660       | K20884 riboflavin kinase / FMN hydrolase [EC:2.7.1.26 3.1.3.102]   (RefSeq) bifunctional riboflavin kinase/FMN phosphatase (A)                                                                     | CBBY-like protein {ECO:0000303 PubMed:27246049}; AtCbby {ECO:0000303 PubMed:27246049}; EC=3.1.3.- {ECO:0000269 PubMed:27246049}; Flags: Precursor (At3g48420 1)                                                                     | 1.072  |
| Cs2g16220       | K21568 pinoresinol/lariciresinol reductase [EC:1.23.1.1 1.23.1.2 1.23.1.3 1.23.1.4]   (RefSeq) bifunctional pinoresinol-lariciresinol reductase 2 (A)                                              | Isoflavone reductase homolog PCBER {ECO:0000305}; EC=1.3.1.- {ECO:0000269 PubMed:10066819}; Phenylcoumaran benzylic ether reductase POP1 {ECO:0000303 PubMed:10066819}; PCBER-Pop1 {ECO:0000303 PubMed:10066819} (At4g39230)        | -1.000 |
| Cs2g16260       | K21568 pinoresinol/lariciresinol reductase [EC:1.23.1.1 1.23.1.2 1.23.1.3 1.23.1.4]   (RefSeq) bifunctional pinoresinol-lariciresinol reductase 2 (A)                                              | Isoflavone reductase homolog PCBER {ECO:0000305}; EC=1.3.1.- {ECO:0000269 PubMed:10066819}; Phenylcoumaran benzylic ether reductase POP1 {ECO:0000303 PubMed:10066819}; PCBER-Pop1 {ECO:0000303 PubMed:10066819} (At4g39230)        | -1.765 |
| Cs3g25010       | K21568 pinoresinol/lariciresinol reductase [EC:1.23.1.1 1.23.1.2 1.23.1.3 1.23.1.4]   (RefSeq) bifunctional pinoresinol-lariciresinol reductase 2 (A)                                              | Isoflavone reductase homolog TP7 {ECO:0000305}; EC=1.3.1.- {ECO:0000269 PubMed:12369619}; Phenylcoumaran benzylic ether reductase TP7 {ECO:0000305}; NtPCBER {ECO:0000305}; Protein TOBACCO PETAL 7 {ECO:0000305} (At1g75280)       | -1.676 |

|                                                                           |                                                                                                               |                                                                                                                                                                                     |        |
|---------------------------------------------------------------------------|---------------------------------------------------------------------------------------------------------------|-------------------------------------------------------------------------------------------------------------------------------------------------------------------------------------|--------|
| Cs6g03540                                                                 | K22389 phospholipase A1 [EC:3.1.1.32]   (RefSeq) phospholipase A(1) LCAT3 (A)                                 | Phospholipase A(1) LCAT3; EC=3.1.1.32; Lecithin-cholesterol acyltransferase-like 3 (At3g03310)                                                                                      | -1.030 |
| Cs2g10060                                                                 | K22395 cinnamyl-alcohol dehydrogenase [EC:1.1.1.195]   (RefSeq) flavin-dependent oxidoreductase FOX2 (A)      | Berberine bridge enzyme-like 22 {ECO:0000303 PubMed:26037923}; AtBBE-like 22 {ECO:0000303 PubMed:26037923}; EC=1.1.1.- {ECO:0000250 UniProtKB:O64743}; Flags: Precursor (At4g20860) | 1.304  |
| Cs2g10120                                                                 | K22395 cinnamyl-alcohol dehydrogenase [EC:1.1.1.195]   (RefSeq) flavin-dependent oxidoreductase FOX2-like (A) | Cannabidiolic acid synthase; EC=1.21.3.8; CBDA synthase; Flags: Precursor (At4g20820)                                                                                               | 2.392  |
| Cs2g10200                                                                 | K22395 cinnamyl-alcohol dehydrogenase [EC:1.1.1.195]   (RefSeq) flavin-dependent oxidoreductase FOX2-like (A) | Cannabidiolic acid synthase; EC=1.21.3.8; CBDA synthase; Flags: Precursor (At5g44440)                                                                                               | 6.074  |
| Cs2g10230                                                                 | K22395 cinnamyl-alcohol dehydrogenase [EC:1.1.1.195]   (RefSeq) flavin-dependent oxidoreductase FOX2-like (A) | Berberine bridge enzyme-like 14 {ECO:0000303 PubMed:26037923}; AtBBE-like 14 {ECO:0000303 PubMed:26037923}; EC=1.1.1.- {ECO:0000250 UniProtKB:O64743}; Flags: Precursor (At1g34570) | 1.569  |
| Cs3g10950                                                                 | K22395 cinnamyl-alcohol dehydrogenase [EC:1.1.1.195]   (RefSeq) flavin-dependent oxidoreductase FOX2 (A)      | Berberine bridge enzyme-like 8 {ECO:0000303 PubMed:26037923}; AtBBE-like 8 {ECO:0000303 PubMed:26037923}; EC=1.1.1.- {ECO:0000250 UniProtKB:O64743}; Flags: Precursor (At1g30700)   | -1.024 |
| Cs5g18590                                                                 | K22395 cinnamyl-alcohol dehydrogenase [EC:1.1.1.195]   (RefSeq) flavin-dependent oxidoreductase FOX2-like (A) | Reticuline oxidase; EC=1.21.3.3; Berberine bridge-forming enzyme; BBE; Tetrahydropyridoxyl synthase; Flags: Precursor (At5g44380)                                                   | 6.963  |
| orange1.1t01951                                                           | K22395 cinnamyl-alcohol dehydrogenase [EC:1.1.1.195]   (RefSeq) flavin-dependent oxidoreductase FOX2-like (A) | Berberine bridge enzyme-like 18 {ECO:0000303 PubMed:26037923}; AtBBE-like 18 {ECO:0000303 PubMed:26037923}; EC=1.1.1.- {ECO:0000250 UniProtKB:O64743}; Flags: Precursor (At4g20820) | -1.397 |
| orange1.1t05417                                                           | K22395 cinnamyl-alcohol dehydrogenase [EC:1.1.1.195]   (RefSeq) flavin-dependent oxidoreductase FOX2-like (A) | Berberine bridge enzyme-like 18 {ECO:0000303 PubMed:26037923}; AtBBE-like 18 {ECO:0000303 PubMed:26037923}; EC=1.1.1.- {ECO:0000250 UniProtKB:O64743}; Flags: Precursor (At4g20820) | -1.102 |
| novel.1498                                                                | K22395 cinnamyl-alcohol dehydrogenase [EC:1.1.1.195]   (RefSeq) flavin-dependent oxidoreductase FOX2 (A)      | Cannabidiolic acid synthase; EC=1.21.3.8; CBDA synthase; Flags: Precursor (At4g20860)                                                                                               | 4.003  |
| Cs1g09360                                                                 | K23260 scopoletin glucosyltransferase [EC:2.4.1.128]   (RefSeq) scopoletin glucosyltransferase-like (A)       | UDP-glycosyltransferase 92A1; EC=2.4.1.- (At5g12890)                                                                                                                                | -2.876 |
| Cs5g24640                                                                 | K23260 scopoletin glucosyltransferase [EC:2.4.1.128]   (RefSeq) scopoletin glucosyltransferase-like (A)       | UDP-glycosyltransferase 76F1; EC=2.4.1.- (At3g55700)                                                                                                                                | 2.191  |
| orange1.1t03150                                                           | K23260 scopoletin glucosyltransferase [EC:2.4.1.128]   (RefSeq) scopoletin glucosyltransferase-like (A)       | UDP-glycosyltransferase 92A1; EC=2.4.1.- (At5g12890)                                                                                                                                | -1.583 |
| orange1.1t03151                                                           | K23260 scopoletin glucosyltransferase [EC:2.4.1.128]   (RefSeq) scopoletin glucosyltransferase-like (A)       | UDP-glycosyltransferase 92A1; EC=2.4.1.- (At5g12890)                                                                                                                                | -1.376 |
| <b>Phenylpropanoid biosynthesis (ko00940, <math>P &lt; 0.0001</math>)</b> |                                                                                                               |                                                                                                                                                                                     |        |

|           |                                                                                       |                                                                                                                |        |
|-----------|---------------------------------------------------------------------------------------|----------------------------------------------------------------------------------------------------------------|--------|
| Cs1g15010 | K00430 peroxidase [EC:1.11.1.7]   (RefSeq) putative Peroxidase 48 (A)                 | Putative Peroxidase 48; Atperox P48; EC=1.11.1.7; Flags: Precursor (At4g33870)                                 | -2.263 |
| Cs1g19890 | K00430 peroxidase [EC:1.11.1.7]   (RefSeq) peroxidase 17 (A)                          | Peroxidase 17; Atperox P17; EC=1.11.1.7; ATP25a; Flags: Precursor (At2g22420)                                  | -1.915 |
| Cs1g20230 | K00430 peroxidase [EC:1.11.1.7]   (RefSeq) peroxidase 4-like (A)                      | Peroxidase 4 {ECO:0000250 UniProtKB:Q42578}; EC=1.11.1.7; Flags: Precursor (At5g05340)                         | -2.964 |
| Cs1g21860 | K00430 peroxidase [EC:1.11.1.7]   (RefSeq) peroxidase 51-like (A)                     | Peroxidase 73; Atperox P73; EC=1.11.1.7; ATP10a; PRXR11; Flags: Precursor (At5g67400)                          | -2.185 |
| Cs1g24640 | K00430 peroxidase [EC:1.11.1.7]   (RefSeq) peroxidase 72 (A)                          | Peroxidase 72; Atperox P72; EC=1.11.1.7; ATP6a; PRXR8; Flags: Precursor (At5g66390)                            | -2.627 |
| Cs1g25930 | K00430 peroxidase [EC:1.11.1.7]   (RefSeq) peroxidase 64-like (A)                     | Peroxidase 64; Atperox P64; EC=1.11.1.7; ATP17a; PRXR4; Flags: Precursor (At5g42180)                           | -1.964 |
| Cs2g03110 | K00430 peroxidase [EC:1.11.1.7]   (RefSeq) peroxidase 42 (A)                          | Peroxidase 42; Atperox P42; EC=1.11.1.7; ATP1a/ATP1b; PRXR1; Flags: Precursor (At4g21960)                      | -1.812 |
| Cs2g05220 | K00430 peroxidase [EC:1.11.1.7]   (RefSeq) peroxidase 19 (A)                          | Peroxidase 19; Atperox P19; EC=1.11.1.7; ATP51; Flags: Precursor (At2g34060)                                   | -3.122 |
| Cs2g21810 | K00430 peroxidase [EC:1.11.1.7]   (RefSeq) peroxidase 27 (A)                          | Peroxidase 27; Atperox P27; EC=1.11.1.7; ATP12a; PRXR7; Flags: Precursor (At3g01190)                           | -2.629 |
| Cs2g21820 | K00430 peroxidase [EC:1.11.1.7]   (RefSeq) peroxidase 30 (A)                          | Peroxidase 30; Atperox P30; EC=1.11.1.7; ATP7a; PRXR9; Flags: Precursor (At3g21770)                            | -2.920 |
| Cs2g28110 | K00430 peroxidase [EC:1.11.1.7]   (RefSeq) peroxidase P7-like (A)                     | Peroxidase 4 {ECO:0000250 UniProtKB:Q42578}; EC=1.11.1.7; Flags: Precursor (At5g05340)                         | -1.149 |
| Cs3g02310 | K00430 peroxidase [EC:1.11.1.7]   (RefSeq) lignin-forming anionic peroxidase-like (A) | Lignin-forming anionic peroxidase; EC=1.11.1.7; Flags: Precursor (At1g14550)                                   | -2.149 |
| Cs3g20770 | K00430 peroxidase [EC:1.11.1.7]   (RefSeq) peroxidase 13 (A)                          | Peroxidase 13; Atperox P13; EC=1.11.1.7; Flags: Precursor (At1g77100_1)                                        | 8.534  |
| Cs3g21730 | K00430 peroxidase [EC:1.11.1.7]   (RefSeq) peroxidase 12 (A)                          | Peroxidase 12; Atperox P12; EC=1.11.1.7; ATP4a; PRXR6; Flags: Precursor (At1g71695)                            | -1.517 |
| Cs3g25300 | K00430 peroxidase [EC:1.11.1.7]   (RefSeq) peroxidase 9 (A)                           | Peroxidase 9; Atperox P9; EC=1.11.1.7; ATP18a; Flags: Precursor (At1g44970)                                    | -2.503 |
| Cs3g26600 | K00430 peroxidase [EC:1.11.1.7]   (RefSeq) peroxidase 64 (A)                          | Peroxidase 64; Atperox P64; EC=1.11.1.7; ATP17a; PRXR4; Flags: Precursor (At5g42180)                           | -2.278 |
| Cs4g17860 | K00430 peroxidase [EC:1.11.1.7]   (RefSeq) peroxidase 25 (A)                          | Peroxidase 25; Atperox P25; EC=1.11.1.7; Flags: Precursor (At2g41480)                                          | 1.546  |
| Cs5g32270 | K00430 peroxidase [EC:1.11.1.7]   (RefSeq) peroxidase 3 (A)                           | Peroxidase 3; Atperox P3; EC=1.11.1.7; ATPRC; RCI3A; Rare cold-inducible protein; Flags: Precursor (At1g05260) | -2.477 |
| Cs6g04560 | K00430 peroxidase [EC:1.11.1.7]   (RefSeq) peroxidase 21 (A)                          | Peroxidase 21; Atperox P21; EC=1.11.1.7; ATP2a/ATP2b; PRXR5; Flags: Precursor (At2g37130)                      | -2.280 |

|                 |                                                                                                                           |                                                                                                                                                                                                                                                         |        |
|-----------------|---------------------------------------------------------------------------------------------------------------------------|---------------------------------------------------------------------------------------------------------------------------------------------------------------------------------------------------------------------------------------------------------|--------|
| Cs6g09680       | K00430 peroxidase [EC:1.11.1.7]   (RefSeq) cationic peroxidase 1-like (A)                                                 | Cationic peroxidase 1; EC=1.11.1.7; PNPC1; Flags: Precursor (At5g05340)                                                                                                                                                                                 | -2.115 |
| Cs6g20170       | K00430 peroxidase [EC:1.11.1.7]   (RefSeq) peroxidase 31-like (A)                                                         | Peroxidase 63; Atperox P63; EC=1.11.1.7; ATP26a; Flags: Precursor (At5g40150)                                                                                                                                                                           | -1.099 |
| Cs7g13530       | K00430 peroxidase [EC:1.11.1.7]   (RefSeq) peroxidase 65-like (A)                                                         | Peroxidase 65; Atperox P65; EC=1.11.1.7; ATP43; Flags: Precursor (At5g47000)                                                                                                                                                                            | -3.439 |
| Cs9g05130       | K00430 peroxidase [EC:1.11.1.7]   (RefSeq) peroxidase 3-like (A)                                                          | Peroxidase 3; Atperox P3; EC=1.11.1.7; ATPRC; RCI3A; Rare cold-inducible protein; Flags: Precursor (At1g05260)                                                                                                                                          | -2.828 |
| orange1.1t02033 | K00430 peroxidase [EC:1.11.1.7]   (RefSeq) peroxidase 59-like (A)                                                         | Peroxidase N; EC=1.11.1.7; Neutral peroxidase; Flags: Precursor (At5g19890)                                                                                                                                                                             | 1.411  |
| orange1.1t02041 | K00430 peroxidase [EC:1.11.1.7]   (RefSeq) peroxidase A2 (A)                                                              | Peroxidase C3; EC=1.11.1.7; Flags: Precursor (At5g06720)                                                                                                                                                                                                | -1.448 |
| orange1.1t02044 | K00430 peroxidase [EC:1.11.1.7]   (RefSeq) peroxidase E5-like (A)                                                         | Peroxidase C3; EC=1.11.1.7; Flags: Precursor (At2g38390)                                                                                                                                                                                                | -1.910 |
| orange1.1t02045 | K00430 peroxidase [EC:1.11.1.7]   (RefSeq) peroxidase 15-like (A)                                                         | Peroxidase 15 {ECO:0000303 PubMed:17936696}; Prx15 {ECO:0000303 PubMed:17936696}; EC=1.11.1.7; Anionic peroxidase {ECO:0000303 PubMed:17936696}; Flags: Precursor (At5g06720)                                                                           | -1.207 |
| orange1.1t02046 | K00430 peroxidase [EC:1.11.1.7]   (RefSeq) peroxidase A2 (A)                                                              | Peroxidase 15 {ECO:0000303 PubMed:17936696}; Prx15 {ECO:0000303 PubMed:17936696}; EC=1.11.1.7; Anionic peroxidase {ECO:0000303 PubMed:17936696}; Flags: Precursor (At5g06730)                                                                           | -1.040 |
| orange1.1t02225 | K00430 peroxidase [EC:1.11.1.7]   (RefSeq) LOW QUALITY PROTEIN: peroxidase A2-like (A)                                    | Peroxidase 53; Atperox P53; EC=1.11.1.7; ATPA2; Flags: Precursor (At5g06720)                                                                                                                                                                            | -1.825 |
| novel.242       | K00430 peroxidase [EC:1.11.1.7]   (RefSeq) peroxidase P7-like (A)                                                         | Peroxidase 52; Atperox P52; EC=1.11.1.7; ATP49; Flags: Precursor (At5g05340)                                                                                                                                                                            | -2.455 |
| Cs1g22450       | K00588 caffeoyl-CoA O-methyltransferase [EC:2.1.1.104]   (RefSeq) caffeoyl-CoA O-methyltransferase-like (A)               | Caffeoyl-CoA O-methyltransferase; EC=2.1.1.104; Trans-caffeoyl-CoA 3-O-methyltransferase; CCoAMT; CCoAOMT (At4g34050)                                                                                                                                   | -1.416 |
| Cs4g13440       | K00588 caffeoyl-CoA O-methyltransferase [EC:2.1.1.104]   (RefSeq) probable caffeoyl-CoA O-methyltransferase At4g26220 (A) | Probable caffeoyl-CoA O-methyltransferase At4g26220; EC=2.1.1.104; Trans-caffeoyl-CoA 3-O-methyltransferase; CCoAMT; CCoAOMT (At4g26220)                                                                                                                | -1.712 |
| Cs6g04150       | K00588 caffeoyl-CoA O-methyltransferase [EC:2.1.1.104]   (RefSeq) caffeoyl-CoA O-methyltransferase-like (A)               | Caffeoyl-CoA O-methyltransferase; EC=2.1.1.104; Trans-caffeoyl-CoA 3-O-methyltransferase; CCoAMT; CCoAOMT (At4g34050)                                                                                                                                   | -1.272 |
| Cs5g07030       | K01188 beta-glucosidase [EC:3.2.1.21]   (RefSeq) beta-glucosidase 24-like (A)                                             | Beta-glucosidase 24; Os6bglu24; EC=3.2.1.21; Flags: Precursor (At5g44640)                                                                                                                                                                               | 7.377  |
| Cs5g07040       | K01188 beta-glucosidase [EC:3.2.1.21]   (RefSeq) vicianin hydrolase-like (A)                                              | Furostanol glycoside 26-O-beta-glucosidase {ECO:0000303 PubMed:8766714}; CsF26G {ECO:0000303 PubMed:8766714}; EC=3.2.1.186 {ECO:0000269 PubMed:8549824, ECO:0000269 PubMed:8766714}; Protodioscin 26-O-beta-D-glucosidase; Flags: Precursor (At5g54570) | 7.202  |
| Cs7g01360       | K01188 beta-glucosidase [EC:3.2.1.21]   (RefSeq) beta-glucosidase 12-like (A)                                             | Beta-glucosidase 12 {ECO:0000305}; EC=3.2.1.21 {ECO:0000305}; Flags: Precursor (At5g44640)                                                                                                                                                              | -1.151 |

|                 |                                                                                                       |                                                                                                                                                                                                                                                                                                                                                                                                                                                                           |        |
|-----------------|-------------------------------------------------------------------------------------------------------|---------------------------------------------------------------------------------------------------------------------------------------------------------------------------------------------------------------------------------------------------------------------------------------------------------------------------------------------------------------------------------------------------------------------------------------------------------------------------|--------|
| Cs8g03370       | K01188 beta-glucosidase [EC:3.2.1.21]   (RefSeq) beta-glucosidase 11-like (A)                         | Beta-glucosidase 11; AtBGLU11; EC=3.2.1.21; Flags: Precursor (At1g02850)                                                                                                                                                                                                                                                                                                                                                                                                  | 2.141  |
| Cs4g03330       | K01904 4-coumarate--CoA ligase [EC:6.2.1.12]   (RefSeq) 4-coumarate--CoA ligase 2-like (A)            | 4-coumarate--CoA ligase 1; 4CL 1; EC=6.2.1.12; 4-coumaroyl-CoA synthase 1 (At3g21240)                                                                                                                                                                                                                                                                                                                                                                                     | 1.106  |
| Cs5g06990       | K01904 4-coumarate--CoA ligase [EC:6.2.1.12]   (RefSeq) 4-coumarate--CoA ligase-like 9 isoform X1 (A) | 4-coumarate--CoA ligase-like 9; EC=6.2.1.-; 4-coumarate--CoA ligase isoform 4; At4CL4 (At5g63380)                                                                                                                                                                                                                                                                                                                                                                         | 1.888  |
| orange1.1t01913 | K01904 4-coumarate--CoA ligase [EC:6.2.1.12]   (RefSeq) 4-coumarate--CoA ligase-like 9 isoform X1 (A) | 4-coumarate--CoA ligase-like 6; EC=6.2.1.- (At1g20510)                                                                                                                                                                                                                                                                                                                                                                                                                    | 1.188  |
| Cs7g23860       | K05349 beta-glucosidase [EC:3.2.1.21]   (RefSeq) beta-glucosidase BoGH3B-like (A)                     | Beta-xylosidase/alpha-L-arabinofuranosidase 2 {ECO:0000303 PubMed:17615411, ECO:0000312 EMBL:ABQ45228.1}; Xylan 1,4-beta-xylosidase/Alpha-L-arabinofuranosidase 2; MsXyl2 {ECO:0000303 PubMed:17615411}; Includes: Beta-xylosidase; EC=3.2.1.37; 1,4-beta-D-xylan xylohydrolase {ECO:0000250 UniProtKB:P48792}; Xylan 1,4-beta-xylosidase; Includes: Alpha-L-arabinofuranosidase; Arabinosidase {ECO:0000250 UniProtKB:P48792}; EC=3.2.1.55; Flags: Precursor (At5g20950) | -1.339 |
| Cs8g13800       | K05349 beta-glucosidase [EC:3.2.1.21]   (RefSeq) beta-glucosidase BoGH3B-like (A)                     | Beta-xylosidase/alpha-L-arabinofuranosidase 2 {ECO:0000303 PubMed:17615411, ECO:0000312 EMBL:ABQ45228.1}; Xylan 1,4-beta-xylosidase/Alpha-L-arabinofuranosidase 2; MsXyl2 {ECO:0000303 PubMed:17615411}; Includes: Beta-xylosidase; EC=3.2.1.37; 1,4-beta-D-xylan xylohydrolase {ECO:0000250 UniProtKB:P48792}; Xylan 1,4-beta-xylosidase; Includes: Alpha-L-arabinofuranosidase; Arabinosidase {ECO:0000250 UniProtKB:P48792}; EC=3.2.1.55; Flags: Precursor (At5g20950) | -2.435 |
| Cs8g19870       | K05349 beta-glucosidase [EC:3.2.1.21]   (RefSeq) beta-glucosidase BoGH3B-like (A)                     | Beta-D-xylosidase 1; AtBXL1; EC=3.2.1.-; Alpha-L-arabinofuranosidase; EC=3.2.1.55; Flags: Precursor (At3g47000)                                                                                                                                                                                                                                                                                                                                                           | 1.672  |
| orange1.1t00039 | K05350 beta-glucosidase [EC:3.2.1.21]   (RefSeq) beta-glucosidase 44-like (A)                         | Beta-glucosidase 44; AtBGLU44; EC=3.2.1.21; Flags: Precursor (At3g18080)                                                                                                                                                                                                                                                                                                                                                                                                  | -1.481 |
| Cs4g12530       | K06892 feruloyl-CoA ortho-hydroxylase [EC:1.14.11.-]   (RefSeq) feruloyl CoA ortho-hydroxylase 1 (A)  | Feruloyl CoA ortho-hydroxylase 1; EC=1.14.11.- (At3g12900)                                                                                                                                                                                                                                                                                                                                                                                                                | 2.579  |
| Cs4g12540       | K06892 feruloyl-CoA ortho-hydroxylase [EC:1.14.11.-]   (RefSeq) feruloyl CoA ortho-hydroxylase 1 (A)  | Feruloyl CoA ortho-hydroxylase 1; EC=1.14.11.- (At3g12900)                                                                                                                                                                                                                                                                                                                                                                                                                | -2.707 |
| Cs3g01140       | K09753 cinnamoyl-CoA reductase [EC:1.2.1.44]   (RefSeq) cinnamoyl-CoA reductase 1-like (A)            | Cinnamoyl-CoA reductase 2; AtCCR2; EC=1.2.1.44 (At2g02400)                                                                                                                                                                                                                                                                                                                                                                                                                | 1.154  |
| Cs3g01270       | K09753 cinnamoyl-CoA reductase [EC:1.2.1.44]   (RefSeq) cinnamoyl-CoA reductase 1-like (A)            | Cinnamoyl-CoA reductase 1 {ECO:0000305}; OsCCR1 {ECO:0000303 PubMed:16380417}; EC=1.2.1.44 {ECO:0000269 PubMed:16380417} (At2g02400)                                                                                                                                                                                                                                                                                                                                      | -1.007 |

|                 |                                                                                                                           |                                                                                                                                                                                                              |        |
|-----------------|---------------------------------------------------------------------------------------------------------------------------|--------------------------------------------------------------------------------------------------------------------------------------------------------------------------------------------------------------|--------|
| Cs3g13090       | K09753 cinnamoyl-CoA reductase [EC:1.2.1.44]   (RefSeq) cinnamoyl-CoA reductase 1-like (A)                                | Cinnamoyl-CoA reductase 1 {ECO:0000305}; OsCCR1 {ECO:0000303 PubMed:16380417}; EC=1.2.1.44 {ECO:0000269 PubMed:16380417} (At2g33590)                                                                         | 1.330  |
| Cs7g02080       | K09753 cinnamoyl-CoA reductase [EC:1.2.1.44]   (RefSeq) cinnamoyl-CoA reductase 1-like (A)                                | Tetraketide alpha-pyrone reductase 1; EC=1.1.1.-; Protein DIHYDROFLAVONOL 4-REDUCTASE-LIKE 1 (At5g19440)                                                                                                     | 1.202  |
| orange1.1t02754 | K09753 cinnamoyl-CoA reductase [EC:1.2.1.44]   (RefSeq) cinnamoyl-CoA reductase 1-like (A)                                | Cinnamoyl-CoA reductase 1; AtCCR1; EC=1.2.1.44; Protein IRREGULAR XYLEM 4 (At1g15950)                                                                                                                        | -1.095 |
| novel.735       | K12356 coniferyl-alcohol glucosyltransferase [EC:2.4.1.111]   (RefSeq) UDP-glycosyltransferase 72E1 (A)                   | UDP-glycosyltransferase 72E1; EC=2.4.1.- (At3g50740)                                                                                                                                                         | 1.247  |
| Cs1g05910       | K13065 shikimate O-hydroxycinnamoyltransferase [EC:2.3.1.133]   (RefSeq) vinorine synthase-like (A)                       | Salutaridinol 7-O-acetyltransferase {ECO:0000303 PubMed:11404355}; salAT {ECO:0000303 PubMed:11404355}; EC=2.3.1.150 {ECO:0000269 PubMed:11404355, ECO:0000269 PubMed:8537369} (At3g26040)                   | -1.949 |
| Cs1g05920       | K13065 shikimate O-hydroxycinnamoyltransferase [EC:2.3.1.133]   (RefSeq) vinorine synthase-like (A)                       | BAHD acyltransferase BIA1 {ECO:0000303 PubMed:22956280}; EC=2.3.1.-; Protein ABNORMAL SHOOT 1 {ECO:0000303 PubMed:22956280}; Protein BRASSINOSTEROID INACTIVATOR 1 {ECO:0000303 PubMed:22544867} (At3g26040) | -2.952 |
| Cs1g05930       | K13065 shikimate O-hydroxycinnamoyltransferase [EC:2.3.1.133]   (RefSeq) vinorine synthase-like (A)                       | Salutaridinol 7-O-acetyltransferase {ECO:0000303 PubMed:11404355}; salAT {ECO:0000303 PubMed:11404355}; EC=2.3.1.150 {ECO:0000269 PubMed:11404355, ECO:0000269 PubMed:8537369} (At3g26040)                   | -1.430 |
| Cs2g17520       | K13065 shikimate O-hydroxycinnamoyltransferase [EC:2.3.1.133]   (RefSeq) vinorine synthase-like (A)                       | Salutaridinol 7-O-acetyltransferase {ECO:0000303 PubMed:11404355}; salAT {ECO:0000303 PubMed:11404355}; EC=2.3.1.150 {ECO:0000269 PubMed:11404355, ECO:0000269 PubMed:8537369} (At3g26040)                   | 13.256 |
| Cs3g04840       | K13065 shikimate O-hydroxycinnamoyltransferase [EC:2.3.1.133]   (RefSeq) vinorine synthase-like (A)                       | BAHD acyltransferase At5g47980; EC=2.3.1.- (At3g26040)                                                                                                                                                       | -1.485 |
| Cs3g10450       | K13065 shikimate O-hydroxycinnamoyltransferase [EC:2.3.1.133]   (RefSeq) shikimate O-hydroxycinnamoyltransferase-like (A) | Shikimate O-hydroxycinnamoyltransferase; EC=2.3.1.133; Hydroxycinnamoyl transferase; Hydroxycinnamoyl-Coenzyme A shikimate/quinic hydroxycinnamoyltransferase (At5g48930)                                    | -2.145 |
| Cs3g10460       | K13065 shikimate O-hydroxycinnamoyltransferase [EC:2.3.1.133]   (RefSeq) shikimate O-hydroxycinnamoyltransferase-like (A) | Shikimate O-hydroxycinnamoyltransferase; EC=2.3.1.133; Hydroxycinnamoyl transferase; Hydroxycinnamoyl-Coenzyme A shikimate/quinic hydroxycinnamoyltransferase (At5g48930)                                    | -1.719 |
| Cs3g27120       | K13065 shikimate O-hydroxycinnamoyltransferase [EC:2.3.1.133]   (RefSeq) vinorine synthase-like (A)                       | Vinorine synthase; EC=2.3.1.160 (At3g26040)                                                                                                                                                                  | 7.472  |

|                 |                                                                                                                                |                                                                                                                                                                                                     |        |
|-----------------|--------------------------------------------------------------------------------------------------------------------------------|-----------------------------------------------------------------------------------------------------------------------------------------------------------------------------------------------------|--------|
| Cs4g01910       | K13065 shikimate O-hydroxycinnamoyltransferase [EC:2.3.1.133]   (RefSeq)<br>shikimate O-hydroxycinnamoyltransferase-like (A)   | Shikimate O-hydroxycinnamoyltransferase; EC=2.3.1.133;<br>Hydroxycinnamoyl transferase; Hydroxycinnamoyl-Coenzyme A<br>shikimate/quinic hydroxycinnamoyltransferase (At5g48930)                     | -1.124 |
| Cs4g02380       | K13065 shikimate O-hydroxycinnamoyltransferase [EC:2.3.1.133]   (RefSeq)<br>shikimate O-hydroxycinnamoyltransferase-like (A)   | Shikimate O-hydroxycinnamoyltransferase; EC=2.3.1.133;<br>Hydroxycinnamoyl transferase; Hydroxycinnamoyl-Coenzyme A<br>shikimate/quinic hydroxycinnamoyltransferase (At5g48930)                     | -2.534 |
| Cs5g18930       | K13065 shikimate O-hydroxycinnamoyltransferase [EC:2.3.1.133]   (RefSeq)<br>shikimate O-hydroxycinnamoyltransferase-like (A)   | Shikimate O-hydroxycinnamoyltransferase; EC=2.3.1.133;<br>Hydroxycinnamoyl transferase; Hydroxycinnamoyl-Coenzyme A<br>shikimate/quinic hydroxycinnamoyltransferase (At5g48930)                     | -2.721 |
| Cs6g17150       | K13065 shikimate O-hydroxycinnamoyltransferase [EC:2.3.1.133]   (RefSeq)<br>vinorine synthase-like (A)                         | Salutaridinol 7-O-acetyltransferase {ECO:0000303 PubMed:11404355};<br>salAT {ECO:0000303 PubMed:11404355}; EC=2.3.1.150<br>{ECO:0000269 PubMed:11404355, ECO:0000269 PubMed:8537369}<br>(At3g26040) | 1.407  |
| Cs6g17160       | K13065 shikimate O-hydroxycinnamoyltransferase [EC:2.3.1.133]   (RefSeq)<br>vinorine synthase-like (A)                         | Vinorine synthase; EC=2.3.1.160 (At1g24430)                                                                                                                                                         | 8.040  |
| Cs7g10110       | K13065 shikimate O-hydroxycinnamoyltransferase [EC:2.3.1.133]   (RefSeq)<br>vinorine synthase-like (A)                         | BAHD acyltransferase At5g47980; EC=2.3.1.- (At3g26040)                                                                                                                                              | -1.531 |
| Cs9g08970       | K13065 shikimate O-hydroxycinnamoyltransferase [EC:2.3.1.133]   (RefSeq)<br>salutaridinol 7-O-acetyltransferase-like (A)       | Salutaridinol 7-O-acetyltransferase {ECO:0000303 PubMed:11404355};<br>salAT {ECO:0000303 PubMed:11404355}; EC=2.3.1.150<br>{ECO:0000269 PubMed:11404355, ECO:0000269 PubMed:8537369}<br>(At3g26040) | 3.593  |
| Cs9g19030       | K13065 shikimate O-hydroxycinnamoyltransferase [EC:2.3.1.133]   (RefSeq)<br>vinorine synthase-like (A)                         | BAHD acyltransferase At5g47980; EC=2.3.1.- (At3g26040)                                                                                                                                              | 2.298  |
| orange1.1t02793 | K13065 shikimate O-hydroxycinnamoyltransferase [EC:2.3.1.133]   (RefSeq)<br>shikimate O-hydroxycinnamoyltransferase (A)        | Shikimate O-hydroxycinnamoyltransferase; EC=2.3.1.133;<br>Hydroxycinnamoyl transferase; Hydroxycinnamoyl-Coenzyme A<br>shikimate/quinic hydroxycinnamoyltransferase (At5g48930)                     | -1.013 |
| Cs5g16860       | K13066 caffeic acid 3-O-methyltransferase [EC:2.1.1.68]   (RefSeq)<br>anthranilate N-methyltransferase-like (A)                | Anthranilate N-methyltransferase; RgANMT; EC=2.1.1.111 (At5g54160)                                                                                                                                  | 2.980  |
| Cs5g18010       | K13066 caffeic acid 3-O-methyltransferase [EC:2.1.1.68]   (RefSeq) caffeic<br>acid 3-O-methyltransferase-like (A)              | Caffeic acid 3-O-methyltransferase 1; CAOMT-1; COMT-1; EC=2.1.1.68; S-<br>adenosyl-L-methionine:caffeic acid 3-O-methyltransferase 1 (At5g54160)                                                    | 3.211  |
| Cs5g24930       | K13066 caffeic acid 3-O-methyltransferase [EC:2.1.1.68]   (RefSeq) caffeic<br>acid 3-O-methyltransferase 1-like isoform X1 (A) | Caffeic acid 3-O-methyltransferase 1; CAOMT-1; COMT-1; EC=2.1.1.68; S-<br>adenosyl-L-methionine:caffeic acid 3-O-methyltransferase 1 (At5g54160)                                                    | 1.277  |
| Cs5g24940       | K13066 caffeic acid 3-O-methyltransferase [EC:2.1.1.68]   (RefSeq)<br>anthranilate N-methyltransferase-like isoform X1 (A)     | Anthranilate N-methyltransferase; RgANMT; EC=2.1.1.111 (At5g54160)                                                                                                                                  | 1.034  |
| Cs5g24960       | K13066 caffeic acid 3-O-methyltransferase [EC:2.1.1.68]   (RefSeq)<br>anthranilate N-methyltransferase-like (A)                | Anthranilate N-methyltransferase; RgANMT; EC=2.1.1.111 (At5g54160)                                                                                                                                  | 1.013  |

|                 |                                                                                                                  |                                                                                                                                                                                                                                                      |        |
|-----------------|------------------------------------------------------------------------------------------------------------------|------------------------------------------------------------------------------------------------------------------------------------------------------------------------------------------------------------------------------------------------------|--------|
| orange1.1t02947 | K13066 caffeic acid 3-O-methyltransferase [EC:2.1.1.68]   (RefSeq) anthranilate N-methyltransferase-like (A)     | Anthranilate N-methyltransferase; RgANMT; EC=2.1.1.111 (At5g54160)                                                                                                                                                                                   | -1.956 |
| orange1.1t03686 | K13066 caffeic acid 3-O-methyltransferase [EC:2.1.1.68]   (RefSeq) anthranilate N-methyltransferase-like (A)     | Anthranilate N-methyltransferase; RgANMT; EC=2.1.1.111 (At5g54160)                                                                                                                                                                                   | -1.156 |
| orange1.1t04506 | K13066 caffeic acid 3-O-methyltransferase [EC:2.1.1.68]   (RefSeq) anthranilate N-methyltransferase-like (A)     | Anthranilate N-methyltransferase; RgANMT; EC=2.1.1.111 (At5g54160)                                                                                                                                                                                   | -2.516 |
| orange1.1t05037 | K13066 caffeic acid 3-O-methyltransferase [EC:2.1.1.68]   (RefSeq) caffeic acid 3-O-methyltransferase 1-like (A) | Flavone 3'-O-methyltransferase 1; AtOMT1; EC=2.1.1.42; Acetylserotonin O-methyltransferase OMT1 {ECO:0000305}; EC=2.1.1.4 {ECO:0000269 PubMed:25039887}; Caffeate O-methyltransferase 1; EC=2.1.1.68; Quercetin 3'-O-methyltransferase 1 (At3g53140) | -1.125 |
| novel.2237      | K13066 caffeic acid 3-O-methyltransferase [EC:2.1.1.68]   (RefSeq) anthranilate N-methyltransferase-like (A)     | Anthranilate N-methyltransferase; RgANMT; EC=2.1.1.111 (At5g54160)                                                                                                                                                                                   | -2.887 |
| novel.2253      | K13066 caffeic acid 3-O-methyltransferase [EC:2.1.1.68]   (RefSeq) anthranilate N-methyltransferase-like (A)     | Caffeic acid 3-O-methyltransferase; CAOMT; COMT; EC=2.1.1.68; S-adenosyl-L-methionine:caffeic acid 3-O-methyltransferase (At5g54160)                                                                                                                 | -3.424 |
| novel.2338      | K13066 caffeic acid 3-O-methyltransferase [EC:2.1.1.68]   (RefSeq) anthranilate N-methyltransferase-like (A)     | Caffeic acid 3-O-methyltransferase 1; CAOMT-1; COMT-1; EC=2.1.1.68; S-adenosyl-L-methionine:caffeic acid 3-O-methyltransferase 1 (At5g54160)                                                                                                         | -3.975 |
| novel.2404      | K13066 caffeic acid 3-O-methyltransferase [EC:2.1.1.68]   (RefSeq) anthranilate N-methyltransferase-like (A)     | Caffeic acid 3-O-methyltransferase; CAOMT; COMT; EC=2.1.1.68; S-adenosyl-L-methionine:caffeic acid 3-O-methyltransferase (At5g54160)                                                                                                                 | -2.282 |
| novel.1052      | K13066 caffeic acid 3-O-methyltransferase [EC:2.1.1.68]   (RefSeq) caffeic acid 3-O-methyltransferase-like (A)   | Caffeic acid 3-O-methyltransferase; CAOMT; COMT; EC=2.1.1.68; S-adenosyl-L-methionine:caffeic acid 3-O-methyltransferase (At5g54160)                                                                                                                 | -1.371 |
| novel.895       | K13066 caffeic acid 3-O-methyltransferase [EC:2.1.1.68]   (RefSeq) caffeic acid 3-O-methyltransferase-like (A)   | Caffeic acid 3-O-methyltransferase; CAOMT; COMT; EC=2.1.1.68; S-adenosyl-L-methionine:caffeic acid 3-O-methyltransferase (At5g54160)                                                                                                                 | 3.686  |
| novel.901       | K13066 caffeic acid 3-O-methyltransferase [EC:2.1.1.68]   (RefSeq) anthranilate N-methyltransferase-like (A)     | Caffeic acid 3-O-methyltransferase; CAOMT; COMT; EC=2.1.1.68; S-adenosyl-L-methionine:caffeic acid 3-O-methyltransferase; Flags: Fragment (At5g54160)                                                                                                | -4.629 |
| Cs2g10060       | K22395 cinnamyl-alcohol dehydrogenase [EC:1.1.1.195]   (RefSeq) flavin-dependent oxidoreductase FOX2 (A)         | Berberine bridge enzyme-like 22 {ECO:0000303 PubMed:26037923}; AtBBE-like 22 {ECO:0000303 PubMed:26037923}; EC=1.1.1.- {ECO:0000250 UniProtKB:O64743}; Flags: Precursor (At4g20860)                                                                  | 1.304  |
| Cs2g10120       | K22395 cinnamyl-alcohol dehydrogenase [EC:1.1.1.195]   (RefSeq) flavin-dependent oxidoreductase FOX2-like (A)    | Cannabidiolic acid synthase; EC=1.21.3.8; CBDA synthase; Flags: Precursor (At4g20820)                                                                                                                                                                | 2.392  |
| Cs2g10200       | K22395 cinnamyl-alcohol dehydrogenase [EC:1.1.1.195]   (RefSeq) flavin-dependent oxidoreductase FOX2-like (A)    | Cannabidiolic acid synthase; EC=1.21.3.8; CBDA synthase; Flags: Precursor (At5g44440)                                                                                                                                                                | 6.074  |
| Cs2g10230       | K22395 cinnamyl-alcohol dehydrogenase [EC:1.1.1.195]   (RefSeq) flavin-dependent oxidoreductase FOX2-like (A)    | Berberine bridge enzyme-like 14 {ECO:0000303 PubMed:26037923}; AtBBE-like 14 {ECO:0000303 PubMed:26037923}; EC=1.1.1.- {ECO:0000250 UniProtKB:O64743}; Flags: Precursor (At1g34570)                                                                  | 1.569  |

|                                                                        |                                                                                                                                         |                                                                                                                                                                                     |        |
|------------------------------------------------------------------------|-----------------------------------------------------------------------------------------------------------------------------------------|-------------------------------------------------------------------------------------------------------------------------------------------------------------------------------------|--------|
| Cs3g10950                                                              | K22395 cinnamyl-alcohol dehydrogenase [EC:1.1.1.195]   (RefSeq) flavin-dependent oxidoreductase FOX2 (A)                                | Berberine bridge enzyme-like 8 {ECO:0000303 PubMed:26037923}; AtBBE-like 8 {ECO:0000303 PubMed:26037923}; EC=1.1.1.- {ECO:0000250 UniProtKB:O64743}; Flags: Precursor (At1g30700)   | -1.024 |
| Cs5g18590                                                              | K22395 cinnamyl-alcohol dehydrogenase [EC:1.1.1.195]   (RefSeq) flavin-dependent oxidoreductase FOX2-like (A)                           | Reticuline oxidase; EC=1.21.3.3; Berberine bridge-forming enzyme; BBE; Tetrahydropprotoberberine synthase; Flags: Precursor (At5g44380)                                             | 6.963  |
| orange1.1t01951                                                        | K22395 cinnamyl-alcohol dehydrogenase [EC:1.1.1.195]   (RefSeq) flavin-dependent oxidoreductase FOX2-like (A)                           | Berberine bridge enzyme-like 18 {ECO:0000303 PubMed:26037923}; AtBBE-like 18 {ECO:0000303 PubMed:26037923}; EC=1.1.1.- {ECO:0000250 UniProtKB:O64743}; Flags: Precursor (At4g20820) | -1.397 |
| orange1.1t05417                                                        | K22395 cinnamyl-alcohol dehydrogenase [EC:1.1.1.195]   (RefSeq) flavin-dependent oxidoreductase FOX2-like (A)                           | Berberine bridge enzyme-like 18 {ECO:0000303 PubMed:26037923}; AtBBE-like 18 {ECO:0000303 PubMed:26037923}; EC=1.1.1.- {ECO:0000250 UniProtKB:O64743}; Flags: Precursor (At4g20820) | -1.102 |
| novel.1498                                                             | K22395 cinnamyl-alcohol dehydrogenase [EC:1.1.1.195]   (RefSeq) flavin-dependent oxidoreductase FOX2 (A)                                | Cannabidiolic acid synthase; EC=1.21.3.8; CBDA synthase; Flags: Precursor (At4g20860)                                                                                               | 4.003  |
| Cs1g09360                                                              | K23260 scopoletin glucosyltransferase [EC:2.4.1.128]   (RefSeq) scopoletin glucosyltransferase-like (A)                                 | UDP-glycosyltransferase 92A1; EC=2.4.1.- (At5g12890)                                                                                                                                | -2.876 |
| Cs5g24640                                                              | K23260 scopoletin glucosyltransferase [EC:2.4.1.128]   (RefSeq) scopoletin glucosyltransferase-like (A)                                 | UDP-glycosyltransferase 76F1; EC=2.4.1.- (At3g55700)                                                                                                                                | 2.191  |
| orange1.1t03150                                                        | K23260 scopoletin glucosyltransferase [EC:2.4.1.128]   (RefSeq) scopoletin glucosyltransferase-like (A)                                 | UDP-glycosyltransferase 92A1; EC=2.4.1.- (At5g12890)                                                                                                                                | -1.583 |
| orange1.1t03151                                                        | K23260 scopoletin glucosyltransferase [EC:2.4.1.128]   (RefSeq) scopoletin glucosyltransferase-like (A)                                 | UDP-glycosyltransferase 92A1; EC=2.4.1.- (At5g12890)                                                                                                                                | -1.376 |
| <b><i>Isoquinoline alkaloid biosynthesis (ko00950, P = 0.0051)</i></b> |                                                                                                                                         |                                                                                                                                                                                     |        |
| Cs5g06000                                                              | K00276 primary-amine oxidase [EC:1.4.3.21]   (RefSeq) copper methylamine oxidase-like (A)                                               | Primary amine oxidase; EC=1.4.3.21 {ECO:0000250 UniProtKB:P12807}; Amine oxidase [copper-containing]; Flags: Precursor (At2g42490)                                                  | 1.248  |
| Cs5g09470                                                              | K00276 primary-amine oxidase [EC:1.4.3.21]   (RefSeq) primary amine oxidase-like (A)                                                    | Primary amine oxidase; EC=1.4.3.21 {ECO:0000250 UniProtKB:P46883}; Amine oxidase [copper-containing]; Flags: Precursor (At4g12290)                                                  | 1.900  |
| Cs9g06770                                                              | K00276 primary-amine oxidase [EC:1.4.3.21]   (RefSeq) primary amine oxidase-like (A)                                                    | Primary amine oxidase; EC=1.4.3.21 {ECO:0000250 UniProtKB:P46883}; Amine oxidase [copper-containing]; Flags: Precursor; Fragment (At1g31700)                                        | 2.469  |
| Cs2g23850                                                              | K00815 tyrosine aminotransferase [EC:2.6.1.5]   (RefSeq) probable aminotransferase TAT2 (A)                                             | Probable aminotransferase TAT2; EC=2.6.1.-; Tyrosine aminotransferase 2 (At5g53970)                                                                                                 | 1.040  |
| Cs2g23860                                                              | K00815 tyrosine aminotransferase [EC:2.6.1.5]   (RefSeq) probable aminotransferase TAT2 (A)                                             | Probable aminotransferase TAT2; EC=2.6.1.-; Tyrosine aminotransferase 2 (At5g53970)                                                                                                 | 2.234  |
| Cs2g22660                                                              | K01593 aromatic-L-amino-acid/L-tryptophan decarboxylase [EC:4.1.1.28 4.1.1.105]   (RefSeq) aromatic-L-amino-acid decarboxylase-like (A) | Aromatic-L-amino-acid decarboxylase; AADC; EC=4.1.1.28; DOPA decarboxylase; Tryptophan decarboxylase (At2g20340)                                                                    | 2.272  |

|                                                                                            |                                                                                                                                   |                                                                                                                                                                       |        |
|--------------------------------------------------------------------------------------------|-----------------------------------------------------------------------------------------------------------------------------------|-----------------------------------------------------------------------------------------------------------------------------------------------------------------------|--------|
| Cs2g30610                                                                                  | K01593 aromatic-L-amino-acid/L-tryptophan decarboxylase [EC:4.1.1.28 4.1.1.105]   (RefSeq) tyrosine/DOPA decarboxylase 1-like (A) | Tyrosine/DOPA decarboxylase 2; Includes: DOPA decarboxylase; DDC; EC=4.1.1.28; Includes: Tyrosine decarboxylase; EC=4.1.1.25 (At2g20340)                              | -2.103 |
| Cs3g22910                                                                                  | K01593 aromatic-L-amino-acid/L-tryptophan decarboxylase [EC:4.1.1.28 4.1.1.105]   (RefSeq) tyrosine/DOPA decarboxylase 1-like (A) | Tyrosine/DOPA decarboxylase 2; Includes: DOPA decarboxylase; DDC; EC=4.1.1.28; Includes: Tyrosine decarboxylase; EC=4.1.1.25 (At2g20340)                              | -1.551 |
| Cs7g16560                                                                                  | K01593 aromatic-L-amino-acid/L-tryptophan decarboxylase [EC:4.1.1.28 4.1.1.105]   (RefSeq) tyrosine/DOPA decarboxylase 1-like (A) | Tyrosine/DOPA decarboxylase 5; Includes: DOPA decarboxylase; DDC; EC=4.1.1.28; Includes: Tyrosine decarboxylase; EC=4.1.1.25 (At4g28680)                              | -1.760 |
| Cs7g16600                                                                                  | K01593 aromatic-L-amino-acid/L-tryptophan decarboxylase [EC:4.1.1.28 4.1.1.105]   (RefSeq) tyrosine/DOPA decarboxylase 1-like (A) | Tyrosine/DOPA decarboxylase 2; Includes: DOPA decarboxylase; DDC; EC=4.1.1.28; Includes: Tyrosine decarboxylase; EC=4.1.1.25 (At2g20340)                              | -1.695 |
| Cs4g16050                                                                                  | K14454 aspartate aminotransferase, cytoplasmic [EC:2.6.1.1]   (RefSeq) aspartate aminotransferase, cytoplasmic (A)                | Aspartate aminotransferase, cytoplasmic; EC=2.6.1.1; Transaminase A (At5g11520)                                                                                       | -1.328 |
| Cs2g15280                                                                                  | K14455 aspartate aminotransferase, mitochondrial [EC:2.6.1.1]   (RefSeq) aspartate aminotransferase, mitochondrial-like (A)       | Aspartate aminotransferase, mitochondrial; EC=2.6.1.1; Transaminase A; Flags: Precursor (At2g30970)                                                                   | -1.142 |
| <b><i>Tropane, piperidine and pyridine alkaloid biosynthesis (ko00960, P = 0.0292)</i></b> |                                                                                                                                   |                                                                                                                                                                       |        |
| Cs5g06000                                                                                  | K00276 primary-amine oxidase [EC:1.4.3.21]   (RefSeq) copper methylamine oxidase-like (A)                                         | Primary amine oxidase; EC=1.4.3.21 {ECO:0000250 UniProtKB:P12807}; Amine oxidase [copper-containing]; Flags: Precursor (At2g42490)                                    | 1.248  |
| Cs5g09470                                                                                  | K00276 primary-amine oxidase [EC:1.4.3.21]   (RefSeq) primary amine oxidase-like (A)                                              | Primary amine oxidase; EC=1.4.3.21 {ECO:0000250 UniProtKB:P46883}; Amine oxidase [copper-containing]; Flags: Precursor (At4g12290)                                    | 1.900  |
| Cs9g06770                                                                                  | K00276 primary-amine oxidase [EC:1.4.3.21]   (RefSeq) primary amine oxidase-like (A)                                              | Primary amine oxidase; EC=1.4.3.21 {ECO:0000250 UniProtKB:P46883}; Amine oxidase [copper-containing]; Flags: Precursor; Fragment (At1g31700)                          | 2.469  |
| Cs2g23850                                                                                  | K00815 tyrosine aminotransferase [EC:2.6.1.5]   (RefSeq) probable aminotransferase TAT2 (A)                                       | Probable aminotransferase TAT2; EC=2.6.1.-; Tyrosine aminotransferase 2 (At5g53970)                                                                                   | 1.040  |
| Cs2g23860                                                                                  | K00815 tyrosine aminotransferase [EC:2.6.1.5]   (RefSeq) probable aminotransferase TAT2 (A)                                       | Probable aminotransferase TAT2; EC=2.6.1.-; Tyrosine aminotransferase 2 (At5g53970)                                                                                   | 2.234  |
| Cs6g06610                                                                                  | K08081 tropinone reductase I [EC:1.1.1.206]   (RefSeq) tropinone reductase homolog (A)                                            | Tropinone reductase homolog; EC=1.1.1.-; P29X (At2g29290)                                                                                                             | 1.100  |
| Cs8g19105                                                                                  | K08081 tropinone reductase I [EC:1.1.1.206]   (RefSeq) tropinone reductase homolog At2g29170-like (A)                             | Tropinone reductase homolog At2g29170 {ECO:0000305}; EC=1.1.1.- {ECO:0000305} (At2g29170)                                                                             | -3.006 |
| orange1.1t02874                                                                            | K08081 tropinone reductase I [EC:1.1.1.206]   (RefSeq) tropinone reductase homolog At2g29170-like (A)                             | Senescence-associated protein 13 {ECO:0000303 PubMed:9617813}; Tropinone reductase homolog SAG13 {ECO:0000250 UniProtKB:P50162}; EC=1.1.1.- {ECO:0000305} (At2g29350) | -1.365 |
| orange1.1t03034                                                                            | K08081 tropinone reductase I [EC:1.1.1.206]   (RefSeq) tropinone reductase homolog (A)                                            | Tropinone reductase homolog; EC=1.1.1.-; P29X (At5g06060)                                                                                                             | 2.709  |
| orange1.1t03035                                                                            | K08081 tropinone reductase I [EC:1.1.1.206]   (RefSeq) tropinone reductase homolog (A)                                            | Tropinone reductase homolog; EC=1.1.1.-; P29X (At5g06060)                                                                                                             | 2.759  |

|                                                                    |                                                                                                                             |                                                                                                                                                                                                                                                      |        |
|--------------------------------------------------------------------|-----------------------------------------------------------------------------------------------------------------------------|------------------------------------------------------------------------------------------------------------------------------------------------------------------------------------------------------------------------------------------------------|--------|
| Cs4g16050                                                          | K14454 aspartate aminotransferase, cytoplasmic [EC:2.6.1.1]   (RefSeq) aspartate aminotransferase, cytoplasmic (A)          | Aspartate aminotransferase, cytoplasmic; EC=2.6.1.1; Transaminase A (At5g11520)                                                                                                                                                                      | -1.328 |
| Cs2g15280                                                          | K14455 aspartate aminotransferase, mitochondrial [EC:2.6.1.1]   (RefSeq) aspartate aminotransferase, mitochondrial-like (A) | Aspartate aminotransferase, mitochondrial; EC=2.6.1.1; Transaminase A; Flags: Precursor (At2g30970)                                                                                                                                                  | -1.142 |
|                                                                    |                                                                                                                             |                                                                                                                                                                                                                                                      |        |
| <b><i>Acridone alkaloid biosynthesis (ko01058, P = 0.1516)</i></b> |                                                                                                                             |                                                                                                                                                                                                                                                      |        |
| orange1.1t00577                                                    | K12643 anthranilate N-methyltransferase [EC:2.1.1.111]   (RefSeq) anthranilate N-methyltransferase-like (A)                 | Anthranilate N-methyltransferase; RgANMT; EC=2.1.1.111 (At5g54160)                                                                                                                                                                                   | 1.433  |
| orange1.1t00578                                                    | K12643 anthranilate N-methyltransferase [EC:2.1.1.111]   (RefSeq) anthranilate N-methyltransferase-like (A)                 | Anthranilate N-methyltransferase; RgANMT; EC=2.1.1.111 (At5g54160)                                                                                                                                                                                   | 3.440  |
|                                                                    |                                                                                                                             |                                                                                                                                                                                                                                                      |        |
| <b><i>Lignin biosynthetic process (GO:0009809, P = 0.2773)</i></b> |                                                                                                                             |                                                                                                                                                                                                                                                      |        |
| Cs1g19890                                                          | K00430 peroxidase [EC:1.11.1.7]   (RefSeq) peroxidase 17 (A)                                                                | Peroxidase 17; Atperox P17; EC=1.11.1.7; ATP25a; Flags: Precursor (At2g22420)                                                                                                                                                                        | -1.915 |
| Cs5g18010                                                          | K13066 caffeic acid 3-O-methyltransferase [EC:2.1.1.68]   (RefSeq) caffeic acid 3-O-methyltransferase-like (A)              | Caffeic acid 3-O-methyltransferase 1; CAOMT-1; COMT-1; EC=2.1.1.68; S-adenosyl-L-methionine:caffeic acid 3-O-methyltransferase 1 (At5g54160)                                                                                                         | 3.211  |
| Cs3g01270                                                          | K09753 cinnamoyl-CoA reductase [EC:1.2.1.44]   (RefSeq) cinnamoyl-CoA reductase 1-like (A)                                  | Cinnamoyl-CoA reductase 1 {ECO:0000305}; OsCCR1 {ECO:0000303 PubMed:16380417}; EC=1.2.1.44 {ECO:0000269 PubMed:16380417} (At2g02400)                                                                                                                 | -1.007 |
| novel.1052                                                         | K13066 caffeic acid 3-O-methyltransferase [EC:2.1.1.68]   (RefSeq) caffeic acid 3-O-methyltransferase-like (A)              | Caffeic acid 3-O-methyltransferase; CAOMT; COMT; EC=2.1.1.68; S-adenosyl-L-methionine:caffeic acid 3-O-methyltransferase (At5g54160)                                                                                                                 | -1.371 |
| Cs4g13440                                                          | K00588 caffeoyl-CoA O-methyltransferase [EC:2.1.1.104]   (RefSeq) probable caffeoyl-CoA O-methyltransferase At4g26220 (A)   | Probable caffeoyl-CoA O-methyltransferase At4g26220; EC=2.1.1.104; Trans-caffeoyl-CoA 3-O-methyltransferase; CCoAMT; CCoAOMT (At4g26220)                                                                                                             | -1.712 |
| Cs1g24640                                                          | K00430 peroxidase [EC:1.11.1.7]   (RefSeq) peroxidase 72 (A)                                                                | Peroxidase 72; Atperox P72; EC=1.11.1.7; ATP6a; PRXR8; Flags: Precursor (At5g66390)                                                                                                                                                                  | -2.627 |
| orange1.1t05037                                                    | K13066 caffeic acid 3-O-methyltransferase [EC:2.1.1.68]   (RefSeq) caffeic acid 3-O-methyltransferase 1-like (A)            | Flavone 3'-O-methyltransferase 1; AtOMT1; EC=2.1.1.42; Acetylserotonin O-methyltransferase OMT1 {ECO:0000305}; EC=2.1.1.4 {ECO:0000269 PubMed:25039887}; Caffeate O-methyltransferase 1; EC=2.1.1.68; Quercetin 3'-O-methyltransferase 1 (At3g53140) | -1.125 |
| novel.901                                                          | K13066 caffeic acid 3-O-methyltransferase [EC:2.1.1.68]   (RefSeq) anthranilate N-methyltransferase-like (A)                | Caffeic acid 3-O-methyltransferase; CAOMT; COMT; EC=2.1.1.68; S-adenosyl-L-methionine:caffeic acid 3-O-methyltransferase; Flags: Fragment (At5g54160)                                                                                                | -4.629 |
| novel.895                                                          | K13066 caffeic acid 3-O-methyltransferase [EC:2.1.1.68]   (RefSeq) caffeic acid 3-O-methyltransferase-like (A)              | Caffeic acid 3-O-methyltransferase; CAOMT; COMT; EC=2.1.1.68; S-adenosyl-L-methionine:caffeic acid 3-O-methyltransferase (At5g54160)                                                                                                                 | 3.686  |

|                                                                                     |                                                                                                                             |                                                                                                                                                                                                                                                                                                        |        |
|-------------------------------------------------------------------------------------|-----------------------------------------------------------------------------------------------------------------------------|--------------------------------------------------------------------------------------------------------------------------------------------------------------------------------------------------------------------------------------------------------------------------------------------------------|--------|
| novel.2404                                                                          | K13066 caffeic acid 3-O-methyltransferase [EC:2.1.1.68]   (RefSeq) anthranilate N-methyltransferase-like (A)                | Caffeic acid 3-O-methyltransferase; CAOMT; COMT; EC=2.1.1.68; S-adenosyl-L-methionine:caffeic acid 3-O-methyltransferase (At5g54160)                                                                                                                                                                   | -2.282 |
| Cs5g24930                                                                           | K13066 caffeic acid 3-O-methyltransferase [EC:2.1.1.68]   (RefSeq) caffeic acid 3-O-methyltransferase 1-like isoform X1 (A) | Caffeic acid 3-O-methyltransferase 1; CAOMT-1; COMT-1; EC=2.1.1.68; S-adenosyl-L-methionine:caffeic acid 3-O-methyltransferase 1 (At5g54160)                                                                                                                                                           | 1.277  |
| novel.2338                                                                          | K13066 caffeic acid 3-O-methyltransferase [EC:2.1.1.68]   (RefSeq) anthranilate N-methyltransferase-like (A)                | Caffeic acid 3-O-methyltransferase 1; CAOMT-1; COMT-1; EC=2.1.1.68; S-adenosyl-L-methionine:caffeic acid 3-O-methyltransferase 1 (At5g54160)                                                                                                                                                           | -3.975 |
| novel.2253                                                                          | K13066 caffeic acid 3-O-methyltransferase [EC:2.1.1.68]   (RefSeq) anthranilate N-methyltransferase-like (A)                | Caffeic acid 3-O-methyltransferase; CAOMT; COMT; EC=2.1.1.68; S-adenosyl-L-methionine:caffeic acid 3-O-methyltransferase (At5g54160)                                                                                                                                                                   | -3.424 |
| Cs6g04150                                                                           | K00588 caffeoyl-CoA O-methyltransferase [EC:2.1.1.104]   (RefSeq) caffeoyl-CoA O-methyltransferase-like (A)                 | Caffeoyl-CoA O-methyltransferase; EC=2.1.1.104; Trans-caffeoyl-CoA 3-O-methyltransferase; CCoAMT; CCoAOMT (At4g34050)                                                                                                                                                                                  | -1.272 |
| orange1.1t02754                                                                     | K09753 cinnamoyl-CoA reductase [EC:1.2.1.44]   (RefSeq) cinnamoyl-CoA reductase 1-like (A)                                  | Cinnamoyl-CoA reductase 1; AtCCR1; EC=1.2.1.44; Protein IRREGULAR XYLEM 4 (At1g15950)                                                                                                                                                                                                                  | -1.095 |
| Cs1g22450                                                                           | K00588 caffeoyl-CoA O-methyltransferase [EC:2.1.1.104]   (RefSeq) caffeoyl-CoA O-methyltransferase-like (A)                 | Caffeoyl-CoA O-methyltransferase; EC=2.1.1.104; Trans-caffeoyl-CoA 3-O-methyltransferase; CCoAMT; CCoAOMT (At4g34050)                                                                                                                                                                                  | -1.416 |
| novel.242                                                                           | K00430 peroxidase [EC:1.11.1.7]   (RefSeq) peroxidase P7-like (A)                                                           | Peroxidase 52; Atperox P52; EC=1.11.1.7; ATP49; Flags: Precursor (At5g05340)                                                                                                                                                                                                                           | -2.455 |
| Cs6g06880                                                                           | K05909 laccase [EC:1.10.3.2]   (RefSeq) laccase-17-like (A)                                                                 | Laccase-17; EC=1.10.3.2; Benzenediol:oxygen oxidoreductase 17; Diphenol oxidase 17; AltName: Full=Urishiol oxidase 17; Flags: Precursor (At5g60020)                                                                                                                                                    | -1.866 |
| Cs3g13090                                                                           | K09753 cinnamoyl-CoA reductase [EC:1.2.1.44]   (RefSeq) cinnamoyl-CoA reductase 1-like (A)                                  | Cinnamoyl-CoA reductase 1 {ECO:0000305}; OsCCR1 {ECO:0000303 PubMed:16380417}; EC=1.2.1.44 {ECO:0000269 PubMed:16380417} (At2g33590)                                                                                                                                                                   | 1.330  |
| <b><i>Lignin catabolic process (GO:0046274, P = 0.7389)</i></b>                     |                                                                                                                             |                                                                                                                                                                                                                                                                                                        |        |
| orange1.1t00518                                                                     | K05909 laccase [EC:1.10.3.2]   (RefSeq) laccase-6 (A)                                                                       | Laccase-6; EC=1.10.3.2; Benzenediol:oxygen oxidoreductase 6; Diphenol oxidase 6; Urishiol oxidase 6; Flags: Precursor (At2g46570)                                                                                                                                                                      | -2.097 |
| Cs6g06880                                                                           | K05909 laccase [EC:1.10.3.2]   (RefSeq) laccase-17-like (A)                                                                 | Laccase-17; EC=1.10.3.2; Benzenediol:oxygen oxidoreductase 17; Diphenol oxidase 17; AltName: Full=Urishiol oxidase 17; Flags: Precursor (At5g60020)                                                                                                                                                    | -1.866 |
| <b><i>Phenol-containing compound metabolic process (GO:0018958, P = 0.0410)</i></b> |                                                                                                                             |                                                                                                                                                                                                                                                                                                        |        |
| Cs5g28720                                                                           | K24028 salicylic acid 3-hydroxylase [EC:1.14.11.-]   (RefSeq) protein DMR6-LIKE OXYGENASE 2-like (A)                        | Protein DMR6-LIKE OXYGENASE 1 {ECO:0000303 PubMed:25376907}; EC=1.14.11.- {ECO:0000255 PROSITE-ProRule:PRU00805}; 2-oxoglutarate (2OG)-Fe(II) oxygenase-like protein DLO1 {ECO:0000303 PubMed:25376907}; rotein SENESCENCE-ASSOCIATED GENE 108 {ECO:0000303 PubMed:23959884}; Salicylate 3-hydroxylase | 4.401  |

|           |                                                                                                                            |                                                                                                                                                                                                                                                                                                                                                                                                                                                                                                                                                                  |        |
|-----------|----------------------------------------------------------------------------------------------------------------------------|------------------------------------------------------------------------------------------------------------------------------------------------------------------------------------------------------------------------------------------------------------------------------------------------------------------------------------------------------------------------------------------------------------------------------------------------------------------------------------------------------------------------------------------------------------------|--------|
|           |                                                                                                                            | DLO1 {ECO:0000303 PubMed:23959884}; S3H DLO1 {ECO:0000303 PubMed:23959884}; SA 3-hydroxylase DLO1 {ECO:0000303 PubMed:23959884}; Salicylic acid 3-hydroxylase DLO1 {ECO:0000303 PubMed:23959884}; EC=1.14.13.- {ECO:0000269 PubMed:23959884} (At3g19000)                                                                                                                                                                                                                                                                                                         |        |
| novel.796 | --                                                                                                                         | Dirigent protein 5; Short=AtDIR5; Flags: Precursor (At1g64160)                                                                                                                                                                                                                                                                                                                                                                                                                                                                                                   | 9.104  |
| Cs5g28710 | K24028 salicylic acid 3-hydroxylase [EC:1.14.11.-]   (RefSeq) protein DMR6-LIKE OXYGENASE 2-like (A)                       | Protein DMR6-LIKE OXYGENASE 1 {ECO:0000303 PubMed:25376907}; EC=1.14.11.- {ECO:0000255 PROSITE-ProRule:PRU00805}; 2-oxoglutarate (2OG)-Fe(II) oxygenase-like protein DLO1 {ECO:0000303 PubMed:25376907}; Protein SENESCENCE-ASSOCIATED GENE 108 {ECO:0000303 PubMed:23959884}; Salicylate 3-hydroxylase DLO1 {ECO:0000303 PubMed:23959884}; S3H DLO1 {ECO:0000303 PubMed:23959884}; SA 3-hydroxylase DLO1 {ECO:0000303 PubMed:23959884}; Salicylic acid 3-hydroxylase DLO1 {ECO:0000303 PubMed:23959884}; EC=1.14.13.- {ECO:0000269 PubMed:23959884} (At3g19000) | -2.993 |
| Cs5g24680 | K20547 basic endochitinase B [EC:3.2.1.14]   (RefSeq) basic endochitinase (A)                                              | Chitinase-like protein 1; AtCTL1; Protein ANION ALTERED ROOT MORPHOLOGY; Protein ECTOPIC DEPOSITION OF LIGNIN IN PITH 1; Protein ECTOPIC ROOT HAIR 2; Protein POM-POM1; Protein SENSITIVE TO HOT TEMPERATURES 2; Flags: Precursor (At1g05850)                                                                                                                                                                                                                                                                                                                    | -1.617 |
| Cs5g28750 | K24028 salicylic acid 3-hydroxylase [EC:1.14.11.-]   (RefSeq) protein DOWNY MILDEW RESISTANCE 6 (A)                        | Protein DMR6-LIKE OXYGENASE 1 {ECO:0000303 PubMed:25376907}; EC=1.14.11.- {ECO:0000255 PROSITE-ProRule:PRU00805}; 2-oxoglutarate (2OG)-Fe(II) oxygenase-like protein DLO1 {ECO:0000303 PubMed:25376907}; Protein SENESCENCE-ASSOCIATED GENE 108 {ECO:0000303 PubMed:23959884}; Salicylate 3-hydroxylase DLO1 {ECO:0000303 PubMed:23959884}; S3H DLO1 {ECO:0000303 PubMed:23959884}; SA 3-hydroxylase DLO1 {ECO:0000303 PubMed:23959884}; Salicylic acid 3-hydroxylase DLO1 {ECO:0000303 PubMed:23959884}; EC=1.14.13.- {ECO:0000269 PubMed:23959884} (At3g19000) | 4.442  |
| Cs5g21220 | K13691 pathogen-inducible salicylic acid glucosyltransferase [EC:2.4.1.-]   (RefSeq) UDP-glycosyltransferase 74F2-like (A) | UDP-glycosyltransferase 74F2; EC=2.4.1.-; AtSGT1; Salicylic acid glucosyltransferase 1 (At2g43820)                                                                                                                                                                                                                                                                                                                                                                                                                                                               | -2.142 |
| novel.306 | K13691 pathogen-inducible salicylic acid glucosyltransferase [EC:2.4.1.-]   (RefSeq) UDP-glycosyltransferase 74G1-like (A) | UDP-glycosyltransferase 74F2; EC=2.4.1.-; AtSGT1; Salicylic acid glucosyltransferase 1 (At2g43820)                                                                                                                                                                                                                                                                                                                                                                                                                                                               | 1.729  |
| Cs2g18240 | K13691 pathogen-inducible salicylic acid glucosyltransferase [EC:2.4.1.-]   (RefSeq) UDP-glycosyltransferase 74G1-like (A) | UDP-glycosyltransferase 74F2; EC=2.4.1.-; AtSGT1; Salicylic acid glucosyltransferase 1 (At2g43820)                                                                                                                                                                                                                                                                                                                                                                                                                                                               | -1.269 |

|            |                                                                                                                            |                                                                                                                                                                                                                                                                                                                                                                                                                                                                                                                                                                  |        |
|------------|----------------------------------------------------------------------------------------------------------------------------|------------------------------------------------------------------------------------------------------------------------------------------------------------------------------------------------------------------------------------------------------------------------------------------------------------------------------------------------------------------------------------------------------------------------------------------------------------------------------------------------------------------------------------------------------------------|--------|
| Cs2g18300  | K13691 pathogen-inducible salicylic acid glucosyltransferase [EC:2.4.1.-]   (RefSeq) UDP-glycosyltransferase 74E2-like (A) | (At2g43820)                                                                                                                                                                                                                                                                                                                                                                                                                                                                                                                                                      | 1.921  |
| Cs5g28780  | K24028 salicylic acid 3-hydroxylase [EC:1.14.11.-]   (RefSeq) protein DMR6-LIKE OXYGENASE 2-like (A)                       | Protein DMR6-LIKE OXYGENASE 2 {ECO:0000303 PubMed:25376907}; EC=1.14.11.- {ECO:0000255 PROSITE-ProRule:PRU00805}; 2-oxoglutarate (2OG)-Fe(II) oxygenase-like protein DLO2 {ECO:0000303 PubMed:25376907}; Salicylate 3-hydroxylase DLO2 {ECO:0000305}; S3H DLO2 {ECO:0000305}; SA 3-hydroxylase DLO2 {ECO:0000305}; Salicylic acid 3-hydroxylase DLO2 {ECO:0000305}; EC=1.14.13.- {ECO:0000250 UniProtKB:Q9ZSA8} (At3g19000)                                                                                                                                      | -1.274 |
| Cs5g18330  | K01381 saccharopepsin [EC:3.4.23.25]   (RefSeq) aspartic proteinase CDR1-like (A)                                          | Aspartic proteinase CDR1; EC=3.4.23.-; Protein CONSTITUTIVE DISEASE RESISTANCE 1; Flags: Precursor (At1g64830)                                                                                                                                                                                                                                                                                                                                                                                                                                                   | -7.269 |
| Cs5g21200  | K13691 pathogen-inducible salicylic acid glucosyltransferase [EC:2.4.1.-]   (RefSeq) UDP-glycosyltransferase 74F2-like (A) | UDP-glycosyltransferase 74F2; EC=2.4.1.-; AtSGT1; Salicylic acid glucosyltransferase 1 (At2g43820)                                                                                                                                                                                                                                                                                                                                                                                                                                                               | -1.666 |
| Cs5g18300  | K01381 saccharopepsin [EC:3.4.23.25]   (RefSeq) aspartic proteinase CDR1-like (A)                                          | Aspartic proteinase CDR1; EC=3.4.23.-; Protein CONSTITUTIVE DISEASE RESISTANCE 1; Flags: Precursor (At1g64830)                                                                                                                                                                                                                                                                                                                                                                                                                                                   | -2.890 |
| novel.1617 | --                                                                                                                         | Protein GRIM REAPER {ECO:0000303 PubMed:19279211}; Stigma-specific STIG1-like protein GRI {ECO:0000303 PubMed:19279211}; Contains: GRIP {ECO:0000303 PubMed:25398910}; Flags: Precursor (At1g53130)                                                                                                                                                                                                                                                                                                                                                              | -2.523 |
| Cs9g14500  | K24028 salicylic acid 3-hydroxylase [EC:1.14.11.-]   (RefSeq) protein DMR6-LIKE OXYGENASE 2-like (A)                       | Protein DMR6-LIKE OXYGENASE 2 {ECO:0000303 PubMed:25376907}; EC=1.14.11.- {ECO:0000255 PROSITE-ProRule:PRU00805}; 2-oxoglutarate (2OG)-Fe(II) oxygenase-like protein DLO2 {ECO:0000303 PubMed:25376907}; Salicylate 3-hydroxylase DLO2 {ECO:0000305}; S3H DLO2 {ECO:0000305}; SA 3-hydroxylase DLO2 {ECO:0000305}; Salicylic acid 3-hydroxylase DLO2 {ECO:0000305}; EC=1.14.13.- {ECO:0000250 UniProtKB:Q9ZSA8} (At4g10490)                                                                                                                                      | 1.351  |
| Cs1g12310  | K24028 salicylic acid 3-hydroxylase [EC:1.14.11.-]   (RefSeq) protein DMR6-LIKE OXYGENASE 2-like (A)                       | Protein DMR6-LIKE OXYGENASE 1 {ECO:0000303 PubMed:25376907}; EC=1.14.11.- {ECO:0000255 PROSITE-ProRule:PRU00805}; 2-oxoglutarate (2OG)-Fe(II) oxygenase-like protein DLO1 {ECO:0000303 PubMed:25376907}; Protein SENESCENCE-ASSOCIATED GENE 108 {ECO:0000303 PubMed:23959884}; Salicylate 3-hydroxylase DLO1 {ECO:0000303 PubMed:23959884}; S3H DLO1 {ECO:0000303 PubMed:23959884}; SA 3-hydroxylase DLO1 {ECO:0000303 PubMed:23959884}; Salicylic acid 3-hydroxylase DLO1 {ECO:0000303 PubMed:23959884}; EC=1.14.13.- {ECO:0000269 PubMed:23959884} (At4g10500) | -1.942 |
|            |                                                                                                                            |                                                                                                                                                                                                                                                                                                                                                                                                                                                                                                                                                                  |        |

| Index                                                              | Compounds                                       |  | Log <sub>2</sub> (FC) |
|--------------------------------------------------------------------|-------------------------------------------------|--|-----------------------|
| <i>Biosynthesis of secondary metabolites (ko01110, P = 0.3272)</i> |                                                 |  |                       |
| MWSmce119                                                          | L-Arginine                                      |  | -2.069                |
| mws0671                                                            | L-Homoserine                                    |  | 5.012                 |
| Lmtn004049                                                         | Abscisic acid                                   |  | -1.969                |
| pme0075                                                            | N-Acetyl-L-glutamic acid                        |  | -1.296                |
| pme0008                                                            | L-Citrulline                                    |  | -1.032                |
| Hmln002806                                                         | 5-O-Caffeoylshikimic acid                       |  | 1.027                 |
| pme3311                                                            | D-Fructose-1,6-biphosphate                      |  | 1.177                 |
| mws2125                                                            | Phosphoenolpyruvate                             |  | 2.249                 |
| pme0220                                                            | Methyl jasmonate                                |  | 1.833                 |
| MWS5083                                                            | Flavin single nucleotide (FMN)                  |  | 1.075                 |
| pme2292                                                            | Putrescine                                      |  | -2.478                |
| Zmyn004548                                                         | 12-Oxo-phytodienoic acid                        |  | -1.274                |
| Lmbn001609                                                         | 2-Acetyl-2-hydroxybutanoic acid                 |  | -1.142                |
| mws1346                                                            | DL-2-Aminoadipic acid                           |  | 3.389                 |
| pme0014                                                            | L-Glutamic acid                                 |  | 1.760                 |
| pme0256                                                            | Xanthine                                        |  | -1.668                |
| mws4085                                                            | Sinapic acid                                    |  | -1.183                |
| mws0668                                                            | Xanthosine                                      |  | -1.527                |
| mws4170                                                            | D-Glucose                                       |  | -1.009                |
| Rfmb319                                                            | Pipecolic acid                                  |  | -1.869                |
| pme0021                                                            | L-Phenylalanine                                 |  | -1.064                |
| pme0026                                                            | L-Lysine                                        |  | -1.935                |
| pmb0981                                                            | Adenosine 5'-monophosphate                      |  | 2.090                 |
| pme1662                                                            | 5,4'-Dihydroxy-7-methoxyflavanone (Sakuranetin) |  | 1.893                 |
| mws1050                                                            | O-Acetylserine                                  |  | 1.086                 |
| pme3827                                                            | 3,4-Dihydroxy-L-phenylalanine (L-Dopa)          |  | 1.620                 |
| MWSCX014                                                           | Scopoletin (7-Hydroxy-5-methoxycoumarin)        |  | 1.671                 |
| pme0534                                                            | Gluconic acid                                   |  | 1.360                 |
| pme2735                                                            | S-Adenosyl-L-methionine                         |  | -1.048                |
| pme2527                                                            | L-Ornithine                                     |  | -2.285                |
| mws0254                                                            | L-Histidine                                     |  | -3.006                |
| pme1712                                                            | L-Saccharopine                                  |  | 1.369                 |
| pme0010                                                            | L-Serine                                        |  | 2.086                 |
| pme1002                                                            | L-Tyramine                                      |  | -2.270                |

|                                                                                            |                                          |  |         |
|--------------------------------------------------------------------------------------------|------------------------------------------|--|---------|
| Zmyn000155                                                                                 | N- $\alpha$ -Acetyl-L-ornithine          |  | -1.688  |
| Zmzn000078                                                                                 | Dihydroxyacetone phosphate               |  | 1.339   |
| pme2380                                                                                    | $\alpha$ -Ketoglutaric acid              |  | 1.177   |
| Lmbp000123                                                                                 | L-Homomethionine                         |  | -2.590  |
| pme0006                                                                                    | L-Proline                                |  | -1.642  |
| pme1987                                                                                    | L-Alanine                                |  | -1.018  |
| pme0195                                                                                    | L-Cysteine                               |  | -13.209 |
| pmb3074                                                                                    | 5-O-p-Coumaroylquinic acid               |  | 1.009   |
| pme0516                                                                                    | Inositol                                 |  | 1.657   |
| mws0232                                                                                    | Riboflavin (Vitamin B2)                  |  | -1.104  |
|                                                                                            |                                          |  |         |
| <b><i>Phenylpropanoid biosynthesis (ko00940, P = 0.8950)</i></b>                           |                                          |  |         |
| pme3255                                                                                    | Methyleugenol                            |  | 2.578   |
| pme0021                                                                                    | L-Phenylalanine                          |  | -1.064  |
| pmb3074                                                                                    | 5-O-p-Coumaroylquinic acid               |  | 1.009   |
| pmp001214                                                                                  | Sinapine                                 |  | -2.432  |
| MWSCX014                                                                                   | Scopoletin (7-Hydroxy-5-methoxycoumarin) |  | 1.671   |
| Hmln002806                                                                                 | 5-O-Caffeoylshikimic acid                |  | 1.027   |
| mws4085                                                                                    | Sinapic acid                             |  | -1.183  |
|                                                                                            |                                          |  |         |
| <b><i>Isoquinoline alkaloid biosynthesis (ko00950, P = 0.5288)</i></b>                     |                                          |  |         |
| pme3827                                                                                    | 3,4-Dihydroxy-L-phenylalanine (L-Dopa)   |  | 1.620   |
| pme1002                                                                                    | L-Tyramine                               |  | -2.270  |
|                                                                                            |                                          |  |         |
| <b><i>Tropane, piperidine and pyridine alkaloid biosynthesis (ko00960, P = 0.1987)</i></b> |                                          |  |         |
| pme0026                                                                                    | L-Lysine                                 |  | -1.935  |
| Rfmb319                                                                                    | Pipecolic acid                           |  | -1.869  |
| pme2292                                                                                    | Putrescine                               |  | -2.478  |
| pme0021                                                                                    | L-Phenylalanine                          |  | -1.064  |
| Lmrn003000                                                                                 | 2-Hydroxy-3-phenylpropanoic acid         |  | -9.494  |
|                                                                                            |                                          |  |         |
| <b><i>Indole alkaloid biosynthesis (ko00901, P = 0.6974)</i></b>                           |                                          |  |         |
| mws4170                                                                                    | D-Glucose                                |  | -1.009  |

**Table S17.** Differentially abundant phenylpropanoids (Class I) detected in RN0

| Index (formula)              | Compounds                                                | VIP   | Log <sub>2</sub> (FC) | Class |
|------------------------------|----------------------------------------------------------|-------|-----------------------|-------|
| <b>Isoflavones</b>           |                                                          |       |                       |       |
| pmp000550 (C22H22O10)        | Calycosin-7-O-glucoside                                  | 1.049 | 1.166                 | SM    |
| <b>Coumarins</b>             |                                                          |       |                       |       |
| mws1074 (C9H6O4)             | Daphnetin                                                | 1.274 | 1.635                 | SM    |
| MWSCX014 (C10H8O4)           | Scopoletin (7-Hydroxy-5-methoxycoumarin)                 | 1.198 | 1.671                 | SM    |
| Hmcp002123 (C10H8O4)         | Isoscapoletin (6-Hydroxy-7-Methoxycoumarin)              | 1.149 | 1.416                 | SM    |
| mws1076 (C11H10O4)           | Scoparone                                                | 1.267 | 2.941                 | SM    |
| mws4173 (C11H10O4)           | 5,7-Dimethoxycoumarin (Limettin) (Citropten)             | 1.277 | -1.215                | SM    |
| pmp000284 (C11H10O5)         | Fraxidin (8-Hydroxy-6,7-dimethoxycoumarin)               | 1.236 | 3.363                 | SM    |
| mws1639 (C11H10O5)           | Isofraxidin                                              | 1.231 | 3.252                 | SM    |
| Zmln002252 (C10H8O6)         | Sideretin (5,7,8-Trihydroxy-6-methoxycoumarin)           | 1.178 | -1.344                | SM    |
| Hmlp006964 (C12H12O5)        | 5,6,7-Trimethoxycoumarin                                 | 1.235 | 2.931                 | SM    |
| Zmnn010135 (C15H16O4)        | Sibiricol                                                | 1.202 | 1.293                 | SM    |
| Cmpp005475 (C15H16O4)        | Meranzin                                                 | 1.231 | 1.471                 | SM    |
| pmf0525 (C16H14O4)           | Imperatorin                                              | 1.282 | 1.419                 | SM    |
| Cmpp010709 (C19H22O3)        | Aurapten                                                 | 1.304 | 7.921                 | SM    |
| Lmzp003497 (C19H24O5)        | Marmin [7-(6',7'-Dihydroxygeranyloxy) coumarin]          | 1.313 | 9.756                 | SM    |
| pma0104 (C20H16O7)           | N-Sinapoylhydroxycoumarin                                | 1.202 | -1.206                | SM    |
| Hmhp002580 (C19H24O10)       | Methylpicraquassioside A                                 | 1.093 | 1.270                 | SM    |
| Cmpp004946 (C26H32O8)        | Isoobacunoic acid                                        | 1.284 | -1.028                | SM    |
| <b>Lignans</b>               |                                                          |       |                       |       |
| HJN083 (C26H34O11)           | Lariciresinol-4'-O-glucoside                             | 1.128 | -1.186                | SM    |
| Lmdn001925 (C26H34O12)       | Olivil-4'-O-glucoside                                    | 1.311 | -10.604               | SM    |
| Hmln002355 (C27H34O12)       | 5'-Methoxymatairesinoside                                | 1.281 | -1.412                | SM    |
| Lmqn001932 (C28H36O13)       | Syringaresinol-4'-O-glucoside                            | 1.282 | -2.099                | SM    |
| Zmhn001446 (C28H36O13)       | syringaresinol-4'-O-glucopyranosid                       | 1.259 | -1.347                | SM    |
| Rfmb26201 (C30H38O14)        | Syringaresinol-4'-O-(6"-acetyl) glucoside                | 1.249 | -1.551                | SM    |
| <b>Flavonoid carbonoside</b> |                                                          |       |                       |       |
| pmp000236 (C26H28O14)        | Isovitexin-8-O-xylcoside                                 | 1.296 | -1.850                | SM    |
| MWSSlk254 (C27H30O15)        | Kaempferol-3-O-glucorhamnoside                           | 1.303 | -8.316                | SM    |
| pme1665 (C27H30O15)          | Isovitexin-7-O-glucoside (Saponarin)                     | 1.310 | 8.988                 | SM    |
| pmb0665 (C27H30O16)          | Orientin-7-O-glucoside                                   | 1.313 | 9.368                 | SM    |
| pmb0618 (C28H34O16)          | Hesperetin-8-C-glucoside-3'-O-glucoside                  | 1.314 | -10.562               | SM    |
| <b>Flavonols</b>             |                                                          |       |                       |       |
| mws0988 (C16H12O7)           | Rhamnetin                                                | 1.311 | -8.351                | SM    |
| pmn001551 (C21H22O9)         | Natsudaidin (3-Hydroxy-3',4',5,6,7,8-hexamethoxyflavone) | 1.191 | -1.190                | SM    |
| mws0089 (C21H20O11)          | Kaempferol-7-O-glucoside                                 | 1.312 | -10.736               | SM    |
| Lmpn006208 (C22H22O11)       | 8-Methoxykaempferol-7-O-rhamnoside                       | 1.287 | -1.138                | SM    |
| pmn001642 (C23H20O13)        | Kaempferol-3-O-(2"-O-acetyl) glucuronide                 | 1.316 | 13.299                | SM    |
| Zmsp004363 (C23H22O13)       | Quercetin-3-O-(6"-acetyl) glucoside                      | 1.313 | 10.627                | SM    |
| Hmln002199 (C23H22O13)       | Quercetin-3-O-(6"-acetyl) galactoside                    | 1.299 | -10.070               | SM    |
| Li512111 (C24H24O13)         | Isorhamnetin-3-O-(6"-acetyl)glucoside                    | 1.314 | -11.602               | SM    |
| Hmln002189 (C24H22O15)       | Quercetin-3-O-(6"-malonyl) galactoside                   | 1.310 | -12.037               | SM    |
| Hmcp001578 (C28H32O17)       | Isorhamnetin-3,7-O-diglucoside                           | 1.312 | -3.355                | SM    |
| <b>Flavonoid</b>             |                                                          |       |                       |       |
| Lmyn006227 (C15H10O5)        | Galangin (3,5,7-Trihydroxyflavone)                       | 1.313 | 8.678                 | SM    |
| Lmgp004283 (C16H13O5+)       | 5-Methoxyluteolinidin                                    | 1.283 | -4.337                | SM    |
| Cmsp008121 (C16H14O5)        | 7-O-Methylnaringenin                                     | 1.085 | 1.471                 | SM    |

|                        |                                                 |       |         |    |
|------------------------|-------------------------------------------------|-------|---------|----|
| pme1662 (C16H14O5)     | 5,4'-Dihydroxy-7-methoxyflavanone (Sakuranetin) | 1.199 | 1.893   | SM |
| pmp000109 (C19H18O6)   | 5,7,8,4'-Tetramethoxyflavone                    | 1.305 | -1.686  | SM |
| MWSHY0118 (C19H18O6)   | Scutellarein tetramethyl ether                  | 1.108 | 1.618   | SM |
| pmp000010 (C17H14O8)   | 5,7,4',5'-Tetrahydro-3',6-dimethoxyflavone      | 1.306 | -9.145  | SM |
| mws1313 (C20H20O7)     | Sinensetin (5,6,7,3',4'-pentamethoxyflavone)    | 1.082 | 1.305   | SM |
| MWSHY0018 (C21H22O8)   | Nobiletin (5,6,7,8,3',4'-Hexamethoxyflavone)    | 1.315 | 8.917   | SM |
| pmb0580 (C21H20O9)     | Chrysin-5-O-glucoside (Toringin)                | 1.315 | -11.128 | SM |
| Lmyp004617 (C21H22O9)  | Pinocembrin-7-O-glucoside (Pinocembroside)      | 1.245 | -1.034  | SM |
| Lmlp003531 (C21H20O11) | Luteolin-3'-O-glucoside                         | 1.316 | -11.365 | SM |
| pmp000172 (C23H24O11)  | 5,2'-Dihydroxy-7,8-dimethoxyflavone glycosides  | 1.150 | 1.827   | SM |
| Hmcp002187 (C23H24O13) | Limocitrin-3-O-galactoside                      | 1.308 | 10.189  | SM |
| HJAP006 (C23H24O13)    | Syringetin-7-O-glucoside                        | 1.050 | 1.071   | SM |
| pma0760 (C25H24O15)    | 3'-O-Methyltricetin-7-O-(6"-malonyl) glucoside  | 1.303 | -10.437 | SM |
| mws1073 (C27H30O15)    | Apigenin-6,8-di-C-glucoside (Vicenin-2)         | 1.279 | -8.079  | SM |
| HJN051 (C28H32O16)     | Tamarixetin-3-O-rutinoside                      | 1.310 | -9.800  | SM |
| pmb0578 (C32H30O15)    | Luteolin-7-O-(6"-sinapoyl) glucoside            | 1.314 | -9.881  | SM |
| <b>Anthocyanins</b>    |                                                 |       |         |    |
| pmb2962 (C23H23O11+)   | Pelargonidin-3-O-(6"-O-acetyl) glucoside        | 1.315 | 11.546  | SM |
| <b>Dihydroflavonol</b> |                                                 |       |         |    |
| mws1361 (C21H22O11)    | Taxifolin-3-O-rhamnoside (Astilbin)             | 1.309 | 9.720   | SM |
| HJN104 (C21H22O13)     | Dihydromyricetin-3-O-glucoside                  | 1.181 | -1.212  | SM |
| <b>Dihydroflavone</b>  |                                                 |       |         |    |
| pmp000114 (C21H24O8)   | 5,6,7,8,3',4'-Hexamethoxyflavanone              | 1.315 | -9.720  | SM |
| mws0046 (C27H32O14)    | Naringenin-7-O-Neohesperidoside (Naringin)      | 1.251 | 2.461   | SM |
| mws1066 (C27H32O14)    | Naringenin-7-O-Rutinoside (Narirutin)           | 1.290 | 2.483   | SM |
| <b>Phenylpropanoid</b> |                                                 |       |         |    |
| mws1195 (C10H10O3)     | p-Coumaric acid methyl ester                    | 1.313 | 2.742   | SM |
| pmb2795 (C10H10O3)     | 4-Methoxycinnamic acid                          | 1.311 | 2.799   | SM |
| pmb2620 (C11H12O4)     | 3,4-Dimethoxycinnamic acid                      | 1.267 | 1.072   | SM |
| mws4085 (C11H12O5)     | Sinapic acid                                    | 1.158 | -1.183  | SM |
| pmn001669 (C12H14O5)   | Methyl sinapate                                 | 1.300 | -1.893  | SM |
| Lmhn002926 (C13H12O7)  | p-Coumaroylmalic acid                           | 1.300 | 1.722   | SM |
| Hmln002806 (C16H16O8)  | 5-O-Caffeoylshikimic acid                       | 1.140 | 1.027   | SM |
| pma6460 (C16H18O8)     | 4-O-p-Coumaroylquinic acid                      | 1.235 | 1.347   | SM |
| pmb3074 (C16H18O8)     | 5-O-p-Coumaroylquinic acid                      | 1.208 | 1.009   | SM |
| pmn001420 (C15H18O9)   | 1-O-[(E)-Caffeoyl]-D-glucose                    | 1.254 | -1.080  | SM |
| Zmhn001793 (C15H18O9)  | 6-O-Caffeoyl-D-glucose                          | 1.232 | -1.100  | SM |
| Hmmn002544 (C16H20O9)  | Ferulic acid-4-O-glucoside                      | 1.312 | -2.456  | SM |
| Zmhn002334 (C16H20O9)  | 6-O-Feruloyl-D-glucose                          | 1.316 | -12.656 | SM |
| Hmhn003518 (C16H20O9)  | 4-O-β-D-glucopyranosylferulic acid              | 1.280 | -1.866  | SM |
| pmb0752 (C17H20O9)     | 3-O-Feruloylquinic acid                         | 1.271 | 1.200   | SM |
| Lmbp002309 (C17H22O9)  | Sinapaldehyde-4-O-Glucoside                     | 1.085 | 1.084   | SM |
| Zmhn002227 (C17H22O10) | 4-O-Glucosyl-sinapate                           | 1.308 | -1.351  | SM |
| Lmhn002573 (C17H20O11) | Sinapoylglucuronic acid                         | 1.263 | -1.160  | SM |
| pmn001319 (C22H22O8)   | 1-O-Feruloyl-3-O-p-Coumaroylglycerol            | 1.035 | 5.472   | SM |
| mad2116 (C22H18O10)    | Bis(p-Coumaroyl) tartaric acid                  | 1.314 | -10.125 | SM |
| pmb3066 (C22H26O12)    | 5-O-p-Coumaroylshikimic acid O-glucoside        | 1.315 | -10.750 | SM |
| pmn001382 (C25H24O12)  | Isochlorogenic acid A                           | 1.316 | 15.134  | SM |
| pmn001384 (C25H24O12)  | Isochlorogenic acid C                           | 1.316 | 14.925  | SM |
| pmn001672 (C23H32O15)  | Furanofructosyl-α-D-(3-mustard acyl) glucoside  | 1.229 | 1.371   | SM |

|                                                               |                      |       |        |    |
|---------------------------------------------------------------|----------------------|-------|--------|----|
| Lmsn003628 (C <sub>23</sub> H <sub>32</sub> O <sub>15</sub> ) | 6'-O-Sinapoylsucrose | 1.215 | 1.149  | SM |
| pmb2936 (C <sub>28</sub> H <sub>32</sub> O <sub>14</sub> )    | Disinapoyl glucoside | 1.193 | -2.647 | SM |
| mws1150 (C <sub>35</sub> H <sub>46</sub> O <sub>20</sub> )    | Echinacoside         | 1.107 | -1.030 | SM |

**Table S18.** Differentially abundant phenolic compounds detected in RN0

| Index (formula)                                               | Compounds                                                 | VIP   | Log <sub>2</sub> (FC) | Class |
|---------------------------------------------------------------|-----------------------------------------------------------|-------|-----------------------|-------|
| <b>Phenols</b>                                                |                                                           |       |                       |       |
| <b>Xanthone</b>                                               |                                                           |       |                       |       |
| pmp001006 (C <sub>16</sub> H <sub>14</sub> O <sub>5</sub> )   | 1,3,7-Trimethoxyxanthone                                  | 1.271 | -2.027                | SM    |
| <b>Tannin</b>                                                 |                                                           |       |                       |       |
| mws0024 (C <sub>7</sub> H <sub>6</sub> O <sub>5</sub> )       | Gallic acid                                               | 1.150 | -1.922                | SM    |
| Hmln000873 (C <sub>13</sub> H <sub>16</sub> O <sub>10</sub> ) | 2-O-Galloyl-D-glucose                                     | 1.315 | 13.529                | SM    |
| <b>Others</b>                                                 |                                                           |       |                       |       |
| Lmtn002233 (C <sub>15</sub> H <sub>20</sub> O <sub>8</sub> )  | Androsin                                                  | 1.057 | -1.269                | SM    |
| MWSmce417 (C <sub>22</sub> H <sub>28</sub> O <sub>10</sub> )  | 5-O-Methylvisammioside                                    | 1.315 | 12.635                | SM    |
| <b>Organic acids</b>                                          |                                                           |       |                       |       |
| Zmyn002323 (C <sub>8</sub> H <sub>8</sub> O <sub>3</sub> )    | 2-Hydroxyphenylacetic acid                                | 1.305 | -4.228                | SM    |
| <b>Lignans</b>                                                |                                                           |       |                       |       |
| HJN083 (C <sub>26</sub> H <sub>34</sub> O <sub>11</sub> )     | Lariciresinol-4'-O-glucoside                              | 1.128 | -1.186                | SM    |
| Lmdn001925 (C <sub>26</sub> H <sub>34</sub> O <sub>12</sub> ) | Olivil-4'-O-glucoside                                     | 1.311 | -10.604               | SM    |
| Hmln002355 (C <sub>27</sub> H <sub>34</sub> O <sub>12</sub> ) | 5'-Methoxymatairesinoside                                 | 1.281 | -1.412                | SM    |
| Lmqn001932 (C <sub>28</sub> H <sub>36</sub> O <sub>13</sub> ) | Syringaresinol-4'-O-glucoside                             | 1.282 | -2.099                | SM    |
| Zmhn001446 (C <sub>28</sub> H <sub>36</sub> O <sub>13</sub> ) | syringaresinol-4'-O-glucopyranosid                        | 1.259 | -1.347                | SM    |
| Rfmb26201 (C <sub>30</sub> H <sub>38</sub> O <sub>14</sub> )  | Syringaresinol-4'-O-(6"-acetyl) glucoside                 | 1.249 | -1.551                | SM    |
| <b>Isoflavones</b>                                            |                                                           |       |                       |       |
| pmp000550 (C <sub>22</sub> H <sub>22</sub> O <sub>10</sub> )  | Calycosin-7-O-glucoside                                   | 1.049 | 1.166                 | SM    |
| <b>Flavonols</b>                                              |                                                           |       |                       |       |
| mws0988 (C <sub>16</sub> H <sub>12</sub> O <sub>7</sub> )     | Rhamnetin                                                 | 1.311 | -8.351                | SM    |
| pmn001551 (C <sub>21</sub> H <sub>22</sub> O <sub>9</sub> )   | Natsudaïdain (3-Hydroxy-3',4',5,6,7,8-hexamethoxyflavone) | 1.191 | -1.190                | SM    |
| mws0089 (C <sub>21</sub> H <sub>20</sub> O <sub>11</sub> )    | Kaempferol-7-O-glucoside                                  | 1.312 | -10.736               | SM    |
| Lmpn006208 (C <sub>22</sub> H <sub>22</sub> O <sub>11</sub> ) | 8-Methoxykaempferol-7-O-rhamnoside                        | 1.287 | -1.138                | SM    |
| pmn001642 (C <sub>23</sub> H <sub>20</sub> O <sub>13</sub> )  | Kaempferol-3-O-(2"-O-acetyl) glucuronide                  | 1.316 | 13.299                | SM    |
| Zmsp004363 (C <sub>23</sub> H <sub>22</sub> O <sub>13</sub> ) | Quercetin-3-O-(6"-acetyl) glucoside                       | 1.313 | 10.627                | SM    |
| Hmln002199 (C <sub>23</sub> H <sub>22</sub> O <sub>13</sub> ) | Quercetin-3-O-(6"-acetyl) galactoside                     | 1.299 | -10.070               | SM    |
| Li512111 (C <sub>24</sub> H <sub>24</sub> O <sub>13</sub> )   | Isorhamnetin-3-O-(6"-acetyl)glucoside)                    | 1.314 | -11.602               | SM    |
| Hmln002189 (C <sub>24</sub> H <sub>22</sub> O <sub>15</sub> ) | Quercetin-3-O-(6"-malonyl) galactoside                    | 1.310 | -12.037               | SM    |
| Hmcp001578 (C <sub>28</sub> H <sub>32</sub> O <sub>17</sub> ) | Isorhamnetin-3,7-O-diglucoside                            | 1.312 | -3.355                | SM    |
| <b>Flavonoid carbonoside</b>                                  |                                                           |       |                       |       |
| pmp000236 (C <sub>26</sub> H <sub>28</sub> O <sub>14</sub> )  | Isovitexin-8-O-xylcoside                                  | 1.296 | -1.850                | SM    |
| MWSSlk254 (C <sub>27</sub> H <sub>30</sub> O <sub>15</sub> )  | Kaempferol-3-O-glucorhamnoside                            | 1.303 | -8.316                | SM    |
| pme1665 (C <sub>27</sub> H <sub>30</sub> O <sub>15</sub> )    | Isovitexin-7-O-glucoside (Saponarin)                      | 1.310 | 8.988                 | SM    |
| pmb0665 (C <sub>27</sub> H <sub>30</sub> O <sub>16</sub> )    | Orientin-7-O-glucoside                                    | 1.313 | 9.368                 | SM    |
| pmb0618 (C <sub>28</sub> H <sub>34</sub> O <sub>16</sub> )    | Hesperetin-8-C-glucoside-3'-O-glucoside                   | 1.314 | -10.562               | SM    |
| <b>Flavonoid</b>                                              |                                                           |       |                       |       |
| Lmyn006227 (C <sub>15</sub> H <sub>10</sub> O <sub>5</sub> )  | Galangin (3,5,7-Trihydroxyflavone)                        | 1.313 | 8.678                 | SM    |
| Lmgp004283 (C <sub>16</sub> H <sub>13</sub> O <sub>5</sub> +) | 5-Methoxyluteolinidin                                     | 1.283 | -4.337                | SM    |
| Cmsp008121 (C <sub>16</sub> H <sub>14</sub> O <sub>5</sub> )  | 7-O-Methylnaringenin                                      | 1.085 | 1.471                 | SM    |
| pme1662 (C <sub>16</sub> H <sub>14</sub> O <sub>5</sub> )     | 5,4'-Dihydroxy-7-methoxyflavanone (Sakuranetin)           | 1.199 | 1.893                 | SM    |
| pmp000109 (C <sub>19</sub> H <sub>18</sub> O <sub>6</sub> )   | 5,7,8,4'-Tetramethoxyflavone                              | 1.305 | -1.686                | SM    |
| MWSHY0118 (C <sub>19</sub> H <sub>18</sub> O <sub>6</sub> )   | Scutellarein tetramethyl ether                            | 1.108 | 1.618                 | SM    |
| pmp000010 (C <sub>17</sub> H <sub>14</sub> O <sub>8</sub> )   | 5,7,4',5'-Tetrahydro-3',6-dimethoxyflavone                | 1.306 | -9.145                | SM    |
| mws1313 (C <sub>20</sub> H <sub>20</sub> O <sub>7</sub> )     | Sinensetin (5,6,7,3',4'-pentamethoxyflavone)              | 1.082 | 1.305                 | SM    |
| MWSHY0018 (C <sub>21</sub> H <sub>22</sub> O <sub>8</sub> )   | Nobiletin (5,6,7,8,3',4'-Hexamethoxyflavone)              | 1.315 | 8.917                 | SM    |
| pmb0580 (C <sub>21</sub> H <sub>20</sub> O <sub>9</sub> )     | Chrysin-5-O-glucoside (Toringin)                          | 1.315 | -11.128               | SM    |

|                               |                                                 |       |         |    |
|-------------------------------|-------------------------------------------------|-------|---------|----|
| Lmyp004617 (C21H22O9)         | Pinocembrin-7-O-glucoside (Pinocembroside)      | 1.245 | -1.034  | SM |
| Lmlp003531 (C21H20O11)        | Luteolin-3'-O-glucoside                         | 1.316 | -11.365 | SM |
| pmp000172 (C23H24O11)         | 5,2'-Dihydroxy-7,8-dimethoxyflavone glycosides  | 1.150 | 1.827   | SM |
| Hmcp002187 (C23H24O13)        | Limocitrin-3-O-galactoside                      | 1.308 | 10.189  | SM |
| HJAP006 (C23H24O13)           | Syringetin-7-O-glucoside                        | 1.050 | 1.071   | SM |
| pma0760 (C25H24O15)           | 3'-O-Methyltricetin-7-O-(6"-malonyl) glucoside  | 1.303 | -10.437 | SM |
| mws1073 (C27H30O15)           | Apigenin-6,8-di-C-glucoside (Vicenin-2)         | 1.279 | -8.079  | SM |
| HJN051 (C28H32O16)            | Tamarixetin-3-O-rutinoside                      | 1.310 | -9.800  | SM |
| pmb0578 (C32H30O15)           | Luteolin-7-O-(6"-sinapoyl) glucoside            | 1.314 | -9.881  | SM |
| <b><i>Dihydroflavonol</i></b> |                                                 |       |         |    |
| mws1361 (C21H22O11)           | Taxifolin-3-O-rhamnoside (Astilbin)             | 1.309 | 9.720   | SM |
| HJN104 (C21H22O13)            | Dihydromyricetin-3-O-glucoside                  | 1.181 | -1.212  | SM |
| <b><i>Dihydroflavone</i></b>  |                                                 |       |         |    |
| pmp000114 (C21H24O8)          | 5,6,7,8,3',4'-Hexamethoxyflavanone              | 1.315 | -9.720  | SM |
| mws0046 (C27H32O14)           | Naringenin-7-O-Neohesperidoside (Naringin)      | 1.251 | 2.461   | SM |
| mws1066 (C27H32O14)           | Naringenin-7-O-Rutinoside (Narirutin)           | 1.290 | 2.483   | SM |
| <b><i>Coumarins</i></b>       |                                                 |       |         |    |
| Cmpp004946 (C26H32O8)         | Isoobacunoic acid                               | 1.284 | -1.028  | SM |
| mws1074 (C9H6O4)              | Daphnetin                                       | 1.274 | 1.635   | SM |
| MWSCX014 (C10H8O4)            | Scopoletin (7-Hydroxy-5-methoxycoumarin)        | 1.198 | 1.671   | SM |
| Hmcp002123 (C10H8O4)          | Isoscopoletin (6-Hydroxy-7-Methoxycoumarin)     | 1.149 | 1.416   | SM |
| mws1076 (C11H10O4)            | Scoparone                                       | 1.267 | 2.941   | SM |
| mws4173 (C11H10O4)            | 5,7-Dimethoxycoumarin (Limettin) (Citropten)    | 1.277 | -1.215  | SM |
| pmp000284 (C11H10O5)          | Fraxidin (8-Hydroxy-6,7-dimethoxycoumarin)      | 1.236 | 3.363   | SM |
| mws1639 (C11H10O5)            | Isofraxidin                                     | 1.231 | 3.252   | SM |
| Zmln002252 (C10H8O6)          | Sideretin (5,7,8-Trihydroxy-6-methoxycoumarin)  | 1.178 | -1.344  | SM |
| Hmlp006964 (C12H12O5)         | 5,6,7-Trimethoxycoumarin                        | 1.235 | 2.931   | SM |
| Zmnn010135 (C15H16O4)         | Sibiricol                                       | 1.202 | 1.293   | SM |
| Cmpp005475 (C15H16O4)         | Meranzin                                        | 1.231 | 1.471   | SM |
| pmf0525 (C16H14O4)            | Imperatorin                                     | 1.282 | 1.419   | SM |
| Cmpp010709 (C19H22O3)         | Aurapten                                        | 1.304 | 7.921   | SM |
| Lmzp003497 (C19H24O5)         | Marmin [7-(6',7'-Dihydroxygeranyloxy) coumarin] | 1.313 | 9.756   | SM |
| pma0104 (C20H16O7)            | N-Sinapoylhydroxycoumarin                       | 1.202 | -1.206  | SM |
| Hmhp002580 (C19H24O10)        | Methylpicraquassioside A                        | 1.093 | 1.270   | SM |
| <b><i>Anthocyanins</i></b>    |                                                 |       |         |    |
| pmb2962 (C23H23O11+)          | Pelargonidin-3-O-(6"-O-acetyl) glucoside        | 1.315 | 11.546  | SM |
| <b><i>Phenolic acids</i></b>  |                                                 |       |         |    |
| <b><i>Phenolic acids</i></b>  |                                                 |       |         |    |
| mws1195 (C10H10O3)            | p-Coumaric acid methyl ester                    | 1.313 | 2.742   | SM |
| pmb2795 (C10H10O3)            | 4-Methoxycinnamic acid                          | 1.311 | 2.799   | SM |
| pmb2620 (C11H12O4)            | 3,4-Dimethoxycinnamic acid                      | 1.267 | 1.072   | SM |
| mws4085 (C11H12O5)            | Sinapic acid                                    | 1.158 | -1.183  | SM |
| pmn001669 (C12H14O5)          | Methyl sinapate                                 | 1.300 | -1.893  | SM |
| Lmhn002926 (C13H12O7)         | p-Coumaroylmalic acid                           | 1.300 | 1.722   | SM |
| Hmln002806 (C16H16O8)         | 5-O-Caffeoylshikimic acid                       | 1.140 | 1.027   | SM |
| pma6460 (C16H18O8)            | 4-O-p-Coumaroylquinic acid                      | 1.235 | 1.347   | SM |
| pmb3074 (C16H18O8)            | 5-O-p-Coumaroylquinic acid                      | 1.208 | 1.009   | SM |
| pmn001420 (C15H18O9)          | 1-O-[(E)-Caffeoyl]-D-glucose                    | 1.254 | -1.080  | SM |

|                        |                                                         |       |         |    |
|------------------------|---------------------------------------------------------|-------|---------|----|
| Zmhn001793 (C15H18O9)  | 6-O-Caffeoyl-D-glucose                                  | 1.232 | -1.100  | SM |
| Hmmn002544 (C16H20O9)  | Ferulic acid-4-O-glucoside                              | 1.312 | -2.456  | SM |
| Zmhn002334 (C16H20O9)  | 6-O-Feruloyl-D-glucose                                  | 1.316 | -12.656 | SM |
| Hmhn003518 (C16H20O9)  | 4-O- $\beta$ -D-glucopyranosylferulic acid              | 1.280 | -1.866  | SM |
| pmb0752 (C17H20O9)     | 3-O-Feruloylquinic acid                                 | 1.271 | 1.200   | SM |
| Lmbp002309 (C17H22O9)  | Sinapaldehyde-4-O-glucoside                             | 1.085 | 1.084   | SM |
| Zmhn002227 (C17H22O10) | 4-O-Glucosyl-sinapate                                   | 1.308 | -1.351  | SM |
| Lmhn002573 (C17H20O11) | Sinapoylglucuronic acid                                 | 1.263 | -1.160  | SM |
| pmn001319 (C22H22O8)   | 1-O-Feruloyl-3-O-p-Coumaroylglycerol                    | 1.035 | 5.472   | SM |
| mad2116 (C22H18O10)    | Bis(p-Coumaroyl) tartaric acid                          | 1.314 | -10.125 | SM |
| pmb3066 (C22H26O12)    | 5-O-p-Coumaroylshikimic acid O-glucoside                | 1.315 | -10.750 | SM |
| pmn001382 (C25H24O12)  | Isochlorogenic acid A                                   | 1.316 | 15.134  | SM |
| pmn001384 (C25H24O12)  | Isochlorogenic acid C                                   | 1.316 | 14.925  | SM |
| pmn001672 (C23H32O15)  | Furanofructosyl- $\alpha$ -D-(3-mustard acyl) glucoside | 1.229 | 1.371   | SM |
| Lmsn003628 (C23H32O15) | 6'-O-Sinapoylsucrose                                    | 1.215 | 1.149   | SM |
| pmb2936 (C28H32O14)    | Disinapoyl glucoside                                    | 1.193 | -2.647  | SM |
| mws1150 (C35H46O20)    | Echinacoside                                            | 1.107 | -1.030  | SM |
| ML10179289 (C8H10O)    | 2-Phenylethanol                                         | 1.316 | 17.522  | SM |
| Lmbn001981 (C7H6O3)    | 2,5-Dihydroxybenzaldehyde                               | 1.293 | -1.042  | SM |
| mws0182 (C8H8O3)       | p-Hydroxyphenyl acetic acid                             | 1.234 | -1.334  | SM |
| pme2362 (C8H8O3)       | Mandelic acid                                           | 1.187 | -1.785  | SM |
| mws1686 (C9H10O3)      | Paeonol                                                 | 1.315 | 13.581  | SM |
| pme3255 (C11H14O2)     | Methyleugenol                                           | 1.036 | 2.578   | SM |
| mws0117 (C9H10O4)      | Homovanillic acid; 4-Hydroxy-3-methoxyphenylacetic acid | 1.315 | -13.215 | SM |
| Lmjp004702 (C9H10O4)   | 2',4'-Dihydroxy-6'-methoxyacetophenone                  | 1.231 | 3.465   | SM |
| MWSslk062 (C15H14O3)   | 4'-Methoxyresveratrol                                   | 1.307 | -2.615  | SM |
| Lmmn005696 (C15H16O3)  | Desoxyhemigossypol                                      | 1.191 | 1.134   | SM |
| Hmhn000927 (C12H16O8)  | Phloroglucinol-1-O- $\beta$ -D-glucopyranoside          | 1.315 | 12.721  | SM |
| Zmhn001926 (C13H16O8)  | 1-O-Salicyl-D-glucose                                   | 1.259 | -1.185  | SM |
| Zmhn001358 (C13H16O8)  | 4-O-Glucosyl-4-hydroxybenzoic acid                      | 1.241 | -1.053  | SM |
| Hmtn001302 (C13H16O8)  | Glucosyloxybenzoic acid                                 | 1.237 | -1.159  | SM |
| mws2367 (C14H20O7)     | Salidroside                                             | 1.241 | -1.031  | SM |
| Lmtn002565 (C14H18O9)  | 1-O-Vanilloyl-D-Glucose                                 | 1.103 | 2.180   | SM |
| Cmjn004337 (C18H26O10) | Benzyl-(2"-O-xylosyl) glucoside                         | 1.316 | 10.881  | SM |
| Cmyp005062 (C20H22O9)  | Salireposide                                            | 1.311 | 2.992   | SM |
| pmb0069 (C7H7NO)       | Benzamide                                               | 1.300 | -3.598  | SM |
| Hmln003529 (C18H26O10) | Benzyl $\beta$ -primeveroside                           | 1.286 | 1.316   | SM |

**Table S19.** DEGs and DAMs in ROS detoxification and cell redox homeostasis in RN0

| Accession No.                                                                       | KEGG annotation                                                                                                                         | Swissprot annotation (KOG)                                                                                                                                                                                              | Log <sub>2</sub> (FC) |
|-------------------------------------------------------------------------------------|-----------------------------------------------------------------------------------------------------------------------------------------|-------------------------------------------------------------------------------------------------------------------------------------------------------------------------------------------------------------------------|-----------------------|
| <b><i>Reactive oxygen species biosynthetic process (GO:1903409, P = 0.6721)</i></b> |                                                                                                                                         |                                                                                                                                                                                                                         |                       |
| Cs5g09470                                                                           | K00276 primary-amine oxidase [EC:1.4.3.21]   (RefSeq) primary amine oxidase-like (A)                                                    | Primary amine oxidase; EC=1.4.3.21 {ECO:0000250 UniProtKB:P46883}; Amine oxidase [copper-containing]; Flags: Precursor (At4g12290)                                                                                      | 1.900                 |
| Cs3g19060                                                                           | K10534 nitrate reductase (NAD(P)H) [EC:1.7.1.1 1.7.1.2 1.7.1.3]   (RefSeq) nitrate reductase [NAD(P)H]-like (A)                         | Nitrate reductase [NAD(P)H]; NR; EC=1.7.1.2 (At1g37130_1)                                                                                                                                                               | -2.160                |
| <b><i>Aldehyde biosynthetic process (GO:0046184, P = 0.1525)</i></b>                |                                                                                                                                         |                                                                                                                                                                                                                         |                       |
| Cs6g07330                                                                           | K13691 pathogen-inducible salicylic acid glucosyltransferase [EC:2.4.1.-]   (RefSeq) UDP-glycosyltransferase 74E2-like (A)              | 7-deoxyloganetic acid glucosyltransferase; EC=2.4.1.323; UDP-glucose glucosyltransferase 8; CrUGT8; UDP-glycosyltransferase 709C2 (At1g22400)                                                                           | 3.820                 |
| Cs7g32240                                                                           | K13691 pathogen-inducible salicylic acid glucosyltransferase [EC:2.4.1.-]   (RefSeq) UDP-glycosyltransferase 74E2-like (A)              | 7-deoxyloganetic acid glucosyltransferase; EC=2.4.1.323; UDP-glucose glucosyltransferase 8; CrUGT8; UDP-glycosyltransferase 709C2 (At1g22360)                                                                           | 2.018                 |
| Cs2g16290                                                                           | K13691 pathogen-inducible salicylic acid glucosyltransferase [EC:2.4.1.-]   (RefSeq) UDP-glycosyltransferase 74E2-like (A)              | 7-deoxyloganetic acid glucosyltransferase; EC=2.4.1.323; UDP-glucose glucosyltransferase 8; CrUGT8; UDP-glycosyltransferase 709C2 (At1g22400)                                                                           | 2.052                 |
| Cs8g20230                                                                           | K06215 pyridoxal 5'-phosphate synthase pdxS subunit [EC:4.3.3.6]   (RefSeq) probable pyridoxal 5'-phosphate synthase subunit PDX1 (A)   | Probable pyridoxal 5'-phosphate synthase subunit PDX1; PLP synthase subunit PDX1; EC=4.3.3.6; Ethylene-inducible protein HEVER (At5g01410)                                                                              | -1.767                |
| Cs7g32250                                                                           | K13692 UDP-glucose:(indol-3-yl)acetate beta-D-glucosyltransferase [EC:2.4.1.121]   (RefSeq) UGT1; UDP-glycosyltransferase 84B2-like (A) | 7-deoxyloganetic acid glucosyltransferase; EC=2.4.1.323; UDP-glucose glucosyltransferase 8; CrUGT8; UDP-glycosyltransferase 709C2 (At1g22400)                                                                           | 2.002                 |
| orange1.1t02546                                                                     | K05275 pyridoxine 4-dehydrogenase [EC:1.1.1.65]   (RefSeq) pyridoxal reductase, chloroplastic (A)                                       | Pyridoxal reductase, chloroplastic; EC=1.1.1.65; Flags: Precursor (At5g53580)                                                                                                                                           | 1.387                 |
| <b><i>Reactive oxygen species metabolic process (GO:0072593, P = 0.0002)</i></b>    |                                                                                                                                         |                                                                                                                                                                                                                         |                       |
| Cs1g20630                                                                           | K13430 serine/threonine-protein kinase PBS1 [EC:2.7.11.1]   (RefSeq) serine/threonine-protein kinase CDL1 (A)                           | L-type lectin-domain containing receptor kinase IX.1 {ECO:0000303 PubMed:19773388}; LecRK-IX.1 {ECO:0000303 PubMed:19773388}; EC=2.7.11.1 {ECO:0000255 PROSITE-ProRule:PRU00159}; Flags: Precursor (At5g10530)          | 2.893                 |
| Cs1g20650                                                                           | K13430 serine/threonine-protein kinase PBS1 [EC:2.7.11.1]   (RefSeq) serine/threonine-protein kinase CDL1 (A)                           | L-type lectin-domain containing receptor kinase IX.1 {ECO:0000303 PubMed:19773388}; LecRK-IX.1 {ECO:0000303 PubMed:19773388}; EC=2.7.11.1 {ECO:0000255 PROSITE-ProRule:PRU00159}; Flags: Precursor (At5g10530)          | 1.809                 |
| orange1.1t01650                                                                     | --                                                                                                                                      | Type IV inositol polyphosphate 5-phosphatase 9 {ECO:0000303 PubMed:23658066}; At5PTase9 {ECO:0000303 PubMed:23658066}; EC=3.1.3.36 {ECO:0000269 PubMed:23658066}; EC=3.1.3.86 {ECO:0000269 PubMed:23658066} (At2g01900) | 2.197                 |

|                 |                                                                                        |                                                                                                                                                                               |        |
|-----------------|----------------------------------------------------------------------------------------|-------------------------------------------------------------------------------------------------------------------------------------------------------------------------------|--------|
| Cs5g09470       | K00276 primary-amine oxidase [EC:1.4.3.21]   (RefSeq) primary amine oxidase-like (A)   | Primary amine oxidase; EC=1.4.3.21 {ECO:0000250 UniProtKB:P46883}; Amine oxidase [copper-containing]; Flags: Precursor (At4g12290)                                            | 1.900  |
| Cs6g04560       | K00430 peroxidase [EC:1.11.1.7]   (RefSeq) peroxidase 21 (A)                           | Peroxidase 21; Atperox P21; EC=1.11.1.7; ATP2a/ATP2b; PRXR5; Flags: Precursor (At2g37130)                                                                                     | -2.280 |
| orange1.1t02225 | K00430 peroxidase [EC:1.11.1.7]   (RefSeq) LOW QUALITY PROTEIN: peroxidase A2-like (A) | Peroxidase 53; Atperox P53; EC=1.11.1.7; ATPA2; Flags: Precursor (At5g06720)                                                                                                  | -1.825 |
| orange1.1t02046 | K00430 peroxidase [EC:1.11.1.7]   (RefSeq) peroxidase A2 (A)                           | Peroxidase 15 {ECO:0000303 PubMed:17936696}; Prx15 {ECO:0000303 PubMed:17936696}; EC=1.11.1.7; Anionic peroxidase {ECO:0000303 PubMed:17936696}; Flags: Precursor (At5g06730) | -1.040 |
| Cs3g20770       | K00430 peroxidase [EC:1.11.1.7]   (RefSeq) peroxidase 13 (A)                           | Peroxidase 13; Atperox P13; EC=1.11.1.7; Flags: Precursor (At1g77100_1)                                                                                                       | 8.534  |
| Cs1g19890       | K00430 peroxidase [EC:1.11.1.7]   (RefSeq) peroxidase 17 (A)                           | Peroxidase 17; Atperox P17; EC=1.11.1.7; ATP25a; Flags: Precursor (At2g22420)                                                                                                 | -1.915 |
| Cs2g21820       | K00430 peroxidase [EC:1.11.1.7]   (RefSeq) peroxidase 30 (A)                           | Peroxidase 30; Atperox P30; EC=1.11.1.7; ATP7a; PRXR9; Flags: Precursor (At3g21770)                                                                                           | -2.920 |
| Cs5g32270       | K00430 peroxidase [EC:1.11.1.7]   (RefSeq) peroxidase 3 (A)                            | Peroxidase 3; Atperox P3; EC=1.11.1.7; ATPRC; RCI3A; Rare cold-inducible protein; Flags: Precursor (At1g05260)                                                                | -2.477 |
| Cs1g20230       | K00430 peroxidase [EC:1.11.1.7]   (RefSeq) peroxidase 4-like (A)                       | Peroxidase 4 {ECO:0000250 UniProtKB:Q42578}; EC=1.11.1.7; Flags: Precursor (At5g05340)                                                                                        | -2.964 |
| Cs1g24640       | K00430 peroxidase [EC:1.11.1.7]   (RefSeq) peroxidase 72 (A)                           | Peroxidase 72; Atperox P72; EC=1.11.1.7; ATP6a; PRXR8; Flags: Precursor (At5g66390)                                                                                           | -2.627 |
| Cs2g03110       | K00430 peroxidase [EC:1.11.1.7]   (RefSeq) peroxidase 42 (A)                           | Peroxidase 42; Atperox P42; EC=1.11.1.7; ATP1a/ATP1b; PRXR1; Flags: Precursor (At4g21960)                                                                                     | -1.812 |
| orange1.1t02045 | K00430 peroxidase [EC:1.11.1.7]   (RefSeq) peroxidase 15-like (A)                      | Peroxidase 15 {ECO:0000303 PubMed:17936696}; Prx15 {ECO:0000303 PubMed:17936696}; EC=1.11.1.7; Anionic peroxidase {ECO:0000303 PubMed:17936696}; Flags: Precursor (At5g06720) | -1.207 |
| Cs6g20170       | K00430 peroxidase [EC:1.11.1.7]   (RefSeq) peroxidase 31-like (A)                      | Peroxidase 63; Atperox P63; EC=1.11.1.7; ATP26a; Flags: Precursor (At5g40150)                                                                                                 | -1.099 |
| Cs3g25300       | K00430 peroxidase [EC:1.11.1.7]   (RefSeq) peroxidase 9 (A)                            | Peroxidase 9; Atperox P9; EC=1.11.1.7; ATP18a; Flags: Precursor (At1g44970)                                                                                                   | -2.503 |
| orange1.1t02033 | K00430 peroxidase [EC:1.11.1.7]   (RefSeq) peroxidase 59-like (A)                      | Peroxidase N; EC=1.11.1.7; Neutral peroxidase; Flags: Precursor (At5g19890)                                                                                                   | 1.411  |
| Cs7g13530       | K00430 peroxidase [EC:1.11.1.7]   (RefSeq) peroxidase 65-like (A)                      | Peroxidase 65; Atperox P65; EC=1.11.1.7; ATP43; Flags: Precursor (At5g47000)                                                                                                  | -3.439 |
| Cs9g05130       | K00430 peroxidase [EC:1.11.1.7]   (RefSeq) peroxidase 3-like (A)                       | Peroxidase 3; Atperox P3; EC=1.11.1.7; ATPRC; RCI3A; Rare cold-inducible protein; Flags: Precursor (At1g05260)                                                                | -2.828 |
| Cs3g26600       | K00430 peroxidase [EC:1.11.1.7]   (RefSeq) peroxidase 64 (A)                           | Peroxidase 64; Atperox P64; EC=1.11.1.7; ATP17a; PRXR4; Flags: Precursor (At5g42180)                                                                                          | -2.278 |
| orange1.1t02044 | K00430 peroxidase [EC:1.11.1.7]   (RefSeq) peroxidase E5-like (A)                      | Peroxidase C3; EC=1.11.1.7; Flags: Precursor (At2g38390)                                                                                                                      | -1.910 |
| Cs4g17860       | K00430 peroxidase [EC:1.11.1.7]   (RefSeq) peroxidase 25 (A)                           | Peroxidase 25; Atperox P25; EC=1.11.1.7; Flags: Precursor (At2g41480)                                                                                                         | 1.546  |
| Cs3g21730       | K00430 peroxidase [EC:1.11.1.7]   (RefSeq) peroxidase 12 (A)                           | Peroxidase 12; Atperox P12; EC=1.11.1.7; ATP4a; PRXR6; Flags: Precursor (At1g71695)                                                                                           | -1.517 |

|                                                      |                                                                                                                                             |                                                                                                                                                                                                            |        |
|------------------------------------------------------|---------------------------------------------------------------------------------------------------------------------------------------------|------------------------------------------------------------------------------------------------------------------------------------------------------------------------------------------------------------|--------|
| Cs1g25930                                            | K00430 peroxidase [EC:1.11.1.7]   (RefSeq) peroxidase 64-like (A)                                                                           | Peroxidase 64; Atperox P64; EC=1.11.1.7; ATP17a; PRXR4; Flags: Precursor (At5g42180)                                                                                                                       | -1.964 |
| Cs2g05220                                            | K00430 peroxidase [EC:1.11.1.7]   (RefSeq) peroxidase 19 (A)                                                                                | Peroxidase 19; Atperox P19; EC=1.11.1.7; ATP51; Flags: Precursor (At2g34060)                                                                                                                               | -3.122 |
| Cs2g28110                                            | K00430 peroxidase [EC:1.11.1.7]   (RefSeq) peroxidase P7-like (A)                                                                           | Peroxidase 4 {ECO:0000250 UniProtKB:Q42578}; EC=1.11.1.7; Flags: Precursor (At5g05340)                                                                                                                     | -1.149 |
| Cs1g21860                                            | K00430 peroxidase [EC:1.11.1.7]   (RefSeq) peroxidase 51-like (A)                                                                           | Peroxidase 73; Atperox P73; EC=1.11.1.7; ATP10a; PRXR11; Flags: Precursor (At5g67400)                                                                                                                      | -2.185 |
| Cs3g02310                                            | K00430 peroxidase [EC:1.11.1.7]   (RefSeq) lignin-forming anionic peroxidase-like (A)                                                       | Lignin-forming anionic peroxidase; EC=1.11.1.7; Flags: Precursor (At1g14550)                                                                                                                               | -2.149 |
| novel.242                                            | K00430 peroxidase [EC:1.11.1.7]   (RefSeq) peroxidase P7-like (A)                                                                           | Peroxidase 52; Atperox P52; EC=1.11.1.7; ATP49; Flags: Precursor (At5g05340)                                                                                                                               | -2.455 |
| Cs1g15010                                            | K00430 peroxidase [EC:1.11.1.7]   (RefSeq) putative Peroxidase 48 (A)                                                                       | Putative Peroxidase 48; Atperox P48; EC=1.11.1.7; Flags: Precursor (At4g33870)                                                                                                                             | -2.263 |
| Cs2g21810                                            | K00430 peroxidase [EC:1.11.1.7]   (RefSeq) peroxidase 27 (A)                                                                                | Peroxidase 27; Atperox P27; EC=1.11.1.7; ATP12a; PRXR7; Flags: Precursor (At3g01190)                                                                                                                       | -2.629 |
| orange1.1t02041                                      | K00430 peroxidase [EC:1.11.1.7]   (RefSeq) peroxidase A2 (A)                                                                                | Peroxidase C3; EC=1.11.1.7; Flags: Precursor (At5g06720)                                                                                                                                                   | -1.448 |
| Cs6g09680                                            | K00430 peroxidase [EC:1.11.1.7]   (RefSeq) cationic peroxidase 1-like (A)                                                                   | Cationic peroxidase 1; EC=1.11.1.7; PNPC1; Flags: Precursor (At5g05340)                                                                                                                                    | -2.115 |
| Cs3g27290                                            | K03781 catalase [EC:1.11.1.6]   (RefSeq) catalase isozyme 1 (A)                                                                             | Catalase isozyme 1; EC=1.11.1.6 (At4g35090)                                                                                                                                                                | 1.257  |
| Cs6g04140                                            | K00434 L-ascorbate peroxidase [EC:1.11.1.11]   (RefSeq) L-ascorbate peroxidase 2, cytosolic (A)                                             | L-ascorbate peroxidase 2, cytosolic; EC=1.11.1.11; L-ascorbate peroxidase 1b; APX1b; AtAPx02 (At3g09640)                                                                                                   | -2.405 |
| Cs6g20220                                            | --                                                                                                                                          | Gibberellin-regulated protein 14; GAST1 protein homolog 14; Flags: Precursor (At5g14920)                                                                                                                   | -3.450 |
| orange1.1t03248                                      | K17761 succinate-semialdehyde dehydrogenase, mitochondrial [EC:1.2.1.24]   (RefSeq) succinate-semialdehyde dehydrogenase, mitochondrial (A) | Succinate-semialdehyde dehydrogenase, mitochondrial; At-SSADH1; EC=1.2.1.24; Aldehyde dehydrogenase family 5 member F1; NAD(+)-dependent succinic semialdehyde dehydrogenase; Flags: Precursor (At1g79440) | 1.373  |
| Cs3g19060                                            | K10534 nitrate reductase [NAD(P)H] [EC:1.7.1.1 1.7.1.2 1.7.1.3]   (RefSeq) nitrate reductase [NAD(P)H]-like (A)                             | Nitrate reductase [NAD(P)H]; NR; EC=1.7.1.2 (At1g37130_1)                                                                                                                                                  | -2.160 |
| Cs5g18330                                            | K01381 saccharopepsin [EC:3.4.23.25]   (RefSeq) aspartic proteinase CDR1-like (A)                                                           | Aspartic proteinase CDR1; EC=3.4.23.-; Protein CONSTITUTIVE DISEASE RESISTANCE 1; Flags: Precursor (At1g64830)                                                                                             | -7.269 |
| Cs5g18300                                            | K01381 saccharopepsin [EC:3.4.23.25]   (RefSeq) aspartic proteinase CDR1-like (A)                                                           | Aspartic proteinase CDR1; EC=3.4.23.-; Protein CONSTITUTIVE DISEASE RESISTANCE 1; Flags: Precursor (At1g64830)                                                                                             | -2.890 |
|                                                      |                                                                                                                                             |                                                                                                                                                                                                            |        |
| <b>Antioxidant activity (GO:0016209, P = 0.0013)</b> |                                                                                                                                             |                                                                                                                                                                                                            |        |
| orange1.1t04722                                      | K00799 glutathione S-transferase [EC:2.5.1.18]   (RefSeq) probable glutathione S-transferase parC (A)                                       | Glutathione S-transferase U19; AtGSTU19; EC=2.5.1.18; GST class-tau member 19; Glutathione S-transferase 8 (At1g17180)                                                                                     | 13.630 |
| Cs5g03810                                            | K00799 glutathione S-transferase [EC:2.5.1.18]   (RefSeq) glutathione S-transferase T1-like (A)                                             | Glutathione S-transferase T1; AtGSTT1; EC=2.5.1.18; GST class-theta member 1; Glutathione S-transferase 10 (At5g41210)                                                                                     | 1.518  |

|                 |                                                                                                                                  |                                                                                                                                                                                                                                                                                                                                                                                                             |        |
|-----------------|----------------------------------------------------------------------------------------------------------------------------------|-------------------------------------------------------------------------------------------------------------------------------------------------------------------------------------------------------------------------------------------------------------------------------------------------------------------------------------------------------------------------------------------------------------|--------|
| Cs6g17520       | K21888 glutathione dehydrogenase/transferase [EC:1.8.5.1 2.5.1.18]   (RefSeq) glutathione S-transferase DHAR3, chloroplastic (A) | Glutathione S-transferase DHAR3, chloroplastic; EC=2.5.1.18 {ECO:0000269 PubMed:12077129}; Chloride intracellular channel homolog 3; CLIC homolog 3; Glutathione-dependent dehydroascorbate reductase 3 {ECO:0000303 PubMed:12077129}; AtDHAR3 {ECO:0000303 PubMed:12077129}; ChlDHAR; GSH-dependent dehydroascorbate reductase 3; EC=1.8.5.1 {ECO:0000269 PubMed:12077129}; Flags: Precursor (At5g16710 1) | -1.042 |
| Cs6g04560       | K00430 peroxidase [EC:1.11.1.7]   (RefSeq) peroxidase 21 (A)                                                                     | Peroxidase 21; Atperox P21; EC=1.11.1.7; ATP2a/ATP2b; PRXR5; Flags: Precursor (At2g37130)                                                                                                                                                                                                                                                                                                                   | -2.280 |
| orange1.1t02225 | K00430 peroxidase [EC:1.11.1.7]   (RefSeq) LOW QUALITY PROTEIN: peroxidase A2-like (A)                                           | Peroxidase 53; Atperox P53; EC=1.11.1.7; ATPA2; Flags: Precursor (At5g06720)                                                                                                                                                                                                                                                                                                                                | -1.825 |
| orange1.1t02046 | K00430 peroxidase [EC:1.11.1.7]   (RefSeq) peroxidase A2 (A)                                                                     | Peroxidase 15 {ECO:0000303 PubMed:17936696}; Prx15 {ECO:0000303 PubMed:17936696}; EC=1.11.1.7; Anionic peroxidase {ECO:0000303 PubMed:17936696}; Flags: Precursor (At5g06730)                                                                                                                                                                                                                               | -1.040 |
| Cs3g20770       | K00430 peroxidase [EC:1.11.1.7]   (RefSeq) peroxidase 13 (A)                                                                     | Peroxidase 13; Atperox P13; EC=1.11.1.7; Flags: Precursor (At1g77100 1)                                                                                                                                                                                                                                                                                                                                     | 8.534  |
| Cs1g19890       | K00430 peroxidase [EC:1.11.1.7]   (RefSeq) peroxidase 17 (A)                                                                     | Peroxidase 17; Atperox P17; EC=1.11.1.7; ATP25a; Flags: Precursor (At2g22420)                                                                                                                                                                                                                                                                                                                               | -1.915 |
| Cs2g21820       | K00430 peroxidase [EC:1.11.1.7]   (RefSeq) peroxidase 30 (A)                                                                     | Peroxidase 30; Atperox P30; EC=1.11.1.7; ATP7a; PRXR9; Flags: Precursor (At3g21770)                                                                                                                                                                                                                                                                                                                         | -2.920 |
| Cs5g32270       | K00430 peroxidase [EC:1.11.1.7]   (RefSeq) peroxidase 3 (A)                                                                      | Peroxidase 3; Atperox P3; EC=1.11.1.7; ATPRC; RCI3A; Rare cold-inducible protein; Flags: Precursor (At1g05260)                                                                                                                                                                                                                                                                                              | -2.477 |
| Cs1g20230       | K00430 peroxidase [EC:1.11.1.7]   (RefSeq) peroxidase 4-like (A)                                                                 | Peroxidase 4 {ECO:0000250 UniProtKB:Q42578}; EC=1.11.1.7; Flags: Precursor (At5g05340)                                                                                                                                                                                                                                                                                                                      | -2.964 |
| Cs1g24640       | K00430 peroxidase [EC:1.11.1.7]   (RefSeq) peroxidase 72 (A)                                                                     | Peroxidase 72; Atperox P72; EC=1.11.1.7; ATP6a; PRXR8; Flags: Precursor (At5g66390)                                                                                                                                                                                                                                                                                                                         | -2.627 |
| Cs2g03110       | K00430 peroxidase [EC:1.11.1.7]   (RefSeq) peroxidase 42 (A)                                                                     | Peroxidase 42; Atperox P42; EC=1.11.1.7; ATP1a/ATP1b; PRXR1; Flags: Precursor (At4g21960)                                                                                                                                                                                                                                                                                                                   | -1.812 |
| orange1.1t02045 | K00430 peroxidase [EC:1.11.1.7]   (RefSeq) peroxidase 15-like (A)                                                                | Peroxidase 15 {ECO:0000303 PubMed:17936696}; Prx15 {ECO:0000303 PubMed:17936696}; EC=1.11.1.7; Anionic peroxidase {ECO:0000303 PubMed:17936696}; Flags: Precursor (At5g06720)                                                                                                                                                                                                                               | -1.207 |
| Cs6g20170       | K00430 peroxidase [EC:1.11.1.7]   (RefSeq) peroxidase 31-like (A)                                                                | Peroxidase 63; Atperox P63; EC=1.11.1.7; ATP26a; Flags: Precursor (At5g40150)                                                                                                                                                                                                                                                                                                                               | -1.099 |
| Cs3g25300       | K00430 peroxidase [EC:1.11.1.7]   (RefSeq) peroxidase 9 (A)                                                                      | Peroxidase 9; Atperox P9; EC=1.11.1.7; ATP18a; Flags: Precursor (At1g44970)                                                                                                                                                                                                                                                                                                                                 | -2.503 |
| orange1.1t02033 | K00430 peroxidase [EC:1.11.1.7]   (RefSeq) peroxidase 59-like (A)                                                                | Peroxidase N; EC=1.11.1.7; Neutral peroxidase; Flags: Precursor (At5g19890)                                                                                                                                                                                                                                                                                                                                 | 1.411  |
| Cs7g13530       | K00430 peroxidase [EC:1.11.1.7]   (RefSeq) peroxidase 65-like (A)                                                                | Peroxidase 65; Atperox P65; EC=1.11.1.7; ATP43; Flags: Precursor (At5g47000)                                                                                                                                                                                                                                                                                                                                | -3.439 |
| Cs9g05130       | K00430 peroxidase [EC:1.11.1.7]   (RefSeq) peroxidase 3-like (A)                                                                 | Peroxidase 3; Atperox P3; EC=1.11.1.7; ATPRC; RCI3A; Rare cold-inducible protein; Flags: Precursor (At1g05260)                                                                                                                                                                                                                                                                                              | -2.828 |

|                 |                                                                                                                        |                                                                                                                                                |        |
|-----------------|------------------------------------------------------------------------------------------------------------------------|------------------------------------------------------------------------------------------------------------------------------------------------|--------|
| Cs3g26600       | K00430 peroxidase [EC:1.11.1.7]   (RefSeq) peroxidase 64 (A)                                                           | Peroxidase 64; Atperox P64; EC=1.11.1.7; ATP17a; PRXR4; Flags: Precursor (At5g42180)                                                           | -2.278 |
| orange1.1t02044 | K00430 peroxidase [EC:1.11.1.7]   (RefSeq) peroxidase E5-like (A)                                                      | Peroxidase C3; EC=1.11.1.7; Flags: Precursor (At2g38390)                                                                                       | -1.910 |
| Cs4g17860       | K00430 peroxidase [EC:1.11.1.7]   (RefSeq) peroxidase 25 (A)                                                           | Peroxidase 25; Atperox P25; EC=1.11.1.7; Flags: Precursor (At2g41480)                                                                          | 1.546  |
| Cs3g21730       | K00430 peroxidase [EC:1.11.1.7]   (RefSeq) peroxidase 12 (A)                                                           | Peroxidase 12; Atperox P12; EC=1.11.1.7; ATP4a; PRXR6; Flags: Precursor (At1g71695)                                                            | -1.517 |
| Cs1g25930       | K00430 peroxidase [EC:1.11.1.7]   (RefSeq) peroxidase 64-like (A)                                                      | Peroxidase 64; Atperox P64; EC=1.11.1.7; ATP17a; PRXR4; Flags: Precursor (At5g42180)                                                           | -1.964 |
| Cs2g05220       | K00430 peroxidase [EC:1.11.1.7]   (RefSeq) peroxidase 19 (A)                                                           | Peroxidase 19; Atperox P19; EC=1.11.1.7; ATP51; Flags: Precursor (At2g34060)                                                                   | -3.122 |
| Cs2g28110       | K00430 peroxidase [EC:1.11.1.7]   (RefSeq) peroxidase P7-like (A)                                                      | Peroxidase 4 {ECO:0000250 UniProtKB:Q42578}; EC=1.11.1.7; Flags: Precursor (At5g05340)                                                         | -1.149 |
| Cs1g21860       | K00430 peroxidase [EC:1.11.1.7]   (RefSeq) peroxidase 51-like (A)                                                      | s 73; Atperox P73; EC=1.11.1.7; ATP10a; PRXR11; Flags: Precursor (At5g67400)                                                                   | -2.185 |
| Cs3g02310       | K00430 peroxidase [EC:1.11.1.7]   (RefSeq) lignin-forming anionic peroxidase-like (A)                                  | Lignin-forming anionic peroxidase; EC=1.11.1.7; Flags: Precursor (At1g14550)                                                                   | -2.149 |
| novel.242       | K00430 peroxidase [EC:1.11.1.7]   (RefSeq) peroxidase P7-like (A)                                                      | Peroxidase 52; Atperox P52; EC=1.11.1.7; ATP49; Flags: Precursor (At5g05340)                                                                   | -2.455 |
| Cs1g15010       | K00430 peroxidase [EC:1.11.1.7]   (RefSeq) putative Peroxidase 48 (A)                                                  | Putative Peroxidase 48; Atperox P48; EC=1.11.1.7; Flags: Precursor (At4g33870)                                                                 | -2.263 |
| Cs2g21810       | K00430 peroxidase [EC:1.11.1.7]   (RefSeq) peroxidase 27 (A)                                                           | Peroxidase 27; Atperox P27; EC=1.11.1.7; ATP12a; PRXR7; Flags: Precursor (At3g01190)                                                           | -2.629 |
| orange1.1t02041 | K00430 peroxidase [EC:1.11.1.7]   (RefSeq) peroxidase A2 (A)                                                           | Peroxidase C3; EC=1.11.1.7; Flags: Precursor (At5g06720)                                                                                       | -1.448 |
| Cs6g09680       | K00430 peroxidase [EC:1.11.1.7]   (RefSeq) cationic peroxidase 1-like (A)                                              | Cationic peroxidase 1; EC=1.11.1.7; PNPC1; Flags: Precursor (At5g05340)                                                                        | -2.115 |
| Cs3g27290       | K03781 catalase [EC:1.11.1.6]   (RefSeq) catalase isozyme 1 (A)                                                        | Catalase isozyme 1; EC=1.11.1.6 (At4g35090)                                                                                                    | 1.257  |
| Cs6g04140       | K00434 L-ascorbate peroxidase [EC:1.11.1.11]   (RefSeq) L-ascorbate peroxidase 2, cytosolic (A)                        | L-ascorbate peroxidase 2, cytosolic; EC=1.11.1.11; L-ascorbate peroxidase 1b; APX1b; AtAPx02 (At3g09640)                                       | -2.405 |
| Cs4g12290       | K03671 thioredoxin 1   (RefSeq) ATC; thioredoxin-like protein CXXS1 (A)                                                | Thioredoxin-like protein CXXS1; AtCXXS1; Mono-cysteine thioredoxin 1 (At1g11530)                                                               | -2.408 |
| novel.84        | --                                                                                                                     | Thioredoxin-like protein CDSP32, chloroplastic; Chloroplastic drought-induced stress protein of 32 KDa; AtCDSP32; Flags: Precursor (At1g76080) | 1.132  |
| Cs6g04000       | --                                                                                                                     | Thioredoxin-like protein AAED1, chloroplastic; AhpC/TSA antioxidant enzyme domain-containing protein 1; Flags: Precursor (At2g37240)           | 1.058  |
| Cs7g23190       | K17098 annexin D   (RefSeq) LOW QUALITY PROTEIN: annexin D1-like (A)                                                   | Annexin D1; AnnAt1; Annexin A1 (At1g35720)                                                                                                     | -1.239 |
| Cs6g01660       | --                                                                                                                     | Nectarin-1; EC=1.15.1.1; Superoxide dismutase [Mn]; Flags: Precursor (At1g09560)                                                               | -1.175 |
| Cs5g11890       | K13447 respiratory burst oxidase [EC:1.6.3.- 1.11.1.-]   (RefSeq) respiratory burst oxidase homolog protein A-like (A) | Respiratory burst oxidase homolog protein A; EC=1.11.1.-; EC=1.6.3.-; NADPH oxidase RBOHA; StRBOHA (At5g47910)                                 | -1.724 |

|                                                              |                                                                                                                                     |                                                                                                                                                                                                                                                                                                                                                                                    |        |
|--------------------------------------------------------------|-------------------------------------------------------------------------------------------------------------------------------------|------------------------------------------------------------------------------------------------------------------------------------------------------------------------------------------------------------------------------------------------------------------------------------------------------------------------------------------------------------------------------------|--------|
| Cs7g29170                                                    | K03283 heat shock 70kDa protein 1/2/6/8   (RefSeq) heat shock 70 kDa protein 18-like (A)                                            | Probable nucleoredoxin 1-2; OsNrx1-2; EC=1.8.1.8 (At2g16050)                                                                                                                                                                                                                                                                                                                       | 1.561  |
|                                                              |                                                                                                                                     |                                                                                                                                                                                                                                                                                                                                                                                    |        |
| <b>Response to oxidative stress (GO:0006979, P = 0.0024)</b> |                                                                                                                                     |                                                                                                                                                                                                                                                                                                                                                                                    |        |
| Cs6g21640                                                    | K09286 EREBP-like factor   (RefSeq) dehydration-responsive element-binding protein 2B (A)                                           | Ethylene-responsive transcription factor RAP2-11; Protein RELATED TO APETALA2 11 (At5g19790)                                                                                                                                                                                                                                                                                       | 5.391  |
| novel.2184                                                   | K09580 protein disulfide-isomerase A1 [EC:5.3.4.1]   (RefSeq) protein disulfide isomerase-like 1-4 (A)                              | Protein disulfide isomerase-like 1-4; AtPDIL1-4; EC=5.3.4.1; Protein disulfide isomerase 2; AtPDI2; Protein disulfide isomerase-like 2-2; AtPDIL2-2; Flags: Precursor (At5g60640)                                                                                                                                                                                                  | 6.250  |
| novel.962                                                    | K09286 EREBP-like factor   (RefSeq) ethylene-responsive transcription factor ERF027-like (A)                                        | Ethylene-responsive transcription factor RAP2-11; Protein RELATED TO APETALA2 11 (At5g19790)                                                                                                                                                                                                                                                                                       | 5.266  |
| Cs9g03110                                                    | K09286 EREBP-like factor   (RefSeq) ethylene-responsive transcription factor RAP2-11 (A)                                            | Ethylene-responsive transcription factor RAP2-11; Protein RELATED TO APETALA2 11 (At5g19790)                                                                                                                                                                                                                                                                                       | 6.195  |
| Cs5g01140                                                    | K09286 EREBP-like factor   (RefSeq) uncharacterized protein LOC112499022 (A)                                                        | Ethylene-responsive transcription factor RAP2-11; Protein RELATED TO APETALA2 11 (At5g19790)                                                                                                                                                                                                                                                                                       | 3.605  |
| orange1.1t00299                                              | K09286 EREBP-like factor   (RefSeq) ethylene-responsive transcription factor ERF027-like (A)                                        | Ethylene-responsive transcription factor RAP2-11; Protein RELATED TO APETALA2 11 (At5g19790)                                                                                                                                                                                                                                                                                       | 5.600  |
| orange1.1t04722                                              | K00799 glutathione S-transferase [EC:2.5.1.18]   (RefSeq) probable glutathione S-transferase parC (A)                               | Glutathione S-transferase U19; AtGSTU19; EC=2.5.1.18; GST class-tau member 19; Glutathione S-transferase 8 (At1g17180)                                                                                                                                                                                                                                                             | 13.630 |
| Cs7g01770                                                    | --                                                                                                                                  | Protein DETOXIFICATION 43 {ECO:0000303 PubMed:11739388}; AtDTX43 {ECO:0000303 PubMed:11739388}; Multidrug and toxic compound extrusion protein 43 {ECO:0000305}; MATE protein 43 {ECO:0000305}; Protein FERRIC REDUCTASE DEFECTIVE 3 {ECO:0000303 PubMed:12172022}; AtFRD3 {ECO:0000303 PubMed:12172022}; Protein MANGANESE ACCUMULATOR 1 {ECO:0000303 PubMed:8754685} (At3g08040) | -2.485 |
| Cs7g32260                                                    | K13993 HSP20 family protein   (RefSeq) 18.1 kDa class I heat shock protein-like (A)                                                 | 18.1 kDa class I heat shock protein; 18.1 kDa heat shock protein; AtHsp18.1 (At5g59720)                                                                                                                                                                                                                                                                                            | 4.455  |
| Cs2g18580                                                    | K18121 glyoxylate/succinic semialdehyde reductase [EC:1.1.1.79 1.1.1.-]   (RefSeq) glyoxylate/succinic semialdehyde reductase 1 (A) | Glyoxylate/succinic semialdehyde reductase 1; AtGLYR1; AtGR1; SSA reductase 1; EC=1.1.1.79 {ECO:0000269 Ref.7, ECO:0000269 Ref.8}; EC=1.1.1.n11 {ECO:0000269 Ref.7, ECO:0000269 Ref.8}; Gamma-hydroxybutyrate dehydrogenase {ECO:0000303 PubMed:12882961}; AtGHBDH (At3g25530)                                                                                                     | 2.453  |
| Cs6g04560                                                    | K00430 peroxidase [EC:1.11.1.7]   (RefSeq) peroxidase 21 (A)                                                                        | Peroxidase 21; Atperox P21; EC=1.11.1.7; ATP2a/ATP2b; PRXR5; Flags: Precursor (At2g37130)                                                                                                                                                                                                                                                                                          | -2.280 |
| orange1.1t02225                                              | K00430 peroxidase [EC:1.11.1.7]   (RefSeq) LOW QUALITY PROTEIN: peroxidase A2-like (A)                                              | Peroxidase 53; Atperox P53; EC=1.11.1.7; ATPA2; Flags: Precursor (At5g06720)                                                                                                                                                                                                                                                                                                       | -1.825 |
| Cs3g20770                                                    | K00430 peroxidase [EC:1.11.1.7]   (RefSeq) peroxidase 13 (A)                                                                        | Peroxidase 13; Atperox P13; EC=1.11.1.7; Flags: Precursor (At1g77100_1)                                                                                                                                                                                                                                                                                                            | 8.534  |

|                 |                                                                   |                                                                                                                                                                               |        |
|-----------------|-------------------------------------------------------------------|-------------------------------------------------------------------------------------------------------------------------------------------------------------------------------|--------|
| orange1.1t02046 | K00430 peroxidase [EC:1.11.1.7]   (RefSeq) peroxidase A2 (A)      | Peroxidase 15 {ECO:0000303 PubMed:17936696}; Prx15 {ECO:0000303 PubMed:17936696}; EC=1.11.1.7; Anionic peroxidase {ECO:0000303 PubMed:17936696}; Flags: Precursor (At5g06730) | -1.040 |
| Cs1g19890       | K00430 peroxidase [EC:1.11.1.7]   (RefSeq) peroxidase 17 (A)      | Peroxidase 17; Atperox P17; EC=1.11.1.7; ATP25a; Flags: Precursor (At2g22420)                                                                                                 | -1.915 |
| Cs2g21820       | K00430 peroxidase [EC:1.11.1.7]   (RefSeq) peroxidase 30 (A)      | Peroxidase 30; Atperox P30; EC=1.11.1.7; ATP7a; PRXR9; Flags: Precursor (At3g21770)                                                                                           | -2.920 |
| Cs5g32270       | K00430 peroxidase [EC:1.11.1.7]   (RefSeq) peroxidase 3 (A)       | Peroxidase 3; Atperox P3; EC=1.11.1.7; ATPRC; RCI3A; Rare cold-inducible protein; Flags: Precursor (At1g05260)                                                                | -2.477 |
| Cs1g20230       | K00430 peroxidase [EC:1.11.1.7]   (RefSeq) peroxidase 4-like (A)  | Peroxidase 4 {ECO:0000250 UniProtKB:Q42578}; EC=1.11.1.7; Flags: Precursor (At5g05340)                                                                                        | -2.964 |
| Cs1g24640       | K00430 peroxidase [EC:1.11.1.7]   (RefSeq) peroxidase 72 (A)      | Peroxidase 72; Atperox P72; EC=1.11.1.7; ATP6a; PRXR8; Flags: Precursor (At5g66390)                                                                                           | -2.627 |
| Cs2g03110       | K00430 peroxidase [EC:1.11.1.7]   (RefSeq) peroxidase 42 (A)      | Peroxidase 42; Atperox P42; EC=1.11.1.7; ATP1a/ATP1b; PRXR1; Flags: Precursor (At4g21960)                                                                                     | -1.812 |
| orange1.1t02045 | K00430 peroxidase [EC:1.11.1.7]   (RefSeq) peroxidase 15-like (A) | Peroxidase 15 {ECO:0000303 PubMed:17936696}; Prx15 {ECO:0000303 PubMed:17936696}; EC=1.11.1.7; Anionic peroxidase {ECO:0000303 PubMed:17936696}; Flags: Precursor (At5g06720) | -1.207 |
| Cs6g20170       | K00430 peroxidase [EC:1.11.1.7]   (RefSeq) peroxidase 31-like (A) | Peroxidase 63; Atperox P63; EC=1.11.1.7; ATP26a; Flags: Precursor (At5g40150)                                                                                                 | -1.099 |
| Cs3g25300       | K00430 peroxidase [EC:1.11.1.7]   (RefSeq) peroxidase 9 (A)       | Peroxidase 9; Atperox P9; EC=1.11.1.7; ATP18a; Flags: Precursor (At1g44970)                                                                                                   | -2.503 |
| orange1.1t02033 | K00430 peroxidase [EC:1.11.1.7]   (RefSeq) peroxidase 59-like (A) | Peroxidase N; EC=1.11.1.7; Neutral peroxidase; Flags: Precursor (At5g19890)                                                                                                   | 1.411  |
| Cs7g13530       | K00430 peroxidase [EC:1.11.1.7]   (RefSeq) peroxidase 65-like (A) | Peroxidase 65; Atperox P65; EC=1.11.1.7; ATP43; Flags: Precursor (At5g47000)                                                                                                  | -3.439 |
| Cs9g05130       | K00430 peroxidase [EC:1.11.1.7]   (RefSeq) peroxidase 3-like (A)  | Peroxidase 3; Atperox P3; EC=1.11.1.7; ATPRC; RCI3A; Rare cold-inducible protein; Flags: Precursor (At1g05260)                                                                | -2.828 |
| Cs3g26600       | K00430 peroxidase [EC:1.11.1.7]   (RefSeq) peroxidase 64 (A)      | Peroxidase 64; Atperox P64; EC=1.11.1.7; ATP17a; PRXR4; Flags: Precursor (At5g42180)                                                                                          | -2.278 |
| orange1.1t02044 | K00430 peroxidase [EC:1.11.1.7]   (RefSeq) peroxidase E5-like (A) | Peroxidase C3; EC=1.11.1.7; Flags: Precursor (At2g38390)                                                                                                                      | -1.910 |
| Cs4g17860       | K00430 peroxidase [EC:1.11.1.7]   (RefSeq) peroxidase 25 (A)      | Peroxidase 25; Atperox P25; EC=1.11.1.7; Flags: Precursor (At2g41480)                                                                                                         | 1.546  |
| Cs3g21730       | K00430 peroxidase [EC:1.11.1.7]   (RefSeq) peroxidase 12 (A)      | Peroxidase 12; Atperox P12; EC=1.11.1.7; ATP4a; PRXR6; Flags: Precursor (At1g71695)                                                                                           | -1.517 |
| Cs1g25930       | K00430 peroxidase [EC:1.11.1.7]   (RefSeq) peroxidase 64-like (A) | Peroxidase 64; Atperox P64; EC=1.11.1.7; ATP17a; PRXR4; Flags: Precursor (At5g42180)                                                                                          | -1.964 |
| Cs2g05220       | K00430 peroxidase [EC:1.11.1.7]   (RefSeq) peroxidase 19 (A)      | Peroxidase 19; Atperox P19; EC=1.11.1.7; ATP51; Flags: Precursor (At2g34060)                                                                                                  | -3.122 |
| Cs2g28110       | K00430 peroxidase [EC:1.11.1.7]   (RefSeq) peroxidase P7-like (A) | Peroxidase 4 {ECO:0000250 UniProtKB:Q42578}; EC=1.11.1.7; Flags: Precursor (At5g05340)                                                                                        | -1.149 |
| Cs1g21860       | K00430 peroxidase [EC:1.11.1.7]   (RefSeq) peroxidase 51-like (A) | Peroxidase 73; Atperox P73; EC=1.11.1.7; ATP10a; PRXR11; Flags: Precursor (At5g67400)                                                                                         | -2.185 |

|                 |                                                                                                                                                                         |                                                                                                                                                                                                                                                                                                                   |        |
|-----------------|-------------------------------------------------------------------------------------------------------------------------------------------------------------------------|-------------------------------------------------------------------------------------------------------------------------------------------------------------------------------------------------------------------------------------------------------------------------------------------------------------------|--------|
| Cs3g02310       | K00430 peroxidase [EC:1.11.1.7]   (RefSeq) lignin-forming anionic peroxidase-like (A)                                                                                   | Lignin-forming anionic peroxidase; EC=1.11.1.7; Flags: Precursor (At1g14550)                                                                                                                                                                                                                                      | -2.149 |
| novel.242       | K00430 peroxidase [EC:1.11.1.7]   (RefSeq) peroxidase P7-like (A)                                                                                                       | Peroxidase 52; Atperox P52; EC=1.11.1.7; ATP49; Flags: Precursor (At5g05340)                                                                                                                                                                                                                                      | -2.455 |
| Cs1g15010       | K00430 peroxidase [EC:1.11.1.7]   (RefSeq) putative Peroxidase 48 (A)                                                                                                   | Putative Peroxidase 48; Atperox P48; EC=1.11.1.7; Flags: Precursor (At4g33870)                                                                                                                                                                                                                                    | -2.263 |
| Cs2g21810       | K00430 peroxidase [EC:1.11.1.7]   (RefSeq) peroxidase 27 (A)                                                                                                            | Peroxidase 27; Atperox P27; EC=1.11.1.7; ATP12a; PRXR7; Flags: Precursor (At3g01190)                                                                                                                                                                                                                              | -2.629 |
| orange1.1t02041 | K00430 peroxidase [EC:1.11.1.7]   (RefSeq) peroxidase A2 (A)                                                                                                            | Peroxidase C3; EC=1.11.1.7; Flags: Precursor (At5g06720)                                                                                                                                                                                                                                                          | -1.448 |
| Cs6g09680       | K00430 peroxidase [EC:1.11.1.7]   (RefSeq) cationic peroxidase 1-like (A)                                                                                               | Cationic peroxidase 1; EC=1.11.1.7; PNPC1; Flags: Precursor (At5g05340)                                                                                                                                                                                                                                           | -2.115 |
| Cs2g17130       | --                                                                                                                                                                      | Protein PLANT CADMIUM RESISTANCE 2; AtPCR2 (At1g14870)                                                                                                                                                                                                                                                            | -4.251 |
| novel.2159      | K09580 protein disulfide-isomerase A1 [EC:5.3.4.1]   (RefSeq) protein disulfide isomerase-like 1-4 (A)                                                                  | Protein disulfide isomerase-like 1-4; AtPDIL1-4; EC=5.3.4.1; Protein disulfide isomerase 2; AtPDI2; Protein disulfide isomerase-like 2-2; AtPDIL2-2; Flags: Precursor (At5g60640)                                                                                                                                 | 8.889  |
| Cs3g27290       | K03781 catalase [EC:1.11.1.6]   (RefSeq) catalase isozyme 1 (A)                                                                                                         | Catalase isozyme 1; EC=1.11.1.6 (At4g35090)                                                                                                                                                                                                                                                                       | 1.257  |
| Cs2g23790       | K13691 pathogen-inducible salicylic acid glucosyltransferase [EC:2.4.1.-]   (RefSeq) UDP-glycosyltransferase 74E2-like (A)                                              | UDP-glycosyltransferase 74E2; EC=2.4.1.- (At1g05680)                                                                                                                                                                                                                                                              | 3.046  |
| Cs6g04140       | K00434 L-ascorbate peroxidase [EC:1.11.1.11]   (RefSeq) L-ascorbate peroxidase 2, cytosolic (A)                                                                         | L-ascorbate peroxidase 2, cytosolic; EC=1.11.1.11; L-ascorbate peroxidase 1b; APX1b; AtAPx02 (At3g09640)                                                                                                                                                                                                          | -2.405 |
| orange1.1t05657 | K13691 pathogen-inducible salicylic acid glucosyltransferase [EC:2.4.1.-]   (RefSeq) UDP-glycosyltransferase 74E2-like (A)                                              | UDP-glycosyltransferase 74E2; EC=2.4.1.- (At1g05680)                                                                                                                                                                                                                                                              | 1.776  |
| Cs9g08030       | --                                                                                                                                                                      | Photosynthetic NDH subunit of subcomplex B 5, chloroplastic {ECO:0000303 PubMed:21785130}; Protein PnsB5 {ECO:0000303 PubMed:21785130}; NAD(P)H dehydrogenase 18 {ECO:0000312 EMBL:AED95005.1}; Flags: Precursor (At5g43750)                                                                                      | 4.168  |
| Cs8g15600       | K13422 transcription factor MYC2   (RefSeq) transcription factor MYC2-like (A)                                                                                          | Transcription factor FER-LIKE IRON DEFICIENCY-INDUCED TRANSCRIPTION FACTOR; Basic helix-loop-helix protein 29; AtbHLH29; bHLH 29; FER-LIKE REGULATOR OF IRON UPTAKE; Transcription factor EN 43; Transcription factor Fe-DEFICIENCY INDUCED TRANSCRIPTION FACTOR 1; bHLH transcription factor bHLH029 (At2g28160) | -2.413 |
| Cs6g16020       | K13416 brassinosteroid insensitive 1-associated receptor kinase 1 [EC:2.7.10.1 2.7.11.1]   (RefSeq) BRASSINOSTEROID INSENSITIVE 1-associated receptor kinase 1-like (A) | Cysteine-rich receptor-like protein kinase 2; Cysteine-rich RLK2; EC=2.7.11.-; Flags: Precursor (At1g70520)                                                                                                                                                                                                       | 3.146  |
| Cs9g11110       | K08869 aarF domain-containing kinase   (RefSeq) uncharacterized protein sl10005 (A)                                                                                     | Protein ACTIVITY OF BC1 COMPLEX KINASE 3, chloroplastic {ECO:0000303 PubMed:23673981}; ABC1-LIKE KINASE 3 {ECO:0000303 PubMed:23673981}; EC=2.7.-.- {ECO:0000255 PROSITE-ProRule:PRU00159}; EC=2.7.11.1 {ECO:0000269 PubMed:23632854}; Protein                                                                    | 1.443  |

|            |                                                                                                                             |                                                                                                                                                                                                                                                                                                     |        |
|------------|-----------------------------------------------------------------------------------------------------------------------------|-----------------------------------------------------------------------------------------------------------------------------------------------------------------------------------------------------------------------------------------------------------------------------------------------------|--------|
|            |                                                                                                                             | REPRESSOR OF BDR1 {ECO:0000303 PubMed:25882344}; Flags: Precursor (At3g24190)                                                                                                                                                                                                                       |        |
| Cs4g12540  | K06892 feruloyl-CoA ortho-hydroxylase [EC:1.14.11.-]   (RefSeq) feruloyl CoA ortho-hydroxylase 1 (A)                        | Feruloyl CoA ortho-hydroxylase 1; EC=1.14.11.- (At3g12900)                                                                                                                                                                                                                                          | -2.707 |
| Cs4g06020  | K22048 mechanosensitive ion channel protein 4/5/6/7/8/9/10   (RefSeq) mechanosensitive ion channel protein 10-like (A)      | Mechanosensitive ion channel protein 10; Mechanosensitive channel of small conductance-like 10; MscS-Like protein 10; AtMSL10 (At5g12080)                                                                                                                                                           | -4.167 |
| novel.1531 | K13993 HSP20 family protein   (RefSeq) 17.3 kDa class I heat shock protein-like (A)                                         | 17.8 kDa class I heat shock protein; 17.8 kDa heat shock protein; AtHsp17.8 (At1g07400)                                                                                                                                                                                                             | 5.823  |
| Cs5g26770  | K09286 EREBP-like factor   (RefSeq) ethylene-responsive transcription factor RAP2-11 (A)                                    | Ethylene-responsive transcription factor RAP2-11; Protein RELATED TO APETALA2 11 (At5g19790)                                                                                                                                                                                                        | 1.690  |
| Cs1g03700  | K22048 mechanosensitive ion channel protein 4/5/6/7/8/9/10   (RefSeq) mechanosensitive ion channel protein 10-like (A)      | Mechanosensitive ion channel protein 10; Mechanosensitive channel of small conductance-like 10; MscS-Like protein 10; AtMSL10 (At5g12080)                                                                                                                                                           | -1.885 |
| Cs9g12460  | K06617 raffinose synthase [EC:2.4.1.82]   (RefSeq) probable galactinol--sucrose galactosyltransferase 2 (A)                 | Probable galactinol--sucrose galactosyltransferase 2; EC=2.4.1.82; Protein SEED IMBIBITION 2; Raffinose synthase 2 (At3g57520)                                                                                                                                                                      | 1.523  |
| Cs5g06440  | K06617 raffinose synthase [EC:2.4.1.82]   (RefSeq) probable galactinol--sucrose galactosyltransferase 2 (A)                 | Probable galactinol--sucrose galactosyltransferase 2; EC=2.4.1.82; Protein SEED IMBIBITION 2; Raffinose synthase 2 (At3g57520)                                                                                                                                                                      | -2.473 |
| Cs9g05400  | K07305 peptide-methionine (R)-S-oxide reductase [EC:1.8.4.12]   (RefSeq) peptide methionine sulfoxide reductase B5-like (A) | Peptide methionine sulfoxide reductase B5; OsMSRB5; EC=1.8.4.12; Peptide-methionine (R)-S-oxide reductase (At4g04830)                                                                                                                                                                               | 1.044  |
| Cs6g18900  | K10525 allene oxide cyclase [EC:5.3.99.6]   (RefSeq) allene oxide cyclase 4, chloroplastic (A)                              | Allene oxide cyclase, chloroplastic {ECO:0000303 Ref.1, ECO:0000303 Ref.2}; OsAOC {ECO:0000303 Ref.1}; EC=5.3.99.6 {ECO:0000269 PubMed:23347338}; Protein COLEOPTILE PHOTOMORPHOGENESIS 2 {ECO:0000303 PubMed:23347338}; Protein HEBIBA {ECO:0000303 PubMed:14605232}; Flags: Precursor (At1g13280) | -1.303 |
| Cs6g18910  | K10525 allene oxide cyclase [EC:5.3.99.6]   (RefSeq) allene oxide cyclase 4, chloroplastic-like (A)                         | Allene oxide cyclase, chloroplastic {ECO:0000303 Ref.1, ECO:0000303 Ref.2}; OsAOC {ECO:0000303 Ref.1}; EC=5.3.99.6 {ECO:0000269 PubMed:23347338}; Protein COLEOPTILE PHOTOMORPHOGENESIS 2 {ECO:0000303 PubMed:23347338}; Protein HEBIBA {ECO:0000303 PubMed:14605232}; Flags: Precursor (At1g13280) | -1.772 |
| Cs4g12290  | K03671 thioredoxin 1   (RefSeq) ATC; thioredoxin-like protein CXXS1 (A)                                                     | Thioredoxin-like protein CXXS1; AtCXXS1; Mono-cysteine thioredoxin 1 (At1g11530)                                                                                                                                                                                                                    | -2.408 |
| novel.2517 | K10525 allene oxide cyclase [EC:5.3.99.6]   (RefSeq) allene oxide cyclase 4, chloroplastic-like (A)                         | Allene oxide cyclase, chloroplastic {ECO:0000303 Ref.1, ECO:0000303 Ref.2}; OsAOC {ECO:0000303 Ref.1}; EC=5.3.99.6 {ECO:0000269 PubMed:23347338}; Protein COLEOPTILE PHOTOMORPHOGENESIS 2 {ECO:0000303 PubMed:23347338}; Protein HEBIBA {ECO:0000303 PubMed:14605232}; Flags: Precursor (At1g13280) | -2.188 |
| novel.84   | --                                                                                                                          | Thioredoxin-like protein CDSP32, chloroplastic; Chloroplastic drought-induced stress protein of 32 KDa; AtCDSP32; Flags: Precursor (At1g76080)                                                                                                                                                      | 1.132  |

|                                                        |                                                                                                                             |                                                                                                                                                                                                                                                                                                     |        |
|--------------------------------------------------------|-----------------------------------------------------------------------------------------------------------------------------|-----------------------------------------------------------------------------------------------------------------------------------------------------------------------------------------------------------------------------------------------------------------------------------------------------|--------|
| novel.1931                                             | --                                                                                                                          | BTB/POZ and TAZ domain-containing protein 3; BTB and TAZ domain protein 3 (At1g05690)                                                                                                                                                                                                               | -1.468 |
| Cs2g19230                                              | K03574 8-oxo-dGTP diphosphatase [EC:3.6.1.55]   (RefSeq) nudix hydrolase 1 (A)                                              | Nudix hydrolase 2; AtNUDT2; EC=3.6.1.-; ADP-ribose pyrophosphatase; EC=3.6.1.13; NADH pyrophosphatase; EC=3.6.1.22 (At5g47650)                                                                                                                                                                      | 1.172  |
| Cs2g18250                                              | K13691 pathogen-inducible salicylic acid glucosyltransferase [EC:2.4.1.-]   (RefSeq) UGT3; UDP-glycosyltransferase 74G1 (A) | UDP-glycosyltransferase 74E2; EC=2.4.1.- (At1g05680)                                                                                                                                                                                                                                                | -1.661 |
| Cs6g07040                                              | --                                                                                                                          | Protein RETICULATA, chloroplastic {ECO:0000303 PubMed:16873448}; Protein LOWER CELL DENSITY 1 {ECO:0000303 PubMed:12848826}; Flags: Precursor (At2g37860)                                                                                                                                           | -1.434 |
| Cs2g27610                                              | K06617 raffinose synthase [EC:2.4.1.82]   (RefSeq) probable galactinol--sucrose galactosyltransferase 5 (A)                 | Probable galactinol--sucrose galactosyltransferase 5; EC=2.4.1.82; Protein SEED IMBIBITION 1-LIKE; Raffinose synthase 5 (At5g40390)                                                                                                                                                                 | -2.014 |
| Cs2g17170                                              | --                                                                                                                          | Protein PLANT CADMIUM RESISTANCE 2; AtPCR2 (At1g14870)                                                                                                                                                                                                                                              | -2.283 |
| Cs3g06080                                              | K10525 allene oxide cyclase [EC:5.3.99.6]   (RefSeq) allene oxide cyclase 4, chloroplastic-like (A)                         | Allene oxide cyclase, chloroplastic {ECO:0000303 Ref.1, ECO:0000303 Ref.2}; OsAOC {ECO:0000303 Ref.1}; EC=5.3.99.6 {ECO:0000269 PubMed:23347338}; Protein COLEOPTILE PHOTOMORPHOGENESIS 2 {ECO:0000303 PubMed:23347338}; Protein HEBIBA {ECO:0000303 PubMed:14605232}; Flags: Precursor (At1g13280) | -3.385 |
| orange1.1t03701                                        | K13457 disease resistance protein RPM1   (RefSeq) disease resistance protein RPM1-like (A)                                  | Putative disease resistance protein At4g11170 (At5g17680)                                                                                                                                                                                                                                           | 1.095  |
| Cs1g21740                                              | K04498 E1A/CREB-binding protein [EC:2.3.1.48]   (RefSeq) histone acetyltransferase HAC1-like (A)                            | BTB/POZ and TAZ domain-containing protein 4; BTB and TAZ domain protein 4 (At5g67480)                                                                                                                                                                                                               | 1.117  |
| Cs2g03330                                              | --                                                                                                                          | VQ motif-containing protein 10 {ECO:0000303 PubMed:22535423}; AtVQ10 {ECO:0000303 PubMed:22535423}; Tobacco rattle virus-induced protein variant 1 {ECO:0000312 EMBL:AAV69753.1} (At1g78410)                                                                                                        | -2.524 |
| novel.1617                                             | --                                                                                                                          | Protein GRIM REAPER {ECO:0000303 PubMed:19279211}; Stigma-specific STIG1-like protein GRI {ECO:0000303 PubMed:19279211}; Contains: GRIP {ECO:0000303 PubMed:25398910}; Flags: Precursor (At1g53130)                                                                                                 | -2.523 |
| Cs4g12530                                              | K06892 feruloyl-CoA ortho-hydroxylase [EC:1.14.11.-]   (RefSeq) feruloyl CoA ortho-hydroxylase 1 (A)                        | Feruloyl CoA ortho-hydroxylase 1; EC=1.14.11.- (At3g12900)                                                                                                                                                                                                                                          | 2.579  |
| novel.2234                                             | --                                                                                                                          | BTB/POZ and TAZ domain-containing protein 3; BTB and TAZ domain protein 3 (At1g05690)                                                                                                                                                                                                               | -2.231 |
| <b>Cell redox homeostasis (GO:0045454, P = 0.7277)</b> |                                                                                                                             |                                                                                                                                                                                                                                                                                                     |        |
| novel.2184                                             | K09580 protein disulfide-isomerase A1 [EC:5.3.4.1]   (RefSeq) protein disulfide isomerase-like 1-4 (A)                      | Protein disulfide isomerase-like 1-4; AtPDIL1-4; EC=5.3.4.1; Protein disulfide isomerase 2; AtPDI2; Protein disulfide isomerase-like 2-2; AtPDIL2-2; Flags: Precursor (At5g60640)                                                                                                                   | 6.250  |

|                 |                                                                                                                                |                                                                                                                                                                                                                                                                                                                              |        |
|-----------------|--------------------------------------------------------------------------------------------------------------------------------|------------------------------------------------------------------------------------------------------------------------------------------------------------------------------------------------------------------------------------------------------------------------------------------------------------------------------|--------|
| orange1.1t03984 | K09580 protein disulfide-isomerase A1 [EC:5.3.4.1]   (RefSeq) protein disulfide isomerase-like 1-4 (A)                         | Protein disulfide isomerase-like 1-3; AtPDIL1-3; EC=5.3.4.1; Protein disulfide isomerase 1; AtPDI1; Protein disulfide isomerase-like 2-1; AtPDIL2-1; Flags: Precursor (At5g60640)                                                                                                                                            | 7.310  |
| Cs9g02470       | K00382 dihydrolipoamide dehydrogenase [EC:1.8.1.4]   (RefSeq) dihydrolipoamide dehydrogenase 2, chloroplastic-like (A)         | Dihydrolipoamide dehydrogenase 1, chloroplastic; ptLPD1; EC=1.8.1.4; Dihydrolipoamide dehydrogenase 1; Protein LIPOAMIDE DEHYDROGENASE 1; Pyruvate dehydrogenase complex E3 subunit 1; E3-1; PDC-E3 1; Flags: Precursor (At3g16950)                                                                                          | 2.130  |
| Cs4g10150       | K05907 adenylyl-sulfate reductase (glutathione) [EC:1.8.4.9]   (RefSeq) 5'-adenylylsulfate reductase 3, chloroplastic-like (A) | 5'-adenylylsulfate reductase 3, chloroplastic; EC=1.8.4.9; 3'-phosphoadenosine-5'-phosphosulfate reductase homolog 26; PAPS reductase homolog 26; Prh-26; Adenosine 5'-phosphosulfate 5'-adenylylsulfate sulfotransferase 3; APS sulfotransferase 3; Thioredoxin-independent APS reductase 3; Flags: Precursor (At4g21990_1) | 9.912  |
| orange1.1t03989 | K09580 protein disulfide-isomerase A1 [EC:5.3.4.1]   (RefSeq) protein disulfide isomerase-like 1-4 (A)                         | Protein disulfide isomerase-like 1-3; AtPDIL1-3; EC=5.3.4.1; Protein disulfide isomerase 1; AtPDI1; Protein disulfide isomerase-like 2-1; AtPDIL2-1; Flags: Precursor (At3g54960)                                                                                                                                            | 6.084  |
| orange1.1t04199 | K09580 protein disulfide-isomerase A1 [EC:5.3.4.1]   (RefSeq) protein disulfide isomerase-like 1-4 (A)                         | Protein disulfide isomerase-like 1-3; AtPDIL1-3; EC=5.3.4.1; Protein disulfide isomerase 1; AtPDI1; Protein disulfide isomerase-like 2-1; AtPDIL2-1; Flags: Precursor (At3g54960)                                                                                                                                            | 6.809  |
| novel.2159      | K09580 protein disulfide-isomerase A1 [EC:5.3.4.1]   (RefSeq) protein disulfide isomerase-like 1-4 (A)                         | Protein disulfide isomerase-like 1-4; AtPDIL1-4; EC=5.3.4.1; Protein disulfide isomerase 2; AtPDI2; Protein disulfide isomerase-like 2-2; AtPDIL2-2; Flags: Precursor (At5g60640)                                                                                                                                            | 8.889  |
| Cs3g02660       | --                                                                                                                             | (At3g11920)                                                                                                                                                                                                                                                                                                                  | 1.360  |
| orange1.1t03073 | K09527 DnaJ homolog subfamily C member 7   (RefSeq) TPR repeat-containing thioredoxin TTL1 (A)                                 | TPR repeat-containing thioredoxin TTL1; Tetratricopeptide repeat thioredoxin-like 1 (At1g53300_1)                                                                                                                                                                                                                            | -1.339 |
| Cs2g15600       | K09527 DnaJ homolog subfamily C member 7   (RefSeq) TPR repeat-containing thioredoxin TTL1 (A)                                 | Inactive TPR repeat-containing thioredoxin TTL3; Tetratricopeptide repeat thioredoxin-like 3; VH1-interacting TPR-containing protein (At2g42580)                                                                                                                                                                             | -2.438 |
| Cs6g21260       | --                                                                                                                             | Gibberellin-regulated protein 4; GAST1 protein homolog 4; Flags: Precursor (At5g15230)                                                                                                                                                                                                                                       | -3.231 |
| Cs4g12290       | K03671 thioredoxin 1   (RefSeq) ATC; thioredoxin-like protein CXXS1 (A)                                                        | Thioredoxin-like protein CXXS1; AtCXXS1; Mono-cysteine thioredoxin 1 (At1g11530)                                                                                                                                                                                                                                             | -2.408 |
| novel.84        | --                                                                                                                             | Thioredoxin-like protein CDSP32, chloroplastic; Chloroplastic drought-induced stress protein of 32 KDa; AtCDSP32; Flags: Precursor (At1g76080)                                                                                                                                                                               | 1.132  |
| Cs5g10830       | K03671 thioredoxin 1   (RefSeq) thioredoxin H-type (A)                                                                         | Thioredoxin-like 1-2, chloroplastic; Atypical cysteine/histidine-rich thioredoxin 5; AtACTH5; Lilium-type thioredoxin 1-2; Flags: Precursor (At5g61440)                                                                                                                                                                      | -1.747 |
| Cs6g13510       | K17479 glutaredoxin domain-containing cysteine-rich protein 1   (RefSeq) uncharacterized protein At3g28850 (A)                 | Uncharacterized protein At5g39865 (At5g06470)                                                                                                                                                                                                                                                                                | -1.723 |
| Cs2g13810       | K03676 glutaredoxin 3   (RefSeq) glutaredoxin-C5-like (A)                                                                      | Glutaredoxin-C1 (At5g14070)                                                                                                                                                                                                                                                                                                  | -3.846 |

|                                                     |                                                                                                                                             |                                                                                                                                                                    |        |
|-----------------------------------------------------|---------------------------------------------------------------------------------------------------------------------------------------------|--------------------------------------------------------------------------------------------------------------------------------------------------------------------|--------|
| Cs7g29170                                           | K03283 heat shock 70kDa protein 1/2/6/8   (RefSeq) heat shock 70 kDa protein 18-like (A)                                                    | Probable nucleoredoxin 1-2; OsNrx1-2; EC=1.8.1.8 (At2g16050)                                                                                                       | 1.561  |
| Cs6g14520                                           | K17479 glutaredoxin domain-containing cysteine-rich protein 1   (RefSeq) uncharacterized protein At3g28850 (A)                              | Uncharacterized protein At5g39865 (At5g03870)                                                                                                                      | -1.586 |
|                                                     |                                                                                                                                             |                                                                                                                                                                    |        |
| <b>Glutathione metabolism (ko00480, P = 0.0929)</b> |                                                                                                                                             |                                                                                                                                                                    |        |
| novel.1025                                          | K00036 glucose-6-phosphate 1-dehydrogenase [EC:1.1.1.49 1.1.1.363]   (RefSeq) glucose-6-phosphate 1-dehydrogenase 4, chloroplastic-like (A) | Glucose-6-phosphate 1-dehydrogenase 4, chloroplastic; G6PD4; G6PDH4; EC=1.1.1.49; Flags: Precursor (At1g09420)                                                     | -1.056 |
| Cs6g04140                                           | K00434 L-ascorbate peroxidase [EC:1.11.1.11]   (RefSeq) L-ascorbate peroxidase 2, cytosolic (A)                                             | L-ascorbate peroxidase 2, cytosolic; EC=1.11.1.11; L-ascorbate peroxidase 1b; APX1b; AtAPx02 (At3g09640)                                                           | -2.405 |
| Cs5g03810                                           | K00799 glutathione S-transferase [EC:2.5.1.18]   (RefSeq) glutathione S-transferase T1-like (A)                                             | Glutathione S-transferase T1; AtGSTT1; EC=2.5.1.18; GST class-theta member 1; Glutathione S-transferase 10 (At5g41210)                                             | 1.518  |
| Cs5g03900                                           | K00799 glutathione S-transferase [EC:2.5.1.18]   (RefSeq) glutathione S-transferase U10-like (A)                                            | Glutathione S-transferase U10; AtGSTU10; EC=2.5.1.18; GST class-tau member 10 (At1g74590)                                                                          | 3.009  |
| Cs5g32800                                           | K00799 glutathione S-transferase [EC:2.5.1.18]   (RefSeq) glutathione S-transferase F6 (A)                                                  | Glutathione S-transferase; EC=2.5.1.18; 25 kDa auxin-binding protein; GST class-phi (At1g02930)                                                                    | -1.109 |
| Cs5g34430                                           | K00799 glutathione S-transferase [EC:2.5.1.18]   (RefSeq) probable glutathione S-transferase (A)                                            | Probable glutathione S-transferase; EC=2.5.1.18; Auxin-induced protein PGNT1/PCNT110 (At2g29420)                                                                   | -1.499 |
| Cs6g03830                                           | K00799 glutathione S-transferase [EC:2.5.1.18]   (RefSeq) glutathione S-transferase L3-like (A)                                             | Glutathione S-transferase L3; AtGSTL3; EC=2.5.1.18; GST class-lambda member 3 (At5g02790)                                                                          | -1.456 |
| Cs7g04580                                           | K00799 glutathione S-transferase [EC:2.5.1.18]   (RefSeq) glutathione S-transferase U17-like (A)                                            | Glutathione S-transferase U17; AtGSTU17; EC=2.5.1.18; GST class-tau member 17; Glutathione S-transferase 30; Protein EARLY RESPONSIVE TO DEHYDRATION 9 (At1g10360) | 1.660  |
| Cs7g14120                                           | K00799 glutathione S-transferase [EC:2.5.1.18]   (RefSeq) probable glutathione S-transferase (A)                                            | Probable glutathione S-transferase parC; EC=2.5.1.18; Auxin-regulated protein parC (At1g78370)                                                                     | 6.384  |
| Cs7g14180                                           | K00799 glutathione S-transferase [EC:2.5.1.18]   (RefSeq) probable glutathione S-transferase (A)                                            | Probable glutathione S-transferase parC; EC=2.5.1.18; Auxin-regulated protein parC (At1g78380)                                                                     | 3.644  |
| Cs7g14300                                           | K00799 glutathione S-transferase [EC:2.5.1.18]   (RefSeq) probable glutathione S-transferase (A)                                            | Probable glutathione S-transferase parC; EC=2.5.1.18; Auxin-regulated protein parC (At1g78380)                                                                     | 7.869  |
| Cs7g15760                                           | K00799 glutathione S-transferase [EC:2.5.1.18]   (RefSeq) probable glutathione S-transferase (A)                                            | Probable glutathione S-transferase; EC=2.5.1.18; Auxin-induced protein PGNT35/PCNT111 (At2g29420)                                                                  | 2.927  |
| Cs9g10400                                           | K00799 glutathione S-transferase [EC:2.5.1.18]   (RefSeq) probable glutathione S-transferase (A)                                            | Probable glutathione S-transferase; EC=2.5.1.18; G2-4; Heat shock protein 26A (At2g29420)                                                                          | -1.242 |
| orange1.1t03624                                     | K00799 glutathione S-transferase [EC:2.5.1.18]   (RefSeq) probable glutathione S-transferase (A)                                            | Probable glutathione S-transferase; EC=2.5.1.18; G2-4; Heat shock protein 26A (At2g29420)                                                                          | -1.051 |

|                                                                |                                                                                                                                                                            |                                                                                                                                                                                                                                                                                                                                                                                                             |        |
|----------------------------------------------------------------|----------------------------------------------------------------------------------------------------------------------------------------------------------------------------|-------------------------------------------------------------------------------------------------------------------------------------------------------------------------------------------------------------------------------------------------------------------------------------------------------------------------------------------------------------------------------------------------------------|--------|
| orange1.1t04722                                                | K00799 glutathione S-transferase [EC:2.5.1.18]   (RefSeq) probable glutathione S-transferase parC (A)                                                                      | Glutathione S-transferase U19; AtGSTU19; EC=2.5.1.18; GST class-tau member 19; Glutathione S-transferase 8 (At1g17180)                                                                                                                                                                                                                                                                                      | 13.630 |
| orange1.1t04724                                                | K00799 glutathione S-transferase [EC:2.5.1.18]   (RefSeq) probable glutathione S-transferase parC (A)                                                                      | Probable glutathione S-transferase; EC=2.5.1.18; Auxin-induced protein PCNT107 (At1g78380)                                                                                                                                                                                                                                                                                                                  | 8.803  |
| orange1.1t04916                                                | K00799 glutathione S-transferase [EC:2.5.1.18]   (RefSeq) probable glutathione S-transferase parC (A)                                                                      | Probable glutathione S-transferase parC; EC=2.5.1.18; Auxin-regulated protein parC (At1g17180)                                                                                                                                                                                                                                                                                                              | 14.110 |
| orange1.1t05889                                                | K00799 glutathione S-transferase [EC:2.5.1.18]   (RefSeq) probable glutathione S-transferase (A)                                                                           | Probable glutathione S-transferase; EC=2.5.1.18; Auxin-induced protein PCNT103 (At2g29420)                                                                                                                                                                                                                                                                                                                  | -1.145 |
| novel.1265                                                     | K00799 glutathione S-transferase [EC:2.5.1.18]   (RefSeq) probable glutathione S-transferase parC (A)                                                                      | Probable glutathione S-transferase parC; EC=2.5.1.18; Auxin-regulated protein parC (At1g53680)                                                                                                                                                                                                                                                                                                              | 10.461 |
| novel.1267                                                     | K00799 glutathione S-transferase [EC:2.5.1.18]   (RefSeq) probable glutathione S-transferase parC (A)                                                                      | Probable glutathione S-transferase parC; EC=2.5.1.18; Auxin-regulated protein parC (At1g78380)                                                                                                                                                                                                                                                                                                              | 10.715 |
| novel.1308                                                     | K00799 glutathione S-transferase [EC:2.5.1.18]   (RefSeq) probable glutathione S-transferase (A)                                                                           | Retrovirus-related Pol polyprotein from transposon TNT 1-94; Includes: Protease; EC=3.4.23.-; Includes: Reverse transcriptase; EC=2.7.7.49; Includes: Endonuclease (At3g29775)                                                                                                                                                                                                                              | 1.648  |
| Cs7g30910                                                      | K10808 ribonucleoside-diphosphate reductase subunit M2 [EC:1.17.4.1]   (RefSeq) ribonucleoside-diphosphate reductase small chain (A)                                       | Ribonucleoside-diphosphate reductase small chain; EC=1.17.4.1; Ribonucleoside-diphosphate reductase R2 subunit; Ribonucleotide reductase small subunit (At3g27060)                                                                                                                                                                                                                                          | -1.313 |
| Cs9g05930                                                      | K10808 ribonucleoside-diphosphate reductase subunit M2 [EC:1.17.4.1]   (RefSeq) ribonucleoside-diphosphate reductase small chain A (A)                                     | Ribonucleoside-diphosphate reductase small chain A; EC=1.17.4.1; Ribonucleoside-diphosphate reductase R2A subunit; AtRNR2; Protein R2at; Ribonucleotide reductase small subunit A (At3g23580)                                                                                                                                                                                                               | 1.069  |
| Cs4g13090                                                      | K18592 gamma-glutamyltranspeptidase / glutathione hydrolase / leukotriene-C4 hydrolase [EC:2.3.2.2 3.4.19.13 3.4.19.14]   (RefSeq) gamma-glutamyltranspeptidase 3-like (A) | Glutathione hydrolase 3; EC=3.4.19.13; Gamma-glutamyltransferase 3; Gamma-glutamyltranspeptidase 3; EC=2.3.2.2; Gamma-glutamyltranspeptidase 4 (At4g29210)                                                                                                                                                                                                                                                  | 1.508  |
| Cs4g13100                                                      | K18592 gamma-glutamyltranspeptidase / glutathione hydrolase / leukotriene-C4 hydrolase [EC:2.3.2.2 3.4.19.13 3.4.19.14]   (RefSeq) gamma-glutamyltranspeptidase 3 (A)      | Glutathione hydrolase 3; EC=3.4.19.13; Gamma-glutamyltransferase 3; Gamma-glutamyltranspeptidase 3; EC=2.3.2.2; Gamma-glutamyltranspeptidase 4 (At5g11700)                                                                                                                                                                                                                                                  | 1.574  |
| Cs6g17520                                                      | K21888 glutathione dehydrogenase/transferase [EC:1.8.5.1 2.5.1.18]   (RefSeq) glutathione S-transferase DHAR3, chloroplastic (A)                                           | Glutathione S-transferase DHAR3, chloroplastic; EC=2.5.1.18 {ECO:0000269 PubMed:12077129}; Chloride intracellular channel homolog 3; CLIC homolog 3; Glutathione-dependent dehydroascorbate reductase 3 {ECO:0000303 PubMed:12077129}; AtDHAR3 {ECO:0000303 PubMed:12077129}; ChIDHAR; GSH-dependent dehydroascorbate reductase 3; EC=1.8.5.1 {ECO:0000269 PubMed:12077129}; Flags: Precursor (At5g16710_1) | -1.042 |
| <i>Ascorbate and aldarate metabolism (ko00053, P = 0.0961)</i> |                                                                                                                                                                            |                                                                                                                                                                                                                                                                                                                                                                                                             |        |

|                 |                                                                                                                                  |                                                                                                                                                                                                                                                                                                                                                                                                               |        |
|-----------------|----------------------------------------------------------------------------------------------------------------------------------|---------------------------------------------------------------------------------------------------------------------------------------------------------------------------------------------------------------------------------------------------------------------------------------------------------------------------------------------------------------------------------------------------------------|--------|
| Cs1g23090       | K00423 L-ascorbate oxidase [EC:1.10.3.3]   (RefSeq) L-ascorbate oxidase homolog (A)                                              | L-ascorbate oxidase homolog; EC=1.10.3.-; Pollen-specific protein NTP303; Flags: Precursor (At5g66920)                                                                                                                                                                                                                                                                                                        | -1.503 |
| Cs2g02940       | K00423 L-ascorbate oxidase [EC:1.10.3.3]   (RefSeq) L-ascorbate oxidase homolog (A)                                              | L-ascorbate oxidase homolog; EC=1.10.3.-; Flags: Precursor (At4g22010)                                                                                                                                                                                                                                                                                                                                        | -2.538 |
| Cs2g21220       | K00423 L-ascorbate oxidase [EC:1.10.3.3]   (RefSeq) L-ascorbate oxidase homolog (A)                                              | L-ascorbate oxidase homolog; EC=1.10.3.-; Pollen-specific protein NTP303; Flags: Precursor (At4g22010)                                                                                                                                                                                                                                                                                                        | -1.091 |
| Cs2g29090       | K00423 L-ascorbate oxidase [EC:1.10.3.3]   (RefSeq) L-ascorbate oxidase-like (A)                                                 | L-ascorbate oxidase; ASO; Ascorbase; EC=1.10.3.3; Flags: Precursor (At5g21100)                                                                                                                                                                                                                                                                                                                                | -1.640 |
| Cs3g26900       | K00423 L-ascorbate oxidase [EC:1.10.3.3]   (RefSeq) L-ascorbate oxidase homolog (A)                                              | L-ascorbate oxidase homolog; EC=1.10.3.-; Flags: Precursor (At1g76160)                                                                                                                                                                                                                                                                                                                                        | -2.826 |
| orange1.1t01564 | K00423 L-ascorbate oxidase [EC:1.10.3.3]   (RefSeq) L-ascorbate oxidase homolog (A)                                              | Monocopper oxidase-like protein SKU5; Skewed roots; Flags: Precursor (At5g48450)                                                                                                                                                                                                                                                                                                                              | -1.347 |
| Cs6g04140       | K00434 L-ascorbate peroxidase [EC:1.11.1.11]   (RefSeq) L-ascorbate peroxidase 2, cytosolic (A)                                  | L-ascorbate peroxidase 2, cytosolic; EC=1.11.1.11; L-ascorbate peroxidase 1b; APX1b; AtAPx02 (At3g09640)                                                                                                                                                                                                                                                                                                      | -2.405 |
| Cs5g03080       | K08232 monodehydroascorbate reductase (NADH) [EC:1.6.5.4]   (RefSeq) monodehydroascorbate reductase 5, mitochondrial (A)         | Monodehydroascorbate reductase, chloroplastic/mitochondrial {ECO:0000303 PubMed:16146528}; EC=1.6.5.4 {ECO:0000269 PubMed:26339024}; Monodehydroascorbate reductase 5, mitochondrial {ECO:0000303 PubMed:16146528}; AtMDAR5 {ECO:0000303 PubMed:16146528}; Monodehydroascorbate reductase 6, chloroplastic {ECO:0000303 PubMed:16146528}; AtMDAR6 {ECO:0000303 PubMed:16146528}; Flags: Precursor (At1g63940) | -1.609 |
| Cs3g10840       | K10046 GDP-D-mannose 3', 5'-epimerase [EC:5.1.3.18 5.1.3.-]   (RefSeq) GDP-mannose 3,5-epimerase 1 (A)                           | GDP-mannose 3,5-epimerase 1; GDP-Man 3,5-epimerase 1; EC=5.1.3.18; OsGME-1 (At5g28840)                                                                                                                                                                                                                                                                                                                        | -1.000 |
| Cs7g30780       | K12447 UDP-sugar pyrophosphorylase [EC:2.7.7.64]   (RefSeq) UDP-sugar pyrophosphorylase (A)                                      | UTP--glucose-1-phosphate uridylyltransferase 3, chloroplastic {ECO:0000305}; EC=2.7.7.9 {ECO:0000269 PubMed:19286968}; UDP-glucose pyrophosphorylase 3 {ECO:0000303 PubMed:19286968}; Flags: Precursor (At3g56040)                                                                                                                                                                                            | 2.313  |
| Cs6g17580       | K14190 GDP-L-galactose phosphorylase [EC:2.7.7.69]   (RefSeq) GDP-L-galactose phosphorylase 1-like (A)                           | GDP-L-galactose phosphorylase 1; EC=2.7.7.69; Protein VITAMIN C DEFECTIVE 2 (At5g55120)                                                                                                                                                                                                                                                                                                                       | 1.636  |
| Cs3g10600       | K17744 L-galactose dehydrogenase [EC:1.1.1.316]   (RefSeq) L-galactose dehydrogenase (A)                                         | Probable aldo-keto reductase 1; GmAKR1; EC=1.1.1.- (At1g60750)                                                                                                                                                                                                                                                                                                                                                | 1.668  |
| Cs6g17520       | K21888 glutathione dehydrogenase/transferase [EC:1.8.5.1 2.5.1.18]   (RefSeq) glutathione S-transferase DHAR3, chloroplastic (A) | Glutathione S-transferase DHAR3, chloroplastic; EC=2.5.1.18 {ECO:0000269 PubMed:12077129}; Chloride intracellular channel homolog 3; CLIC homolog 3; Glutathione-dependent dehydroascorbate reductase 3 {ECO:0000303 PubMed:12077129}; AtDHAR3 {ECO:0000303 PubMed:12077129}; ChlDHAR; GSH-dependent dehydroascorbate reductase 3; EC=1.8.5.1 {ECO:0000269 PubMed:12077129}; Flags: Precursor (At5g16710_1)   | -1.042 |

|                                                                     |                                                                                                                                                    |                                                                                                                                                                                                                                   |        |
|---------------------------------------------------------------------|----------------------------------------------------------------------------------------------------------------------------------------------------|-----------------------------------------------------------------------------------------------------------------------------------------------------------------------------------------------------------------------------------|--------|
|                                                                     |                                                                                                                                                    |                                                                                                                                                                                                                                   |        |
| <b>Nicotinate and nicotinamide metabolism (ko00760, P = 0.2505)</b> |                                                                                                                                                    |                                                                                                                                                                                                                                   |        |
| Cs2g28120                                                           | K00278 L-aspartate oxidase [EC:1.4.3.16]   (RefSeq) L-aspartate oxidase, chloroplastic (A)                                                         | L-aspartate oxidase, chloroplastic; EC=1.4.3.16; Protein FLAGELLIN-INSENSITIVE 4; Flags: Precursor (At5g14760)                                                                                                                    | -1.382 |
| Cs6g15100                                                           | K01240 uridine nucleosidase [EC:3.2.2.3]   (RefSeq) uridine nucleosidase 1 (A)                                                                     | Uridine nucleosidase 1; EC=3.2.2.3; Uridine ribohydrolase 1 (At2g36310)                                                                                                                                                           | -1.348 |
| orange1.1t02502                                                     | K01240 uridine nucleosidase [EC:3.2.2.3]   (RefSeq) probable uridine nucleosidase 2 (A)                                                            | Probable uridine nucleosidase 2; EC=3.2.2.3; Uridine ribohydrolase 2 (At1g05620)                                                                                                                                                  | -1.646 |
| Cs3g03130                                                           | K01513 ectonucleotide pyrophosphatase/phosphodiesterase family member 1/3 [EC:3.1.4.1 3.6.1.9]   (RefSeq) venom phosphodiesterase 2 (A)            | (At4g29680)                                                                                                                                                                                                                       | 2.146  |
| novel.1229                                                          | K03517 quinolinate synthase [EC:2.5.1.72]   (RefSeq) quinolinate synthase, chloroplastic (A)                                                       | SufE-like protein 2, chloroplastic; Protein SULFUR E 2 (At1g67810)                                                                                                                                                                | -1.227 |
| Cs2g19220                                                           | K11416 mono-ADP-ribosyltransferase sirtuin 6 [EC:2.4.2.31]   (RefSeq) NAD-dependent protein deacetylase SRT1-like (A)                              | NAD-dependent protein deacetylase SRT1; EC=3.5.1.-; Regulatory protein SIR2 homolog 1; SIR2-like protein 1 (At5g55760)                                                                                                            | 1.245  |
| <b>Biotin metabolism (ko00780, P = 0.0618)</b>                      |                                                                                                                                                    |                                                                                                                                                                                                                                   |        |
| Cs1g22910                                                           | K00059 3-oxoacyl-[acyl-carrier protein] reductase [EC:1.1.1.100]   (RefSeq) short-chain type dehydrogenase/reductase-like (A)                      | NADPH-dependent aldehyde reductase-like protein, chloroplastic {ECO:0000250 UniProtKB:Q9SQR2}; EC=1.1.1.- {ECO:0000250 UniProtKB:Q9SQR2}; Flags: Precursor (At3g50560)                                                            | 2.950  |
| Cs7g10260                                                           | K00059 3-oxoacyl-[acyl-carrier protein] reductase [EC:1.1.1.100]   (RefSeq) 3-oxoacyl-[acyl-carrier-protein] reductase 4 (A)                       | 3-oxoacyl-[acyl-carrier-protein] reductase, chloroplastic; EC=1.1.1.100; 3-ketoacyl-acyl carrier protein reductase; Flags: Precursor (At1g24360)                                                                                  | 2.622  |
| orange1.1t02015                                                     | K00208 enoyl-[acyl-carrier protein] reductase I [EC:1.3.1.9 1.3.1.10]   (RefSeq) enoyl-[acyl-carrier-protein] reductase [NADH], chloroplastic (A)  | Enoyl-[acyl-carrier-protein] reductase [NADH], chloroplastic; ENR; EC=1.3.1.9; NADH-dependent enoyl-ACP reductase 1; Protein MOSAIC DEATH 1; Flags: Precursor (At2g05990)                                                         | 2.201  |
| novel.1941                                                          | K00208 enoyl-[acyl-carrier protein] reductase I [EC:1.3.1.9 1.3.1.10]   (RefSeq) enoyl-[acyl-carrier-protein] reductase [NADH], chloroplastic (A)  | Enoyl-[acyl-carrier-protein] reductase [NADH], chloroplastic; EC=1.3.1.9; NADH-dependent enoyl-ACP reductase; Flags: Precursor (At2g05990)                                                                                        | 9.786  |
| orange1.1t01990                                                     | K02372 3-hydroxyacyl-[acyl-carrier-protein] dehydratase [EC:4.2.1.59]   (RefSeq) 3-hydroxyacyl-[acyl-carrier-protein] dehydratase FabZ-like (A)    | (At5g10160)                                                                                                                                                                                                                       | 1.613  |
| Cs1g16920                                                           | K09458 3-oxoacyl-[acyl-carrier-protein] synthase II [EC:2.3.1.179]   (RefSeq) 3-oxoacyl-[acyl-carrier-protein] synthase II, chloroplastic-like (A) | 3-oxoacyl-[acyl-carrier-protein] synthase II, chloroplastic; EC=2.3.1.41; Beta-ketoacyl-acyl-carrier-protein synthase II; AtKAS2; Beta-ketoacyl-ACP synthetase 2; Protein FATTY ACID BIOSYNTHESIS 1; Flags: Precursor (At1g74960) | 7.148  |
| Cs1g17040                                                           | K09458 3-oxoacyl-[acyl-carrier-protein] synthase II [EC:2.3.1.179]   (RefSeq) 3-oxoacyl-[acyl-carrier-protein] synthase II, chloroplastic-like (A) | 3-oxoacyl-[acyl-carrier-protein] synthase II, chloroplastic; EC=2.3.1.41; Beta-ketoacyl-acyl-carrier-protein synthase II; AtKAS2; Beta-ketoacyl-ACP synthetase 2; Protein FATTY ACID BIOSYNTHESIS 1; Flags: Precursor (At1g74960) | 6.988  |

|                                                                                                 |                                                                                                                                                    |                                                                                                                                                                                                                                   |        |
|-------------------------------------------------------------------------------------------------|----------------------------------------------------------------------------------------------------------------------------------------------------|-----------------------------------------------------------------------------------------------------------------------------------------------------------------------------------------------------------------------------------|--------|
| Cs1g17070                                                                                       | K09458 3-oxoacyl-[acyl-carrier-protein] synthase II [EC:2.3.1.179]   (RefSeq) 3-oxoacyl-[acyl-carrier-protein] synthase II, chloroplastic-like (A) | 3-oxoacyl-[acyl-carrier-protein] synthase II, chloroplastic; EC=2.3.1.41; Beta-ketoacyl-acyl-carrier-protein synthase II; AtKAS2; Beta-ketoacyl-ACP synthetase 2; Protein FATTY ACID BIOSYNTHESIS 1; Flags: Precursor (At1g74960) | 7.704  |
| Cs5g01990                                                                                       | K09458 3-oxoacyl-[acyl-carrier-protein] synthase II [EC:2.3.1.179]   (RefSeq) 3-oxoacyl-[acyl-carrier-protein] synthase I, chloroplastic-like (A)  | 3-oxoacyl-[acyl-carrier-protein] synthase I, chloroplastic; EC=2.3.1.41; Beta-ketoacyl-ACP synthase I; KAS I; Flags: Precursor (At5g46290)                                                                                        | 7.925  |
|                                                                                                 |                                                                                                                                                    |                                                                                                                                                                                                                                   |        |
| <b><i>Riboflavin metabolism (ko00740, P = 0.2517)</i></b>                                       |                                                                                                                                                    |                                                                                                                                                                                                                                   |        |
| Cs3g03130                                                                                       | K01513 ectonucleotide pyrophosphatase/phosphodiesterase family member 1/3 [EC:3.1.4.1 3.6.1.9]   (RefSeq) venom phosphodiesterase 2 (A)            | (At4g29680)                                                                                                                                                                                                                       | 2.146  |
| Cs2g17980                                                                                       | K14379 tartrate-resistant acid phosphatase type 5 [EC:3.1.3.2]   (RefSeq) purple acid phosphatase 8-like (A)                                       | Purple acid phosphatase 8; EC=3.1.3.2; Flags: Precursor (At1g14700)                                                                                                                                                               | -1.448 |
| Cs1g19780                                                                                       | K20884 riboflavin kinase / FMN hydrolase [EC:2.7.1.26 3.1.3.102]   (RefSeq) bifunctional riboflavin kinase/FMN phosphatase (A)                     | Haloacid dehalogenase-like hydrolase domain-containing protein At4g39970; EC=3.1.3.-; Flags: Precursor (At4g39970)                                                                                                                | 1.960  |
| Cs4g03480                                                                                       | K20884 riboflavin kinase / FMN hydrolase [EC:2.7.1.26 3.1.3.102]   (RefSeq) bifunctional riboflavin kinase/FMN phosphatase (A)                     | (DL)-glycerol-3-phosphatase 2; EC=3.1.3.21; Glycerol-1-phosphatase 2; Haloacid dehalogenase-like hydrolase domain-containing protein GPP2 (At5g57440)                                                                             | -1.545 |
| Cs5g06660                                                                                       | K20884 riboflavin kinase / FMN hydrolase [EC:2.7.1.26 3.1.3.102]   (RefSeq) bifunctional riboflavin kinase/FMN phosphatase (A)                     | CBBY-like protein {ECO:0000303 PubMed:27246049}; AtCbby {ECO:0000303 PubMed:27246049}; EC=3.1.3.- {ECO:0000269 PubMed:27246049}; Flags: Precursor (At3g48420_1)                                                                   | 1.072  |
|                                                                                                 |                                                                                                                                                    |                                                                                                                                                                                                                                   |        |
| <b><i>DEGs related to detoxification of aldehydes (excluding glutathione S-transferase)</i></b> |                                                                                                                                                    |                                                                                                                                                                                                                                   |        |
| Cs3g10600                                                                                       | K17744 L-galactose dehydrogenase [EC:1.1.1.316]   (RefSeq) L-galactose dehydrogenase (A)                                                           | Probable aldo-keto reductase 1; GmAKR1; EC=1.1.1.- (At1g60750)                                                                                                                                                                    | 1.668  |
| Cs3g10610                                                                                       | K05275 pyridoxine 4-dehydrogenase [EC:1.1.1.65]   (RefSeq) pyridoxal reductase, chloroplastic (A)                                                  | Probable aldo-keto reductase 1; GmAKR1; EC=1.1.1.- (At1g60690)                                                                                                                                                                    | 1.581  |
| Cs3g10620                                                                                       | K05275 pyridoxine 4-dehydrogenase [EC:1.1.1.65]   (RefSeq) pyridoxal reductase, chloroplastic (A)                                                  | Probable aldo-keto reductase 1; GmAKR1; EC=1.1.1.- (At1g60690)                                                                                                                                                                    | 2.233  |
| Cs8g10160                                                                                       | K05275 pyridoxine 4-dehydrogenase [EC:1.1.1.65]   (RefSeq) pyridoxal reductase, chloroplastic (A)                                                  | Probable aldo-keto reductase 2; EC=1.1.1.- (At1g60690)                                                                                                                                                                            | -1.077 |
| Cs8g10180                                                                                       | K05275 pyridoxine 4-dehydrogenase [EC:1.1.1.65]   (RefSeq) pyridoxal reductase, chloroplastic (A)                                                  | Probable aldo-keto reductase 2; EC=1.1.1.- (At1g60690)                                                                                                                                                                            | -1.094 |
| orange1.1t03053                                                                                 | K00002 alcohol dehydrogenase (NADP+) [EC:1.1.1.2]   (RefSeq) aldo-keto reductase family 4 member C9-like (A)                                       | NADPH-dependent aldo-keto reductase, chloroplastic {ECO:0000303 PubMed:21169366}; AtChIAKR {ECO:0000303 PubMed:21169366}; EC=1.1.1.-                                                                                              | -1.761 |

|                 |                                                                                      |                                                                                                                                                                                                                                                                                                                                                                                                                 |        |
|-----------------|--------------------------------------------------------------------------------------|-----------------------------------------------------------------------------------------------------------------------------------------------------------------------------------------------------------------------------------------------------------------------------------------------------------------------------------------------------------------------------------------------------------------|--------|
|                 |                                                                                      | {ECO:0000269 PubMed:19616008, ECO:0000269 PubMed:21169366}; Aldo-keto reductase family 4 member C9 (At2g37770)                                                                                                                                                                                                                                                                                                  |        |
| Cs8g10110       | --                                                                                   | Probable aldo-keto reductase 2; EC=1.1.1.- (At1g60680)                                                                                                                                                                                                                                                                                                                                                          | -2.133 |
| Cs5g20970       | K00344 NADPH2:quinone reductase [EC:1.6.5.5]   (RefSeq) quinone oxidoreductase 1 (A) | 2-alkenal reductase (NADP(+)-dependent); EC=1.3.1.102<br>{ECO:0000269 PubMed:17945329, ECO:0000269 Ref.3, ECO:0000269 Ref.4};<br>Alkenal double bound reductase; Allylic alcohol dehydrogenase 1<br>{ECO:0000303 PubMed:11117876}; allyl-ADH1<br>{ECO:0000303 PubMed:11117876}; Flavin-free double bond reductase<br>{ECO:0000303 Ref.4}; NtDBR; Pulegone reductase {ECO:0000303 Ref.3};<br>NtRed-1 (At5g16990) | 3.270  |
| orange1.1t04579 | K00344 NADPH2:quinone reductase [EC:1.6.5.5]   (RefSeq) quinone oxidoreductase 1 (A) | 2-alkenal reductase (NADP(+)-dependent); EC=1.3.1.102<br>{ECO:0000269 PubMed:17945329, ECO:0000269 Ref.3, ECO:0000269 Ref.4};<br>Alkenal double bound reductase; Allylic alcohol dehydrogenase 1<br>{ECO:0000303 PubMed:11117876}; allyl-ADH1<br>{ECO:0000303 PubMed:11117876}; Flavin-free double bond reductase<br>{ECO:0000303 Ref.4}; NtDBR; Pulegone reductase {ECO:0000303 Ref.3};<br>NtRed-1 (At5g16990) | 1.784  |
| Cs5g21050       | K00344 NADPH2:quinone reductase [EC:1.6.5.5]   (RefSeq) quinone oxidoreductase 1 (A) | 2-alkenal reductase (NADP(+)-dependent); EC=1.3.1.102<br>{ECO:0000269 PubMed:17945329, ECO:0000269 Ref.3, ECO:0000269 Ref.4};<br>Alkenal double bound reductase; Allylic alcohol dehydrogenase 1<br>{ECO:0000303 PubMed:11117876}; allyl-ADH1<br>{ECO:0000303 PubMed:11117876}; Flavin-free double bond reductase<br>{ECO:0000303 Ref.4}; NtDBR; Pulegone reductase {ECO:0000303 Ref.3};<br>NtRed-1 (At5g16990) | 1.354  |
| novel.2492      | --                                                                                   | 2-alkenal reductase (NADP(+)-dependent); EC=1.3.1.102<br>{ECO:0000269 PubMed:17945329, ECO:0000269 Ref.3, ECO:0000269 Ref.4};<br>Alkenal double bound reductase; Allylic alcohol dehydrogenase 1<br>{ECO:0000303 PubMed:11117876}; allyl-ADH1<br>{ECO:0000303 PubMed:11117876}; Flavin-free double bond reductase<br>{ECO:0000303 Ref.4}; NtDBR; Pulegone reductase {ECO:0000303 Ref.3};<br>NtRed-1 (At5g16990) | 2.943  |
| novel.2256      | --                                                                                   | 2-alkenal reductase (NADP(+)-dependent); EC=1.3.1.102<br>{ECO:0000269 PubMed:17945329, ECO:0000269 Ref.3, ECO:0000269 Ref.4};<br>Alkenal double bound reductase; Allylic alcohol dehydrogenase 1<br>{ECO:0000303 PubMed:11117876}; allyl-ADH1<br>{ECO:0000303 PubMed:11117876}; Flavin-free double bond reductase                                                                                               | 2.060  |

|           |                                                                                                                       |                                                                                                                                                                                                                                                                                                                                                                                                                   |        |
|-----------|-----------------------------------------------------------------------------------------------------------------------|-------------------------------------------------------------------------------------------------------------------------------------------------------------------------------------------------------------------------------------------------------------------------------------------------------------------------------------------------------------------------------------------------------------------|--------|
|           |                                                                                                                       | {ECO:0000303 Ref.4}; NtDBR; Pulegone reductase {ECO:0000303 Ref.3}; NtRed-1 (At3g03080)                                                                                                                                                                                                                                                                                                                           |        |
| Cs5g20910 | K00224 chloroplastic oxoene reductase [EC:1.3.1.-]   (RefSeq) chloroplast envelope quinone oxidoreductase homolog (A) | 2-alkenal reductase (NADP(+)-dependent); EC=1.3.1.102<br>{ECO:0000269 PubMed:17945329, ECO:0000269 Ref.3, ECO:0000269 Ref.4};<br>Alkenal double bound reductase; Allylic alcohol dehydrogenase 1<br>{ECO:0000303 PubMed:11117876}; allyl-ADH1<br>{ECO:0000303 PubMed:11117876}; Flavin-free double bond reductase<br>{ECO:0000303 Ref.4}; NtDBR; Pulegone reductase {ECO:0000303 Ref.3};<br>NtRed-1 (At3g03080)   | 2.204  |
| Cs5g21060 | --                                                                                                                    | 2-alkenal reductase (NADP(+)-dependent); EC=1.3.1.102<br>{ECO:0000269 PubMed:17945329, ECO:0000269 Ref.3, ECO:0000269 Ref.4};<br>Alkenal double bound reductase; Allylic alcohol dehydrogenase 1<br>{ECO:0000303 PubMed:11117876}; allyl-ADH1<br>{ECO:0000303 PubMed:11117876}; Flavin-free double bond reductase<br>{ECO:0000303 Ref.4}; NtDBR; Pulegone reductase {ECO:0000303 Ref.3};<br>NtRed-1 (At3g03080)   | 6.236  |
| Cs4g17780 | K00344 NADPH2:quinone reductase [EC:1.6.5.5]   (RefSeq) quinone oxidoreductase 1 (A)                                  | 2-alkenal reductase (NADP(+)-dependent); EC=1.3.1.102<br>{ECO:0000269 PubMed:17945329, ECO:0000269 Ref.3, ECO:0000269 Ref.4};<br>Alkenal double bound reductase; Allylic alcohol dehydrogenase 1<br>{ECO:0000303 PubMed:11117876}; allyl-ADH1<br>{ECO:0000303 PubMed:11117876}; Flavin-free double bond reductase<br>{ECO:0000303 Ref.4}; NtDBR; Pulegone reductase {ECO:0000303 Ref.3};<br>NtRed-1 (At5g16970)   | 7.250  |
| Cs8g05790 | K00224 chloroplastic oxoene reductase [EC:1.3.1.-]   (RefSeq) chloroplast envelope quinone oxidoreductase homolog (A) | 2-alkenal reductase (NADP(+)-dependent); EC=1.3.1.102<br>{ECO:0000269 PubMed:17945329, ECO:0000269 Ref.3, ECO:0000269 Ref.4};<br>Alkenal double bound reductase; Allylic alcohol dehydrogenase 1<br>{ECO:0000303 PubMed:11117876}; allyl-ADH1<br>{ECO:0000303 PubMed:11117876}; Flavin-free double bond reductase<br>{ECO:0000303 Ref.4}; NtDBR; Pulegone reductase {ECO:0000303 Ref.3};<br>NtRed-1 (At1g49670_2) | 1.471  |
| novel.928 | --                                                                                                                    | 2-alkenal reductase (NADP(+)-dependent); EC=1.3.1.102<br>{ECO:0000269 PubMed:17945329, ECO:0000269 Ref.3, ECO:0000269 Ref.4};<br>Alkenal double bound reductase; Allylic alcohol dehydrogenase 1<br>{ECO:0000303 PubMed:11117876}; allyl-ADH1<br>{ECO:0000303 PubMed:11117876}; Flavin-free double bond reductase<br>{ECO:0000303 Ref.4}; NtDBR; Pulegone reductase {ECO:0000303 Ref.3};<br>NtRed-1 (At5g16970)   | 11.990 |

|                                                     |                                                                                                                                               |                                                                                                                                                                                                                                                                                                                                                                                               |                            |
|-----------------------------------------------------|-----------------------------------------------------------------------------------------------------------------------------------------------|-----------------------------------------------------------------------------------------------------------------------------------------------------------------------------------------------------------------------------------------------------------------------------------------------------------------------------------------------------------------------------------------------|----------------------------|
| Cs2g12150                                           | K00224 chloroplastic oxoene reductase [EC:1.3.1.-]   (RefSeq) chloroplast envelope quinone oxidoreductase homolog (A)                         | 2-alkenal reductase (NADP(+)-dependent); EC=1.3.1.102 {ECO:0000269 PubMed:17945329, ECO:0000269 Ref.3, ECO:0000269 Ref.4}; Alkenal double bound reductase; Allylic alcohol dehydrogenase 1 {ECO:0000303 PubMed:11117876}; allyl-ADH1 {ECO:0000303 PubMed:11117876}; Flavin-free double bond reductase {ECO:0000303 Ref.4}; NtDBR; Pulegone reductase {ECO:0000303 Ref.3}; NtRed-1 (At1g65560) | 2.963                      |
| Cs5g20940                                           | K03255 protein TIF31   (RefSeq) protein TSS-like (A)                                                                                          | 2-alkenal reductase (NADP(+)-dependent); EC=1.3.1.102 {ECO:0000269 PubMed:17945329, ECO:0000269 Ref.3, ECO:0000269 Ref.4}; Alkenal double bound reductase; Allylic alcohol dehydrogenase 1 {ECO:0000303 PubMed:11117876}; allyl-ADH1 {ECO:0000303 PubMed:11117876}; Flavin-free double bond reductase {ECO:0000303 Ref.4}; NtDBR; Pulegone reductase {ECO:0000303 Ref.3}; NtRed-1 (At5g16990) | 6.060                      |
| orange1.1t04575                                     | K00344 NADPH2:quinone reductase [EC:1.6.5.5]   (RefSeq) quinone oxidoreductase 1 (A)                                                          | 2-alkenal reductase (NADP(+)-dependent); EC=1.3.1.102 {ECO:0000269 PubMed:17945329, ECO:0000269 Ref.3, ECO:0000269 Ref.4}; Alkenal double bound reductase; Allylic alcohol dehydrogenase 1 {ECO:0000303 PubMed:11117876}; allyl-ADH1 {ECO:0000303 PubMed:11117876}; Flavin-free double bond reductase {ECO:0000303 Ref.4}; NtDBR; Pulegone reductase {ECO:0000303 Ref.3}; NtRed-1 (At5g16990) | 1.899                      |
| Cs7g14420                                           | K00121 S-(hydroxymethyl) glutathione dehydrogenase / alcohol dehydrogenase [EC:1.1.1.284 1.1.1.1]   (RefSeq) alcohol dehydrogenase-like 2 (A) | Alcohol dehydrogenase-like 2; EC=1.1.1.1 {ECO:0000250 UniProtKB:P06525} (At1g22440)                                                                                                                                                                                                                                                                                                           | 1.064                      |
| novel.2520                                          | K00121 S-(hydroxymethyl)glutathione dehydrogenase / alcohol dehydrogenase [EC:1.1.1.284 1.1.1.1]   (RefSeq) alcohol dehydrogenase-like 2 (A)  | (At5g16660)                                                                                                                                                                                                                                                                                                                                                                                   | 1.174                      |
| orange1.1t05469                                     | K00121 S-(hydroxymethyl)glutathione dehydrogenase / alcohol dehydrogenase [EC:1.1.1.284 1.1.1.1]   (RefSeq) alcohol dehydrogenase-like 2 (A)  | Alcohol dehydrogenase-like 2; EC=1.1.1.1 {ECO:0000250 UniProtKB:P06525} (At1g22440)                                                                                                                                                                                                                                                                                                           | -1.458                     |
| Cs3g17970                                           | K00121 S-(hydroxymethyl)glutathione dehydrogenase / alcohol dehydrogenase [EC:1.1.1.284 1.1.1.1]   (RefSeq) alcohol dehydrogenase-like 2 (A)  | Alcohol dehydrogenase-like 2; EC=1.1.1.1 {ECO:0000250 UniProtKB:P06525} (At1g22440)                                                                                                                                                                                                                                                                                                           | -1.741                     |
|                                                     |                                                                                                                                               |                                                                                                                                                                                                                                                                                                                                                                                               |                            |
| <b>Index</b>                                        | <b>Compounds</b>                                                                                                                              |                                                                                                                                                                                                                                                                                                                                                                                               | <b>Log<sub>2</sub>(FC)</b> |
| <b>Glutathione metabolism (ko00480, P = 0.0681)</b> |                                                                                                                                               |                                                                                                                                                                                                                                                                                                                                                                                               |                            |
| pme0014                                             | L-Glutamic acid                                                                                                                               |                                                                                                                                                                                                                                                                                                                                                                                               | 1.760                      |

|                                                                            |                                |  |         |
|----------------------------------------------------------------------------|--------------------------------|--|---------|
| pme2527                                                                    | L-Ornithine                    |  | -2.285  |
| pme0195                                                                    | L-Cysteine                     |  | -13.209 |
| pme2292                                                                    | Putrescine                     |  | -2.478  |
| pme1086                                                                    | GSH                            |  | -5.022  |
| mws4134                                                                    | GSSG                           |  | -1.572  |
|                                                                            |                                |  |         |
| <b><i>Ascorbate and aldarate metabolism (ko00053, P = 0.2724)</i></b>      |                                |  |         |
| pme2380                                                                    | $\alpha$ -Ketoglutaric acid    |  | 1.177   |
| pme3705                                                                    | D-Glucuronic acid              |  | 1.113   |
| mws4175                                                                    | D-Glucurono-6,3-lactone        |  | 1.060   |
| pme0516                                                                    | Inositol                       |  | 1.657   |
| Zmyn000108                                                                 | D-Saccharic acid               |  | 1.214   |
|                                                                            |                                |  |         |
| <b><i>Nicotinate and nicotinamide metabolism (ko00760, P = 0.5804)</i></b> |                                |  |         |
| pme2268                                                                    | Trigonelline                   |  | 1.699   |
| mws2628                                                                    | N-Methyl-4-aminobutyric acid   |  | -1.790  |
| Zmzn000078                                                                 | Dihydroxyacetone phosphate     |  | 1.339   |
| Lmgn000219                                                                 | Succinic semialdehyde          |  | 1.107   |
| pma3101                                                                    | Nicotinate D-ribonucleoside    |  | 1.136   |
|                                                                            |                                |  |         |
| <b><i>Biotin metabolism (ko00780, P = 0.2511)</i></b>                      |                                |  |         |
| pme2266                                                                    | Biotin                         |  | 1.386   |
| pme0026                                                                    | L-Lysine                       |  | -1.935  |
|                                                                            |                                |  |         |
| <b><i>Riboflavin metabolism (ko00740, P = 0.2511)</i></b>                  |                                |  |         |
| mws0232                                                                    | Riboflavin (Vitamin B2)        |  | -1.104  |
| MWS5083                                                                    | Flavin single nucleotide (FMN) |  | 1.075   |

**Table S20.** DEGs related to ABC transporters (ko02010) in RN0

| Accession No.                                        | KEGG annotation                                                                                                                   | Swissprot annotation (KOG)                                                                                                                  | Log <sub>2</sub> (FC) |
|------------------------------------------------------|-----------------------------------------------------------------------------------------------------------------------------------|---------------------------------------------------------------------------------------------------------------------------------------------|-----------------------|
| <b><i>ABC transporters (ko02010, P = 0.0002)</i></b> |                                                                                                                                   |                                                                                                                                             |                       |
| Cs1g13620                                            | K05643 ATP-binding cassette, subfamily A (ABC1), member 3   (RefSeq) ABC transporter A family member 1 (A)                        | Pleiotropic drug resistance protein 1; NtPDR1 (At1g15520)                                                                                   | 3.228                 |
| Cs1g13660                                            | K05643 ATP-binding cassette, subfamily A (ABC1), member 3   (RefSeq) ABC transporter A family member 1 (A)                        | Pleiotropic drug resistance protein 1; NtPDR1 (At1g15520)                                                                                   | 1.056                 |
| Cs1g13680                                            | K05643 ATP-binding cassette, subfamily A (ABC1), member 3   (RefSeq) ABC transporter A family member 1 (A)                        | Pleiotropic drug resistance protein 1; NtPDR1 (At1g15520)                                                                                   | 3.542                 |
| Cs1g18920                                            | K05643 ATP-binding cassette, subfamily A (ABC1), member 3   (RefSeq) ABC transporter A family member 1 (A)                        | Pleiotropic drug resistance protein 1; NtPDR1 (At1g15520)                                                                                   | 7.490                 |
| Cs8g16470                                            | K05643 ATP-binding cassette, subfamily A (ABC1), member 3   (RefSeq) ABC transporter A family member 1 (A)                        | ABC transporter G family member 31; ABC transporter ABCG.31; AtABCG31; Pleiotropic drug resistance protein 3 (At2g29940)                    | 1.858                 |
| Cs8g20130                                            | K05643 ATP-binding cassette, subfamily A (ABC1), member 3   (RefSeq) ABC transporter A family member 1 (A)                        | ABC transporter G family member 31; ABC transporter ABCG.31; AtABCG31; Pleiotropic drug resistance protein 3 (At2g29940)                    | 2.541                 |
| Cs1g13640                                            | K05657 ATP-binding cassette, subfamily B (MDR/TAP), member 10   (RefSeq) ABC transporter B family member 28 isoform X1 (A)        | Pleiotropic drug resistance protein 1; NtPDR1 (At1g15520)                                                                                   | 1.574                 |
| Cs1g13730                                            | K05657 ATP-binding cassette, subfamily B (MDR/TAP), member 10   (RefSeq) ABC transporter B family member 28 isoform X1 (A)        | Pleiotropic drug resistance protein 1; NtPDR1 (At1g15520)                                                                                   | 2.274                 |
| Cs1g18930                                            | K05657 ATP-binding cassette, subfamily B (MDR/TAP), member 10   (RefSeq) ABC transporter B family member 28 isoform X1 (A)        | Pleiotropic drug resistance protein 1; NtPDR1 (At1g15520)                                                                                   | 2.657                 |
| Cs4g20440                                            | K05657 ATP-binding cassette, subfamily B (MDR/TAP), member 10   (RefSeq) ABC transporter B family member 28 isoform X1 (A)        | Pleiotropic drug resistance protein 1; NtPDR1 (At1g15520)                                                                                   | 2.065                 |
| Cs1g16850                                            | K05658 ATP-binding cassette, subfamily B (MDR/TAP), member 1 [EC:3.6.3.44]   (RefSeq) ABC transporter B family member 19-like (A) | ABC transporter B family member 19; ABC transporter ABCB.19; AtABCB19; Multidrug resistance protein 11; P-glycoprotein 19 (At3g28860)       | 10.369                |
| Cs1g20770                                            | K05658 ATP-binding cassette, subfamily B (MDR/TAP), member 1 [EC:3.6.3.44]   (RefSeq) ABC transporter B family member 15-like (A) | ABC transporter G family member 17; ABC transporter ABCG.17; AtABCG17; Probable white-brown complex homolog protein 17; AtWBC17 (At3g55100) | 5.422                 |
| Cs2g13730                                            | K05658 ATP-binding cassette, subfamily B (MDR/TAP), member 1 [EC:3.6.3.44]   (RefSeq) ABC transporter B family member 1 (A)       | ABC transporter G family member 7; ABC transporter ABCG.7; AtABCG7; White-brown complex homolog protein 7; AtWBC7 (At2g01320)               | -1.337                |
| Cs4g04420                                            | K05658 ATP-binding cassette, subfamily B (MDR/TAP), member 1 [EC:3.6.3.44]   (RefSeq) ABC transporter B family member 13-like (A) | ABC transporter I family member 17; ABC transporter ABCI.17; AtABCI17; MRP-related protein 1; Non-intrinsic ABC protein 3 (At1g67940)       | -2.366                |
| Cs4g11230                                            | K05658 ATP-binding cassette, subfamily B (MDR/TAP), member 1 [EC:3.6.3.44]   (RefSeq) putative multidrug resistance protein (A)   | Putative multidrug resistance protein; P-glycoprotein (At3g28345)                                                                           | 8.748                 |
| Cs5g13760                                            | K05658 ATP-binding cassette, subfamily B (MDR/TAP), member 1 [EC:3.6.3.44]   (RefSeq) ABC transporter B family member 11-like (A) | Pleiotropic drug resistance protein 3; NtPDR3 (At3g53480)                                                                                   | -2.126                |

|                 |                                                                                                                                   |                                                                                                                                                                                                                                           |        |
|-----------------|-----------------------------------------------------------------------------------------------------------------------------------|-------------------------------------------------------------------------------------------------------------------------------------------------------------------------------------------------------------------------------------------|--------|
| Cs5g17290       | K05658 ATP-binding cassette, subfamily B (MDR/TAP), member 1 [EC:3.6.3.44]   (RefSeq) putative multidrug resistance protein (A)   | ABC transporter G family member 11; ABC transporter ABCG.11; AtABCG11; Protein CUTICULAR DEFECT AND ORGAN FUSION 1; Protein DESPERADO; Protein PERMEABLE LEAVES 1; White-brown complex homolog protein 11; AtWBC11 (At1g17840)            | -3.672 |
| Cs6g13330       | K05658 ATP-binding cassette, subfamily B (MDR/TAP), member 1 [EC:3.6.3.44]   (RefSeq) ABC transporter B family member 15-like (A) | ABC transporter G family member 22; ABC transporter ABCG.22; AtABCG22; White-brown complex homolog protein 23; AtWBC23 (At3g52310)                                                                                                        | -4.735 |
| Cs6g20280       | K05658 ATP-binding cassette, subfamily B (MDR/TAP), member 1 [EC:3.6.3.44]   (RefSeq) ABC transporter B family member 15-like (A) | ABC transporter B family member 15; ABC transporter ABCB.15; AtABCB15; Multidrug resistance protein 13; P-glycoprotein 15 (At3g28345)                                                                                                     | 1.355  |
| Cs6g21110       | K05658 ATP-binding cassette, subfamily B (MDR/TAP), member 1 [EC:3.6.3.44]   (RefSeq) ABC transporter B family member 19 (A)      | ABC transporter B family member 19; ABC transporter ABCB.19; AtABCB19; Multidrug resistance protein 11; P-glycoprotein 19 (At3g28860)                                                                                                     | -2.269 |
| Cs7g09730       | K05658 ATP-binding cassette, subfamily B (MDR/TAP), member 1 [EC:3.6.3.44]   (RefSeq) putative multidrug resistance protein (A)   | Putative multidrug resistance protein; P-glycoprotein (At3g28345)                                                                                                                                                                         | 6.488  |
| Cs7g12620       | K05658 ATP-binding cassette, subfamily B (MDR/TAP), member 1 [EC:3.6.3.44]   (RefSeq) ABC transporter B family member 13-like (A) | ABC transporter G family member 21; ABC transporter ABCG.21; AtABCG21; White-brown complex homolog protein 21; AtWBC21 (At3g25620)                                                                                                        | -1.655 |
| Cs9g01170       | K05658 ATP-binding cassette, subfamily B (MDR/TAP), member 1 [EC:3.6.3.44]   (RefSeq) ABC transporter B family member 11-like (A) | ABC transporter B family member 11; ABC transporter ABCB.11; AtABCB11; Multidrug resistance protein 8; P-glycoprotein 11 (At1g02520)                                                                                                      | 3.117  |
| orange1.1t00127 | K05658 ATP-binding cassette, subfamily B (MDR/TAP), member 1 [EC:3.6.3.44]   (RefSeq) ABC transporter B family member 19-like (A) | ABC transporter G family member 19; ABC transporter ABCG.19; AtABCG19; White-brown complex homolog protein 19; AtWBC19 (At3g55130)                                                                                                        | 5.436  |
| orange1.1t01995 | K05658 ATP-binding cassette, subfamily B (MDR/TAP), member 1 [EC:3.6.3.44]   (RefSeq) ABC transporter B family member 13-like (A) | ABC transporter G family member 11; ABC transporter ABCG.11; AtABCG11; Protein CUTICULAR DEFECT AND ORGAN FUSION 1; Protein DESPERADO; Protein PERMEABLE LEAVES 1; White-brown complex homolog protein 11; AtWBC11 (At1g17840)            | 9.393  |
| Cs2g09560       | K05666 ATP-binding cassette, subfamily C (CFTR/MRP), member 2   (RefSeq) ABC transporter C family member 14 (A)                   | ABC transporter C family member 12; ABC transporter ABCC.12; AtABCC12; EC=3.6.3.44; ATP-energized glutathione S-conjugate pump 13; Glutathione S-conjugate-transporting ATPase 13; Multidrug resistance-associated protein 13 (At1g30410) | 1.646  |
| Cs2g28550       | K05666 ATP-binding cassette, subfamily C (CFTR/MRP), member 2   (RefSeq) ABC transporter C family member 3-like (A)               | WAT1-related protein At3g28050 (At3g28050)                                                                                                                                                                                                | 1.074  |
| Cs2g30530       | K05666 ATP-binding cassette, subfamily C (CFTR/MRP), member 2   (RefSeq) ABC transporter C family member 3-like (A)               | ABC transporter C family member 7; ABC transporter ABCC.7; AtABCC7; EC=3.6.3.44; ATP-energized glutathione S-conjugate pump 7; Glutathione S-conjugate-transporting ATPase 7; Multidrug resistance-associated protein 7 (At3g13080)       | 7.234  |
| Cs6g15280       | K05666 ATP-binding cassette, subfamily C (CFTR/MRP), member 2   (RefSeq) ABC transporter C family member 10-like (A)              | ABC transporter G family member 34; ABC transporter ABCG.34; AtABCG34; Pleiotropic drug resistance protein 6 (At2g36380)                                                                                                                  | 1.468  |

|                                               |                                                                                                                         |                                                                                                                                                                                                                                                     |                            |
|-----------------------------------------------|-------------------------------------------------------------------------------------------------------------------------|-----------------------------------------------------------------------------------------------------------------------------------------------------------------------------------------------------------------------------------------------------|----------------------------|
| Cs9g18650                                     | K05666 ATP-binding cassette, subfamily C (CFTR/MRP), member 2   (RefSeq)<br>ABC transporter C family member 10-like (A) | ABC transporter C family member 10; ABC transporter ABCC.10;<br>AtABCC10; EC=3.6.3.44; ATP-energized glutathione S-conjugate pump 14;<br>Glutathione S-conjugate-transporting ATPase 14; Multidrug resistance-<br>associated protein 14 (At3g59140) | 2.256                      |
| orange1.1t015<br>31                           | K05666 ATP-binding cassette, subfamily C (CFTR/MRP), member 2   (RefSeq)<br>ABC transporter C family member 10-like (A) | Pleiotropic drug resistance protein 2; NpPDR2 (At2g36380)                                                                                                                                                                                           | 9.938                      |
| orange1.1t027<br>65                           | K05674 ATP-binding cassette, subfamily C (CFTR/MRP), member 10  <br>(RefSeq) ABC transporter C family member 13 (A)     | ABC transporter C family member 13; ABC transporter ABCC.13;<br>AtABCC13; EC=3.6.3.44; ATP-energized glutathione S-conjugate pump 11;<br>Glutathione S-conjugate-transporting ATPase 11; Multidrug resistance-<br>associated protein 11 (At2g07680) | 1.139                      |
|                                               |                                                                                                                         |                                                                                                                                                                                                                                                     |                            |
| <b>Index</b>                                  | <b>Compounds</b>                                                                                                        |                                                                                                                                                                                                                                                     | <b>Log<sub>2</sub>(FC)</b> |
| <i>ABC transporters (ko02010, P = 0.0872)</i> |                                                                                                                         |                                                                                                                                                                                                                                                     |                            |
| pmf0138                                       | D-Mannose                                                                                                               |                                                                                                                                                                                                                                                     | -1.564                     |
| pme0014                                       | L-Glutamic acid                                                                                                         |                                                                                                                                                                                                                                                     | 1.760                      |
| pme1178                                       | Guanosine                                                                                                               |                                                                                                                                                                                                                                                     | -1.414                     |
| MWSmce119                                     | L-Arginine                                                                                                              |                                                                                                                                                                                                                                                     | -2.069                     |
| mws4170                                       | D-Glucose                                                                                                               |                                                                                                                                                                                                                                                     | -1.009                     |
| mws0668                                       | Xanthosine                                                                                                              |                                                                                                                                                                                                                                                     | -1.527                     |
| pme2527                                       | L-Ornithine                                                                                                             |                                                                                                                                                                                                                                                     | -2.285                     |
| mws0191                                       | Betaine                                                                                                                 |                                                                                                                                                                                                                                                     | 1.082                      |
| pme2292                                       | Putrescine                                                                                                              |                                                                                                                                                                                                                                                     | -2.478                     |
| pme0193                                       | L-Glutamine                                                                                                             |                                                                                                                                                                                                                                                     | -1.949                     |
| pme0010                                       | L-Serine                                                                                                                |                                                                                                                                                                                                                                                     | 2.086                      |
| pme1086                                       | GSH                                                                                                                     |                                                                                                                                                                                                                                                     | -5.022                     |
| mws0254                                       | L-Histidine                                                                                                             |                                                                                                                                                                                                                                                     | -3.006                     |
| pme1987                                       | L-Alanine                                                                                                               |                                                                                                                                                                                                                                                     | -1.018                     |
| pme0026                                       | L-Lysine                                                                                                                |                                                                                                                                                                                                                                                     | -1.935                     |
| pme2266                                       | Biotin                                                                                                                  |                                                                                                                                                                                                                                                     | 1.386                      |
| mws0232                                       | Riboflavin (Vitamin B2)                                                                                                 |                                                                                                                                                                                                                                                     | -1.104                     |
| pme0516                                       | Inositol                                                                                                                |                                                                                                                                                                                                                                                     | 1.657                      |
| pme0006                                       | L-Proline                                                                                                               |                                                                                                                                                                                                                                                     | -1.642                     |
| pme0021                                       | L-Phenylalanine                                                                                                         |                                                                                                                                                                                                                                                     | -1.064                     |

**Table S21.** Specific primer pairs used for qRT-PCR analysis

| ID        | Description                                                      | Forward primers (5' → 3') | Reverse primers (5' → 3') |
|-----------|------------------------------------------------------------------|---------------------------|---------------------------|
| Cs6g09520 |                                                                  | CTTCTGCGGATACCTCCTAATA    | TGATGCCAGTTCCACCTT        |
| Cs2g18580 | <i>Glyoxylate/succinic semialdehyde reductase 1</i>              | GGGAGGTCGGAAACGGAG        | ATCAAGTAAAGTGCGAGGGTC     |
| Cs5g25290 | <i>S-noroclaurine synthase</i>                                   | TGTTGGCACCATTCTTCACC      | AAATCCCACATCCAGATACCC     |
| Cs6g13560 | <i>Nuclear transcription factor Y subunit A-10</i>               | CTTTCTTTCCTGGCGATGTC      | AGATGGCGTGAAATGGTGC       |
| Cs3g19960 | <i>Metal transporter Nramp5</i>                                  | CGGCAGCAACCGCATAG         | GCAAGCAACCACAAGCAATA      |
| Cs5g07300 | <i>Probable inactive purple acid phosphatase 27</i>              | ACTGTGCGTGCTGTTGTGC       | GAAGCCGAGTCGTGAAAGG       |
| Cs7g04580 | <i>Glutathione S-transferase U17</i>                             | AACCCTGTTTACAAGAAAATCC    | CCTCCAGCAAAACCAAGACT      |
| Cs2g06200 | <i>Allantoinase</i>                                              | GGACACGAGGACAGATGGC       | GGCACGGTTGGTGAATGA        |
| Cs4g02830 | <i>Glutamate receptor 2.7</i>                                    | TTCATCCCCAGTTGGTTCC       | TGGCGATTGTCCCGTTTA        |
| Cs4g07410 | <i>Thiol protease aleurain</i>                                   | GAAGATTACGAGTCCGTTGAG     | GATTTCTTTTGTAGTGGCAGA     |
| Cs4g18790 | <i>Vacuolar-processing enzyme</i>                                | ACAACCTGCGGACAGAAACTC     | CTCAGGTGCCTTGCGGTA        |
| Cs6g06070 | <i>UNC93-like protein 3</i>                                      | AGCACGATACGGAAGGAGC       | CACAGATACCCACAACCATAACA   |
| Cs7g07780 |                                                                  | TGTCTGCTGCTTTTCTCGTC      | GCTGCTAATCCACCCGTAA       |
| Cs7g10260 | <i>3-oxoacyl-[acyl-carrier-protein] reductase, chloroplastic</i> | CAAATCGGCGGCTACTTC        | TTGGTTGCTTGTTCTATGGTG     |
| Cs9g08730 | <i>Cellulose synthase-like protein G2</i>                        | GCCTATGCTGACCTTGGAAT      | TGGGGAAAGATGAACTTGAAAC    |
| Cs9g05330 | <i>Major allergen Pru ar 1</i>                                   | CACCGCAAGCATTCAAGAG       | GCAACTGCCAAGATCCCAT       |
| Cs6g18360 | <i>Putative glutamine amidotransferase GAT1_2.1</i>              | ATCCTCCCTCGTGTTCTCATC     | TGCCCCGTAACCGACTATA       |
| Cs1g16180 | <i>Aspartyl protease AED3</i>                                    | CATTAGGGTTGGCAGAAGAGT     | AGTGCTGTGGATTAGAAGGTTG    |
| Cs5g28410 | <i>Non-symbiotic hemoglobin 1</i>                                | GGGATGGATCATTGAAGGG       | TCATAACAAAGACAGTCGTGGC    |
| Cs5g03460 | <i>Probable aquaporin PIP1-2</i>                                 | ATGGAGGGCAAAGAAGAGG       | GGATACCGACAGTGGAGCA       |
| Cs2g03110 | <i>Peroxidase 42</i>                                             | AGAGTGCCCTGGTGTGTTT       | CCTTGGGGTCTGGGATTG        |
| Cs5g33470 | <i>Sucrose synthase 2</i>                                        | GCTCAAACAAATAGGGCACG      | GAACAGACTTCACCAAATCACG    |
| Cs1g20920 | <i>Phosphoenolpyruvate carboxykinase (ATP)</i>                   | GTGGTTGCTATGCCAAGTGC      | CATTGTTTGTGCCAGGTTTACG    |
| Cs2g19350 | <i>Fasciclin-like arabinogalactan protein 2</i>                  | AGTCGGTGGCTGAGTTTCC       | GGCTTCCGTTAGGTTCTTGT      |
| Cs5g32270 | <i>Peroxidase 3</i>                                              | AAATGCCGCCAGTAACCC        | TGAAACAGAATCCCTTGTAACC    |
| Cs6g13810 | <i>NDR1/HIN1-like protein 1</i>                                  | TTGACCTTTACGCCACTTACC     | CCGACTTTCCATCTGACCC       |
| Cs9g14320 | <i>21 kDa protein</i>                                            | CCCAATCCGCAAAGTCAT        | ACAGTGTCACCCATCTCATCTAA   |
| Cs1g05000 | <i>Actin</i>                                                     | AGAACTATGAACTGCCTGATGGC   | GCTTGGAGCAAGTGCTGTGATT    |
| Cs7g08440 | <i>U4/U6 small nuclear ribonucleoprotein PRP31 (PRPF31)</i>      | ACTCATGGGAACGGCTGGTGGTC   | TCGGCAGGCACGCATCCTTAGAG   |
