# Supplementary material for: An Integrated Analysis of Metabolome, Transcriptome, and Physiology Revealed the Molecular and Physiological Response of Citrus sinensis Roots to Prolonged Nitrogen Deficiency
Source: Plants (Basel). 2023 Jul 18;12(14):2680. doi: 10.3390/plants12142680 (PMC10383776; doi:10.3390/plants12142680)
Supplement: Supplementary file 1 [file plants-12-02680-s001.zip › 2023LaiPlantsSupplementary Tables 1,3,6-90708.xlsx]

## Sheet: Table S1
Table S1. List of all metabolites identified in C. sinensis roots
Index	Formula	Compounds	Class I	Class II	CAS	Level	RCK-1	RCK-2	RCK-3	RD-1	RD-2	RD-3	VIP	p_value	FDR	Fold_Change	Log2FC	Type
pmb0782	C5H11N	Piperidine	Alkaloids	Alkaloids	110-89-4	2	2865400	1907200	1744600	1451400	1492100	1661100	0.928813	0.206774	0.333291	0.70653	-0.501176	insig
pme1974	C3H4O3	Pyruvic acid	Organic acids	Organic acids	127-17-3	2	25332	19945	12527	24075	29251	12252	0.190637	0.701528	0.770692	1.13449	0.182043	insig
pme2292	C4H12N2	Putrescine	Alkaloids	Phenolamine	110-60-1	2	2398200	3362200	3210800	739880	564050	306040	1.26116	0.00697048	0.0470136	0.17946	-2.47827	down
pme1987	C3H7NO2	L-Alanine	Amino acids and derivatives	Amino acids and derivatives	56-41-7	2	7305.5	6883.7	6283.3	3244.6	4683.5	2181	1.13635	0.0278682	0.0971158	0.493789	-1.01803	down
ML10198895	C3H7NO2	N-Methylglycine	Amino acids and derivatives	Amino acids and derivatives	107-97-1	2	4756.4	9092.8	6220.6	7920.9	2769.9	3962.6	0.61945	0.421981	0.526789	0.730122	-0.453791	insig
pme2601	C3H6O3	3-Hydroxypropanoic acid	Organic acids	Organic acids	503-66-2	2	28541	29578	23525	18517	16799	20129	1.19093	0.0255199	0.0954133	0.679107	-0.55829	insig
Zmyn000268	C3H6O3	2,3-Dihydroxypropanal	Others	Saccharides and Alcohols	56-82-6	2	31331	29625	18660	26003	19446	29928	0.12844	0.792808	0.846195	0.946757	-0.078934	insig
pma6298	C5H5NO	3-Hydroxypyridine	Alkaloids	Alkaloids	109-00-2	2	71063	106380	110570	38494	43473	49925	1.21585	0.045544	0.128745	0.457938	-1.12678	down
Lmgn000219	C4H6O3	Succinic semialdehyde	Organic acids	Organic acids	692-29-5	2	16643	15972	14842	33427	36704	32076	1.30295	0.00230381	0.0342332	2.15368	1.1068	up
pmf0256	C6H14O	3-Methyl-1-pentanol	Others	Saccharides and Alcohols	589-35-5	2	282650	330860	237820	157140	192640	164000	1.1996	0.0379976	0.116944	0.603503	-0.728568	insig
pme1841	C5H14N2	Cadaverine	Alkaloids	Phenolamine	462-94-2	2	8036.6	7362.3	9943	15080	13336	5673.7	0.41	0.421186	0.526789	1.34519	0.427811	insig
pme3011	C4H9NO2	γ-Aminobutyric acid	Organic acids	Organic acids	20791	2	7199700	4522700	4975600	3709300	3580300	2505100	1.07002	0.0912646	0.191595	0.586579	-0.769602	insig
pme3017	C4H9NO2	2-Aminoisobutyric acid	Amino acids and derivatives	Amino acids and derivatives	62-57-7	2	8258000	7781200	9310300	5842300	6237900	6827700	1.18243	0.0220825	0.0886095	0.745888	-0.422968	insig
pme3033	C4H9NO2	N,N-Dimethylglycine	Amino acids and derivatives	Amino acids and derivatives	1118-68-9	2	5492300	3554300	3932700	2523900	2573100	2088500	1.16954	0.0744488	0.167671	0.553612	-0.853052	insig
pmb0484	C5H13NO	Choline	Alkaloids	Alkaloids	62-49-7	1	13381000	12302000	14966000	9467900	10472000	10699000	1.179	0.032239	0.105358	0.753743	-0.407855	insig
Lmbn000193	C3H4O4	Tartronate semialdehyde*	Organic acids	Organic acids	2480-77-5	2	186230	176380	173960	101980	127670	93201	1.23678	0.0124951	0.0649335	0.601694	-0.732898	insig
ML10172161	C3H4O4	Hydroxypyruvic acid*	Organic acids	Organic acids	1113-60-6	2	172130	156550	145200	93286	110890	117770	1.19623	0.00913001	0.0555926	0.679383	-0.557703	insig
mws0576	C4H8O3	3-Hydroxybutyric acid	Organic acids	Organic acids	300-85-6	2	1491800	1376600	1217800	1158100	1150600	1187300	1.0275	0.128935	0.242326	0.855563	-0.225055	insig
mws0574	C4H8O3	2-Hydroxyisobutyric acid*	Organic acids	Organic acids	594-61-6	2	45425	74744	61608	39116	25799	35584	1.10611	0.0671438	0.159473	0.55287	-0.854989	insig
mws0206	C4H8O3	2-Hydroxybutyric Acid*	Organic acids	Organic acids	3347-90-8	2	48334	73215	74622	27043	21085	27272	1.24474	0.0361597	0.113118	0.384359	-1.37948	down
pme1975	C3H4O4	Malonic acid	Organic acids	Organic acids	141-82-2	2	1883300	1700000	1548400	1299200	1295400	1452800	1.1287	0.044749	0.127414	0.788705	-0.342441	insig
ML10175762	C8H8	Styrene	Others	Others	100-42-5	2	205900	295360	322600	182490	147520	184970	1.09197	0.0872437	0.185613	0.625082	-0.677883	insig
pme0010	C3H7NO3	L-Serine	Amino acids and derivatives	Amino acids and derivatives	56-45-1	1	226820	210560	168570	665060	995260	912610	1.28969	0.0195855	0.0827812	4.24611	2.08614	up
pme2433	C4H11NO2	Diethanolamine	Alkaloids	Alkaloids	111-42-2	2	31879	20615	26720	34302	45941	42268	1.09152	0.0381919	0.117163	1.54658	0.629084	insig
pme2367	C6H4O2	1,4-Benzoquinone	Quinones	Quinones	106-51-4	2	855480	760840	701610	871390	794930	724110	0.253221	0.715648	0.779406	1.03128	0.0444332	insig
mws0255	C4H5N3O	Cytosine	Nucleotides and derivatives	Nucleotides and derivatives	71-30-7	1	92628	118350	125700	140600	116040	107090	0.380626	0.559203	0.651718	1.08035	0.111498	insig
pme0257	C4H4N2O2	Uracil	Nucleotides and derivatives	Nucleotides and derivatives	66-22-8	2	543700	759270	801910	920460	1011800	1034100	1.06611	0.0525683	0.141222	1.40928	0.494956	insig
pme1936	C4H7N3O	Creatinine	Organic acids	Organic acids	60-27-5	2	57723	50569	56254	50197	51783	46488	0.926532	0.123966	0.235652	0.902289	-0.148339	insig
pme0006	C5H9NO2	L-Proline	Amino acids and derivatives	Amino acids and derivatives	147-85-3	1	25831000	31919000	29798000	9132600	9780700	9145400	1.3087	0.00733478	0.0487788	0.320495	-1.64163	down
mws0376	C4H4O4	Fumaric acid	Organic acids	Organic acids	110-17-8	2	2068600	2029900	2371600	1548700	1492100	1349900	1.25391	0.0101548	0.0568591	0.678614	-0.559337	insig
pme0275	C5H8O3	4-Oxopentanoic Acid	Organic acids	Organic acids	123-76-2	2	35466	33120	29823	36427	34943	30343	0.271176	0.677367	0.751664	1.03357	0.0476419	insig
mws0823	C5H8O3	3-Methyl-2-Oxobutanoic acid	Organic acids	Organic acids	759-05-7	2	200840	165790	156330	232900	201360	166050	0.621148	0.34222	0.464922	1.14791	0.199007	insig
pme3193	C4H7NO3	N-Acetyl-L-glycine	Amino acids and derivatives	Amino acids and derivatives	543-24-8	2	13659	12650	10021	19273	12102	15049	0.770577	0.246742	0.373056	1.27784	0.353709	insig
pme0066	C3H7N3O2	Guanidinoacetate	Amino acids and derivatives	Amino acids and derivatives	352-97-6	2	11239	11818	13437	14587	18592	15882	1.12258	0.0502505	0.137323	1.34436	0.426917	insig
pmb1096	C8H7N	Indole	Alkaloids	Plumerane	120-72-9	1	20744	17852	21081	19780	18161	17381	0.654402	0.315826	0.438467	0.927024	-0.109322	insig
mws2628	C5H11NO2	N-Methyl-4-aminobutyric acid	Organic acids	Organic acids	1119-48-8	2	24353	40210	33364	6437.1	9787.6	12085	1.22985	0.026241	0.0956138	0.28909	-1.79041	down
pme0120	C5H11NO2	5-Aminovaleric acid	Amino acids and derivatives	Amino acids and derivatives	660-88-8	2	68885	56228	46728	45468	58464	24178	0.691635	0.297626	0.418725	0.745515	-0.423691	insig
mws0256	C5H11NO2	L-Valine	Amino acids and derivatives	Amino acids and derivatives	72-18-4	1	54251000	46885000	45150000	38887000	40115000	39987000	1.14041	0.0798133	0.175215	0.8134	-0.297963	insig
mws0191	C5H11NO2	Betaine	Alkaloids	Alkaloids	107-43-7	1	373220	472960	543240	902750	1035600	1003000	1.25435	0.00147422	0.0330542	2.11696	1.082	up
pme2923	C4H6O4	Acetoxyacetic acid	Organic acids	Organic acids	13831-30-6	2	195940	154790	154940	125870	137240	124510	1.09877	0.0925941	0.193035	0.766547	-0.383553	insig
mws0470	C4H6O4	Methylmalonic acid*	Organic acids	Organic acids	516-05-2	1	55215000	43463000	46591000	31222000	27250000	21843000	1.21516	0.00956425	0.0561457	0.552871	-0.854986	insig
mws0192	C4H6O4	Succinic acid*	Organic acids	Organic acids	110-15-6	1	55579000	43614000	45695000	30333000	26588000	22161000	1.22897	0.0112782	0.0605963	0.545815	-0.873517	insig
pme1730	C4H6O4	D-Erythronolactone	Organic acids	Organic acids	15667-21-7	2	38291	26811	34546	22588	14619	6677.9	1.03518	0.0351782	0.111515	0.440399	-1.18312	down
mws0147	C5H10O3	β-Hydroxyisovaleric acid	Organic acids	Organic acids	625-08-1	2	2599300	2071100	2037500	631470	608620	557510	1.30346	0.01125	0.0605963	0.267983	-1.89979	down
pme3096	C3H5NO4	Aminomalonic acid	Organic acids	Organic acids	1068-84-4	2	1821600	1483100	1584300	1051800	877560	719050	1.22324	0.0058126	0.0441753	0.541708	-0.884413	insig
mws0671	C4H9NO3	L-Homoserine	Organic acids	Organic acids	672-15-1	2	20778	14682	43590	720220	916660	914720	1.2942	0.00549918	0.0434224	32.2783	5.01249	up
pmp001287	C8H9N	N-Benzylmethylene isomethylamine	Alkaloids	Alkaloids	-	1	7155400	5627700	5675800	3093900	2990700	2627300	1.27591	0.0170837	0.0796402	0.471962	-1.08326	down
pma0134	C4H8O4	D-(-)-Threose	Others	Saccharides and Alcohols	95-43-2	2	914720	507830	494580	186260	148700	162840	1.24802	0.074557	0.167671	0.259659	-1.94531	down
Lmbp000728	C8H8O	(S)-2-Phenyloxirane	Others	Others	20780-54-5	1	61404000	41070000	35764000	11751000	9409800	7998500	1.27431	0.0408933	0.120775	0.210935	-2.24513	down
pme0195	C3H7NO2S	L-Cysteine	Amino acids and derivatives	Amino acids and derivatives	52-90-4	2	83273	73427	98968	9	9	9	1.31523	0.00753138	0.0492004	0.000105606	-13.209	down
pmb0069	C7H7NO	Benzamide	Phenolic acids	Phenolic acids	55-21-0	2	21525000	12332000	16351000	1620100	1199600	1326900	1.29974	0.0285164	0.0982771	0.0825884	-3.59792	down
mws0491	C8H11N	Phenethylamine	Alkaloids	Alkaloids	64-04-0	2	95054000	61517000	73586000	8001200	5562200	6086000	1.3026	0.0185101	0.081308	0.0853739	-3.55006	down
mws0628	C7H6O2	4-Hydroxybenzaldehyde	Phenolic acids	Phenolic acids	123-08-0	1	6714300	5327500	5941800	3685000	3835700	3851400	1.25453	0.0297633	0.100384	0.632359	-0.661183	insig
mws0133	C6H6N2O	Nicotinamide	Others	Vitamin	98-92-0	1	4335800	4048600	4771500	2360200	2680400	2661000	1.27832	0.00490468	0.0432191	0.58541	-0.77248	insig
ML10179289	C8H10O	2-Phenylethanol	Phenolic acids	Phenolic acids	22258	2	9	9	9	1723900	1666400	1689900	1.31551	9.71354e-05	0.010264	188156	17.5216	up
Lmbp000668	C6H5NO2	Isonicotinic acid	Organic acids	Organic acids	55-22-1	2	423350	526450	575170	440170	425980	417190	0.88763	0.21164	0.339982	0.841551	-0.248877	insig
pme0490	C6H5NO2	Nicotinic acid (Vitamin B3)	Others	Vitamin	59-67-6	1	373170	408790	522300	355200	382950	376440	0.770881	0.293532	0.415183	0.854577	-0.226718	insig
mws0236	C2H7NO3S	2-Aminoethanesulfonic acid	Organic acids	Organic acids	107-35-7	2	16199	25566	20610	28720	33130	25446	0.975095	0.0791489	0.174337	1.39954	0.484948	insig
mws0982	C6H11N3	1-Methylhistamine	Alkaloids	Alkaloids	501-75-7	2	26226	19397	24562	19361	19064	16280	0.988519	0.112542	0.218423	0.77944	-0.35949	insig
mws0251	C5H6N2O2	Thymine	Nucleotides and derivatives	Nucleotides and derivatives	65-71-4	2	111680	89373	136010	74747	78369	63321	1.11313	0.0838352	0.181611	0.642126	-0.639071	insig
MWSmce709	C9H7N	Isoquinoline	Alkaloids	Isoquinoline alkaloids	119-65-3	2	79990	45846	50967	70400	93933	43917	0.329485	0.592928	0.682657	1.17786	0.236174	insig
Rfmb319	C6H11NO2	Pipecolic acid*	Amino acids and derivatives	Amino acids and derivatives	4043-87-2	1	56890000	64517000	64574000	19094000	14363000	17465000	1.30268	0.000496997	0.0245798	0.273802	-1.86879	down
ML10181668	C6H11NO2	Cycloleucine*	Amino acids and derivatives	Amino acids and derivatives	52-52-8	1	5603700	6734100	6438800	1616600	1190600	1377500	1.30458	0.0020386	0.033426	0.222868	-2.16574	down
Zmdp000376	C5H11N3O	4-Guanidinobutanal	Amino acids and derivatives	Amino acids and derivatives	-	1	5273400	6244400	5941600	1429900	1055500	1380600	1.30252	0.00130795	0.0327463	0.221428	-2.17509	down
mws0425	C5H6O4	Citraconic acid	Organic acids	Organic acids	498-23-7	2	588190	788600	1251700	156930	217560	161130	1.25887	0.0695928	0.16341	0.203775	-2.29495	down
Zmgn000217	C5H6O4	Methylenesuccinic acid	Organic acids	Organic acids	97-65-4	2	108090	66712	120770	115460	128310	135220	0.791878	0.224571	0.349537	1.28223	0.35865	insig
pme2693	C6H14N2O	N-Acetylputrescine	Alkaloids	Phenolamine	18233-70-0	2	132330	143310	193840	58887	44830	36053	1.26507	0.0192368	0.0824065	0.297712	-1.74801	down
pmb0501	C5H14N4	Agmatine	Alkaloids	Phenolamine	306-60-5	2	12415	7936.1	7581.9	5428.3	5130.3	4931.5	1.13901	0.115324	0.222913	0.554545	-0.850624	insig
mws0216	C5H9NO3	Trans-4-Hydroxy-L-proline*	Amino acids and derivatives	Amino acids and derivatives	51-35-4	2	18315000	13255000	12182000	8665600	9689600	6325400	1.11881	0.0581271	0.147018	0.564102	-0.825971	insig
pma3649	C5H9NO3	5-Aminolevulinate*	Alkaloids	Alkaloids	106-60-5	2	3582800	2329400	2299900	1575600	1740000	1423400	1.12861	0.105484	0.20899	0.577075	-0.793169	insig
Zmpn000638	C4H9N3O2	3-Guanidinopropionic acid	Organic acids	Organic acids	353-09-3	2	475970	286730	249430	111580	91570	122730	1.21882	0.0801459	0.175215	0.321974	-1.63498	down
ML10197929	C4H9N3O2	Creatine	Others	Others	57-00-1	2	961160	497010	464620	157720	135650	134460	1.24623	0.0895229	0.188557	0.222505	-2.16809	down
mws0258	C6H13NO2	L-Isoleucine*	Amino acids and derivatives	Amino acids and derivatives	73-32-5	1	37407000	26209000	23584000	17762000	16309000	16182000	1.1539	0.0988092	0.199223	0.576296	-0.795118	insig
mws1587	C6H13NO2	L-Norleucine	Amino acids and derivatives	Amino acids and derivatives	327-57-1	1	37300000	26734000	23341000	18037000	16526000	15309000	1.15331	0.0921529	0.193034	0.570781	-0.80899	insig
mws0227	C6H13NO2	L-Leucine*	Amino acids and derivatives	Amino acids and derivatives	61-90-5	2	36992000	26723000	22953000	18509000	16819000	15291000	1.13467	0.0969828	0.197909	0.584056	-0.77582	insig
pme0274	C6H13NO2	6-Aminocaproic acid	Organic acids	Organic acids	60-32-2	2	3018700	1987800	1935400	1561500	1751100	1764500	0.908099	0.217131	0.343211	0.73137	-0.451326	insig
pmp001198	C6H13NO2	6-Deoxyfagomine	Alkaloids	Alkaloids	197449-09-5	1	3398000	2566200	2351100	1948800	1695700	1923000	1.11344	0.095135	0.19583	0.669549	-0.578739	insig
Lmbn001364	C5H8O4	4-Hydroxy-2-Oxopentanoic Acid*	Organic acids	Organic acids	3318-73-8	1	436550	266300	257920	308300	225790	215960	0.642207	0.361093	0.482737	0.780676	-0.357204	insig
Lmmn000806	C5H8O4	Dimethylmalonic acid*	Organic acids	Organic acids	595-46-0	1	435920	250600	265740	284100	226980	199810	0.724576	0.309561	0.431661	0.746529	-0.421729	insig
Lmbn001288	C5H8O4	2-Hydroxy-2-methyl-3-oxobutanoic acid*	Organic acids	Organic acids	71698-08-3	1	453340	264440	286010	283900	246170	219060	0.769905	0.288779	0.409893	0.746302	-0.422169	insig
Lmmn002164	C5H8O4	Monomethyl succinate*	Organic acids	Organic acids	3878-55-5	2	54858	46998	53252	60987	55793	36351	0.152781	0.939745	0.955826	0.987254	-0.0185067	insig
mws0473	C5H8O4	2-Methylsuccinic acid*	Organic acids	Organic acids	498-21-5	1	884150	613740	669530	822830	704590	569490	0.138276	0.841719	0.878677	0.967468	-0.0477138	insig
pme0243	C5H8O4	Glutaric acid	Organic acids	Organic acids	110-94-1	2	797200	579620	710550	776760	666640	524570	0.281789	0.701807	0.770692	0.942799	-0.0849781	insig
Lmgn000160	C4H8N2O3	3-Ureidopropionic Acid	Organic acids	Organic acids	462-88-4	2	3529800	3563300	3228200	367210	375190	368900	1.31491	0.00119641	0.0316052	0.107671	-3.2153	down
mws1503	C9H8O	Cinnamaldehyde	Phenolic acids	Phenolic acids	104-55-2	2	50967	33895	35975	42942	40910	39032	0.175881	0.911708	0.934305	1.01694	0.0242348	insig
pme2527	C5H12N2O2	L-Ornithine	Amino acids and derivatives	Amino acids and derivatives	70-26-8	2	305040	326630	162700	53395	59548	50044	1.26178	0.0544448	0.141855	0.205178	-2.28505	down
mws0219	C4H7NO4	L-Aspartic Acid	Amino acids and derivatives	Amino acids and derivatives	56-84-8	1	5802100	6144200	6264700	4701800	5398400	5130900	1.16982	0.0199039	0.083285	0.836368	-0.25779	insig
MWS1709	C4H6O5	D-Malic acid	Organic acids	Organic acids	636-61-3	1	21943000	14874000	13372000	18350000	13847000	12940000	0.322844	0.623717	0.709873	0.89934	-0.153061	insig
mws0275	C4H6O5	L-Malic acid*	Organic acids	Organic acids	97-67-6	1	770630	537010	503600	669400	539240	466650	0.269938	0.684594	0.757034	0.924941	-0.112567	insig
Lmbn000198	C4H6O5	3-Dehydro-L-Threonic Acid*	Organic acids	Organic acids	-	1	21883000	14561000	13458000	19356000	14407000	13139000	0.177196	0.775408	0.831356	0.939882	-0.0894482	insig
Zmgn000503	C5H10O4	2,3-Dihydroxy-3-Methylbutanoic Acid	Organic acids	Organic acids	1756-18-9	2	6162000	3828200	3665300	6752200	5740900	5117100	0.793227	0.247536	0.373171	1.2896	0.366929	insig
pme0040	C5H5N5	Adenine	Nucleotides and derivatives	Nucleotides and derivatives	73-24-5	1	3747400	3577500	4712200	1525300	1584300	1440500	1.29485	0.0183266	0.081063	0.378006	-1.40352	down
pmb0374	C5H5N5	2-Aminopurine	Nucleotides and derivatives	Nucleotides and derivatives	452-06-2	1	249910	257830	244660	150430	143440	119320	1.2844	0.00272139	0.0366959	0.549163	-0.864695	insig
Lmgp000659	C8H9NO	2-Phenylacetamide*	Alkaloids	Alkaloids	103-81-1	2	2938600	2289500	2004700	1458900	1342800	1408600	1.2018	0.0656568	0.157279	0.582112	-0.780631	insig
HJKP000649	C8H9NO	N-benzylformamide*	Alkaloids	Alkaloids	6343-54-0	2	3221200	2497500	2271200	1615500	1553200	1532800	1.21446	0.0609942	0.150273	0.58843	-0.765056	insig
mws0889	C4H8O5	D-Threonic Acid	Others	Saccharides and Alcohols	734111	2	744750	347280	367510	1224400	833330	632380	0.942636	0.137073	0.254105	1.84312	0.882151	insig
MWS1848	C8H8O2	Phenyl acetate	Phenolic acids	Phenolic acids	122-79-2	2	840600	589820	620380	745300	507200	575010	0.445091	0.522064	0.619056	0.891121	-0.166308	insig
MWSmce466	C8H8O2	4'-Hydroxyacetophenone	Amino acids and derivatives	Amino acids and derivatives	99-93-4	2	680700	522200	567900	627100	504330	508510	0.439568	0.521101	0.618685	0.926101	-0.110758	insig
pme2268	C7H7NO2	Trigonelline	Alkaloids	Alkaloids	535-83-1	1	2435900	1646200	1758900	6797700	5692500	6479600	1.28769	0.000646273	0.0256086	3.2477	1.69942	up
mws1078	C7H7NO2	Anthranilic Acid	Phenolic acids	Phenolic acids	118-92-3	2	218050	246910	326920	128170	245990	116120	0.935444	0.133029	0.247772	0.619134	-0.691676	insig
pma0948	C8H11NO	Phenylethanolamine	Alkaloids	Alkaloids	7568-93-6	2	15090000	9705500	7624300	2647000	2185000	1934500	1.26338	0.0602918	0.150033	0.208715	-2.26039	down
pme1002	C8H11NO	L-Tyramine	Amino acids and derivatives	Amino acids and derivatives	51-67-2	1	41939000	27857000	23176000	7773000	6025100	5480500	1.27146	0.0469756	0.130244	0.207359	-2.2698	down
mws0749	C7H6O3	4-Hydroxybenzoic acid	Phenolic acids	Phenolic acids	99-96-7	2	7053900	6905900	7955600	4122400	4035000	3721500	1.29789	0.00466897	0.0432191	0.542034	-0.883544	insig
Hmgn001653	C7H6O3	Protocatechualdehyde*	Phenolic acids	Phenolic acids	139-85-5	2	5194700	5130000	5965200	2814300	2834800	2612400	1.30056	0.00679793	0.0465096	0.507155	-0.979502	insig
Lmbn001981	C7H6O3	2,5-Dihydroxybenzaldehyde*	Phenolic acids	Phenolic acids	1194-98-5	2	5126900	5603900	6440100	2939900	2707700	2689500	1.29258	0.0135873	0.0677943	0.485537	-1.04235	down
Lmgn001670	C7H6O3	Salicylic acid	Phenolic acids	Phenolic acids	69-72-7	2	107980	173860	140690	187520	166430	159270	0.752948	0.249801	0.374702	1.21464	0.280524	insig
Lmbn002862	C7H6O3	3-Hydroxybenzoic Acid	Organic acids	Organic acids	36320	2	503380	470920	491220	429730	502190	483790	0.430845	0.538793	0.634934	0.966012	-0.0498869	insig
pme1137	C6H5NO3	6-Hydroxynicotinic acid	Alkaloids	Alkaloids	5006-66-6	2	39196	41195	51334	57411	63119	50911	1.02875	0.0622852	0.152663	1.30151	0.380183	insig
pme2828	C6H5NO3	4-Nitrophenol	Phenolic acids	Phenolic acids	100-02-7	2	57183000	59812000	49839000	61670000	59513000	63234000	0.880002	0.179422	0.305789	1.10539	0.144558	insig
mws0704	C2H8NO4P	O-Phosphorylethanolamine	Alkaloids	Alkaloids	1071-23-4	2	47623	26485	30093	119950	124960	115240	1.26975	0.00197511	0.033426	3.4563	1.78923	up
pma2987	C6H11N3O	Histidinol	Alkaloids	Alkaloids	501-28-0	2	7493500	7307100	6912900	7026000	7795400	6929300	0.00905217	0.971555	0.979798	1.00171	0.00246954	insig
pme3207	C6H6O4	Muconic acid	Organic acids	Organic acids	1119-72-8	2	2428300	2374100	1934400	2244900	2187700	2190100	0.104059	0.831125	0.872406	0.983063	-0.024644	insig
pmb0764	C6H9NOS	4-Methyl-5-thiazoleethanol	Others	Others	137-00-8	1	266520	250100	285370	127040	117250	115730	1.30686	0.00215004	0.0335195	0.448908	-1.15551	down
MWSmce157	C7H13NO2	Stachydrine	Alkaloids	Alkaloids	471-87-4	1	13642000	10990000	10627000	6609800	5260800	5665900	1.25928	0.0141723	0.0701971	0.497362	-1.00763	down
Hmsp000364	C7H13NO2	L-Cyclopentylglycine	Amino acids and derivatives	Amino acids and derivatives	2521-84-8	2	28101000	23783000	23366000	13239000	10264000	11482000	1.27599	0.00370542	0.0415225	0.464917	-1.10496	down
mws0340	C6H8O4	2,3-Dimethylsuccinic acid	Amino acids and derivatives	Amino acids and derivatives	13545-04-5	2	6673.5	8861.6	12161	9	9	9	1.31442	0.0286254	0.0982771	0.000974866	-10.0025	down
Rfmb318	C7H14NO2+	D-Proline betaine	Amino acids and derivatives	Amino acids and derivatives	1195-94-4	2	946800	749420	753340	448870	330840	342550	1.25427	0.00818284	0.0516888	0.458148	-1.12612	down
Hmmp002124	C9H7NO	Indole-3-carboxaldehyde	Alkaloids	Plumerane	487-89-8	2	92107	103080	103040	1012600	1082800	1228800	1.31389	0.00386591	0.0415691	11.1465	3.47852	up
pme0295	C6H11NO3	4-Acetamidobutyric acid	Organic acids	Organic acids	3025-96-5	2	446240	271710	335760	152930	132250	115930	1.24177	0.0455711	0.128745	0.380665	-1.39341	down
mws0567	C5H11N3O2	4-Guanidinobutyric acid	Organic acids	Organic acids	463-00-3	1	387130	478240	530600	18681000	23575000	22406000	1.31275	0.00483273	0.0432191	46.3205	5.53358	up
mws0017	C7H19N3	Spermidine	Alkaloids	Phenolamine	124-20-9	2	61686	146790	156870	173430	99358	71972	0.0981437	0.880325	0.911971	0.943653	-0.083671	insig
pme2380	C5H6O5	α-Ketoglutaric acid	Organic acids	Organic acids	328-50-7	2	1961700	1639500	1511900	4273900	3662300	3623900	1.28325	0.00202876	0.033426	2.26088	1.17688	up
Lmgn000224	C5H6O5	2-Methyl-3-oxosuccinic acid	Organic acids	Organic acids	-	2	111700	117440	144460	318140	329530	282790	1.28699	0.000708302	0.0259075	2.49052	1.31645	up
mws1012	C9H6O2	Coumarin	Lignans and Coumarins	Coumarins	91-64-5	2	10274	12448	8545.5	9100.3	10686	12506	0.172604	0.830951	0.872406	1.03278	0.0465263	insig
Wmzn000227	C6H10O4	2,2-Dimethylsuccinic acid	Organic acids	Organic acids	597-43-3	2	45848	59708	55855	41949	40218	34142	1.13069	0.0469194	0.130244	0.720577	-0.472776	insig
mws0924	C6H10O4	2-Methylglutaric acid*	Organic acids	Organic acids	617-62-9	2	1169300	844410	804140	498280	356640	352870	1.22663	0.0294391	0.100346	0.428621	-1.22223	down
mws0208	C6H10O4	Adipic Acid*	Organic acids	Organic acids	124-04-9	2	1284700	926410	907580	487990	402430	401390	1.25883	0.0326556	0.105991	0.414216	-1.27155	down
Lmbn001609	C6H10O4	2-Acetyl-2-Hydroxybutanoic Acid	Organic acids	Organic acids	-	2	67966	52023	48583	28332	29655	18385	1.20008	0.0180033	0.081063	0.453053	-1.14225	down
pme0193	C5H10N2O3	L-Glutamine	Amino acids and derivatives	Amino acids and derivatives	56-85-9	1	27184000	24799000	17531000	6704200	5760600	5533900	1.28519	0.0259239	0.0954133	0.258922	-1.94941	down
pme0026	C6H14N2O2	L-Lysine	Amino acids and derivatives	Amino acids and derivatives	56-87-1	1	30435000	25742000	19216000	7427200	6273500	6015700	1.28311	0.0275922	0.0968272	0.261515	-1.93503	down
pme1691	C7H16NO2	Acetylcholine	Alkaloids	Alkaloids	60-31-1	2	15974	30227	20693	315020	424620	443720	1.30051	0.0107628	0.0595085	17.6901	4.14487	up
mws1050	C5H9NO4	O-Acetylserine	Amino acids and derivatives	Amino acids and derivatives	5147-00-2	2	107420	236960	227680	357940	424030	432290	1.09464	0.0187413	0.0817113	2.12261	1.08584	up
Zmzn000113	C5H9NO4	L-threo-3-Methylaspartate	Amino acids and derivatives	Amino acids and derivatives	6061-13-8	1	1963000	1822600	1726000	2215500	2140300	2392400	1.19074	0.015583	0.0748458	1.22436	0.292032	insig
pme0014	C5H9NO4	L-Glutamic acid	Amino acids and derivatives	Amino acids and derivatives	56-86-0	1	15684000	18197000	17104000	54584000	58520000	59551000	1.31056	0.000206017	0.0130615	3.38639	1.75975	up
pmp001285	C8H4O3	Phthalic anhydride	Phenolic acids	Phenolic acids	85-44-9	1	1219100	1273000	1120600	985730	831270	906170	1.20681	0.00930636	0.0556626	0.753777	-0.40779	insig
pmb2826	C5H8O5	L-Citramalic acid	Organic acids	Organic acids	1583941	2	498420	263950	340300	279450	226900	132840	0.917719	0.144	0.262344	0.579675	-0.786684	insig
ML10171848	C5H8O5	D-Arabinono-1,4-lactone	Others	Saccharides and Alcohols	322392	2	145890	96861	101590	98605	104390	93432	0.579155	0.414781	0.526789	0.860853	-0.216161	insig
Lmbn000216	C5H8O5	3-Methylmalic acid*	Organic acids	Organic acids	152204-30-3	2	356290	246370	251960	274380	288010	196380	0.435799	0.525131	0.621658	0.887845	-0.17162	insig
Zmyn000247	C5H8O5	2-Hydroxyglutaric Acid*	Organic acids	Organic acids	13095-48-2	2	368840	273960	313520	299850	211430	184440	0.928416	0.125897	0.238027	0.727497	-0.458987	insig
mws2213	C9H8O2	Cinnamic acid	Phenolic acids	Phenolic acids	140-10-3	2	68668	48104	66575	48643	25256	9371.9	0.941574	0.0799872	0.175215	0.454171	-1.13869	insig
mws1024	C9H8O2	p-Coumaraldehyde	Phenolic acids	Phenolic acids	2538-87-6	2	201260	161160	232940	209130	220930	229970	0.610293	0.410724	0.523591	1.10862	0.148769	insig
pme1210	C5H11NO2S	L-Methionine	Amino acids and derivatives	Amino acids and derivatives	63-68-3	1	1672100	1535600	1453400	927830	996150	1038500	1.27687	0.00440207	0.0424977	0.635575	-0.653865	insig
mws0847	C6H7N5	1-Methyladenine	Nucleotides and derivatives	Nucleotides and derivatives	5142-22-3	2	148010	131070	137190	107300	109150	69771	1.05459	0.0626519	0.152915	0.687585	-0.54039	insig
mws0262	C4H6O6	L-Tartaric acid	Organic acids	Organic acids	87-69-4	2	40552	21667	32429	55738	42587	37788	0.873333	0.145587	0.262719	1.4381	0.524161	insig
MWSmce199	C5H10O5	L-Xylose	Others	Saccharides and Alcohols	609-06-3	2	261960	242000	220330	313630	228510	272270	0.623671	0.354766	0.477203	1.12443	0.169188	insig
MWSmce676	C5H10O5	D-Arabinose	Others	Saccharides and Alcohols	28697-53-2	2	248480	201240	205100	287940	257080	244590	0.992232	0.0884236	0.186869	1.20584	0.270042	insig
Zmgn000173	C5H10O5	D-Ribose	Others	Saccharides and Alcohols	50-69-1	2	174340	117220	135640	134190	117900	88294	0.738301	0.253421	0.378163	0.796779	-0.327748	insig
pmf0420	C9H10O2	Benzyl acetate	Organic acids	Organic acids	140-11-4	2	212920	233410	210730	184150	213290	271490	0.0500916	0.894003	0.922122	1.01807	0.0258301	insig
mws0921	C9H10O2	p-Coumaryl alcohol	Phenolic acids	Phenolic acids	653915	2	477570	426310	460520	575690	542940	563740	1.24315	0.00672189	0.0463226	1.23305	0.302228	insig
pme0183	C5H5N5O	Isoguanine	Nucleotides and derivatives	Nucleotides and derivatives	3373-53-3	3	235410	153540	244760	157110	137550	113570	1.01529	0.106275	0.209684	0.644191	-0.634441	insig
pme1109	C5H5N5O	Guanine	Nucleotides and derivatives	Nucleotides and derivatives	73-40-5	1	1659800	1703700	2089000	795880	753740	768500	1.29702	0.015987	0.0756399	0.425148	-1.23396	down
mws4177	C8H9NO2	Methyl Anthranilate	Organic acids	Organic acids	134-20-3	2	8290	7832.5	6716.8	17962	11819	26376	1.15452	0.117375	0.224144	2.45879	1.29795	up
Lmtp003569	C8H9NO2	R-mandelamide	Alkaloids	Alkaloids	24008-62-6	2	301370	478200	647320	46683	69823	80319	1.26662	0.0532258	0.141786	0.13794	-2.85789	down
pme0256	C5H4N4O2	Xanthine	Nucleotides and derivatives	Nucleotides and derivatives	69-89-6	3	739340	674570	615390	239650	155400	243750	1.26783	0.000679031	0.0258303	0.314788	-1.66755	down
mws0182	C8H8O3	p-Hydroxyphenyl acetic acid	Phenolic acids	Phenolic acids	156-38-7	2	58364	76258	44200	25551	24913	20486	1.23362	0.0567622	0.144721	0.396763	-1.33365	down
pme0221	C8H8O3	Methyl salicylate	Phenolic acids	Phenolic acids	119-36-8	2	19890	26069	28622	29412	31801	35670	0.971264	0.0863511	0.184522	1.29903	0.377435	insig
mws0458	C8H8O3	Vanillin	Phenolic acids	Phenolic acids	121-33-5	3	6913200	6065300	6915400	5153700	5400300	5461700	1.19856	0.0341946	0.109472	0.805056	-0.312839	insig
pme2362	C8H8O3	Mandelic acid	Phenolic acids	Phenolic acids	90-64-2	2	79169	136120	114100	50987	21361	23213	1.1871	0.0236255	0.092442	0.290116	-1.7853	down
Zmyn002323	C8H8O3	2-Hydroxyphenylacetic acid	Organic acids	Organic acids	614-75-5	2	682920	468550	812040	37277	30802	36675	1.30518	0.0251144	0.0944025	0.0533504	-4.22836	down
mws0254	C6H9N3O2	L-Histidine	Amino acids and derivatives	Amino acids and derivatives	71-00-1	1	4690500	5587100	3600200	675240	533970	518080	1.30285	0.0189027	0.0817113	0.124464	-3.0062	down
MWSslk051	C8H13NO2	Scopine	Alkaloids	Tropan alkaloids	498-45-3	2	43846	34350	45565	49071	53646	41064	0.704653	0.258446	0.381649	1.16176	0.216316	insig
Zmyn004238	C9H18O2	Nonanoic Acid	Organic acids	Organic acids	112-05-0	2	45600	42207	53044	41181	43162	38354	0.881687	0.190309	0.314209	0.871112	-0.19907	insig
pmf0174	C10H22O	1-Decanol	Others	Saccharides and Alcohols	112-30-1	3	5531600	4816000	4713600	4935100	3952000	4684900	0.693006	0.274698	0.393431	0.901123	-0.150203	insig
pmf0175	C10H22O	2-Decanol	Others	Saccharides and Alcohols	1120-06-5	3	5696000	4877700	4638300	5096000	4096200	4874100	0.511034	0.435425	0.537778	0.924684	-0.112967	insig
Lmbn001467	C7H13NO3	5-Acetamidopentanoic Acid	Organic acids	Organic acids	1072-10-2	2	255490	186470	187350	402030	510260	487740	1.2598	0.00449947	0.04279	2.22471	1.15361	up
Lmbn002072	C7H12O4	2-Propylsuccinic acid*	Organic acids	Organic acids	618-57-5	2	423990	255580	230480	198830	159320	154480	1.04625	0.155174	0.27543	0.563299	-0.828028	insig
Zmjn001813	C7H12O4	Pimelic acid*	Organic acids	Organic acids	111-16-0	2	395720	246340	247470	245940	160340	152760	0.955559	0.145316	0.262719	0.628467	-0.670092	insig
pme0128	C6H12N2O3	L-Alanyl-L-Alanine	Amino acids and derivatives	Amino acids and derivatives	1948-31-8	2	28397	23664	21569	19346	31399	25632	0.10686	0.833726	0.874172	1.03731	0.0528446	insig
mws0005	C10H12N2	Tryptamine	Alkaloids	Plumerane	61-54-1	3	315170	600730	1508500	1019600	1403500	766160	0.536093	0.573504	0.663507	1.31548	0.395594	insig
NK10246260	C9H7NO2	2,4-Dihydroxyquinoline	Alkaloids	Quinoline alkaloids	86-95-3	2	38699	9901.2	19365	44143	28236	42807	0.825486	0.201947	0.326618	1.69478	0.761097	insig
mws1346	C6H11NO4	DL-2-Aminoadipic acid	Alkaloids	Alkaloids	542-32-5	2	142740	181400	193100	1617400	1909500	1892800	1.30953	0.00273965	0.0366959	10.4781	3.38931	up
pme3382	C6H11NO4	N-Acetyl-L-threonine	Amino acids and derivatives	Amino acids and derivatives	17093-74-2	2	61207	78307	78671	103170	112200	137860	1.17977	0.0300516	0.100384	1.61895	0.695056	insig
Lmcp000282	C7H15NO3	L-Carnitine	Alkaloids	Alkaloids	541-15-1	2	95283	156870	96340	5749200	6588200	5515500	1.30925	0.00300636	0.0380393	51.2289	5.67888	up
pme2996	C9H6O3	4-Hydroxycoumarin	Lignans and Coumarins	Coumarins	1076-38-6	2	1626600	1201700	1291700	1164200	1122500	1110400	0.920182	0.201721	0.326618	0.824539	-0.278341	insig
Zmpn003044	C9H6O3	Umbelliferone	Lignans and Coumarins	Coumarins	93-35-6	3	390130	297870	352950	321450	334590	460640	0.31666	0.656902	0.734957	1.07275	0.101315	insig
pme2914	C6H10O5	3-Hydroxy-3-methylpentane-1,5-dioic acid	Organic acids	Organic acids	503-49-1	1	7528200	5449900	5288500	11665000	8628700	8979100	1.12095	0.0416319	0.121973	1.60253	0.680353	insig
MWS0559	C6H10O5	1,6-anhydro-β-D-glucose	Others	Saccharides and Alcohols	498-07-7	2	140070	85197	104520	41268	36591	16744	1.18699	0.0241848	0.0934948	0.286861	-1.80158	down
pmf0440	C10H10O2	4-MethoxycinnaMaldehyde	Phenolic acids	Phenolic acids	1963-36-6	1	145350	168160	183370	194820	173700	240340	0.858124	0.192199	0.316778	1.22537	0.293213	insig
pme2758	C5H9NO5	4-Hydroxy-L-glutamic acid	Amino acids and derivatives	Amino acids and derivatives	3913-68-6	3	49182	37821	25380	15784	34309	15031	0.875735	0.167015	0.290429	0.579483	-0.787163	insig
pme1419	C6H13NO2S	L-Methionine methyl ester	Amino acids and derivatives	Amino acids and derivatives	10332-17-9	2	74027	75067	63097	164670	172970	181830	1.3045	0.000124035	0.0106887	2.44812	1.29168	up
Lmbp000123	C6H13NO2S	L-Homomethionine	Amino acids and derivatives	Amino acids and derivatives	25148-30-5	2	5637700	4827600	4045500	909820	802140	697760	1.3038	0.0116348	0.0621613	0.166064	-2.59019	down
mws0159	C9H8O3	Phenylpyruvic acid	Organic acids	Organic acids	156-06-9	2	143080	80149	90144	95076	94914	98912	0.162327	0.716965	0.779406	0.921911	-0.117301	insig
pme1439	C9H8O3	p-Coumaric acid	Phenolic acids	Phenolic acids	501-98-4	2	729980	720700	822050	749980	666940	607780	0.832176	0.193837	0.317825	0.890867	-0.166718	insig
Lmmn001643	C9H8O3	2-Hydroxycinnamic acid	Organic acids	Organic acids	583-17-5	1	395520	286990	516860	267930	326830	302900	0.775248	0.266084	0.385183	0.748443	-0.418036	insig
MWSmce248	C9H8O3	3-Hydroxycinnamic Acid	Others	Others	14755-02-3	1	1618600	1253900	1627600	1098800	1431300	1315500	0.723194	0.240514	0.366552	0.854559	-0.226748	insig
MWSCX015	C9H8O3	(E)-3-(3,4-dihydroxyphenyl)acrylaldehyde	Others	Others	-	2	1037800	1208600	1389200	1292400	1145400	1155400	0.0593531	0.907987	0.931495	0.988338	-0.0169242	insig
pme2529	C6H12O5	1,5-Anhydro-D-glucitol	Others	Saccharides and Alcohols	154-58-5	2	54641	55411	40730	116140	101250	123670	1.26858	0.00211789	0.0335195	2.26194	1.17756	up
pmf0534	C10H12O2	Hinokitiol	Terpenoids	Monoterpenoids	499-44-5	2	10733	15681	19027	15455	11044	14579	0.28228	0.633288	0.714421	0.903985	-0.145629	insig
pme3083	C8H7NO3	2-(Formylamino)benzoic acid	Phenolic acids	Phenolic acids	3342-77-6	2	1667400	1670900	2088500	1544900	1538500	1461800	0.987083	0.166223	0.290429	0.837547	-0.255758	insig
pme2617	C5H11NO3S	L-Methionine Sulfoxide	Amino acids and derivatives	Amino acids and derivatives	3226-65-1	2	13987000	13451000	13309000	12756000	13510000	12773000	0.870868	0.155254	0.27543	0.958083	-0.0617777	insig
pme0021	C9H11NO2	L-Phenylalanine	Amino acids and derivatives	Amino acids and derivatives	63-91-2	1	14213000	10764000	10877000	5892000	5966700	5292500	1.26831	0.0278787	0.0971158	0.478362	-1.06382	down
pme0282	C8H6O4	Phthalic acid	Organic acids	Organic acids	88-99-3	1	31102	21253	30637	38144	39402	27828	0.768091	0.201665	0.326618	1.26969	0.344475	insig
pme0281	C8H6O4	Terephthalic acid	Phenolic acids	Phenolic acids	100-21-0	2	421100	470850	719520	509280	618120	540780	0.213199	0.861435	0.895328	1.03519	0.0498976	insig
pmc0274	C6H6N4S	6-Methylmercaptopurine	Nucleotides and derivatives	Nucleotides and derivatives	50-66-8	2	12940000	9975100	10218000	5638800	5688400	4606300	1.26178	0.0168795	0.0794674	0.480894	-1.05621	down
mws0344	C5H10O6	D-Xylonic acid	Organic acids	Organic acids	526-91-0	1	3884900	2434400	3173300	3311800	3148400	874320	0.539129	0.477747	0.57657	0.772657	-0.372101	insig
Lmrn003000	C9H10O3	2-Hydroxy-3-phenylpropanoic acid	Organic acids	Organic acids	7326-19-4	2	8943.5	4800.5	5718.8	9	9	9	1.3125	0.0356036	0.111746	0.00138726	-9.49354	down
Lmbn005172	C9H10O3	2,6-Dimethoxybenzaldehyde	Phenolic acids	Phenolic acids	3392-97-0	2	41906	51611	71340	28664	48435	36650	0.85881	0.187105	0.312169	0.689986	-0.535361	insig
mws1686	C9H10O3	Paeonol	Phenolic acids	Phenolic acids	552-41-0	2	9	9	9	119800	117210	93945	1.31499	0.00550804	0.0434224	12257.6	13.5814	up
mws0467	C9H10O3	3-(4-Hydroxyphenyl)-propionic acid	Phenolic acids	Phenolic acids	501-97-3	2	95700	127880	101180	73049	95588	78836	0.993009	0.107993	0.212215	0.762018	-0.392103	insig
mws0851	C8H15NaO2	Sodium Valproate	Others	Others	1069-66-5	3	1698600	1481600	1432400	1266500	1311400	1389600	1.01847	0.103235	0.205666	0.860144	-0.21735	insig
pmn001681	C10H14O2	1-(4-Methoxyphenyl)-1-propanol	Phenolic acids	Phenolic acids	5349-60-0	3	120200	135210	118980	115510	135430	158790	0.51632	0.455639	0.559113	1.09439	0.130132	insig
NK10253223	C8H9NO3	2-Amino-3-methoxybenzoic acid	Phenolic acids	Phenolic acids	3177-80-8	2	282580	341540	406190	202800	213020	217330	1.20388	0.0636404	0.154393	0.614524	-0.702459	insig
Zmjp000624	C8H9NO3	Pyridoxal	Others	Vitamin	66-72-8	3	245340	287410	391510	184110	223080	185010	1.08317	0.115923	0.223165	0.640729	-0.642214	insig
MWStz147	C9H13NO2	Synephrine; 4-[1-Hydroxy-2-(methylamino)ethyl]phenol	Alkaloids	Alkaloids	34520	1	979710	1093500	1346500	68983	56456	55905	1.31264	0.00984674	0.0564111	0.0530291	-4.23707	down
MWSmce175	C9H13NO2	(-)-Synephrine	Alkaloids	Alkaloids	614-35-7	1	751470	735570	1007700	52906	55955	52565	1.31215	0.0126014	0.06513	0.0647065	-3.94994	down
mws2125	C3H5O6P	Phosphoenolpyruvate	Organic acids	Organic acids	138-08-9	2	64662	69596	44707	280680	238310	331520	1.28905	0.00979542	0.0564111	4.75238	2.24865	up
Hmbp001276	C8H8O4	Gallacetophenone	Phenolic acids	Phenolic acids	528-21-2	1	187700	156640	177650	174930	151640	127020	0.750285	0.2513	0.375765	0.868963	-0.202633	insig
mws0028	C8H8O4	Vanillic acid	Phenolic acids	Phenolic acids	121-34-6	2	113750	114950	125770	73141	90502	96084	1.14158	0.02603	0.0954133	0.732719	-0.448668	insig
Zmsp001834	C8H8O4	2,6-Dimethoxy-1,4-benzoquinone	Quinones	Quinones	530-55-2	2	239490	181070	188910	164840	146870	130680	1.08082	0.0733048	0.167579	0.72586	-0.462236	insig
pme2598	C8H8O4	3,4-Dihydroxybenzeneacetic acid	Phenolic acids	Phenolic acids	102-32-9	2	737050	564190	647810	382690	441480	536520	1.07021	0.0436873	0.124765	0.69813	-0.518433	insig
pme1383	C8H11NO3	Pyridoxine	Others	Vitamin	65-23-6	1	298340	220190	277610	178980	134320	141580	1.19613	0.0211968	0.0865158	0.571357	-0.807536	insig
pme0181	C7H11N3O2	3-Methyl-L-Histidine	Amino acids and derivatives	Amino acids and derivatives	368-16-1	2	25353	17630	11200	55161	63876	53291	1.22357	0.00201885	0.033426	3.18048	1.66924	up
pme3186	C3H7O6P	DL-Glyceraldehyde-3-phosphate	Organic acids	Organic acids	591-59-3	2	220320	219870	172210	571160	608680	557480	1.29825	7.18144e-05	0.00951945	2.8369	1.50432	up
Zmzn000078	C3H7O6P	Dihydroxyacetone phosphate	Others	Saccharides and Alcohols	20915	2	57796	45622	35077	110200	133230	106900	1.24773	0.00311994	0.0380393	2.52955	1.33888	up
mws0024	C7H6O5	Gallic acid	Tannins	Tannin	149-91-7	2	1190600	642830	676390	254450	306210	101600	1.14969	0.0609748	0.150273	0.263868	-1.92211	down
Lmbn003524	C9H16O3	9-Oxononanoic acid	Organic acids	Organic acids	2553-17-5	2	10532	4901	4484.6	7549.2	6708.1	12141	0.608921	0.450342	0.554043	1.32538	0.406401	insig
MWSmce584	C8H11NO	Tyramine	Amino acids and derivatives	Amino acids and derivatives	60-19-5	1	4330500	2863500	2639400	1432200	1222800	1062900	1.23329	0.0563934	0.144167	0.378089	-1.4032	down
pme0253	C8H15NO3	N-Acetyl-L-leucine	Amino acids and derivatives	Amino acids and derivatives	1188-21-2	2	45559	32958	19308	36840	42732	31504	0.423852	0.632968	0.714421	1.13546	0.183272	insig
pme3009	C6H6O6	Trans-Citridic acid	Organic acids	Organic acids	4023-65-8	2	1191600	1383200	1211800	1513000	1507400	1480700	1.14836	0.0559202	0.144131	1.18869	0.249375	insig
MWS4471	C6H10N2O4	N-Alpha-Acetyl-L-Asparagine	Amino acids and derivatives	Amino acids and derivatives	4033-40-3	2	34155	54258	25747	58249	61363	66042	1.01218	0.0975708	0.198269	1.62626	0.701559	insig
mws0242	C8H14O4	Suberic Acid	Organic acids	Organic acids	505-48-6	2	105720	81107	83513	77992	52796	72004	0.92539	0.108162	0.212215	0.750137	-0.414774	insig
Lmgn002555	C8H14O4	2-Propylglutaric acid	Organic acids	Organic acids	32806-62-5	2	56687	84191	87484	66435	66294	74167	0.36956	0.544192	0.638676	0.906	-0.142417	insig
mws1401	C7H14N2O3	L-Theanine	Amino acids and derivatives	Amino acids and derivatives	3081-61-6	2	54642	217900	65390	69568	82851	39764	0.526046	0.4563	0.559202	0.568703	-0.814252	insig
Zmyn000155	C7H14N2O3	N-α-Acetyl-L-ornithine	Amino acids and derivatives	Amino acids and derivatives	1572591	2	2250500	3335000	2606100	814350	933130	794270	1.28965	0.0257583	0.0954133	0.310287	-1.68832	down
MWSmce119	C6H14N4O2	L-Arginine	Amino acids and derivatives	Amino acids and derivatives	74-79-3	1	5369400	6714100	5432500	1412900	1379800	1380600	1.31001	0.00952985	0.0561457	0.238256	-2.06941	down
pme2559	C6H9NO5	N-Acetyl-L-Aspartic Acid	Amino acids and derivatives	Amino acids and derivatives	997-55-7	2	437770	291600	335700	96651	126980	116170	1.27112	0.0265728	0.0961799	0.319041	-1.64819	down
pme0008	C6H13N3O3	L-Citrulline	Amino acids and derivatives	Amino acids and derivatives	372-75-8	1	1057800	1468700	912200	587210	566320	527930	1.21976	0.0707352	0.164219	0.488981	-1.03215	down
mws4175	C6H8O6	D-Glucurono-6,3-lactone	Others	Saccharides and Alcohols	32449-92-6	2	18617	16078	40461	45645	62857	48157	1.05184	0.0514862	0.139807	2.08445	1.05967	up
mws0139	C10H8O3	7-Hydroxy-4-methylcoumarin	Lignans and Coumarins	Coumarins	90-33-5	3	42353	73286	67846	56433	70048	59224	0.109587	0.948155	0.962322	1.0121	0.0173505	insig
mws1075	C10H8O3	7-Methoxycoumarin	Lignans and Coumarins	Coumarins	531-59-9	2	2588400	1980600	1908600	2382100	1957400	939120	0.551442	0.466489	0.566578	0.814904	-0.295299	insig
Lmbn001754	C7H12O5	3-Isopropylmalic Acid*	Organic acids	Organic acids	921-28-8	1	634920	213530	281630	194880	151010	147980	0.952036	0.244864	0.370805	0.437022	-1.19422	insig
pmb3101	C7H12O5	2-Isopropylmalic Acid	Organic acids	Organic acids	49601-06-1	1	626460	196400	268970	175950	139730	173370	0.900646	0.26925	0.389144	0.447918	-1.15869	insig
Zmgn001448	C7H12O5	2-Propylmalic Acid*	Organic acids	Organic acids	-	1	675840	240720	287900	191040	147490	173720	0.982268	0.235426	0.362282	0.425294	-1.23347	insig
mws1500	C11H12O2	Ethyl cinnamate	Phenolic acids	Phenolic acids	103-36-6	2	13117	21978	23113	11559	23725	14609	0.393986	0.597495	0.687083	0.85715	-0.22238	insig
pmb0774	C10H12N2O	N-Hydroxytryptamine*	Alkaloids	Phenolamine	-	3	3954000	4343700	5832800	5924700	5655200	4572300	0.571653	0.398858	0.514619	1.14307	0.192918	insig
pme2024	C10H12N2O	Serotonin*	Alkaloids	Plumerane	50-67-9	3	4489700	5692600	6813800	7607700	6870200	5418800	0.582875	0.357028	0.478891	1.17066	0.227325	insig
mws1074	C9H6O4	Daphnetin	Lignans and Coumarins	Coumarins	486-35-1	2	69605	93488	101260	226990	290990	303350	1.27388	0.00820716	0.0516888	3.10694	1.6355	up
Lmgn000242	C6H10O6	4,5,6-Trihydroxy-2-oxohexanoic acid	Organic acids	Organic acids	56742-44-0	2	9327.5	16187	9139.3	17375	20911	26623	1.0832	0.0482129	0.132516	1.87307	0.905405	insig
pme1021	C6H10O6	D-Glucono-1,5-lactone	Others	Saccharides and Alcohols	90-80-2	2	74455	32455	26643	25929	18369	25762	0.824478	0.294003	0.415183	0.524586	-0.930749	insig
mws1195	C10H10O3	p-Coumaric acid methyl ester*	Phenolic acids	Phenolic acids	3943-97-3	3	112270	110630	114800	681690	705640	871320	1.31285	0.00853748	0.0527217	6.68833	2.74165	up
pmb2795	C10H10O3	4-Methoxycinnamic acid*	Phenolic acids	Phenolic acids	830-09-1	3	67465	70588	81554	459170	488150	581400	1.3108	0.00649479	0.0457522	6.96116	2.79933	up
mws0009	C10H10O3	Coniferaldehyde	Phenolic acids	Phenolic acids	20649-42-7	2	111120	82205	91182	82455	101810	92638	0.124274	0.818021	0.866301	0.973273	-0.0390835	insig
pme3255	C11H14O2	Methyleugenol	Phenolic acids	Phenolic acids	93-15-2	2	42798	12892	42779	274440	257950	55564	1.03558	0.143705	0.26231	5.97096	2.57796	up
mws0981	C6H5N5O2	Isoxanthopterin	Nucleotides and derivatives	Nucleotides and derivatives	529-69-1	3	17356	21871	21228	9018.5	11415	12423	1.22364	0.00796736	0.0514764	0.543487	-0.879683	insig
pmb0786	C6H13NO5	D-Glucosamine	Others	Saccharides and Alcohols	3416-24-8	1	1683900	1647000	2001500	1865500	1802300	1802900	0.295011	0.723843	0.784025	1.02594	0.0369404	insig
mws2212	C9H8O4	Caffeic acid	Phenolic acids	Phenolic acids	331-39-5	1	348240	480170	486680	396890	286470	316880	0.908335	0.139973	0.258475	0.760587	-0.394815	insig
mws1164	C6H12O6	D-Fructose*	Others	Saccharides and Alcohols	7660-25-5	1	4603700	3274600	2685300	2281800	1680400	1397900	1.11374	0.0744753	0.167671	0.507412	-0.97877	insig
mws4170	C6H12O6	D-Glucose*	Others	Saccharides and Alcohols	14431-43-7	1	5594500	3064300	3072200	2201500	1843200	1783600	1.10409	0.141439	0.259668	0.496829	-1.00918	down
pme0516	C6H12O6	Inositol	Others	Saccharides and Alcohols	87-89-8	1	1389800	1317100	1493300	4183400	4590200	4467600	1.31188	0.000355848	0.0199066	3.15252	1.6565	up
MWSmce576	C6H12O6	L-Glucose	Others	Saccharides and Alcohols	921-60-8	1	3838400	3129800	2449000	1710200	1520800	1582800	1.21372	0.0594726	0.149625	0.511171	-0.968122	insig
pmf0139	C6H12O6	D-Galactose*	Others	Saccharides and Alcohols	59-23-4	2	4438100	2609400	2438800	1759100	1378400	1248300	1.13638	0.110152	0.214659	0.46233	-1.11301	down
pmf0138	C6H12O6	D-Mannose*	Others	Saccharides and Alcohols	3458-28-4	2	4479000	3166600	2573900	1178600	1308100	970040	1.24268	0.0531994	0.141786	0.338249	-1.56384	down
mws0093	C10H12O3	Coniferyl alcohol	Phenolic acids	Phenolic acids	458-35-5	3	521530	452800	514520	246580	267470	244590	1.29855	0.00423996	0.0415691	0.509548	-0.972711	insig
Cmyp007180	C11H16O2	Dihydroactinidiolide	Others	Others	17092-92-1	2	14285	8494.2	11899	248570	228530	267430	1.31051	0.00185634	0.033426	21.4697	4.42423	up
Zmsp000878	C9H11NO3	4-hydroxy-5-(2-oxo-l-pyrrolidinyl)-benzoic acid	Alkaloids	Alkaloids	-	1	9339400	7465200	6417300	4986500	4430700	4828800	1.18053	0.0678961	0.16062	0.613473	-0.704929	insig
mws0250	C9H11NO3	L-Tyrosine	Amino acids and derivatives	Amino acids and derivatives	60-18-4	1	36505000	31680000	25503000	20571000	20368000	19950000	1.17379	0.0748777	0.167671	0.649912	-0.621683	insig
mws1350	C9H10O4	Syringaldehyde; 4-Hydroxy-3,5-Dimethoxybenzaldehyde	Phenolic acids	Phenolic acids	134-96-3	3	455050	525910	643830	469910	545090	382070	0.62956	0.355272	0.477209	0.859847	-0.217849	insig
mws0117	C9H10O4	Homovanillic acid; 4-Hydroxy-3-methoxyphenylacetic acid	Phenolic acids	Phenolic acids	306-08-1	1	54497	101690	100570	9	9	9	1.31488	0.0314589	0.10352	0.000105158	-13.2152	down
Lmjp004702	C9H10O4	2',4'-Dihydroxy-6'-methoxyacetophenone	Phenolic acids	Phenolic acids	3602-54-8	3	1163400	466380	1100300	12214000	13199000	4738300	1.23067	0.0748309	0.167671	11.0441	3.46521	up
mws0214	C6H14O6	D-Sorbitol	Others	Saccharides and Alcohols	50-70-4	1	64508	89550	88892	146210	165280	84519	0.906899	0.161828	0.283945	1.63	0.704874	insig
mws1155	C6H14O6	D-Mannitol*	Others	Saccharides and Alcohols	69-65-8	2	23384	18103	29174	46427	67652	16309	0.600839	0.311896	0.43428	1.84526	0.883825	insig
pme2237	C6H14O6	Dulcitol*	Others	Saccharides and Alcohols	608-66-2	1	78788	62767	92443	148170	186700	85412	0.947572	0.162168	0.284019	1.79609	0.844861	insig
pme2596	C8H9NO4	4-Pyridoxic acid	Others	Vitamin	82-82-6	3	54495	57988	64079	37462	26882	36611	1.21533	0.00512003	0.0432191	0.571782	-0.806463	insig
MA10002917	C6H4N2O5	2,4-Dinitrophenol	Phenolic acids	Phenolic acids	51-28-5	2	33305	32398	52755	35954	47473	40757	0.24088	0.814194	0.864173	1.04834	0.0681037	insig
Zmgn000447	C3H7O7P	3-Phospho-D-glyceric acid	Others	Saccharides and Alcohols	820-11-1	2	251860	419740	387550	288170	431030	367750	0.110355	0.895406	0.922569	1.02625	0.0373787	insig
pme3553	C11H6O3	Psoralen	Lignans and Coumarins	Coumarins	66-97-7	2	682390	712230	929700	671860	764960	686430	0.489424	0.488667	0.585292	0.913493	-0.130534	insig
mws1668	C11H6O3	Angelicin	Lignans and Coumarins	Coumarins	523-50-2	2	582170	692720	671480	548030	723440	639450	0.154748	0.856981	0.892649	0.981787	-0.0265186	insig
mws0752	C11H22O2	Undecylic Acid	Lipids	Free fatty acids	112-37-8	3	606560	602370	589120	576120	484600	521540	1.03822	0.108615	0.212367	0.879987	-0.184446	insig
Hmgp002327	C11H9O2N	3-amino-2-naphthoic acid	Alkaloids	Phenolamine	-	1	18541000	13411000	15301000	18368000	17588000	10940000	0.0948932	0.968398	0.978689	0.992445	-0.0109411	insig
pmn001492	C11H8O3	Ayapin	Lignans and Coumarins	Coumarins	494-56-4	2	135260	122030	108900	94828	92325	89823	1.18867	0.0551301	0.143248	0.756372	-0.402831	insig
pme0137	C7H12N2O4	N-Acetyl-L-Glutamine	Amino acids and derivatives	Amino acids and derivatives	2490-97-3	2	206120	244300	311940	325920	352230	367080	1.04362	0.0778714	0.172223	1.37105	0.455276	insig
mws0237	C9H16O4	Azelaic acid	Organic acids	Organic acids	123-99-9	2	2264300	1972900	1759900	1607500	1677500	1698300	1.00262	0.142671	0.261426	0.830952	-0.267164	insig
mws5041	C8H16N2O3	L-Glycyl-L-isoleucine*	Amino acids and derivatives	Amino acids and derivatives	19461-38-2	2	620330	489980	500520	313910	378950	320000	1.21117	0.0247264	0.0944025	0.628781	-0.669369	insig
mws0736	C8H16N2O3	N-Glycyl-L-leucine*	Amino acids and derivatives	Amino acids and derivatives	869-19-2	2	831760	661350	782860	435310	438860	459490	1.26644	0.0230182	0.0908376	0.585974	-0.771091	insig
pme0122	C8H16N2O3	N6-Acetyl-L-lysine	Amino acids and derivatives	Amino acids and derivatives	692-04-6	2	305670	190360	172490	219990	175220	205430	0.254696	0.649027	0.727859	0.898462	-0.15447	insig
Zmdp000292	C7H16N4O2	Arginine methyl ester	Amino acids and derivatives	Amino acids and derivatives	-	2	3877900	4553800	4261200	497170	424400	349750	1.31173	0.00179652	0.033426	0.10016	-3.31962	down
Zmjp000182	C7H16N4O2	N-Monomethyl-L-arginine	Amino acids and derivatives	Amino acids and derivatives	17035-90-4	1	4091100	4301600	4016600	573870	482310	488270	1.31412	0.000152292	0.0111407	0.124459	-3.00626	down
pme3388	C7H16N4O2	Homoarginine	Amino acids and derivatives	Amino acids and derivatives	156-86-5	3	797150	717110	767520	133830	98809	78424	1.30202	5.22871e-05	0.00951945	0.136325	-2.87488	down
pmf0348	C10H20O3	2,6-Dimethyl-7-octene-2,3,6-triol	Others	Saccharides and Alcohols	73815-21-1	2	191900	202880	161590	162710	161500	135810	0.959509	0.108751	0.212367	0.826824	-0.274348	insig
Zmtn001624	C10H7NO3	N-Acetylisatin	Alkaloids	Plumerane	574-17-4	3	34496	24685	31183	69109	104230	58419	1.20622	0.0707987	0.164219	2.56472	1.3588	up
pme0075	C7H11NO5	N-Acetyl-L-glutamic acid	Amino acids and derivatives	Amino acids and derivatives	1188-37-0	2	607050	602850	494230	240590	208780	244850	1.29101	0.00740723	0.0489186	0.407375	-1.29557	down
pme2244	C11H11NO2	3-Indolepropionic acid	Alkaloids	Plumerane	830-96-6	2	28324	23895	31622	263260	316510	369920	1.31017	0.010875	0.0597813	11.3273	3.50173	up
Lmlp002994	C11H11NO2	5-Hydroxyquinoline	Alkaloids	Alkaloids	578-67-6	3	9472.4	14657	10203	3063.5	7119.8	2644.9	1.12065	0.0300836	0.100384	0.373647	-1.42025	down
pme0278	C7H14N2O4	2,6-Diaminooimelic acid	Amino acids and derivatives	Amino acids and derivatives	583-93-7	2	599050	558670	639050	312430	415390	336490	1.24058	0.00421617	0.0415691	0.592346	-0.755487	insig
pmb2561	C7H13NO3S	N-Acetyl-L-methionine	Amino acids and derivatives	Amino acids and derivatives	65-82-7	2	339180	461620	503990	130490	150850	106640	1.27914	0.0197555	0.0831304	0.297351	-1.74976	down
mws0281	C6H8O7	Citric Acid	Organic acids	Organic acids	77-92-9	1	20783000	16757000	22230000	15140000	15716000	14768000	1.09432	0.0985095	0.199223	0.763326	-0.389629	insig
Zmyn000453	C6H8O7	Isocitric Acid	Organic acids	Organic acids	320-77-4	1	32186000	33964000	33070000	26931000	28343000	27927000	1.27873	0.00151742	0.0330542	0.838551	-0.25403	insig
MWSCX014	C10H8O4	Scopoletin (7-Hydroxy-5-methoxycoumarin)	Lignans and Coumarins	Coumarins	92-61-5	2	3149800	4360500	4930500	15346000	15831000	8425200	1.19812	0.057266	0.145227	3.18325	1.6705	up
Hmcp002123	C10H8O4	Isoscopoletin (6-Hydroxy-7-Methoxycoumarin)	Lignans and Coumarins	Coumarins	776-86-3	3	2841200	4531000	4974200	12791000	12941000	7208200	1.14937	0.0553681	0.143474	2.668	1.41576	up
Lmmp002080	C11H16N2O	N-(4-Aminobutyl)benzamide	Alkaloids	Phenolamine	5692-23-9	2	8967700	9882600	9566400	10363000	9207900	7367400	0.401003	0.635615	0.716197	0.947974	-0.0770802	insig
pme2743	C10H11NO3	N-Phenylacetylglycine	Amino acids and derivatives	Amino acids and derivatives	500-98-1	2	304000	228020	167450	87276	80210	33762	1.16463	0.0367968	0.114734	0.287715	-1.79729	down
mws1189	C6H10O7	D-Galacturonic acid*	Organic acids	Organic acids	685-73-4	2	154170	197850	159160	332820	343830	303680	1.26677	0.00111713	0.0316052	1.91778	0.939436	insig
pme3705	C6H10O7	D-Glucoronic acid*	Others	Saccharides and Alcohols	1700908	1	218590	248970	221150	474660	506800	508180	1.30526	5.89227e-05	0.00951945	2.16294	1.113	up
Lmdn003756	C10H10O4	Methyl caffeate	Phenolic acids	Phenolic acids	3843-74-1	3	29575	72713	177080	95056	51048	39233	0.274812	0.559152	0.651718	0.663415	-0.592016	insig
pme0422	C10H10O4	Isoferulic Acid*	Phenolic acids	Phenolic acids	537-73-5	3	699250	626480	715160	370510	386620	435620	1.27542	0.00165786	0.033426	0.584426	-0.774907	insig
MWSslk097	C10H10O4	Dimethyl phthalate	Others	Others	131-11-3	3	22876	15493	20931	20098	15957	19141	0.281311	0.625683	0.710901	0.930793	-0.103468	insig
mws0014	C10H10O4	Ferulic acid*	Phenolic acids	Phenolic acids	537-98-4	1	657370	707660	789210	422300	411580	407300	1.29318	0.0145963	0.0718774	0.576157	-0.795467	insig
mws2104	C7H14O6	D-Pinitol	Others	Saccharides and Alcohols	10284-63-6	1	21611	22313	25269	92527	92753	112300	1.30901	0.00612565	0.0455117	4.30072	2.10458	up
MWS1771	C10H13NO3	L-Tyrosine methyl ester	Amino acids and derivatives	Amino acids and derivatives	1080-06-4	2	174100	187180	178610	285100	331930	314920	1.2942	0.0071896	0.0481501	1.72618	0.787587	insig
pme0534	C6H12O7	Gluconic acid	Others	Saccharides and Alcohols	526-95-4	1	789270	655170	749210	1941000	1896500	1791500	1.3055	4.69948e-05	0.00951945	2.56604	1.35955	up
pme3827	C9H11NO4	3,4-Dihydroxy-L-phenylalanine (L-Dopa)	Amino acids and derivatives	Amino acids and derivatives	59-92-7	3	48537	55010	28221	137210	133550	134360	1.24101	0.00691263	0.0469565	3.07449	1.62035	up
mws0027	C9H10O5	Syringic acid	Phenolic acids	Phenolic acids	530-57-4	2	20929	53380	43006	45090	32575	23678	0.230234	0.66877	0.744731	0.863854	-0.211141	insig
pmp000513	C12H9NO2	Dictamnine	Alkaloids	Quinoline alkaloids	484-29-7	3	2258700	2294400	2317200	2676100	2528200	2421100	1.12817	0.0697628	0.16341	1.10991	0.15044	insig
Zmzn000079	C4H9O7P	D-Erythrose-4-phosphate	Others	Saccharides and Alcohols	585-18-2	2	137750	94342	67080	186390	169870	167780	1.08386	0.0583173	0.147108	1.75163	0.808702	insig
pmb2640	C12H24O2	Dodecanoic acid (Lauric acid)	Lipids	Free fatty acids	143-07-7	1	202360	199920	203610	167540	166940	155660	1.28604	0.00649376	0.0457522	0.808959	-0.305862	insig
mws1070	C11H6O4	Xanthotoxol	Lignans and Coumarins	Coumarins	2009-24-7	3	163380	274620	307800	229800	278190	320200	0.375159	0.624032	0.709873	1.11047	0.151173	insig
mws5037	C9H18N2O3	L-Alanyl-L-leucine	Amino acids and derivatives	Amino acids and derivatives	3303-34-2	2	317180	356760	375170	1003400	1023700	1003200	1.30829	0.000134873	0.0106887	2.88845	1.53029	up
NK10251888	C8H18N4O2	NG,NG-Dimethyl-L-arginine	Amino acids and derivatives	Amino acids and derivatives	30315-93-6	2	1480100	1440600	1557000	632580	433160	360970	1.26977	0.00229772	0.0342332	0.318626	-1.65007	down
mws0018	C10H26N4	Spermine	Alkaloids	Phenolamine	71-44-3	1	6346800	6732300	6119700	6809500	7235700	5816200	0.257673	0.665308	0.742615	1.03451	0.0489512	insig
Wmhn001652	C11H8O4	3-Methoxy-juglone	Quinones	Quinones	-	2	9250100	6880900	7691400	9774300	8424500	5774100	0.046112	0.972831	0.980044	1.00632	0.00908568	insig
mws0282	C11H12N2O2	L-Tryptophan	Amino acids and derivatives	Amino acids and derivatives	73-22-3	1	12226000	9240800	9649000	12608000	11511000	7317400	0.0414434	0.957653	0.969892	1.0103	0.0147887	insig
MWSmce056	C11H12N2O2	DL-Tryptophan	Amino acids and derivatives	Amino acids and derivatives	20064	1	56174000	44971000	48009000	57194000	51537000	37341000	0.157475	0.888823	0.917775	0.979337	-0.030123	insig
Zmtn001464	C10H7NO4	4,8-Dihydroxyquinoline-2-carboxylic acid	Organic acids	Organic acids	59-00-7	3	47780	60309	64115	416940	451690	393360	1.30728	0.00107439	0.0316052	7.32846	2.87351	up
MWStz152	C11H11NO3	2-(Acetylamino)-3-phenyl-2-propenoic acid	Alkaloids	Alkaloids	5469-45-4	2	214760	231040	266140	296000	262600	240240	0.709616	0.262033	0.383965	1.12206	0.166151	insig
pmb0818	C11H11NO3	Methoxyindoleacetic acid	Alkaloids	Plumerane	3471-31-6	3	578330	433410	465980	554100	524870	370760	0.122287	0.903321	0.927708	0.981059	-0.0275887	insig
pme1261	C9H19NO4	D-Panthenol	Others	Saccharides and Alcohols	81-13-0	2	11311	10186	60096	4836	13246	6481.2	0.774802	0.367166	0.487674	0.301045	-1.73195	insig
mws1076	C11H10O4	Scoparone	Lignans and Coumarins	Coumarins	120-08-1	3	3226500	4510100	5549200	39094000	41549000	21377000	1.26653	0.0418359	0.121973	7.67888	2.94089	up
pma6599	C11H10O4	6-Hydroxymethylherniarin	Lignans and Coumarins	Coumarins	117597-79-2	2	17217	17621	28338	30102	17035	29299	0.466893	0.473547	0.572955	1.20989	0.274876	insig
mws4173	C11H10O4	5,7-Dimethoxycoumarin (Limettin)(Citropten)	Lignans and Coumarins	Coumarins	487-06-9	3	108910	97296	82956	47063	40293	37190	1.27721	0.0101641	0.0568591	0.430714	-1.2152	down
Lmln010063	C14H22O	2,6-Di-tert-butylphenol*	Phenolic acids	Phenolic acids	128-39-2	2	103860	96647	95667	76542	81229	92443	1.05405	0.0627095	0.152915	0.844821	-0.243282	insig
Lmbn013410	C14H22O	2,4-Di-Tert-Butylphenol*	Phenolic acids	Phenolic acids	96-76-4	1	100910	103720	105400	84086	78567	83054	1.28793	0.000757332	0.0266749	0.792527	-0.335469	insig
MWS1961	C13H22N2	N,N'-dicyclohexylcarbodiimide	Alkaloids	Alkaloids	538-75-0	3	103090	89667	93333	85444	80424	90738	0.913501	0.126159	0.23805	0.896942	-0.156914	insig
Zmgn002106	C11H13NO3	N-Acetyl-L-phenylalanine	Amino acids and derivatives	Amino acids and derivatives	2018-61-3	1	7120000	7459300	7369300	6701300	6270100	6038500	1.20302	0.0206161	0.0852432	0.86611	-0.207378	insig
Lmbp002962	C10H8O5	Isofraxetin	Lignans and Coumarins	Coumarins	50656-75-2	3	85653	77698	125090	189000	76963	83342	0.241287	0.644833	0.72401	1.21101	0.276211	insig
pmb2620	C11H12O4	3,4-Dimethoxycinnamic acid	Phenolic acids	Phenolic acids	14737-89-4	1	11853	9222.6	12931	25067	23922	22501	1.26663	0.00130847	0.0327463	2.10224	1.07193	up
pme3443	C11H12O4	Sinapinaldehyde	Phenolic acids	Phenolic acids	4206-58-0	3	615060	878820	944500	459550	482390	457870	1.18536	0.0742693	0.167671	0.574074	-0.800692	insig
mws1212	C11H12O4	Methyl ferulate	Phenolic acids	Phenolic acids	149567	3	215500	261500	321710	254610	266440	196880	0.445445	0.516971	0.614781	0.898862	-0.153829	insig
Zmpn000199	C6H10O8	D-Galactaric acid*	Others	Saccharides and Alcohols	526-99-8	2	668450	1231300	1117000	1529600	1440000	1820500	1.01038	0.0539223	0.141855	1.58783	0.667061	insig
Zmyn000108	C6H10O8	D-Saccharic acid*	Others	Saccharides and Alcohols	87-73-0	1	253290	97150	66012	351780	335700	278340	1.02849	0.0723269	0.166142	2.31916	1.2136	up
Hmcn000192	C7H14O7	Sedoheptulose	Others	Saccharides and Alcohols	3019-74-7	1	313600	475790	482810	672840	645980	722030	1.12656	0.0300036	0.100384	1.60419	0.681845	insig
mws0853	C11H14O4	Sinapyl alcohol	Phenolic acids	Phenolic acids	537-33-7	1	220730	295740	355430	256780	197870	179380	0.889071	0.171563	0.296648	0.727182	-0.459612	insig
pme0109	C10H13NO4	Methyldopa	Amino acids and derivatives	Amino acids and derivatives	555-30-6	3	32330	25758	33704	9	9	9	1.31504	0.00636435	0.0457522	0.000294143	-11.7312	down
pme3437	C10H12O5	Eudesmic acid (3,4,5-trimethoxybenzoic acid)	Phenolic acids	Phenolic acids	118-41-2	3	38388	42055	27588	52749	30748	7943.5	0.462032	0.718032	0.779507	0.846428	-0.24054	insig
pmb2507	C5H11O7P	2-Deoxyribose-1-phosphate	Nucleotides and derivatives	Nucleotides and derivatives	17210-42-3	2	176280	130370	84935	1808700	1815300	3856000	1.28842	0.0738191	0.167671	19.1019	4.25564	up
mws0863	C5H11O7P	2-Deoxyribose-5'-phosphate	Nucleotides and derivatives	Nucleotides and derivatives	102916-66-5	2	50967	50849	40596	118320	87408	101150	1.25975	0.0158014	0.0751355	2.15486	1.10759	up
pme0170	C8H16N4O3	N-Acetyl-L-Arginine	Amino acids and derivatives	Amino acids and derivatives	155-84-0	3	74267	105750	127360	38877	30264	38021	1.24746	0.0456225	0.128745	0.348634	-1.52022	down
MWS1900	C11H20O4	Undecanedioic acid	Lipids	Free fatty acids	1852-04-6	3	60922	54239	48781	228990	240780	287320	1.30851	0.0063667	0.0457522	4.61804	2.20728	up
mws5045	C12H24O3	12-Hydroxydodecanoic acid	Lipids	Free fatty acids	505-95-3	1	4688800	5015200	5259000	5859300	5073900	4926900	0.519672	0.432284	0.534593	1.05995	0.0840024	insig
pme2566	C8H14N2O5	5-L-Glutamyl-L-amino acid	Amino acids and derivatives	Amino acids and derivatives	5875-41-2	3	35599	48364	48695	39590	43721	82378	0.448401	0.509798	0.607541	1.24899	0.320766	insig
mws0677	C12H14N2O2	N-Acetyl-5-hydroxytryptamine	Alkaloids	Alkaloids	1210-83-9	1	126850	119620	117120	279750	321960	182580	1.18574	0.0760346	0.169739	2.15707	1.10907	up
mws1337	C9H17NO5	D-Pantothenic Acid	Others	Vitamin	79-83-4	1	6872200	5338100	5837900	6928300	4927700	6740500	0.133789	0.827794	0.871585	1.03038	0.0431762	insig
mws2608	C8H15NO6	N-Acetyl-D-galactosamine	Others	Saccharides and Alcohols	1811-31-0	2	202440	161640	150290	133910	164070	164560	0.527753	0.418517	0.526789	0.899236	-0.153228	insig
pmp000284	C11H10O5	Fraxidin (8-Hydroxy-6,7-dimethoxycoumarin)*	Lignans and Coumarins	Coumarins	525-21-3	3	314490	838770	754780	8704500	7225100	3696800	1.23552	0.0562277	0.144131	10.2862	3.36263	up
mws1639	C11H10O5	Isofraxidin*	Lignans and Coumarins	Coumarins	486-21-5	3	800990	2170900	2139500	21571000	17523000	9600100	1.23053	0.0517476	0.139807	9.52659	3.25196	up
mws5042	C11H14N2O3	L-Glycyl-L-phenylalanine	Amino acids and derivatives	Amino acids and derivatives	721-66-4	2	893030	727820	825200	610780	681520	679190	1.09175	0.0619555	0.152247	0.805989	-0.311168	insig
MWS4296	C11H14N2O3	Glycylphenylalanine	Amino acids and derivatives	Amino acids and derivatives	519077	2	197140	179650	225540	165900	228240	214720	0.0415821	0.930176	0.949214	1.01084	0.0155564	insig
Hmlp013407	C15H26O	β-Eudesmol	Terpenoids	Sesquiterpenoids	473-15-4	2	1015600	943800	925030	930720	886930	933240	0.749842	0.249116	0.374264	0.953703	-0.0683878	insig
Hmcp003852	C15H26O	Elemol	Terpenoids	Sesquiterpenoids	639-99-6	3	6094700	7415200	7122300	7424500	8811300	9642100	0.996399	0.0962408	0.197034	1.25425	0.326823	insig
mws0520	C11H13NO4	N-Acetyl-L-tyrosine	Amino acids and derivatives	Amino acids and derivatives	537-55-3	3	114110	115670	100890	75822	33351	39247	1.13778	0.0331728	0.107304	0.448846	-1.15571	down
Zmln002252	C10H8O6	Sideretin (5,7,8-Trihydroxy-6-methoxycoumarin)	Lignans and Coumarins	Coumarins	-	3	183610	338170	364700	119740	129760	99602	1.1784	0.0832344	0.180721	0.393807	-1.34444	down
mws4085	C11H12O5	Sinapic acid	Phenolic acids	Phenolic acids	530-59-6	1	205360	352710	407720	154960	146890	123490	1.15754	0.0930699	0.193252	0.440406	-1.18309	down
pme0220	C13H20O3	Methyl jasmonate	Organic acids	Organic acids	1211-29-6	3	38743	6491.6	9629.5	97645	61997	35861	1.02045	0.102611	0.205006	3.5634	1.83326	up
pme1194	C9H13N3O4	2'-Deoxycytidine	Nucleotides and derivatives	Nucleotides and derivatives	951-77-9	2	324430	252470	328500	192390	182940	215780	1.18347	0.0372912	0.115895	0.652872	-0.615129	insig
mws0119	C14H28O2	Myristic Acid	Lipids	Free fatty acids	544-63-8	1	16199000	14240000	12648000	9875900	8965300	9586400	1.22798	0.0344188	0.109472	0.659772	-0.59996	insig
pma6455	C5H11O8P	Ribulose-5-phosphate	Others	Saccharides and Alcohols	4300-28-1	2	305930	329180	144550	406170	414910	308450	0.791601	0.175061	0.300438	1.44875	0.534806	insig
pmb0490	C13H18N2O2	p-Coumaroylputrescine	Alkaloids	Phenolamine	34136-53-3	1	106460	171560	138060	109990	87920	55958	0.974622	0.0939209	0.194594	0.610142	-0.712782	insig
ML10174588	C15H22O2	Confertifoline	Terpenoids	Sesquiterpenoids	1811-23-0	2	626780	525730	486140	536460	456270	523910	0.485092	0.460633	0.561757	0.925542	-0.111629	insig
Hmlp006964	C12H12O5	5,6,7-Trimethoxycoumarin	Lignans and Coumarins	Coumarins	55085-47-7	3	1894400	4729800	4237400	39424000	24274000	19124000	1.23483	0.0561799	0.144131	7.62521	2.93078	up
mws4176	C12H16N2O3	L-Alanyl-L-Phenylalanine	Amino acids and derivatives	Amino acids and derivatives	3061-90-3	2	181610	159520	185540	123140	155660	151400	0.991441	0.0723108	0.166142	0.81683	-0.291892	insig
Lmhn003240	C11H10O6	Benzoylmalic acid	Phenolic acids	Phenolic acids	22138-51-8	1	158500	136190	169970	258430	269230	280010	1.27959	0.00138785	0.032996	1.7382	0.79759	insig
pmn001669	C12H14O5	Methyl sinapate	Phenolic acids	Phenolic acids	20733-94-2	1	10035	13301	13097	3249.6	3663.1	2893.8	1.2999	0.0111979	0.0605963	0.269165	-1.89344	down
pme0428	C12H14O5	3,4,5-Trimethoxycinnamic acid	Phenolic acids	Phenolic acids	90-50-6	2	31888	44488	36841	91297	70019	50722	1.09367	0.0956358	0.196435	1.87285	0.905232	insig
Lmzn001925	C12H16O5	3,4'-Dihydroxy-3'-methoxybenzenepentanoic acid	Phenolic acids	Phenolic acids	-	2	83994	43618	57858	45821	48067	42558	0.747728	0.300258	0.421158	0.735677	-0.442856	insig
MWS0552	C15H28O2	Cis-10-Pentadecenoic Acid(C15: 1)	Lipids	Free fatty acids	84743-29-3	2	50410	65454	68515	49612	87980	60313	0.162436	0.747281	0.804717	1.07336	0.102134	insig
pme2827	C16H32O	Palmitaldehyde	Lipids	Free fatty acids	629-80-1	3	36899000	37642000	36480000	38418000	39326000	44408000	0.953185	0.181295	0.307522	1.10026	0.137845	insig
pmp001101	C15H15NO2	N-Methylflindersine	Alkaloids	Alkaloids	50333-13-6	3	100120	127460	149210	47214	52197	50830	1.27456	0.032402	0.105529	0.398739	-1.32648	down
mws1383	C12H10N4O2	Lumichrome	Alkaloids	Alkaloids	1086-80-2	3	50922	41251	19147	17393	17250	16707	0.994496	0.167355	0.290429	0.461283	-1.11628	insig
pme0264	C10H14N2O5	Thymidine	Nucleotides and derivatives	Nucleotides and derivatives	50-89-5	2	656640	356730	476840	279860	222890	202120	1.14874	0.0865369	0.184522	0.473	-1.08009	down
MWSslk062	C15H14O3	4'-Methoxyresveratrol	Phenolic acids	Phenolic acids	33626-08-3	3	1453000	1540900	1878700	293130	230550	271480	1.30723	0.00801105	0.0514764	0.16319	-2.61537	down
MWS2430	C15H30O2	13-methylmyristic acid	Lipids	Free fatty acids	2485-71-4	1	628410	589870	518970	326900	351290	269570	1.2566	0.00359619	0.0413942	0.545552	-0.874212	insig
mws0359	C15H30O2	Pentadecanoic Acid	Lipids	Free fatty acids	1002-84-2	1	347930	373330	316170	236220	297980	241810	1.13144	0.0289428	0.0990094	0.748012	-0.418867	insig
ML10180524	C9H13N3O5	Cytarabine	Nucleotides and derivatives	Nucleotides and derivatives	147-94-4	1	1426400	1114700	1449000	518060	533270	532610	1.29109	0.0174412	0.0802134	0.396967	-1.33291	down
pme3732	C9H13N3O5	Cytidine	Nucleotides and derivatives	Nucleotides and derivatives	65-46-3	2	828610	696980	886140	575500	831520	587520	0.768884	0.247996	0.373171	0.827016	-0.274012	insig
MWSmce295	C9H12N2O6	1-beta-D-Arabinofuranosyluracil	Nucleotides and derivatives	Nucleotides and derivatives	3083-77-0	2	197940	168200	227630	188220	278060	283680	0.766916	0.233884	0.361077	1.26305	0.336909	insig
mws0248	C9H12N2O6	Uridine	Nucleotides and derivatives	Nucleotides and derivatives	58-96-8	1	1581000	1550400	1519600	649670	821970	1065000	1.18804	0.0259015	0.0954133	0.545397	-0.874622	insig
mws0976	C9H12N2O6	β-Pseudouridine	Nucleotides and derivatives	Nucleotides and derivatives	1445-07-4	3	243740	253850	205860	146180	157680	139190	1.25456	0.0175671	0.0802134	0.629824	-0.666978	insig
pme2266	C10H16N2O3S	Biotin	Others	Vitamin	58-85-5	3	34131	39680	47774	81454	71383	165030	1.12704	0.156106	0.27543	2.61436	1.38646	up
Cmpp008880	C15H16O3	Suberosin	Lignans and Coumarins	Coumarins	581-31-7	3	1679100	1929900	2019300	1773900	1731400	1906800	0.375929	0.574369	0.6637	0.961587	-0.0565107	insig
Lmmn005696	C15H16O3	Desoxyhemigossypol	Phenolic acids	Phenolic acids	57765-65-8	3	9009.2	13384	15121	32504	23818	26005	1.19134	0.0122169	0.0641893	2.19456	1.13393	up
pmf0527	C15H16O3	Osthole	Lignans and Coumarins	Coumarins	484-12-8	3	21110000	21903000	21729000	23813000	16498000	22684000	0.219493	0.822288	0.868566	0.973016	-0.0394646	insig
MWS5231	C13H24O4	Tridecanedioic acid	Organic acids	Organic acids	505-52-2	3	88915	82744	78284	72367	79360	74528	0.95935	0.110377	0.214659	0.905226	-0.143649	insig
Lmlp002963	C13H11NO4	Haplopine	Alkaloids	Alkaloids	5876-17-5	3	67638	63010	61885	26970	32701	39126	1.24361	0.00442405	0.0424977	0.513143	-0.962567	insig
Lmhp002031	C12H24N2O3	L-Leucyl-L-Leucine	Amino acids and derivatives	Amino acids and derivatives	3303-31-9	2	885390	693010	906910	559960	736650	805550	0.675308	0.270421	0.389652	0.845834	-0.241553	insig
pmb2591	C13H14N2O3	N-Acetyl-L-Tryptophan	Amino acids and derivatives	Amino acids and derivatives	1218-34-4	1	788600	1323100	1123300	740330	597210	533510	1.103	0.0851934	0.183301	0.578377	-0.789918	insig
Zmdp001647	C10H18N2O5	γ-Glutamyl-L-valine	Amino acids and derivatives	Amino acids and derivatives	-	3	138320	107930	99787	107340	77607	79477	0.900866	0.149988	0.26913	0.764149	-0.388073	insig
mws1108	C15H24N2O	Sophoridine	Alkaloids	Alkaloids	6882-68-4	3	5448.9	7988.3	10533	12614	9574.7	15714	0.925822	0.116165	0.22317	1.58124	0.661059	insig
pme3961	C10H13N5O3	2'-Deoxyadenosine	Nucleotides and derivatives	Nucleotides and derivatives	958-09-8	3	5433500	4358000	5007500	3618700	3605800	3369500	1.21294	0.0391199	0.118271	0.715859	-0.482252	insig
Lmcn009122	C16H30O2	(7Z)-Hexadecenoic acid*	Lipids	Free fatty acids	2416-19-5	3	4182.5	6528.5	3896.9	106320	118300	92267	1.30521	0.00508798	0.0432191	21.6929	4.43915	up
mws0361	C16H30O2	Palmitoleic Acid*	Lipids	Free fatty acids	373-49-9	1	9	9	9	39825	34152	37681	1.31545	0.00196959	0.033426	4135.48	12.0138	up
pma3101	C11H14NO6+	Nicotinate D-ribonucleoside	Others	Vitamin	17720-18-2	1	1277400	1973100	2121100	4136400	4234600	3436300	1.20211	0.00406535	0.0415691	2.1981	1.13626	up
mws1359	C16H16O3	Pterostilbene	Others	Stilbene	537-42-8	2	1347.3	1213.7	2112	1125.4	1236.7	2374.6	0.0172948	0.967573	0.978689	1.01363	0.0195333	insig
mws1488	C16H32O2	Palmitic acid	Lipids	Free fatty acids	21096	1	28266	22921	25098	22951	25213	29975	0.167737	0.823813	0.868566	1.0243	0.0346434	insig
mws0120	C8H20NO6P	Choline Alfoscerate	Lipids	PC	28319-77-9	2	127390	169650	177310	1638800	2145500	1984400	1.30757	0.00663272	0.0460417	12.1613	3.60422	up
MWSslk133	C14H26O4	1,14-Tetradecanedioic Acid	Organic acids	Organic acids	821-38-5	3	19113	16781	20914	12183	13542	13778	1.21103	0.0268238	0.0961799	0.695377	-0.524132	insig
Zmyn000110	C6H14NO8P	D-Glucosamine 1-phosphate	Others	Saccharides and Alcohols	2152-75-2	2	31840	40641	35266	25185	30914	28734	1.0418	0.0770887	0.170889	0.787335	-0.34495	insig
pmp001099	C15H17NO3	Platydesmine	Alkaloids	Quinoline alkaloids	2824-86-4	2	1125300	3068800	4024300	2688900	2887500	2589100	0.190094	0.985425	0.987502	0.993563	-0.00931632	insig
mws0866	C6H13O9P	D-Glucose 6-phosphate*	Others	Saccharides and Alcohols	56-73-5	1	4983000	2777400	1946800	3642900	3939600	4049700	0.567648	0.553166	0.646808	1.19831	0.260997	insig
pme3313	C6H13O9P	D-Fructose 6-phosphate*	Others	Saccharides and Alcohols	643-13-0	1	4208400	3312900	2591400	6553200	7038000	4875700	1.13168	0.0302965	0.100741	1.82611	0.868773	insig
mws1090	C6H13O9P	Glucose-1-phosphate*	Others	Saccharides and Alcohols	59-56-3	1	4726100	2899800	1873200	4589100	4532900	3592500	0.71258	0.329101	0.450972	1.3385	0.420612	insig
Zmnn010135	C15H16O4	Sibiricol	Lignans and Coumarins	Coumarins	26481-12-9	3	1231000	2008900	2181400	4989800	3710300	4585400	1.20215	0.00639303	0.0457522	2.45061	1.29314	up
Cmpp005475	C15H16O4	Meranzin	Lignans and Coumarins	Coumarins	23971-42-8	3	172890	139390	203570	338250	564280	527650	1.23127	0.0413406	0.121718	2.77247	1.47117	up
Cmpp007319	C15H16O4	7-Methoxy-5-Prenyloxycoumarin	Lignans and Coumarins	Coumarins	35590-41-1	3	918320	359340	467120	570520	1012600	543430	0.436047	0.608417	0.696275	1.21881	0.28547	insig
Cmpp007452	C15H16O4	Auraptenol	Lignans and Coumarins	Coumarins	1221-43-8	3	881430	373490	597740	436770	986800	554060	0.130806	0.860837	0.895328	1.06745	0.0941744	insig
Zmdp002216	C11H20N2O5	L-γ-Glutamyl-L-leucine	Amino acids and derivatives	Amino acids and derivatives	2566-39-4	2	40022	68845	78660	892020	907210	742440	1.29498	0.00316813	0.0381378	13.5536	3.76061	up
Zmpn000095	C6H15O9P	Sorbitol-6-phosphate	Others	Saccharides and Alcohols	20479-58-7	2	26342	19224	15650	35809	31808	28891	1.08569	0.0430294	0.123287	1.57652	0.65674	insig
mws0715	C13H16N2O4	Phenylacetyl-L-glutamine	Amino acids and derivatives	Amino acids and derivatives	28047-15-6	3	577250	345380	437320	910940	130930	383770	0.236222	0.934374	0.951381	1.0483	0.0680561	insig
Lmtn004049	C15H20O4	Abscisic acid	Organic acids	Organic acids	21293-29-8	3	23205	16887	23557	8189.3	5024.7	3043.9	1.2156	0.00562053	0.0434224	0.255431	-1.969	down
Lmlp003161	C14H20N2O3	N-Feruloylputrescine	Alkaloids	Phenolamine	501-13-3	2	321670	388460	410590	9	9	9	1.31559	0.00507962	0.0432191	2.40917e-05	-15.3411	down
Hmsn000210	C17H30O2	Methyl 7,10-hexadecadienoate	Lipids	Free fatty acids	-	2	3922300	2739700	2436800	3410100	2759700	2415300	0.174388	0.769157	0.825585	0.943542	-0.0838413	insig
pme0230	C10H13N5O4	Adenosine	Nucleotides and derivatives	Nucleotides and derivatives	58-61-7	1	2692600	2769600	2412900	1384800	1587500	1360100	1.28752	0.00152932	0.0330542	0.550139	-0.862132	insig
pme1184	C10H13N5O4	2'-Deoxyguanosine	Nucleotides and derivatives	Nucleotides and derivatives	961-07-9	3	1324700	1056100	1218600	851110	858740	824620	1.2224	0.0430402	0.123287	0.704137	-0.506072	insig
Zmjp000966	C10H13N5O4	Vidarabine	Others	Others	5536-17-4	1	2747300	2659400	2435600	1467600	1573900	1440000	1.2989	0.00234612	0.0343255	0.571452	-0.807295	insig
pme2890	C8H16N2O4S2	L-Homocystine	Amino acids and derivatives	Amino acids and derivatives	626-72-2	3	35180	21678	38250	28730	36783	24937	0.105577	0.815318	0.864401	0.951024	-0.0724462	insig
pme1119	C10H12N4O5	Inosine	Nucleotides and derivatives	Nucleotides and derivatives	58-63-9	3	317020	261490	372810	588180	561950	330590	0.916775	0.152226	0.27263	1.55649	0.638296	insig
mws1060	C10H12N4O5	9-(Arabinosyl)hypoxanthine	Nucleotides and derivatives	Nucleotides and derivatives	7013-16-3	2	4498500	3453300	3738800	1928700	1746300	1118100	1.2235	0.00520312	0.0432191	0.409996	-1.28632	down
pmp000086	C13H16O6	1-Feruloyl-sn-glycerol	Phenolic acids	Phenolic acids	-	3	37944	57864	44425	43578	33889	26860	0.843658	0.193346	0.317569	0.743955	-0.426713	insig
mws0383	C17H32O2	10-Heptadecenoic Acid	Lipids	Free fatty acids	29743-97-3	1	3000200	2462300	1656500	2908700	2013900	1621500	0.229833	0.743085	0.803038	0.919244	-0.12148	insig
Lmyn006227	C15H10O5	Galangin (3,5,7-Trihydroxyflavone)	Flavonoids	Flavonoid	548-83-4	3	9	9	9	4954.5	3015.1	3089	1.31298	0.0285072	0.0982771	409.578	8.67799	up
pmf0525	C16H14O4	Imperatorin	Lignans and Coumarins	Coumarins	482-44-0	3	22791	21731	26472	53422	74440	61932	1.28185	0.0185529	0.081308	2.67338	1.41867	up
Lmxn015337	C17H34O2	Methyl palmitate	Lipids	Free fatty acids	112-39-0	3	14439	11356	10656	10589	15542	11114	0.0697753	0.899327	0.924605	1.02178	0.0310884	insig
pmf0293	C18H38O	1-Octadecanol	Lipids	Free fatty acids	112-92-5	3	159890	153340	150380	157500	150820	160710	0.305109	0.678441	0.751978	1.01169	0.0167685	insig
pme1397	C15H11O5+	Pelargonidin	Flavonoids	Anthocyanins	7690-51-9	3	61986	23736	34612	59243	53237	49154	0.728968	0.349848	0.471923	1.34321	0.425686	insig
pme2960	C15H12O5	Naringenin chalcone*	Flavonoids	Chalcones	73692-50-9	1	93825	78397	81943	110450	106070	119060	1.20676	0.0117984	0.0626829	1.32032	0.400891	insig
pme3475	C15H12O5	Butin	Flavonoids	Dihydroflavone	492-14-8	3	370520	277220	295730	473890	472920	485750	1.22183	0.0271912	0.0963691	1.51839	0.602547	insig
mws0914	C15H12O5	Pinobanksin*	Flavonoids	Dihydroflavonol	548-82-3	3	48387	39901	51274	69563	62107	78122	1.18793	0.0179715	0.081063	1.50322	0.588053	insig
pme0376	C15H12O5	Naringenin (5,7,4'-Trihydroxyflavanone)*	Flavonoids	Dihydroflavone	480-41-1	1	49656	41256	43202	73234	66672	85643	1.24794	0.0182779	0.081063	1.68177	0.749981	insig
pme3472	C12H16O7	Arbutin	Phenolic acids	Phenolic acids	497-76-7	2	368030	232700	238130	216830	197020	208760	0.873222	0.243442	0.36983	0.74221	-0.430101	insig
Lmmn003323	C16H32O3	2-Hydroxyhexadecanoic acid	Organic acids	Organic acids	764-67-0	1	9719700	2323300	3337800	6797100	14090000	9556800	0.874693	0.185904	0.311436	1.97934	0.985023	insig
pmp001264	C16H35NO2	Hexadecylsphingosine	Lipids	Sphingolipids	-	1	9	9	9	784520	906830	825110	1.31547	0.00183353	0.033426	93202.2	16.5081	up
pmb1452	C16H35NO2	N-Lauryldiethanolamine	Lipids	Free fatty acids	1541-67-9	3	212230	191470	159670	9	9	9	1.31517	0.00655959	0.0458689	4.79259e-05	-14.3488	down
pme1201	C15H14O5	Phloretin	Flavonoids	Chalcones	60-82-2	3	5690.8	6820.3	9209.1	4551	2914.9	4043.7	1.12445	0.0633169	0.154001	0.529903	-0.9162	insig
pme1712	C11H20N2O6	L-Saccharopine	Amino acids and derivatives	Amino acids and derivatives	997-68-2	3	74123	50650	57975	152910	169470	149710	1.2803	0.000516926	0.0245798	2.58328	1.36921	up
mws1038	C11H22N2O4S	Pantetheine	Others	Others	496-65-1	3	25451	18754	29366	23291	20284	13750	0.704929	0.266104	0.385183	0.779179	-0.359973	insig
Lmlp012720	C16H22O4	Dibutyl phthalate*	Phenolic acids	Phenolic acids	84-74-2	1	26641000	26291000	24883000	22850000	20503000	20731000	1.2178	0.00977873	0.0564111	0.823543	-0.280084	insig
Lmxp011770	C16H22O4	Diisobutyl phthalate*	Phenolic acids	Phenolic acids	84-69-5	1	26969000	27297000	24606000	23447000	20223000	21075000	1.15275	0.0220635	0.0886095	0.820887	-0.284744	insig
MWSmce341	C16H22O4	Butyl isobutyl phthalate	Others	Others	17851-53-5	2	26870000	25966000	25195000	23559000	20987000	19797000	1.1549	0.038361	0.117303	0.824583	-0.278264	insig
mws5035	C15H22N2O3	L-Leucyl-L-phenylalanine	Amino acids and derivatives	Amino acids and derivatives	56217-82-4	2	9	9	9	163380	179790	197880	1.31565	0.00303828	0.0380393	20038.9	14.2905	up
mws0367	C18H30O2	α-Linolenic Acid	Lipids	Free fatty acids	463-40-1	1	13822000	11274000	12180000	7713100	8570800	6536600	1.22321	0.00818252	0.0516888	0.612204	-0.707917	insig
MWSmce692	C18H30O2	γ-Linolenic Acid	Lipids	Free fatty acids	506-26-3	1	220610	170040	177290	149550	182610	135710	0.833287	0.189226	0.314056	0.823802	-0.279631	insig
pmb1650	C18H30O2	Octadeca-11E,13E,15Z-trienoic acid	Lipids	Free fatty acids	25575-00-2	3	7368100	7549100	6561000	6187800	5330100	4912300	1.13848	0.02705	0.0963467	0.764971	-0.386523	insig
Lmbn005923	C18H30O2	Crepenynic acid	Lipids	Free fatty acids	2277-31-8	2	220310	188040	197470	169520	195440	148970	0.896239	0.144712	0.262484	0.848321	-0.237317	insig
pmb0889	C18H30O2	Punicic acid (9Z,11E,13Z-octadecatrienoic acid)	Lipids	Free fatty acids	544-72-9	2	3140200	1690000	1683200	1794300	1030700	1319600	0.829526	0.241182	0.366983	0.636319	-0.652178	insig
Lmhn002926	C13H12O7	p-Coumaroylmalic acid	Phenolic acids	Phenolic acids	-	2	454190	349010	330310	1209500	1216900	1314000	1.30036	8.00795e-05	0.00951945	3.29984	1.7224	up
mws0629	C13H16N2O5	L-Aspartyl-L-Phenylalanine	Amino acids and derivatives	Amino acids and derivatives	13433-09-5	3	73891	99097	87768	103030	99254	109240	0.936604	0.132894	0.247772	1.1947	0.256643	insig
mws1491	C18H32O2	Linoleic acid	Lipids	Free fatty acids	60-33-3	1	27363000	22775000	24174000	20953000	25141000	17354000	0.756918	0.254558	0.37885	0.853806	-0.228021	insig
Lmbn006152	C18H32O2	(9Z,11E)-Octadecadienoic acid	Lipids	Free fatty acids	2540-56-9	2	14231	14991	16257	14193	13423	11025	0.934287	0.125881	0.238027	0.849645	-0.235068	insig
YC512118	C18H35NO	Oleamide (9-Octadecenamide)	Lipids	Free fatty acids	301-02-0	1	14655	16865	13945	26914	28171	22761	1.24625	0.00951293	0.0561457	1.71222	0.775867	insig
mws2623	C18H34O2	11-Octadecanoic acid(Vaccenic acid)	Lipids	Free fatty acids	506-17-2	1	10884000	10081000	9107900	10160000	12937000	11105000	0.774757	0.238828	0.365153	1.1373	0.185617	insig
Lmyn012331	C18H34O2	Petroselinic acid	Lipids	Free fatty acids	593-39-5	2	10325000	9317300	8870800	9924800	12336000	10208000	0.810179	0.224067	0.349537	1.13873	0.187429	insig
pme1178	C10H13N5O5	Guanosine	Nucleotides and derivatives	Nucleotides and derivatives	118-00-3	3	26688000	19445000	20311000	6335300	9216800	9386500	1.24349	0.0147383	0.0718774	0.375333	-1.41376	down
pmp001252	C17H17NO3	p-Coumaroyltyramine	Alkaloids	Phenolamine	36417-86-4	3	614890	808730	903470	3036800	3347400	1207500	1.10297	0.117114	0.224095	3.26231	1.7059	up
mws0129	C16H12O5	Genkwanin (Apigenin 7-methyl ether)	Flavonoids	Flavonoid	437-64-9	3	24502	261090	40184	11179	248910	21144	0.277736	0.89815	0.924395	0.863271	-0.212114	insig
mws0918	C16H12O5	Prunetin (5,4'-Dihydroxy-7-methoxyisoflavone)	Flavonoids	Isoflavones	552-59-0	1	224700	2010600	365820	70241	1552300	120510	0.459973	0.723316	0.784025	0.670116	-0.577518	insig
mws0051	C16H12O5	Acacetin	Flavonoids	Flavonoid	480-44-4	3	39802	302120	46372	12352	240360	18948	0.431811	0.751264	0.80729	0.699625	-0.515347	insig
mws4160	C16H12O5	Wogonin (5,7-Dihydroxy-8-Methoxyflavone)	Flavonoids	Flavonoid	632-85-9	3	11081	648810	140910	27165	5925.1	14923	0.830335	0.326167	0.448893	0.0599563	-4.05994	insig
mws0668	C10H12N4O6	Xanthosine	Nucleotides and derivatives	Nucleotides and derivatives	146-80-5	1	12053000	9915300	12641000	4698200	3935800	3377900	1.28477	0.00468345	0.0432191	0.347071	-1.5267	down
Zmyn005026	C18H36O2	16-Methylheptadecanoic acid	Lipids	Free fatty acids	2724-58-5	2	1784100	3669700	2331500	3210900	2036500	2723500	0.123298	0.930249	0.949214	1.02384	0.03399	insig
mws1489	C18H36O2	Stearic Acid	Lipids	Free fatty acids	21128	1	30862000	42798000	41693000	31296000	31487000	33736000	0.818604	0.238048	0.364611	0.836727	-0.257171	insig
Lmgp004283	C16H13O5+	5-Methoxyluteolinidin	Flavonoids	Flavonoid	-	2	245210	204870	227680	19491	8605	5428.5	1.28277	0.0010983	0.0316052	0.0494637	-4.33749	down
pma1751	C12H15NO7	N-(beta-D-Glucosyl)nicotinate	Others	Vitamin	-	2	73107	61889	69751	162490	110420	161060	1.23808	0.0423493	0.122414	2.11954	1.08375	up
pmp001269	C18H39NO	Hexadecyl ethanolamine	Alkaloids	Alkaloids	-	3	28387	121620	130660	52270	14081	17250	0.90676	0.172413	0.297577	0.297865	-1.74727	insig
Hmbp002730	C15H10O6	Isoscutellarein	Flavonoids	Flavonoid	41440-05-5	1	9	6998.6	9	2538.2	6028.1	9	0.361196	0.867661	0.900814	1.22214	0.289415	insig
pme0088	C15H10O6	Luteolin (5,7,3',4'-Tetrahydroxyflavone)	Flavonoids	Flavonoid	491-70-3	1	2107.7	12358	6508.4	3055.7	4757.8	3941.6	0.43657	0.40978	0.523591	0.560458	-0.835322	insig
Cmsp008121	C16H14O5	7-O-Methylnaringenin	Flavonoids	Flavonoid	-	3	11376	8461.8	9697.4	13235	35844	32810	1.08457	0.130852	0.245444	2.77259	1.47123	up
pmp001006	C16H14O5	1,3,7-Trimethoxyxanthone	Others	Xanthone	3722-54-1	3	112700	156620	164740	26583	36664	43220	1.27124	0.0150385	0.0729673	0.245282	-2.02749	down
pme1662	C16H14O5	5,4'-Dihydroxy-7-methoxyflavanone (Sakuranetin)	Flavonoids	Flavonoid	2957-21-3	3	7811.7	7330.6	7113.6	14452	32650	35551	1.19907	0.092686	0.193035	3.71376	1.89288	up
MWSslk132	C16H30O4	Hexadecanedioic acid	Organic acids	Organic acids	505-54-4	2	156260	163390	185680	109020	89287	90506	1.26584	0.00378018	0.0415225	0.571533	-0.80709	insig
Zmyn005252	C17H34O3	3-Hydroxy-palmitic acid methyl ester	Others	Others	51883-36-4	3	49257	14377	21325	31663	49237	40866	0.709798	0.378387	0.49731	1.43323	0.519273	insig
mws1436	C18H38O2	1,18-Octadecanediol	Lipids	Free fatty acids	3155-43-9	2	5863.1	2567.9	6535.8	3309.2	7112.6	3169.2	0.151644	0.809526	0.860178	0.908077	-0.139114	insig
mws0064	C15H12O6	Eriodictyol (5,7,3',4'-Tetrahydroxyflavanone)	Flavonoids	Dihydroflavone	552-58-9	1	12573	5978.2	7293.2	6644.3	8146.4	4878.9	0.54185	0.42676	0.531216	0.761078	-0.393884	insig
Hmhn000927	C12H16O8	Phloroglucinol-1-O-β-D-glucopyranoside	Phenolic acids	Phenolic acids	-	2	9	9	9	68294	58448	55531	1.31516	0.0040154	0.0415691	6750.85	12.7209	up
pmf0541	C16H16O5	Shikonin	Alkaloids	Alkaloids	517-89-5	3	29442	32835	36558	23978	31534	29989	0.757953	0.22433	0.349537	0.865088	-0.209081	insig
pmb3081	C6H11PO11	Glucarate O-Phosphoric acid	Others	Saccharides and Alcohols	-	2	4618700	4658900	3977000	12015000	11081000	9750200	1.29345	0.00556571	0.0434224	2.4781	1.30923	up
pmb2657	C10H18N4O6	Argininosuccinic acid	Organic acids	Organic acids	2387-71-5	2	67475	43709	35969	78665	81705	71650	1.04488	0.0850929	0.183301	1.57673	0.656932	insig
pmf0314	C20H34O	(+)-cis-Abienol	Others	Saccharides and Alcohols	17990-16-8	3	13799	14195	8758.1	9656.2	6470.6	10245	0.795931	0.18601	0.311436	0.717559	-0.478831	insig
Zmyn004548	C18H28O3	12-Oxo-phytodienoic acid	Lipids	Free fatty acids	85551-10-6	3	53005	35456	35791	19438	17015	14931	1.23987	0.0465614	0.130235	0.413547	-1.27388	down
MWSmce689	C19H32O2	Methyl linolenate	Organic acids	Organic acids	301-00-8	2	95913	101980	114010	43082	256800	92923	0.0347787	0.717119	0.779406	1.25938	0.332716	insig
Zmdn001564	C14H18N2O5	γ-Glutamylphenylalanine	Amino acids and derivatives	Amino acids and derivatives	7432-24-8	3	58361	53298	47107	20110	15867	9004.4	1.23745	0.00116942	0.0316052	0.283319	-1.8195	down
pmb2792	C18H30O3	13-Hydroxy-6,9,11-octadecatrienoic acid	Lipids	Free fatty acids	74784-20-6	3	109090	126100	105130	69942	95800	69992	1.11846	0.0353074	0.111552	0.692683	-0.529732	insig
pmb2787	C18H30O3	9-Oxo-10E,12Z-octadecadienoic acid	Lipids	Free fatty acids	54232-59-6	1	34819	27290	31292	14279	14393	12792	1.28973	0.0119167	0.06296	0.443935	-1.17158	down
Zmpn003368	C18H30O3	13S-Hydroxy-9Z,11E,15Z-octadecatrienoic acid	Lipids	Free fatty acids	87984-82-5	1	162410	89546	84854	50078	39918	34007	1.17954	0.101083	0.20238	0.368169	-1.44156	down
Zmyn004732	C18H30O3	2R-hydroxy-9Z,12Z,15Z-octadecatrienoic acid	Others	Others	-	3	136740	79364	64445	57272	60857	59495	0.869734	0.25963	0.382803	0.63313	-0.659426	insig
pmb2786	C18H30O3	9-Hydroxy-10,12,15-octadecatrienoic acid*	Lipids	Free fatty acids	89886-42-0	1	17450	10464	11712	7147.2	7285.2	6277.6	1.16393	0.0963418	0.197034	0.522637	-0.93612	insig
Lmbn005443	C18H30O3	13-KODE; (9Z,11E)-13-Oxooctadeca-9,11-dienoic acid*	Lipids	Free fatty acids	54739-30-9	3	18024	11059	10849	8475.7	8409.3	5909.3	1.0525	0.124145	0.235652	0.570828	-0.808872	insig
pmn001687	C13H12O8	Cis-Coutaric acid	Phenolic acids	Phenolic acids	67920-37-0	3	185280	231460	272430	189330	264280	226620	0.0518516	0.932873	0.950871	0.987028	-0.0188373	insig
Hmqp005455	C18H32O3	15(R)-Hydroxylinoleic Acid*	Lipids	Free fatty acids	177931-23-6	2	201070	126390	136550	109510	105260	86109	1.03676	0.135969	0.252551	0.648432	-0.624972	insig
Hmqp005411	C18H32O3	9-Oxo-12Z-Octadecenoic acid*	Lipids	Free fatty acids	112543-32-5	2	182700	130380	126520	93963	71688	76823	1.17907	0.0543845	0.141855	0.551579	-0.858361	insig
Rfmb091	C18H32O3	9S-Hydroxy-10E,12Z-octadecadienoic acid*	Lipids	Free fatty acids	15514-85-9	1	1411400	757400	683850	643830	430080	446250	0.982886	0.187683	0.312586	0.532894	-0.90808	insig
pmb2799	C18H32O3	12,13-Epoxy-9-Octadecenoic Acid	Lipids	Free fatty acids	6799-85-5	3	87688	54233	51703	53171	43737	37541	0.865396	0.225019	0.349663	0.694382	-0.526199	insig
Lmbn005662	C18H32O3	9(10)-EpOME;(9R,10S)-(12Z)-9,10-Epoxyoctadecenoic acid	Lipids	Free fatty acids	16833-56-0	3	378300	225690	204600	211040	206310	191130	0.699792	0.346904	0.469283	0.75252	-0.410199	insig
Lmbn005369	C18H32O3	13(S)-HODE;13(S)-Hydroxyoctadeca-9Z,11E-dienoic acid*	Lipids	Free fatty acids	10219-69-9	2	1477100	769040	689730	649790	450140	450250	0.972788	0.200658	0.326618	0.528014	-0.921352	insig
pme1474	C11H15N5O3S	5'-Deoxy-5'-(methylthio)adenosine	Nucleotides and derivatives	Nucleotides and derivatives	2457-80-9	1	46692000	37078000	38282000	28192000	24375000	21235000	1.20891	0.0155756	0.0748458	0.604677	-0.725764	insig
pmb0197	C11H15N5O5	N7-Methylguanosine	Nucleotides and derivatives	Nucleotides and derivatives	20244-86-4	3	155910	118520	162800	63534	99432	61462	1.15898	0.0188659	0.0817113	0.513295	-0.96214	insig
pmp001204	C17H14O5	Apigenin-7,4'-dimethyl ether	Flavonoids	Flavonoid	5128-44-9	3	50550	647910	126190	18379	401770	27673	0.512052	0.612368	0.698276	0.543045	-0.880857	insig
Cmpp010709	C19H22O3	Aurapten	Lignans and Coumarins	Coumarins	495-02-3	3	20325	66314	38536	9225900	10167000	10936000	1.30404	0.00238888	0.0344215	242.292	7.9206	up
Zmyn004714	C18H34O3	Ricinoleic acid	Lipids	Free fatty acids	141-22-0	2	74644	64105	61214	397740	390300	392850	1.31345	5.15157e-06	0.00489915	5.90554	2.56207	up
pmf0297	C20H42O	1-Eicosanol	Lipids	Free fatty acids	629-96-9	3	73845	55761	60139	341580	357780	377480	1.31093	0.000129255	0.0106887	5.6752	2.50467	up
mws0724	C10H13N5O6	8-Hydroxyguanosine	Nucleotides and derivatives	Nucleotides and derivatives	3868-31-3	1	7460.6	9667.8	4218.8	4299.7	5698	8046.4	0.293029	0.601233	0.690547	0.845268	-0.24252	insig
Lmjp004941	C16H12O6	Rhamnocitrin (7-Methylkaempferol)*	Flavonoids	Flavonoid	569-92-6	1	60576	792660	205420	48494	215480	38502	0.676962	0.3778	0.49731	0.285717	-1.80734	insig
pmp000001	C16H12O6	Hispidulin (5,7,4'-Trihydroxy-6-methoxyflavone)*	Flavonoids	Flavonoid	1447-88-7	1	57341	812310	196500	53834	230010	35440	0.634672	0.396933	0.512885	0.299474	-1.7395	insig
pmp000548	C16H12O6	Pratensein	Flavonoids	Isoflavones	2284-31-3	3	55916	783760	196200	52260	222890	36625	0.63472	0.393492	0.509825	0.300977	-1.73227	insig
pmp001127	C16H12O6	Chrysoeriol*	Flavonoids	Flavonoid	491-71-4	3	56748	769010	200990	52740	224810	33801	0.646195	0.388581	0.506209	0.30324	-1.72147	insig
Zmhp003514	C16H12O6	6,7,8-Tetrahydroxy-5-methoxyflavone	Flavonoids	Flavonoid	-	1	53574	799860	169220	45262	218240	34705	0.626956	0.408629	0.523023	0.291601	-1.77793	insig
Zmhn001926	C13H16O8	1-O-Salicyl-D-glucose	Phenolic acids	Phenolic acids	60517-74-0	1	1525600	1123300	1054000	580730	518750	528920	1.25856	0.0403372	0.119901	0.439763	-1.1852	down
Zmhn001358	C13H16O8	4-O-Glucosyl-4-hydroxybenzoic acid	Phenolic acids	Phenolic acids	-	1	1515700	1135200	1054400	661150	547460	577390	1.24051	0.0397406	0.119222	0.482012	-1.05286	down
Hmtn001302	C13H16O8	Glucosyloxybenzoic acid	Phenolic acids	Phenolic acids	-	2	1590500	1091300	1045700	598950	532730	537750	1.23695	0.057054	0.145076	0.447869	-1.15885	down
pmb3142	C13H16O8	Salicylic acid-2-O-glucoside	Phenolic acids	Phenolic acids	10366-91-3	3	23121000	17902000	15848000	13394000	11008000	9985000	1.14488	0.0559774	0.144131	0.604649	-0.72583	insig
pmc1990	C17H16O5	4'-Hydroxy-5,7-dimethoxyflavanone	Flavonoids	Flavanols	-	3	4150000	3790900	4079400	3477300	4735600	5020700	0.461782	0.485998	0.582829	1.10094	0.138733	insig
mws2367	C14H20O7	Salidroside	Phenolic acids	Phenolic acids	10338-51-9	2	229640	173850	158670	100330	90465	84313	1.24114	0.0419401	0.121973	0.489377	-1.03098	down
mws4019	C20H28O2	Sugiol	Terpenoids	Ditepenoids	511-05-7	3	10356	15650	18309	10660	10964	11606	0.804379	0.253699	0.378163	0.749859	-0.415309	insig
MWS5235	C18H36O3	12-Hydroxyoctadecanoic acid	Lipids	Free fatty acids	106-14-9	3	9309.1	7523.6	7633.1	8411.5	10590	10265	0.892464	0.148804	0.267509	1.19622	0.258484	insig
MWS4295	C18H36O3	DL-2-hydroxystearic acid	Lipids	Free fatty acids	629-22-1	3	122950	31448	39284	55115	116560	70222	0.480505	0.670885	0.746213	1.24894	0.320703	insig
Zmyn005384	C18H36O3	2R-Hydroxyoctadecanoic Acid	Lipids	Free fatty acids	26633-48-7	3	114280	26931	35289	46473	112130	67918	0.485592	0.651388	0.729646	1.28341	0.359977	insig
Lmqn008288	C18H36O3	3-Hydroxyoctadecanoic Acid	Lipids	Free fatty acids	45261-96-9	1	180370	194690	196120	65662	88485	87725	1.27918	0.00054677	0.0247609	0.42346	-1.2397	down
pmb3079	C8H16NO9P	N-Acetyl-D-glucosamine-1-phosphate	Others	Saccharides and Alcohols	6866-69-9	2	228960	201820	185070	633380	559830	504420	1.29427	0.00585288	0.0441753	2.75656	1.46287	up
Zmnn009241	C16H15NO5	Citpressine I	Alkaloids	Alkaloids	81525-58-8	1	30284000	47647000	49047000	5201600	3923200	6264100	1.29107	0.0241378	0.0934948	0.121193	-3.04462	down
Cmsp007228	C16H14O6	7-O-Methyleriodictyol	Flavonoids	Flavanols	51857-11-5	3	47078	62440	67213	83795	73658	82447	1.05339	0.0540615	0.141855	1.35743	0.440878	insig
mws0463	C16H14O6	Hesperetin	Flavonoids	Dihydroflavone	520-33-2	1	8075.3	4650.9	3582.7	29971	10361	8746.1	0.97151	0.247927	0.373171	3.00928	1.58942	insig
mws0397	C20H30O2	Cis-5,8,11,14,17-Eicosapentaenoic Acid	Lipids	Free fatty acids	10417-94-4	3	9	9	9	36676	40903	44548	1.31564	0.00310858	0.0380393	4523.22	12.1431	up
Cmmn013378	C20H30O2	Levopimaric acid	Terpenoids	Ditepenoids	79-54-9	2	397970	288180	369840	107590	73768	41600	1.24182	0.00423471	0.0415691	0.211136	-2.24375	down
mws1375	C12H21N3O6	Nicotianamine	Amino acids and derivatives	Amino acids and derivatives	34441-14-0	1	87196	84124	62078	11957	10962	4716.5	1.26938	0.00880403	0.054017	0.118405	-3.0782	down
mws0369	C20H32O2	Arachidonic Acid	Lipids	Free fatty acids	506-32-1	1	44261	47620	35841	1029800	1193600	1135500	1.31346	0.0018848	0.033426	26.2985	4.71691	up
Zmpn003698	C20H34O2	11,14,17-Eicosatrienoic acid*	Lipids	Free fatty acids	17046-59-2	2	9	9	9	12111	17332	10413	1.31381	0.023718	0.092442	1476.15	10.5276	up
Lmbn006210	C20H34O2	Dihomo-gamma-linolenic acid; (8Z,11Z,14Z)-Icosatrienoic acid*	Lipids	Free fatty acids	1783-84-2	2	9	9	9	11301	17642	9039.3	1.31278	0.0390093	0.118271	1406.75	10.4582	up
pme1373	C9H14N3O7P	2'-Deoxycytidine-5'-monophosphate	Nucleotides and derivatives	Nucleotides and derivatives	1032-65-1	2	16115	17485	6378.8	5785.4	9300.3	7777	0.743422	0.239822	0.366084	0.571871	-0.806239	insig
pme1086	C10H17N3O6S	Glutathione reduced form	Amino acids and derivatives	Amino acids and derivatives	70-18-8	1	1024700	1049400	326370	26329	21578	25961	1.2801	0.0820521	0.178562	0.0307723	-5.02222	down
pmn001610	C20H36O2	Eicosadienoic acid	Lipids	Free fatty acids	5598-38-9	2	370270	375960	394260	438530	642370	439570	0.949237	0.2014	0.326618	1.33317	0.414864	insig
pmb2857	C11H19NO9	L-Glutamic acid-O-glycoside	Amino acids and derivatives	Amino acids and derivatives	-	3	32874	36376	28940	78879	57493	63021	1.24826	0.0247752	0.0944025	2.03069	1.02197	up
Lmhn003074	C14H14O8	Feruloylmalic acid	Phenolic acids	Phenolic acids	-	1	62135	38957	95158	55781	51857	67182	0.12805	0.709262	0.775297	0.890803	-0.166822	insig
pmb2791	C18H30O4	9-Hydroperoxy-10E,12,15Z-octadecatrienoic acid	Lipids	Free fatty acids	111004-08-1	3	1057400	750000	956480	540560	665190	585360	1.14465	0.0542936	0.141855	0.648042	-0.625841	insig
pmp001214	C16H24NO5+	Sinapine	Alkaloids	Alkaloids	18696-26-9	3	40456	81777	72988	9756.2	16996	9414	1.24948	0.0472069	0.130505	0.185258	-2.43239	down
Zmzn003953	C18H30O4	13(s)-hydroperoxy-(9z,11e,15z)-octadecatrienoic acid	Others	Others	67597-26-6	2	414220	347420	321060	214550	183020	202710	1.25579	0.0199674	0.083285	0.554429	-0.850926	insig
mws0636	C18H20N2O3	L-Phenylalanyl-L-phenylalanine	Amino acids and derivatives	Amino acids and derivatives	2577-40-4	3	31150	43875	58298	30562	48234	37050	0.364684	0.57342	0.663507	0.868912	-0.202717	insig
pmb2804	C18H32O4	13S-Hydroperoxy-9Z,11E-octadecadienoic acid	Lipids	Free fatty acids	33964-75-9	3	239590	200250	209570	184450	178080	186420	1.08122	0.100158	0.201376	0.845306	-0.242455	insig
Zmjn004133	C18H32O4	9S-Hydroperoxy-10E,12Z-octadecadienoic acid	Lipids	Free fatty acids	5502-91-0	3	371480	239570	240770	189070	234880	196380	0.890268	0.213659	0.340923	0.728241	-0.457513	insig
pmn001689	C18H32O4	9-Hydroxy-12-oxo-15(Z)-octadecenoic acid	Lipids	Free fatty acids	-	2	19974	16734	16450	17471	16230	17162	0.373181	0.575807	0.664554	0.956827	-0.0636703	insig
Lmbn005287	C18H32O4	7S,8S-DiHODE; (9Z,12Z)-(7S,8S)-Dihydroxyoctadeca-9,12-dienoic acid	Lipids	Free fatty acids	143288-65-7	3	36284	54492	62949	67540	65846	95235	0.932253	0.115924	0.223165	1.48721	0.572606	insig
Lmbn004685	C18H32O4	5S,8R-DiHODE; (5S,8R,9Z,12Z)-5,8-Dihydroxyoctadeca-9,12-dienoate	Lipids	Free fatty acids	-	2	13773	12984	13464	3046.5	14789	4959.5	0.852047	0.251062	0.375765	0.566744	-0.819232	insig
pmf0397	C20H40O2	Arachidic acid	Lipids	Free fatty acids	506-30-9	3	19265	20844	18860	25409	22332	29956	1.10058	0.0971854	0.197909	1.31759	0.397902	insig
mws1433	C18H19NO4	N-Feruloyltyramine	Alkaloids	Phenolamine	66648-43-9	3	107970	100690	126750	249350	229750	96529	0.769149	0.235243	0.362282	1.7162	0.779214	insig
HJAP057	C17H14O6	Dihydroxy-dimethoxyflavone	Flavonoids	Flavonoid	-	1	156040	7862600	1338800	189660	805210	303570	0.593766	0.37875	0.49731	0.13876	-2.84933	insig
Lmsp009300	C17H14O6	5,6-Dihydroxy-7,4'-dimethoxyflavone (Ladanein)	Flavonoids	Flavonoid	10176-71-3	3	6621.6	83244	26561	3938.9	13856	1937.5	0.886699	0.294251	0.415183	0.169484	-2.56078	insig
Hmxp007521	C17H14O6	3’,4’-Dihydroxy-7,5’-dimethoxyflavone	Flavonoids	Flavonoid	-	1	67772	3348800	607580	91658	392470	122500	0.5774	0.378593	0.49731	0.150747	-2.7298	insig
MWSmce415	C17H14O6	Cirsimaritin (4',5-dihydroxy-6,7-dimethoxyflavone)	Lignans and Coumarins	Coumarins	6601-62-3	1	162220	7695900	1320100	210310	830930	278010	0.596225	0.37965	0.49731	0.143737	-2.7985	insig
Cmzp002057	C14H18O8	6-O-Acetylarbutin	Phenolic acids	Phenolic acids	10338-88-2	3	32186	30428	30168	34454	44317	38387	1.09893	0.0988784	0.199223	1.26272	0.336539	insig
Lmbn005487	C18H34O4	12,13-DHOME; (9Z)-12,13-Dihydroxyoctadec-9-enoic acid	Lipids	Free fatty acids	263399-35-5	2	45825	48618	53396	22460	19046	22844	1.29538	0.00137528	0.032996	0.435271	-1.20001	down
mws0988	C16H12O7	Rhamnetin	Flavonoids	Flavonols	90-19-7	1	1798.8	4530	2488.2	9	9	9	1.31102	0.070181	0.163986	0.00306227	-8.35118	down
pmp000003	C16H12O7	Nepetin (5,7,3',4'-Tetrahydroxy-6-methoxyflavone)	Flavonoids	Flavonoid	520-11-6	3	11676	320740	118850	33615	40712	26315	0.529691	0.326029	0.448893	0.223021	-2.16475	insig
pmb2871	C13H16O9	1-O-Gentisoyl-D-glucoside*	Phenolic acids	Phenolic acids	23445-11-6	1	3396700	2720000	2898200	3652700	3964100	3800400	1.14371	0.0417075	0.121973	1.26648	0.340825	insig
pmn001367	C13H16O9	Protocatechuic acid-4-O-glucoside*	Phenolic acids	Phenolic acids	-	1	3177000	2821500	3050400	4225200	4565700	3514500	1.14109	0.0603865	0.150033	1.35988	0.443477	insig
Lmsp009013	C17H16O6	4',6-Dihydroxy-5,7-dimethoxyflavanone	Flavonoids	Dihydroflavone	6951-57-1	2	8466.1	17718	12398	9719	12049	12156	0.265408	0.627084	0.710906	0.879268	-0.185625	insig
Smln010906	C20H28O3	catechol	Terpenoids	Ditepenoids	-	3	108790	60244	61534	136120	86401	110220	0.850796	0.188747	0.313808	1.44314	0.529207	insig
pme3459	C20H28O3	Cafestol	Terpenoids	Ditepenoids	469-83-0	3	130920	146240	153690	38541	38436	39922	1.31242	0.00392628	0.0415691	0.271322	-1.88192	down
mws0945	C20H30O3	15-Oxo-5Z,8Z,11Z,13E-eicosatetraenoic acid*	Lipids	Free fatty acids	81416-72-0	1	9	9	9	32208	31495	38053	1.31567	0.00373209	0.0415225	3768.74	11.8799	up
mws0955	C20H30O3	12-Oxo-5,8,10,14-eicosatetraenoic acid*	Lipids	Free fatty acids	108437-64-5	1	9	9	9	30602	32338	37491	1.31568	0.00379859	0.0415225	3719.67	11.861	up
pmb0751	C16H16O7	Trans-5-O-(p-Coumaroyl)shikimate	Phenolic acids	Phenolic acids	-	3	3282200	1522900	1434100	1920100	1576900	1730200	0.233606	0.633239	0.714421	0.8378	-0.255323	insig
pmb3075	C16H16O7	3-O-p-Coumaroylshikimic acid	Phenolic acids	Phenolic acids	-	3	376720	178230	229730	237900	206700	262010	0.150147	0.709067	0.775297	0.900507	-0.15119	insig
mws0879	C20H32O3	12S-Hydroxy-5Z,8Z,10E,14Z-eicosatetraenoic acid	Lipids	Free fatty acids	54397-83-0	3	9	9	9	27689	30203	40075	1.31559	0.0131424	0.0661293	3628.41	11.8251	up
mws0959	C20H32O3	20-Hydroxyeicosatetraenoic acid(20-HETE)	Lipids	Free fatty acids	79551-86-3	3	4531.3	8425.8	12378	26198	13864	8601.2	0.752408	0.273138	0.392378	1.92078	0.941694	insig
mws0954	C20H32O3	5-Hydroxy-6,8,11,14-eicosatetraenoic acid	Lipids	Free fatty acids	70608-72-9	2	2118.9	1967.9	1250.1	6505.7	7203.2	6882.4	1.27973	0.000177861	0.0120818	3.85829	1.94796	up
mws0582	C11H19N3O6S	S-(Methyl)glutathione	Amino acids and derivatives	Amino acids and derivatives	2922-56-7	2	148630	120350	240730	71193	48205	58020	1.19698	0.0883515	0.186869	0.348076	-1.52252	down
pme3188	C9H13N2O9P	Uridine 5'-monophosphate	Nucleotides and derivatives	Nucleotides and derivatives	58-97-9	2	152800	68595	56199	242280	275740	123560	0.978917	0.103743	0.20597	2.31122	1.20865	insig
Hmqp006023	C20H36O3	Ethyl 9-Hydroxy-10,12-octadecadienoic acid	Lipids	Free fatty acids	-	3	98181	129250	150770	29077	28185	24796	1.29871	0.0224202	0.089246	0.216969	-2.20444	down
mws0983	C20H39NO2	N-Oleoylethanolamine	Alkaloids	Alkaloids	111-58-0	1	1041400	1280400	1585700	284260	324250	267970	1.29749	0.0224288	0.089246	0.224307	-2.15645	down
Zmhn002301	C15H18O8	p-Coumaric acid-4-O-glucoside	Phenolic acids	Phenolic acids	117405-48-8	1	500550	436900	375510	458940	474940	438920	0.378835	0.641797	0.722306	1.04558	0.0642985	insig
Lmsn003111	C15H18O8	1-O-p-Coumaroyl-β-D-glucose	Phenolic acids	Phenolic acids	7139-64-2	3	428130	495920	374690	361530	364730	367040	0.942475	0.189924	0.314209	0.841816	-0.248423	insig
Hmhn003067	C15H18O8	Phenylpropionic acid-O-β-D-glucopyranoside	Phenolic acids	Phenolic acids	-	1	107640	99876	118720	119430	130580	102450	0.508755	0.431226	0.53402	1.08038	0.111544	insig
Zmzn001549	C15H18O8	Ferulic acid-1-O-glucoside	Others	Others	14364-05-7	1	1107800	924340	836470	671590	711410	801310	1.05215	0.0858988	0.184401	0.761452	-0.393174	insig
pmn001419	C15H18O8	1-O-[(E)-p-Cumaroyl]-D-glucose	Phenolic acids	Phenolic acids	-	1	2398600	2155700	2134100	1488000	1488500	1693700	1.24613	0.0040319	0.0415691	0.698254	-0.518177	insig
Lmsn000363	C16H22O7	Raspberryketone glucoside	Phenolic acids	Phenolic acids	38963-94-9	3	2237500	2214100	2891800	1878700	1829500	2020200	1.04385	0.128656	0.24228	0.780075	-0.358316	insig
HJAP158	C19H21NO4	Aromatide	Others	Others	-	3	188280	221460	240080	94101	65112	44271	1.23731	0.00208858	0.0335195	0.313139	-1.67512	down
Lmsp011263	C18H16O6	6-Hydroxy-5,7,4'-trimethoxyflavone	Flavonoids	Flavonoid	6938-19-8	1	58621	3370200	800490	71537	330180	113960	0.634384	0.342453	0.464922	0.121929	-3.03588	insig
Lmtn002233	C15H20O8	Androsin	Others	Others	531-28-2	3	561150	263120	234650	181140	137560	120570	1.05694	0.183361	0.309421	0.414828	-1.26941	down
pmn001691	C18H32O5	9,12,13-Trihydroxy-10,15-octadecadienoic acid	Lipids	Free fatty acids	-	3	126600	80891	79963	73072	88193	76848	0.59445	0.399357	0.514619	0.828352	-0.271685	insig
mws0884	C10H12N5O6P	Cyclic 3',5'-Adenylic acid	Nucleotides and derivatives	Nucleotides and derivatives	60-92-4	3	143190	176390	164990	84035	95795	92604	1.27726	0.0110695	0.0605006	0.562218	-0.830798	insig
pmp000004	C17H14O7	4',5,7-Trihydroxy-3',6-dimethoxyflavone (Jaceosidin)	Flavonoids	Flavonoid	18085-97-7	1	22710	374410	100320	21068	38949	24219	0.805141	0.325669	0.448893	0.169339	-2.56201	insig
Lmjp005016	C17H14O7	Cirsiliol (3',4',5-Trihydroxy-6,7-Dimethoxyflavone)	Flavonoids	Flavonoid	34334-69-5	3	11290	773200	197090	37370	58006	57702	0.44664	0.351714	0.473767	0.155951	-2.68084	insig
Smhn102346	C14H18O9	2,4,6-trihydroxy-acetophenone-4-O-b-D-glucopyranoside	Phenolic acids	Phenolic acids	-	3	1075100	862210	922560	751520	709890	643290	1.16514	0.0392794	0.118271	0.735943	-0.442335	insig
Lmtn002565	C14H18O9	1-O-Vanilloyl-D-Glucose	Phenolic acids	Phenolic acids	-	2	105330	113950	141740	766220	665560	203650	1.10293	0.133135	0.247772	4.53003	2.17952	up
pmn001517	C15H22O8	3,4,5-Trimethoxyphenyl-1-O-Glucoside	Phenolic acids	Phenolic acids	-	2	1773000	1405400	1509900	1190500	1102000	1059300	1.19117	0.0429405	0.123287	0.714929	-0.484129	insig
Hmqn003054	C18H34O5	9,10,11-Trihydroxy-12-octadecenoic acid	Lipids	Free fatty acids	61911-67-9	3	95798	93425	118320	107350	115800	112520	0.670536	0.359763	0.481879	1.09146	0.126255	insig
pmn001694	C18H34O5	9,10,13-Trihydroxy-11-Octadecenoic Acid	Lipids	Free fatty acids	29907-57-1	3	939670	601420	683390	924990	1334100	1118800	1.03657	0.0707251	0.164219	1.51851	0.602654	insig
Lmbn004240	C18H34O5	9,10-Dihydroxy-12,13-epoxyoctadecanoic acid	Lipids	Free fatty acids	-	1	3044	1865.8	1611.7	7931.8	12795	5107.8	1.18059	0.0979991	0.198715	3.96145	1.98603	up
Lmbn003970	C18H34O5	9,12,13-TriHOME; 9(S),12(S),13(S)-Trihydroxy-10(E)-octadecenoic acid	Lipids	Free fatty acids	97134-11-7	3	15698	13903	15964	14853	15331	11151	0.581206	0.410511	0.523591	0.907166	-0.140562	insig
pmp001284	C19H38O4	Monopalmitin	Lipids	Glycerol ester	542-44-9	1	390200	387740	381650	394910	375980	309080	0.614998	0.41537	0.526789	0.931338	-0.102624	insig
pme3184	C10H14N5O6P	2'-Deoxyadenosine-5'-monophosphate	Nucleotides and derivatives	Nucleotides and derivatives	653-63-4	2	1063500	1022500	1052800	968970	865650	864840	1.17074	0.0392992	0.118271	0.860029	-0.217542	insig
pmb0789	C14H21NO8	Pyridoxine-5'-O-glucoside	Others	Vitamin	-	3	1007900	935750	1047500	895710	852280	823770	1.15737	0.0298824	0.100384	0.85979	-0.217944	insig
pmc0066	C10H13N4O7P	2'-Deoxyinosine-5'-monophosphate	Nucleotides and derivatives	Nucleotides and derivatives	3393-18-8	3	1084100	839810	726960	3749800	3453300	4234900	1.29867	0.00180204	0.033426	4.31481	2.1093	up
pmn001518	C13H16O10	1-O-Galloyl-D-glucose	Tannins	Tannin	58511-73-2	1	282450	225050	187110	184100	184030	164460	0.931994	0.185464	0.311436	0.766747	-0.383178	insig
pmb2928	C13H16O10	Gallic acid-4-O-glucoside	Tannins	Tannin	84274-52-2	3	28311	30925	22573	39000	39264	40789	1.18073	0.0320432	0.10508	1.45526	0.541273	insig
Hmln000873	C13H16O10	2-O-Galloyl-D-glucose	Tannins	Tannin	-	2	9	9	9	94620	120910	103540	1.31535	0.00522676	0.0432191	11817.4	13.5286	up
Lmzp003497	C19H24O5	Marmin [7-(6',7'-Dihydroxygeranyloxy)coumarin]	Lignans and Coumarins	Coumarins	14957-38-1	3	6035	10270	7814.7	5990700	5630800	9227500	1.31301	0.0260856	0.0954133	864.397	9.75555	up
Hmln002806	C16H16O8	5-O-Caffeoylshikimic acid	Phenolic acids	Phenolic acids	180981-12-8	3	732940	853270	1024800	2102100	1975900	1243600	1.14045	0.0663476	0.158137	2.03814	1.02725	up
pmn001421	C16H18O8	3-O-p-Coumaroylquinic acid*	Phenolic acids	Phenolic acids	87099-71-6	2	679230	685720	814500	1627500	1629200	1073300	1.19121	0.0538077	0.141855	1.98674	0.990403	insig
Wmhn001575	C16H18O8	1,4,8-Trihydroxynaphthalene-1-O-glucoside	Quinones	Quinones	-	3	88098	111620	103990	70646	66337	65184	1.24128	0.033493	0.107972	0.665662	-0.587137	insig
pma6460	C16H18O8	4-O-p-Coumaroylquinic acid	Phenolic acids	Phenolic acids	32451-86-8	3	178950	248100	319930	621750	595920	682370	1.2351	0.00264737	0.0366959	2.54363	1.34689	up
pmb3074	C16H18O8	5-O-p-Coumaroylquinic acid*	Phenolic acids	Phenolic acids	1899-30-5	2	638340	699070	756450	1582800	1569000	1061100	1.20784	0.0494854	0.135621	2.01203	1.00865	up
pmp001223	C20H18O5	Psoralenol	Flavonoids	Isoflavones	70522-30-4	3	320950	306000	283750	246180	359300	315350	0.0103438	0.929846	0.949214	1.01112	0.015959	insig
pme3311	C6H14O12P2	D-Fructose-1,6-biphosphate	Others	Saccharides and Alcohols	488-69-7	2	56038	48161	49324	116810	122920	107480	1.30108	0.00091486	0.031021	2.26162	1.17735	up
Zmyn000083	C6H14O12P2	D-Glucose 1,6-bisphosphate	Others	Saccharides and Alcohols	10139-18-1	2	4920.7	3230.5	2663.2	19621	23449	23565	1.29173	0.00101538	0.0316052	6.16169	2.62333	up
Cmyn001328	C15H16O9	Daphnin	Lignans and Coumarins	Coumarins	486-55-5	3	676230	467590	524500	423170	309980	338300	1.09824	0.0652194	0.157279	0.642233	-0.638832	insig
Lmbn001162	C15H16O9	Esculetin-7-O-glucoside	Lignans and Coumarins	Coumarins	-	3	643040	491830	479210	403230	340740	313300	1.14181	0.0523363	0.140997	0.655029	-0.610368	insig
mws1015	C15H16O9	Esculin (6,7-DihydroxyCoumarin-6-glucoside)	Lignans and Coumarins	Coumarins	531-75-9	1	576000	435450	435430	397120	328410	267880	1.04335	0.0682203	0.160986	0.686588	-0.542484	insig
pma0149	C15H16O9	Sinapoyl malate	Phenolic acids	Phenolic acids	92344-58-6	3	18209	8036.4	16592	20792	14834	11624	0.271308	0.74101	0.801707	1.10301	0.141443	insig
pmn001420	C15H18O9	1-O-[(E)-Caffeoyl]-D-glucose	Phenolic acids	Phenolic acids	-	2	325470	318940	277210	164000	157830	114110	1.25408	0.00176406	0.033426	0.473015	-1.08004	down
Zmhn001793	C15H18O9	6-O-Caffeoyl-D-glucose	Phenolic acids	Phenolic acids	-	2	321040	264520	285600	157450	148180	100840	1.23172	0.0030368	0.0380393	0.466585	-1.09979	down
pmp000109	C19H18O6	5,7,8,4'-Tetramethoxyflavone	Flavonoids	Flavonoid	6601-66-7	1	36370	37468	41480	10755	13525	11552	1.30464	0.0005876	0.0254003	0.310723	-1.6863	down
MWSHY0118	C19H18O6	Scutellarein tetramethyl ether	Flavonoids	Flavonoid	1168-42-9	1	42512	43576	29575	67990	90109	196880	1.10758	0.181409	0.307522	3.06908	1.61781	up
mws5038	C12H22O11	Isomaltulose*	Others	Saccharides and Alcohols	13718-94-0	1	2860300	2173100	2701800	2153100	2171300	2046100	0.965178	0.155859	0.27543	0.823573	-0.280032	insig
Zmjn000425	C12H22O11	D-Lactulose	Others	Saccharides and Alcohols	4618-18-2	1	3691800	4032300	4109300	4323800	3897000	2868500	0.409856	0.62987	0.713103	0.937119	-0.0936964	insig
MA10039641	C12H22O11	Lactobiose	Others	Saccharides and Alcohols	63-42-3	1	3349700	3457600	3768400	3333400	3481500	2955600	0.746361	0.255131	0.379109	0.923863	-0.114249	insig
mws1080	C12H22O11	Galactinol	Others	Saccharides and Alcohols	3687-64-7	1	5037800	3759400	5170900	5883300	6332000	5551700	0.992587	0.0880245	0.186856	1.27197	0.347064	insig
mws1333	C12H22O11	Melibiose	Others	Saccharides and Alcohols	585-99-9	1	540440	695780	504110	480050	631310	552920	0.217047	0.748023	0.804717	0.956301	-0.0644627	insig
mws0264	C12H22O11	D-Trehalose*	Others	Saccharides and Alcohols	99-20-7	1	1495700	1208800	1207200	984530	1387300	1006100	0.662537	0.339401	0.463086	0.863545	-0.211656	insig
Lmsn000381	C12H22O11	D-Maltose*	Others	Saccharides and Alcohols	133-99-3	1	1676300	819150	1106800	1087600	1135600	815650	0.367685	0.544654	0.638676	0.843598	-0.245373	insig
pme0519	C12H22O11	D-Sucrose*	Others	Saccharides and Alcohols	57-50-1	1	2386500	1940200	2091200	2599600	2448100	2200600	0.816367	0.190304	0.314209	1.12939	0.175541	insig
mws0906	C16H22O8	Coniferin	Phenolic acids	Phenolic acids	531-29-3	1	236560	321220	209530	168120	154290	134300	1.15341	0.081282	0.177292	0.595209	-0.748531	insig
Zmhp004065	C18H16O7	7,8-Dihydroxy-5,6,4'-trimethoxyflavone	Flavonoids	Flavonoid	-	1	5155.9	3411.4	4056.7	3704.9	5737.9	2973	0.120378	0.947122	0.962301	0.983508	-0.0239919	insig
pmp000006	C18H16O7	Eupatilin (5,7-Dihydroxy-3',4',6-Trimethoxyflavone)*	Flavonoids	Flavonoid	22368-21-4	1	100540	248340	85603	60784	76809	102490	0.743648	0.337844	0.461622	0.552572	-0.855766	insig
pmp000786	C18H16O7	Eupatorin (5,3'-Dihydroxy-6,7,4'-trimethoxyflavone)*	Flavonoids	Flavonoid	855-96-9	1	59998	112630	31903	37836	37261	56676	0.511259	0.415131	0.526789	0.644269	-0.634265	insig
Lmjn005592	C18H16O7	Cirsilineol (4',5-Dihydroxy-3',6,7-trimethoxyflavone)	Flavonoids	Flavonoid	41365-32-6	1	64865	96444	33687	30506	36828	47182	0.744836	0.274066	0.393117	0.587274	-0.767895	insig
mws1474	C18H16O7	5,7-Dihydroxy-3',4',5'-trimethoxyflavone	Flavonoids	Flavonoid	18103-42-9	1	36711	33588	25506	19295	20020	22331	1.14659	0.0672436	0.159473	0.643453	-0.636094	insig
HJAP058	C19H20O6	5,6,7,4'-Tetramethoxyflavanone	Flavonoids	Flavonoid	2569-77-9	1	57877	117060	32279	27373	35348	55803	0.625682	0.361926	0.482737	0.571983	-0.805956	insig
MWSslk074	C12H24O11	Lactitol	Others	Saccharides and Alcohols	585-86-4	2	3853900	3318300	2974900	2732300	2610900	2357200	1.10874	0.0688672	0.162111	0.758877	-0.398062	insig
mws0609	C10H12N5O7P	Guanosine 3',5'-cyclic monophosphate	Nucleotides and derivatives	Nucleotides and derivatives	7665-99-8	3	743190	662710	775210	641040	617100	541600	1.07372	0.0480095	0.132339	0.825149	-0.277274	insig
pmp000010	C17H14O8	5,7,4',5'-Tetrahydro-3',6-dimethoxyflavone	Flavonoids	Flavonoid	-	1	3108.7	9449.4	2725.1	9	9	9	1.30616	0.144904	0.262484	0.00176665	-9.14477	down
Lmsp009245	C18H18O7	3',5-Dihydroxy-4',6,7-Trimethoxyflavanone	Flavonoids	Dihydroflavone	-	2	10448	5408.7	7417.9	15350	14607	10251	1.02489	0.0597789	0.149999	1.72755	0.788726	insig
Lmyp003381	C15H22O9	3,4,5-Trimethoxyphenyl-1-O-β-D-glucopyranoside	Phenolic acids	Phenolic acids	-	2	292420	297870	322540	316250	335560	330400	0.954237	0.114896	0.222538	1.07601	0.105685	insig
pmb0981	C10H14N5O7P	Adenosine 5'-monophosphate	Nucleotides and derivatives	Nucleotides and derivatives	61-19-8	1	595770	337940	260080	1512000	1638100	1932500	1.25196	0.00151701	0.0330542	4.25753	2.09002	up
mws0874	C10H14N5O7P	3'-Adenylic Acid	Nucleotides and derivatives	Nucleotides and derivatives	84-21-9	1	9	9	9	23250	18363	21436	1.31533	0.00457799	0.0431056	2335.15	11.1893	up
pmb0808	C16H16O9	Esculetin-6-O-quinic acid	Lignans and Coumarins	Coumarins	-	3	85132	93015	76450	89361	111170	98407	0.900369	0.141125	0.259593	1.17416	0.231631	insig
Lmhp011388	C21H36O4	2-α-Linolenoyl-glycerol	Lipids	Glycerol ester	55268-58-1	2	1466100	997080	1288300	502630	1344900	541710	0.830934	0.237175	0.364384	0.636879	-0.650908	insig
Lmhp011562	C21H36O4	1-α-Linolenoyl-glycerol	Lipids	Glycerol ester	-	2	821090	424480	476670	203290	164770	124070	1.21886	0.0765026	0.170063	0.28575	-1.80717	down
mws2108	C16H18O9	Cryptochlorogenic acid (4-O-Caffeoylquinic acid)	Phenolic acids	Phenolic acids	905-99-7	3	56538	52384	74753	118920	110740	116520	1.24479	0.00923621	0.0555926	1.88474	0.914367	insig
mws1077	C16H18O9	Scopoletin-7-O-glucoside (Scopolin)	Lignans and Coumarins	Coumarins	531-44-2	1	14220000	14006000	11653000	13168000	11734000	14577000	0.0578407	0.914162	0.935811	0.98997	-0.0145438	insig
mws1727	C21H22O5	Notopterol	Lignans and Coumarins	Coumarins	88206-46-6	2	6205.1	6517	8199.5	7159.3	6457.2	7272.3	0.0303008	0.988123	0.989163	0.998432	-0.00226357	insig
Lmhp112042	C21H38O4	1-Linoleoylglycerol	Lipids	Glycerol ester	2277-28-3	3	277410	180480	196250	119380	97839	82851	1.20521	0.0464742	0.130235	0.458724	-1.1243	down
Lmhp012042	C21H38O4	2-Linoleoylglycerol	Lipids	Glycerol ester	3443-82-1	3	374480	299380	387160	225390	639500	318240	0.0388187	0.778961	0.83334	1.11509	0.157157	insig
Zmnn011234	C20H21NO5	Buntanine	Alkaloids	Alkaloids	119116-85-7	1	26819000	33205000	30245000	9861100	7956500	10590000	1.2939	0.00304783	0.0380393	0.314699	-1.66795	down
Zmhn002422	C16H20O9	1-O-Feruloyl-D-Glucose	Phenolic acids	Phenolic acids	-	1	133200	111940	88700	75512	92433	54647	0.967905	0.094575	0.195524	0.666763	-0.584755	insig
Hmmn002544	C16H20O9	Ferulic acid-4-O-glucoside	Phenolic acids	Phenolic acids	117405-51-3	2	223010	190640	202230	39934	35184	37106	1.31172	0.00268169	0.0366959	0.182217	-2.45627	down
Zmhn002334	C16H20O9	6-O-Feruloyl-D-glucose	Phenolic acids	Phenolic acids	137887-25-3	3	49451	63627	61168	9	9	9	1.31559	0.00562383	0.0434224	0.000154953	-12.6559	down
Hmhn003518	C16H20O9	4-O-β-D-glucopyranosylferulic acid	Phenolic acids	Phenolic acids	-	3	287940	449390	406160	100750	123490	89374	1.27982	0.0250847	0.0944025	0.27426	-1.86638	down
pmb0296	C21H40O4	1-Oleoyl-Sn-Glycerol	Lipids	Glycerol ester	129784-87-8	3	707590	973730	2487900	113070	647840	268320	1.00673	0.193177	0.317569	0.246864	-2.01821	down
Lmsp010393	C19H18O7	Eupatorin-5-methylether (3'-hydroxy-5,6,7,4'-tetramethoxyflavone)	Flavonoids	Flavonoid	21764-09-0	1	58528	95613	33006	30540	44805	56017	0.49685	0.421549	0.526789	0.701919	-0.510624	insig
pmp000008	C19H18O7	5-Hydroxy-6,7,3',4'-tetramethoxyflavone	Flavonoids	Flavonoid	21763-80-4	1	74111	107320	48347	47132	49050	67636	0.657163	0.327912	0.449992	0.71294	-0.488147	insig
pmp000110	C19H18O7	7-Hydroxy-3,5,6,8-tetramethoxyflavone	Flavonoids	Flavonoid	-	1	5643.1	1892	2428.2	1780	6408.7	4736.2	0.323874	0.611158	0.697733	1.29725	0.375458	insig
mws1526	C16H22O9	Sweroside	Terpenoids	Sesquiterpenoids	14215-86-2	1	45747	49407	66458	1034200	1160500	1315300	1.31095	0.00504354	0.0432191	21.7187	4.44086	up
pme0085	C18H16O8	Rosmarinic acid	Phenolic acids	Phenolic acids	537-15-5	3	54951	43940	16101	901290	17888	144940	0.653949	0.369946	0.490682	9.25384	3.21005	insig
pmb3107	C15H20O10	Glucosyringic Acid	Phenolic acids	Phenolic acids	-	3	431750	540660	542700	416160	457150	477780	0.71722	0.275652	0.394203	0.891744	-0.165299	insig
pmb0998	C10H14N5O8P	Guanosine 5'-monophosphate	Nucleotides and derivatives	Nucleotides and derivatives	85-32-5	3	64100	38896	20458	132530	177650	249670	1.19521	0.037968	0.116944	4.53489	2.18107	up
mws5040	C12H21O11Na	Turanose	Others	Saccharides and Alcohols	547-25-1	3	2322300	3357000	2339100	2479300	2046000	2011100	0.765641	0.28561	0.406002	0.815175	-0.294818	insig
pma0104	C20H16O7	N-Sinapoylhydroxycoumarin	Lignans and Coumarins	Coumarins	-	3	578740	926650	989370	309370	394420	377320	1.20235	0.0609654	0.150273	0.433352	-1.20639	down
pmb0752	C17H20O9	3-O-Feruloylquinic acid	Phenolic acids	Phenolic acids	1899-29-2	1	62797	67461	70885	155820	178520	127710	1.27068	0.0249733	0.0944025	2.29712	1.19983	up
Hmhn004708	C17H20O9	Cnidioside A	Lignans and Coumarins	Coumarins	141896-53-9	3	29220	61390	35535	44831	28030	37396	0.262733	0.663291	0.741233	0.87405	-0.194213	insig
mws0179	C17H20O9	Chlorogenic acid methyl ester	Phenolic acids	Phenolic acids	29708-87-0	2	14568	11145	11464	26442	29520	11836	0.862841	0.198492	0.324899	1.82365	0.866832	insig
Lmbp002309	C17H22O9	Sinapaldehyde-4-O-Glucoside	Phenolic acids	Phenolic acids	154461-65-1	3	18784	39056	16203	58452	49234	49259	1.08504	0.0459535	0.129295	2.11965	1.08382	up
Wmkn003942	C21H22O6	2'-HydroxyIsoxanthohumol	Flavonoids	Flavonols	-	3	21293	9	5540.4	26110	19390	11834	0.684471	0.262666	0.38425	2.13595	1.09488	insig
mws0055	C20H20O7	Tangeretin (4',5,6,7,8-Pentamethoxyflavone)	Flavonoids	Flavonols	481-53-8	1	15197	11012	11950	12367	13516	17892	0.568665	0.428098	0.532184	1.14717	0.198084	insig
mws1313	C20H20O7	Sinensetin (5,6,7,3',4'-pentamethoxyflavone)	Flavonoids	Flavonoid	2306-27-6	1	3761.1	5906.2	4901	8367	8650.4	18989	1.08177	0.174078	0.299363	2.47156	1.30542	up
Zmsp007375	C20H20O7	3,5,7,3′4′-Pentamethoxyflavone	Flavonoids	Flavonoid	1247-97-8	2	3173.7	4675.8	2732.9	4668.2	4695.6	8074.8	0.94421	0.170667	0.295636	1.64789	0.720617	insig
Lmcp007155	C20H20O7	3',4',5',5,7-Pentamethoxyflavone	Flavonoids	Flavonoid	53350-26-8	1	12466	10799	4808	12711	16578	29144	0.931491	0.167076	0.290429	2.08147	1.0576	insig
Zmjp009119	C19H18O8	5,4′-Dihydroxy-3,6,7,3′-tetramethoxyflavone	Flavonoids	Flavonoid	130252-52-7	2	34988	16817	15551	19800	28771	44715	0.599128	0.420661	0.526789	1.38497	0.469854	insig
Lmjp003722	C20H22O7	2'-Hydroxy-3,4,5,4',6'-pentamethoxychalcone	Flavonoids	Chalcones	-	1	175490	131300	138100	132360	135890	154690	0.259393	0.667344	0.744014	0.950662	-0.0729957	insig
Lmsp009394	C20H22O7	3',4',5,6,7-Pentamethoxyflavanone	Flavonoids	Dihydroflavone	-	2	13144	10457	9049.9	14289	9072.4	10693	0.141662	0.823219	0.868566	1.04299	0.0607185	insig
Hmxp007703	C20H22O7	5,7,8,3’,4’-Pentamethoxyflavanone	Flavonoids	Flavonoid	-	1	26725	24846	23783	25127	30802	19730	0.0688713	0.977972	0.982102	1.00405	0.00582761	insig
mws0232	C17H20N4O6	Riboflavin (Vitamin B2)	Others	Vitamin	83-88-5	1	532980	622690	658140	314840	291040	237980	1.27586	0.00361274	0.0413942	0.465242	-1.10395	down
pme3337	C14H17N5O8	Succinyladenosine	Nucleotides and derivatives	Nucleotides and derivatives	4542-23-8	1	1674700	2062000	2381000	2111100	2625000	2120700	0.552412	0.407649	0.522583	1.12081	0.164546	insig
Lmbp003208	C17H20O10	Fraxidin-8-O-glucoside	Lignans and Coumarins	Coumarins	-	2	140130	211890	255920	242330	125760	134700	0.47761	0.525566	0.621658	0.827039	-0.273973	insig
pme1286	C14H20N6O5S	S-(5'-Adenosy)-L-homocysteine	Amino acids and derivatives	Amino acids and derivatives	979-92-0	1	288510	162690	227760	114900	151380	103190	1.08621	0.0896189	0.188557	0.54417	-0.877869	insig
Zmhn002227	C17H22O10	4-O-Glucosyl-sinapate	Phenolic acids	Phenolic acids	-	2	371600	343370	364480	154660	138020	130490	1.30757	4.8179e-05	0.00951945	0.392024	-1.35099	down
pmb2940	C17H22O10	1-O-Glucosyl sinapate	Phenolic acids	Phenolic acids	78185-48-5	3	1569500	4276200	3819100	2176600	1726400	1357600	0.826516	0.215947	0.342848	0.544305	-0.877513	insig
HJN003	C17H22O10	1-O-Sinapoyl-D-glucose	Phenolic acids	Phenolic acids	-	2	209660	435320	465860	204900	198840	166130	1.00974	0.152548	0.272694	0.513008	-0.962946	insig
pmn001423	C19H30O8	Roseoside	Others	Others	54835-70-0	2	196030	466000	418920	84300	100400	56352	1.21353	0.0749316	0.167671	0.223	-2.16488	down
pmb0292	C27H46O	Cholesterol	Steroids	Steroid	57-88-5	3	195380	144210	94716	76677	61301	89598	1.03204	0.132536	0.247772	0.523999	-0.932363	insig
pmp001161	C20H20O8	5-Hydroxyauranetin	Flavonoids	Flavonols	50439-46-8	1	7060.2	3465.9	3005.6	4241.7	2678.1	6630.8	0.0364564	0.997257	0.997257	1.0014	0.00201364	insig
Lmcp007265	C20H20O8	3'-Demethylnobiletin	Flavonoids	Flavonoid	112448-39-2	1	3886	1415.7	1817.3	9	5090.7	7817.1	0.305599	0.493618	0.590301	1.81441	0.859502	insig
Jmbp006554	C20H20O8	ethyl rosmarinate	Others	Others	-	1	26737	19098	14544	20697	29022	35213	0.801227	0.213404	0.340923	1.40665	0.492261	insig
MWSHY0101	C20H20O8	5-Hydroxy-6,7,8,3',4'-pentamethoxyflavone	Flavonoids	Flavonoid	2174-59-6	1	34824	19135	18084	20549	23850	34968	0.310848	0.743929	0.803038	1.10166	0.139681	insig
Lmzn001582	C18H28O9	5'-Glucosyloxyjasmanic acid	Phenolic acids	Phenolic acids	-	3	57357	50562	37642	61409	64131	46273	0.609867	0.336531	0.460491	1.18035	0.239215	insig
Zmjp003597	C19H32O8	Ampelopsisionoside	Others	Others	-	2	9	9	9	433310	1067800	764700	1.31432	0.0541189	0.141855	83918.9	16.3567	up
Lmwp011196	C24H38O4	Bis(2-ethylhexyl)phthalate	Phenolic acids	Phenolic acids	117-81-7	2	36413000	26803000	63671000	52376000	22927000	33937000	0.261521	0.696988	0.76806	0.860923	-0.216043	insig
Lmmp010562	C24H38O4	Diisooctyl Phthalate	Phenolic acids	Phenolic acids	27554-26-3	2	35445000	25566000	58022000	48335000	22103000	33089000	0.259632	0.695886	0.767735	0.869734	-0.201355	insig
pme2735	C15H22N6O5S	S-Adenosyl-L-methionine	Amino acids and derivatives	Amino acids and derivatives	29908-03-0	3	1901900	1552400	1352400	891980	879370	554100	1.18111	0.0170362	0.0796402	0.483793	-1.04754	down
pmc0281	C15H21N5O8	Ribosyladenosine	Nucleotides and derivatives	Nucleotides and derivatives	-	3	1185300	3194400	3366200	1654900	1743100	1141100	0.710549	0.263166	0.38425	0.586	-0.771027	insig
Lmhn002573	C17H20O11	Sinapoylglucuronic acid	Phenolic acids	Phenolic acids	-	2	743950	1053400	967690	456180	420050	361040	1.26262	0.0235746	0.092442	0.447469	-1.16014	down
MWSHY0018	C21H22O8	Nobiletin (5,6,7,8,3',4'-Hexamethoxyflavone)	Flavonoids	Flavonoid	478-01-3	1	9	9	9	3400.2	4005.8	5644.2	1.31496	0.0230198	0.0908376	483.341	8.9169	up
Hmln003529	C18H26O10	Benzyl β-primeveroside	Others	Others	130622-31-0	3	9306.6	12636	11496	27084	29078	27063	1.28558	0.000317175	0.0188521	2.48889	1.3155	up
Cmjn004337	C18H26O10	Benzyl-(2''-O-xylosyl)glucoside	Phenolic acids	Phenolic acids	-	3	9	9	9	14270	17933	18728	1.31551	0.00648226	0.0457522	1886.33	10.8814	up
pme3007	C9H14N2O12P2	Uridine 5'-diphosphate	Nucleotides and derivatives	Nucleotides and derivatives	27821-45-0	3	52448	40258	36418	63338	67392	58862	1.13873	0.034406	0.109472	1.46829	0.554141	insig
pmp001054	C17H24O11	Gardenoside	Terpenoids	Sesquiterpenoids	24512-62-7	3	49949	81953	93299	9	9	9	1.31495	0.0286239	0.0982771	0.000119893	-13.026	down
pmp000114	C21H24O8	5,6,7,8,3',4'-Hexamethoxyflavanone	Flavonoids	Dihydroflavone	-	1	7681.1	6706.7	8389.1	9	9	9	1.31516	0.00411047	0.0415691	0.00118541	-9.7204	down
Cmyp005062	C20H22O9	Salireposide	Phenolic acids	Phenolic acids	16955-55-8	3	792490	930790	822150	6145200	6197500	7909900	1.31092	0.0092272	0.0555926	7.95646	2.99213	up
Zmsn001980	C21H28O8	Ixerisoside D	Terpenoids	Sesquiterpenoids	-	3	1360900	935470	742200	1208700	832280	401360	0.482688	0.541096	0.636859	0.803779	-0.315128	insig
Hmhp002580	C19H24O10	Methylpicraquassioside A	Lignans and Coumarins	Coumarins	-	1	15434	6714.2	19579	30476	31948	38203	1.09286	0.0172794	0.0801595	2.41154	1.26996	up
pmn001319	C22H22O8	1-O-Feruloyl-3-O-p-Coumaroylglycerol	Phenolic acids	Phenolic acids	-	3	9	4115.1	3963.9	169320	116330	73415	1.03473	0.0515614	0.139807	44.3948	5.47232	up
pmf0070	C29H50O	β-Sitosterol	Steroids	Steroid	83-46-5	2	1147000	1344900	5012000	1000900	624500	850050	0.89232	0.313573	0.435977	0.329888	-1.59995	insig
pmb0580	C21H20O9	Chrysin-5-O-glucoside (Toringin)	Flavonoids	Flavonoid	1329-10-8	3	24744	17489	18212	9	9	9	1.31453	0.0128726	0.0654643	0.000446687	-11.1284	down
pmn001551	C21H22O9	Natsudaidain (3-Hydroxy-3',4',5,6,7,8-hexamethoxyflavone)	Flavonoids	Flavonols	35154-55-3	1	22414	14560	13119	8608.4	6474.3	6870.3	1.19094	0.0765374	0.170063	0.438245	-1.19019	down
Lmyp004617	C21H22O9	Pinocembrin-7-O-glucoside (Pinocembroside)	Flavonoids	Flavonoid	75829-43-5	3	4288000	3394200	3151200	2007800	1755900	1525900	1.24537	0.0213021	0.086574	0.488268	-1.03426	down
Hmcn002743	C22H26O8	Lirioresinol A	Lignans and Coumarins	Lignans	21453-71-4	3	232640	434590	490400	804480	700830	679990	1.07029	0.0310004	0.102531	1.88774	0.916657	insig
pmn001663	C22H26O8	Syringaresinol	Lignans and Coumarins	Lignans	21453-69-0	3	40229	82704	86358	146720	133530	128950	1.07167	0.0340734	0.109472	1.95517	0.967296	insig
mws2523	C12H23O14P	Trehalose 6-phosphate	Others	Saccharides and Alcohols	4484-88-2	3	44299	36255	27975	55089	70178	57613	1.14567	0.0201759	0.0837874	1.68508	0.752817	insig
pmp001033	C19H18O11	Isomangiferin	Others	Xanthone	24699-16-9	3	323680	149340	208210	498310	483730	377010	1.10343	0.0273926	0.096483	1.99499	0.996385	insig
pmb0864	C19H40NO7P	LysoPE 14:0	Lipids	LPE	-	3	112350	90099	85027	54360	38083	49006	1.22556	0.0131043	0.0661293	0.492038	-1.02316	down
Lmhp008337	C19H40NO7P	LysoPE 14:0(2n isomer)	Lipids	LPE	-	3	19168	18971	31849	28670	217880	87014	0.954083	0.256449	0.379734	4.76602	2.25278	insig
pme2117	C10H15N5O10P2	Adenosine 5'-diphosphate	Nucleotides and derivatives	Nucleotides and derivatives	58-64-0	3	147990	143650	81272	125990	166670	155690	0.595681	0.380964	0.498345	1.20229	0.26579	insig
pmp000413	C21H20O10	Genistein-8-C-glucoside	Flavonoids	Isoflavones	66026-80-0	1	36176	17420	12222	18008	20438	13822	0.256228	0.602715	0.691414	0.794129	-0.332554	insig
MWS20149	C21H20O10	Apigenin-7-O-α-D-glucopyranoside	Flavonoids	Flavonoid	-	2	34521	36531	43441	33901	30344	23865	0.977415	0.0927625	0.193035	0.769567	-0.377882	insig
mws0048	C21H20O10	Apigenin-8-C-Glucoside (Vitexin)*	Flavonoids	Flavonoid carbonoside	3681-93-4	1	20710	37604	6217.2	19758	10053	5659	0.477553	0.407733	0.522583	0.549657	-0.863398	insig
MWSHY0008	C21H20O10	Isovitexin	Flavonoids	Flavonoid	38953-85-4	1	21676	13061	17318	21242	15350	31375	0.593774	0.389637	0.506209	1.30568	0.384798	insig
MWS20148	C21H20O10	Apigenin-3'-O-α-D-glucopyranoside	Flavonoids	Flavonoid	-	2	27689	31679	40777	26413	36594	19639	0.602389	0.407414	0.522583	0.825263	-0.277073	insig
Lmgp004731	C21H20O10	Genistein-7-O-galactoside	Flavonoids	Isoflavones	-	1	17692	44903	45817	35498	20963	19439	0.527912	0.377197	0.49731	0.700107	-0.514353	insig
mws1434	C21H20O10	Apigenin-6-C-glucoside (Isovitexin)*	Flavonoids	Flavonoid carbonoside	29702-25-8	1	21306	9568.2	11876	15821	10770	13280	0.0420054	0.822365	0.868566	0.932651	-0.100591	insig
pmp000117	C22H24O9	3,5,6,7,8,3',4'-Heptamethoxyflavone	Flavonoids	Flavonols	1178-24-1	1	8492.3	8373.3	8174	6486.5	8923.4	12726	0.280564	0.627182	0.710906	1.12366	0.168201	insig
pme1611	C21H22O10	Isohemiphloin	Flavonoids	Flavonoid carbonoside	650903	1	9855	17585	18808	7177.2	19777	11546	0.408743	0.609258	0.6964	0.832473	-0.264525	insig
Lmhp008440	C20H40NO7P	LysoPE 15:1	Lipids	LPE	-	3	10810	12167	16227	62327	577840	210840	1.18638	0.219381	0.344309	21.7071	4.4401	up
Lmhp008273	C20H40NO7P	LysoPE 15:1(2n isomer)	Lipids	LPE	-	3	11917	11543	10751	63874	543460	223840	1.20793	0.200191	0.326618	24.2955	4.60262	up
Lmhp009187	C20H42NO7P	LysoPE 15:0	Lipids	LPE	-	3	365070	284450	297340	137110	58461	96738	1.21018	0.00305213	0.0380393	0.308714	-1.69566	down
Lmhp008885	C20H42NO7P	LysoPE 15:0(2n isomer)	Lipids	LPE	-	3	66580	77319	132420	200980	952910	475920	1.12396	0.175335	0.300438	5.89829	2.5603	up
Lmqp012453	C30H48O2	Ursolaldehyde	Terpenoids	Triterpene	-	3	146180	152430	137520	305460	301990	309550	1.31121	6.74309e-05	0.00951945	2.10258	1.07216	up
mad2116	C22H18O10	Bis(p-Coumaroyl)tartaric acid	Phenolic acids	Phenolic acids	-	3	7498	8785	13875	9	9	9	1.31411	0.0355834	0.111746	0.000895285	-10.1254	down
Lmhn004960	C22H18O10	7-O-Galloyltricetiflavan	Flavonoids	Flavanols	-	2	4708	15017	25797	15107	32972	5533.2	0.10298	0.803313	0.854531	1.17772	0.235997	insig
pmn001338	C21H18O11	Rhein-8-O-glucoside	Quinones	Anthraquinone	34298-86-7	3	3342200	3082400	3350500	4190100	4629600	4218000	1.26254	0.00527173	0.0432191	1.33377	0.415506	insig
mws0894	C22H22O10	Glycitin	Flavonoids	Isoflavones	40246-10-4	3	102330	89726	110790	154800	199420	157340	1.22356	0.0267086	0.0961799	1.68918	0.756319	insig
pmp000550	C22H22O10	Calycosin-7-O-glucoside	Flavonoids	Isoflavones	20633-67-4	3	90179	233260	256510	409000	445290	446770	1.04868	0.0376592	0.116658	2.2434	1.16569	up
Lmlp001118	C23H29NO8	3'-Glucosyl-6,7-dihydroxy-N-methyl-benzyltetrahydroisoquinoline	Alkaloids	Alkaloids	-	2	72248	107780	127070	201640	199900	221130	1.18827	0.0123169	0.0643591	2.02759	1.01977	up
Hmcp002316	C21H20O11	Isorhamnetin-3-O-arabinoside	Flavonoids	Flavonols	-	3	10094	20067	8144.5	20616	5534.5	9498.8	0.202579	0.88695	0.916836	0.930657	-0.103678	insig
mws1608	C21H20O11	Luteolin-6-C-glucoside (Isoorientin)	Flavonoids	Flavonoid carbonoside	4261-42-1	1	10528	4742.2	9495	4154.5	11082	4711	0.407265	0.604324	0.692424	0.805465	-0.312106	insig
Zmhn001905	C21H20O11	HydroxyAloe-emodin-8-O-glucoside	Quinones	Anthraquinone	-	2	83929	78788	79480	100340	117710	109060	1.24988	0.0216471	0.0876015	1.35059	0.433595	insig
mws0089	C21H20O11	Kaempferol-7-O-glucoside*	Flavonoids	Flavonols	16290-07-6	2	7448	19506	19091	9	9	9	1.31199	0.0604233	0.150033	0.000586383	-10.7359	down
mws0045	C21H20O11	Quercetin-3-O-rhamnoside(Quercitrin)	Flavonoids	Flavonols	522-12-3	1	11919	9136.5	5698.5	11972	12756	11319	0.815402	0.223322	0.349308	1.34735	0.430125	insig
Hmpp003270	C21H20O11	Luteolin-4'-O-glucoside	Flavonoids	Flavonoid	6920-38-3	3	26847	13572	28095	32738	17200	68172	0.584325	0.389585	0.506209	1.72388	0.78566	insig
mws2209	C21H20O11	Kaempferol-3-O-glucoside (Astragalin)*	Flavonoids	Flavonols	480-10-4	3	14486	24442	24836	26531	23298	72905	0.747744	0.344287	0.466406	1.92482	0.944721	insig
MWS20150	C21H20O11	luteolin-7-O-β-D-glucopyranoside	Flavonoids	Flavonoid	-	2	20797	52692	82516	74597	33511	45342	0.0912668	0.970673	0.979798	0.983622	-0.0238236	insig
Xmyp005654	C21H20O11	Kaempferol-4'-O-glucoside	Flavonoids	Flavonoid	-	1	7508.5	37675	62145	93392	38729	43878	0.599205	0.386099	0.504368	1.63982	0.713534	insig
Lmlp003531	C21H20O11	Luteolin-3'-O-glucoside	Flavonoids	Flavonoid	5154-41-6	1	20892	23696	26640	9	9	9	1.31552	0.00485331	0.0432191	0.000379064	-11.3653	down
mws1299	C21H20O11	Luteolin-8-C-glucoside (Orientin)	Flavonoids	Flavonoid carbonoside	28608-75-5	1	1490.5	5978	5152	8060.8	9779.2	1872.8	0.335863	0.452513	0.555994	1.56197	0.643364	insig
mws0913	C21H20O11	Kaempferol-3-O-galactoside (Trifolin)	Flavonoids	Flavonols	23627-87-4	2	68172	74439	87631	134690	97986	128540	1.15057	0.042325	0.122414	1.56885	0.649711	insig
pmb3023	C21H22O11	Eriodictyol-8-C-glucoside	Flavonoids	Dihydroflavone	1023271-51-3	3	16001	12824	14504	20931	19398	17829	1.16113	0.0182419	0.081063	1.34224	0.424645	insig
mws1361	C21H22O11	Taxifolin-3-O-rhamnoside (Astilbin)	Flavonoids	Dihydroflavonol	29838-67-3	3	9	9	9	11160	7524.5	4083.5	1.30871	0.0655773	0.157279	843.259	9.71983	up
Lmhp008763	C21H42NO7P	LysoPE 16:1(2n isomer)	Lipids	LPE	-	3	352100	433060	560160	3407000	26047000	12490000	1.22821	0.175915	0.30089	31.1777	4.96244	up
Lmhp009034	C21H42NO7P	LysoPE 16:1	Lipids	LPE	-	3	51308	61790	64670	3219200	3730500	4500400	1.31375	0.00967142	0.0564111	64.4104	6.00922	up
MWSmce417	C22H28O10	5-O-Methylvisammioside	Others	Others	84272-85-5	2	9	9	9	59349	57361	55078	1.3154	0.000464151	0.0245226	6362.52	12.6354	up
pmb0876	C21H44NO7P	LysoPE 16:0	Lipids	LPE	53862-35-4	1	34331000	30899000	28779000	20143000	19688000	17194000	1.26663	0.00590532	0.0442202	0.606591	-0.721204	insig
pmd0160	C21H44NO7P	LysoPE 16:0(2n isomer)	Lipids	LPE	-	1	1249300	1013600	1594000	1596500	12960000	6066800	0.977307	0.232682	0.359807	5.34712	2.41876	insig
pmp001093	C26H30O7	1,2-Dihydroobacunone	Terpenoids	Triterpene	-	2	719310	679530	696250	498750	617890	461950	1.12831	0.059937	0.15	0.753471	-0.408376	insig
pmp000528	C26H30O7	Obacunone	Terpenoids	Triterpene	751-03-1	2	2323800	2126200	2438000	1496900	1575600	1430100	1.28284	0.00524225	0.0432191	0.653688	-0.613327	insig
MWS5083	C17H21N4O9P	Flavin Single Nucleotide(FMN)	Nucleotides and derivatives	Nucleotides and derivatives	6184-17-4	2	143540	129160	88639	293030	260890	207120	1.1872	0.0156673	0.0748723	2.10617	1.07462	up
mws4053	C30H48O3	Ursolic acid	Terpenoids	Triterpene	77-52-1	2	17994	30588	33581	26951	8130.6	8215.3	0.880436	0.180156	0.30649	0.526963	-0.924225	insig
MWSmce052	C30H48O3	3-Epiursolic acid	Terpenoids	Triterpene	989-30-0	3	17467	29916	28046	25762	8117.8	8500.5	0.864782	0.200584	0.326618	0.561857	-0.831725	insig
Lmmn008971	C30H48O3	Isomangiferolic acid	Terpenoids	Triterpene	13878-92-7	2	19999	27109	28693	24199	9046.4	9239.9	0.937145	0.144343	0.262466	0.560485	-0.835253	insig
Lmmn009170	C30H48O3	Mangiferolic acid	Terpenoids	Triterpene	4184-34-3	2	179660	265900	278750	234260	189700	164260	0.678507	0.299653	0.420931	0.812111	-0.300251	insig
HJN110	C30H48O3	Betulinic acid	Terpenoids	Triterpene	472-15-1	3	196860	307610	276550	241400	169290	151670	0.870447	0.166979	0.290429	0.720033	-0.473866	insig
pmn001700	C30H48O3	24,30-Dihydroxy-12(13)-enolupinol	Terpenoids	Triterpene	-	3	193570	258300	247960	206930	171190	145490	0.980375	0.094817	0.195599	0.748196	-0.418512	insig
Zmjn014062	C30H48O3	(23S)-3β-hydroxydammara-21-oic acid 21,23-lactone	Terpenoids	Triterpene	-	2	164280	248350	231310	206390	158550	134390	0.783016	0.223288	0.349308	0.775429	-0.366933	insig
pmb0464	C16H27NO14	L-Aspartic acid-O-diglucoside	Amino acids and derivatives	Amino acids and derivatives	-	2	2300800	2276100	2401900	933400	1323500	982360	1.26759	0.0056618	0.0434224	0.464157	-1.10731	down
mws2220	C22H18O11	Gallocatechin 3-O-gallate	Flavonoids	Flavanols	5127-64-0	3	44996	68366	25990	69982	113520	58259	0.84557	0.18278	0.309295	1.73489	0.794848	insig
mws0034	C22H18O11	Epigallocatechin-3-gallate	Flavonoids	Flavanols	989-51-5	3	39216	45323	23154	45795	117590	48752	0.843474	0.273103	0.392378	1.96983	0.978072	insig
pmb2654	C19H27NO12	Anthranilate-1-O-Sophoroside	Phenolic acids	Phenolic acids	-	2	254110	201800	208210	137050	147960	95375	1.16291	0.0146865	0.0718774	0.572765	-0.803984	insig
Lmzn001894	C21H18O12	Kaempferol-3-O-glucuronide	Flavonoids	Flavonols	22688-78-4	3	24661	39794	53758	230050	35490	63588	0.698683	0.366333	0.487248	2.78419	1.47726	insig
pmn001702	C21H18O12	Tetahydroxyflavone-7-O-glucuronide	Flavonoids	Flavonoid	-	3	22517	36551	26009	189300	40656	67199	0.97347	0.261878	0.383965	3.49278	1.80437	insig
mws4167	C21H18O12	Luteolin-7-O-glucuronide	Flavonoids	Flavonoid	29741-10-4	3	38376	62190	63916	302400	34210	94738	0.559558	0.387655	0.505706	2.62246	1.39092	insig
pmp000012	C21H18O12	Scutellarein-7-O-glucuronide (Scutellarin)	Flavonoids	Flavonoid	27740-01-8	3	38386	58403	51770	310400	37846	77128	0.620096	0.391389	0.507792	2.86333	1.5177	insig
pmp000579	C22H22O11	Diosmetin-7-O-galactoside*	Flavonoids	Flavonoid	-	2	58703	105450	83275	188940	35838	58640	0.120964	0.828509	0.871585	1.14546	0.195923	insig
Lmjp003655	C22H22O11	6-C-MethylKaempferol-3-glucoside	Flavonoids	Flavonoid	-	2	49717	101710	97493	177300	9	60534	0.537901	0.951328	0.964513	0.9555	-0.0656726	insig
Lmpn006208	C22H22O11	8-Methoxykaempferol-7-O-rhamnoside	Flavonoids	Flavonols	-	3	33250	37615	41159	15092	18305	17513	1.28664	0.00559199	0.0434224	0.454456	-1.13779	down
mws0061	C21H20O12	Quercetin-3-O-galactoside (Hyperin)	Flavonoids	Flavonols	482-36-0	1	21497	11671	20728	19052	28034	22932	0.709575	0.261404	0.383965	1.29913	0.377548	insig
mws0091	C21H20O12	Quercetin-3-O-glucoside (Isoquercitrin)	Flavonoids	Flavonols	482-35-9	1	26140	19197	26068	19199	18348	28745	0.288014	0.698119	0.768416	0.928394	-0.10719	insig
pmp001309	C21H20O12	6-Hydroxykaempferol-7-O-glucoside	Flavonoids	Flavonols	-	1	26024	42758	35514	55794	16260	23482	0.345168	0.83965	0.878397	0.916008	-0.126567	insig
Lmzp002365	C22H24O11	Hesperetin-7-O-glucoside	Flavonoids	Flavonoid	31712-49-9	1	2081.2	3432.5	2086.5	9	2848	7022.8	0.423909	0.747791	0.804717	1.29994	0.378444	insig
Lmhp009464	C22H44NO7P	LysoPE 17:1(2n isomer)	Lipids	LPE	-	3	468600	555650	725530	512980	4839100	1772800	0.818689	0.297642	0.418725	4.07187	2.02569	insig
pmd0130	C22H46NO7P	LysoPC 14:0	Lipids	LPC	20559-16-4	1	220990	265940	301190	725050	4105600	2481300	1.16938	0.155668	0.27543	9.27771	3.21377	up
Lmhp010162	C22H46NO7P	LysoPE 17:0	Lipids	LPE	-	2	165840	159110	229740	177650	759140	472740	0.875754	0.230196	0.356542	2.54111	1.34546	insig
pme3544	C26H30O8	Limonin	Terpenoids	Triterpene	1180-71-8	1	13602000	12817000	14253000	7676900	8205200	8095800	1.30164	0.00220177	0.0337723	0.589543	-0.762331	insig
Lmzp003694	C26H32O8	Obacunoic acid	Terpenoids	Triterpene	751-29-1	1	754160	463890	583470	741330	811130	699570	0.842768	0.209281	0.336763	1.25007	0.322011	insig
Cmpp004617	C26H32O8	Deacetylnomilin	Lignans and Coumarins	Coumarins	3264-90-2	2	1264800	1077300	1112000	629970	624390	494500	1.27168	0.00186755	0.033426	0.506314	-0.981895	insig
Cmpp004946	C26H32O8	Isoobacunoic acid	Lignans and Coumarins	Coumarins	751-28-0	2	1190400	1184700	1060400	645800	512100	527060	1.28372	0.000621913	0.0256086	0.490456	-1.02781	down
Lmzn006284	C30H48O4	2α-Hydroxyursolic acid	Terpenoids	Triterpene	-	3	4049400	4828200	5951500	1059600	1172800	933260	1.3003	0.0182995	0.081063	0.213476	-2.22785	down
mws1610	C30H48O4	Maslinic acid	Terpenoids	Triterpene	4373-41-5	3	3474300	4345300	5090100	985580	1172800	920300	1.29675	0.0176284	0.0802134	0.238478	-2.06807	down
pmn001706	C30H48O4	2-Hydroxyoleanolic acid	Terpenoids	Triterpene	26707-60-8	3	3954100	4915900	5885300	1021200	1223700	1049600	1.29878	0.0195506	0.0827812	0.223276	-2.1631	down
pmb1912	C20H23N7O7	10-Formyltetrahydrofuran	Alkaloids	Alkaloids	2800-34-2	1	11686000	13324000	12967000	6693100	8286800	8301700	1.24739	0.00260681	0.0366959	0.613045	-0.705936	insig
pmb2962	C23H23O11+	Pelargonidin-3-O-(6''-O-acetyl)glucoside	Flavonoids	Anthocyanins	-	3	9	9	9	19416	31311	29988	1.31497	0.0190271	0.0818767	2989.44	11.5457	up
Lmtn001569	C20H29NO12	2-Glucosyl-glucosyloxy-2-phenylacetic acid amide	Alkaloids	Alkaloids	-	3	45685	48593	42084	27659	30049	40826	1.04443	0.071339	0.165069	0.722591	-0.468748	insig
Lmhp008801	C23H42NO7P	LysoPE 18:3	Lipids	LPE	-	1	2940700	2204700	2070300	638290	3947100	1762500	0.420357	0.797951	0.85073	0.879733	-0.184862	insig
Lmhp008589	C23H42NO7P	LysoPE 18:3(2n isomer)	Lipids	LPE	-	1	23900000	22892000	27845000	21014000	42751000	37269000	0.668986	0.308619	0.430979	1.35367	0.436878	insig
HJAP056	C23H24O11	Dihydroxy-dimethoxyflavone-7-O-glucoside	Flavonoids	Flavonoid	-	3	12349	40985	14148	70850	12132	31323	0.423754	0.483196	0.580935	1.69386	0.760314	insig
pmp000172	C23H24O11	5,2'-Dihydroxy-7,8-dimethoxyflavone glycosides	Flavonoids	Flavonoid	-	3	4098.7	10765	8197.3	34004	17329	30491	1.15	0.0469132	0.130244	3.54815	1.82707	up
pmb0874	C23H44NO7P	LysoPE 18:2(2n isomer)	Lipids	LPE	-	1	1234700	1459000	1877900	1775500	8236500	4512900	0.962389	0.217445	0.343211	3.1772	1.66776	insig
pmb0881	C23H44NO7P	LysoPE 18:2	Lipids	LPE	-	2	176560	137070	144980	91431	99858	76793	1.21984	0.0175413	0.0802134	0.584553	-0.774593	insig
pma0214	C22H22O12	6-C-Methylquercetin-3-O-glucoside	Flavonoids	Flavonols	-	3	40426	125430	109820	203840	79949	111230	0.511862	0.436144	0.537967	1.43291	0.518948	insig
Lmjp002906	C22H22O12	Rhamnetin-3-O-Glucoside	Flavonoids	Flavonols	27875-34-9	2	49954	124490	114090	245350	82144	134050	0.593678	0.362646	0.483021	1.59962	0.677727	insig
Lmjp003295	C22H22O12	6-Methoxykaempferol-3-O-glucoside	Flavonoids	Flavonoid	63422-27-5	3	51896	144940	129600	291360	83596	120730	0.445311	0.484359	0.581597	1.51848	0.602626	insig
Hmgp002036	C22H22O12	Nepetin-7-O-glucoside	Flavonoids	Flavonoid	569-90-4	2	59699	160680	122740	273560	82382	145100	0.448751	0.467593	0.567196	1.46026	0.546223	insig
pmb0856	C23H46NO7P	LysoPE 18:1(2n isomer)	Lipids	LPE	-	1	10037000	13687000	18296000	8390500	40971000	17893000	0.380796	0.479005	0.577355	1.60054	0.678555	insig
pmb2260	C23H46NO7P	LysoPC 15:1	Lipids	LPC	-	2	356020	349490	487740	985310	7522200	3062700	1.12671	0.214656	0.341671	9.69638	3.27745	up
mws0289	C23H46NO7P	LysoPE 18:1	Lipids	LPE	89576-29-4	3	5400500	5060700	4915900	6350500	5102400	7245200	0.881472	0.21253	0.340394	1.21597	0.282108	insig
Lmhp009129	C23H48NO7P	LysoPC 15:0(2n isomer)	Lipids	LPC	-	1	759320	929540	981090	1165500	8513300	3563000	0.985723	0.244803	0.370805	4.95957	2.31021	insig
pmb0883	C23H48NO7P	LysoPE 18:0	Lipids	LPE	69747-55-3	3	547750	499680	449530	257270	267700	224780	1.28453	0.00524785	0.0432191	0.500848	-0.997554	insig
pmb2319	C23H48NO7P	LysoPC 15:0	Lipids	LPC	108273-89-8	1	624320	699310	762740	800500	6182000	2454100	0.935992	0.263524	0.38425	4.52298	2.17727	insig
HJN104	C21H22O13	Dihydromyricetin-3-O-glucoside	Flavonoids	Dihydroflavonol	-	3	33432	21464	21320	14188	9671.3	9032.1	1.18132	0.0537622	0.141855	0.431555	-1.21238	down
pmb3066	C22H26O12	5-O-p-Coumaroylshikimic acid O-glucoside	Phenolic acids	Phenolic acids	-	3	16456	15017	15034	9	9	9	1.31534	0.00094596	0.031021	0.000580558	-10.7503	down
Hmbp002498	C21H26O13	Scopoletin-7-O-xylosyl(1→6)glucoside	Lignans and Coumarins	Coumarins	-	3	216650	230230	191150	302700	297810	189100	0.652935	0.304692	0.426749	1.23758	0.307516	insig
pmn001707	C30H46O5	Quillaic acid	Phenolic acids	Phenolic acids	631-01-6	3	8079300	7735700	8579200	5689000	6533900	6433800	1.22001	0.00627657	0.0457522	0.764801	-0.386844	insig
pmp000444	C30H46O5	27,28-Dicarboxyl ursolic acid	Terpenoids	Triterpene	-	3	128120	142770	119510	97726	96465	192740	0.152716	0.974686	0.980099	0.991114	-0.0128767	insig
pmn001527	C22H32O12	Di-O-galloyl Methyl gallate	Tannins	Tannin	-	2	581130	578610	675660	362980	325140	298000	1.28133	0.00353868	0.0413942	0.537278	-0.896259	insig
pmn001426	C30H48O5	Euscaphic acid	Terpenoids	Triterpene	53155-25-2	3	80032	113610	136530	67948	73440	83839	0.967681	0.158823	0.279706	0.682151	-0.551838	insig
Zmpn006881	C30H48O5	Tormentic acid	Terpenoids	Triterpene	13850-16-3	3	61422	101100	135650	105480	128180	111910	0.48628	0.544362	0.638676	1.15896	0.212833	insig
Lmmn003398	C23H22O12	Kaempferol-3-O-(6''-acetyl)glucoside	Flavonoids	Flavonols	-	3	141850	119760	131060	102450	82801	83315	1.20165	0.0103818	0.0577375	0.683948	-0.548041	insig
Lmzn003560	C26H34O9	Sudachinoid A	Terpenoids	Terpene	-	1	385780	337620	397780	374020	430970	426750	0.762358	0.228632	0.354697	1.09861	0.13568	insig
pmb0863	C24H46NO7P	LysoPC 16:2(2n isomer)	Lipids	LPC	-	3	327620	400110	449330	1608100	13333000	4872800	1.17908	0.217343	0.343211	16.8334	4.07325	up
pme0444	C23H25O12+	Malvidin-3-O-glucoside (Oenin)	Flavonoids	Anthocyanins	18470-06-9	2	69060	64030	65632	72046	54932	67300	0.212043	0.803157	0.854531	0.977637	-0.0326291	insig
pme0443	C23H25O12+	Malvidin-3-O-galactoside (Primulin)	Flavonoids	Anthocyanins	30113-37-2	2	239010	194580	166070	215750	240770	202210	0.531855	0.471902	0.571692	1.09851	0.135543	insig
Lmhp008833	C24H48NO7P	LysoPC 16:1(2n isomer)	Lipids	LPC	-	1	2504700	4645800	4925000	24425000	58894000	62224000	1.25926	0.0659284	0.157532	12.0528	3.59129	up
pmp001270	C24H48NO7P	LysoPC 16:1	Lipids	LPC	76790-27-7	1	90483	143340	81731	10762000	11075000	12060000	1.31148	0.0011898	0.0316052	107.421	6.74713	up
pmb0855	C24H50NO7P	LysoPC 16:0	Lipids	LPC	17364-16-8	1	19790000	20284000	16523000	12572000	10613000	8209500	1.19954	0.00835245	0.0522578	0.554703	-0.850214	insig
pmd0132	C24H50NO7P	LysoPC 16:0(2n isomer)	Lipids	LPC	-	1	603520	693360	759390	1299900	9068700	3813300	1.0861	0.219402	0.344309	6.89691	2.78595	up
Lmhp008688	C25H42NO7P	LysoPE 20:5	Lipids	LPE	-	3	9	9	9	502780	3523900	2280200	1.3101	0.138626	0.256486	233588	17.8336	up
Lmhp009497	C25H44NO7P	LysoPE 20:4	Lipids	LPE	-	3	15477	19417	15155	2894200	8942800	7224700	1.3067	0.0720319	0.166142	380.861	8.57312	up
Lmhp010040	C25H46NO7P	LysoPE 20:3	Lipids	LPE	-	3	38274	32417	49334	5744400	36338000	19415000	1.2947	0.146913	0.26461	512.372	9.00105	up
pmn001642	C23H20O13	Kaempferol-3-O-(2''-O-acetyl)glucuronide	Flavonoids	Flavonols	-	2	9	9	9	72201	92013	107830	1.31555	0.0126757	0.0651602	10075.7	13.2986	up
pme2125	C18H32O16	Raffinose*	Others	Saccharides and Alcohols	512-69-6	3	7800.9	6237.7	14749	11885	19058	10447	0.694358	0.323423	0.447058	1.43777	0.523835	insig
MWS0442	C18H32O16	Maltotriose	Others	Saccharides and Alcohols	1109-28-0	2	24004	21320	26865	23871	20156	22295	0.584348	0.375567	0.496751	0.918727	-0.122292	insig
Lmhp008718	C25H48NO7P	LysoPC 17:2	Lipids	LPC	-	1	461400	554820	656380	1494000	10896000	4708600	1.1423	0.203335	0.328305	10.2228	3.35371	up
Zmsp004363	C23H22O13	Quercetin-3-O-(6''-acetyl)glucoside	Flavonoids	Flavonols	-	3	9	9	9	17557	15506	9643.5	1.31285	0.0266721	0.0961799	1581.72	10.6273	up
Hmln002199	C23H22O13	Quercetin-3-O-(6''-acetyl)galactoside	Flavonoids	Flavonols	-	2	18972	6702.5	3353.5	9	9	9	1.29912	0.17866	0.305037	0.000930136	-10.0703	down
Lmhp009590	C25H50NO7P	LysoPC 17:1	Lipids	LPC	-	1	1216500	1798500	2360700	3156800	31257000	12258000	1.0468	0.23809	0.364611	8.68199	3.11803	up
Hmcp002187	C23H24O13	Limocitrin-3-O-galactoside	Flavonoids	Flavonoid	-	1	9	9	9	10450	4275	16795	1.30843	0.100915	0.20238	1167.41	10.1891	up
HJAP006	C23H24O13	Syringetin-7-O-glucoside	Flavonoids	Flavonoid	-	2	6435	7149.8	6327.2	7812.3	16424	17595	1.04984	0.140422	0.2588	2.10081	1.07094	up
Lmhp010515	C25H52NO7P	LysoPC 17:0(2n isomer)	Lipids	LPC	-	2	4000000	4511400	5151000	6730400	39967000	19109000	1.03868	0.214847	0.341671	4.81661	2.26802	up
pmb2406	C25H52NO7P	LysoPC 17:0	Lipids	LPC	50930-23-9	1	7938200	6791700	5793400	3189600	2830000	1992300	1.2442	0.00845895	0.0525782	0.390381	-1.35705	down
Lmhp009526	C27H46O9	2-α-Linolenoyl-glycerol-1-O-glucoside	Lipids	Glycerol ester	-	2	67710	102680	139210	8338.8	65840	31328	0.952121	0.0651727	0.157279	0.340784	-1.55307	insig
Lmhp009773	C27H46O9	1-α-Linolenoyl-glycerol-3-O-glucoside	Lipids	Glycerol ester	-	2	5442.1	5437.8	10319	2678.3	10283	5762.3	0.312549	0.779766	0.83334	0.883235	-0.179132	insig
Hmqp006235	C26H46NO7P	LysoPC 18:4	Lipids	LPC	-	3	47561	36576	46483	310580	3239800	1201000	1.21179	0.21762	0.343211	36.3756	5.1849	up
pmn001382	C25H24O12	Isochlorogenic acid A	Phenolic acids	Phenolic acids	2450-53-5	3	9	9	9	299360	326340	344860	1.31561	0.00166324	0.033426	35946.7	15.1336	up
pmn001384	C25H24O12	Isochlorogenic acid C	Phenolic acids	Phenolic acids	57378-72-0	3	9	9	9	224220	298120	317510	1.31554	0.0101511	0.0568591	31105.6	14.9249	up
Zmhn000785	C19H32O16	Di-O-Glucosylquinic acid	Phenolic acids	Phenolic acids	-	1	2917700	1774700	1849900	2672100	2310200	1169300	0.213173	0.834937	0.874477	0.940281	-0.0888362	insig
Lmhp010334	C27H48O9	2-Linoleoylglycerol-1-O-glucoside	Lipids	Glycerol ester	-	2	14479	26906	42560	7809.8	34140	20432	0.43467	0.553629	0.646808	0.743127	-0.428319	insig
Lmhp010573	C27H48O9	1-Linoleoylglycerol-3-O-glucoside	Lipids	Glycerol ester	-	2	16121	24420	38045	8690.9	47141	21431	0.213462	0.974946	0.980099	0.983164	-0.0244965	insig
pmb0854	C26H48NO7P	LysoPC 18:3	Lipids	LPC	-	1	57034	45034	38167	148580	946300	429210	1.17355	0.186964	0.312169	10.8681	3.44203	up
pmb0865	C26H48NO7P	LysoPC 18:3(2n isomer)	Lipids	LPC	-	1	1423800	1561900	1719400	1572500	6239300	3306900	0.873848	0.25675	0.379734	2.36312	1.24069	insig
Hmbn002692	C22H30O14	6'-O-Feruloyl-D-sucrose	Phenolic acids	Phenolic acids	118230-77-6	3	62913	67370	57830	46092	46160	57075	1.06113	0.051638	0.139807	0.793815	-0.333125	insig
pmp001251	C26H50NO7P	LysoPC 18:2(2n isomer)	Lipids	LPC	-	1	2096500	2677500	3140400	4138900	12983000	8626000	1.1032	0.143479	0.26231	3.2533	1.7019	up
pmp001273	C26H50NO7P	LysoPC 18:2	Lipids	LPC	-	1	158390	126720	128200	76742	85207	88414	1.23947	0.0246791	0.0944025	0.605751	-0.723203	insig
Li512111	C24H24O13	Isorhamnetin-3-O-(6''-acetylglucoside)	Flavonoids	Flavonols	-	2	36030	28085	19812	9	9	9	1.31383	0.0269021	0.0961799	0.000321708	-11.602	down
Cmsp003083	C26H32O11	Dehydrodiconiferyl alcohol-4-O-glucoside	Others	Others	107870-88-2	2	1157400	696260	746010	837310	907520	626350	0.256061	0.68065	0.753548	0.912108	-0.132723	insig
Lmsp003655	C26H32O11	Dehydrodiconiferyl alcohol-gamma'-O-glucoside	Phenolic acids	Phenolic acids	-	2	1192900	701810	753230	847960	823400	531020	0.483935	0.4763	0.575555	0.831733	-0.265807	insig
pmp001281	C26H52NO7P	LysoPC 18:1	Lipids	LPC	-	1	849610	1301600	1667800	1011500	6121400	2360800	0.690754	0.341112	0.464753	2.48591	1.31377	insig
Lmhp010190	C26H52NO7P	LysoPC 18:1(2n isomer)	Lipids	LPC	-	1	898290	1277000	1698500	1068000	6862000	2415300	0.711309	0.342703	0.464922	2.67059	1.41716	insig
pmb3041	C23H22O14	Tricin-7-O-saccharic acid	Flavonoids	Flavonoid	-	3	13775	16127	16587	18142	15488	17128	0.668542	0.289697	0.410584	1.09183	0.126746	insig
HJN083	C26H34O11	Lariciresinol-4'-O-glucoside	Lignans and Coumarins	Lignans	143663-00-7	2	26423	39920	41520	21172	16363	9863.5	1.12764	0.0310503	0.102531	0.439432	-1.18629	down
pmd0136	C26H54NO7P	LysoPC 18:0(2n isomer)	Lipids	LPC	-	1	214730	240200	266840	406110	3359100	1026800	1.02804	0.27026	0.389652	6.63925	2.73102	up
mws0126	C26H54NO7P	LysoPC 18:0	Lipids	LPC	19420-57-6	1	4761100	5724100	4694500	3235100	2962900	2234700	1.21698	0.00755337	0.0492004	0.555525	-0.848077	insig
Lmtn003096	C26H36O11	Secoisolariciresinol 4-O-glucoside	Lignans and Coumarins	Lignans	-	2	28974	30206	28920	15599	32932	16480	0.800823	0.305161	0.426777	0.737923	-0.438458	insig
Lmzn003953	C28H36O10	Nomilinic acid	Others	Others	35930-20-2	2	2138300	1668500	2024000	1467300	1646200	1414000	1.07203	0.0725949	0.166356	0.77648	-0.364979	insig
Lmhp007840	C27H52NO7P	LysoPC 19:2	Lipids	LPC	-	3	128080	163860	138560	131140	720190	265850	0.766696	0.327532	0.449992	2.59508	1.37578	insig
Lmhp010908	C27H54NO7P	LysoPC 19:1	Lipids	LPC	-	2	1402200	1120800	1118400	1252600	5953700	2784200	0.884807	0.265586	0.385183	2.74359	1.45606	insig
Zmfn000481	C14H22N2O16P2	Uridine-5'-Diphosphate-D-Xylose	Nucleotides and derivatives	Nucleotides and derivatives	626915	2	853280	738140	652390	765420	765500	768610	0.26639	0.779887	0.83334	1.02483	0.0353885	insig
pmb2228	C27H56NO7P	LysoPC 19:0	Lipids	LPC	108273-88-7	3	64990	38177	64003	54041	271540	122110	0.833677	0.281745	0.401107	2.67806	1.42119	insig
Lmdn001925	C26H34O12	Olivil-4'-O-glucoside	Lignans and Coumarins	Lignans	76880-93-8	3	21550	10419	10068	9	9	9	1.31142	0.0654514	0.157279	0.000642291	-10.6045	down
pmc0960	C28H50NO7P	LysoPC 20:4	Lipids	LPC	-	3	27188	25218	28221	2386000	15604000	7925100	1.29122	0.153665	0.274175	321.42	8.32831	up
Lmhp009890	C28H52NO7P	LysoPC 20:3	Lipids	LPC	1199257-41-4	3	15000	10026	16344	3017800	21808000	9476200	1.29497	0.174058	0.299363	829.152	9.69549	up
pmb0608	C25H24O14	Chrysoeriol-7-O-(6''-malonyl)glucoside*	Flavonoids	Flavonoid	-	1	165770	162770	174990	174420	161760	190710	0.520079	0.462606	0.563301	1.04639	0.0654241	insig
pmn001671	C23H32O15	Furanofructosyl-α-D-(6-mustard acyl)glucoside	Phenolic acids	Phenolic acids	-	2	559110	793380	935450	963900	845780	979940	0.737296	0.263844	0.38425	1.21927	0.286019	insig
pmn001672	C23H32O15	Furanofructosyl-α-D-(3-mustard acyl)glucoside	Phenolic acids	Phenolic acids	-	2	43536	42687	71225	155900	120830	130400	1.22856	0.00422595	0.0415691	2.58581	1.37061	up
Lmsn003628	C23H32O15	6′-O-Sinapoylsucrose	Phenolic acids	Phenolic acids	-	2	39044	52479	39823	91478	120980	78826	1.21471	0.0389244	0.118271	2.21768	1.14905	up
Lmhp011549	C28H56NO7P	LysoPC 20:1	Lipids	LPC	-	3	824250	869310	1063400	1253100	8973400	3184600	0.980937	0.265344	0.385183	4.86445	2.28228	insig
pmp000589	C24H22O15	Quercetin-7-O-(6''-malonyl)glucoside	Flavonoids	Flavonols	-	3	70482	13954	13843	10096	18204	5759.2	0.728751	0.374166	0.495588	0.346556	-1.52884	insig
Hmln002189	C24H22O15	Quercetin-3-O-(6''-malonyl)galactoside	Flavonoids	Flavonols	-	2	63866	28506	21071	9	9	9	1.31015	0.103374	0.205666	0.000238005	-12.0367	down
Hmln002355	C27H34O12	5'-Methoxymatairesinoside	Lignans and Coumarins	Lignans	1691201-82-7	3	341260	257180	287730	128100	107290	97566	1.28101	0.0100662	0.0568591	0.375725	-1.41225	down
pmd0143	C28H58NO7P	LysoPC 20:0	Lipids	LPC	108341-80-6	3	34013	33181	29871	18789	16559	11532	1.22568	0.00526655	0.0432191	0.482975	-1.04998	down
Lmmn002260	C27H36O12	5'-Methoxyisolariciresinol-9'-O-glucoside	Lignans and Coumarins	Lignans	-	2	311500	170110	166420	303640	243450	240350	0.62776	0.443544	0.546386	1.21513	0.281109	insig
pmp001088	C30H38O10	7α-Acetyldihydronomilin	Others	Others	-	1	26889	18009	26372	25260	23637	38323	0.596319	0.39592	0.512272	1.2238	0.291364	insig
HJAP064	C25H24O15	Isorhamnetin-3-O-(6''-malonylglucoside)*	Flavonoids	Flavonoid	-	2	22714	8154.4	6440.2	7336.5	9	16683	0.560139	0.565148	0.657841	0.644047	-0.634762	insig
pma0760	C25H24O15	3'-O-Methyltricetin-7-O-(6''-malonyl)glucoside*	Flavonoids	Flavonoid	-	3	20564	12486	4380.5	9	9	9	1.30349	0.116396	0.22317	0.000721337	-10.437	down
Zmhp005139	C25H24O15	Tamarixetin-3-O-(6''-malonyl)glucoside	Flavonoids	Flavonoid	-	1	30534	9	9	9	9	9	0.574338	0.42265	0.526789	0.000883739	-10.1441	insig
pmp000236	C26H28O14	Isovitexin-8-O-xylcoside	Flavonoids	Flavonoid carbonoside	-	2	40913	47640	37042	13270	12071	9490	1.29562	0.00537575	0.0434224	0.277328	-1.85034	down
pmb2922	C15H24N2O17P2	Uridine 5'-diphospho-D-glucose	Nucleotides and derivatives	Nucleotides and derivatives	133-89-1	1	5535600	5904900	5009200	4863900	5216100	5660600	0.408811	0.534082	0.630946	0.956893	-0.0635707	insig
pmb0720	C26H26O15	Tricin-7-O-(6''-Malonyl)Glucoside	Flavonoids	Flavonoid	-	3	11491	13768	10675	12587	25650	15244	0.810932	0.277675	0.3965	1.48831	0.573677	insig
Lmyp004963	C27H30O14	Apigenin-6-C-(2''-rhamnosyl)glucoside	Flavonoids	Flavonoid carbonoside	-	3	26866	35267	35266	29313	46192	42619	0.629471	0.320382	0.444144	1.21278	0.278323	insig
mws0046	C27H32O14	Naringenin-7-O-Neohesperidoside(Naringin)*	Flavonoids	Dihydroflavone	10236-47-2	1	23846	14780	9182.5	82362	71869	108970	1.25079	0.0136159	0.0677943	5.50532	2.46083	up
mws1066	C27H32O14	Naringenin-7-O-Rutinoside(Narirutin)*	Flavonoids	Dihydroflavone	14259-46-2	1	23354	15316	17088	78041	117200	116570	1.29037	0.0193306	0.0824369	5.59222	2.48342	up
Lmqn001932	C28H36O13	Syringaresinol-4'-O-glucoside	Lignans and Coumarins	Lignans	7374-79-0	3	108320	130360	166460	30444	39173	24953	1.28152	0.02078	0.0855489	0.233425	-2.09897	down
Zmhn001446	C28H36O13	syringaresinol-4'-O-glucopyranosid	Lignans and Coumarins	Lignans	-	3	214030	300980	272110	126550	95489	87288	1.25912	0.0128064	0.0654643	0.392986	-1.34745	down
pmb0492	C34H37N3O6	N',N'',N'''-p-Coumaroyl-cinnamoyl-caffeoyl spermidine	Alkaloids	Phenolamine	-	3	226800	129850	139180	69837	67896	64130	1.21277	0.0861713	0.184522	0.407121	-1.29647	down
Hmgp003641	C28H32O14	Chrysoeriol-6-C-rhamnoside-7-O-rhamnoside	Flavonoids	Flavonoid	-	2	10285	5205	3593.8	16251	9	9	0.821815	0.883002	0.913749	0.852503	-0.230223	insig
Zmjp005293	C28H32O14	Robinson-7-O-Neohesperidin	Flavonoids	Flavonoid	-	1	14490	6107.5	13693	29413	6781.4	12192	0.294859	0.573384	0.663507	1.41107	0.496793	insig
pmb2936	C28H32O14	Disinapoyl glucoside	Phenolic acids	Phenolic acids	-	3	28780	89917	98042	11786	13947	8879.7	1.19288	0.108227	0.212215	0.159698	-2.64659	down
pmp001288	C28H32O14	Acacetin-7-O-rutinoside (Linarin)	Flavonoids	Flavonoid	480-36-4	1	17085	11715	6462.3	42437	8241	7888	0.255171	0.572331	0.663507	1.66087	0.731937	insig
Rfmb056	C29H36O13	Medioresinol-4'-O-(6'''-acetyl)glucoside	Lignans and Coumarins	Lignans	-	3	13922	16139	22759	8591.7	14998	14393	0.774548	0.218311	0.343732	0.719097	-0.475742	insig
Lmjp002867	C27H30O15	Kaempferol-3-O-neohesperidoside*	Flavonoids	Flavonols	32602-81-6	2	3932.2	9	9	9	9	9	0.574338	0.42265	0.526789	0.0068351	-7.19282	insig
pmp001106	C27H30O15	Vitexin-2''-O-glucoside	Flavonoids	Flavonoid carbonoside	61360-94-9	1	60539	29851	25740	62732	40092	53960	0.693178	0.361644	0.482737	1.35007	0.433038	insig
Lmsn002815	C27H30O15	Kaempferol-3-O-rutinoside(Nicotiflorin)*	Flavonoids	Flavonoid	17650-84-9	1	23175	11868	4106.6	8738.5	3783.5	6506.5	0.57336	0.349329	0.471892	0.486046	-1.04084	insig
Lmnp202682	C27H30O15	5,7,4'-Trihydroxy-8-methoxyflavone-6-C-[Xylosyl-(1-2)]-glucoside	Flavonoids	Flavonoid carbonoside	-	2	13262	9	9	7036.5	9	9	0.0389107	0.70567	0.77319	0.531212	-0.912639	insig
Lmnp102682	C27H30O15	Hispidulin-8-C-(2''-O-xylosyl)glucoside	Flavonoids	Flavonoid carbonoside	-	2	9402.8	6231.8	2326	3084.5	6240	7080.5	0.0149988	0.840527	0.878397	0.913388	-0.1307	insig
mws1073	C27H30O15	Apigenin-6,8-di-C-glucoside (Vicenin-2)	Flavonoids	Flavonoid	23666-13-9	1	612.75	5494.5	1195	9	9	9	1.27937	0.255865	0.379606	0.00369749	-8.07924	down
Lmnp002413	C27H30O15	Luteolin-6-C-rhamnoside-7-O-glucoside	Flavonoids	Flavonoid carbonoside	-	3	9	3133.2	9	9	9	9	0.598333	0.42265	0.526789	0.00856816	-6.8668	insig
Lmlp002990	C27H30O15	Isosaponarin(Isovitexin-4'-O-glucoside)	Flavonoids	Flavonoid carbonoside	19416-87-6	2	3093	4663.5	3097.5	4662.5	5440.8	1540	0.0928574	0.853855	0.890368	1.07272	0.101273	insig
MWSslk254	C27H30O15	Kaempferol-3-O-glucorhamnoside	Flavonoids	Flavonoid carbonoside	40437-72-7	3	1575	5484.5	1548	9	9	9	1.30254	0.16025	0.281696	0.0031368	-8.31649	down
pme1665	C27H30O15	Isovitexin-7-O-glucoside(Saponarin)	Flavonoids	Flavonoid carbonoside	20310-89-8	1	9	9	9	5915.5	5042.5	2747.7	1.3102	0.0403453	0.119901	507.619	8.9876	up
mws1519	C27H32O15	Eriodictyol-7-O-Rutinoside (Eriocitrin)	Flavonoids	Dihydroflavone	13463-28-0	3	10376	3261.8	6016	7095.5	9284.2	1658.5	0.222436	0.869362	0.901596	0.917797	-0.123753	insig
MWSHY0190	C28H32O15	Diosmetin-7-O-rutinoside (Diosmin)	Flavonoids	Flavonoid	520-27-4	1	9	3552.2	9	9	9	9	0.598333	0.42265	0.526789	0.0075626	-7.0469	insig
pmb3002	C28H32O15	Chrysoeriol-7-O-rutinoside	Flavonoids	Flavonoid	-	1	17721	9646.5	7177.8	3918.8	5768.8	7995.5	0.889256	0.212612	0.340394	0.511882	-0.966118	insig
pmp001080	C28H32O15	Diosmetin-7-O-Neohesperidoside (Neodiosmin)	Flavonoids	Flavonoid	38665-01-9	1	3565.5	3551.2	9	9	9	9	0.927071	0.183505	0.309421	0.0037891	-8.04393	insig
pmn001583	C27H30O16	Quercetin-3-O-robinobioside	Flavonoids	Flavonols	52525-35-6	1	41902	9806.8	10322	19568	4908.5	5448	0.617615	0.430678	0.53402	0.482414	-1.05166	insig
Lmmp003091	C27H30O16	Quercetin-3-O-(4''-O-glucosyl)rhamnoside	Flavonoids	Flavonols	59262-54-3	3	146590	16349	17170	49945	9766.5	17896	0.366371	0.517166	0.614781	0.430892	-1.2146	insig
pmb0711	C27H30O16	Quercetin-7-O-rutinoside	Flavonoids	Flavonols	147714-62-3	3	81323	30440	20302	46414	15238	21031	0.46557	0.49409	0.590301	0.626078	-0.675586	insig
Zmxp003107	C27H30O16	Luteolin-7,3'-di-O-glucoside	Flavonoids	Flavonoid	52187-80-1	3	9400	6246.8	10915	21086	3891	8878.2	0.0546015	0.685814	0.757502	1.27458	0.350025	insig
Lmsp004166	C27H30O16	Quercetin-3-O-glucoside-7-O-rhamnoside	Flavonoids	Flavonols	-	2	92267	21844	25376	50629	28210	11613	0.379499	0.568945	0.661451	0.648462	-0.624906	insig
mws0059	C27H30O16	Quercetin-3-O-rutinoside (Rutin)	Flavonoids	Flavonols	153-18-4	1	51986	14209	8945.2	18448	3787	7122.5	0.683654	0.379479	0.49731	0.390703	-1.35586	insig
Xmyp005599	C27H30O16	Kaempferol-3-O-galactoside-4'-O-glucoside	Flavonoids	Flavonoid	-	3	21158	9	9	9	9	9	0.574338	0.42265	0.526789	0.00127503	-9.61525	insig
Hmpp002612	C27H30O16	Luteolin-7-O-gentiobioside	Flavonoids	Flavonoid	-	3	12141	12486	2335	12559	3899.2	4670.2	0.145409	0.67721	0.751664	0.783636	-0.351744	insig
pmb0665	C27H30O16	Orientin-7-O-glucoside	Flavonoids	Flavonoid carbonoside	-	3	9	9	9	7489	6201.5	4155	1.31252	0.0256862	0.0954133	660.944	9.36839	up
MWSHY0116	C28H34O15	Hesperidin	Flavonoids	Flavonoid	520-26-3	1	9	4064.3	9	1425	2805	2814	0.843718	0.548956	0.642927	1.7255	0.787013	insig
MWSHY0019	C28H34O15	Hesperetin-7-O-neohesperidoside(Neohesperidin)	Flavonoids	Dihydroflavone	13241-33-3	1	4165	3438.2	712.25	8436	3519	1919.2	0.489458	0.464891	0.56536	1.66848	0.738538	insig
Lmpp003662	C30H27O14+	Delphinidin-3-O-(6''-O-p-coumaroyl)glucoside	Flavonoids	Anthocyanins	-	2	115720	26959	23048	51132	17997	12438	0.548515	0.460747	0.561757	0.492177	-1.02275	insig
mws4134	C20H32N6O12S2	Oxiglutatione	Amino acids and derivatives	Amino acids and derivatives	27025-41-8	1	2439300	2019900	1554700	605360	630010	787030	1.25957	0.0299903	0.100384	0.336288	-1.57223	down
HJAP020	C27H32O16	Eriodictyol-5,3'-Di-O-glucoside	Flavonoids	Dihydroflavone	-	3	55080	110660	153360	104320	149120	153640	0.561575	0.431259	0.53402	1.27571	0.351304	insig
Rfmb26201	C30H38O14	Syringaresinol-4'-O-(6''-acetyl)glucoside	Lignans and Coumarins	Lignans	-	1	335590	549790	531320	167720	183350	132510	1.24892	0.0398874	0.119286	0.341343	-1.55071	down
Hmjp002999	C28H32O16	Isorhamnetin-3-O-rutinoside (Narcissin)	Flavonoids	Flavonoid	604-80-8	3	40920	13341	17242	8610.8	11569	17644	0.736844	0.321798	0.445459	0.528982	-0.918709	insig
HJAP120	C28H32O16	Rhamnetin-3-O-Rutinoside	Flavonoids	Flavonoid	-	3	50302	19635	8636.2	8610.8	14158	23045	0.37924	0.479626	0.577373	0.583072	-0.778255	insig
HJN051	C28H32O16	Tamarixetin-3-O-rutinoside	Flavonoids	Flavonoid	-	1	12746	6426	4903.8	9	9	9	1.30963	0.0791943	0.174337	0.00112146	-9.80041	down
Lmhp003217	C28H32O16	2'-Hydoxy,5-methoxyGenistein-O-rhamnosyl-glucoside	Flavonoids	Isoflavones	-	1	32269	24939	15639	12506	22128	23477	0.449243	0.458004	0.560569	0.797713	-0.326058	insig
Lmsp004721	C28H32O16	Tamarixetin-3-O-glucoside-7-O-rhamnoside	Flavonoids	Flavonoid	-	1	46463	20328	10966	15647	20533	27349	0.0617804	0.705709	0.77319	0.81702	-0.291557	insig
Lmmp002463	C28H32O16	Sexangularetin-3-O-glucoside-7-O-rhamnoside	Flavonoids	Flavonols	-	1	46435	22723	10189	12505	14064	19574	0.487991	0.407736	0.522583	0.581534	-0.782064	insig
MWSHY0064	C28H32O16	Isorhamnetin-3-O-neohespeidoside	Flavonoids	Flavonoid	55033-90-4	1	34647	18044	9402	11712	17213	18796	0.21874	0.589759	0.679831	0.768541	-0.379806	insig
Zmhn002574	C28H32O16	Rhamnazin 3-Glucosyl-Arabinofuranoside	Flavonoids	Flavonoid	-	3	3639.7	2553.8	1555.2	2712.7	2439.1	4692.4	0.507061	0.495747	0.591537	1.27043	0.34532	insig
Lmpp003815	C31H29O14+	Petunidin-3-O-(6''-O-p-Coumaroyl)glucoside	Flavonoids	Anthocyanins	-	3	40890	25758	11000	28881	12605	10203	0.469729	0.459405	0.561561	0.665684	-0.587091	insig
Lmtp003677	C27H30O17	Quercetin-3-O-sophoroside (Baimaside)	Flavonoids	Flavonols	18609-17-1	3	12800	9	9	9	9	9	0.574338	0.42265	0.526789	0.00210641	-8.891	insig
pmb2970	C28H34O16	Hesperetin-5,7-di-O-glucoside	Flavonoids	Dihydroflavonol	-	3	45906	47832	52348	40483	38790	26713	1.03199	0.0737977	0.167671	0.725504	-0.462944	insig
pmb0618	C28H34O16	Hesperetin-8-C-glucoside-3'-O-glucoside	Flavonoids	Flavonoid carbonoside	-	3	16675	14778	9370.4	9	9	9	1.31364	0.0249311	0.0944025	0.000661385	-10.5622	down
Hmcp001578	C28H32O17	Isorhamnetin-3,7-O-diglucoside	Flavonoids	Flavonols	6758-51-6	1	470530	483320	404080	42136	42354	48232	1.31216	0.0034202	0.0406576	0.0977385	-3.35493	down
pmb2653	C24H42O20	D(+)-Melezitose O-rhamnoside	Others	Saccharides and Alcohols	-	3	9000.9	5150	8070	28091	16456	15051	1.16043	0.0851866	0.183301	2.68207	1.42335	up
pmp000128	C29H32O17	Limocitrin-3-O-(3-hydroxy-3-methylglutarate)glucoside	Flavonoids	Flavonols	-	1	28491	20204	22149	9720.2	30100	10512	0.700269	0.418761	0.526789	0.710465	-0.493164	insig
pmb0578	C32H30O15	Luteolin-7-O-(6''-sinapoyl)glucoside	Flavonoids	Flavonoid	-	3	5817.9	8932.5	10707	9	9	9	1.3144	0.027259	0.0963691	0.0010606	-9.88091	down
pmb0530	C21H27N7O14P2	Nicotinic acid adenine dinucleotide	Nucleotides and derivatives	Nucleotides and derivatives	53-84-9	1	2416300	1956900	1768900	1241100	1335000	1237700	1.21479	0.0527687	0.141361	0.620928	-0.687503	insig
pmb0579	C33H32O15	Chrysoeriol-7-O-(6''-sinapoyl)glucoside	Flavonoids	Flavonoid	-	3	9	9	9	9	11288	10478	0.938742	0.184069	0.309823	806.481	9.6555	insig
Lmhp008513	C33H56O14	2-α-Linolenoyl-glycerol-1,3-di-O-glucoside	Lipids	Glycerol ester	-	1	65788	75724	147360	11141	64642	23696	0.977645	0.119032	0.226852	0.344371	-1.53797	insig
pmp001276	C33H56O14	1-Linolenoyl-rac-glycerol-diglucoside	Lipids	Free fatty acids	-	1	134690	175900	120200	126230	66249	132200	0.697528	0.261781	0.383965	0.753683	-0.407971	insig
Lmhp009384	C33H58O14	1-Linoleoylglycerol-2,3-di-O-glucoside	Lipids	Glycerol ester	-	2	17893	30740	56486	8969.6	54844	19913	0.394839	0.711311	0.776644	0.796493	-0.328266	insig
pmp001271	C33H58O14	1-Linoleoyl-sn-glycerol-diglucoside	Lipids	Free fatty acids	-	1	14077	27963	44299	5539.9	39229	22001	0.403786	0.644254	0.72401	0.773346	-0.370815	insig
Lmhp009190	C33H58O14	2-Linoleoylglycerol-1,3-di-O-glucoside	Lipids	Glycerol ester	-	1	18578	23866	56989	8675.9	47621	23582	0.337713	0.713503	0.778143	0.803344	-0.31591	insig
Lmmn004145	C38H60O10	3-O-(2-O-Acetyl-glucosyl)oleanolic acid	Terpenoids	Triterpene	-	3	3877300	5231200	8640800	849660	4794400	2420700	0.860263	0.154395	0.274961	0.454371	-1.13806	insig
pmp001083	C34H53N7O9	Citrusin I	Alkaloids	Alkaloids	139626-28-1	1	7584800	5816600	5529300	1980400	1933000	1987400	1.29421	0.0211372	0.0865158	0.311705	-1.68175	down
Lmsp003881	C33H40O19	Kaempferol-3-O-rutinoside-7-O-rhamnoside	Flavonoids	Flavonols	-	2	9	9	3803.8	1515	3820.5	1540	0.841707	0.536457	0.632966	1.79902	0.847212	insig
pme2651	C21H28N7O17P3	NADP (Nicotinamide adenine dinucleotide phosphate)	Nucleotides and derivatives	Nucleotides and derivatives	53-59-8	3	1087400	1374300	633900	1690700	1568100	1626200	0.97199	0.105852	0.209284	1.57805	0.658139	insig
HJAP128	C34H42O20	Isorhamnetin-3-O-rutinoside-7-O-rhamnoside	Flavonoids	Flavonoid	-	3	9	9	9	4728.8	9	9	0.577361	0.42265	0.526789	175.807	7.45785	insig
Lmmp002755	C33H40O21	Quercetin-7-O-rutinoside-4'-O-glucoside	Flavonoids	Flavonols	-	2	9	9	9	16148	9	9	0.577361	0.42265	0.526789	598.741	9.22579	insig
Zmhp002640	C33H40O21	6-Hydroxykaempferol 3-Rutinoside-6-glucoside	Flavonoids	Flavonoid	-	2	6036.5	5537.2	3016.5	4975	4506.2	5027	0.117668	0.979504	0.982604	0.99438	-0.00813112	insig
Lmsp002982	C33H40O21	Quercetin-3-O-sophoroside-7-O-rhamnoside	Flavonoids	Flavonols	-	2	3350.2	6151.4	5982	3858.7	3848	3766.2	0.742022	0.278281	0.39677	0.740971	-0.432511	insig
mws1150	C35H46O20	Echinacoside	Phenolic acids	Phenolic acids	82854-37-3	2	9556.2	12456	8067.5	7120	3804	3807.5	1.1072	0.0405681	0.120188	0.489749	-1.02989	down

## Sheet: Table S3
Table S3. List of enriched KEGG for DAMs detected in RN0						#KEGG_n	116	KEGG_N	354
#Kegg_pathway	ko_id	Cluter_frequency	Metabolome_frequency	P-value	Corrected_P-value	#Pathway	ko_ID	Unique compound	compound	Uni_all	compound_all
Arginine biosynthesis	ko00220	8 out of 116 6.89655172413793%	11 out of 354 3.10734463276836%	0.00702038488500966	0.582691945455801	Arginine biosynthesis	ko00220	8	11	116	354	pme2527;pme2380;pme0193;pme0014;Zmyn000155;MWSmce119;pme0075;pme0008	C00077+C00026+C00064+C00025+C00437+C00062+C00624+C00327
Biosynthesis of amino acids	ko01230	23 out of 116 19.8275862068966%	47 out of 354 13.2768361581921%	0.0101034443863919	0.838585884070526	Biosynthesis of amino acids	ko01230	23	47	116	354	pme0075;pme0008;mws0671;MWSmce119;mws1050;pme0193;pme2735;mws2125;Zmzn000078;pme0014;mws1346;Zmyn000155;Lmbn001609;pme1712;pme0010;mws0254;pme2527;pme0026;pme0195;pme1987;pme0021;pme0006;pme2380	C00624+C00327+C00263+C00062+C00979+C00064+C00019+C00074+C00111+C00025+C00956+C00437+C06006+C00449+C00065+C00135+C00077+C00047+C00097+C00041+C00079+C00148+C00026
Sulfur relay system	ko04122	4 out of 116 3.44827586206897%	4 out of 354 1.12994350282486%	0.0111304155033449	0.923824486777627	Sulfur relay system	ko04122	4	4	116	354	pme1987;pme0195;mws1050;pme2735	C00041+C00097+C00979+C00019
Arachidonic acid metabolism	ko00590	5 out of 116 4.31034482758621%	6 out of 354 1.69491525423729%	0.015706323859849	1	Arachidonic acid metabolism	ko00590	5	6	116	354	mws0955;mws0879;mws0369;mws0954;mws0945	C14807+C14777+C00219+C04805+C04577
D-Arginine and D-ornithine metabolism	ko00472	3 out of 116 2.58620689655172%	3 out of 354 0.847457627118644%	0.0345732375369385	1	D-Arginine and D-ornithine metabolism	ko00472	3	3	116	354	pme2527;MWSmce119;pme2292	C00077+C00062+C00134
Aminoacyl-tRNA biosynthesis	ko00970	10 out of 116 8.62068965517241%	18 out of 354 5.08474576271186%	0.0347922971156649	1	Aminoacyl-tRNA biosynthesis	ko00970	10	18	116	354	MWSmce119;pme0026;pme0014;pme1987;pme0195;pme0193;pme0006;mws0254;pme0021;pme0010	C00062+C00047+C00025+C00041+C00097+C00064+C00148+C00135+C00079+C00065
Lysine biosynthesis	ko00300	5 out of 116 4.31034482758621%	7 out of 354 1.9774011299435%	0.0405189794030432	1	Lysine biosynthesis	ko00300	5	7	116	354	pme1712;mws1346;pme0026;mws0671;pme2380	C00449+C00956+C00047+C00263+C00026
Purine metabolism	ko00230	10 out of 116 8.62068965517241%	19 out of 354 5.36723163841808%	0.053128266344592	1	Purine metabolism	ko00230	10	19	116	354	mws0668;pmb0981;mws0874;pme0040;pmb0998;pme1178;pme0256;pme1109;pmc0066;pme0193	C01762+C00020+C01367+C00147+C00144+C00387+C00385+C00242+C06196+C00064
Arginine and proline metabolism	ko00330	11 out of 116 9.48275862068965%	22 out of 354 6.21468926553672%	0.06418795907001	1	Arginine and proline metabolism	ko00330	11	22	116	354	pme2292;pme2527;pme0006;pme2693;MWSmce119;pme0295;ML10197929;pme0014;pme2735;Lmlp003161;mws0567	C00134+C00077+C00148+C02714+C00062+C02946+C00300+C00025+C00019+C10497+C01035
Glutathione metabolism	ko00480	6 out of 116 5.17241379310345%	10 out of 354 2.82485875706215%	0.0680812509679586	1	Glutathione metabolism	ko00480	6	10	116	354	pme0014;pme2527;pme0195;pme2292;pme1086;mws4134	C00025+C00077+C00097+C00134+C00051+C00127
ABC transporters	ko02010	20 out of 116 17.2413793103448%	47 out of 354 13.2768361581921%	0.087226778404715	1	ABC transporters	ko02010	20	47	116	354	pmf0138;pme0014;pme1178;MWSmce119;mws4170;mws0668;pme2527;mws0191;pme2292;pme0193;pme0010;pme1086;mws0254;pme1987;pme0026;pme2266;mws0232;pme0516;pme0006;pme0021	C00159+C00025+C00387+C00062+C00031+C01762+C00077+C00719+C00134+C00064+C00065+C00051+C00135+C00041+C00047+C00120+C00255+C00137+C00148+C00079
Glycerophospholipid metabolism	ko00564	4 out of 116 3.44827586206897%	6 out of 354 1.69491525423729%	0.0928027892976312	1	Glycerophospholipid metabolism	ko00564	4	6	116	354	Zmzn000078;mws0704;mws0120;pme1691	C00111+C00346+C00670+C01996
Taurine and hypotaurine metabolism	ko00430	4 out of 116 3.44827586206897%	6 out of 354 1.69491525423729%	0.0928027892976312	1	Taurine and hypotaurine metabolism	ko00430	4	6	116	354	pme0014;pme0195;pme1987;pme2380	C00025+C00097+C00041+C00026
Sulfur metabolism	ko00920	4 out of 116 3.44827586206897%	6 out of 354 1.69491525423729%	0.0928027892976312	1	Sulfur metabolism	ko00920	4	6	116	354	pme0195;mws0671;mws1050;pme0010	C00097+C00263+C00979+C00065
Carbapenem biosynthesis	ko00332	3 out of 116 2.58620689655172%	4 out of 354 1.12994350282486%	0.104901703637719	1	Carbapenem biosynthesis	ko00332	3	4	116	354	pme0006;pme0014;pme0195	C00148+C00025+C00097
Inositol phosphate metabolism	ko00562	3 out of 116 2.58620689655172%	4 out of 354 1.12994350282486%	0.104901703637719	1	Inositol phosphate metabolism	ko00562	3	4	116	354	Zmzn000078;pme0516;pme3705	C00111+C00137+C00191
Caffeine metabolism	ko00232	2 out of 116 1.72413793103448%	2 out of 354 0.564971751412429%	0.106752452745635	1	Caffeine metabolism	ko00232	2	2	116	354	mws0668;pme0256	C01762+C00385
Sphingolipid metabolism	ko00600	2 out of 116 1.72413793103448%	2 out of 354 0.564971751412429%	0.106752452745635	1	Sphingolipid metabolism	ko00600	2	2	116	354	mws0704;pme0010	C00346+C00065
Nitrogen metabolism	ko00910	2 out of 116 1.72413793103448%	2 out of 354 0.564971751412429%	0.106752452745635	1	Nitrogen metabolism	ko00910	2	2	116	354	pme0014;pme0193	C00025+C00064
Tyrosine metabolism	ko00350	7 out of 116 6.03448275862069%	14 out of 354 3.95480225988701%	0.134159059584318	1	Tyrosine metabolism	ko00350	7	14	116	354	Lmbn001981;pme3827;pme1002;Lmgn000219;mws2367;mws0117;mws0182	C05585+C00355+C00483+C00232+C06046+C05582+C00642
Histidine metabolism	ko00340	4 out of 116 3.44827586206897%	7 out of 354 1.9774011299435%	0.162514535823749	1	Histidine metabolism	ko00340	4	7	116	354	pme0014;pme0181;pme2380;mws0254	C00025+C01152+C00026+C00135
Lysine degradation	ko00310	6 out of 116 5.17241379310345%	12 out of 354 3.38983050847458%	0.162706866290719	1	Lysine degradation	ko00310	6	12	116	354	Lmbn001467;pme1712;pme2380;Rfmb319;mws1346;pme0026	C03087+C00449+C00026+C00408+C00956+C00047
Cysteine and methionine metabolism	ko00270	7 out of 116 6.03448275862069%	15 out of 354 4.23728813559322%	0.18487774152953	1	Cysteine and methionine metabolism	ko00270	7	15	116	354	mws1050;mws0671;pme1987;pme0195;pme2735;pme1086;pme0010	C00979+C00263+C00041+C00097+C00019+C00051+C00065
Tropane, piperidine and pyridine alkaloid biosynthesis	ko00960	5 out of 116 4.31034482758621%	10 out of 354 2.82485875706215%	0.19868438008082	1	Tropane, piperidine and pyridine alkaloid biosynthesis	ko00960	5	10	116	354	pme0026;Rfmb319;pme2292;pme0021;Lmrn003000	C00047+C00408+C00134+C00079+C05607
Alanine, aspartate and glutamate metabolism	ko00250	6 out of 116 5.17241379310345%	13 out of 354 3.67231638418079%	0.223740108214819	1	Alanine, aspartate and glutamate metabolism	ko00250	6	13	116	354	pme2559;pme0193;pme2380;Lmgn000219;pme1987;pme0014	C01042+C00064+C00026+C00232+C00041+C00025
Carbon metabolism	ko01200	11 out of 116 9.48275862068965%	27 out of 354 7.6271186440678%	0.237369380219683	1	Carbon metabolism	ko01200	11	27	116	354	pme3311;Lmgn000219;pme2380;mws2125;pme0010;pme0014;pme1987;pme0195;mws1050;Zmzn000078;pme0534	C00354+C00232+C00026+C00074+C00065+C00025+C00041+C00097+C00979+C00111+C00257
2-Oxocarboxylic acid metabolism	ko01210	11 out of 116 9.48275862068965%	27 out of 354 7.6271186440678%	0.237369380219683	1	2-Oxocarboxylic acid metabolism	ko01210	11	27	116	354	mws0425;pme0021;Lmbn001609;Lmbp000123;pme2380;pme2527;pme0075;mws1346;Zmyn000155;pme0026;pme0014	C02226+C00079+C06006+C17213+C00026+C00077+C00624+C00956+C00437+C00047+C00025
Riboflavin metabolism	ko00740	2 out of 116 1.72413793103448%	3 out of 354 0.847457627118644%	0.251110883163027	1	Riboflavin metabolism	ko00740	2	3	116	354	mws0232;MWS5083	C00255+C00061
Penicillin and cephalosporin biosynthesis	ko00311	2 out of 116 1.72413793103448%	3 out of 354 0.847457627118644%	0.251110883163027	1	Penicillin and cephalosporin biosynthesis	ko00311	2	3	116	354	mws1346;pme0195	C00956+C00097
Biotin metabolism	ko00780	2 out of 116 1.72413793103448%	3 out of 354 0.847457627118644%	0.251110883163027	1	Biotin metabolism	ko00780	2	3	116	354	pme2266;pme0026	C00120+C00047
Ascorbate and aldarate metabolism	ko00053	5 out of 116 4.31034482758621%	11 out of 354 3.10734463276836%	0.272401747046166	1	Ascorbate and aldarate metabolism	ko00053	5	11	116	354	pme2380;pme3705;mws4175;pme0516;Zmyn000108	C00026+C00191+C02670+C00137+C00818
Monobactam biosynthesis	ko00261	3 out of 116 2.58620689655172%	6 out of 354 1.69491525423729%	0.307490291873635	1	Monobactam biosynthesis	ko00261	3	6	116	354	pme2735;pme0010;MWSmce119	C00019+C00065+C00062
Biosynthesis of secondary metabolites	ko01110	44 out of 116 37.9310344827586%	127 out of 354 35.8757062146893%	0.327162767888077	1	Biosynthesis of secondary metabolites	ko01110	44	127	116	354	MWSmce119;mws0671;Lmtn004049;pme0075;pme0008;Hmln002806;pme3311;mws2125;pme0220;MWS5083;pme2292;Zmyn004548;Lmbn001609;mws1346;pme0014;pme0256;mws4085;mws0668;mws4170;Rfmb319;pme0021;pme0026;pmb0981;pme1662;mws1050;pme3827;MWSCX014;pme0534;pme2735;pme2527;mws0254;pme1712;pme0010;pme1002;Zmyn000155;Zmzn000078;pme2380;Lmbp000123;pme0006;pme1987;pme0195;pmb3074;pme0516;mws0232	C00062+C00263+C06082+C00624+C00327+C10434+C00354+C00074+C11512+C00061+C00134+C01226+C06006+C00956+C00025+C00385+C00482+C01762+C00031+C00408+C00079+C00047+C00020+C09833+C00979+C00355+C01752+C00257+C00019+C00077+C00135+C00449+C00065+C00483+C00437+C00111+C00026+C17213+C00148+C00041+C00097+C12208+C00137+C00255
Selenocompound metabolism	ko00450	1 out of 116 0.862068965517241%	1 out of 354 0.282485875706215%	0.327683615819209	1	Selenocompound metabolism	ko00450	1	1	116	354	pme1987	C00041
Carotenoid biosynthesis	ko00906	1 out of 116 0.862068965517241%	1 out of 354 0.282485875706215%	0.327683615819209	1	Carotenoid biosynthesis	ko00906	1	1	116	354	Lmtn004049	C06082
Ether lipid metabolism	ko00565	1 out of 116 0.862068965517241%	1 out of 354 0.282485875706215%	0.327683615819209	1	Ether lipid metabolism	ko00565	1	1	116	354	mws0120	C00670
Phosphatidylinositol signaling system	ko04070	1 out of 116 0.862068965517241%	1 out of 354 0.282485875706215%	0.327683615819209	1	Phosphatidylinositol signaling system	ko04070	1	1	116	354	pme0516	C00137
Zeatin biosynthesis	ko00908	4 out of 116 3.44827586206897%	9 out of 354 2.54237288135593%	0.334534956345534	1	Zeatin biosynthesis	ko00908	4	9	116	354	pme0040;mws1050;pmb0981;pme2735	C00147+C00979+C00020+C00019
Metabolic pathways	ko01100	86 out of 116 74.1379310344828%	257 out of 354 72.5988700564972%	0.374411814787137	1	Metabolic pathways	ko01100	86	257	116	354	pme2380;pme0006;mws0863;pme0195;pme1987;mws4134;pme2559;Lmbn001981;mws0232;pme0516;Lmbn006210;pme2527;mws0191;mws0254;pme0010;Zmyn000108;pme1712;pme1002;pme1109;Zmyn000155;Zmzn000078;pmf0139;mws0182;pma3101;Lmbp000728;ML10197929;pme2735;pme0534;mws0147;mws2367;Lmgn000219;Lmgn000160;mws1050;pme1178;pme3705;Lmrn003000;pme3827;mws0567;Rfmb319;pmb2507;mws0369;pme0021;pme2266;pme0295;mws4175;pme0026;p…	C00026+C00148+C00673+C00097+C00041+C00127+C01042+C05585+C00255+C00137+C03242+C00077+C00719+C00135+C00065+C00818+C00449+C00483+C00242+C00437+C00111+C00124+C00642+C05841+C20782+C00300+C00019+C00257+C20827+C06046+C00232+C02642+C00979+C00387+C00191+C05607+C00355+C01035+C00408+C00672+C00219+C00079+C00120+C02946+C02670+C00047+C00020+C00134+C06104+C00214+C01226+C02714+C02226+C03087+C00051+C06006+C00346+…
Stilbenoid, diarylheptanoid and gingerol biosynthesis	ko00945	2 out of 116 1.72413793103448%	4 out of 354 1.12994350282486%	0.397320062688336	1	Stilbenoid, diarylheptanoid and gingerol biosynthesis	ko00945	2	4	116	354	pmb3074;Hmln002806	C12208+C10434
Glycolysis / Gluconeogenesis	ko00010	3 out of 116 2.58620689655172%	7 out of 354 1.9774011299435%	0.416222108911054	1	Glycolysis / Gluconeogenesis	ko00010	3	7	116	354	mws2125;mws4170;Zmzn000078	C00074+C00031+C00111
Cyanoamino acid metabolism	ko00460	3 out of 116 2.58620689655172%	7 out of 354 1.9774011299435%	0.416222108911054	1	Cyanoamino acid metabolism	ko00460	3	7	116	354	pme0195;pme0021;pme0010	C00097+C00079+C00065
Pentose phosphate pathway	ko00030	4 out of 116 3.44827586206897%	10 out of 354 2.82485875706215%	0.425102007188679	1	Pentose phosphate pathway	ko00030	4	10	116	354	mws0863;pmb2507;mws4170;pme0534	C00673+C00672+C00031+C00257
Phenylalanine metabolism	ko00360	7 out of 116 6.03448275862069%	20 out of 354 5.64971751412429%	0.500232247963117	1	Phenylalanine metabolism	ko00360	7	20	116	354	mws0182;Zmyn002323;pme0021;mws0491;pme2743;ML10179289;Lmrn003000	C00642+C05852+C00079+C05332+C05598+C05853+C05607
C5-Branched dibasic acid metabolism	ko00660	4 out of 116 3.44827586206897%	11 out of 354 3.10734463276836%	0.512359298698683	1	C5-Branched dibasic acid metabolism	ko00660	4	11	116	354	pme2380;pme0014;mws0425;Lmgn000224	C00026+C00025+C02226+C06030
Biosynthesis of unsaturated fatty acids	ko01040	4 out of 116 3.44827586206897%	11 out of 354 3.10734463276836%	0.512359298698683	1	Biosynthesis of unsaturated fatty acids	ko01040	4	11	116	354	mws0369;mws0397;Zmpn003698;Lmbn006210	C00219+C06428+C16522+C03242
Pentose and glucuronate interconversions	ko00040	3 out of 116 2.58620689655172%	8 out of 354 2.25988700564972%	0.518874971336005	1	Pentose and glucuronate interconversions	ko00040	3	8	116	354	Zmzn000078;pme3705;pme2380	C00111+C00191+C00026
Thiamine metabolism	ko00730	2 out of 116 1.72413793103448%	5 out of 354 1.41242937853107%	0.528769077423467	1	Thiamine metabolism	ko00730	2	5	116	354	pme0195;pmb0764	C00097+C04294
Fructose and mannose metabolism	ko00051	2 out of 116 1.72413793103448%	5 out of 354 1.41242937853107%	0.528769077423467	1	Fructose and mannose metabolism	ko00051	2	5	116	354	pmf0138;Zmzn000078	C00159+C00111
Isoquinoline alkaloid biosynthesis	ko00950	2 out of 116 1.72413793103448%	5 out of 354 1.41242937853107%	0.528769077423467	1	Isoquinoline alkaloid biosynthesis	ko00950	2	5	116	354	pme3827;pme1002	C00355+C00483
Propanoate metabolism	ko00640	2 out of 116 1.72413793103448%	5 out of 354 1.41242937853107%	0.528769077423467	1	Propanoate metabolism	ko00640	2	5	116	354	mws0206;Zmzn000078	C05984+C00111
Betalain biosynthesis	ko00965	1 out of 116 0.862068965517241%	2 out of 354 0.564971751412429%	0.548614778892782	1	Betalain biosynthesis	ko00965	1	2	116	354	pme3827	C00355
Plant hormone signal transduction	ko04075	1 out of 116 0.862068965517241%	2 out of 354 0.564971751412429%	0.548614778892782	1	Plant hormone signal transduction	ko04075	1	2	116	354	Lmtn004049	C06082
Porphyrin and chlorophyll metabolism	ko00860	1 out of 116 0.862068965517241%	2 out of 354 0.564971751412429%	0.548614778892782	1	Porphyrin and chlorophyll metabolism	ko00860	1	2	116	354	pme0014	C00025
Glycine, serine and threonine metabolism	ko00260	5 out of 116 4.31034482758621%	15 out of 354 4.23728813559322%	0.580408691146467	1	Glycine, serine and threonine metabolism	ko00260	5	15	116	354	mws0671;pme0195;mws0191;ML10197929;pme0010	C00263+C00097+C00719+C00300+C00065
Nicotinate and nicotinamide metabolism	ko00760	5 out of 116 4.31034482758621%	15 out of 354 4.23728813559322%	0.580408691146467	1	Nicotinate and nicotinamide metabolism	ko00760	5	15	116	354	pme2268;mws2628;Zmzn000078;Lmgn000219;pma3101	C01004+C15987+C00111+C00232+C05841
Carbon fixation in photosynthetic organisms	ko00710	4 out of 116 3.44827586206897%	12 out of 354 3.38983050847458%	0.593161331397994	1	Carbon fixation in photosynthetic organisms	ko00710	4	12	116	354	mws2125;Zmzn000078;pme3311;pme1987	C00074+C00111+C00354+C00041
Amino sugar and nucleotide sugar metabolism	ko00520	3 out of 116 2.58620689655172%	9 out of 354 2.54237288135593%	0.611044978831239	1	Amino sugar and nucleotide sugar metabolism	ko00520	3	9	116	354	mws4170;pmf0138;pme3705	C00031+C00159+C00191
Phenylalanine, tyrosine and tryptophan biosynthesis	ko00400	3 out of 116 2.58620689655172%	10 out of 354 2.82485875706215%	0.690734823820909	1	Phenylalanine, tyrosine and tryptophan biosynthesis	ko00400	3	10	116	354	mws2125;pme0021;pme3311	C00074+C00079+C00354
Butanoate metabolism	ko00650	3 out of 116 2.58620689655172%	10 out of 354 2.82485875706215%	0.690734823820909	1	Butanoate metabolism	ko00650	3	10	116	354	Lmgn000219;pme0014;pme2380	C00232+C00025+C00026
alpha-Linolenic acid metabolism	ko00592	3 out of 116 2.58620689655172%	10 out of 354 2.82485875706215%	0.690734823820909	1	alpha-Linolenic acid metabolism	ko00592	3	10	116	354	Zmpn003368;Zmyn004548;pme0220	C16316+C01226+C11512
Phosphonate and phosphinate metabolism	ko00440	1 out of 116 0.862068965517241%	3 out of 354 0.847457627118644%	0.697366726757661	1	Phosphonate and phosphinate metabolism	ko00440	1	3	116	354	mws2125	C00074
Indole alkaloid biosynthesis	ko00901	1 out of 116 0.862068965517241%	3 out of 354 0.847457627118644%	0.697366726757661	1	Indole alkaloid biosynthesis	ko00901	1	3	116	354	mws4170	C00031
Galactose metabolism	ko00052	5 out of 116 4.31034482758621%	17 out of 354 4.80225988700565%	0.707186578250126	1	Galactose metabolism	ko00052	5	17	116	354	pmf0138;mws4170;Zmzn000078;pmf0139;pme0516	C00159+C00031+C00111+C00124+C00137
Vitamin B6 metabolism	ko00750	2 out of 116 1.72413793103448%	7 out of 354 1.9774011299435%	0.728683014713316	1	Vitamin B6 metabolism	ko00750	2	7	116	354	pme0193;Lmgn000219	C00064+C00232
Glyoxylate and dicarboxylate metabolism	ko00630	4 out of 116 3.44827586206897%	14 out of 354 3.95480225988701%	0.728869281362416	1	Glyoxylate and dicarboxylate metabolism	ko00630	4	14	116	354	pme0010;pme0193;pme2380;pme0014	C00065+C00064+C00026+C00025
Flavonoid biosynthesis	ko00941	5 out of 116 4.31034482758621%	18 out of 354 5.08474576271186%	0.759710855128866	1	Flavonoid biosynthesis	ko00941	5	18	116	354	mws0046;pme1662;pmb3074;Hmln002806;Lmyn006227	C09789+C09833+C12208+C10434+C10044
Glycerolipid metabolism	ko00561	1 out of 116 0.862068965517241%	4 out of 354 1.12994350282486%	0.797382281447438	1	Glycerolipid metabolism	ko00561	1	4	116	354	Zmzn000078	C00111
Citrate cycle (TCA cycle)	ko00020	2 out of 116 1.72413793103448%	8 out of 354 2.25988700564972%	0.79861902917242	1	Citrate cycle (TCA cycle)	ko00020	2	8	116	354	mws2125;pme2380	C00074+C00026
Tryptophan metabolism	ko00380	3 out of 116 2.58620689655172%	12 out of 354 3.38983050847458%	0.81244708385632	1	Tryptophan metabolism	ko00380	3	12	116	354	Zmtn001464;mws0677;Zmtn001624	C02470+C00978+C02172
Biosynthesis of various secondary metabolites - part 2	ko00998	3 out of 116 2.58620689655172%	12 out of 354 3.38983050847458%	0.81244708385632	1	Biosynthesis of various secondary metabolites - part 2	ko00998	3	12	116	354	mws2125;pme0021;pme1987	C00074+C00079+C00041
Linoleic acid metabolism	ko00591	5 out of 116 4.31034482758621%	20 out of 354 5.64971751412429%	0.843233934694132	1	Linoleic acid metabolism	ko00591	5	20	116	354	Lmbn005487;mws0369;pmb2787;Lmbn004240;Lmbn006210	C14829+C00219+C14766+C14837+C03242
Starch and sucrose metabolism	ko00500	2 out of 116 1.72413793103448%	9 out of 354 2.54237288135593%	0.852211614984185	1	Starch and sucrose metabolism	ko00500	2	9	116	354	mws4170;Zmyn000083	C00031+C01231
Glucosinolate biosynthesis	ko00966	2 out of 116 1.72413793103448%	9 out of 354 2.54237288135593%	0.852211614984185	1	Glucosinolate biosynthesis	ko00966	2	9	116	354	Lmbp000123;pme0021	C17213+C00079
Oxidative phosphorylation	ko00190	1 out of 116 0.862068965517241%	5 out of 354 1.41242937853107%	0.864535582453429	1	Oxidative phosphorylation	ko00190	1	5	116	354	MWS5083	C00061
beta-Alanine metabolism	ko00410	2 out of 116 1.72413793103448%	10 out of 354 2.82485875706215%	0.892580812775004	1	beta-Alanine metabolism	ko00410	2	10	116	354	Lmgn000160;mws0254	C02642+C00135
Phenylpropanoid biosynthesis	ko00940	7 out of 116 6.03448275862069%	29 out of 354 8.19209039548023%	0.89502425956789	1	Phenylpropanoid biosynthesis	ko00940	7	29	116	354	pme3255;pme0021;pmb3074;pmp001214;MWSCX014;Hmln002806;mws4085	C10454+C00079+C12208+C00933+C01752+C10434+C00482
Pyrimidine metabolism	ko00240	4 out of 116 3.44827586206897%	18 out of 354 5.08474576271186%	0.895376238648571	1	Pyrimidine metabolism	ko00240	4	18	116	354	pmb2507;pme0264;Lmgn000160;pme0193	C00672+C00214+C02642+C00064
Fatty acid biosynthesis	ko00061	1 out of 116 0.862068965517241%	6 out of 354 1.69491525423729%	0.909561004904438	1	Fatty acid biosynthesis	ko00061	1	6	116	354	mws0361	C08362
Valine, leucine and isoleucine degradation	ko00280	1 out of 116 0.862068965517241%	6 out of 354 1.69491525423729%	0.909561004904438	1	Valine, leucine and isoleucine degradation	ko00280	1	6	116	354	mws0147	C20827
Valine, leucine and isoleucine biosynthesis	ko00290	2 out of 116 1.72413793103448%	11 out of 354 3.10734463276836%	0.922570849893507	1	Valine, leucine and isoleucine biosynthesis	ko00290	2	11	116	354	mws0425;Lmbn001609	C02226+C06006
Pyruvate metabolism	ko00620	1 out of 116 0.862068965517241%	7 out of 354 1.9774011299435%	0.939707336602959	1	Pyruvate metabolism	ko00620	1	7	116	354	mws2125	C00074
Pantothenate and CoA biosynthesis	ko00770	2 out of 116 1.72413793103448%	12 out of 354 3.38983050847458%	0.944595603100943	1	Pantothenate and CoA biosynthesis	ko00770	2	12	116	354	Lmgn000160;pme0195	C02642+C00097

## Sheet: Table S6
Table S6. List of all (known and novel) genes identified in RN0 (RD) and/or RN15 (RCK)
ID	RCK_1_fpkm	RCK_2_fpkm	RCK_3_fpkm	RD_1_fpkm	RD_2_fpkm	RD_3_fpkm	RCK_1_count	RCK_2_count	RCK_3_count	RD_1_count	RD_2_count	RD_3_count	log2FoldChange	pvalue	padj	regulated	chr	start	end	strand	gene_name	gene_description	KEGG	KEGG pathway	NR	Swissprot	Tremble	KOG	GO	Pfam
Cs1g01010	36.63	32.18	45.83	28.4	34.67	33.92	1834	1534	2043	1350	1637	1617	-0.216862	0.278775	0.450748	false	chr1	36349	41221	-	Cs1g01010	--	K09495 T-complex protein 1 subunit gamma | (RefSeq) T-complex protein 1 subunit gamma (A)	--	hypothetical protein CICLE_v10025301mg [Citrus clementina]	RecName: Full=T-complex protein 1 subunit gamma {ECO:0000303|PubMed:11599560}; Short=TCP-1-gamma {ECO:0000303|PubMed:11599560}; AltName: Full=CCT-gamma {ECO:0000303|PubMed:11599560}; AltName: Full=Chaperonin CCT3 {ECO:0000303|PubMed:21868675};	RecName: Full=T-complex protein 1 subunit gamma {ECO:0000256|RuleBase:RU004191};	Chaperonin complex component, TCP-1 gamma subunit (CCT3)	GO:0005832,chaperonin-containing T-complex; GO:0005829,cytosol; GO:0005524,ATP binding; GO:0044183,protein binding involved in protein folding; GO:0051082,unfolded protein binding; GO:0006458,'de novo' protein folding; GO:0061077,chaperone-mediated protein folding	PF00118.24:TCP-1/cpn60 chaperonin family
Cs1g01015	17.42	12.2	16.24	21.24	15	11.98	165	110	137	191	134	108	0.0986395	0.765946	0.858761	false	chr1	43246	44273	-	Cs1g01015	--	--	--	--	--	--	--	--	--
Cs1g01020	16.12	14.87	15.98	20.77	18.03	17.5	238	209	210	291	251	246	0.287858	0.125847	0.253533	false	chr1	45593	48821	-	Cs1g01020	--	--	--	hypothetical protein CISIN_1g045337mg, partial [Citrus sinensis]	--	SubName: Full=Uncharacterized protein {ECO:0000313|EMBL:KDO43175.1}; Flags: Fragment;	--	--	--
Cs1g01030	13.4	10.36	12.58	14.76	16.61	17.66	652	480	545	682	762	818	0.455504	0.0145558	0.0487206	false	chr1	53049	60633	-	Cs1g01030	--	--	--	hypothetical protein CICLE_v10026951mg, partial [Citrus clementina]	--	SubName: Full=Uncharacterized protein {ECO:0000313|EMBL:ESR41460.1}; Flags: Fragment;	--	--	--
Cs1g01040	17.18	20.9	15.13	30.01	20.72	17.57	190	220	149	315	216	185	0.389732	0.194865	0.347114	false	chr1	61218	62275	-	Cs1g01040	--	--	--	hypothetical protein CICLE_v10026382mg [Citrus clementina]	RecName: Full=Zinc finger CCCH domain-containing protein 19; Short=AtC3H19; AltName: Full=Protein Needed for RDR2-independent DNA methylation;	SubName: Full=Uncharacterized protein {ECO:0000313|EMBL:ESR41459.1};	GYF domain containing proteins	GO:0005829,cytosol; GO:0005634,nucleus; GO:0003677,DNA binding; GO:0042393,histone binding; GO:0046872,metal ion binding; GO:0032776,DNA methylation on cytosine; GO:0031047,gene silencing by RNA; GO:0010964,regulation of chromatin silencing by small RNA; GO:0006351,transcription, DNA-templated	PF02213.16:GYF domain
Cs1g01050	4.77	4.17	4.54	6.73	5.79	6.74	185	154	157	248	212	249	0.54145	0.00722753	0.027768	false	chr1	65907	71244	-	Cs1g01050	--	--	--	PREDICTED: uncharacterized protein At5g08430 [Citrus sinensis]	RecName: Full=Uncharacterized protein At5g08430;	SubName: Full=Uncharacterized protein {ECO:0000313|EMBL:KDO43183.1};	RNA polymerase I transcription factor UAF	GO:0003677,DNA binding	PF03126.18:Plus-3 domain
Cs1g01060	12.83	13.78	12.57	10.85	12.65	12.41	887	907	774	712	825	817	-0.100485	0.457429	0.627637	false	chr1	77365	84270	-	Cs1g01060	--	K03549 KUP system potassium uptake protein | (RefSeq) putative potassium transporter 12 (A)	--	hypothetical protein CICLE_v10024889mg [Citrus clementina]	RecName: Full=Potassium transporter 7; Short=AtHAK7; Short=AtPOT7;	RecName: Full=Potassium transporter {ECO:0000256|RuleBase:RU321113};	--	GO:0016021,integral component of membrane; GO:0000325,plant-type vacuole; GO:0005886,plasma membrane; GO:0005774,vacuolar membrane; GO:0005773,vacuole; GO:0004016,adenylate cyclase activity; GO:0015079,potassium ion transmembrane transporter activity; GO:0006813,potassium ion transport	PF02705.16:K+ potassium transporter
Cs1g01070	13.65	23.62	13.52	19.83	19.29	20.52	388	639	342	535	517	555	0.261792	0.342359	0.518212	false	chr1	88375	89862	+	Cs1g01070	--	--	--	hypothetical protein CICLE_v10026051mg [Citrus clementina]	RecName: Full=Protein SENSITIVE TO PROTON RHIZOTOXICITY 1 {ECO:0000303|PubMed:17535918}; AltName: Full=Zinc finger protein STOP1 {ECO:0000303|PubMed:17535918};	SubName: Full=Uncharacterized protein {ECO:0000313|EMBL:ESR41456.1};	FOG: Zn-finger	GO:0005634,nucleus; GO:0003700,DNA-binding transcription factor activity; GO:0046872,metal ion binding; GO:0003676,nucleic acid binding; GO:0006355,regulation of transcription, DNA-templated; GO:0010447,response to acidic pH; GO:0010044,response to aluminum ion; GO:0006351,transcription, DNA-templated	PF00096.26:Zinc finger, C2H2 type
Cs1g01090	2.9	2.33	2.33	4.55	3.35	3.95	115	88	82	171	125	149	0.67315	0.0123609	0.0429308	false	chr1	92611	96180	-	Cs1g01090	--	--	--	hypothetical protein CUMW_247780 [Citrus unshiu]	RecName: Full=SUN domain-containing protein 4 {ECO:0000305}; Short=AtSUN4 {ECO:0000303|PubMed:25217773};	SubName: Full=Uncharacterized protein {ECO:0000313|EMBL:GAY66318.1};	Uncharacterized conserved protein	GO:0005783,endoplasmic reticulum; GO:0005789,endoplasmic reticulum membrane; GO:0016021,integral component of membrane; GO:0005635,nuclear envelope; GO:0031965,nuclear membrane; GO:0043621,protein self-association; GO:0006997,nucleus organization	PF07738.13:Sad1 / UNC-like C-terminal
Cs1g01100	32.63	27.61	35.98	36.54	35.2	31.01	1743	1404	1711	1853	1773	1577	0.120244	0.497424	0.663018	false	chr1	101950	108816	+	Cs1g01100	--	K13418 somatic embryogenesis receptor kinase 1 [EC:2.7.10.1 2.7.11.1] | (RefSeq) somatic embryogenesis receptor kinase 1-like (A)	--	PREDICTED: probable LRR receptor-like serine/threonine-protein kinase At5g10290 [Citrus sinensis]	RecName: Full=Probable LRR receptor-like serine/threonine-protein kinase At5g10290; EC=2.7.11.1; Flags: Precursor;	SubName: Full=Uncharacterized protein {ECO:0000313|EMBL:KDO43190.1};	--	GO:0016021,integral component of membrane; GO:0005886,plasma membrane; GO:0005524,ATP binding; GO:0004675,transmembrane receptor protein serine/threonine kinase activity; GO:0007166,cell surface receptor signaling pathway; GO:0006468,protein phosphorylation	PF00069.25:Protein kinase domain
Cs1g01140	1.19	1.56	1.37	2.82	2.09	2.2	78	97	80	175	129	137	0.81635	0.00238026	0.0111931	false	chr1	220212	225419	+	Cs1g01140	--	K13457 disease resistance protein RPM1 | (RefSeq) disease resistance protein RPM1-like (A)	ko04626: Plant-pathogen interaction	PREDICTED: putative disease resistance protein RGA3 [Citrus sinensis]	RecName: Full=Putative disease resistance protein RGA3; AltName: Full=Blight resistance protein B149; AltName: Full=RGA1-blb;	SubName: Full=LRR and NB-ARC domains-containing disease resistance protein {ECO:0000313|EMBL:JAV45279.1}; Flags: Fragment;	Apoptotic ATPase	GO:0043531,ADP binding; GO:0005524,ATP binding; GO:0006952,defense response	PF00931.22:NB-ARC domain
Cs1g01150	9.12	9.78	8.71	14.71	15.84	11	47	48	40	72	77	54	0.614335	0.0541227	0.136459	false	chr1	226136	227163	+	Cs1g01150	--	--	--	hypothetical protein CICLE_v10027618mg [Citrus clementina]	--	SubName: Full=Uncharacterized protein {ECO:0000313|EMBL:ESR41391.1};	--	--	--
Cs1g01160	0.19	0.37	0.46	0.75	0.38	0.59	11	21	24	42	21	33	0.793721	0.159956	0.301069	false	chr1	229441	232877	+	Cs1g01160	--	K13457 disease resistance protein RPM1 | (RefSeq) disease resistance protein RPM1-like (A)	ko04626: Plant-pathogen interaction	PREDICTED: putative disease resistance protein RGA3 [Citrus sinensis]	RecName: Full=Putative disease resistance protein RGA3; AltName: Full=Blight resistance protein B149; AltName: Full=RGA1-blb;	SubName: Full=Uncharacterized protein {ECO:0000313|EMBL:KDO36760.1}; Flags: Fragment;	Apoptotic ATPase	GO:0043531,ADP binding; GO:0005524,ATP binding; GO:0006952,defense response	PF00931.22:NB-ARC domain
Cs1g01180	27.28	24.94	27.93	19.85	17.85	16.61	1630	1419	1486	1126	1006	945	-0.535102	0.000482062	0.00293785	false	chr1	267807	271459	+	Cs1g01180	--	K13457 disease resistance protein RPM1 | (RefSeq) disease resistance protein RPM1-like (A)	ko04626: Plant-pathogen interaction	PREDICTED: putative disease resistance protein RGA3 [Citrus sinensis]	RecName: Full=Putative disease resistance protein RGA3; AltName: Full=Blight resistance protein B149; AltName: Full=RGA1-blb;	SubName: Full=Uncharacterized protein {ECO:0000313|EMBL:KDO47040.1}; Flags: Fragment;	Apoptotic ATPase	GO:0043531,ADP binding; GO:0005524,ATP binding; GO:0006952,defense response	PF00931.22:NB-ARC domain
Cs1g01190	12.52	8.56	13.62	24.54	14.07	18.63	252	164	244	469	267	357	0.751478	0.0206593	0.0643175	false	chr1	287136	288731	-	Cs1g01190	--	--	--	hypothetical protein CICLE_v10026585mg [Citrus clementina]	RecName: Full=Protein MARD1 {ECO:0000303|PubMed:15159630}; AltName: Full=Mediator of ABA-regulated dormancy1 {ECO:0000303|PubMed:15159630}; AltName: Full=Senescence-associated protein SAG102 {ECO:0000303|PubMed:11402199};	SubName: Full=Uncharacterized protein {ECO:0000313|EMBL:GAY66589.1};	--	GO:0010494,cytoplasmic stress granule; GO:0000932,P-body; GO:0046872,metal ion binding; GO:0009737,response to abscisic acid; GO:0010162,seed dormancy process	PF04570.14:zinc-finger of the FCS-type, C2-C2
Cs1g01210	1.59	0.25	1.4	0.15	0.51	0.22	46	7	36	4	14	6	-1.87918	0.0351006	0.097724	false	chr1	301938	304541	-	Cs1g01210	--	--	--	PREDICTED: probable glucan 1,3-beta-glucosidase A [Citrus sinensis]	--	SubName: Full=Uncharacterized protein {ECO:0000313|EMBL:ESR41394.1};	--	GO:0051015,actin filament binding; GO:0004553,hydrolase activity, hydrolyzing O-glycosyl compounds; GO:0007015,actin filament organization; GO:0005975,carbohydrate metabolic process	PF00150.18:Cellulase (glycosyl hydrolase family 5)
Cs1g01220	88.71	48.01	87.46	13.39	23.49	12.84	3468	1787	3044	497	866	478	-2.15625	1.22846e-09	2.46074e-08	down	chr1	305496	308139	-	Cs1g01220	--	--	--	hypothetical protein CUMW_249990 [Citrus unshiu]	--	SubName: Full=Uncharacterized protein {ECO:0000313|EMBL:GAY66592.1};	--	--	PF00150.18:Cellulase (glycosyl hydrolase family 5)
Cs1g01260	2.95	5.2	4.34	2.95	3.56	4.86	100	168	131	95	114	157	-0.104568	0.757753	0.85434	false	chr1	361500	367663	+	Cs1g01260	--	K01834 2,3-bisphosphoglycerate-dependent phosphoglycerate mutase [EC:5.4.2.11] | (RefSeq) 2,3-bisphosphoglycerate-dependent phosphoglycerate mutase-like (A)	ko00010: Glycolysis / Gluconeogenesis; ko00260: Glycine, serine and threonine metabolism; ko01200: Carbon metabolism; ko01230: Biosynthesis of amino acids	PREDICTED: 2,3-bisphosphoglycerate-dependent phosphoglycerate mutase-like [Citrus sinensis]	RecName: Full=Protein DOWNSTREAM OF FLC; Short=AtDFC; AltName: Full=Pollen allergen-like protein; Flags: Precursor;	SubName: Full=Uncharacterized protein {ECO:0000313|EMBL:ESR41399.1}; Flags: Fragment;	Phosphoglycerate mutase	GO:0005615,extracellular space	PF00300.22:Histidine phosphatase superfamily (branch 1)
Cs1g01280	0.71	0.39	0.8	0.18	0.5	0.35	81	42	81	19	54	38	-0.867002	0.097531	0.210411	false	chr1	381320	388820	+	Cs1g01280	--	--	--	hypothetical protein CICLE_v10024974mg [Citrus clementina]	RecName: Full=Nitrate regulatory gene2 protein {ECO:0000303|PubMed:26744214}; Short=NRG2 protein {ECO:0000303|PubMed:26744214};	SubName: Full=Uncharacterized protein {ECO:0000313|EMBL:ESR41403.1};	--	GO:0005634,nucleus; GO:0071249,cellular response to nitrate; GO:0015706,nitrate transport; GO:0071705,nitrogen compound transport; GO:0006355,regulation of transcription, DNA-templated; GO:0010167,response to nitrate; GO:1901698,response to nitrogen compound; GO:0006351,transcription, DNA-templated	PF04782.12:Protein of unknown function (DUF632)
Cs1g01290	1.03	0.83	0.92	1.41	1.77	1.89	74	57	59	96	120	129	0.885035	0.00129331	0.00670392	false	chr1	385007	390455	-	Cs1g01290	--	K00232 acyl-CoA oxidase [EC:1.3.3.6] | (RefSeq) acyl-coenzyme A oxidase 2, peroxisomal (A)	ko00071: Fatty acid degradation; ko00410: beta-Alanine metabolism; ko00592: alpha-Linolenic acid metabolism; ko00640: Propanoate metabolism; ko01040: Biosynthesis of unsaturated fatty acids; ko01200: Carbon metabolism; ko01212: Fatty acid metabolism; ko04146: Peroxisome	hypothetical protein CICLE_v10025052mg [Citrus clementina]	RecName: Full=Acyl-coenzyme A oxidase 2, peroxisomal; Short=AOX 2; EC=1.3.3.6; AltName: Full=Long-chain acyl-CoA oxidase; Short=AtCX2; Flags: Precursor;	RecName: Full=Acyl-coenzyme A oxidase {ECO:0000256|PIRNR:PIRNR000168};	Pristanoyl-CoA/acyl-CoA oxidase	GO:0005777,peroxisome; GO:0003995,acyl-CoA dehydrogenase activity; GO:0003997,acyl-CoA oxidase activity; GO:0071949,FAD binding; GO:0050660,flavin adenine dinucleotide binding; GO:0006635,fatty acid beta-oxidation; GO:0033539,fatty acid beta-oxidation using acyl-CoA dehydrogenase; GO:0001676,long-chain fatty acid metabolic process	PF01756.19:Acyl-CoA oxidase
Cs1g01310	8.08	7.95	7.68	4.55	6.48	6.22	221	207	187	118	167	162	-0.436399	0.0518988	0.132141	false	chr1	406602	408893	+	Cs1g01310	--	--	--	hypothetical protein CICLE_v10025982mg [Citrus clementina]	--	SubName: Full=Uncharacterized protein {ECO:0000313|EMBL:ESR41404.1};	--	--	--
Cs1g01320	37.88	52.32	42.27	24.91	37.24	31.37	1559	2050	1549	973	1445	1229	-0.477714	0.0291905	0.0846413	false	chr1	415970	418124	+	Cs1g01320	--	K09286 EREBP-like factor | (RefSeq) ethylene-responsive transcription factor RAP2-4-like (A)	--	hypothetical protein CICLE_v10025961mg [Citrus clementina]	RecName: Full=Ethylene-responsive transcription factor ERF060;	SubName: Full=Uncharacterized protein {ECO:0000313|EMBL:ESR41405.1};	--	GO:0005634,nucleus; GO:0003677,DNA binding; GO:0003700,DNA-binding transcription factor activity; GO:0009873,ethylene-activated signaling pathway; GO:0006351,transcription, DNA-templated	PF00847.20:AP2 domain
Cs1g01330	8.98	36.03	9.97	5.74	14.27	8.22	351	1341	347	213	526	306	-0.934165	0.111183	0.231901	false	chr1	464992	468137	+	Cs1g01330	--	K01087 trehalose 6-phosphate phosphatase [EC:3.1.3.12] | (RefSeq) probable trehalose-phosphate phosphatase J (A)	ko00500: Starch and sucrose metabolism	PREDICTED: probable trehalose-phosphate phosphatase J isoform X1 [Citrus sinensis]	RecName: Full=Probable trehalose-phosphate phosphatase J; Short=AtTPPJ; EC=3.1.3.12; AltName: Full=Trehalose 6-phosphate phosphatase;	RecName: Full=Trehalose 6-phosphate phosphatase {ECO:0000256|RuleBase:RU361117}; EC=3.1.3.12 {ECO:0000256|RuleBase:RU361117};	Trehalose-6-phosphate synthase component TPS1 and related subunits	GO:0005730,nucleolus; GO:0005634,nucleus; GO:0004805,trehalose-phosphatase activity; GO:0046686,response to cadmium ion; GO:0005992,trehalose biosynthetic process	PF02358.16:Trehalose-phosphatase
Cs1g01370	235.31	170.56	230.81	128.99	127.68	125.69	5060	3492	4419	2633	2589	2573	-0.711686	0.000178574	0.00123751	false	chr1	497398	498625	+	Cs1g01370	--	--	--	PREDICTED: lipoxygenase homology domain-containing protein 1-like [Citrus sinensis]	RecName: Full=PLAT domain-containing protein 1 {ECO:0000305}; Short=AtPLAT1 {ECO:0000303|PubMed:25396746}; Short=PLAT domain protein 1 {ECO:0000303|PubMed:25396746}; Flags: Precursor;	SubName: Full=Uncharacterized protein {ECO:0000313|EMBL:ESR41409.1};	--	GO:0009507,chloroplast; GO:0009535,chloroplast thylakoid membrane; GO:0005783,endoplasmic reticulum; GO:0005886,plasma membrane; GO:0010287,plastoglobule; GO:0009579,thylakoid; GO:0005774,vacuolar membrane; GO:0005773,vacuole; GO:0040008,regulation of growth; GO:0009409,response to cold; GO:0009651,response to salt stress; GO:0009414,response to water deprivation	PF01477.23:PLAT/LH2 domain
Cs1g01390	7.7	10.6	8.65	9	9.82	9.55	238	312	238	264	286	281	0.101113	0.607189	0.747671	false	chr1	507807	511938	-	Cs1g01390	--	K07152 protein SCO1/2 | (RefSeq) protein SCO1 homolog 2, mitochondrial (A)	--	hypothetical protein CICLE_v10026221mg [Citrus clementina]	RecName: Full=Protein SCO1 homolog 2, mitochondrial; AltName: Full=Homolog of the copper chaperone SCO1 member 2; Short=HCC2; Flags: Precursor;	SubName: Full=Uncharacterized protein {ECO:0000313|EMBL:ESR41412.1};	Putative cytochrome C oxidase assembly protein	GO:0016021,integral component of membrane; GO:0005743,mitochondrial inner membrane; GO:0055070,copper ion homeostasis	PF02630.14:SCO1/SenC
Cs1g01410	1.53	3.51	1.69	1.93	2.88	2.31	66	144	65	79	117	95	0.109311	0.79373	0.876308	false	chr1	530580	532837	+	Cs1g01410	--	--	--	hypothetical protein CICLE_v10025465mg [Citrus clementina]	--	SubName: Full=Uncharacterized protein {ECO:0000313|EMBL:ESR41414.1};	--	--	PF05678.14:VQ motif
Cs1g01420	4.06	4.23	5.78	7.25	7.48	9.02	138	137	175	234	240	292	0.783953	0.00136304	0.00699697	false	chr1	544468	546521	+	Cs1g01420	--	--	--	hypothetical protein CICLE_v10025435mg [Citrus clementina]	--	SubName: Full=Uncharacterized protein {ECO:0000313|EMBL:ESR41416.1};	Sugar transporter/spinster transmembrane protein	GO:0016021,integral component of membrane; GO:0055085,transmembrane transport	PF07690.16:Major Facilitator Superfamily
Cs1g01460	26.03	26.12	26.92	22.96	25.31	27.87	1033	987	951	865	947	1053	-0.0288972	0.836963	0.905185	false	chr1	630005	632082	+	Cs1g01460	--	--	--	hypothetical protein CICLE_v10027598mg [Citrus clementina]	--	SubName: Full=Uncharacterized protein {ECO:0000313|EMBL:ESR41419.1};	--	GO:0016021,integral component of membrane	--
Cs1g01500	10.18	6.15	15.53	5.09	5.86	4.64	558	321	758	265	303	242	-1.00788	0.00592036	0.0236175	down	chr1	653944	659222	+	Cs1g01500	--	--	--	hypothetical protein CICLE_v10025180mg [Citrus clementina]	--	SubName: Full=Uncharacterized protein {ECO:0000313|EMBL:ESR41422.1};	--	--	PF07719.17:Tetratricopeptide repeat
Cs1g01505	6.69	7.2	12.74	7.88	13.86	17.2	85	87	144	95	166	208	0.574471	0.172587	0.317781	false	chr1	663293	665795	+	Cs1g01505	--	--	--	hypothetical protein CICLE_v10024720mg [Citrus clementina]	RecName: Full=ABC transporter D family member 1; Short=ABC transporter ABCD.1; Short=AtABCD1; EC=3.6.3.47; AltName: Full=Peroxisomal ABC transporter 1; Short=AtPXA1; AltName: Full=Protein ACETATE NON-UTILIZING 2; AltName: Full=Protein COMATOSE; AltName: Full=Protein PEROXISOME DEFECTIVE 3; Short=Ped3p;	SubName: Full=Uncharacterized protein {ECO:0000313|EMBL:ESR41423.1};	Long-chain acyl-CoA transporter, ABC superfamily (involved in peroxisome organization and biogenesis)	GO:0046861,glyoxysomal membrane; GO:0016021,integral component of membrane; GO:0005524,ATP binding; GO:0042626,ATPase activity, coupled to transmembrane movement of substances; GO:0005324,long-chain fatty acid transporter activity; GO:0016042,lipid catabolic process	--
Cs1g01510	28.43	28.28	29.94	35.09	38.08	36.02	2310	2188	2166	2707	2918	2786	0.358963	0.000568464	0.00337875	false	chr1	666403	675040	+	Cs1g01510	--	K05658 ATP-binding cassette, subfamily B (MDR/TAP), member 1 [EC:3.6.3.44] | (RefSeq) ABC transporter B family member 19-like (A)	ko02010: ABC transporters	hypothetical protein CICLE_v10024720mg [Citrus clementina]	RecName: Full=ABC transporter D family member 1; Short=ABC transporter ABCD.1; Short=AtABCD1; EC=3.6.3.47; AltName: Full=Peroxisomal ABC transporter 1; Short=AtPXA1; AltName: Full=Protein ACETATE NON-UTILIZING 2; AltName: Full=Protein COMATOSE; AltName: Full=Protein PEROXISOME DEFECTIVE 3; Short=Ped3p;	SubName: Full=Uncharacterized protein {ECO:0000313|EMBL:ESR41425.1};	Long-chain acyl-CoA transporter, ABC superfamily (involved in peroxisome organization and biogenesis)	GO:0046861,glyoxysomal membrane; GO:0016021,integral component of membrane; GO:0005524,ATP binding; GO:0042626,ATPase activity, coupled to transmembrane movement of substances; GO:0005324,long-chain fatty acid transporter activity; GO:0016042,lipid catabolic process	PF06472.15:ABC transporter transmembrane region 2
Cs1g01520	8.72	28.53	6.57	18.18	33.62	36.19	146	455	98	289	531	577	1.03591	0.069724	0.164649	false	chr1	677474	678350	+	Cs1g01520	--	--	--	hypothetical protein CICLE_v10027277mg [Citrus clementina]	--	SubName: Full=Uncharacterized protein {ECO:0000313|EMBL:GAY69608.1};	--	--	PF00168.30:C2 domain
Cs1g01530	32.59	37.17	36.01	13.86	18.33	19.74	1058	1149	1041	427	561	610	-1.00154	1.32489e-07	1.90592e-06	down	chr1	681912	685514	+	Cs1g01530	--	--	--	hypothetical protein CICLE_v10026169mg [Citrus clementina]	RecName: Full=DNA oxidative demethylase ALKBH2; EC=1.14.11.33; AltName: Full=Alkylated DNA repair protein alkB homolog 2; AltName: Full=Alpha-ketoglutarate-dependent dioxygenase alkB homolog 2;	SubName: Full=Uncharacterized protein {ECO:0000313|EMBL:ESR41427.1};	--	GO:0005634,nucleus; GO:0103053,1-ethyladenine demethylase activity; GO:0035514,DNA demethylase activity; GO:0046872,metal ion binding; GO:0006281,DNA repair	PF13266.6:Protein of unknown function (DUF4057)
Cs1g01540	236.89	256.53	278.28	195.44	251.04	273.05	5664	5840	5924	4436	5660	6215	-0.0759628	0.672252	0.794375	false	chr1	685821	688275	-	Cs1g01540	--	K17098 annexin D | (RefSeq) annexin D2 (A)	--	PREDICTED: annexin D2 [Citrus sinensis]	RecName: Full=Annexin D2; AltName: Full=AnnAt2;	RecName: Full=Annexin {ECO:0000256|RuleBase:RU003540};	Annexin	GO:0048046,apoplast; GO:0005829,cytosol; GO:0016020,membrane; GO:0005634,nucleus; GO:0009579,thylakoid; GO:0005509,calcium ion binding; GO:0005544,calcium-dependent phospholipid binding; GO:0015774,polysaccharide transport; GO:0009409,response to cold; GO:0009408,response to heat; GO:0009651,response to salt stress; GO:0009414,response to water deprivation	PF00191.20:Annexin
Cs1g01550	14.14	17.98	13.46	16.49	18.91	18.79	532	644	451	589	671	673	0.275902	0.130925	0.261142	false	chr1	690900	695170	+	Cs1g01550	--	--	--	hypothetical protein CICLE_v10025897mg [Citrus clementina]	--	SubName: Full=Uncharacterized protein {ECO:0000313|EMBL:ESR41429.1};	Oxidation resistance protein	--	PF07534.16:TLD
Cs1g01560	34.14	31.51	42.25	40.39	41.58	40.18	1560	1371	1719	1752	1792	1748	0.204847	0.228461	0.390109	false	chr1	695501	702477	-	Cs1g01560	--	K01953 asparagine synthase (glutamine-hydrolysing) [EC:6.3.5.4] | (RefSeq) asparagine synthetase [glutamine-hydrolyzing] 2 (A)	ko00250: Alanine, aspartate and glutamate metabolism; ko01230: Biosynthesis of amino acids	hypothetical protein CICLE_v10025269mg [Citrus clementina]	RecName: Full=Asparagine synthetase [glutamine-hydrolyzing] 3; EC=6.3.5.4; AltName: Full=Glutamine-dependent asparagine synthetase 3;	SubName: Full=Uncharacterized protein {ECO:0000313|EMBL:ESR41430.1};	Asparagine synthase (glutamine-hydrolyzing)	GO:0005829,cytosol; GO:0004066,asparagine synthase (glutamine-hydrolyzing) activity; GO:0005524,ATP binding; GO:0042803,protein homodimerization activity; GO:0006541,glutamine metabolic process; GO:0070981,L-asparagine biosynthetic process; GO:0009646,response to absence of light	PF00733.21:Asparagine synthase
Cs1g01570	31.95	28.15	37.71	24.49	28.35	27.43	925	776	972	673	774	756	-0.26056	0.149657	0.287012	false	chr1	712999	716902	+	Cs1g01570	--	K15272 solute carrier family 35 (UDP-sugar transporter), member A1/2/3 | (RefSeq) CMP-sialic acid transporter 5 (A)	--	PREDICTED: CMP-sialic acid transporter 5 [Citrus sinensis]	RecName: Full=CMP-sialic acid transporter 5; Short=CMP-SA-Tr 5; Short=CMP-Sia-Tr 5;	SubName: Full=Uncharacterized protein {ECO:0000313|EMBL:ESR41431.1};	Predicted UDP-galactose transporter	GO:0005783,endoplasmic reticulum; GO:0000139,Golgi membrane; GO:0016021,integral component of membrane; GO:0015136,sialic acid transmembrane transporter activity; GO:0005351,carbohydrate:proton symporter activity; GO:0005463,UDP-N-acetylgalactosamine transmembrane transporter activity; GO:1903857,negative regulation of cytokinin dehydrogenase activity; GO:1903070,negative regulation of ER-associa…	PF04142.15:Nucleotide-sugar transporter
Cs1g01580	20.73	20.28	22.18	15.97	18.8	18.74	380	354	362	278	325	327	-0.21474	0.187524	0.337527	false	chr1	722644	723603	+	Cs1g01580	--	K02892 large subunit ribosomal protein L23 | (RefSeq) uncharacterized LOC102620099 (A)	ko03010: Ribosome	PREDICTED: uncharacterized protein LOC102620099 [Citrus sinensis]	--	SubName: Full=Uncharacterized protein {ECO:0000313|EMBL:ESR41432.1};	Predicted mitochondrial ribosomal protein L23	GO:0005840,ribosome; GO:0003735,structural constituent of ribosome; GO:0006412,translation	PF00276.20:Ribosomal protein L23
Cs1g01600	31.93	40.79	32.75	23.48	31.84	26.1	739	899	675	516	695	575	-0.348602	0.0739455	0.171387	false	chr1	734724	736892	+	Cs1g01600	--	K07893 Ras-related protein Rab-6A | (RefSeq) ras-related protein RABH1e (A)	--	hypothetical protein CICLE_v10026499mg [Citrus clementina]	RecName: Full=Ras-related protein RABH1e; Short=AtRABH1e;	SubName: Full=Uncharacterized protein {ECO:0000313|EMBL:GAY59546.1};	GTPase Rab6/YPT6/Ryh1, small G protein superfamily	GO:0005829,cytosol; GO:0005794,Golgi apparatus; GO:0000139,Golgi membrane; GO:0005525,GTP binding; GO:0003924,GTPase activity; GO:0006891,intra-Golgi vesicle-mediated transport; GO:0015031,protein transport; GO:0042147,retrograde transport, endosome to Golgi; GO:0006890,retrograde vesicle-mediated transport, Golgi to ER	PF00071.22:Ras family
Cs1g01610	7.77	5.19	12.4	2.42	2.86	2.64	294	187	418	87	102	95	-1.65563	8.99053e-06	8.96971e-05	down	chr1	737666	740711	-	Cs1g01610	--	--	--	hypothetical protein CICLE_v10026269mg [Citrus clementina]	--	SubName: Full=Uncharacterized protein {ECO:0000313|EMBL:ESR41437.1};	--	GO:0016021,integral component of membrane	--
Cs1g01620	1.42	1.02	2.4	1.41	1.81	1.94	83	57	125	78	100	108	0.116352	0.773225	0.862979	false	chr1	746034	750842	+	Cs1g01620	--	K14684 solute carrier family 25 (mitochondrial phosphate transporter), member 23/24/25/41 | (RefSeq) adenine nucleotide transporter BT1, chloroplastic/mitochondrial (A)	--	hypothetical protein CICLE_v10025648mg [Citrus clementina]	RecName: Full=Probable mitochondrial adenine nucleotide transporter BTL3; AltName: Full=Adenine nucleotide transporter BT1-like protein 3;	SubName: Full=Uncharacterized protein {ECO:0000313|EMBL:ESR41441.1};	Mitochondrial solute carrier protein	GO:0016021,integral component of membrane; GO:0005743,mitochondrial inner membrane; GO:0005739,mitochondrion; GO:0009536,plastid; GO:0022857,transmembrane transporter activity; GO:0006839,mitochondrial transport	PF00153.27:Mitochondrial carrier protein
Cs1g01630	13.7	15.31	11.54	14.12	17.75	19.34	564	600	423	552	689	758	0.361484	0.0833074	0.187086	false	chr1	749891	755882	-	Cs1g01630	--	K08819 cyclin-dependent kinase 12/13 [EC:2.7.11.22 2.7.11.23] | (RefSeq) cyclin-dependent kinase C-1 (A)	--	hypothetical protein CICLE_v10025386mg [Citrus clementina]	RecName: Full=Cyclin-dependent kinase C-1; Short=CDKC;1; EC=2.7.11.22; EC=2.7.11.23;	SubName: Full=Uncharacterized protein {ECO:0000313|EMBL:GAY59542.1};	Cdc2-related protein kinase	GO:0005829,cytosol; GO:0005634,nucleus; GO:0005524,ATP binding; GO:0004693,cyclin-dependent protein serine/threonine kinase activity; GO:0016301,kinase activity; GO:0008353,RNA polymerase II CTD heptapeptide repeat kinase activity; GO:0048366,leaf development; GO:0006468,protein phosphorylation; GO:0009615,response to virus	PF00069.25:Protein kinase domain
Cs1g01640	22.21	23.07	21.23	27.73	24.49	25.96	1834	1814	1561	2174	1907	2041	0.260422	0.048696	0.125878	false	chr1	757808	765206	+	Cs1g01640	--	K21596 calmodulin-binding transcription activator | (RefSeq) calmodulin-binding transcription activator 3 (A)	--	hypothetical protein CICLE_v10024764mg [Citrus clementina]	RecName: Full=Calmodulin-binding transcription activator 3 {ECO:0000303|PubMed:11925432}; Short=AtCAMTA3 {ECO:0000303|PubMed:11925432}; AltName: Full=Ethylene-induced calmodulin-binding protein 1 {ECO:0000303|PubMed:11162426}; Short=EICBP1 {ECO:0000303|PubMed:11162426}; AltName: Full=Ethylene-induced calmodulin-binding protein a {ECO:0000303|PubMed:11782485}; Short=EICBP.a {ECO:0000303|PubMed:117…	SubName: Full=Uncharacterized protein {ECO:0000313|EMBL:ESR41444.1};	Uncharacterized conserved protein, contains IPT/TIG domain	GO:0005634,nucleus; GO:0005516,calmodulin binding; GO:0003700,DNA-binding transcription factor activity; GO:0043565,sequence-specific DNA binding; GO:0001077,proximal promoter DNA-binding transcription activator activity, RNA polymerase II-specific; GO:0070417,cellular response to cold; GO:0042742,defense response to bacterium; GO:0050832,defense response to fungus; GO:0010150,leaf senescence; GO…	PF03859.16:CG-1 domain
Cs1g01650	15.44	18.06	17.13	15.62	16.37	15.55	586	653	579	563	586	562	-0.0639698	0.638739	0.770678	false	chr1	765421	770493	-	Cs1g01650	--	K11842 ubiquitin carboxyl-terminal hydrolase 12/46 [EC:3.4.19.12] | (RefSeq) ubiquitin carboxyl-terminal hydrolase 4 (A)	--	hypothetical protein CICLE_v10025895mg [Citrus clementina]	RecName: Full=Ubiquitin carboxyl-terminal hydrolase 3; EC=3.4.19.12; AltName: Full=Deubiquitinating enzyme 3; Short=AtUBP3; AltName: Full=Ubiquitin thioesterase 3; AltName: Full=Ubiquitin-specific-processing protease 3;	SubName: Full=Uncharacterized protein {ECO:0000313|EMBL:GAY59538.1};	Ubiquitin-specific protease	GO:0005634,nucleus; GO:0036459,thiol-dependent ubiquitinyl hydrolase activity; GO:0016579,protein deubiquitination; GO:0006511,ubiquitin-dependent protein catabolic process	PF00443.29:Ubiquitin carboxyl-terminal hydrolase
Cs1g01660	22.85	17.59	19.69	17.82	14.02	17	408	299	313	302	236	289	-0.274287	0.217162	0.375547	false	chr1	771364	773428	+	Cs1g01660	--	K02904 large subunit ribosomal protein L29 | (RefSeq) 50S ribosomal protein L29, chloroplastic (A)	ko03010: Ribosome	hypothetical protein CICLE_v10026623mg [Citrus clementina]	RecName: Full=50S ribosomal protein L29, chloroplastic; AltName: Full=CL29; Flags: Precursor;	SubName: Full=Uncharacterized protein {ECO:0000313|EMBL:ESR41446.1};	60S ribosomal protein L35	GO:0009507,chloroplast; GO:0009941,chloroplast envelope; GO:0009570,chloroplast stroma; GO:0009295,nucleoid; GO:0005840,ribosome; GO:0003735,structural constituent of ribosome; GO:0006412,translation	PF00831.23:Ribosomal L29 protein
Cs1g01670	1.11	3.87	3.99	0.23	1.13	0.51	25	83	80	5	24	11	-2.23373	0.00261211	0.0120752	down	chr1	785956	787334	+	Cs1g01670	--	K09422 transcription factor MYB, plant | (RefSeq) myb-related protein 330 (A)	--	hypothetical protein CICLE_v10026023mg [Citrus clementina]	RecName: Full=Transcription factor MYB93 {ECO:0000303|PubMed:11597504}; AltName: Full=Myb-related protein 93 {ECO:0000303|PubMed:11597504}; Short=AtMYB93 {ECO:0000303|PubMed:11597504};	SubName: Full=Uncharacterized protein {ECO:0000313|EMBL:ESR41447.1};	Transcription factor, Myb superfamily	GO:0005737,cytoplasm; GO:0005634,nucleus; GO:0003700,DNA-binding transcription factor activity; GO:0000981,DNA-binding transcription factor activity, RNA polymerase II-specific; GO:0043565,sequence-specific DNA binding; GO:0001135,RNA polymerase II transcription regulator recruiting activity; GO:0044212,transcription regulatory region DNA binding; GO:0030154,cell differentiation; GO:0071365,cellu…	PF00249.31:Myb-like DNA-binding domain
Cs1g01700	194.8	61.15	228.57	32.09	69.86	51.4	11004	3289	11496	1721	3721	2764	-1.64569	0.000978297	0.00533035	down	chr1	840490	843927	-	Cs1g01700	--	K01858 myo-inositol-1-phosphate synthase [EC:5.5.1.4] | (RefSeq) inositol-3-phosphate synthase (A)	ko00562: Inositol phosphate metabolism	hypothetical protein CICLE_v10025400mg [Citrus clementina]	RecName: Full=Inositol-3-phosphate synthase; Short=MIP synthase; EC=5.5.1.4; AltName: Full=Myo-inositol 1-phosphate synthase; Short=IPS; Short=MI-1-P synthase;	SubName: Full=Uncharacterized protein {ECO:0000313|EMBL:ESR41389.1};	Myo-inositol-1-phosphate synthase	GO:0005737,cytoplasm; GO:0004512,inositol-3-phosphate synthase activity; GO:0006021,inositol biosynthetic process; GO:0008654,phospholipid biosynthetic process	PF07994.12:Myo-inositol-1-phosphate synthase
Cs1g01730	12.92	14.6	6.88	12.8	14.04	14.1	487	524	231	458	499	506	0.275608	0.382544	0.557251	false	chr1	882972	887057	+	Cs1g01730	--	K17469 sulfate transporter 2, low-affinity | (RefSeq) sulfate transporter 2.1-like (A)	--	hypothetical protein CICLE_v10025101mg [Citrus clementina]	RecName: Full=Sulfate transporter 2.1; AltName: Full=AST68;	SubName: Full=Uncharacterized protein {ECO:0000313|EMBL:ESR41387.1};	Sulfate/bicarbonate/oxalate exchanger SAT-1 and related transporters (SLC26 family)	GO:0005887,integral component of plasma membrane; GO:0008271,secondary active sulfate transmembrane transporter activity; GO:0015116,sulfate transmembrane transporter activity; GO:0015293,symporter activity; GO:1902358,sulfate transmembrane transport	PF00916.20:Sulfate permease family
Cs1g01750	1.74	1.51	2.23	0.31	1.26	0.18	41	34	47	7	28	4	-1.63822	0.0320004	0.0907923	false	chr1	900754	902891	-	Cs1g01750	--	--	--	hypothetical protein CICLE_v10026247mg [Citrus clementina]	RecName: Full=Protein NEN4 {ECO:0000303|PubMed:25081480}; AltName: Full=NAC45/NAC86-dependent exonuclease-domain protein 4 {ECO:0000303|PubMed:25081480}; EC=3.1.11.-;	SubName: Full=Uncharacterized protein {ECO:0000313|EMBL:ESR41386.1};	--	GO:0005634,nucleus; GO:0008408,3'-5' exonuclease activity; GO:0046872,metal ion binding; GO:0003676,nucleic acid binding	PF00929.24:Exonuclease
Cs1g01760	45.38	37.09	58.27	38.85	62.51	53.42	1682	1309	1923	1367	2185	1885	0.158557	0.551405	0.705099	false	chr1	903643	908703	-	Cs1g01760	--	K15849 bifunctional aspartate aminotransferase and glutamate/aspartate-prephenate aminotransferase [EC:2.6.1.1 2.6.1.78 2.6.1.79] | (RefSeq) bifunctional aspartate aminotransferase and glutamate/aspartate-prephenate aminotransferase (A)	ko00350: Tyrosine metabolism; ko00360: Phenylalanine metabolism; ko00400: Phenylalanine, tyrosine and tryptophan biosynthesis; ko00950: Isoquinoline alkaloid biosynthesis; ko00960: Tropane, piperidine and pyridine alkaloid biosynthesis; ko01230: Biosynthesis of amino acids	PREDICTED: bifunctional aspartate aminotransferase and glutamate/aspartate-prephenate aminotransferase isoform X1 [Citrus sinensis]	RecName: Full=Bifunctional aspartate aminotransferase and glutamate/aspartate-prephenate aminotransferase; Short=PhPPA-AT; EC=2.6.1.1; EC=2.6.1.78; EC=2.6.1.79; Flags: Precursor;	SubName: Full=Uncharacterized protein {ECO:0000313|EMBL:ESR41384.1};	Kynurenine aminotransferase, glutamine transaminase K	GO:0009507,chloroplast; GO:0033853,aspartate-prephenate aminotransferase activity; GO:0033854,glutamate-prephenate aminotransferase activity; GO:0042802,identical protein binding; GO:0004069,L-aspartate:2-oxoglutarate aminotransferase activity; GO:0080130,L-phenylalanine:2-oxoglutarate aminotransferase activity; GO:0030170,pyridoxal phosphate binding; GO:0009095,aromatic amino acid family biosynt…	PF00155.21:Aminotransferase class I and II
Cs1g01770	5.69	5.92	6.15	4.09	5.08	4.84	419	415	403	286	353	339	-0.316837	0.0519112	0.132156	false	chr1	910882	914736	-	Cs1g01770	--	K20309 trafficking protein particle complex subunit 12 | (RefSeq) trafficking protein particle complex subunit 12 (A)	--	hypothetical protein CICLE_v10025891mg [Citrus clementina]	--	SubName: Full=Uncharacterized protein {ECO:0000313|EMBL:GAY62244.1};	Uncharacterized conserved protein	--	PF07719.17:Tetratricopeptide repeat
Cs1g01790	18.48	22.96	15.33	20.06	19.5	19.19	592	700	437	610	589	585	0.0766933	0.709466	0.820802	false	chr1	933525	940431	+	Cs1g01790	--	K13099 CD2 antigen cytoplasmic tail-binding protein 2 | (RefSeq) CD2 antigen cytoplasmic tail-binding protein 2 homolog (A)	--	PREDICTED: CD2 antigen cytoplasmic tail-binding protein 2 homolog [Citrus sinensis]	--	SubName: Full=Uncharacterized protein {ECO:0000313|EMBL:ESR41381.1};	Uncharacterized protein involved in protein-protein interaction, contains polyproline-binding GYF domain	--	PF17780.1:OCRE domain
Cs1g01800	116.62	209	147.07	109.34	170.57	139.08	4884	8334	5484	4347	6736	5545	-0.14775	0.595689	0.739985	false	chr1	944456	947373	+	Cs1g01800	--	K00423 L-ascorbate oxidase [EC:1.10.3.3] | (RefSeq) L-ascorbate oxidase-like (A)	ko00053: Ascorbate and aldarate metabolism	hypothetical protein CICLE_v10025235mg [Citrus clementina]	RecName: Full=L-ascorbate oxidase; Short=ASO; Short=Ascorbase; EC=1.10.3.3; Flags: Precursor;	SubName: Full=Uncharacterized protein {ECO:0000313|EMBL:ESR41378.1};	Multicopper oxidases	GO:0005576,extracellular region; GO:0005507,copper ion binding; GO:0008447,L-ascorbate oxidase activity	PF00394.22:Multicopper oxidase
Cs1g01840	4.54	3.56	4.67	2.77	2.94	2.91	95	71	87	55	58	58	-0.542799	0.0570036	0.14182	false	chr1	1010670	1011765	-	Cs1g01840	--	--	--	PREDICTED: putative uncharacterized protein DDB_G0271606 [Citrus sinensis]	--	SubName: Full=Uncharacterized protein {ECO:0000313|EMBL:ESR46187.1};	--	--	--
Cs1g01860	61.6	74.17	63.11	68.48	51.91	58.11	1481	1698	1351	1563	1177	1330	-0.126307	0.499725	0.665013	false	chr1	1018552	1019934	-	Cs1g01860	--	K07213 copper chaperone | (RefSeq) copper transport protein ATX1-like (A)	--	hypothetical protein CICLE_v10026695mg [Citrus clementina]	RecName: Full=Heavy metal-associated isoprenylated plant protein 23 {ECO:0000303|PubMed:21072340, ECO:0000303|PubMed:23368984}; Short=AtHIP23 {ECO:0000303|PubMed:21072340, ECO:0000303|PubMed:23368984}; Flags: Precursor;	SubName: Full=Uncharacterized protein {ECO:0000313|EMBL:ESR41373.1};	Copper chaperone	GO:0005737,cytoplasm; GO:0046914,transition metal ion binding; GO:0046916,cellular transition metal ion homeostasis; GO:0030001,metal ion transport	PF00403.26:Heavy-metal-associated domain
Cs1g01880	0.57	1.16	0.48	1.85	1.5	1.29	33	64	25	102	82	71	1.09884	0.0137168	0.0464904	up	chr1	1037606	1040644	-	Cs1g01880	--	K13457 disease resistance protein RPM1 | (RefSeq) disease resistance protein RPM1-like (A)	ko04626: Plant-pathogen interaction	PREDICTED: putative disease resistance protein RGA3 isoform X1 [Citrus sinensis]	RecName: Full=Disease resistance protein RGA2; AltName: Full=Blight resistance protein RPI; AltName: Full=RGA2-blb;	SubName: Full=Uncharacterized protein {ECO:0000313|EMBL:KDO36240.1}; Flags: Fragment;	Apoptotic ATPase	GO:0043531,ADP binding; GO:0005524,ATP binding; GO:0006952,defense response	PF00931.22:NB-ARC domain
Cs1g01890	2.05	2.89	2.49	12.34	6.96	9.32	112	150	121	639	358	484	1.97875	6.76399e-11	1.57107e-09	up	chr1	1090455	1093310	+	Cs1g01890	--	K13457 disease resistance protein RPM1 | (RefSeq) disease resistance protein RPM1-like (A)	ko04626: Plant-pathogen interaction	PREDICTED: putative disease resistance protein RGA3 [Citrus sinensis]	RecName: Full=Putative disease resistance protein RGA3; AltName: Full=Blight resistance protein B149; AltName: Full=RGA1-blb;	SubName: Full=Uncharacterized protein {ECO:0000313|EMBL:KDO36240.1}; Flags: Fragment;	Apoptotic ATPase	GO:0043531,ADP binding; GO:0005524,ATP binding; GO:0006952,defense response	PF00931.22:NB-ARC domain
Cs1g01910	3.75	2.03	4.75	2.37	2.53	2.03	273	141	308	164	174	141	-0.579004	0.11227	0.233368	false	chr1	1117125	1122338	-	Cs1g01910	--	K22683 aspartyl protease family protein [EC:3.4.23.-] | (RefSeq) aspartyl protease family protein 2 (A)	--	PREDICTED: aspartic proteinase-like protein 1 isoform X1 [Citrus sinensis]	RecName: Full=Aspartic proteinase-like protein 1; EC=3.4.23.-; Flags: Precursor;	SubName: Full=Uncharacterized protein {ECO:0000313|EMBL:ESR41371.1};	Aspartyl protease	GO:0031225,anchored component of membrane; GO:0046658,anchored component of plasma membrane; GO:0004190,aspartic-type endopeptidase activity; GO:0030163,protein catabolic process; GO:0006508,proteolysis	PF14543.6:Xylanase inhibitor N-terminal
Cs1g01920	20.73	18.88	29.08	12.55	17.29	15.47	2912	2525	3637	1673	2290	2069	-0.576973	0.0152501	0.0505128	false	chr1	1123595	1134519	-	Cs1g01920	--	--	--	hypothetical protein CICLE_v10024684mg [Citrus clementina]	RecName: Full=Protein CELLULOSE SYNTHASE INTERACTIVE 1 {ECO:0000303|PubMed:20616083}; AltName: Full=Protein POM-POM 2 {ECO:0000303|PubMed:7743935};	SubName: Full=Uncharacterized protein {ECO:0000313|EMBL:ESR41370.1};	FOG: Armadillo/beta-catenin-like repeats	GO:0010330,cellulose synthase complex; GO:0055028,cortical microtubule; GO:0005737,cytoplasm; GO:0009898,cytoplasmic side of plasma membrane; GO:0005794,Golgi apparatus; GO:0036449,microtubule minus-end; GO:0005634,nucleus; GO:0005886,plasma membrane; GO:0009506,plasmodesma; GO:0008017,microtubule binding; GO:0051211,anisotropic cell growth; GO:0009901,anther dehiscence; GO:0030244,cellulose bios…	PF00514.23:Armadillo/beta-catenin-like repeat
Cs1g01930	2.59	2.64	2.17	2.88	2.46	3.13	166	161	124	175	149	191	0.221195	0.33299	0.50838	false	chr1	1140196	1144860	+	Cs1g01930	--	K13141 integrator complex subunit 4 | (RefSeq) protein SIEL (A)	--	hypothetical protein CICLE_v10024812mg [Citrus clementina]	RecName: Full=Protein SIEL {ECO:0000303|PubMed:21924907}; AltName: Full=Protein SHORT-ROOT INTERACTING EMBRYONIC LETHAL {ECO:0000303|PubMed:21924907};	SubName: Full=Uncharacterized protein {ECO:0000313|EMBL:ESR41369.1};	Uncharacterized conserved protein	GO:0005938,cell cortex; GO:0005768,endosome; GO:0005634,nucleus; GO:0010496,intercellular transport; GO:0090057,root radial pattern formation; GO:0034472,snRNA 3'-end processing	PF02985.22:HEAT repeat
Cs1g01940	14.91	15.55	16.48	13.6	17.35	16.59	710	705	699	615	779	752	0.0428519	0.786548	0.871917	false	chr1	1145532	1151239	-	Cs1g01940	--	K17785 mitofilin | (RefSeq) caldesmon (A)	--	PREDICTED: caldesmon isoform X2 [Citrus sinensis]	--	SubName: Full=Uncharacterized protein {ECO:0000313|EMBL:KDO43738.1};	--	GO:0016021,integral component of membrane; GO:0005743,mitochondrial inner membrane	PF09731.9:Mitochondrial inner membrane protein
Cs1g01950	5.92	6.96	6.95	5.95	6.56	7.41	375	420	392	358	392	447	0.0339529	0.847063	0.910487	false	chr1	1152025	1164236	+	Cs1g01950	--	K03021 DNA-directed RNA polymerase III subunit RPC2 [EC:2.7.7.6] | (RefSeq) DNA-directed RNA polymerase III subunit 2 (A)	ko03020: RNA polymerase	PREDICTED: DNA-directed RNA polymerase I subunit 2 isoform X1 [Citrus sinensis]	RecName: Full=DNA-directed RNA polymerase I subunit 2 {ECO:0000305}; AltName: Full=DNA-directed RNA polymerase I subunit RPA2 {ECO:0000305}; Short=DNA polymerase I subunit A2 {ECO:0000305}; EC=2.7.7.6 {ECO:0000305}; AltName: Full=Nuclear RNA polymerase A2 {ECO:0000312|EMBL:AEE31152.1};	SubName: Full=Uncharacterized protein {ECO:0000313|EMBL:GAY64509.1};	RNA polymerase I, second largest subunit	GO:0005829,cytosol; GO:0005736,RNA polymerase I complex; GO:0003677,DNA binding; GO:0003899,DNA-directed 5'-3' RNA polymerase activity; GO:0046872,metal ion binding; GO:0032549,ribonucleoside binding; GO:0009561,megagametogenesis; GO:0042254,ribosome biogenesis; GO:0006360,transcription by RNA polymerase I	PF00562.28:RNA polymerase Rpb2, domain 6
Cs1g01960	20.66	15.32	20.11	22.63	16.07	21.44	578	408	501	601	424	571	0.127724	0.602605	0.744594	false	chr1	1164757	1167790	+	Cs1g01960	--	K09140 pre-rRNA-processing protein TSR3 | (RefSeq) ribosome biogenesis protein TSR3 homolog (A)	--	hypothetical protein CISIN_1g039464mg [Citrus sinensis]	--	SubName: Full=Uncharacterized protein {ECO:0000313|EMBL:KDO43727.1};	Uncharacterized conserved protein	--	PF04034.13:Ribosome biogenesis protein, C-terminal
Cs1g01970	52.45	49.55	50.15	66.87	61.79	63.35	3794	3413	3230	4592	4215	4363	0.361887	0.00239288	0.0112396	false	chr1	1169262	1174133	+	Cs1g01970	--	K12875 apoptotic chromatin condensation inducer in the nucleus | (RefSeq) apoptotic chromatin condensation inducer in the nucleus (A)	ko03013: RNA transport; ko03015: mRNA surveillance pathway; ko03040: Spliceosome	hypothetical protein CICLE_v10025009mg [Citrus clementina]	--	SubName: Full=Uncharacterized protein {ECO:0000313|EMBL:ESR41364.1};	Acinus (induces apoptotic chromatin condensation)	GO:0003676,nucleic acid binding	PF16294.5:RNSP1-SAP18 binding (RSB) motif
Cs1g01980	139.4	128.82	161.59	92.58	116.2	111.94	2963	2607	3058	1868	2329	2265	-0.398439	0.0194502	0.0611986	false	chr1	1176751	1178694	+	Cs1g01980	--	K02908 large subunit ribosomal protein L30e | (RefSeq) 60S ribosomal protein L30 (A)	ko03010: Ribosome	hypothetical protein CICLE_v10026806mg [Citrus clementina]	RecName: Full=60S ribosomal protein L30;	SubName: Full=Uncharacterized protein {ECO:0000313|EMBL:KDO43724.1};	60S ribosomal protein L30	GO:0005840,ribosome; GO:0003735,structural constituent of ribosome; GO:0006412,translation	PF01248.26:Ribosomal protein L7Ae/L30e/S12e/Gadd45 family
Cs1g01990	47.83	50.66	44.68	55.8	52.23	58.49	707	713	588	783	728	823	0.244568	0.0904793	0.198956	false	chr1	1186232	1187952	+	Cs1g01990	--	--	--	hypothetical protein CICLE_v10027142mg [Citrus clementina]	RecName: Full=Vesicle transport protein GOT1 {ECO:0000303|PubMed:25900983}; AltName: Full=Golgi transport 1 {ECO:0000303|PubMed:25900983};	SubName: Full=Uncharacterized protein {ECO:0000313|EMBL:ESR41359.1};	Ferric reductase-like proteins	GO:0000139,Golgi membrane; GO:0016021,integral component of membrane; GO:0016192,vesicle-mediated transport	PF04178.12:Got1/Sft2-like family
Cs1g02000	3.66	3.71	3.64	3.1	4.32	3.82	204	197	181	164	227	203	0.0525319	0.800771	0.881163	false	chr1	1191117	1194936	+	Cs1g02000	--	K15559 regulator of Ty1 transposition protein 103 | (RefSeq) regulation of nuclear pre-mRNA domain-containing protein 1B (A)	--	hypothetical protein CICLE_v10027075mg [Citrus clementina]	--	SubName: Full=Uncharacterized protein {ECO:0000313|EMBL:ESR41358.1};	Regulator of nuclear mRNA	--	PF04818.13:RNA polymerase II-binding domain.
Cs1g02010	7.68	8.68	7.74	14.2	16.25	19.31	368	396	330	646	734	881	1.07224	1.12051e-08	1.96465e-07	up	chr1	1193975	1198441	-	Cs1g02010	--	K22418 11beta/17beta-hydroxysteroid dehydrogenase [EC:1.1.1.146 1.1.1.-] | (RefSeq) 11-beta-hydroxysteroid dehydrogenase 1B-like (A)	--	PREDICTED: uncharacterized oxidoreductase SSP0419 [Citrus sinensis]	RecName: Full=11-beta-hydroxysteroid dehydrogenase 1B; EC=1.1.1.146; AltName: Full=17-beta-hydroxysteroid dehydrogenase 1B; EC=1.1.1.-; AltName: Full=Hydroxysteroid dehydrogenase 1; Short=AtHSD1;	SubName: Full=Uncharacterized protein {ECO:0000313|EMBL:ESR41357.1};	1-Acyl dihydroxyacetone phosphate reductase and related dehydrogenases	GO:0016021,integral component of membrane; GO:0005811,lipid droplet; GO:0070524,11-beta-hydroxysteroid dehydrogenase (NADP+) activity; GO:0006694,steroid biosynthetic process	PF00106.25:short chain dehydrogenase
Cs1g02030	0.36	1.02	0.33	0.4	1.36	0.58	21	57	17	22	75	32	0.468717	0.501996	0.666919	false	chr1	1215913	1219193	+	Cs1g02030	--	K13420 LRR receptor-like serine/threonine-protein kinase FLS2 [EC:2.7.11.1] | (RefSeq) LRR receptor-like serine/threonine-protein kinase EFR (A)	ko04016: MAPK signaling pathway - plant; ko04626: Plant-pathogen interaction	hypothetical protein CICLE_v10027283mg, partial [Citrus clementina]	RecName: Full=Probable LRR receptor-like serine/threonine-protein kinase At3g47570; EC=2.7.11.1; Flags: Precursor;	SubName: Full=Uncharacterized protein {ECO:0000313|EMBL:ESR41356.1}; Flags: Fragment;	--	GO:0016021,integral component of membrane; GO:0005886,plasma membrane; GO:0005524,ATP binding; GO:0004674,protein serine/threonine kinase activity	PF07714.17:Protein tyrosine kinase
Cs1g02050	10.08	4.53	5.11	0.77	1.64	1.37	124	53	56	9	19	16	-2.37173	1.25795e-05	0.000120168	down	chr1	1243035	1243678	-	Cs1g02050	--	--	--	hypothetical protein POPTR_0005s08290g [Populus trichocarpa]	--	SubName: Full=Uncharacterized protein {ECO:0000313|EMBL:EEE94112.1};	--	--	PF16136.5:Putative nuclear localisation signal
Cs1g02065	12.67	10.09	7.51	12.62	9.16	8.63	182	138	96	172	124	118	0.0308536	0.924582	0.958524	false	chr1	1266527	1268137	+	Cs1g02065	--	--	--	--	--	--	--	--	--
Cs1g02080	1.93	2.26	2.04	3.82	3.73	4.05	17	19	16	32	31	34	0.924465	0.0289844	0.0841971	false	chr1	1298441	1299424	-	Cs1g02080	--	--	--	hypothetical protein CICLE_v10026696mg [Citrus clementina]	--	SubName: Full=Uncharacterized protein {ECO:0000313|EMBL:ESR41354.1};	1-Acyl dihydroxyacetone phosphate reductase and related dehydrogenases	--	PF00106.25:short chain dehydrogenase
Cs1g02100	0.72	2.56	0.44	0.58	1.76	1.46	13	44	7	10	30	25	0.0586207	0.943977	0.969462	false	chr1	1326526	1327708	+	Cs1g02100	--	K13420 LRR receptor-like serine/threonine-protein kinase FLS2 [EC:2.7.11.1] | (RefSeq) receptor kinase-like protein Xa21 isoform X1 (A)	ko04016: MAPK signaling pathway - plant; ko04626: Plant-pathogen interaction	hypothetical protein CICLE_v10027441mg, partial [Citrus clementina]	RecName: Full=Probable LRR receptor-like serine/threonine-protein kinase At3g47570; EC=2.7.11.1; Flags: Precursor;	SubName: Full=Uncharacterized protein {ECO:0000313|EMBL:ESR41352.1}; Flags: Fragment;	--	GO:0016021,integral component of membrane; GO:0005886,plasma membrane; GO:0005524,ATP binding; GO:0004674,protein serine/threonine kinase activity	PF00069.25:Protein kinase domain
Cs1g02130	10.73	10.16	7.09	5.54	3.57	3.31	51	46	30	25	16	15	-1.1456	0.0136167	0.0462436	down	chr1	1371499	1371747	-	Cs1g02130	--	--	--	hypothetical protein POPTR_0005s08290g [Populus trichocarpa]	--	SubName: Full=Uncharacterized protein {ECO:0000313|EMBL:EEE94112.1};	--	--	PF16136.5:Putative nuclear localisation signal
Cs1g02195	11.53	14.11	11.17	14.6	13.8	10.45	109	127	94	131	123	94	0.104264	0.695034	0.81009	false	chr1	1499318	1499913	-	Cs1g02195	--	--	--	--	--	--	--	--	--
Cs1g02240	1.3	2.84	1.72	8.26	7.15	11.32	39	81	46	235	202	323	2.2216	4.12372e-09	7.63165e-08	up	chr1	1532042	1533721	+	Cs1g02240	--	K17961 cytochrome P450 family 82 subfamily G polypeptide 1 [EC:1.14.-.-] | (RefSeq) cytochrome P450 82G1-like (A)	ko00904: Diterpenoid biosynthesis	PREDICTED: cytochrome P450 CYP82D47-like [Citrus sinensis]	RecName: Full=Cytochrome P450 82C4; EC=1.14.-.-;	SubName: Full=Uncharacterized protein {ECO:0000313|EMBL:GAY61471.1};	Cytochrome P450 CYP2 subfamily	GO:0016021,integral component of membrane; GO:0016020,membrane; GO:0020037,heme binding; GO:0005506,iron ion binding; GO:0004497,monooxygenase activity; GO:0016709,oxidoreductase activity, acting on paired donors, with incorporation or reduction of molecular oxygen, NAD(P)H as one donor, and incorporation of one atom of oxygen; GO:0071281,cellular response to iron ion; GO:0044550,secondary metabo…	PF00067.22:Cytochrome P450
Cs1g02250	0.13	0.77	0.37	0.84	0.99	1.23	4	22	10	24	28	35	1.29541	0.0651758	0.156703	false	chr1	1565134	1566812	+	Cs1g02250	--	K17961 cytochrome P450 family 82 subfamily G polypeptide 1 [EC:1.14.-.-] | (RefSeq) cytochrome P450 82G1-like (A)	ko00904: Diterpenoid biosynthesis	PREDICTED: cytochrome P450 CYP82D47-like [Citrus sinensis]	RecName: Full=Cytochrome P450 82C4; EC=1.14.-.-;	SubName: Full=Uncharacterized protein {ECO:0000313|EMBL:GAY61471.1};	Cytochrome P450 CYP2 subfamily	GO:0016021,integral component of membrane; GO:0016020,membrane; GO:0020037,heme binding; GO:0005506,iron ion binding; GO:0004497,monooxygenase activity; GO:0016709,oxidoreductase activity, acting on paired donors, with incorporation or reduction of molecular oxygen, NAD(P)H as one donor, and incorporation of one atom of oxygen; GO:0071281,cellular response to iron ion; GO:0044550,secondary metabo…	PF00067.22:Cytochrome P450
Cs1g02270	0.7	5.82	1.46	0.77	3.19	2.35	21	166	39	22	90	67	-0.310355	0.708397	0.820115	false	chr1	1589667	1591323	+	Cs1g02270	--	K17961 cytochrome P450 family 82 subfamily G polypeptide 1 [EC:1.14.-.-] | (RefSeq) cytochrome P450 82G1-like (A)	ko00904: Diterpenoid biosynthesis	PREDICTED: cytochrome P450 CYP82D47-like [Citrus sinensis]	RecName: Full=Cytochrome P450 82C4; EC=1.14.-.-;	SubName: Full=Uncharacterized protein {ECO:0000313|EMBL:GAY61469.1};	Cytochrome P450 CYP2 subfamily	GO:0016021,integral component of membrane; GO:0016020,membrane; GO:0020037,heme binding; GO:0005506,iron ion binding; GO:0004497,monooxygenase activity; GO:0016709,oxidoreductase activity, acting on paired donors, with incorporation or reduction of molecular oxygen, NAD(P)H as one donor, and incorporation of one atom of oxygen; GO:0071281,cellular response to iron ion; GO:0044550,secondary metabo…	PF00067.22:Cytochrome P450
Cs1g02280	322.19	691.39	274.6	74.42	237.73	135.79	4424	9039	3357	970	3078	1775	-1.50272	0.00216222	0.0103084	down	chr1	1593848	1594566	-	Cs1g02280	--	--	--	hypothetical protein CISIN_1g034692mg [Citrus sinensis]	--	SubName: Full=Uncharacterized protein {ECO:0000313|EMBL:KDO43932.1};	--	--	--
Cs1g02290	26.13	27.94	28.49	26.48	27.41	25.46	926	943	899	891	916	859	-0.0309222	0.794921	0.877116	false	chr1	1596088	1601926	-	Cs1g02290	--	--	--	hypothetical protein CICLE_v10026093mg [Citrus clementina]	--	SubName: Full=Uncharacterized protein {ECO:0000313|EMBL:ESR41341.1};	Protein involved in mRNA turnover and stability	GO:0016021,integral component of membrane; GO:0008270,zinc ion binding	PF12906.7:RING-variant domain
Cs1g02295	30.2	23.56	28.41	34.67	31.74	32	801	595	671	873	794	808	0.285185	0.109254	0.228902	false	chr1	1602624	1604988	+	Cs1g02295	--	K12741 heterogeneous nuclear ribonucleoprotein A1/A3 | (RefSeq) UBP1-associated protein 2B-like (A)	ko03040: Spliceosome	hypothetical protein CICLE_v10025608mg [Citrus clementina]	RecName: Full=UBP1-associated protein 2B;	SubName: Full=Uncharacterized protein {ECO:0000313|EMBL:ESR41337.1};	FOG: RRM domain	GO:0005634,nucleus; GO:0003723,RNA binding; GO:0008219,cell death; GO:0006952,defense response; GO:0009693,ethylene biosynthetic process; GO:0010150,leaf senescence	PF00076.22:RNA recognition motif. (a.k.a. RRM, RBD, or RNP domain)
Cs1g02300	102.33	88.81	91.53	116.41	89.18	101.57	3541	2926	2820	3824	2910	3346	0.147044	0.417565	0.591632	false	chr1	1609104	1612416	-	Cs1g02300	--	--	--	--	--	--	--	--	--
Cs1g02310	21.13	16.47	19.37	42.96	30.33	28.03	772	573	630	1490	1045	975	0.857824	0.000595119	0.00351695	false	chr1	1637432	1643794	+	Cs1g02310	--	K14431 transcription factor TGA | (RefSeq) transcription factor TGA1 (A)	ko04075: Plant hormone signal transduction	hypothetical protein CICLE_v10025940mg [Citrus clementina]	RecName: Full=Transcription factor TGA1; AltName: Full=DNA-binding protein TGA1a-like protein; AltName: Full=bZIP transcription factor 47; Short=AtbZIP47;	SubName: Full=Uncharacterized protein {ECO:0000313|EMBL:KDO43925.1};	--	GO:0005634,nucleus; GO:0003700,DNA-binding transcription factor activity; GO:0043565,sequence-specific DNA binding; GO:0044212,transcription regulatory region DNA binding; GO:0042742,defense response to bacterium; GO:0006351,transcription, DNA-templated	PF14144.6:Seed dormancy control
Cs1g02320	10.73	6.79	11.81	7.86	6.93	6.61	440	265	431	306	268	258	-0.429623	0.126558	0.254569	false	chr1	1644219	1647319	-	Cs1g02320	--	K00827 alanine-glyoxylate transaminase / (R)-3-amino-2-methylpropionate-pyruvate transaminase [EC:2.6.1.44 2.6.1.40] | (RefSeq) alanine--glyoxylate aminotransferase 2 homolog 1, mitochondrial (A)	ko00250: Alanine, aspartate and glutamate metabolism; ko00260: Glycine, serine and threonine metabolism; ko00270: Cysteine and methionine metabolism; ko00280: Valine, leucine and isoleucine degradation	hypothetical protein CICLE_v10025514mg [Citrus clementina]	RecName: Full=Alanine--glyoxylate aminotransferase 2 homolog 1, mitochondrial; EC=2.6.1.44; AltName: Full=Beta-alanine-pyruvate aminotransferase 1; Flags: Precursor;	SubName: Full=Uncharacterized protein {ECO:0000313|EMBL:ESR41331.1};	Alanine-glyoxylate aminotransferase AGT2	GO:0016020,membrane; GO:0005739,mitochondrion; GO:0005774,vacuolar membrane; GO:0008453,alanine-glyoxylate transaminase activity; GO:0042802,identical protein binding; GO:0030170,pyridoxal phosphate binding; GO:0008270,zinc ion binding; GO:0009853,photorespiration; GO:0046686,response to cadmium ion	PF00202.21:Aminotransferase class-III
Cs1g02350	4.27	10.68	4.94	10.45	9.19	8.05	34	81	35	79	69	61	0.509729	0.263972	0.432703	false	chr1	1658636	1659052	+	Cs1g02350	--	--	--	hypothetical protein CICLE_v10027255mg [Citrus clementina]	--	SubName: Full=Uncharacterized protein {ECO:0000313|EMBL:ESR41328.1};	--	--	--
Cs1g02370	14.12	9.19	17.9	7.77	14.62	14.58	597	370	674	312	583	587	-0.136718	0.705951	0.818614	false	chr1	1663791	1668286	-	Cs1g02370	--	K18592 gamma-glutamyltranspeptidase / glutathione hydrolase / leukotriene-C4 hydrolase [EC:2.3.2.2 3.4.19.13 3.4.19.14] | (RefSeq) gamma-glutamyltranspeptidase 1-like (A)	ko00430: Taurine and hypotaurine metabolism; ko00460: Cyanoamino acid metabolism; ko00480: Glutathione metabolism; ko00590: Arachidonic acid metabolism	hypothetical protein CICLE_v10025225mg [Citrus clementina]	RecName: Full=Glutathione hydrolase 1; EC=3.4.19.13; AltName: Full=Gamma-glutamyltransferase 1; AltName: Full=Gamma-glutamyltranspeptidase 1; EC=2.3.2.2; Flags: Precursor;	SubName: Full=Uncharacterized protein {ECO:0000313|EMBL:ESR41326.1};	Gamma-glutamyltransferase	GO:0048046,apoplast; GO:0009505,plant-type cell wall; GO:0009506,plasmodesma; GO:0016756,glutathione gamma-glutamylcysteinyltransferase activity; GO:0036374,glutathione hydrolase activity; GO:0102953,hypoglycin A gamma-glutamyl transpeptidase activity; GO:0103068,leukotriene C4 gamma-glutamyl transferase activity; GO:0006751,glutathione catabolic process; GO:0006979,response to oxidative stress	PF01019.21:Gamma-glutamyltranspeptidase
Cs1g02440	18.36	15.29	19.35	5.31	10.72	6.9	928	736	871	255	511	332	-1.19017	6.20993e-05	0.000494498	down	chr1	1745185	1747831	+	Cs1g02440	--	--	--	hypothetical protein CICLE_v10027546mg [Citrus clementina]	--	SubName: Full=Uncharacterized protein {ECO:0000313|EMBL:ESR41320.1};	--	GO:0016021,integral component of membrane	PF13968.6:Domain of unknown function (DUF4220)
Cs1g02450	13.72	15.32	22.31	2.24	12.73	6.88	239	254	346	37	209	114	-1.21878	0.0322383	0.0913167	false	chr1	1748847	1750289	-	Cs1g02450	--	--	--	PREDICTED: uncharacterized protein LOC102620478 [Citrus sinensis]	--	--	--	--	PF04102.12:SlyX
Cs1g02460	2.15	2.08	5.22	0.86	2.05	1.58	100	92	216	38	90	70	-1.04948	0.0423869	0.113017	false	chr1	1757354	1763102	+	Cs1g02460	--	--	--	PREDICTED: ankyrin repeat-containing protein At5g02620-like isoform X1 [Citrus sinensis]	--	SubName: Full=Uncharacterized protein {ECO:0000313|EMBL:GAY68599.1}; Flags: Fragment;	FOG: Ankyrin repeat	--	PF13962.6:Domain of unknown function
Cs1g02520	7.84	8.7	7.74	3.26	5.57	5.31	124	131	109	49	83	80	-0.756767	0.0118198	0.0414062	false	chr1	1841892	1844244	+	Cs1g02520	--	--	--	hypothetical protein CICLE_v10026392mg [Citrus clementina]	--	SubName: Full=Uncharacterized protein {ECO:0000313|EMBL:ESR41313.1};	--	--	PF10512.9:Cell division cycle-associated protein 8
Cs1g02530	0.88	0.62	0.64	3.11	2.93	3.1	34	23	22	114	107	114	2.11277	2.61305e-11	6.33259e-10	up	chr1	1845137	1847952	-	Cs1g02530	--	K17710 pentatricopeptide repeat domain-containing protein 1 | (RefSeq) pentatricopeptide repeat-containing protein At2g18940, chloroplastic (A)	--	hypothetical protein CICLE_v10025440mg [Citrus clementina]	RecName: Full=Pentatricopeptide repeat-containing protein At4g39620, chloroplastic {ECO:0000305}; AltName: Full=Protein EMBRYO DEFECTIVE 2453 {ECO:0000303|PubMed:15647901}; Flags: Precursor;	SubName: Full=Uncharacterized protein {ECO:0000313|EMBL:ESR41312.1};	FOG: PPR repeat	GO:0009507,chloroplast; GO:0043231,intracellular membrane-bounded organelle; GO:0004519,endonuclease activity; GO:0003723,RNA binding; GO:0009793,embryo development ending in seed dormancy; GO:0009451,RNA modification	PF13041.6:PPR repeat family
Cs1g02540	0	0	0	45.69	37.84	65.4	0	0	0	1240	1020	1780	12.8624	5.51364e-26	4.25291e-24	up	chr1	1851439	1853634	+	Cs1g02540	--	K20562 biphenyl-4-hydroxylase | (RefSeq) cytochrome P450 CYP736A12-like (A)	--	hypothetical protein CICLE_v10027549mg [Citrus clementina]	RecName: Full=Cytochrome P450 CYP736A12; EC=1.14.-.-;	SubName: Full=Uncharacterized protein {ECO:0000313|EMBL:ESR41311.1};	Cytochrome P450 CYP2 subfamily	GO:0016021,integral component of membrane; GO:0020037,heme binding; GO:0005506,iron ion binding; GO:0004497,monooxygenase activity; GO:0016705,oxidoreductase activity, acting on paired donors, with incorporation or reduction of molecular oxygen	PF00067.22:Cytochrome P450
Cs1g02550	0.05	0	0.06	29.41	23.5	29.96	1	0	1	514	408	525	9.52462	1.2659e-19	6.4774e-18	up	chr1	1859078	1860041	+	Cs1g02550	--	K20562 biphenyl-4-hydroxylase | (RefSeq) cytochrome P450 CYP736A12-like (A)	--	PREDICTED: cytochrome P450 CYP736A12-like [Citrus sinensis]	RecName: Full=Cytochrome P450 CYP736A12; EC=1.14.-.-;	SubName: Full=Uncharacterized protein {ECO:0000313|EMBL:GAY61446.1};	Cytochrome P450 CYP2 subfamily	GO:0016021,integral component of membrane; GO:0020037,heme binding; GO:0005506,iron ion binding; GO:0004497,monooxygenase activity; GO:0016705,oxidoreductase activity, acting on paired donors, with incorporation or reduction of molecular oxygen	PF00067.22:Cytochrome P450
Cs1g02580	5.3	2.93	4	1.66	3.07	2.14	198	104	133	59	108	76	-0.815962	0.0303588	0.087212	false	chr1	1893603	1895771	-	Cs1g02580	--	K13422 transcription factor MYC2 | (RefSeq) transcription factor MYC2-like (A)	ko04016: MAPK signaling pathway - plant; ko04075: Plant hormone signal transduction	hypothetical protein CICLE_v10019669mg [Citrus clementina]	RecName: Full=Transcription factor bHLH91; AltName: Full=Basic helix-loop-helix protein 91; Short=AtbHLH91; Short=bHLH 91; AltName: Full=Transcription factor EN 25; AltName: Full=bHLH transcription factor bHLH091;	SubName: Full=Uncharacterized protein {ECO:0000313|EMBL:ESR58766.1};	--	GO:0005634,nucleus; GO:0003677,DNA binding; GO:0003700,DNA-binding transcription factor activity; GO:0046983,protein dimerization activity; GO:0048658,anther wall tapetum development; GO:0052543,callose deposition in cell wall; GO:0009555,pollen development; GO:0006355,regulation of transcription, DNA-templated; GO:0006351,transcription, DNA-templated	PF00010.26:Helix-loop-helix DNA-binding domain
Cs1g02590	1.17	1.59	1.37	0.75	0.93	0.94	72	93	75	44	54	55	-0.626636	0.0351113	0.0977292	false	chr1	1899256	1904335	-	Cs1g02590	--	K22733 magnesium transporter | (RefSeq) uncharacterized protein LOC102612526 (A)	--	PREDICTED: pentatricopeptide repeat-containing protein At1g08070, chloroplastic [Citrus sinensis]	RecName: Full=Pentatricopeptide repeat-containing protein At1g08070, chloroplastic {ECO:0000305}; AltName: Full=Protein ORGANELLE TRANSCRIPT PROCESSING 82 {ECO:0000303|PubMed:19845878}; Flags: Precursor;	SubName: Full=Uncharacterized protein {ECO:0000313|EMBL:GAY57930.1};	FOG: PPR repeat	GO:0009507,chloroplast; GO:0004519,endonuclease activity; GO:0003723,RNA binding; GO:0008270,zinc ion binding; GO:1900865,chloroplast RNA modification; GO:0031425,chloroplast RNA processing; GO:0006397,mRNA processing	PF13041.6:PPR repeat family
Cs1g02600	8.68	10.24	8.28	9.66	8.58	8.41	604	678	513	638	563	557	-0.00163889	0.992335	0.996004	false	chr1	1903157	1909287	+	Cs1g02600	--	K14006 protein transport protein SEC23 | (RefSeq) protein transport protein SEC23 (A)	ko04141: Protein processing in endoplasmic reticulum	PREDICTED: protein transport protein SEC23 [Citrus sinensis]	RecName: Full=Protein transport protein Sec24-like At3g07100;	SubName: Full=Uncharacterized protein {ECO:0000313|EMBL:KDO85348.1};	Vesicle coat complex COPII, subunit SEC23	GO:0030127,COPII vesicle coat; GO:0005789,endoplasmic reticulum membrane; GO:0033116,endoplasmic reticulum-Golgi intermediate compartment membrane; GO:0000139,Golgi membrane; GO:0008270,zinc ion binding; GO:0007029,endoplasmic reticulum organization; GO:0080119,ER body organization; GO:0006888,ER to Golgi vesicle-mediated transport; GO:0007030,Golgi organization; GO:0006886,intracellular protein …	PF04811.15:Sec23/Sec24 trunk domain
Cs1g02610	1.26	2.31	1.59	23.69	16.51	18	8	14	9	143	99	109	3.52866	1.89298e-16	7.24662e-15	up	chr1	1910104	1910565	-	Cs1g02610	--	--	--	--	--	--	--	--	--
Cs1g02620	0	0.02	0	38.46	39.34	62.95	0	1	0	1554	1579	2551	12.3918	2.59765e-24	1.80196e-22	up	chr1	1911901	1916575	-	Cs1g02620	--	K10756 replication factor C subunit 3/5 | (RefSeq) uncharacterized LOC102625196 (A)	ko03030: DNA replication; ko03420: Nucleotide excision repair; ko03430: Mismatch repair	hypothetical protein CICLE_v10024044mg [Citrus clementina]	RecName: Full=Replication factor C subunit 3; Short=AtRFC3; AltName: Full=Activator 1 subunit 3; AltName: Full=Protein EMBRYO DEFECTIVE 161; AltName: Full=Protein EMBRYO DEFECTIVE 251; AltName: Full=Protein EMBRYO DEFECTIVE 2775;	SubName: Full=Uncharacterized protein {ECO:0000313|EMBL:ESR58763.1};	Replication factor C, subunit RFC3	GO:0005663,DNA replication factor C complex; GO:0005634,nucleus; GO:0005524,ATP binding; GO:0003677,DNA binding; GO:0006281,DNA repair; GO:0006261,DNA-dependent DNA replication	PF13191.6:AAA ATPase domain
Cs1g02650	47.85	48.58	52.48	50.69	45.96	44.46	1230	1189	1201	1237	1114	1088	-0.0504745	0.714654	0.82491	false	chr1	1937703	1940815	-	Cs1g02650	--	K13484 5-hydroxyisourate hydrolase / 2-oxo-4-hydroxy-4-carboxy-5-ureidoimidazoline decarboxylase [EC:3.5.2.17 4.1.1.97] | (RefSeq) uric acid degradation bifunctional protein TTL (A)	ko00230: Purine metabolism	PREDICTED: uric acid degradation bifunctional protein TTL isoform X1 [Citrus sinensis]	RecName: Full=Uric acid degradation bifunctional protein TTL; AltName: Full=Transthyretin-like protein; Includes: RecName: Full=2-oxo-4-hydroxy-4-carboxy-5-ureidoimidazoline decarboxylase; Short=OHCU decarboxylase; EC=4.1.1.97; Includes: RecName: Full=5-hydroxyisourate hydrolase; Short=HIU hydrolase; Short=HIUHase; EC=3.5.2.17;	SubName: Full=Uncharacterized protein {ECO:0000313|EMBL:KDO85358.1};	Transthyretin and related proteins	GO:0005829,cytosol; GO:0031234,extrinsic component of cytoplasmic side of plasma membrane; GO:0005777,peroxisome; GO:0051997,2-oxo-4-hydroxy-4-carboxy-5-ureidoimidazoline decarboxylase activity; GO:0033971,hydroxyisourate hydrolase activity; GO:0019428,allantoin biosynthetic process; GO:0009742,brassinosteroid mediated signaling pathway; GO:0051289,protein homotetramerization; GO:0006144,purine n…	PF00576.21:HIUase/Transthyretin family
Cs1g02660	24.74	25.66	26.15	22.19	24.69	23.66	947	935	891	806	891	862	-0.0926169	0.432589	0.605723	false	chr1	1942090	1947946	+	Cs1g02660	--	K05605 3-hydroxyisobutyryl-CoA hydrolase [EC:3.1.2.4] | (RefSeq) 3-hydroxyisobutyryl-CoA hydrolase 1 (A)	ko00280: Valine, leucine and isoleucine degradation; ko00410: beta-Alanine metabolism; ko00640: Propanoate metabolism; ko01200: Carbon metabolism	PREDICTED: 3-hydroxyisobutyryl-CoA hydrolase 1 isoform X1 [Citrus sinensis]	RecName: Full=3-hydroxyisobutyryl-CoA hydrolase 1; EC=3.1.2.-; EC=3.1.2.4; AltName: Full=CoA-thioester hydrolase CHY1;	SubName: Full=Uncharacterized protein {ECO:0000313|EMBL:KDO85359.1};	--	GO:0005777,peroxisome; GO:0003860,3-hydroxyisobutyryl-CoA hydrolase activity; GO:0009409,response to cold; GO:0006574,valine catabolic process	PF16113.5:Enoyl-CoA hydratase/isomerase
Cs1g02670	13.54	9.3	12.78	15.48	15.04	15.27	531	347	446	576	556	570	0.386193	0.0735614	0.17065	false	chr1	1951609	1955510	-	Cs1g02670	--	K04123 ent-kaurenoic acid hydroxylase [EC:1.14.13.79] | (RefSeq) ent-kaurenoic acid oxidase 2-like (A)	ko00904: Diterpenoid biosynthesis	PREDICTED: ent-kaurenoic acid oxidase 2-like [Citrus sinensis]	RecName: Full=Ent-kaurenoic acid oxidase 2; Short=AtKAO2; EC=1.14.13.79; AltName: Full=Cytochrome P450 88A4;	SubName: Full=Uncharacterized protein {ECO:0000313|EMBL:KDO85362.1};	Cytochrome P450 CYP4/CYP19/CYP26 subfamilies	GO:0005783,endoplasmic reticulum; GO:0005789,endoplasmic reticulum membrane; GO:0016021,integral component of membrane; GO:0051777,ent-kaurenoate oxidase activity; GO:0020037,heme binding; GO:0005506,iron ion binding; GO:0016132,brassinosteroid biosynthetic process; GO:0010268,brassinosteroid homeostasis; GO:0009686,gibberellin biosynthetic process; GO:0007275,multicellular organism development; …	PF00067.22:Cytochrome P450
Cs1g02675	71.64	139.62	72.88	63.15	63.5	56.96	1115	2069	1010	933	932	844	-0.599431	0.0495329	0.127654	false	chr1	1960496	1962681	-	Cs1g02675	--	--	--	hypothetical protein CUMW_183120 [Citrus unshiu]	--	SubName: Full=Uncharacterized protein {ECO:0000313|EMBL:GAY57921.1};	--	--	--
Cs1g02680	18.78	18.25	18.6	15.71	14.88	13.91	854	790	753	678	638	602	-0.29621	0.0294854	0.0853315	false	chr1	1967848	1972545	-	Cs1g02680	--	K14500 BR-signaling kinase [EC:2.7.11.1] | (RefSeq) probable serine/threonine-protein kinase At4g35230 (A)	ko04075: Plant hormone signal transduction	PREDICTED: probable serine/threonine-protein kinase At4g35230 isoform X2 [Citrus sinensis]	RecName: Full=Serine/threonine-protein kinase BSK2 {ECO:0000305}; EC=2.7.11.1 {ECO:0000305}; AltName: Full=Brassinosteroid-signaling kinase 2 {ECO:0000303|PubMed:18653891};	SubName: Full=Uncharacterized protein {ECO:0000313|EMBL:KDO85367.1};	--	GO:0005886,plasma membrane; GO:0005524,ATP binding; GO:0004675,transmembrane receptor protein serine/threonine kinase activity; GO:0009742,brassinosteroid mediated signaling pathway; GO:0007166,cell surface receptor signaling pathway; GO:0006468,protein phosphorylation	PF07714.17:Protein tyrosine kinase
Cs1g02690	3.57	6	13.11	16.36	9.27	12.08	146	234	478	636	358	471	0.769987	0.118543	0.242529	false	chr1	1983312	1987807	+	Cs1g02690	--	K14638 solute carrier family 15 (peptide/histidine transporter), member 3/4 | (RefSeq) protein NRT1/ PTR FAMILY 7.3 (A)	--	PREDICTED: protein NRT1/ PTR FAMILY 7.2 [Citrus sinensis]	RecName: Full=Protein NRT1/ PTR FAMILY 7.3; Short=AtNPF7.3; AltName: Full=Nitrate transporter 1.5;	SubName: Full=Uncharacterized protein {ECO:0000313|EMBL:KDO85368.1};	H+/oligopeptide symporter	GO:0016021,integral component of membrane; GO:0005886,plasma membrane; GO:0015112,nitrate transmembrane transporter activity; GO:0015386,potassium:proton antiporter activity; GO:0015293,symporter activity; GO:1902600,proton transmembrane transport; GO:0010150,leaf senescence; GO:0015706,nitrate transport; GO:0055075,potassium ion homeostasis; GO:0010167,response to nitrate	PF00854.21:POT family
Cs1g02700	16.94	15.6	15.19	23.6	16.83	18.07	904	793	722	1196	847	918	0.321423	0.122407	0.248412	false	chr1	1988062	1992095	+	Cs1g02700	--	K09008 NADH dehydrogenase [ubiquinone] 1 alpha subcomplex assembly factor 3 | (RefSeq) uncharacterized LOC102631083 (A)	--	hypothetical protein CICLE_v10022551mg [Citrus clementina]	--	SubName: Full=Uncharacterized protein {ECO:0000313|EMBL:GAY57916.1};	Uncharacterized conserved nuclear protein	--	PF04430.14:Protein of unknown function (DUF498/DUF598)
Cs1g02710	10.88	10.89	10.61	19.23	18.31	18.85	1119	1067	972	1878	1777	1846	0.826662	5.43751e-13	1.57209e-11	false	chr1	1992983	2000156	-	Cs1g02710	--	K05666 ATP-binding cassette, subfamily C (CFTR/MRP), member 2 | (RefSeq) ABC transporter C family member 3-like (A)	ko02010: ABC transporters	PREDICTED: putative ABC transporter C family member 15 [Citrus sinensis]	RecName: Full=ABC transporter C family member 9; Short=ABC transporter ABCC.9; Short=AtABCC9; EC=3.6.3.44; AltName: Full=ATP-energized glutathione S-conjugate pump 9; AltName: Full=Glutathione S-conjugate-transporting ATPase 9; AltName: Full=Multidrug resistance-associated protein 9;	SubName: Full=Uncharacterized protein {ECO:0000313|EMBL:GAY57915.1};	Multidrug resistance-associated protein/mitoxantrone resistance protein, ABC superfamily	GO:0016021,integral component of membrane; GO:0000325,plant-type vacuole; GO:0009506,plasmodesma; GO:0005774,vacuolar membrane; GO:0005524,ATP binding; GO:0042626,ATPase activity, coupled to transmembrane movement of substances; GO:0008559,xenobiotic transmembrane transporting ATPase activity; GO:0009624,response to nematode; GO:0055085,transmembrane transport	PF00664.23:ABC transporter transmembrane region
Cs1g02720	0.75	0.9	0.76	2.56	2.7	2.83	20	23	18	65	68	72	1.77405	3.48001e-07	4.66227e-06	up	chr1	2008077	2010477	-	Cs1g02720	--	K01179 endoglucanase [EC:3.2.1.4] | (RefSeq) endoglucanase 12-like (A)	ko00500: Starch and sucrose metabolism	hypothetical protein CUMW_183060, partial [Citrus unshiu]	RecName: Full=Endoglucanase 12; EC=3.2.1.4; AltName: Full=Endo-1,4-beta glucanase 12; Flags: Precursor;	SubName: Full=Uncharacterized protein {ECO:0000313|EMBL:GAY57914.1}; Flags: Fragment;	--	GO:0005576,extracellular region; GO:0008810,cellulase activity; GO:0071555,cell wall organization; GO:0030245,cellulose catabolic process	PF00759.19:Glycosyl hydrolase family 9
Cs1g02730	4.17	4.27	5.1	4.16	4.51	4.47	324	316	353	307	331	331	-0.0154735	0.928379	0.960616	false	chr1	2014391	2026176	-	Cs1g02730	--	K10742 DNA replication ATP-dependent helicase Dna2 [EC:3.6.4.12] | (RefSeq) DNA replication ATP-dependent helicase/nuclease DNA2 (A)	ko03030: DNA replication	PREDICTED: DNA replication ATP-dependent helicase/nuclease DNA2 isoform X4 [Citrus sinensis]	RecName: Full=Regulator of nonsense transcripts 1 homolog; EC=3.6.4.-; AltName: Full=ATP-dependent helicase UPF1;	SubName: Full=Uncharacterized protein {ECO:0000313|EMBL:GAY57913.1};	DNA replication helicase	GO:0005737,cytoplasm; GO:0005829,cytosol; GO:0000932,P-body; GO:0005886,plasma membrane; GO:0009506,plasmodesma; GO:0005524,ATP binding; GO:0003677,DNA binding; GO:0004386,helicase activity; GO:0003729,mRNA binding; GO:0008270,zinc ion binding; GO:0042742,defense response to bacterium; GO:0009867,jasmonic acid mediated signaling pathway; GO:0048571,long-day photoperiodism; GO:0000184,nuclear-tran…	PF08696.11:DNA replication factor Dna2
Cs1g02740	1.85	0.97	2.08	3.7	2.3	2.55	58	29	58	110	68	76	0.829871	0.0546415	0.137385	false	chr1	2027276	2029851	-	Cs1g02740	--	K11271 sister chromatid cohesion protein DCC1 | (RefSeq) sister chromatid cohesion protein DCC1 (A)	--	hypothetical protein CICLE_v10020482mg [Citrus clementina]	--	SubName: Full=Uncharacterized protein {ECO:0000313|EMBL:GAY57912.1};	Uncharacterized conserved protein	--	PF09724.9:Sister chromatid cohesion protein Dcc1
Cs1g02760	0.81	1.19	1.89	0.22	0.36	0.2	38	53	79	10	16	9	-2.27588	3.03887e-05	0.000263505	down	chr1	2042599	2047030	+	Cs1g02760	--	K15404 aldehyde decarbonylase [EC:4.1.99.5] | (RefSeq) protein ECERIFERUM 1 (A)	ko00073: Cutin, suberine and wax biosynthesis	PREDICTED: protein ECERIFERUM 1 isoform X1 [Citrus sinensis]	RecName: Full=Protein ECERIFERUM 1;	SubName: Full=Uncharacterized protein {ECO:0000313|EMBL:KDO85380.1};	--	GO:0005789,endoplasmic reticulum membrane; GO:0016021,integral component of membrane; GO:0005506,iron ion binding; GO:0016491,oxidoreductase activity; GO:0043447,alkane biosynthetic process; GO:0042742,defense response to bacterium; GO:0050832,defense response to fungus; GO:0008610,lipid biosynthetic process; GO:0006629,lipid metabolic process; GO:0009414,response to water deprivation; GO:0010025…	PF12076.8:WAX2 C-terminal domain
Cs1g02770	180.94	157.64	150.18	183.05	176.99	184.06	8953	7427	6616	8598	8258	8670	0.179677	0.210588	0.367149	false	chr1	2050597	2055402	-	Cs1g02770	--	K13800 UMP-CMP kinase [EC:2.7.4.14] | (RefSeq) UMP-CMP kinase 3 (A)	ko00240: Pyrimidine metabolism	hypothetical protein CICLE_v10024291mg [Citrus clementina]	RecName: Full=UMP-CMP kinase 3 {ECO:0000255|HAMAP-Rule:MF_03172}; EC=2.7.4.14 {ECO:0000255|HAMAP-Rule:MF_03172}; AltName: Full=Deoxycytidylate kinase {ECO:0000255|HAMAP-Rule:MF_03172}; Short=CK {ECO:0000255|HAMAP-Rule:MF_03172}; Short=dCMP kinase {ECO:0000255|HAMAP-Rule:MF_03172}; AltName: Full=Uridine monophosphate/cytidine monophosphate kinase {ECO:0000255|HAMAP-Rule:MF_03172}; Short=UMP/CMP ki…	RecName: Full=UMP-CMP kinase {ECO:0000256|HAMAP-Rule:MF_03172}; EC=2.7.4.14 {ECO:0000256|HAMAP-Rule:MF_03172}; AltName: Full=Deoxycytidylate kinase {ECO:0000256|HAMAP-Rule:MF_03172}; Short=CK {ECO:0000256|HAMAP-Rule:MF_03172}; Short=dCMP kinase {ECO:0000256|HAMAP-Rule:MF_03172}; AltName: Full=Uridine monophosphate/cytidine monophosphate kinase {ECO:0000256|HAMAP-Rule:MF_03172}; Short=UMP/CMP kina…	Uridylate kinase/adenylate kinase	GO:0048046,apoplast; GO:0005829,cytosol; GO:0005634,nucleus; GO:0005524,ATP binding; GO:0004127,cytidylate kinase activity; GO:0009041,uridylate kinase activity; GO:0006207,'de novo' pyrimidine nucleobase biosynthetic process; GO:0006221,pyrimidine nucleotide biosynthetic process; GO:0009173,pyrimidine ribonucleoside monophosphate metabolic process	PF00406.22:Adenylate kinase
Cs1g02780	7.34	6.62	7.02	8.4	7.91	7.22	412	354	351	448	419	386	0.191467	0.244912	0.410076	false	chr1	2057869	2062995	-	Cs1g02780	--	K06943 nucleolar GTP-binding protein | (RefSeq) nucleolar GTP-binding protein 1 (A)	ko03008: Ribosome biogenesis in eukaryotes	PREDICTED: nucleolar GTP-binding protein 1 isoform X1 [Citrus sinensis]	RecName: Full=Nucleolar GTP-binding protein 1;	SubName: Full=Uncharacterized protein {ECO:0000313|EMBL:GAY57895.1};	GTP-binding protein CRFG/NOG1 (ODN superfamily)	GO:0016020,membrane; GO:0005730,nucleolus; GO:0005525,GTP binding; GO:0042254,ribosome biogenesis	PF17835.1:NOG1 N-terminal helical domain
Cs1g02800	86.73	67.76	73.53	105.99	96.67	88.47	4467	3323	3372	5182	4695	4338	0.377066	0.0348618	0.0971637	false	chr1	2064001	2068782	-	Cs1g02800	--	K17065 dynamin 1-like protein [EC:3.6.5.5] | (RefSeq) dynamin-related protein 3A-like (A)	--	hypothetical protein CICLE_v10019323mg [Citrus clementina]	RecName: Full=Dynamin-related protein 1E; AltName: Full=Dynamin-like protein 4; AltName: Full=Dynamin-like protein DLP2; AltName: Full=Dynamin-like protein E;	SubName: Full=Uncharacterized protein {ECO:0000313|EMBL:ESR58728.1};	Vacuolar sorting protein VPS1, dynamin, and related proteins	GO:0005874,microtubule; GO:0005739,mitochondrion; GO:0009524,phragmoplast; GO:0005886,plasma membrane; GO:0009506,plasmodesma; GO:0005774,vacuolar membrane; GO:0005773,vacuole; GO:0005525,GTP binding; GO:0003924,GTPase activity; GO:0008017,microtubule binding; GO:0007049,cell cycle; GO:0051301,cell division; GO:0050832,defense response to fungus; GO:0000266,mitochondrial fission; GO:0046686,respo…	PF01031.20:Dynamin central region
Cs1g02810	41.24	34.26	46.97	35.79	34.81	36.74	1646	1302	1669	1356	1310	1396	-0.16473	0.360115	0.534714	false	chr1	2070195	2079178	-	Cs1g02810	--	K00028 malate dehydrogenase (decarboxylating) [EC:1.1.1.39] | (RefSeq) NAD-dependent malic enzyme 62 kDa isoform, mitochondrial (A)	ko00620: Pyruvate metabolism; ko00710: Carbon fixation in photosynthetic organisms; ko01200: Carbon metabolism	hypothetical protein CICLE_v10024268mg [Citrus clementina]	RecName: Full=NAD-dependent malic enzyme 62 kDa isoform, mitochondrial; Short=NAD-ME; EC=1.1.1.39; Flags: Precursor;	RecName: Full=Malic enzyme {ECO:0000256|RuleBase:RU003426};	NADP+-dependent malic enzyme	GO:0005759,mitochondrial matrix; GO:0004471,malate dehydrogenase (decarboxylating) (NAD+) activity; GO:0046872,metal ion binding; GO:0051287,NAD binding	PF03949.15:Malic enzyme, NAD binding domain
Cs1g02820	8.37	4.48	8.37	8.46	6.18	6.74	300	153	267	288	209	230	0.0366327	0.912969	0.951974	false	chr1	2086841	2088717	+	Cs1g02820	--	--	--	PREDICTED: uncharacterized protein LOC102613485 [Citrus sinensis]	--	SubName: Full=Uncharacterized protein {ECO:0000313|EMBL:KDO85408.1};	--	--	PF05340.12:Protein of unknown function (DUF740)
Cs1g02830	13.04	11.96	17.72	15.69	17.29	18.01	324	283	392	370	405	426	0.281194	0.209143	0.365567	false	chr1	2110296	2111596	-	Cs1g02830	--	--	--	hypothetical protein CICLE_v10020615mg [Citrus clementina]	RecName: Full=Probable purine permease 11; Short=AtPUP11;	SubName: Full=Uncharacterized protein {ECO:0000313|EMBL:ESR58724.1};	--	GO:0016021,integral component of membrane; GO:0016020,membrane; GO:0005345,purine nucleobase transmembrane transporter activity; GO:0006863,purine nucleobase transport	PF16913.5:Purine nucleobase transmembrane transport
Cs1g02840	39.4	52.48	39.66	35.65	38.97	41.39	1100	1395	986	945	1026	1100	-0.153966	0.396263	0.570283	false	chr1	2114720	2117524	-	Cs1g02840	--	K07893 Ras-related protein Rab-6A | (RefSeq) ras-related protein RABH1b (A)	--	hypothetical protein CICLE_v10022269mg [Citrus clementina]	RecName: Full=Ras-related protein RABH1b; Short=AtRABH1b; AltName: Full=Ras-related protein Rab6A; Short=AtRab6A;	SubName: Full=Uncharacterized protein {ECO:0000313|EMBL:GAY57889.1};	GTPase Rab6/YPT6/Ryh1, small G protein superfamily	GO:0005829,cytosol; GO:0005768,endosome; GO:0005794,Golgi apparatus; GO:0000139,Golgi membrane; GO:0016020,membrane; GO:0005886,plasma membrane; GO:0009506,plasmodesma; GO:0005802,trans-Golgi network; GO:0005774,vacuolar membrane; GO:0005525,GTP binding; GO:0003924,GTPase activity; GO:0006891,intra-Golgi vesicle-mediated transport; GO:0015031,protein transport; GO:0042147,retrograde transport, en…	PF00071.22:Ras family
Cs1g02850	44.25	47.12	53.16	44.02	42.3	38.73	791	802	846	747	713	659	-0.181709	0.235811	0.398682	false	chr1	2119433	2121191	+	Cs1g02850	--	K03955 NADH dehydrogenase (ubiquinone) 1 alpha/beta subcomplex 1 | (RefSeq) acyl carrier protein 1, mitochondrial (A)	ko00190: Oxidative phosphorylation	hypothetical protein CICLE_v10022877mg [Citrus clementina]	RecName: Full=Acyl carrier protein 1, mitochondrial; AltName: Full=MtACP-1; Short=ACP; AltName: Full=NADH-ubiquinone oxidoreductase 9.6 kDa subunit; Flags: Precursor;	SubName: Full=Uncharacterized protein {ECO:0000313|EMBL:GAY57888.1};	Acyl carrier protein/NADH-ubiquinone oxidoreductase, NDUFAB1/SDAP subunit	GO:0005829,cytosol; GO:0005759,mitochondrial matrix; GO:0005739,mitochondrion; GO:0070469,respiratory chain; GO:0000035,acyl binding; GO:0000036,acyl carrier activity; GO:0031177,phosphopantetheine binding; GO:0006633,fatty acid biosynthetic process; GO:0009245,lipid A biosynthetic process; GO:0055114,oxidation-reduction process	PF00550.25:Phosphopantetheine attachment site
Cs1g02860	7.71	7.72	7.68	8.04	7.23	8.12	303	289	269	300	268	304	0.0439891	0.790303	0.874376	false	chr1	2124369	2128184	+	Cs1g02860	--	--	--	PREDICTED: protein TRIGALACTOSYLDIACYLGLYCEROL 4, chloroplastic [Citrus sinensis]	RecName: Full=Protein TRIGALACTOSYLDIACYLGLYCEROL 4, chloroplastic {ECO:0000303|PubMed:18689504}; AltName: Full=Protein PIGMENT DEFECTIVE 320;	SubName: Full=Uncharacterized protein {ECO:0000313|EMBL:KDO85417.1};	--	GO:0009507,chloroplast; GO:0009941,chloroplast envelope; GO:0009707,chloroplast outer membrane; GO:0005783,endoplasmic reticulum; GO:0016021,integral component of membrane; GO:0016020,membrane; GO:0009536,plastid; GO:0070300,phosphatidic acid binding; GO:0042803,protein homodimerization activity; GO:0034196,acylglycerol transport; GO:1990052,ER to chloroplast lipid transport	PF12600.8:Protein of unknown function (DUF3769)
Cs1g02870	42.71	46.04	46.95	30.04	34.18	31.53	942	967	922	629	711	662	-0.477416	0.000171407	0.00119747	false	chr1	2128552	2130911	-	Cs1g02870	--	K04078 chaperonin GroES | (RefSeq) 10 kDa chaperonin (A)	--	hypothetical protein CICLE_v10022799mg [Citrus clementina]	RecName: Full=10 kDa chaperonin 2, chloroplastic {ECO:0000305}; AltName: Full=Chloroplast chaperonin 10 {ECO:0000303|PubMed:11402030}; Short=Chl-Cpn10 {ECO:0000303|PubMed:11402030}; Flags: Precursor;	SubName: Full=Uncharacterized protein {ECO:0000313|EMBL:GAY57885.1};	Mitochondrial chaperonin	GO:0009507,chloroplast; GO:0009941,chloroplast envelope; GO:0009570,chloroplast stroma; GO:0005759,mitochondrial matrix; GO:0051087,chaperone binding; GO:0046872,metal ion binding; GO:0019904,protein domain specific binding; GO:0051082,unfolded protein binding; GO:0051085,chaperone cofactor-dependent protein refolding; GO:0006457,protein folding; GO:0006986,response to unfolded protein	PF00166.21:Chaperonin 10 Kd subunit
Cs1g02880	3.56	1.51	4.76	0.54	1.08	0.36	84	34	100	12	24	8	-2.3033	0.000305429	0.00197988	down	chr1	2134033	2136213	+	Cs1g02880	--	--	--	hypothetical protein CICLE_v10022088mg [Citrus clementina]	--	SubName: Full=Uncharacterized protein {ECO:0000313|EMBL:GAY57884.1};	--	--	--
Cs1g02890	0.71	0.14	0.71	0.17	0.29	0.37	26	5	23	6	10	13	-0.88301	0.283307	0.456044	false	chr1	2137516	2139424	-	Cs1g02890	--	K10663 E3 ubiquitin-protein ligase ATL4 [EC:2.3.2.27] | (RefSeq) E3 ubiquitin-protein ligase ATL4 (A)	--	PREDICTED: E3 ubiquitin-protein ligase ATL4 [Citrus sinensis]	RecName: Full=E3 ubiquitin-protein ligase ATL4 {ECO:0000305}; EC=2.3.2.27 {ECO:0000269|PubMed:15644464}; AltName: Full=Protein ARABIDOPSIS TOXICOS EN LEVADURA 4 {ECO:0000303|PubMed:10480382}; Short=Protein ATL4 {ECO:0000303|PubMed:10480382}; AltName: Full=RING-H2 finger X1a {ECO:0000303|PubMed:9781696}; AltName: Full=RING-H2 zinc finger protein ATL4 {ECO:0000305}; AltName: Full=RING-H2 zinc finge…	SubName: Full=Uncharacterized protein {ECO:0000313|EMBL:ESR58712.1};	FOG: Predicted E3 ubiquitin ligase	GO:0016021,integral component of membrane; GO:0046872,metal ion binding; GO:0061630,ubiquitin protein ligase activity; GO:0004842,ubiquitin-protein transferase activity; GO:0043161,proteasome-mediated ubiquitin-dependent protein catabolic process; GO:0016567,protein ubiquitination	PF13639.6:Ring finger domain
Cs1g02900	81.91	117.34	94.49	73.85	114.77	101.23	1921	2620	1973	1644	2538	2260	0.00562573	0.980842	0.990037	false	chr1	2149168	2150692	+	Cs1g02900	--	--	--	hypothetical protein CISIN_1g045147mg, partial [Citrus sinensis]	RecName: Full=Protein MARD1 {ECO:0000303|PubMed:15159630}; AltName: Full=Mediator of ABA-regulated dormancy1 {ECO:0000303|PubMed:15159630}; AltName: Full=Senescence-associated protein SAG102 {ECO:0000303|PubMed:11402199};	SubName: Full=Uncharacterized protein {ECO:0000313|EMBL:KDO85423.1}; Flags: Fragment;	--	GO:0010494,cytoplasmic stress granule; GO:0000932,P-body; GO:0046872,metal ion binding; GO:0009737,response to abscisic acid; GO:0010162,seed dormancy process	PF04570.14:zinc-finger of the FCS-type, C2-C2
Cs1g02910	1.16	1.53	1.4	1.07	1.36	1.22	78	98	84	68	86	78	-0.142673	0.595767	0.739993	false	chr1	2153421	2156937	+	Cs1g02910	--	K17964 leucine-rich PPR motif-containing protein, mitochondrial | (RefSeq) pentatricopeptide repeat-containing protein At5g61990, mitochondrial (A)	--	PREDICTED: pentatricopeptide repeat-containing protein At1g63330-like [Citrus sinensis]	RecName: Full=Pentatricopeptide repeat-containing protein At5g01110;	SubName: Full=Uncharacterized protein {ECO:0000313|EMBL:ESR58710.1};	FOG: PPR repeat	GO:0005739,mitochondrion; GO:0004519,endonuclease activity; GO:0003723,RNA binding; GO:0032543,mitochondrial translation; GO:0009451,RNA modification	PF13041.6:PPR repeat family
Cs1g02920	24.67	25.43	27.57	11.38	13.87	9.57	964	946	959	422	511	356	-1.13332	3.33133e-09	6.23779e-08	down	chr1	2158341	2161329	-	Cs1g02920	--	K13430 serine/threonine-protein kinase PBS1 [EC:2.7.11.1] | (RefSeq) serine/threonine-protein kinase PBS1 (A)	ko04626: Plant-pathogen interaction	PREDICTED: probable receptor-like protein kinase At5g47070 [Citrus sinensis]	RecName: Full=Probable serine/threonine-protein kinase PBL19 {ECO:0000305}; EC=2.7.11.1 {ECO:0000305}; AltName: Full=PBS1-like protein 19 {ECO:0000303|PubMed:20413097};	SubName: Full=Uncharacterized protein {ECO:0000313|EMBL:ESR58709.1};	Serine/threonine protein kinase	GO:0005886,plasma membrane; GO:0005524,ATP binding; GO:0004675,transmembrane receptor protein serine/threonine kinase activity; GO:0007166,cell surface receptor signaling pathway; GO:0006952,defense response; GO:0006468,protein phosphorylation	PF07714.17:Protein tyrosine kinase
Cs1g02930	6.6	6.44	7.69	4.46	8.76	10.31	757	703	785	485	947	1125	0.204125	0.537028	0.695709	false	chr1	2165306	2172535	+	Cs1g02930	--	K03260 translation initiation factor 4G | (RefSeq) eukaryotic translation initiation factor 4G (A)	ko03013: RNA transport	PREDICTED: eukaryotic translation initiation factor 4G [Citrus sinensis]	RecName: Full=Eukaryotic translation initiation factor 4G; Short=eIF-4G; Short=eIF4G; AltName: Full=Protein cucumovirus multiplication 2; AltName: Full=Protein synthesis initiation factor 4G;	SubName: Full=Uncharacterized protein {ECO:0000313|EMBL:GAY57875.1};	Translation initiation factor 4F, ribosome/mRNA-bridging subunit (eIF-4G)	GO:0003729,mRNA binding; GO:0003743,translation initiation factor activity; GO:0006417,regulation of translation; GO:0009737,response to abscisic acid; GO:0009615,response to virus	PF02854.19:MIF4G domain
Cs1g02940	32.12	29.98	31.58	31.9	36.59	31.98	1725	1533	1510	1626	1853	1635	0.124983	0.324636	0.499173	false	chr1	2179224	2183344	+	Cs1g02940	--	K03260 translation initiation factor 4G | (RefSeq) eukaryotic translation initiation factor 4G (A)	ko03013: RNA transport	hypothetical protein CUMW_182810 [Citrus unshiu]	RecName: Full=Eukaryotic translation initiation factor 4G; Short=eIF-4G; Short=eIF4G; AltName: Full=Protein cucumovirus multiplication 2; AltName: Full=Protein synthesis initiation factor 4G;	SubName: Full=Uncharacterized protein {ECO:0000313|EMBL:GAY57874.1};	Translation initiation factor 4F, ribosome/mRNA-bridging subunit (eIF-4G)	GO:0003729,mRNA binding; GO:0003743,translation initiation factor activity; GO:0006417,regulation of translation; GO:0009737,response to abscisic acid; GO:0009615,response to virus	PF02854.19:MIF4G domain
Cs1g02950	2.6	2.46	2.6	3.19	3.06	2.88	209	188	186	243	232	220	0.278357	0.1164	0.239377	false	chr1	2183765	2188301	+	Cs1g02950	--	K03260 translation initiation factor 4G | (RefSeq) eukaryotic translation initiation factor 4G (A)	ko03013: RNA transport	hypothetical protein CUMW_182800 [Citrus unshiu]	RecName: Full=Eukaryotic translation initiation factor 4G; Short=eIF-4G; Short=eIF4G; AltName: Full=Eukaryotic initiation factor 4F subunit p220; Short=eIF-4F p220 subunit;	SubName: Full=Uncharacterized protein {ECO:0000313|EMBL:GAY57872.1};	Translation initiation factor 4F, ribosome/mRNA-bridging subunit (eIF-4G)	GO:0003743,translation initiation factor activity; GO:0006417,regulation of translation	PF02854.19:MIF4G domain
Cs1g02960	33.75	25.98	41.24	27.78	27.49	28.28	1478	1083	1608	1155	1135	1179	-0.248027	0.261683	0.429989	false	chr1	2190753	2194105	+	Cs1g02960	--	K02921 large subunit ribosomal protein L37Ae | (RefSeq) 60S ribosomal protein L37a (A)	ko03010: Ribosome	hypothetical protein CISIN_1g045338mg [Citrus sinensis]	RecName: Full=60S ribosomal protein L37a-2;	SubName: Full=Uncharacterized protein {ECO:0000313|EMBL:KDO85434.1};	60S ribosomal protein L37	GO:0005840,ribosome; GO:0046872,metal ion binding; GO:0003735,structural constituent of ribosome; GO:0006412,translation	PF01780.19:Ribosomal L37ae protein family
Cs1g02970	5	7.46	6.15	6.37	6.18	9.32	243	345	266	294	283	431	0.262923	0.338351	0.514158	false	chr1	2192575	2195733	-	Cs1g02970	--	K00889 1-phosphatidylinositol-4-phosphate 5-kinase [EC:2.7.1.68] | (RefSeq) phosphatidylinositol 4-phosphate 5-kinase 8-like (A)	ko00562: Inositol phosphate metabolism; ko04070: Phosphatidylinositol signaling system; ko04144: Endocytosis	PREDICTED: uncharacterized protein LOC102618644 [Citrus sinensis]	RecName: Full=Phosphatidylinositol 4-phosphate 5-kinase 8; Short=AtPIP5K8; EC=2.7.1.68; AltName: Full=1-phosphatidylinositol 4-phosphate kinase 8; AltName: Full=Diphosphoinositide kinase 8; AltName: Full=PtdIns(4)P-5-kinase 8;	SubName: Full=Uncharacterized protein {ECO:0000313|EMBL:GAY57870.1};	Junctional membrane complex protein Junctophilin and related MORN repeat proteins	GO:0016308,1-phosphatidylinositol-4-phosphate 5-kinase activity; GO:0005524,ATP binding	PF02493.20:MORN repeat
Cs1g02980	38.01	39.54	39.64	42.13	44.33	47.65	1472	1458	1367	1549	1619	1757	0.220717	0.0619749	0.150883	false	chr1	2197786	2201008	-	Cs1g02980	--	K03115 casein kinase II subunit beta | (RefSeq) casein kinase II subunit beta (A)	ko03008: Ribosome biogenesis in eukaryotes; ko04712: Circadian rhythm - plant	hypothetical protein CICLE_v10021491mg [Citrus clementina]	RecName: Full=Putative casein kinase II subunit beta-4; Short=CK II beta-4;	RecName: Full=Casein kinase II subunit beta {ECO:0000256|RuleBase:RU361268}; Short=CK II beta {ECO:0000256|RuleBase:RU361268};	Casein kinase II, beta subunit	GO:0005737,cytoplasm; GO:0005829,cytosol; GO:0005634,nucleus; GO:0005956,protein kinase CK2 complex; GO:0019887,protein kinase regulator activity; GO:0004674,protein serine/threonine kinase activity; GO:0007623,circadian rhythm; GO:0048573,photoperiodism, flowering; GO:0042753,positive regulation of circadian rhythm	PF01214.18:Casein kinase II regulatory subunit
Cs1g02990	1.18	2.16	1.77	1.11	4.46	2.38	39	68	52	35	139	75	0.659333	0.237944	0.401283	false	chr1	2208107	2211099	+	Cs1g02990	--	K20661 cytochrome P450 family 714 subfamily A polypeptide 1 | (RefSeq) cytochrome P450 714A1-like (A)	--	PREDICTED: cytochrome P450 714C2-like [Citrus sinensis]	RecName: Full=Cytochrome P450 714C2; EC=1.14.-.-;	SubName: Full=Uncharacterized protein {ECO:0000313|EMBL:GAY57867.1};	Cytochrome P450 CYP4/CYP19/CYP26 subfamilies	GO:0016021,integral component of membrane; GO:0020037,heme binding; GO:0005506,iron ion binding; GO:0004497,monooxygenase activity; GO:0016705,oxidoreductase activity, acting on paired donors, with incorporation or reduction of molecular oxygen	PF00067.22:Cytochrome P450
Cs1g03000	13.45	21.99	17.52	10.64	12.33	11.92	237	369	275	178	205	200	-0.57337	0.0205734	0.0641275	false	chr1	2211406	2213308	-	Cs1g03000	--	K18185 cytochrome c oxidase assembly protein subunit 23 | (RefSeq) cytochrome c oxidase-assembly factor COX23, mitochondrial (A)	--	hypothetical protein CICLE_v10023064mg [Citrus clementina]	--	SubName: Full=Uncharacterized protein {ECO:0000313|EMBL:ESR58701.1};	Uncharacterized conserved protein	GO:0016021,integral component of membrane	PF06747.13:CHCH domain
Cs1g03030	16.48	14.95	16.14	18.51	20.71	19.73	1810	1563	1578	1929	2144	2063	0.333538	0.00710337	0.0274059	false	chr1	2226639	2233826	+	Cs1g03030	--	K13161 heterogeneous nuclear ribonucleoprotein R | (RefSeq) nucleolin-like (A)	--	PREDICTED: RNA recognition motif protein 1 isoform X1 [Citrus sinensis]	RecName: Full=Heterogeneous nuclear ribonucleoprotein Q {ECO:0000305}; Short=hnRNP Q {ECO:0000305}; AltName: Full=Protein LHP1-INTERACTING FACTOR 2 {ECO:0000303|PubMed:21304947};	SubName: Full=Uncharacterized protein {ECO:0000313|EMBL:GAY57860.1};	--	GO:0005737,cytoplasm; GO:0005829,cytosol; GO:0005783,endoplasmic reticulum; GO:0005634,nucleus; GO:0003682,chromatin binding; GO:0003729,mRNA binding; GO:0043565,sequence-specific DNA binding; GO:0071395,cellular response to jasmonic acid stimulus; GO:0042742,defense response to bacterium; GO:0050832,defense response to fungus; GO:0045087,innate immune response; GO:0007275,multicellular organism …	PF00076.22:RNA recognition motif. (a.k.a. RRM, RBD, or RNP domain)
Cs1g03040	2.12	1.19	1.98	1.37	1.12	1.15	111	59	92	68	55	57	-0.517455	0.151187	0.289116	false	chr1	2234685	2238566	+	Cs1g03040	--	--	--	PREDICTED: uncharacterized protein LOC102621214 [Citrus sinensis]	--	SubName: Full=Uncharacterized protein {ECO:0000313|EMBL:ESR58693.1};	--	GO:0016021,integral component of membrane; GO:0003755,peptidyl-prolyl cis-trans isomerase activity	PF00160.21:Cyclophilin type peptidyl-prolyl cis-trans isomerase/CLD
Cs1g03050	8.14	10.04	9.85	5.58	6.97	8.3	300	352	323	195	242	291	-0.400753	0.0791391	0.180124	false	chr1	2237227	2240359	-	Cs1g03050	--	K02257 heme o synthase [EC:2.5.1.141] | (RefSeq) protoheme IX farnesyltransferase, mitochondrial (A)	ko00190: Oxidative phosphorylation; ko00860: Porphyrin and chlorophyll metabolism	hypothetical protein CICLE_v10020370mg [Citrus clementina]	RecName: Full=Protoheme IX farnesyltransferase, mitochondrial; EC=2.5.1.-; AltName: Full=Cytochrome c oxidase assembly protein COX10; AltName: Full=Heme O synthase; Flags: Precursor;	SubName: Full=Uncharacterized protein {ECO:0000313|EMBL:KDO85465.1};	Heme A farnesyltransferase	GO:0016021,integral component of membrane; GO:0005743,mitochondrial inner membrane; GO:0005739,mitochondrion; GO:0004311,farnesyltranstransferase activity; GO:0008495,protoheme IX farnesyltransferase activity; GO:0045333,cellular respiration; GO:0006783,heme biosynthetic process; GO:0048034,heme O biosynthetic process	PF01040.18:UbiA prenyltransferase family
Cs1g03060	13.83	18.2	14.18	14.71	16.61	17.4	723	906	660	730	819	866	0.103305	0.566261	0.716913	false	chr1	2241662	2244399	-	Cs1g03060	--	--	--	hypothetical protein CICLE_v10020863mg [Citrus clementina]	RecName: Full=Trihelix transcription factor ASIL2 {ECO:0000305}; AltName: Full=6B-interacting protein 1-like 2 {ECO:0000303|PubMed:21330492}; AltName: Full=Trihelix DNA-binding protein ASIL2 {ECO:0000305};	SubName: Full=Uncharacterized protein {ECO:0000313|EMBL:GAY57856.1};	Transcription factor GT-2 and related proteins, contains trihelix DNA-binding/SANT domain	GO:0005634,nucleus; GO:0003700,DNA-binding transcription factor activity; GO:0043565,sequence-specific DNA binding; GO:0009793,embryo development ending in seed dormancy; GO:0006355,regulation of transcription, DNA-templated; GO:0010431,seed maturation; GO:0006351,transcription, DNA-templated	PF13837.6:Myb/SANT-like DNA-binding domain
Cs1g03070	1.39	1.31	3.22	0	0.16	0.24	37	33	76	0	4	6	-3.87272	8.59213e-06	8.60962e-05	down	chr1	2248135	2250075	-	Cs1g03070	--	--	--	hypothetical protein CICLE_v10022279mg [Citrus clementina]	RecName: Full=Cyclin-U4-1; Short=CycU4;1; AltName: Full=Cyclin-P4.1; Short=CycP4;1;	SubName: Full=Uncharacterized protein {ECO:0000313|EMBL:GAY57855.1};	Cyclin	GO:0019901,protein kinase binding; GO:0007049,cell cycle; GO:0051301,cell division; GO:0000079,regulation of cyclin-dependent protein serine/threonine kinase activity	PF08613.11:Cyclin
Cs1g03080	12.58	20.01	14.96	12.05	13.09	12.82	540	818	572	491	530	524	-0.296401	0.178742	0.326495	false	chr1	2253820	2256498	-	Cs1g03080	--	K17710 pentatricopeptide repeat domain-containing protein 1 | (RefSeq) pentatricopeptide repeat-containing protein At2g18940, chloroplastic (A)	--	hypothetical protein CICLE_v10019658mg [Citrus clementina]	RecName: Full=Pentatricopeptide repeat-containing protein At1g02150;	SubName: Full=Uncharacterized protein {ECO:0000313|EMBL:GAY57854.1};	FOG: PPR repeat	GO:0009507,chloroplast; GO:0043231,intracellular membrane-bounded organelle; GO:0004519,endonuclease activity; GO:0003729,mRNA binding; GO:0003723,RNA binding; GO:0009451,RNA modification	PF01535.20:PPR repeat
Cs1g03090	12.17	12.39	11.94	14.57	15.35	14.04	418	405	365	475	497	459	0.293695	0.0326316	0.0921909	false	chr1	2258225	2265764	-	Cs1g03090	--	K03847 alpha-1,6-mannosyltransferase [EC:2.4.1.260] | (RefSeq) dol-P-Man:Man(7)GlcNAc(2)-PP-Dol alpha-1,6-mannosyltransferase (A)	ko00510: N-Glycan biosynthesis; ko00513: Various types of N-glycan biosynthesis	PREDICTED: dol-P-Man:Man(7)GlcNAc(2)-PP-Dol alpha-1,6-mannosyltransferase isoform X1 [Citrus sinensis]	RecName: Full=Dol-P-Man:Man(7)GlcNAc(2)-PP-Dol alpha-1,6-mannosyltransferase; EC=2.4.1.260; AltName: Full=Alpha-1,6-mannosyltransferase ALG12; AltName: Full=Asparagine-linked glycosylation protein 12; AltName: Full=EMS-mutagenized BRI1 suppressor 4;	RecName: Full=Mannosyltransferase {ECO:0000256|RuleBase:RU363075}; EC=2.4.1.- {ECO:0000256|RuleBase:RU363075};	Protein involved in dolichol pathway for N-glycosylation (mannosyltransferase family)	GO:0005783,endoplasmic reticulum; GO:0005789,endoplasmic reticulum membrane; GO:0016021,integral component of membrane; GO:0052917,dol-P-Man:Man(7)GlcNAc(2)-PP-Dol alpha-1,6-mannosyltransferase activity; GO:0006487,protein N-linked glycosylation; GO:0030433,ubiquitin-dependent ERAD pathway	PF03901.17:Alg9-like mannosyltransferase family
Cs1g03100	1.55	2.42	1.23	5.03	2.44	1.33	27	40	19	83	40	22	0.793462	0.203296	0.358307	false	chr1	2270797	2274197	-	Cs1g03100	--	K13424 WRKY transcription factor 33 | (RefSeq) probable WRKY transcription factor 25 (A)	ko04016: MAPK signaling pathway - plant; ko04626: Plant-pathogen interaction	hypothetical protein CICLE_v10023956mg [Citrus clementina]	RecName: Full=Probable WRKY transcription factor 12; AltName: Full=WRKY DNA-binding protein 12;	SubName: Full=Uncharacterized protein {ECO:0000313|EMBL:GAY57852.1};	--	GO:0005634,nucleus; GO:0003700,DNA-binding transcription factor activity; GO:0043565,sequence-specific DNA binding; GO:0006351,transcription, DNA-templated	PF03106.15:WRKY DNA -binding domain
Cs1g03110	554.23	406.25	584.24	339.81	366.58	339.73	12479	8709	11712	7263	7783	7282	-0.538898	0.00597611	0.0238169	false	chr1	2283529	2285110	+	Cs1g03110	--	K00940 nucleoside-diphosphate kinase [EC:2.7.4.6] | (RefSeq) nucleoside diphosphate kinase 1-like (A)	ko00230: Purine metabolism; ko00240: Pyrimidine metabolism; ko04016: MAPK signaling pathway - plant	hypothetical protein CISIN_1g031851mg [Citrus sinensis]	RecName: Full=Nucleoside diphosphate kinase 1; EC=2.7.4.6; AltName: Full=Nucleoside diphosphate kinase I; Short=NDK I; Short=NDP kinase I; Short=NDPK I;	SubName: Full=Uncharacterized protein {ECO:0000313|EMBL:GAY57851.1};	Nucleoside diphosphate kinase	GO:0005634,nucleus; GO:0005777,peroxisome; GO:0005524,ATP binding; GO:0046872,metal ion binding; GO:0004550,nucleoside diphosphate kinase activity; GO:0070301,cellular response to hydrogen peroxide; GO:0006241,CTP biosynthetic process; GO:0006183,GTP biosynthetic process; GO:0006165,nucleoside diphosphate phosphorylation; GO:0006228,UTP biosynthetic process	PF00334.19:Nucleoside diphosphate kinase
Cs1g03120	20.47	21.86	25.02	15.14	17.7	17.49	953	969	1037	669	777	775	-0.394607	0.0113372	0.040055	false	chr1	2285819	2290535	-	Cs1g03120	--	K23538 ELMO domain-containing protein | (RefSeq) ELMO domain-containing protein C isoform X1 (A)	--	hypothetical protein CICLE_v10021713mg [Citrus clementina]	--	SubName: Full=Uncharacterized protein {ECO:0000313|EMBL:GAY57850.1};	Uncharacterized conserved protein	--	PF04727.13:ELMO/CED-12 family
Cs1g03130	5.69	6.37	4.7	7.14	6.67	6.94	303	323	223	361	335	352	0.334365	0.0863357	0.192279	false	chr1	2294788	2297997	+	Cs1g03130	--	K23538 ELMO domain-containing protein | (RefSeq) uncharacterized protein LOC102623958 (A)	--	hypothetical protein CICLE_v10019814mg [Citrus clementina]	--	SubName: Full=Uncharacterized protein {ECO:0000313|EMBL:GAY57846.1};	--	--	--
Cs1g03140	68.82	61.92	73.06	67.72	60.3	67.99	1899	1627	1795	1774	1569	1786	-0.0296846	0.845797	0.91012	false	chr1	2296931	2300292	-	Cs1g03140	--	K12877 protein mago nashi | (RefSeq) protein mago nashi homolog (A)	ko03013: RNA transport; ko03015: mRNA surveillance pathway; ko03040: Spliceosome	hypothetical protein CICLE_v10022690mg [Citrus clementina]	RecName: Full=Protein mago nashi homolog 2 {ECO:0000305}; Short=OsMAGO2 {ECO:0000303|PubMed:24416299}; AltName: Full=Mago nashi-like protein 2 {ECO:0000305};	SubName: Full=Uncharacterized protein {ECO:0000313|EMBL:ESR58680.1};	Exon-exon junction complex, Magoh component	GO:0005737,cytoplasm; GO:0035145,exon-exon junction complex; GO:0005634,nucleus; GO:0003723,RNA binding; GO:0006397,mRNA processing; GO:0051028,mRNA transport; GO:0000184,nuclear-transcribed mRNA catabolic process, nonsense-mediated decay; GO:0006417,regulation of translation; GO:0008380,RNA splicing	PF02792.14:Mago nashi protein
Cs1g03150	70.09	98.15	140.7	10.78	38.96	6.52	870	1160	1555	127	456	77	-2.44347	7.10708e-05	0.000555801	down	chr1	2301222	2302089	-	Cs1g03150	--	--	--	hypothetical protein CICLE_v10022525mg [Citrus clementina]	RecName: Full=Blue copper protein; Flags: Precursor;	SubName: Full=Uncharacterized protein {ECO:0000313|EMBL:GAY57843.1};	--	GO:0009055,electron transfer activity; GO:0046872,metal ion binding	PF02298.17:Plastocyanin-like domain
Cs1g03160	107.81	126.56	131.66	82.85	99.36	84.49	2658	2971	2890	1939	2310	1983	-0.431102	0.00391049	0.0168377	false	chr1	2305762	2308913	+	Cs1g03160	--	K07874 Ras-related protein Rab-1A | (RefSeq) ras-related protein RABD2a (A)	--	PREDICTED: ras-related protein RABD2a [Citrus sinensis]	RecName: Full=Ras-related protein RABD2a; Short=AtRABD2a; AltName: Full=Ras-related protein Ara-5; AltName: Full=Ras-related protein Rab1B; Short=AtRab1B;	SubName: Full=RAS 5 {ECO:0000313|EMBL:JAV45059.1};	GTPase Rab1/YPT1, small G protein superfamily, and related GTP-binding proteins	GO:0005789,endoplasmic reticulum membrane; GO:0000139,Golgi membrane; GO:0005886,plasma membrane; GO:0032588,trans-Golgi network membrane; GO:0005773,vacuole; GO:0005525,GTP binding; GO:0003924,GTPase activity; GO:0006888,ER to Golgi vesicle-mediated transport; GO:0015031,protein transport; GO:0046686,response to cadmium ion	PF00071.22:Ras family
Cs1g03170	15.84	11.54	15.76	29.93	18.39	20.34	760	527	673	1363	832	929	0.698924	0.0129755	0.044534	false	chr1	2311074	2322980	-	Cs1g03170	--	K14164 glycyl-tRNA synthetase [EC:6.1.1.14] | (RefSeq) glycine--tRNA ligase, chloroplastic/mitochondrial 2 (A)	ko00970: Aminoacyl-tRNA biosynthesis	PREDICTED: glycine--tRNA ligase, chloroplastic/mitochondrial 2 isoform X3 [Citrus sinensis]	RecName: Full=Glycine--tRNA ligase, chloroplastic/mitochondrial 2 {ECO:0000305}; EC=6.1.1.14 {ECO:0000269|PubMed:11278923}; AltName: Full=Glycyl-tRNA synthetase 2 {ECO:0000303|PubMed:11278923}; Short=GlyRS-2 {ECO:0000303|PubMed:11278923}; AltName: Full=Protein EMBRYO-DEFECTIVE-DEVELOPMENT 1 {ECO:0000303|PubMed:9707529}; Flags: Precursor;	SubName: Full=Uncharacterized protein {ECO:0000313|EMBL:GAY57837.1};	--	GO:0009507,chloroplast; GO:0009570,chloroplast stroma; GO:0005739,mitochondrion; GO:0005524,ATP binding; GO:0004820,glycine-tRNA ligase activity; GO:0046983,protein dimerization activity; GO:0009793,embryo development ending in seed dormancy; GO:0006426,glycyl-tRNA aminoacylation; GO:0045995,regulation of embryonic development	PF02092.17:Glycyl-tRNA synthetase beta subunit
Cs1g03180	19.45	18.08	16.15	16.7	20.59	18.54	487	431	360	397	486	442	0.079536	0.650147	0.779166	false	chr1	2326079	2328646	+	Cs1g03180	--	K10640 E3 ubiquitin-protein ligase RNF25 [EC:2.3.2.27] | (RefSeq) hypothetical protein (A)	--	hypothetical protein CICLE_v10020918mg [Citrus clementina]	--	SubName: Full=Uncharacterized protein {ECO:0000313|EMBL:ESR58676.1};	--	--	PF05773.22:RWD domain
Cs1g03200	17.01	13.72	18.06	17.83	18.32	14.25	884	679	836	880	898	705	0.07113	0.726602	0.832482	false	chr1	2361386	2369125	-	Cs1g03200	--	--	--	PREDICTED: protein VASCULAR ASSOCIATED DEATH 1, chloroplastic isoform X1 [Citrus sinensis]	RecName: Full=Protein VASCULAR ASSOCIATED DEATH 1, chloroplastic {ECO:0000303|PubMed:15269331}; Flags: Precursor;	SubName: Full=Uncharacterized protein {ECO:0000313|EMBL:KDO85504.1};	Uncharacterized conserved protein, contains GRAM domain	GO:0009507,chloroplast; GO:0005783,endoplasmic reticulum; GO:0016021,integral component of membrane; GO:0042742,defense response to bacterium; GO:0009873,ethylene-activated signaling pathway; GO:0043069,negative regulation of programmed cell death; GO:0009626,plant-type hypersensitive response; GO:0009723,response to ethylene; GO:0009751,response to salicylic acid	PF16016.5:VAD1 Analog of StAR-related lipid transfer domain
Cs1g03210	10.78	8.88	10.17	9.16	9.59	8.36	687	539	577	554	576	507	-0.114664	0.493701	0.659587	false	chr1	2375773	2381348	+	Cs1g03210	--	K08286 protein-serine/threonine kinase [EC:2.7.11.-] | (RefSeq) serine/threonine-protein kinase D6PKL2 (A)	--	hypothetical protein CICLE_v10019033mg [Citrus clementina]	RecName: Full=Serine/threonine-protein kinase D6PKL2; EC=2.7.11.1; AltName: Full=D6 protein kinase-like 2; AltName: Full=Serine/threonine-protein kinase AtPK5;	SubName: Full=Uncharacterized protein {ECO:0000313|EMBL:ESR58671.1};	Putative serine/threonine protein kinase	GO:0005737,cytoplasm; GO:0005730,nucleolus; GO:0005634,nucleus; GO:0005886,plasma membrane; GO:0005524,ATP binding; GO:0016301,kinase activity; GO:0004672,protein kinase activity; GO:0004674,protein serine/threonine kinase activity; GO:0009734,auxin-activated signaling pathway; GO:0010540,basipetal auxin transport; GO:0035556,intracellular signal transduction; GO:0006468,protein phosphorylation	PF00069.25:Protein kinase domain
Cs1g03220	16.08	19.31	19.75	22.34	18.57	19.63	906	1036	991	1195	987	1053	0.164142	0.336493	0.512147	false	chr1	2385264	2390729	-	Cs1g03220	--	--	--	hypothetical protein CISIN_1g040600mg [Citrus sinensis]	RecName: Full=Nitrate regulatory gene2 protein {ECO:0000303|PubMed:26744214}; Short=NRG2 protein {ECO:0000303|PubMed:26744214};	SubName: Full=Uncharacterized protein {ECO:0000313|EMBL:KDO85511.1};	--	GO:0005634,nucleus; GO:0071249,cellular response to nitrate; GO:0015706,nitrate transport; GO:0071705,nitrogen compound transport; GO:0006355,regulation of transcription, DNA-templated; GO:0010167,response to nitrate; GO:1901698,response to nitrogen compound; GO:0006351,transcription, DNA-templated	PF04782.12:Protein of unknown function (DUF632)
Cs1g03230	16.78	14.37	17.67	20.71	14.98	16.82	525	428	492	615	442	501	0.133377	0.541266	0.698868	false	chr1	2393547	2399306	-	Cs1g03230	--	K15451 tRNA wybutosine-synthesizing protein 4 [EC:2.1.1.290 2.3.1.231] | (RefSeq) tRNA wybutosine-synthesizing protein 4 (A)	--	hypothetical protein CICLE_v10021096mg [Citrus clementina]	RecName: Full=Leucine carboxyl methyltransferase 1 homolog {ECO:0000305}; EC=2.1.1.233 {ECO:0000269|PubMed:21558554}; AltName: Full=Protein SUPPRESSOR OF BRI1 {ECO:0000303|PubMed:21558554}; AltName: Full=[Phosphatase 2A protein]-leucine-carboxy methyltransferase 1 {ECO:0000305};	SubName: Full=Uncharacterized protein {ECO:0000313|EMBL:ESR58669.1};	Carboxymethyl transferase	GO:0005829,cytosol; GO:0008757,S-adenosylmethionine-dependent methyltransferase activity; GO:0032259,methylation	PF04072.14:Leucine carboxyl methyltransferase
Cs1g03240	22.79	24.07	26.17	23.14	22.24	24.04	1381	1389	1412	1331	1271	1387	-0.0459725	0.723296	0.830342	false	chr1	2401562	2406346	+	Cs1g03240	--	K12180 COP9 signalosome complex subunit 7 | (RefSeq) COP9 signalosome complex subunit 7 (A)	--	hypothetical protein CUMW_062400 [Citrus unshiu]	RecName: Full=COP9 signalosome complex subunit 7; Short=CSN complex subunit 7; AltName: Full=Protein FUSCA 5;	SubName: Full=Uncharacterized protein {ECO:0000313|EMBL:GAY41828.1};	COP9 signalosome, subunit CSN7	GO:0008180,COP9 signalosome; GO:0005829,cytosol; GO:0010387,COP9 signalosome assembly; GO:0007275,multicellular organism development; GO:0000338,protein deneddylation; GO:0009585,red, far-red light phototransduction	PF01399.27:PCI domain
Cs1g03250	13.55	7.08	22.22	3.05	6.75	3.91	215	107	314	46	101	59	-1.62708	0.00140844	0.00719074	down	chr1	2407487	2408317	-	Cs1g03250	--	K09286 EREBP-like factor | (RefSeq) ethylene-responsive transcription factor 13-like (A)	--	PREDICTED: ethylene-responsive transcription factor 13-like [Citrus sinensis]	RecName: Full=Ethylene-responsive transcription factor 13; Short=AtERF13; AltName: Full=Ethylene-responsive element-binding factor 13; Short=EREBP-13;	SubName: Full=Uncharacterized protein {ECO:0000313|EMBL:GAY41831.1};	--	GO:0005634,nucleus; GO:0003677,DNA binding; GO:0003700,DNA-binding transcription factor activity; GO:0043565,sequence-specific DNA binding; GO:0006952,defense response; GO:0009873,ethylene-activated signaling pathway; GO:0010200,response to chitin; GO:0006351,transcription, DNA-templated	PF00847.20:AP2 domain
Cs1g03260	33.65	16.03	49.62	36.89	40.37	37.47	518	235	680	539	586	549	0.231	0.568622	0.718582	false	chr1	2414022	2414827	-	Cs1g03260	--	K09286 EREBP-like factor | (RefSeq) ethylene-responsive transcription factor 13-like (A)	--	hypothetical protein CICLE_v10021995mg [Citrus clementina]	RecName: Full=Ethylene-responsive transcription factor 13; Short=AtERF13; AltName: Full=Ethylene-responsive element-binding factor 13; Short=EREBP-13;	SubName: Full=Uncharacterized protein {ECO:0000313|EMBL:ESR58658.1};	--	GO:0005634,nucleus; GO:0003677,DNA binding; GO:0003700,DNA-binding transcription factor activity; GO:0043565,sequence-specific DNA binding; GO:0006952,defense response; GO:0009873,ethylene-activated signaling pathway; GO:0010200,response to chitin; GO:0006351,transcription, DNA-templated	PF00847.20:AP2 domain
Cs1g03280	55.75	122.47	69.92	33.41	35.69	22.31	1037	2169	1158	590	626	395	-1.4104	6.14835e-05	0.000490161	down	chr1	2426867	2427840	-	Cs1g03280	--	K09286 EREBP-like factor | (RefSeq) ethylene-responsive transcription factor 13 (A)	--	hypothetical protein CICLE_v10022734mg [Citrus clementina]	RecName: Full=Ethylene-responsive transcription factor 13; Short=AtERF13; AltName: Full=Ethylene-responsive element-binding factor 13; Short=EREBP-13;	SubName: Full=Uncharacterized protein {ECO:0000313|EMBL:GAY41834.1};	--	GO:0005634,nucleus; GO:0003677,DNA binding; GO:0003700,DNA-binding transcription factor activity; GO:0043565,sequence-specific DNA binding; GO:0006952,defense response; GO:0009873,ethylene-activated signaling pathway; GO:0010200,response to chitin; GO:0006351,transcription, DNA-templated	PF00847.20:AP2 domain
Cs1g03290	0.91	0.32	1.36	1.21	1.35	0.76	15	5	20	19	21	12	0.386458	0.589678	0.735672	false	chr1	2448991	2449857	-	Cs1g03290	--	K09286 EREBP-like factor | (RefSeq) ethylene-responsive transcription factor 13-like (A)	--	hypothetical protein CICLE_v10022025mg [Citrus clementina]	RecName: Full=Ethylene-responsive transcription factor 13; Short=AtERF13; AltName: Full=Ethylene-responsive element-binding factor 13; Short=EREBP-13;	SubName: Full=Uncharacterized protein {ECO:0000313|EMBL:ESR58654.1};	--	GO:0005634,nucleus; GO:0003677,DNA binding; GO:0003700,DNA-binding transcription factor activity; GO:0043565,sequence-specific DNA binding; GO:0006952,defense response; GO:0009873,ethylene-activated signaling pathway; GO:0010200,response to chitin; GO:0006351,transcription, DNA-templated	PF00847.20:AP2 domain
Cs1g03300	4.3	1.11	4.66	5.21	3.4	2.38	114	28	110	131	85	60	0.149076	0.80441	0.883865	false	chr1	2513606	2514993	-	Cs1g03300	--	K09286 EREBP-like factor | (RefSeq) ethylene-responsive transcription factor 2-like (A)	--	hypothetical protein CICLE_v10021132mg [Citrus clementina]	RecName: Full=Ethylene-responsive transcription factor 13; Short=AtERF13; AltName: Full=Ethylene-responsive element-binding factor 13; Short=EREBP-13;	SubName: Full=Uncharacterized protein {ECO:0000313|EMBL:ESR58653.1};	--	GO:0005634,nucleus; GO:0003677,DNA binding; GO:0003700,DNA-binding transcription factor activity; GO:0043565,sequence-specific DNA binding; GO:0006952,defense response; GO:0009873,ethylene-activated signaling pathway; GO:0010200,response to chitin; GO:0006351,transcription, DNA-templated	PF00847.20:AP2 domain
Cs1g03310	172.56	48.34	215.5	80.36	132.63	100.62	3513	937	3906	1553	2546	1950	-0.460536	0.36471	0.539483	false	chr1	2536742	2537807	+	Cs1g03310	--	K09286 EREBP-like factor | (RefSeq) ethylene-responsive transcription factor 2-like (A)	--	PREDICTED: ethylene-responsive transcription factor 2-like [Citrus sinensis]	RecName: Full=Ethylene-responsive transcription factor 13; Short=AtERF13; AltName: Full=Ethylene-responsive element-binding factor 13; Short=EREBP-13;	SubName: Full=Uncharacterized protein {ECO:0000313|EMBL:KDO85532.1};	--	GO:0005634,nucleus; GO:0003677,DNA binding; GO:0003700,DNA-binding transcription factor activity; GO:0043565,sequence-specific DNA binding; GO:0006952,defense response; GO:0009873,ethylene-activated signaling pathway; GO:0010200,response to chitin; GO:0006351,transcription, DNA-templated	PF00847.20:AP2 domain
Cs1g03320	1.28	1.92	1.65	3.14	3.3	3.4	60	86	69	140	146	152	1.04928	4.63398e-05	0.000381192	up	chr1	2543258	2549089	+	Cs1g03320	--	K01535 H+-transporting ATPase [EC:3.6.3.6] | (RefSeq) ATPase 11, plasma membrane-type (A)	ko00190: Oxidative phosphorylation	PREDICTED: UPF0565 protein C2orf69 homolog [Citrus sinensis]	RecName: Full=Plasma membrane ATPase 1; EC=3.6.3.6; AltName: Full=Proton pump 1;	SubName: Full=Uncharacterized protein {ECO:0000313|EMBL:GAY41839.1};	Conserved developmentally regulated protein	GO:0016021,integral component of membrane; GO:0005886,plasma membrane; GO:0005524,ATP binding; GO:0008553,proton-exporting ATPase activity, phosphorylative mechanism; GO:0046872,metal ion binding; GO:0006754,ATP biosynthetic process	PF10561.9:Uncharacterised protein family UPF0565
Cs1g03330	5.45	5.36	6.66	4.65	5.12	4.06	158	148	172	128	140	112	-0.311415	0.175387	0.321874	false	chr1	2549506	2553506	+	Cs1g03330	--	K01074 palmitoyl-protein thioesterase [EC:3.1.2.22] | (RefSeq) palmitoyl-protein thioesterase 1 (A)	ko00062: Fatty acid elongation; ko01212: Fatty acid metabolism	PREDICTED: palmitoyl-protein thioesterase 1 [Citrus sinensis]	--	SubName: Full=Uncharacterized protein {ECO:0000313|EMBL:KDO85535.1};	Palmitoyl protein thioesterase	GO:0016021,integral component of membrane; GO:0098599,palmitoyl hydrolase activity	PF02089.15:Palmitoyl protein thioesterase
Cs1g03340	17.35	18.04	17.56	18.63	18.85	18.43	1219	1207	1099	1243	1249	1233	0.104572	0.326709	0.501321	false	chr1	2556638	2564029	-	Cs1g03340	--	K10268 F-box and leucine-rich repeat protein 2/20 | (RefSeq) F-box/LRR-repeat protein 4 (A)	--	hypothetical protein CICLE_v10018755mg [Citrus clementina]	RecName: Full=Protein ARABIDILLO 1; AltName: Full=F-box only protein 5;	SubName: Full=Uncharacterized protein {ECO:0000313|EMBL:GAY41842.1};	--	GO:0005737,cytoplasm; GO:0005634,nucleus; GO:0008134,transcription factor binding; GO:0048527,lateral root development	PF00514.23:Armadillo/beta-catenin-like repeat
Cs1g03350	30.98	34.77	33.63	27.07	31.24	27.36	1342	1434	1297	1113	1276	1128	-0.188783	0.138685	0.271899	false	chr1	2565444	2569253	+	Cs1g03350	--	K03294 basic amino acid/polyamine antiporter, APA family | (RefSeq) cationic amino acid transporter 9, chloroplastic (A)	--	hypothetical protein CICLE_v10019465mg [Citrus clementina]	RecName: Full=Cationic amino acid transporter 9, chloroplastic; Flags: Precursor;	SubName: Full=Uncharacterized protein {ECO:0000313|EMBL:ESR58643.1};	Amino acid transporters	GO:0031969,chloroplast membrane; GO:0016021,integral component of membrane; GO:0005774,vacuolar membrane; GO:0015171,amino acid transmembrane transporter activity	PF13520.6:Amino acid permease
Cs1g03360	4.72	2.48	3.25	8.5	4.35	6.17	114	57	70	195	99	142	0.889989	0.0303729	0.0872404	false	chr1	2569271	2571459	-	Cs1g03360	--	K01802 peptidylprolyl isomerase [EC:5.2.1.8] | (RefSeq) peptidyl-prolyl cis-trans isomerase FKBP16-3, chloroplastic (A)	--	hypothetical protein CICLE_v10021814mg [Citrus clementina]	RecName: Full=Peptidyl-prolyl cis-trans isomerase FKBP20-2, chloroplastic {ECO:0000303|PubMed:15047905}; Short=PPIase FKBP20-2 {ECO:0000303|PubMed:15047905}; EC=5.2.1.8 {ECO:0000305}; AltName: Full=FK506-binding protein 20-2 {ECO:0000303|PubMed:15047905}; Short=AtFKBP20-2 {ECO:0000303|PubMed:15047905}; AltName: Full=Immunophilin FKBP20-2 {ECO:0000303|PubMed:15047905}; AltName: Full=Rotamase; Flag…	RecName: Full=Peptidylprolyl isomerase {ECO:0000256|PROSITE-ProRule:PRU00277}; EC=5.2.1.8 {ECO:0000256|PROSITE-ProRule:PRU00277};	--	GO:0009507,chloroplast; GO:0009543,chloroplast thylakoid lumen; GO:0005737,cytoplasm; GO:0009579,thylakoid; GO:0031977,thylakoid lumen; GO:0005528,FK506 binding; GO:0016491,oxidoreductase activity; GO:0003755,peptidyl-prolyl cis-trans isomerase activity; GO:0061077,chaperone-mediated protein folding; GO:0010207,photosystem II assembly	PF00254.28:FKBP-type peptidyl-prolyl cis-trans isomerase
Cs1g03370	4.52	5.06	5.74	4.04	5.01	5.04	184	196	208	156	192	195	-0.0958694	0.652561	0.780701	false	chr1	2573735	2577518	-	Cs1g03370	--	--	--	PREDICTED: putative dual specificity protein phosphatase DSP8 isoform X1 [Citrus sinensis]	RecName: Full=Putative dual specificity protein phosphatase DSP8; EC=3.1.3.16; EC=3.1.3.48;	SubName: Full=Uncharacterized protein {ECO:0000313|EMBL:KDO85555.1};	Dual specificity phosphatase	GO:0004439,phosphatidylinositol-4,5-bisphosphate 5-phosphatase activity; GO:0004725,protein tyrosine phosphatase activity; GO:0008138,protein tyrosine/serine/threonine phosphatase activity	PF00782.20:Dual specificity phosphatase, catalytic domain
Cs1g03380	1.91	1.73	2.19	1.72	1.33	1.65	96	83	98	82	63	79	-0.283796	0.310231	0.484454	false	chr1	2578646	2581276	-	Cs1g03380	--	--	--	PREDICTED: uncharacterized protein LOC102607181 [Citrus sinensis]	--	SubName: Full=Uncharacterized protein {ECO:0000313|EMBL:KDO85556.1};	--	GO:0016021,integral component of membrane	PF05553.11:Cotton fibre expressed protein
Cs1g03390	9.07	7.91	5.88	2.54	3.59	3.68	324	269	187	86	121	125	-1.20019	3.18634e-05	0.00027445	down	chr1	2585083	2587760	-	Cs1g03390	--	K09338 homeobox-leucine zipper protein | (RefSeq) homeobox-leucine zipper protein ATHB-4 (A)	--	hypothetical protein CICLE_v10021501mg [Citrus clementina]	RecName: Full=Homeobox-leucine zipper protein HAT3; AltName: Full=Homeodomain-leucine zipper protein HAT3; Short=HD-ZIP protein 3;	SubName: Full=Uncharacterized protein {ECO:0000313|EMBL:GAY41854.1};	Transcription factor HEX, contains HOX and HALZ domains	GO:0005634,nucleus; GO:0003700,DNA-binding transcription factor activity; GO:0043565,sequence-specific DNA binding; GO:0006351,transcription, DNA-templated	PF04618.12:HD-ZIP protein N terminus
Cs1g03410	22.27	29.69	19.74	26.31	17.03	22.03	635	806	501	712	458	598	-0.101765	0.705258	0.817994	false	chr1	2625818	2628308	-	Cs1g03410	--	K21444 poly(rC)-binding protein 3/4 | (RefSeq) poly(rC)-binding protein 4 (A)	--	hypothetical protein CICLE_v10021057mg [Citrus clementina]	RecName: Full=RNA-binding KH domain-containing protein PEPPER {ECO:0000303|PubMed:16356489};	SubName: Full=Uncharacterized protein {ECO:0000313|EMBL:ESR58631.1};	PolyC-binding proteins alphaCP-1 and related KH domain proteins	GO:0005634,nucleus; GO:0003723,RNA binding; GO:0048467,gynoecium development; GO:0009299,mRNA transcription; GO:0048579,negative regulation of long-day photoperiodism, flowering; GO:0048577,negative regulation of short-day photoperiodism, flowering; GO:0006355,regulation of transcription, DNA-templated; GO:0006396,RNA processing; GO:0048367,shoot system development	PF00013.29:KH domain
Cs1g03420	0.45	0.84	1.05	0.28	0.64	0.96	20	36	42	12	27	41	-0.286504	0.644442	0.775266	false	chr1	2628449	2630798	+	Cs1g03420	--	K15032 mTERF domain-containing protein, mitochondrial | (RefSeq) uncharacterized LOC102610055 (A)	--	hypothetical protein CICLE_v10024277mg [Citrus clementina]	RecName: Full=Transcription termination factor MTEF18, mitochondrial {ECO:0000305}; AltName: Full=Mitochondrial transcription termination factor 18 {ECO:0000303|PubMed:23087700}; AltName: Full=Protein SUPPRESSOR OF HOT1-4 1 {ECO:0000303|PubMed:22942382}; Flags: Precursor;	SubName: Full=Uncharacterized protein {ECO:0000313|EMBL:ESR58629.1};	Mitochondrial transcription termination factor, mTERF	GO:0009507,chloroplast; GO:0005739,mitochondrion; GO:0003690,double-stranded DNA binding; GO:0019843,rRNA binding; GO:0003727,single-stranded RNA binding; GO:0009658,chloroplast organization; GO:0032502,developmental process; GO:0006353,DNA-templated transcription, termination; GO:0007005,mitochondrion organization; GO:0006355,regulation of transcription, DNA-templated; GO:0042255,ribosome assemb…	PF02536.14:mTERF
Cs1g03430	2.41	3.73	3.05	3.21	2.81	2.86	102	150	115	129	112	115	-0.0195817	0.941309	0.968351	false	chr1	2635485	2640247	+	Cs1g03430	--	--	--	hypothetical protein CICLE_v10021338mg [Citrus clementina]	--	SubName: Full=Uncharacterized protein {ECO:0000313|EMBL:ESR58628.1};	--	--	PF07797.14:Protein of unknown function (DUF1639)
Cs1g03450	5.04	5.36	5.8	5.06	6.38	6.21	236	239	242	225	282	277	0.14963	0.426778	0.600691	false	chr1	2642564	2646635	-	Cs1g03450	--	K17796 mitochondrial import inner membrane translocase subunit TIM21 | (RefSeq) probable mitochondrial import inner membrane translocase subunit TIM21 (A)	--	hypothetical protein CICLE_v10021461mg [Citrus clementina]	RecName: Full=Probable mitochondrial import inner membrane translocase subunit TIM21; AltName: Full=Protein SEGREGATION DISTORTION 3; Flags: Precursor;	SubName: Full=Uncharacterized protein {ECO:0000313|EMBL:ESR58623.1};	Uncharacterized conserved protein	GO:0016021,integral component of membrane; GO:0005744,TIM23 mitochondrial import inner membrane translocase complex; GO:0005739,mitochondrion; GO:0032981,mitochondrial respiratory chain complex I assembly; GO:0033617,mitochondrial respiratory chain complex IV assembly; GO:0030150,protein import into mitochondrial matrix; GO:0090351,seedling development	PF08294.11:TIM21
Cs1g03460	4.85	6.22	5.04	6.79	5.55	6.53	280	342	259	372	302	359	0.257155	0.207897	0.363945	false	chr1	2649200	2652891	+	Cs1g03460	--	--	--	hypothetical protein CICLE_v10018658mg [Citrus clementina]	--	SubName: Full=Uncharacterized protein {ECO:0000313|EMBL:ESR58620.1};	--	GO:0008270,zinc ion binding	--
Cs1g03480	18.56	13.26	21.54	10.87	11.62	12.3	547	372	565	304	323	345	-0.592807	0.0160988	0.0526739	false	chr1	2655293	2657650	-	Cs1g03480	--	--	--	hypothetical protein CICLE_v10021618mg [Citrus clementina]	--	SubName: Full=Uncharacterized protein {ECO:0000313|EMBL:ESR58618.1};	Predicted phosphoglycerate mutase	--	PF00300.22:Histidine phosphatase superfamily (branch 1)
Cs1g03500	72.72	74.08	65.5	97.6	88.21	94.96	3101	3008	2487	3951	3547	3855	0.429983	0.00132975	0.00686183	false	chr1	2661395	2665676	+	Cs1g03500	--	K09503 DnaJ homolog subfamily A member 2 | (RefSeq) dnaJ protein homolog 2 (A)	ko04141: Protein processing in endoplasmic reticulum	hypothetical protein CICLE_v10020330mg [Citrus clementina]	RecName: Full=Chaperone protein dnaJ A6 {ECO:0000305}; Short=OsDjA6 {ECO:0000303|PubMed:23160806};	SubName: Full=Uncharacterized protein {ECO:0000313|EMBL:ESR58616.1};	Molecular chaperone (DnaJ superfamily)	GO:0005737,cytoplasm; GO:0005634,nucleus; GO:0005524,ATP binding; GO:0031072,heat shock protein binding; GO:0046872,metal ion binding; GO:0051082,unfolded protein binding; GO:0006952,defense response; GO:0006457,protein folding; GO:0009408,response to heat; GO:0016032,viral process	PF01556.18:DnaJ C terminal domain
Cs1g03510	1.7	0.44	0.93	0.48	0.18	0.26	41	10	20	11	4	6	-1.71876	0.0335691	0.0942599	false	chr1	2671442	2672704	+	Cs1g03510	--	K09286 EREBP-like factor | (RefSeq) dehydration-responsive element-binding protein 3 (A)	--	hypothetical protein CICLE_v10021740mg [Citrus clementina]	RecName: Full=Ethylene-responsive transcription factor ERF034;	SubName: Full=Uncharacterized protein {ECO:0000313|EMBL:GAY41867.1};	--	GO:0005634,nucleus; GO:0003700,DNA-binding transcription factor activity; GO:0044212,transcription regulatory region DNA binding; GO:0009873,ethylene-activated signaling pathway; GO:0006351,transcription, DNA-templated	PF00847.20:AP2 domain
Cs1g03520	16.79	17.77	15.96	28.36	25.27	25.59	1502	1514	1271	2409	2132	2180	0.676391	5.60142e-07	7.22349e-06	false	chr1	2679071	2689796	-	Cs1g03520	--	K10696 E3 ubiquitin-protein ligase BRE1 [EC:2.3.2.27] | (RefSeq) E3 ubiquitin-protein ligase BRE1-like 1 (A)	--	PREDICTED: E3 ubiquitin-protein ligase BRE1-like 1 [Citrus sinensis]	RecName: Full=E3 ubiquitin-protein ligase BRE1-like 1; Short=AtBRE1; EC=2.3.2.27 {ECO:0000269|PubMed:17329563, ECO:0000269|PubMed:17329565}; AltName: Full=Protein HISTONE MONOUBIQUITINATION 1; Short=AtHUB1; AltName: Full=Protein REDUCED DORMANCY 4 {ECO:0000303|PubMed:21799800}; AltName: Full=RING-type E3 ubiquitin transferase BRE1-like 1 {ECO:0000305};	SubName: Full=Uncharacterized protein {ECO:0000313|EMBL:GAY41870.1};	E3 ubiquitin ligase involved in syntaxin degradation	GO:0005739,mitochondrion; GO:0005634,nucleus; GO:0046872,metal ion binding; GO:0042803,protein homodimerization activity; GO:0004842,ubiquitin-protein transferase activity; GO:0051301,cell division; GO:0009817,defense response to fungus, incompatible interaction; GO:0033523,histone H2B ubiquitination; GO:0010390,histone monoubiquitination; GO:0045087,innate immune response; GO:0009965,leaf morpho…	PF13920.6:Zinc finger, C3HC4 type (RING finger)
Cs1g03530	21.34	16.76	18.46	21.91	21.77	22.17	841	629	648	820	809	832	0.243417	0.149106	0.286224	false	chr1	2691549	2695429	-	Cs1g03530	--	--	--	hypothetical protein CICLE_v10019862mg [Citrus clementina]	--	SubName: Full=Uncharacterized protein {ECO:0000313|EMBL:GAY41873.1};	--	--	PF11187.8:Protein of unknown function (DUF2974)
Cs1g03550	2.31	1.97	2.42	2.56	2.33	2.21	148	120	138	156	141	135	0.112984	0.614553	0.753056	false	chr1	2700059	2708742	-	Cs1g03550	--	K20092 chromodomain-helicase-DNA-binding protein 1-like [EC:3.6.4.12] | (RefSeq) probable helicase CHR10 (A)	--	PREDICTED: probable helicase CHR10 isoform X1 [Citrus sinensis]	RecName: Full=Probable helicase CHR10 {ECO:0000305}; EC=3.6.4.- {ECO:0000305}; AltName: Full=Protein ALTERED SEED GERMINATION 3 {ECO:0000305}; AltName: Full=Protein CHROMATIN REMODELING 10 {ECO:0000305};	SubName: Full=Uncharacterized protein {ECO:0000313|EMBL:ESR58606.1};	Chromatin remodeling complex WSTF-ISWI, small subunit	GO:0005634,nucleus; GO:0005524,ATP binding; GO:0003677,DNA binding; GO:0004386,helicase activity; GO:0016569,covalent chromatin modification; GO:0006355,regulation of transcription, DNA-templated; GO:0006351,transcription, DNA-templated	PF00176.23:SNF2 family N-terminal domain
Cs1g03560	6.79	7.13	7.32	4.72	7.18	7.91	429	429	412	283	428	476	-0.0767507	0.753239	0.85129	false	chr1	2719052	2723955	+	Cs1g03560	--	K14306 nuclear pore complex protein Nup62 | (RefSeq) nuclear pore complex protein NUP62 (A)	ko03013: RNA transport	hypothetical protein CICLE_v10019079mg [Citrus clementina]	RecName: Full=Nuclear pore complex protein NUP62 {ECO:0000303|PubMed:21189294}; AltName: Full=Nucleoporin 62 {ECO:0000312|EMBL:AEC10495.1}; Short=NP62; AltName: Full=Protein EMBRYO DEFECTIVE 2766;	SubName: Full=Uncharacterized protein {ECO:0000313|EMBL:ESR58604.1};	Nuclear porin	GO:0005829,cytosol; GO:0005635,nuclear envelope; GO:0034399,nuclear periphery; GO:0044613,nuclear pore central transport channel; GO:0005487,NA; GO:0005543,phospholipid binding; GO:0017056,structural constituent of nuclear pore; GO:0051028,mRNA transport; GO:0010930,negative regulation of auxin mediated signaling pathway; GO:0006606,protein import into nucleus; GO:0071426,ribonucleoprotein comple…	PF05064.13:Nsp1-like C-terminal region
Cs1g03570	2.85	2.71	2.49	4.75	3.08	3.1	140	127	109	222	143	145	0.470693	0.10333	0.220097	false	chr1	2723216	2725863	-	Cs1g03570	--	--	--	hypothetical protein CICLE_v10021662mg [Citrus clementina]	--	SubName: Full=Uncharacterized protein {ECO:0000313|EMBL:ESR58601.1};	--	--	--
Cs1g03580	0.62	1.26	0.65	0.33	1.07	0.41	16	31	15	8	26	10	-0.472317	0.502784	0.667365	false	chr1	2728130	2730092	+	Cs1g03580	--	--	--	PREDICTED: cell number regulator 6 isoform X1 [Citrus sinensis]	RecName: Full=Cell number regulator 6; AltName: Full=ZmCNR06;	SubName: Full=Uncharacterized protein {ECO:0000313|EMBL:ESR58598.1};	--	GO:0016021,integral component of membrane	PF04749.17:PLAC8 family
Cs1g03590	12.3	14.99	12.92	10.73	13.49	15.03	839	974	785	695	868	976	-0.00917086	0.962092	0.979337	false	chr1	2730311	2736784	+	Cs1g03590	--	K02355 elongation factor G | (RefSeq) elongation factor G-2, mitochondrial (A)	--	hypothetical protein CICLE_v10018974mg [Citrus clementina]	RecName: Full=Elongation factor G-2, mitochondrial; Short=EF-Gmt {ECO:0000255|HAMAP-Rule:MF_03061}; Short=mEF-G 1-2 {ECO:0000255|HAMAP-Rule:MF_03061}; AltName: Full=Elongation factor G1-2 {ECO:0000255|HAMAP-Rule:MF_03061};	SubName: Full=Uncharacterized protein {ECO:0000313|EMBL:GAY41881.1};	Mitochondrial elongation factor	GO:0005739,mitochondrion; GO:0005525,GTP binding; GO:0003924,GTPase activity; GO:0003746,translation elongation factor activity; GO:0070125,mitochondrial translational elongation; GO:0046686,response to cadmium ion	PF00009.27:Elongation factor Tu GTP binding domain
Cs1g03600	8.53	10.27	8.49	15.45	13.51	13.68	384	440	340	660	573	586	0.671678	0.000102332	0.000759028	false	chr1	2735538	2739738	-	Cs1g03600	--	K05605 3-hydroxyisobutyryl-CoA hydrolase [EC:3.1.2.4] | (RefSeq) 3-hydroxyisobutyryl-CoA hydrolase-like protein 1, mitochondrial (A)	ko00280: Valine, leucine and isoleucine degradation; ko00410: beta-Alanine metabolism; ko00640: Propanoate metabolism; ko01200: Carbon metabolism	hypothetical protein CICLE_v10020245mg [Citrus clementina]	RecName: Full=3-hydroxyisobutyryl-CoA hydrolase-like protein 1, mitochondrial; EC=3.1.2.-; Flags: Precursor;	SubName: Full=Uncharacterized protein {ECO:0000313|EMBL:ESR58594.1};	Enoyl-CoA hydratase	GO:0005739,mitochondrion; GO:0003860,3-hydroxyisobutyryl-CoA hydrolase activity	PF16113.5:Enoyl-CoA hydratase/isomerase
Cs1g03610	3.18	1.62	2.03	4.14	5.8	5.53	93	45	53	115	160	154	1.19632	0.000960534	0.00525546	up	chr1	2741173	2743727	+	Cs1g03610	--	K00025 malate dehydrogenase [EC:1.1.1.37] | (RefSeq) malate dehydrogenase, cytoplasmic-like (A)	ko00020: Citrate cycle (TCA cycle); ko00270: Cysteine and methionine metabolism; ko00620: Pyruvate metabolism; ko00630: Glyoxylate and dicarboxylate metabolism; ko00710: Carbon fixation in photosynthetic organisms; ko01200: Carbon metabolism	PREDICTED: malate dehydrogenase, cytoplasmic-like isoform X1 [Citrus sinensis]	RecName: Full=Malate dehydrogenase, cytoplasmic {ECO:0000303|Ref.1}; EC=1.1.1.37 {ECO:0000269|PubMed:23313174};	RecName: Full=Malate dehydrogenase {ECO:0000256|RuleBase:RU003405}; EC=1.1.1.37 {ECO:0000256|RuleBase:RU003405};	Malate dehydrogenase	GO:0005886,plasma membrane; GO:0030060,L-malate dehydrogenase activity; GO:0005975,carbohydrate metabolic process; GO:0006108,malate metabolic process; GO:0006099,tricarboxylic acid cycle	PF02866.18:lactate/malate dehydrogenase, alpha/beta C-terminal domain
Cs1g03620	11.66	14.75	11.17	14.92	16.11	16.26	681	820	581	827	887	904	0.358023	0.0362619	0.100268	false	chr1	2744652	2749738	+	Cs1g03620	--	--	--	hypothetical protein CICLE_v10022588mg [Citrus clementina]	--	SubName: Full=Uncharacterized protein {ECO:0000313|EMBL:ESR58591.1};	--	--	--
Cs1g03630	0.76	0.02	0.75	0.17	0.34	0.07	33	1	29	7	14	3	-1.38468	0.23472	0.397623	false	chr1	2751557	2754103	+	Cs1g03630	--	--	--	hypothetical protein CICLE_v10021106mg [Citrus clementina]	RecName: Full=Squamosa promoter-binding-like protein 8;	SubName: Full=Uncharacterized protein {ECO:0000313|EMBL:KDO85636.1};	--	GO:0005737,cytoplasm; GO:0005634,nucleus; GO:0003677,DNA binding; GO:0046872,metal ion binding; GO:0048653,anther development; GO:0030154,cell differentiation; GO:0009554,megasporogenesis; GO:0009556,microsporogenesis; GO:0006355,regulation of transcription, DNA-templated; GO:0006351,transcription, DNA-templated	PF03110.14:SBP domain
Cs1g03670	0.1	0.14	0.2	0.41	0.27	0.68	5	7	9	20	13	33	1.6687	0.0165401	0.0538538	false	chr1	2801603	2804267	+	Cs1g03670	--	--	--	PREDICTED: uncharacterized protein LOC102617005 [Citrus sinensis]	--	SubName: Full=Uncharacterized protein {ECO:0000313|EMBL:ESR41242.1};	--	GO:0016021,integral component of membrane	PF13968.6:Domain of unknown function (DUF4220)
Cs1g03680	0.07	0.23	0.02	1.06	0.42	0.6	3	10	1	46	18	26	2.73197	0.00199018	0.00958773	up	chr1	2807132	2809531	+	Cs1g03680	--	K13459 disease resistance protein RPS2 | (RefSeq) probable disease resistance protein At5g63020 (A)	ko04626: Plant-pathogen interaction	hypothetical protein CICLE_v10025017mg [Citrus clementina]	RecName: Full=Disease resistance RPP13-like protein 4; AltName: Full=Disease resistance protein ZAR1 {ECO:0000305}; AltName: Full=Protein HOPZ-ACTIVATED RESISTANCE 1;	SubName: Full=Uncharacterized protein {ECO:0000313|EMBL:GAY66402.1};	--	GO:0005886,plasma membrane; GO:0043531,ADP binding; GO:0005524,ATP binding; GO:0043621,protein self-association; GO:0006952,defense response; GO:0050829,defense response to Gram-negative bacterium; GO:0007165,signal transduction	PF13855.6:Leucine rich repeat
Cs1g03690	0.38	0.77	0.58	0.23	0.12	0.26	17	33	23	10	5	11	-1.46437	0.0208692	0.0648343	false	chr1	2814591	2816939	+	Cs1g03690	--	K13459 disease resistance protein RPS2 | (RefSeq) probable disease resistance protein At4g27220 (A)	ko04626: Plant-pathogen interaction	PREDICTED: putative disease resistance protein At4g19050 [Citrus sinensis]	RecName: Full=Putative disease resistance protein At4g19050;	SubName: Full=Uncharacterized protein {ECO:0000313|EMBL:KDO59884.1};	--	GO:0005886,plasma membrane; GO:0043531,ADP binding; GO:0005524,ATP binding; GO:0006952,defense response; GO:0007165,signal transduction	PF12799.7:Leucine Rich repeats (2 copies)
Cs1g03700	17.46	22.66	14.66	2.62	7.48	4.55	963	1190	720	137	389	239	-1.88457	1.69747e-06	1.98947e-05	down	chr1	2825215	2829218	+	Cs1g03700	--	K22048 mechanosensitive ion channel protein 4/5/6/7/8/9/10 | (RefSeq) mechanosensitive ion channel protein 10-like (A)	--	hypothetical protein CICLE_v10025168mg [Citrus clementina]	RecName: Full=Mechanosensitive ion channel protein 10; AltName: Full=Mechanosensitive channel of small conductance-like 10; AltName: Full=MscS-Like protein 10; Short=AtMSL10;	SubName: Full=Uncharacterized protein {ECO:0000313|EMBL:ESR41239.1};	Predicted mechanosensitive ion channel	GO:0016021,integral component of membrane; GO:0005886,plasma membrane; GO:0008381,mechanosensitive ion channel activity; GO:0006820,anion transport; GO:0050982,detection of mechanical stimulus; GO:0010150,leaf senescence; GO:0097468,programmed cell death in response to reactive oxygen species	PF00924.18:Mechanosensitive ion channel
Cs1g03720	0.87	1.7	0.74	0.62	1.07	0.79	37	69	28	25	43	32	-0.39201	0.431338	0.604628	false	chr1	2881044	2884087	+	Cs1g03720	--	K22048 mechanosensitive ion channel protein 4/5/6/7/8/9/10 | (RefSeq) mechanosensitive ion channel protein 10-like (A)	--	PREDICTED: mechanosensitive ion channel protein 10-like isoform X1 [Citrus sinensis]	RecName: Full=Mechanosensitive ion channel protein 10; AltName: Full=Mechanosensitive channel of small conductance-like 10; AltName: Full=MscS-Like protein 10; Short=AtMSL10;	SubName: Full=Uncharacterized protein {ECO:0000313|EMBL:GAY65391.1};	Predicted mechanosensitive ion channel	GO:0016021,integral component of membrane; GO:0005886,plasma membrane; GO:0008381,mechanosensitive ion channel activity; GO:0006820,anion transport; GO:0050982,detection of mechanical stimulus; GO:0010150,leaf senescence; GO:0097468,programmed cell death in response to reactive oxygen species	PF00924.18:Mechanosensitive ion channel
Cs1g03730	1.22	2.53	0.87	1.21	1.65	1.79	33	65	21	31	42	46	0.0349817	0.946758	0.970963	false	chr1	2925691	2927232	-	Cs1g03730	--	K12644 acridone synthase [EC:2.3.1.159] | (RefSeq) acridone synthase 2-like (A)	ko01058: Acridone alkaloid biosynthesis	hypothetical protein CICLE_v10025807mg [Citrus clementina]	RecName: Full=Acridone synthase 2; EC=2.3.1.159; AltName: Full=Acridone synthase II;	SubName: Full=Uncharacterized protein {ECO:0000313|EMBL:ESR41231.1};	--	GO:0050635,acridone synthase activity; GO:0009813,flavonoid biosynthetic process	PF00195.19:Chalcone and stilbene synthases, N-terminal domain
Cs1g03780	13.95	28.22	15.4	30.27	20.98	38.71	232	447	228	478	329	613	0.67844	0.0714995	0.167407	false	chr1	3027807	3028908	+	Cs1g03780	--	K13066 caffeic acid 3-O-methyltransferase [EC:2.1.1.68] | (RefSeq) caffeic acid 3-O-methyltransferase-like isoform X1 (A)	ko00940: Phenylpropanoid biosynthesis	PREDICTED: caffeic acid 3-O-methyltransferase-like isoform X2 [Citrus sinensis]	RecName: Full=Caffeic acid 3-O-methyltransferase; Short=CAOMT; Short=COMT; EC=2.1.1.68; AltName: Full=S-adenosysl-L-methionine:caffeic acid 3-O-methyltransferase;	SubName: Full=Uncharacterized protein {ECO:0000313|EMBL:ESR41229.1};	Hydroxyindole-O-methyltransferase and related SAM-dependent methyltransferases	GO:0047763,caffeate O-methyltransferase activity; GO:0046983,protein dimerization activity; GO:0009809,lignin biosynthetic process	PF00891.18:O-methyltransferase domain
Cs1g03800	14.89	38.6	16.54	54.73	25.42	38.6	367	906	363	1281	591	906	0.801693	0.0788576	0.179715	false	chr1	3031594	3033662	+	Cs1g03800	--	K13066 caffeic acid 3-O-methyltransferase [EC:2.1.1.68] | (RefSeq) caffeic acid 3-O-methyltransferase-like isoform X1 (A)	ko00940: Phenylpropanoid biosynthesis	PREDICTED: caffeic acid 3-O-methyltransferase-like isoform X1 [Citrus sinensis]	RecName: Full=Caffeic acid 3-O-methyltransferase; Short=CAOMT; Short=COMT; EC=2.1.1.68; AltName: Full=S-adenosysl-L-methionine:caffeic acid 3-O-methyltransferase;	SubName: Full=Uncharacterized protein {ECO:0000313|EMBL:GAY35183.1};	Hydroxyindole-O-methyltransferase and related SAM-dependent methyltransferases	GO:0047763,caffeate O-methyltransferase activity; GO:0046983,protein dimerization activity; GO:0009809,lignin biosynthetic process	PF00891.18:O-methyltransferase domain
Cs1g03820	0.48	0.51	0.6	0.75	0.46	0.59	19	19	21	28	17	22	0.207147	0.669757	0.792696	false	chr1	3046750	3048815	-	Cs1g03820	--	K15402 fatty acid omega-hydroxylase [EC:1.14.-.-] | (RefSeq) cytochrome P450 86B1 (A)	ko00073: Cutin, suberine and wax biosynthesis	hypothetical protein CICLE_v10025412mg [Citrus clementina]	RecName: Full=Alkane hydroxylase MAH1 {ECO:0000303|PubMed:17905869}; EC=1.14.-.- {ECO:0000305|PubMed:17905869}; AltName: Full=Cytochrome P450 96A15 {ECO:0000305}; AltName: Full=Protein MID-CHAIN ALKANE HYDROXYLASE 1 {ECO:0000303|PubMed:17905869};	SubName: Full=Uncharacterized protein {ECO:0000313|EMBL:ESR41227.1};	Cytochrome P450 CYP4/CYP19/CYP26 subfamilies	GO:0005783,endoplasmic reticulum; GO:0005789,endoplasmic reticulum membrane; GO:0016021,integral component of membrane; GO:0020037,heme binding; GO:0005506,iron ion binding; GO:0080133,midchain alkane hydroxylase activity; GO:0010025,wax biosynthetic process	PF00067.22:Cytochrome P450
Cs1g03860	21.47	20.7	28.3	20.55	20.15	19.24	755	693	886	686	668	644	-0.20684	0.278394	0.450345	false	chr1	3078957	3084326	-	Cs1g03860	--	K07933 Rab-like protein 3 | (RefSeq) uncharacterized GTP-binding protein At5g64813 (A)	--	hypothetical protein CICLE_v10026038mg [Citrus clementina]	RecName: Full=Small GTPase LIP1 {ECO:0000303|PubMed:17683937}; AltName: Full=Protein LIGHT INSENSITIVE PERIOD 1 {ECO:0000303|PubMed:17683937};	SubName: Full=Uncharacterized protein {ECO:0000313|EMBL:ESR41223.1};	--	GO:0005737,cytoplasm; GO:0005634,nucleus; GO:0005525,GTP binding; GO:0003924,GTPase activity; GO:0032922,circadian regulation of gene expression; GO:0009640,photomorphogenesis	PF00071.22:Ras family
Cs1g03870	19.11	38.56	34.31	12.05	15.48	6.64	127	244	203	76	97	42	-1.40096	0.0010579	0.00566178	down	chr1	3087282	3091014	-	Cs1g03870	--	K18835 WRKY transcription factor 2 | (RefSeq) probable WRKY transcription factor 2 (A)	ko04626: Plant-pathogen interaction	hypothetical protein CICLE_v10026733mg [Citrus clementina]	RecName: Full=Probable WRKY transcription factor 51; AltName: Full=WRKY DNA-binding protein 51;	SubName: Full=Uncharacterized protein {ECO:0000313|EMBL:ESR41219.1};	--	GO:0005634,nucleus; GO:0003700,DNA-binding transcription factor activity; GO:0043565,sequence-specific DNA binding; GO:0042742,defense response to bacterium; GO:0050832,defense response to fungus; GO:0009867,jasmonic acid mediated signaling pathway; GO:0006351,transcription, DNA-templated	PF03106.15:WRKY DNA -binding domain
Cs1g03880	7.41	12.32	14.29	3.64	8.64	3.11	60	95	103	28	66	24	-1.12165	0.0300341	0.0865316	false	chr1	3091125	3091548	-	Cs1g03880	--	--	--	hypothetical protein CISIN_1g0292571mg, partial [Citrus sinensis]	--	SubName: Full=Uncharacterized protein {ECO:0000313|EMBL:KDO45863.1}; Flags: Fragment;	--	GO:0003700,DNA-binding transcription factor activity; GO:0043565,sequence-specific DNA binding	--
Cs1g03900	36.31	30.59	32.16	41.23	41.08	38.14	733	588	578	790	782	733	0.306275	0.0492539	0.127129	false	chr1	3108983	3110382	+	Cs1g03900	--	K22063 iron-sulfur cluster assembly 1 | (RefSeq) iron-sulfur assembly protein IscA, chloroplastic (A)	--	hypothetical protein CICLE_v10026609mg [Citrus clementina]	RecName: Full=Iron-sulfur assembly protein IscA, chloroplastic; AltName: Full=Plastid SufA-like protein; AltName: Full=Protein scaffold protein AtCpIscA; Flags: Precursor;	SubName: Full=Uncharacterized protein {ECO:0000313|EMBL:ESR41217.1};	Fe-S cluster biosynthesis protein ISA1 (contains a HesB-like domain)	GO:0009570,chloroplast stroma; GO:0005759,mitochondrial matrix; GO:0051537,2 iron, 2 sulfur cluster binding; GO:0008198,ferrous iron binding; GO:0005198,structural molecule activity; GO:0016226,iron-sulfur cluster assembly; GO:0097428,protein maturation by iron-sulfur cluster transfer	PF01521.20:Iron-sulphur cluster biosynthesis
Cs1g03920	6.25	3.19	2.76	2.87	2.04	3.24	140	68	55	61	43	69	-0.562292	0.218946	0.377959	false	chr1	3120196	3121368	-	Cs1g03920	--	--	--	hypothetical protein CISIN_1g018566mg [Citrus sinensis]	--	SubName: Full=Uncharacterized protein {ECO:0000313|EMBL:JAV45289.1};	--	--	--
Cs1g03940	0.8	0.67	0.16	0.85	0.65	0.37	34	27	6	34	26	15	0.215917	0.766268	0.858925	false	chr1	3151729	3153947	-	Cs1g03940	--	--	--	hypothetical protein CISIN_1g018566mg [Citrus sinensis]	--	SubName: Full=Uncharacterized protein {ECO:0000313|EMBL:JAV45289.1};	Ultrahigh sulfur keratin-associated protein	--	--
Cs1g03950	2.16	7.1	2.47	0.22	2.78	0.67	51	160	52	5	62	15	-1.6619	0.0607595	0.148554	false	chr1	3176551	3178439	-	Cs1g03950	--	K24028 salicylic acid 3-hydroxylase [EC:1.14.11.-] | (RefSeq) protein DOWNY MILDEW RESISTANCE 6 (A)	--	hypothetical protein CICLE_v10027018mg [Citrus clementina]	RecName: Full=Codeine O-demethylase; EC=1.14.11.32;	SubName: Full=Uncharacterized protein {ECO:0000313|EMBL:ESR41214.1};	Iron/ascorbate family oxidoreductases	GO:0102805,codeine O-demethylase activity; GO:0046872,metal ion binding; GO:0008168,methyltransferase activity; GO:0102803,thebane O-demethylase activity; GO:0009820,alkaloid metabolic process	PF03171.20:2OG-Fe(II) oxygenase superfamily
Cs1g03960	154.17	383.82	179.52	41.65	136.68	55.24	4219	10001	4374	1082	3527	1439	-1.5985	0.00181526	0.00890276	down	chr1	3190582	3192502	-	Cs1g03960	--	K05278 flavonol synthase [EC:1.14.11.23] | (RefSeq) flavonol synthase/flavanone 3-hydroxylase-like (A)	ko00941: Flavonoid biosynthesis	hypothetical protein CICLE_v10026001mg [Citrus clementina]	RecName: Full=Protein SRG1; Short=AtSRG1; AltName: Full=Protein SENESCENCE-RELATED GENE 1;	SubName: Full=Uncharacterized protein {ECO:0000313|EMBL:ESR41213.1};	Iron/ascorbate family oxidoreductases	GO:0046872,metal ion binding; GO:0016682,oxidoreductase activity, acting on diphenols and related substances as donors, oxygen as acceptor; GO:0010150,leaf senescence	PF14226.6:non-haem dioxygenase in morphine synthesis N-terminal
Cs1g03980	4.11	2.74	3.61	31.29	23.39	26.77	169	107	132	1220	906	1047	2.98669	7.15826e-33	8.22087e-31	up	chr1	3229396	3233930	+	Cs1g03980	--	K10999 cellulose synthase A [EC:2.4.1.12] | (RefSeq) cellulose synthase A catalytic subunit 7 [UDP-forming] (A)	--	PREDICTED: LOW QUALITY PROTEIN: cellulose synthase-like protein B4 [Citrus sinensis]	RecName: Full=Cellulose synthase-like protein B4; Short=AtCslB4; EC=2.4.1.-;	SubName: Full=Uncharacterized protein {ECO:0000313|EMBL:GAY58665.1};	--	GO:0005794,Golgi apparatus; GO:0000139,Golgi membrane; GO:0016021,integral component of membrane; GO:0005886,plasma membrane; GO:0016760,cellulose synthase (UDP-forming) activity; GO:0016759,cellulose synthase activity; GO:0071555,cell wall organization; GO:0030244,cellulose biosynthetic process; GO:0009833,plant-type primary cell wall biogenesis	PF03552.14:Cellulose synthase
Cs1g03990	3.01	3.14	4.46	2.72	3.06	2.44	208	207	275	179	200	161	-0.33922	0.179002	0.326884	false	chr1	3234414	3238172	-	Cs1g03990	--	--	--	PREDICTED: uncharacterized protein LOC102623574 [Citrus sinensis]	--	SubName: Full=Uncharacterized protein {ECO:0000313|EMBL:GAY58673.1};	--	--	PF03107.16:C1 domain
Cs1g04030	148.49	117.95	170.06	90.06	96.46	93.42	5490	4152	5598	3161	3363	3288	-0.616574	0.00111119	0.00590957	false	chr1	3294957	3298985	+	Cs1g04030	--	--	--	hypothetical protein CICLE_v10026373mg [Citrus clementina]	RecName: Full=Probable ATP synthase 24 kDa subunit, mitochondrial; Flags: Precursor;	SubName: Full=Uncharacterized protein {ECO:0000313|EMBL:ESR41196.1};	--	GO:0009507,chloroplast; GO:0016020,membrane; GO:0005753,mitochondrial proton-transporting ATP synthase complex; GO:0005739,mitochondrion; GO:0005730,nucleolus; GO:0045263,proton-transporting ATP synthase complex, coupling factor F(o); GO:0050897,cobalt ion binding; GO:0005507,copper ion binding; GO:0008270,zinc ion binding; GO:0009555,pollen development; GO:0015992,NA	PF15704.5:Mitochondrial ATP synthase subunit
Cs1g04060	8.37	10.09	10.34	9.96	10.34	12.25	653	749	718	737	760	909	0.203595	0.244355	0.409477	false	chr1	3301830	3314527	-	Cs1g04060	--	K14521 N-acetyltransferase 10 [EC:2.3.1.-] | (RefSeq) RNA cytidine acetyltransferase 1-like (A)	ko03008: Ribosome biogenesis in eukaryotes	PREDICTED: RNA cytidine acetyltransferase 1-like isoform X1 [Citrus sinensis]	RecName: Full=RNA cytidine acetyltransferase 1 {ECO:0000255|HAMAP-Rule:MF_03211}; EC=2.3.1.- {ECO:0000255|HAMAP-Rule:MF_03211}; AltName: Full=18S rRNA cytosine acetyltransferase 1 {ECO:0000255|HAMAP-Rule:MF_03211};	RecName: Full=RNA cytidine acetyltransferase {ECO:0000256|HAMAP-Rule:MF_03211}; EC=2.3.1.- {ECO:0000256|HAMAP-Rule:MF_03211}; AltName: Full=18S rRNA cytosine acetyltransferase {ECO:0000256|HAMAP-Rule:MF_03211};	Predicted P-loop ATPase fused to an acetyltransferase	GO:0030686,90S preribosome; GO:0005730,nucleolus; GO:0005524,ATP binding; GO:1990883,rRNA cytidine N-acetyltransferase activity; GO:0000049,tRNA binding; GO:0051392,tRNA N-acetyltransferase activity; GO:1904812,rRNA acetylation involved in maturation of SSU-rRNA; GO:0051391,tRNA acetylation; GO:0002101,tRNA wobble cytosine modification	PF13718.6:GNAT acetyltransferase 2
Cs1g04070	5.76	6.7	5.3	8.56	7.63	7.43	149	165	122	210	186	183	0.437768	0.0400741	0.108105	false	chr1	3314588	3317140	+	Cs1g04070	--	--	--	hypothetical protein CICLE_v10025951mg [Citrus clementina]	RecName: Full=protein SLOW GREEN 1, chloroplastic {ECO:0000303|PubMed:24420572}; Flags: Precursor;	SubName: Full=Uncharacterized protein {ECO:0000313|EMBL:ESR41194.1};	--	GO:0009507,chloroplast; GO:0009941,chloroplast envelope; GO:0009536,plastid; GO:0009658,chloroplast organization	PF07719.17:Tetratricopeptide repeat
Cs1g04080	1.59	0.44	1.39	2.88	2.61	2.06	64	17	50	110	99	79	1.1585	0.0256171	0.0762564	false	chr1	3317656	3320295	+	Cs1g04080	--	K09839 violaxanthin de-epoxidase [EC:1.23.5.1] | (RefSeq) VDE, CitVDE; violaxanthin de-epoxidase (A)	ko00906: Carotenoid biosynthesis	hypothetical protein CICLE_v10025312mg [Citrus clementina]	RecName: Full=Violaxanthin de-epoxidase, chloroplastic; EC=1.23.5.1; Flags: Precursor;	SubName: Full=Uncharacterized protein {ECO:0000313|EMBL:ESR41193.1};	--	GO:0009535,chloroplast thylakoid membrane; GO:0046422,violaxanthin de-epoxidase activity	PF07137.11:VDE lipocalin domain
Cs1g04100	4.93	5.12	5.2	6.09	5.87	4.95	180	178	169	211	202	172	0.175014	0.373675	0.548233	false	chr1	3323259	3329212	-	Cs1g04100	--	K10761 tRNA(His) guanylyltransferase [EC:2.7.7.79] | (RefSeq) tRNA(His) guanylyltransferase 2-like (A)	--	hypothetical protein CICLE_v10027573mg [Citrus clementina]	RecName: Full=tRNA(His) guanylyltransferase 2; EC=2.7.7.79;	SubName: Full=Uncharacterized protein {ECO:0000313|EMBL:ESR41191.1};	Uncharacterized conserved protein	GO:0005654,nucleoplasm; GO:0005525,GTP binding; GO:0000287,magnesium ion binding; GO:0008193,tRNA guanylyltransferase activity; GO:0006400,tRNA modification; GO:0008033,tRNA processing	PF04446.12:tRNAHis guanylyltransferase
Cs1g04110	0	0	0	2.8	2.84	4.03	0	0	0	101	102	146	9.32812	5.59269e-14	1.76777e-12	up	chr1	3330108	3332385	-	Cs1g04110	--	K19893 glucan endo-1,3-beta-glucosidase 5/6 [EC:3.2.1.39] | (RefSeq) glucan endo-1,3-beta-glucosidase 5 (A)	ko00500: Starch and sucrose metabolism	hypothetical protein CUMW_188890 [Citrus unshiu]	RecName: Full=Glucan endo-1,3-beta-glucosidase 8; EC=3.2.1.39; AltName: Full=(1->3)-beta-glucan endohydrolase 8; Short=(1->3)-beta-glucanase 8; AltName: Full=Beta-1,3-endoglucanase 8; Short=Beta-1,3-glucanase 8; Flags: Precursor;	SubName: Full=Uncharacterized protein {ECO:0000313|EMBL:GAY58685.1};	--	GO:0031225,anchored component of membrane; GO:0046658,anchored component of plasma membrane; GO:0048046,apoplast; GO:0005618,cell wall; GO:0005886,plasma membrane; GO:0009506,plasmodesma; GO:0042973,glucan endo-1,3-beta-D-glucosidase activity; GO:0004553,hydrolase activity, hydrolyzing O-glycosyl compounds; GO:0030247,polysaccharide binding; GO:0005975,carbohydrate metabolic process; GO:0006952,d…	PF00332.18:Glycosyl hydrolases family 17
Cs1g04115	14.81	14.17	15.26	13.17	12.16	11.4	314	286	288	265	243	230	-0.242446	0.158891	0.299625	false	chr1	3333983	3336240	+	Cs1g04115	--	--	--	--	--	--	--	--	--
Cs1g04120	4.11	4.96	4.31	6.02	6.23	6.72	802	920	748	1115	1146	1248	0.531785	0.000217808	0.0014743	false	chr1	3341925	3367207	-	Cs1g04120	--	K19026 spatacsin | (RefSeq) uncharacterized LOC102626916 (A)	--	PREDICTED: uncharacterized protein LOC102626916 [Citrus sinensis]	--	SubName: Full=Uncharacterized protein {ECO:0000313|EMBL:KDO50473.1};	Uncharacterized conserved protein	--	PF14649.6:Spatacsin C-terminus
Cs1g04130	18.95	19.78	20.28	21.02	20.47	19.78	490	487	467	516	499	487	0.0807572	0.550392	0.704348	false	chr1	3370485	3371838	-	Cs1g04130	--	--	--	hypothetical protein CICLE_v10026622mg [Citrus clementina]	RecName: Full=Zinc finger A20 and AN1 domain-containing stress-associated protein 9; Short=OsSAP9;	SubName: Full=Uncharacterized protein {ECO:0000313|EMBL:ESR41189.1};	Predicted Zn-finger protein	GO:0003677,DNA binding; GO:0008270,zinc ion binding	PF01754.16:A20-like zinc finger
Cs1g04150	0.77	0.93	0.43	0.87	1.52	1.74	14	16	7	15	26	30	0.9725	0.103485	0.220403	false	chr1	3437966	3438916	+	Cs1g04150	--	K13459 disease resistance protein RPS2 | (RefSeq) probable disease resistance protein At1g12280 (A)	ko04626: Plant-pathogen interaction	hypothetical protein CICLE_v10027454mg [Citrus clementina]	RecName: Full=Putative disease resistance protein At1g63350;	SubName: Full=Uncharacterized protein {ECO:0000313|EMBL:ESR41186.1};	Apoptotic ATPase	GO:0005886,plasma membrane; GO:0043531,ADP binding; GO:0005524,ATP binding; GO:0006952,defense response; GO:0007165,signal transduction	--
Cs1g04220	7.51	4.33	5.56	4.55	1.9	1.95	226	124	149	130	54	56	-1.02028	0.0285143	0.0831261	false	chr1	3625023	3626738	-	Cs1g04220	--	K20617 cytochrome P450 family 71 subfamily A | (RefSeq) cytochrome P450 71A9-like (A)	--	hypothetical protein CICLE_v10027382mg [Citrus clementina]	RecName: Full=Cytochrome P450 83B1; EC=1.14.14.45 {ECO:0000269|PubMed:12970475}; AltName: Full=Protein ALTERED TRYPTOPHAN REGULATION 4; AltName: Full=Protein RED ELONGATED 1; AltName: Full=Protein SUPERROOT 2;	SubName: Full=Uncharacterized protein {ECO:0000313|EMBL:ESR41179.1};	Cytochrome P450 CYP2 subfamily	GO:0005783,endoplasmic reticulum; GO:0016021,integral component of membrane; GO:0016020,membrane; GO:0005739,mitochondrion; GO:0005886,plasma membrane; GO:0020037,heme binding; GO:0005506,iron ion binding; GO:0016709,oxidoreductase activity, acting on paired donors, with incorporation or reduction of molecular oxygen, NAD(P)H as one donor, and incorporation of one atom of oxygen; GO:0048830,adven…	PF00067.22:Cytochrome P450
Cs1g04235	5.01	8.16	5.38	7.96	6.24	4.58	69	107	66	104	81	60	0.0472909	0.898149	0.942616	false	chr1	3641477	3643525	+	Cs1g04235	--	K07195 exocyst complex component 7 | (RefSeq) exocyst complex component EXO70B1-like (A)	--	PREDICTED: uncharacterized protein LOC102629778 [Citrus sinensis]	--	SubName: Full=Uncharacterized protein {ECO:0000313|EMBL:JAV45197.1};	--	--	--
Cs1g04240	11.56	11.82	8.34	27.03	12.05	12.55	419	408	269	930	412	433	0.735486	0.0596904	0.146631	false	chr1	3646670	3649055	-	Cs1g04240	--	K20617 cytochrome P450 family 71 subfamily A | (RefSeq) cytochrome P450 71A1-like (A)	--	PREDICTED: premnaspirodiene oxygenase-like [Citrus sinensis]	RecName: Full=Premnaspirodiene oxygenase; Short=HPO; EC=1.14.13.121; AltName: Full=Cytochrome P450 71D55;	SubName: Full=Uncharacterized protein {ECO:0000313|EMBL:ESR41177.1};	Cytochrome P450 CYP2 subfamily	GO:0016021,integral component of membrane; GO:0020037,heme binding; GO:0005506,iron ion binding; GO:0004497,monooxygenase activity; GO:0016705,oxidoreductase activity, acting on paired donors, with incorporation or reduction of molecular oxygen	PF00067.22:Cytochrome P450
Cs1g04260	11.85	6.23	8.21	6.93	7.98	5.62	326	163	201	181	207	147	-0.337876	0.304754	0.47886	false	chr1	3706425	3707864	+	Cs1g04260	--	K13065 shikimate O-hydroxycinnamoyltransferase [EC:2.3.1.133] | (RefSeq) vinorine synthase-like (A)	ko00940: Phenylpropanoid biosynthesis; ko00941: Flavonoid biosynthesis; ko00945: Stilbenoid, diarylheptanoid and gingerol biosynthesis	hypothetical protein CICLE_v10027530mg [Citrus clementina]	RecName: Full=Salutaridinol 7-O-acetyltransferase {ECO:0000303|PubMed:11404355}; Short=salAT {ECO:0000303|PubMed:11404355}; EC=2.3.1.150 {ECO:0000269|PubMed:11404355, ECO:0000269|PubMed:8537369};	SubName: Full=Uncharacterized protein {ECO:0000313|EMBL:GAY68404.1};	--	GO:0047180,salutaridinol 7-O-acetyltransferase activity; GO:0009820,alkaloid metabolic process	PF02458.15:Transferase family
Cs1g04290	48.24	27.13	35.2	50.67	49.69	31.76	1042	558	677	1039	1012	653	0.277649	0.377777	0.552135	false	chr1	3738343	3739616	+	Cs1g04290	--	K13065 shikimate O-hydroxycinnamoyltransferase [EC:2.3.1.133] | (RefSeq) vinorine synthase-like (A)	ko00940: Phenylpropanoid biosynthesis; ko00941: Flavonoid biosynthesis; ko00945: Stilbenoid, diarylheptanoid and gingerol biosynthesis	PREDICTED: salutaridinol 7-O-acetyltransferase-like [Citrus sinensis]	RecName: Full=Salutaridinol 7-O-acetyltransferase {ECO:0000303|PubMed:11404355}; Short=salAT {ECO:0000303|PubMed:11404355}; EC=2.3.1.150 {ECO:0000269|PubMed:11404355, ECO:0000269|PubMed:8537369};	SubName: Full=Uncharacterized protein {ECO:0000313|EMBL:GAY54728.1};	--	GO:0047180,salutaridinol 7-O-acetyltransferase activity; GO:0009820,alkaloid metabolic process	PF02458.15:Transferase family
Cs1g04300	12.76	8.36	13.11	13.1	14.04	11.61	351	219	321	342	364	304	0.201437	0.431234	0.604627	false	chr1	3752299	3753738	+	Cs1g04300	--	K13065 shikimate O-hydroxycinnamoyltransferase [EC:2.3.1.133] | (RefSeq) vinorine synthase-like (A)	ko00940: Phenylpropanoid biosynthesis; ko00941: Flavonoid biosynthesis; ko00945: Stilbenoid, diarylheptanoid and gingerol biosynthesis	PREDICTED: vinorine synthase-like [Citrus sinensis]	RecName: Full=Salutaridinol 7-O-acetyltransferase {ECO:0000303|PubMed:11404355}; Short=salAT {ECO:0000303|PubMed:11404355}; EC=2.3.1.150 {ECO:0000269|PubMed:11404355, ECO:0000269|PubMed:8537369};	SubName: Full=Uncharacterized protein {ECO:0000313|EMBL:ESR41173.1};	--	GO:0047180,salutaridinol 7-O-acetyltransferase activity; GO:0009820,alkaloid metabolic process	PF02458.15:Transferase family
Cs1g04340	7.14	4.59	9.33	2.21	2.19	2.09	566	346	658	166	164	158	-1.67215	7.7618e-08	1.15766e-06	down	chr1	3783069	3787218	-	Cs1g04340	--	K13415 protein brassinosteroid insensitive 1 [EC:2.7.10.1 2.7.11.1] | (RefSeq) protein BRASSINOSTEROID INSENSITIVE 1 (A)	ko04075: Plant hormone signal transduction	hypothetical protein CICLE_v10024737mg [Citrus clementina]	RecName: Full=Protein BRASSINOSTEROID INSENSITIVE 1 {ECO:0000303|PubMed:9298904}; Short=AtBRI1 {ECO:0000303|PubMed:9298904}; EC=2.7.10.1 {ECO:0000305}; EC=2.7.11.1 {ECO:0000305}; AltName: Full=Brassinosteroid LRR receptor kinase {ECO:0000303|PubMed:9298904}; Flags: Precursor;	SubName: Full=Uncharacterized protein {ECO:0000313|EMBL:ESR41172.1};	--	GO:0005768,endosome; GO:0010008,endosome membrane; GO:0016021,integral component of membrane; GO:0005886,plasma membrane; GO:0005524,ATP binding; GO:0042802,identical protein binding; GO:0046982,protein heterodimerization activity; GO:0042803,protein homodimerization activity; GO:0004672,protein kinase activity; GO:0004674,protein serine/threonine kinase activity; GO:0005496,steroid binding; GO:0…	PF00069.25:Protein kinase domain
Cs1g04350	31.81	34.75	27.94	65.88	70.17	78.53	500	520	391	983	1040	1175	1.20873	6.05183e-13	1.74239e-11	up	chr1	3801470	3803614	-	Cs1g04350	--	K15285 solute carrier family 35, member E3 | (RefSeq) uncharacterized membrane protein At1g06890 (A)	--	hypothetical protein CICLE_v10027192mg, partial [Citrus clementina]	RecName: Full=UDP-rhamnose/UDP-galactose transporter 5 {ECO:0000312|EMBL:AKA88218.1}; Short=UDP-Rha/UDP-Gal transporter 5 {ECO:0000303|PubMed:25053812}; AltName: Full=Bi-functional UDP-rhamnose/UDP-galactose transporter {ECO:0000312|EMBL:AIJ01999.1};	SubName: Full=Uncharacterized protein {ECO:0000313|EMBL:ESR41170.1}; Flags: Fragment;	Glucose-6-phosphate/phosphate and phosphoenolpyruvate/phosphate antiporter	GO:0005794,Golgi apparatus; GO:0000139,Golgi membrane; GO:0016021,integral component of membrane; GO:0015297,antiporter activity; GO:0005338,nucleotide-sugar transmembrane transporter activity; GO:0022857,transmembrane transporter activity; GO:0008643,carbohydrate transport; GO:0090480,purine nucleotide-sugar transmembrane transport	PF03151.16:Triose-phosphate Transporter family
Cs1g04360	50.29	55.26	45.65	92.81	67.96	70.2	605	633	489	1060	771	804	0.640172	0.00241126	0.0113054	false	chr1	3815973	3819317	+	Cs1g04360	--	--	--	hypothetical protein CICLE_v10026489mg [Citrus clementina]	--	SubName: Full=Uncharacterized protein {ECO:0000313|EMBL:GAY60230.1};	--	--	PF15251.6:Domain of unknown function (DUF4588)
Cs1g04370	1.97	2.02	2.75	2.44	2.54	2.6	75	73	93	88	91	94	0.197485	0.469776	0.638476	false	chr1	3820425	3825792	+	Cs1g04370	--	--	--	hypothetical protein CICLE_v10025563mg [Citrus clementina]	RecName: Full=TSL-kinase interacting protein 1; AltName: Full=Myb-related protein TKI1;	SubName: Full=Uncharacterized protein {ECO:0000313|EMBL:ESR41168.1};	--	GO:0005634,nucleus; GO:0003682,chromatin binding; GO:0003677,DNA binding; GO:0006355,regulation of transcription, DNA-templated; GO:0006351,transcription, DNA-templated	--
Cs1g04380	0.5	0.69	1	25.8	27.58	39.79	17	22	30	825	876	1276	5.44605	3.58471e-58	9.88042e-56	up	chr1	3827054	3830910	+	Cs1g04380	--	K08819 cyclin-dependent kinase 12/13 [EC:2.7.11.22 2.7.11.23] | (RefSeq) probable serine/threonine-protein kinase At1g54610 (A)	--	PREDICTED: probable serine/threonine-protein kinase At1g54610 [Citrus sinensis]	RecName: Full=Probable serine/threonine-protein kinase At1g54610; EC=2.7.11.1;	SubName: Full=Uncharacterized protein {ECO:0000313|EMBL:GAY60233.1};	Cdc2-related protein kinase	GO:0005634,nucleus; GO:0005524,ATP binding; GO:0004693,cyclin-dependent protein serine/threonine kinase activity; GO:0006468,protein phosphorylation	PF00069.25:Protein kinase domain
Cs1g04390	5.72	6.8	5.94	7.8	7.03	6.29	401	454	371	519	465	420	0.221924	0.212677	0.369793	false	chr1	3831585	3842821	-	Cs1g04390	--	K15202 general transcription factor 3C polypeptide 5 (transcription factor C subunit 1) | (RefSeq) general transcription factor 3C polypeptide 5-like (A)	--	PREDICTED: general transcription factor 3C polypeptide 5-like [Citrus sinensis]	--	SubName: Full=Uncharacterized protein {ECO:0000313|EMBL:GAY60236.1};	RNA polymerase III transcription factor (TF)IIIC subunit	--	PF09734.9:RNA polymerase III transcription factor (TF)IIIC subunit HTH domain
Cs1g04400	4.45	6.34	5.15	3.24	3.69	2.86	165	224	170	114	129	101	-0.676566	0.00618436	0.0244489	false	chr1	3847068	3853899	-	Cs1g04400	--	K10882 crossover junction endonuclease EME1 [EC:3.1.22.-] | (RefSeq) crossover junction endonuclease EME1B-like (A)	ko03440: Homologous recombination	hypothetical protein CICLE_v10025290mg [Citrus clementina]	RecName: Full=Crossover junction endonuclease EME1B; EC=3.1.22.-; AltName: Full=Essential meiotic endonuclease 1B; Short=AtEME1B;	SubName: Full=Uncharacterized protein {ECO:0000313|EMBL:ESR41162.1};	--	GO:0048476,Holliday junction resolvase complex; GO:0005634,nucleus; GO:0003677,DNA binding; GO:0004519,endonuclease activity; GO:0046872,metal ion binding; GO:0051301,cell division; GO:0006310,DNA recombination; GO:0006281,DNA repair; GO:0051321,meiotic cell cycle	PF02732.15:ERCC4 domain
Cs1g04430	9.89	12.49	9.89	16.41	15.56	14.78	327	393	291	515	485	465	0.562428	0.00165029	0.00820524	false	chr1	3881297	3886014	-	Cs1g04430	--	K11851 ubiquitin carboxyl-terminal hydrolase 30 [EC:3.4.19.12] | (RefSeq) ubiquitin carboxyl-terminal hydrolase 27 (A)	--	hypothetical protein CICLE_v10025253mg [Citrus clementina]	RecName: Full=Ubiquitin carboxyl-terminal hydrolase 27; EC=3.4.19.12; AltName: Full=Deubiquitinating enzyme 27; Short=AtUBP27; AltName: Full=Ubiquitin thioesterase 27; AltName: Full=Ubiquitin-specific-processing protease 27;	SubName: Full=Uncharacterized protein {ECO:0000313|EMBL:ESR41158.1};	Ubiquitin C-terminal hydrolase	GO:0016021,integral component of membrane; GO:0036459,thiol-dependent ubiquitinyl hydrolase activity; GO:0016579,protein deubiquitination; GO:0006511,ubiquitin-dependent protein catabolic process	PF00443.29:Ubiquitin carboxyl-terminal hydrolase
Cs1g04550	1.54	0.72	0.58	151.89	1.99	0.54	18	8	6	1688	22	6	5.81102	NA	1	false	chr1	4036221	4036833	+	Cs1g04550	--	--	--	hypothetical protein CISIN_1g033265mg [Citrus sinensis]	RecName: Full=Egg cell-secreted protein 1.4; Flags: Precursor;	SubName: Full=Uncharacterized protein {ECO:0000313|EMBL:GAY69512.1};	--	GO:0031410,cytoplasmic vesicle; GO:0005576,extracellular region; GO:0031982,vesicle; GO:0009567,double fertilization forming a zygote and endosperm; GO:0080155,regulation of double fertilization forming a zygote and endosperm; GO:2000008,regulation of protein localization to cell surface; GO:0007338,single fertilization	PF05617.11:Prolamin-like
Cs1g04560	6.42	7.78	6.34	7.41	5.42	7.18	157	181	138	172	125	167	-0.00815864	0.973837	0.986	false	chr1	4056570	4059422	+	Cs1g04560	--	K13124 mitogen-activated protein kinase organizer 1 | (RefSeq) WD repeat domain-containing protein 83 (A)	--	hypothetical protein CICLE_v10026172mg [Citrus clementina]	RecName: Full=COMPASS-like H3K4 histone methylase component WDR5A {ECO:0000303|PubMed:19567704}; Short=AtWDR5A {ECO:0000303|PubMed:19567704};	SubName: Full=Uncharacterized protein {ECO:0000313|EMBL:ESR41146.1};	Conserved WD40 repeat-containing protein	GO:0005634,nucleus; GO:0048188,Set1C/COMPASS complex; GO:0042393,histone binding; GO:0008168,methyltransferase activity; GO:0010228,vegetative to reproductive phase transition of meristem	PF00400.32:WD domain, G-beta repeat
Cs1g04570	98.95	110.7	120.23	82.74	121.21	123.65	9909	10555	10720	7866	11446	11788	0.014169	0.94571	0.970402	false	chr1	4067070	4075415	+	Cs1g04570	--	K10999 cellulose synthase A [EC:2.4.1.12] | (RefSeq) cellulose synthase A catalytic subunit 2 [UDP-forming] (A)	--	hypothetical protein CICLE_v10024766mg [Citrus clementina]	RecName: Full=Cellulose synthase A catalytic subunit 6 [UDP-forming]; Short=AtCesA6; EC=2.4.1.12; AltName: Full=AraxCelA; AltName: Full=Isoxaben-resistant protein 2; AltName: Full=Protein PROCUSTE 1; AltName: Full=Protein QUILL;	RecName: Full=Cellulose synthase {ECO:0000256|RuleBase:RU361116}; EC=2.4.1.12 {ECO:0000256|RuleBase:RU361116};	--	GO:0010330,cellulose synthase complex; GO:0005794,Golgi apparatus; GO:0005887,integral component of plasma membrane; GO:0016020,membrane; GO:0005886,plasma membrane; GO:0016760,cellulose synthase (UDP-forming) activity; GO:0016759,cellulose synthase activity; GO:0046872,metal ion binding; GO:0071555,cell wall organization; GO:0030244,cellulose biosynthetic process; GO:0043622,cortical microtubule…	PF03552.14:Cellulose synthase
Cs1g04580	2.62	4.12	2.52	4.73	4.36	6.02	42	63	36	72	66	92	0.735342	0.0408612	0.109785	false	chr1	4077421	4078260	+	Cs1g04580	--	--	--	hypothetical protein CICLE_v10027346mg [Citrus clementina]	--	SubName: Full=Uncharacterized protein {ECO:0000313|EMBL:GAY60253.1};	--	--	--
Cs1g04590	20.38	20.96	21.85	20.1	22.68	23.55	769	753	734	720	807	846	0.0956531	0.48134	0.648521	false	chr1	4112133	4116835	+	Cs1g04590	--	--	--	hypothetical protein CICLE_v10026316mg [Citrus clementina]	RecName: Full=Protein LIKE COV 2 {ECO:0000303|PubMed:12668628};	SubName: Full=Uncharacterized protein {ECO:0000313|EMBL:GAY60255.1};	--	GO:0005768,endosome; GO:0005794,Golgi apparatus; GO:0016021,integral component of membrane; GO:0005802,trans-Golgi network; GO:0010222,stem vascular tissue pattern formation	PF04367.13:Protein of unknown function (DUF502)
Cs1g04600	49.39	50.17	48.39	50.77	50.48	47.84	2396	2317	2090	2338	2309	2209	0.03695	0.727193	0.832915	false	chr1	4117894	4125663	+	Cs1g04600	--	K13091 RNA-binding protein 39 | (RefSeq) RNA-binding protein 39 (A)	--	hypothetical protein CICLE_v10025229mg [Citrus clementina]	RecName: Full=Splicing factor U2af large subunit A; AltName: Full=U2 auxiliary factor 65 kDa subunit A; AltName: Full=U2 small nuclear ribonucleoprotein auxiliary factor large subunit A; Short=U2 snRNP auxiliary factor large subunit A;	SubName: Full=Uncharacterized protein {ECO:0000313|EMBL:ESR41140.1};	Transcriptional coactivator CAPER (RRM superfamily)	GO:0000243,commitment complex; GO:0016607,nuclear speck; GO:0071004,U2-type prespliceosome; GO:0089701,U2AF; GO:0008187,poly-pyrimidine tract binding; GO:0030628,pre-mRNA 3'-splice site binding; GO:0006397,mRNA processing; GO:0008380,RNA splicing	PF00076.22:RNA recognition motif. (a.k.a. RRM, RBD, or RNP domain)
Cs1g04610	10.63	10.05	9.51	15.2	10.53	10.53	442	398	352	600	413	417	0.292835	0.212586	0.369665	false	chr1	4126279	4131343	+	Cs1g04610	--	--	--	hypothetical protein CICLE_v10026333mg [Citrus clementina]	--	SubName: Full=Uncharacterized protein {ECO:0000313|EMBL:ESR41139.1};	Uncharacterized conserved protein	GO:0003676,nucleic acid binding	PF01918.21:Alba
Cs1g04640	7.38	6.87	8.44	3.11	5.39	5.09	388	344	395	155	267	255	-0.717964	0.00805277	0.0303439	false	chr1	4157047	4162009	+	Cs1g04640	--	K10807 ribonucleoside-diphosphate reductase subunit M1 [EC:1.17.4.1] | (RefSeq) ribonucleoside-diphosphate reductase large subunit-like (A)	ko00230: Purine metabolism; ko00240: Pyrimidine metabolism; ko00480: Glutathione metabolism	PREDICTED: ribonucleoside-diphosphate reductase large subunit-like [Citrus sinensis]	RecName: Full=Ribonucleoside-diphosphate reductase large subunit {ECO:0000303|PubMed:10542051}; EC=1.17.4.1; AltName: Full=Protein DEFECTIVE IN POLLEN DNA DEGRADATION 2 {ECO:0000303|PubMed:22239102}; AltName: Full=Ribonucleoside-diphosphate reductase R1 subunit {ECO:0000303|PubMed:10542051}; Short=AtRNR1;	SubName: Full=Uncharacterized protein {ECO:0000313|EMBL:GAY60264.1};	Ribonucleotide reductase, alpha subunit	GO:0005737,cytoplasm; GO:0005524,ATP binding; GO:0004748,ribonucleoside-diphosphate reductase activity, thioredoxin disulfide as acceptor; GO:0009202,deoxyribonucleoside triphosphate biosynthetic process; GO:0009263,deoxyribonucleotide biosynthetic process; GO:0006260,DNA replication; GO:0046686,response to cadmium ion	PF02867.15:Ribonucleotide reductase, barrel domain
Cs1g04650	28.83	99.48	36.47	21.25	50.38	36.46	1109	3643	1249	776	1827	1335	-0.580903	0.256125	0.423772	false	chr1	4169824	4171837	+	Cs1g04650	--	K09286 EREBP-like factor | (RefSeq) ethylene-responsive transcription factor RAP2-12 (A)	--	PREDICTED: ethylene-responsive transcription factor ERF110-like isoform X1 [Citrus sinensis]	RecName: Full=Ethylene-responsive transcription factor ABR1; AltName: Full=Protein ABA REPRESSOR 1;	SubName: Full=Uncharacterized protein {ECO:0000313|EMBL:GAY60265.1};	--	GO:0005634,nucleus; GO:0003677,DNA binding; GO:0003700,DNA-binding transcription factor activity; GO:0009738,abscisic acid-activated signaling pathway; GO:0050832,defense response to fungus; GO:0009873,ethylene-activated signaling pathway; GO:0009788,negative regulation of abscisic acid-activated signaling pathway; GO:0009737,response to abscisic acid; GO:0009749,response to glucose; GO:0006970,r…	PF00847.20:AP2 domain
Cs1g04680	0.1	2.79	0.11	0.51	1.38	0.1	2	55	2	10	27	2	-0.557962	0.693809	0.809027	false	chr1	4221580	4223195	+	Cs1g04680	--	K09286 EREBP-like factor | (RefSeq) ethylene-responsive transcription factor RAP2-12 (A)	--	PREDICTED: ethylene-responsive transcription factor ABR1-like isoform X2 [Citrus sinensis]	RecName: Full=Ethylene-responsive transcription factor ERF110;	SubName: Full=Uncharacterized protein {ECO:0000313|EMBL:GAY69348.1};	--	GO:0005634,nucleus; GO:0003677,DNA binding; GO:0003700,DNA-binding transcription factor activity; GO:0009873,ethylene-activated signaling pathway; GO:0045893,positive regulation of transcription, DNA-templated; GO:0048510,regulation of timing of transition from vegetative to reproductive phase; GO:0006351,transcription, DNA-templated	PF00847.20:AP2 domain
Cs1g04690	70.54	68.01	74.85	57.52	63.05	64.44	3182	2921	3006	2463	2682	2767	-0.180777	0.130788	0.260971	false	chr1	4223719	4229842	-	Cs1g04690	--	K03035 26S proteasome regulatory subunit N5 | (RefSeq) 26S proteasome non-ATPase regulatory subunit 12 homolog A (A)	ko03050: Proteasome	hypothetical protein CICLE_v10025611mg [Citrus clementina]	RecName: Full=26S proteasome non-ATPase regulatory subunit 12 homolog A; AltName: Full=26S proteasome regulatory subunit RPN5a; Short=AtRPN5a; AltName: Full=26S proteasome regulatory subunit p55 homolog A; AltName: Full=Protein EMBRYO DEFECTIVE 2107; AltName: Full=Protein MARIPOSA;	SubName: Full=Uncharacterized protein {ECO:0000313|EMBL:ESR41130.1};	26S proteasome regulatory complex, subunit RPN5/PSMD12	GO:0005737,cytoplasm; GO:0031595,nuclear proteasome complex; GO:0008541,proteasome regulatory particle, lid subcomplex; GO:0043161,proteasome-mediated ubiquitin-dependent protein catabolic process	PF01399.27:PCI domain
Cs1g04700	4.09	7.25	5.64	0.97	3.06	1.5	115	194	141	26	81	40	-1.59882	0.000887035	0.00491603	down	chr1	4230906	4234507	-	Cs1g04700	--	K16675 palmitoyltransferase ZDHHC9/14/18 [EC:2.3.1.225] | (RefSeq) protein S-acyltransferase 8-like (A)	--	PREDICTED: protein S-acyltransferase 8-like [Citrus sinensis]	RecName: Full=Protein S-acyltransferase 8; EC=2.3.1.225; AltName: Full=Probable palmitoyltransferase At4g24630; AltName: Full=Zinc finger DHHC domain-containing protein At4g24630;	SubName: Full=Uncharacterized protein {ECO:0000313|EMBL:GAY67482.1};	DHHC-type Zn-finger proteins	GO:0016021,integral component of membrane; GO:0005886,plasma membrane; GO:0019706,protein-cysteine S-palmitoyltransferase activity	PF01529.20:DHHC palmitoyltransferase
Cs1g04705	2.06	1.89	1.84	6.27	4.92	6.56	63	55	50	182	142	191	1.64411	8.5108e-10	1.74886e-08	up	chr1	4238310	4240174	+	Cs1g04705	--	--	--	--	--	--	--	--	--
Cs1g04720	16.59	2.99	12.51	13.3	14.44	7.02	134	23	90	102	110	54	0.130353	0.838869	0.906024	false	chr1	4265723	4266145	+	Cs1g04720	--	--	--	hypothetical protein CUMW_273450 [Citrus unshiu]	RecName: Full=Egg cell-secreted protein 1.4; Flags: Precursor;	SubName: Full=Uncharacterized protein {ECO:0000313|EMBL:GAY32257.1};	--	GO:0031410,cytoplasmic vesicle; GO:0005576,extracellular region; GO:0031982,vesicle; GO:0009567,double fertilization forming a zygote and endosperm; GO:0080155,regulation of double fertilization forming a zygote and endosperm; GO:2000008,regulation of protein localization to cell surface; GO:0007338,single fertilization	PF05617.11:Prolamin-like
Cs1g04730	599.31	458.5	409.05	655.3	562.13	364.54	8664	6311	5265	8993	7663	5017	0.133153	0.646607	0.7765	false	chr1	4282764	4283520	+	Cs1g04730	--	--	--	PREDICTED: egg cell-secreted protein 1.4-like [Citrus sinensis]	RecName: Full=Egg cell-secreted protein 1.4; Flags: Precursor;	SubName: Full=Uncharacterized protein {ECO:0000313|EMBL:KDO53353.1};	--	GO:0031410,cytoplasmic vesicle; GO:0005576,extracellular region; GO:0031982,vesicle; GO:0009567,double fertilization forming a zygote and endosperm; GO:0080155,regulation of double fertilization forming a zygote and endosperm; GO:2000008,regulation of protein localization to cell surface; GO:0007338,single fertilization	PF05617.11:Prolamin-like
Cs1g04740	3.51	3.43	2.51	121.91	94.83	132.87	44	41	28	1452	1122	1587	5.234	9.88522e-85	5.67631e-82	up	chr1	4285572	4286916	-	Cs1g04740	--	--	--	hypothetical protein CICLE_v10027409mg [Citrus clementina]	RecName: Full=Citrate-binding protein; Flags: Precursor;	SubName: Full=Uncharacterized protein {ECO:0000313|EMBL:ESR41128.1};	--	GO:0005773,vacuole	PF08787.11:Alginate lyase
Cs1g04750	1.87	0.49	2.06	4.44	2.8	2.28	56	14	55	126	79	65	1.12906	0.058791	0.14501	false	chr1	4295724	4297557	-	Cs1g04750	--	--	--	hypothetical protein CICLE_v10026263mg [Citrus clementina]	RecName: Full=Probable plastid-lipid-associated protein 7, chloroplastic; AltName: Full=Fibrillin-5; Flags: Precursor;	SubName: Full=Uncharacterized protein {ECO:0000313|EMBL:GAY59606.1};	--	GO:0009507,chloroplast; GO:0009570,chloroplast stroma; GO:0010236,plastoquinone biosynthetic process	PF04755.12:PAP_fibrillin
Cs1g04760	23.3	22.93	24.37	50.55	40.34	44.56	335	314	312	690	547	610	0.967986	5.40479e-08	8.3576e-07	false	chr1	4299017	4301097	-	Cs1g04760	--	K22066 BolA-like protein 1 | (RefSeq) sufE-like protein 1, chloroplastic/mitochondrial (A)	--	hypothetical protein CICLE_v10026852mg [Citrus clementina]	RecName: Full=Protein BOLA2 {ECO:0000303|PubMed:24203231};	SubName: Full=Uncharacterized protein {ECO:0000313|EMBL:GAY59605.1};	BolA (bacterial stress-induced morphogen)-related protein	GO:0005737,cytoplasm; GO:0005829,cytosol; GO:0005634,nucleus; GO:0010039,response to iron ion; GO:0006979,response to oxidative stress	PF01722.18:BolA-like protein
Cs1g04780	3.05	21.65	5.39	9.08	12.78	13.61	127	859	200	359	502	540	0.273401	0.673017	0.794643	false	chr1	4307524	4310070	+	Cs1g04780	--	--	--	hypothetical protein CICLE_v10025533mg [Citrus clementina]	RecName: Full=Trihelix transcription factor GT-2; AltName: Full=Trihelix DNA-binding protein GT-2;	SubName: Full=Uncharacterized protein {ECO:0000313|EMBL:ESR41124.1};	Transcription factor GT-2 and related proteins, contains trihelix DNA-binding/SANT domain	GO:0005634,nucleus; GO:0003677,DNA binding; GO:0003700,DNA-binding transcription factor activity; GO:0006351,transcription, DNA-templated	PF13837.6:Myb/SANT-like DNA-binding domain
Cs1g04800	2.43	2.79	2.34	2.56	2.49	2.61	126	138	108	126	122	129	0.0460403	0.830534	0.900823	false	chr1	4322466	4328750	-	Cs1g04800	--	--	--	hypothetical protein CICLE_v10026217mg [Citrus clementina]	--	SubName: Full=Uncharacterized protein {ECO:0000313|EMBL:GAY59603.1};	Molecular chaperone (DnaJ superfamily)	--	PF00226.31:DnaJ domain
Cs1g04810	5.83	6.85	6.52	7.42	6.47	7.74	358	401	357	433	375	453	0.200758	0.250148	0.416315	false	chr1	4336425	4341777	-	Cs1g04810	--	K21867 potassium channel | (RefSeq) potassium channel SKOR-like (A)	--	hypothetical protein CICLE_v10024904mg [Citrus clementina]	RecName: Full=Potassium channel SKOR; AltName: Full=Stelar K(+) outward rectifying channel;	SubName: Full=Uncharacterized protein {ECO:0000313|EMBL:ESR41120.1};	K+-channel ERG and related proteins, contain PAS/PAC sensor domain	GO:0005887,integral component of plasma membrane; GO:0015271,outward rectifier potassium channel activity; GO:0055075,potassium ion homeostasis; GO:0006813,potassium ion transport; GO:0034765,regulation of ion transmembrane transport; GO:0042391,regulation of membrane potential	PF00520.31:Ion transport protein
Cs1g04820	32.46	19.74	40.7	82.54	70.54	84.96	938	543	1047	2264	1922	2337	1.38294	4.93991e-06	5.24488e-05	up	chr1	4361599	4364985	+	Cs1g04820	--	--	--	hypothetical protein CICLE_v10026385mg [Citrus clementina]	--	SubName: Full=Uncharacterized protein {ECO:0000313|EMBL:ESR41117.1};	--	--	--
Cs1g04840	9.27	7.44	5.95	4.54	5.16	4.87	280	214	160	130	147	140	-0.616366	0.0174473	0.0562143	false	chr1	4376804	4381133	-	Cs1g04840	--	--	--	PREDICTED: WAT1-related protein At5g64700 [Citrus sinensis]	RecName: Full=WAT1-related protein At5g64700;	SubName: Full=Uncharacterized protein {ECO:0000313|EMBL:GAY59597.1};	--	GO:0016021,integral component of membrane; GO:0005886,plasma membrane; GO:0022857,transmembrane transporter activity	PF00892.20:EamA-like transporter family
Cs1g04850	1.76	2.42	2.43	1.29	1.71	2.55	127	166	156	88	116	175	-0.226351	0.507546	0.671531	false	chr1	4393827	4399450	+	Cs1g04850	--	--	--	hypothetical protein CICLE_v10024792mg [Citrus clementina]	--	SubName: Full=Uncharacterized protein {ECO:0000313|EMBL:ESR41114.1};	--	GO:0005777,peroxisome; GO:0010468,regulation of gene expression	PF01936.18:NYN domain
Cs1g04860	29.12	42.66	31.01	52.63	51.4	56.39	1307	1823	1239	2242	2175	2409	0.67097	0.000711519	0.00408911	false	chr1	4402686	4405842	-	Cs1g04860	--	--	--	hypothetical protein CICLE_v10025964mg [Citrus clementina]	RecName: Full=Probable mediator of RNA polymerase II transcription subunit 26c;	SubName: Full=Uncharacterized protein {ECO:0000313|EMBL:ESR41113.1};	--	GO:0005829,cytosol; GO:0070449,elongin complex; GO:0003746,translation elongation factor activity; GO:0006355,regulation of transcription, DNA-templated; GO:0006368,transcription elongation from RNA polymerase II promoter	PF08711.11:TFIIS helical bundle-like domain
Cs1g04870	59	134.25	73.58	26.88	107.32	52.17	1921	4162	2133	831	3295	1617	-0.498065	0.331296	0.506287	false	chr1	4416444	4418917	+	Cs1g04870	--	K09838 zeaxanthin epoxidase [EC:1.14.15.21] | (RefSeq) CitZEP, ZEP; zeaxanthin epoxidase, chloroplastic (A)	ko00906: Carotenoid biosynthesis	hypothetical protein CICLE_v10025686mg [Citrus clementina]	RecName: Full=Monooxygenase 3 {ECO:0000303|PubMed:10216258}; Short=AtMO3 {ECO:0000303|PubMed:10216258}; EC=1.14.13.-;	SubName: Full=Uncharacterized protein {ECO:0000313|EMBL:ESR41110.1};	Kynurenine 3-monooxygenase and related flavoprotein monooxygenases	GO:0071949,FAD binding; GO:0004497,monooxygenase activity; GO:0044550,secondary metabolite biosynthetic process	PF01494.19:FAD binding domain
Cs1g04890	0	1.87	0.56	0.21	4.31	2.6	0	18	5	2	41	25	1.57822	0.265516	0.434511	false	chr1	4460462	4461544	+	Cs1g04890	--	--	--	hypothetical protein CICLE_v10027391mg [Citrus clementina]	RecName: Full=Monooxygenase 3 {ECO:0000303|PubMed:10216258}; Short=AtMO3 {ECO:0000303|PubMed:10216258}; EC=1.14.13.-;	SubName: Full=Uncharacterized protein {ECO:0000313|EMBL:ESR41107.1};	Kynurenine 3-monooxygenase and related flavoprotein monooxygenases	GO:0071949,FAD binding; GO:0004497,monooxygenase activity; GO:0044550,secondary metabolite biosynthetic process	PF13450.6:NAD(P)-binding Rossmann-like domain
Cs1g04900	32.87	84.53	37.61	45.46	61.53	49	1017	2490	1036	1335	1795	1443	0.0388054	0.919512	0.955831	false	chr1	4473445	4475908	+	Cs1g04900	--	K09838 zeaxanthin epoxidase [EC:1.14.15.21] | (RefSeq) zeaxanthin epoxidase, chloroplastic-like (A)	ko00906: Carotenoid biosynthesis	hypothetical protein CICLE_v10025675mg [Citrus clementina]	RecName: Full=Monooxygenase 2 {ECO:0000303|PubMed:10216258}; Short=AtMO2 {ECO:0000303|PubMed:10216258}; EC=1.14.13.-;	SubName: Full=Uncharacterized protein {ECO:0000313|EMBL:ESR41105.1};	Kynurenine 3-monooxygenase and related flavoprotein monooxygenases	GO:0071949,FAD binding; GO:0004497,monooxygenase activity; GO:0002239,response to oomycetes; GO:0044550,secondary metabolite biosynthetic process	PF01494.19:FAD binding domain
Cs1g04920	0.39	0.25	1.58	6.73	5.29	7.69	5	3	18	82	64	94	3.2004	2.6528e-06	3.0065e-05	up	chr1	4486137	4486903	+	Cs1g04920	--	--	--	PREDICTED: citrate-binding protein-like [Citrus sinensis]	RecName: Full=Citrate-binding protein; Flags: Precursor;	SubName: Full=Uncharacterized protein {ECO:0000313|EMBL:ESR41103.1}; Flags: Fragment;	--	GO:0005773,vacuole	PF08787.11:Alginate lyase
Cs1g04970	88.1	77.32	95.09	92.68	90.16	90.55	1484	1240	1426	1482	1432	1452	0.0952969	0.522048	0.683759	false	chr1	4518842	4520148	-	Cs1g04970	--	K09481 protein transport protein SEC61 subunit beta | (RefSeq) protein transport protein Sec61 subunit beta (A)	ko03060: Protein export; ko04141: Protein processing in endoplasmic reticulum; ko04145: Phagosome	hypothetical protein CICLE_v10027536mg [Citrus clementina]	RecName: Full=Protein transport protein Sec61 subunit beta;	RecName: Full=Protein transport protein Sec61 subunit beta {ECO:0000256|PIRNR:PIRNR006398};	Sec61 protein translocation complex, beta subunit	GO:0005789,endoplasmic reticulum membrane; GO:0031205,endoplasmic reticulum Sec complex; GO:0016021,integral component of membrane; GO:0005784,Sec61 translocon complex; GO:0005086,ARF guanyl-nucleotide exchange factor activity; GO:0031204,posttranslational protein targeting to membrane, translocation; GO:0006616,SRP-dependent cotranslational protein targeting to membrane, translocation	PF03911.16:Sec61beta family
Cs1g04980	16.2	20.21	18.28	14.89	15.69	18.92	448	532	450	391	409	498	-0.11612	0.535653	0.694625	false	chr1	4527235	4530180	+	Cs1g04980	--	K02876 large subunit ribosomal protein L15 | (RefSeq) 50S ribosomal protein L15 (A)	ko03010: Ribosome	hypothetical protein CICLE_v10026233mg [Citrus clementina]	--	SubName: Full=Uncharacterized protein {ECO:0000313|EMBL:ESR41098.1};	Mitochondrial/chloroplast ribosomal protein L15/L10	GO:0015934,large ribosomal subunit; GO:0003735,structural constituent of ribosome; GO:0006412,translation	PF00828.19:Ribosomal proteins 50S-L15, 50S-L18e, 60S-L27A
Cs1g04990	15.26	17.92	18.16	13.35	18.57	17.07	602	673	638	500	691	641	-0.0426805	0.821762	0.89502	false	chr1	4531115	4534891	+	Cs1g04990	--	K01956 carbamoyl-phosphate synthase small subunit [EC:6.3.5.5] | (RefSeq) carbamoyl-phosphate synthase small chain, chloroplastic (A)	ko00240: Pyrimidine metabolism; ko00250: Alanine, aspartate and glutamate metabolism	hypothetical protein CICLE_v10025660mg [Citrus clementina]	RecName: Full=Carbamoyl-phosphate synthase small chain, chloroplastic; EC=6.3.5.5; AltName: Full=Carbamoyl-phosphate synthetase glutamine chain; AltName: Full=Protein VENOSA 6; Flags: Precursor;	SubName: Full=Uncharacterized protein {ECO:0000313|EMBL:ESR41097.1};	Multifunctional pyrimidine synthesis protein CAD (includes carbamoyl-phophate synthetase, aspartate transcarbamylase, and glutamine amidotransferase)	GO:0005951,carbamoyl-phosphate synthase complex; GO:0009507,chloroplast; GO:0009570,chloroplast stroma; GO:0005524,ATP binding; GO:0004088,carbamoyl-phosphate synthase (glutamine-hydrolyzing) activity; GO:0006207,'de novo' pyrimidine nucleobase biosynthetic process; GO:0044205,'de novo' UMP biosynthetic process; GO:0006526,arginine biosynthetic process; GO:0016036,cellular response to phosphate s…	PF00988.22:Carbamoyl-phosphate synthase small chain, CPSase domain
Cs1g05000	142.82	136.69	195.68	135.23	135.56	143.06	7585	6912	9253	6818	6789	7233	-0.172934	0.373397	0.547904	false	chr1	4538792	4541894	-	Cs1g05000	--	K10355 actin, other eukaryote | (RefSeq) actin-7 (A)	--	hypothetical protein CICLE_v10025866mg [Citrus clementina]	RecName: Full=Actin-7; AltName: Full=Actin-2;	SubName: Full=Uncharacterized protein {ECO:0000313|EMBL:GAY59584.1};	Actin and related proteins	GO:0005618,cell wall; GO:0009941,chloroplast envelope; GO:0009570,chloroplast stroma; GO:0005856,cytoskeleton; GO:0005829,cytosol; GO:0005739,mitochondrion; GO:0005730,nucleolus; GO:0005886,plasma membrane; GO:0009506,plasmodesma; GO:0005524,ATP binding; GO:0005200,structural constituent of cytoskeleton; GO:0051301,cell division; GO:0009733,response to auxin; GO:0009416,response to light stimulus…	PF00022.19:Actin
Cs1g05020	3.2	4.6	2.27	2.56	4.5	7.74	46	63	29	35	61	106	0.581742	0.274744	0.445976	false	chr1	4575652	4576404	+	Cs1g05020	--	K19040 E3 ubiquitin-protein ligase ATL10/75/76/77/78 [EC:2.3.2.27] | (RefSeq) RING-H2 finger protein ATL78-like (A)	--	hypothetical protein CICLE_v10026487mg [Citrus clementina]	RecName: Full=RING-H2 finger protein ATL78; EC=2.3.2.27 {ECO:0000305}; AltName: Full=RING-type E3 ubiquitin transferase ATL78 {ECO:0000305};	SubName: Full=Uncharacterized protein {ECO:0000313|EMBL:ESR41093.1};	FOG: Predicted E3 ubiquitin ligase	GO:0016021,integral component of membrane; GO:0046872,metal ion binding; GO:0061630,ubiquitin protein ligase activity; GO:0043161,proteasome-mediated ubiquitin-dependent protein catabolic process	PF13639.6:Ring finger domain
Cs1g05030	1.46	13.48	2.77	0.73	0.72	1.26	90	792	152	43	42	74	-2.66379	0.000409831	0.00255783	down	chr1	4580382	4583612	-	Cs1g05030	--	K13430 serine/threonine-protein kinase PBS1 [EC:2.7.11.1] | (RefSeq) serine/threonine-protein kinase PBS1 (A)	ko04626: Plant-pathogen interaction	hypothetical protein CICLE_v10024830mg [Citrus clementina]	RecName: Full=Putative receptor-like protein kinase At5g39000; EC=2.7.11.-; Flags: Precursor;	SubName: Full=Uncharacterized protein {ECO:0000313|EMBL:ESR41092.1};	Serine/threonine protein kinase	GO:0016021,integral component of membrane; GO:0005524,ATP binding; GO:0004674,protein serine/threonine kinase activity	PF07714.17:Protein tyrosine kinase
Cs1g05040	1.28	11.22	0.85	8.48	14.92	24.26	17	142	10	107	187	307	1.87425	0.0363923	0.100548	false	chr1	4594078	4594773	-	Cs1g05040	--	K19040 E3 ubiquitin-protein ligase ATL10/75/76/77/78 [EC:2.3.2.27] | (RefSeq) RING-H2 finger protein ATL78-like (A)	--	hypothetical protein CICLE_v10026409mg [Citrus clementina]	RecName: Full=RING-H2 finger protein ATL78; EC=2.3.2.27 {ECO:0000305}; AltName: Full=RING-type E3 ubiquitin transferase ATL78 {ECO:0000305};	SubName: Full=Uncharacterized protein {ECO:0000313|EMBL:ESR41091.1};	FOG: Predicted E3 ubiquitin ligase	GO:0016021,integral component of membrane; GO:0046872,metal ion binding; GO:0061630,ubiquitin protein ligase activity; GO:0043161,proteasome-mediated ubiquitin-dependent protein catabolic process	PF13639.6:Ring finger domain
Cs1g05060	0.51	4.25	0.78	1.13	4.83	10.1	8	64	11	17	72	152	1.57086	0.105424	0.223292	false	chr1	4625149	4625976	-	Cs1g05060	--	K19040 E3 ubiquitin-protein ligase ATL10/75/76/77/78 [EC:2.3.2.27] | (RefSeq) E3 ubiquitin-protein ligase ATL76-like (A)	--	PREDICTED: E3 ubiquitin-protein ligase ATL76-like [Citrus sinensis]	RecName: Full=RING-H2 finger protein ATL78; EC=2.3.2.27 {ECO:0000305}; AltName: Full=RING-type E3 ubiquitin transferase ATL78 {ECO:0000305};	SubName: Full=Uncharacterized protein {ECO:0000313|EMBL:GAY68005.1};	FOG: Predicted E3 ubiquitin ligase	GO:0016021,integral component of membrane; GO:0046872,metal ion binding; GO:0061630,ubiquitin protein ligase activity; GO:0043161,proteasome-mediated ubiquitin-dependent protein catabolic process	PF13639.6:Ring finger domain
Cs1g05100	12.82	15.16	12.54	9.95	9.15	8.5	789	888	687	581	531	498	-0.526531	0.00141596	0.00722733	false	chr1	4686379	4695818	+	Cs1g05100	--	K08331 autophagy-related protein 13 | (RefSeq) autophagy-related protein 13b (A)	ko04136: Autophagy - other	hypothetical protein CICLE_v10025105mg [Citrus clementina]	RecName: Full=Autophagy-related protein 13b {ECO:0000303|PubMed:12114572}; Short=AtAPG13b {ECO:0000303|PubMed:12114572};	SubName: Full=Uncharacterized protein {ECO:0000313|EMBL:KDO39743.1};	Phosphoprotein involved in cytoplasm to vacuole targeting and autophagy	GO:1990316,Atg1/ULK1 kinase complex; GO:0005776,autophagosome; GO:0031410,cytoplasmic vesicle; GO:0006914,autophagy; GO:0015031,protein transport	PF10033.9:Autophagy-related protein 13
Cs1g05110	6.58	6.65	5.58	2.96	4.08	2.61	82	79	62	35	48	31	-0.941285	0.00481993	0.0199076	false	chr1	4704837	4706977	+	Cs1g05110	--	K17279 receptor expression-enhancing protein 5/6 | (RefSeq) HVA22-like protein k (A)	--	hypothetical protein CICLE_v10026788mg [Citrus clementina]	RecName: Full=HVA22-like protein k; Short=AtHVA22k;	SubName: Full=Uncharacterized protein {ECO:0000313|EMBL:ESR41082.1};	Protein involved in membrane traffic (YOP1/TB2/DP1/HVA22 family)	--	--
Cs1g05120	0.07	0.29	0.25	4.35	3.83	4.79	6	24	20	364	318	402	4.45419	2.38962e-24	1.66886e-22	up	chr1	4749781	4754766	+	Cs1g05120	--	K13420 LRR receptor-like serine/threonine-protein kinase FLS2 [EC:2.7.11.1] | (RefSeq) probable LRR receptor-like serine/threonine-protein kinase At3g47570 (A)	ko04016: MAPK signaling pathway - plant; ko04626: Plant-pathogen interaction	PREDICTED: putative receptor-like protein kinase At3g47110 isoform X1 [Citrus sinensis]	RecName: Full=Probable LRR receptor-like serine/threonine-protein kinase At3g47570; EC=2.7.11.1; Flags: Precursor;	SubName: Full=Uncharacterized protein {ECO:0000313|EMBL:KDO42815.1};	--	GO:0016021,integral component of membrane; GO:0005886,plasma membrane; GO:0005524,ATP binding; GO:0004674,protein serine/threonine kinase activity	PF00069.25:Protein kinase domain
Cs1g05150	11.49	10.85	10.46	11.19	15.58	14.21	79	71	64	73	101	93	0.343743	0.207533	0.363508	false	chr1	4788838	4789406	-	Cs1g05150	--	K08269 serine/threonine-protein kinase ULK2 [EC:2.7.11.1] | (RefSeq) serine/threonine-protein kinase ATG1c (A)	ko04136: Autophagy - other	PREDICTED: serine/threonine-protein kinase ATG1t-like isoform X6 [Citrus sinensis]	RecName: Full=Serine/threonine-protein kinase ATG1a {ECO:0000305}; EC=2.7.11.-; AltName: Full=Autophagy-related protein 1a {ECO:0000303|PubMed:12114572}; Short=AtAPG1a {ECO:0000303|PubMed:12114572};	SubName: Full=Uncharacterized protein {ECO:0000313|EMBL:KDO43295.1}; Flags: Fragment;	Serine/threonine-protein kinase involved in autophagy	GO:0005776,autophagosome; GO:0031410,cytoplasmic vesicle; GO:0005524,ATP binding; GO:0004674,protein serine/threonine kinase activity; GO:0006914,autophagy; GO:0015031,protein transport	--
Cs1g05170	8.62	6.95	7.24	9.12	8.96	7.84	254	195	190	255	249	220	0.207791	0.311779	0.486002	false	chr1	4818965	4822541	+	Cs1g05170	--	K08269 serine/threonine-protein kinase ULK2 [EC:2.7.11.1] | (RefSeq) serine/threonine-protein kinase ATG1c (A)	ko04136: Autophagy - other	PREDICTED: serine/threonine-protein kinase ATG1t-like isoform X1 [Citrus sinensis]	RecName: Full=Serine/threonine-protein kinase ATG1t {ECO:0000305}; EC=2.7.11.-; AltName: Full=Autophagy-related protein 1t {ECO:0000305};	SubName: Full=Uncharacterized protein {ECO:0000313|EMBL:ESR41076.1};	Serine/threonine-protein kinase involved in autophagy	GO:0005776,autophagosome; GO:0031410,cytoplasmic vesicle; GO:0005524,ATP binding; GO:0003676,nucleic acid binding; GO:0004674,protein serine/threonine kinase activity; GO:0006914,autophagy; GO:0015031,protein transport	PF00069.25:Protein kinase domain
Cs1g05200	0.06	0.06	0.13	0.9	0.67	0.9	3	3	6	46	34	46	3.4103	5.46869e-08	8.43648e-07	up	chr1	4888459	4891978	+	Cs1g05200	--	K13430 serine/threonine-protein kinase PBS1 [EC:2.7.11.1] | (RefSeq) serine/threonine-protein kinase CDL1 (A)	ko04626: Plant-pathogen interaction	PREDICTED: G-type lectin S-receptor-like serine/threonine-protein kinase At1g11330 isoform X1 [Citrus sinensis]	RecName: Full=G-type lectin S-receptor-like serine/threonine-protein kinase At1g11330; EC=2.7.11.1; Flags: Precursor;	SubName: Full=Uncharacterized protein {ECO:0000313|EMBL:GAY63779.1};	--	GO:0016021,integral component of membrane; GO:0005886,plasma membrane; GO:0005524,ATP binding; GO:0005516,calmodulin binding; GO:0030246,carbohydrate binding; GO:0004674,protein serine/threonine kinase activity; GO:0006468,protein phosphorylation; GO:0048544,recognition of pollen	PF07714.17:Protein tyrosine kinase
Cs1g05210	9.87	14.49	10.11	14.02	15.62	15.76	181	253	165	244	270	275	0.424404	0.0682379	0.16214	false	chr1	4893799	4895810	+	Cs1g05210	--	K09131 uncharacterized protein | (RefSeq) UPF0235 protein C15orf40 homolog (A)	--	hypothetical protein CICLE_v10026766mg [Citrus clementina]	RecName: Full=UPF0235 protein At5g63440;	SubName: Full=Uncharacterized protein {ECO:0000313|EMBL:GAY63782.1};	Uncharacterized conserved protein, contains YggU domain	GO:0016607,nuclear speck; GO:0005634,nucleus; GO:0005681,spliceosomal complex; GO:0006397,mRNA processing; GO:0008380,RNA splicing	PF02594.16:Uncharacterised ACR, YggU family COG1872
Cs1g05220	0.43	1.05	2.69	0.11	1.06	0.34	12	28	67	3	28	9	-1.4462	0.13512	0.267139	false	chr1	4911715	4913383	-	Cs1g05220	--	K13691 pathogen-inducible salicylic acid glucosyltransferase [EC:2.4.1.-] | (RefSeq) UDP-glycosyltransferase 74E2-like (A)	--	hypothetical protein CICLE_v10027296mg [Citrus clementina]	RecName: Full=UDP-glucose iridoid glucosyltransferase; EC=2.4.1.-; AltName: Full=UDP-glucose glucosyltransferase 7; Short=CrUGT7; AltName: Full=UDP-glycosyltransferase 76A2;	SubName: Full=Uncharacterized protein {ECO:0000313|EMBL:ESR41069.1};	UDP-glucuronosyl and UDP-glucosyl transferase	GO:0035251,UDP-glucosyltransferase activity; GO:1900994,(-)-secologanin biosynthetic process	PF00201.18:UDP-glucoronosyl and UDP-glucosyl transferase
Cs1g05280	0.75	0.79	0.53	0.74	0.28	0.3	29	29	18	27	10	11	-0.623651	0.313377	0.487738	false	chr1	4981462	4984557	+	Cs1g05280	--	K08867 WNK lysine deficient protein kinase [EC:2.7.11.1] | (RefSeq) probable serine/threonine-protein kinase WNK7 (A)	--	hypothetical protein CICLE_v10025073mg [Citrus clementina]	RecName: Full=Probable serine/threonine-protein kinase WNK6; Short=AtWNK6; EC=2.7.11.1; AltName: Full=Protein kinase with no lysine 6;	SubName: Full=Uncharacterized protein {ECO:0000313|EMBL:ESR41062.1};	Serine/threonine protein kinase	GO:0005829,cytosol; GO:0005524,ATP binding; GO:0004672,protein kinase activity; GO:0004674,protein serine/threonine kinase activity; GO:0035556,intracellular signal transduction; GO:0006468,protein phosphorylation	PF00069.25:Protein kinase domain
Cs1g05290	0.49	1.26	0.71	0.78	0.73	0.7	28	68	36	42	39	38	-0.123156	0.791351	0.875036	false	chr1	4987546	4991217	+	Cs1g05290	--	K08867 WNK lysine deficient protein kinase [EC:2.7.11.1] | (RefSeq) probable serine/threonine-protein kinase WNK7 (A)	--	hypothetical protein CICLE_v10025073mg [Citrus clementina]	RecName: Full=Probable serine/threonine-protein kinase WNK6; Short=AtWNK6; EC=2.7.11.1; AltName: Full=Protein kinase with no lysine 6;	SubName: Full=Uncharacterized protein {ECO:0000313|EMBL:ESR41062.1};	Serine/threonine protein kinase	GO:0005829,cytosol; GO:0005524,ATP binding; GO:0004672,protein kinase activity; GO:0004674,protein serine/threonine kinase activity; GO:0035556,intracellular signal transduction; GO:0006468,protein phosphorylation	PF00069.25:Protein kinase domain
Cs1g05390	1.5	1.8	2.02	0.32	0.99	0.97	146	167	175	30	91	90	-1.19688	0.00806663	0.0303796	down	chr1	5089304	5101270	+	Cs1g05390	--	--	--	PREDICTED: protein TONSOKU isoform X1 [Citrus sinensis]	RecName: Full=Protein TONSOKU; AltName: Full=Protein BRUSHY 1; AltName: Full=Protein MGOUN 3;	SubName: Full=Uncharacterized protein {ECO:0000313|EMBL:GAY58445.1};	FOG: TPR repeat	GO:0016020,membrane; GO:0005654,nucleoplasm; GO:0005634,nucleus; GO:0051301,cell division; GO:0016569,covalent chromatin modification; GO:0000086,G2/M transition of mitotic cell cycle; GO:0009933,meristem structural organization; GO:0009934,regulation of meristem structural organization	PF13424.6:Tetratricopeptide repeat
Cs1g05410	2.36	1.57	2	1.14	1.58	1.69	98	62	74	45	62	67	-0.403229	0.234895	0.397752	false	chr1	5152598	5157201	+	Cs1g05410	--	K20241 WD repeat-containing protein 44 | (RefSeq) WD repeat-containing protein 44-like isoform X1 (A)	--	hypothetical protein CICLE_v10025084mg [Citrus clementina]	RecName: Full=COMPASS-like H3K4 histone methylase component WDR5A {ECO:0000303|PubMed:19567704}; Short=AtWDR5A {ECO:0000303|PubMed:19567704};	SubName: Full=Uncharacterized protein {ECO:0000313|EMBL:ESR41052.1};	WD40 repeat-containing protein	GO:0005634,nucleus; GO:0048188,Set1C/COMPASS complex; GO:0042393,histone binding; GO:0008168,methyltransferase activity; GO:0010228,vegetative to reproductive phase transition of meristem	PF00400.32:WD domain, G-beta repeat
Cs1g05420	6.28	8.3	7.55	6.58	6.42	6.34	303	381	324	301	292	291	-0.166128	0.360694	0.535305	false	chr1	5161890	5165133	+	Cs1g05420	--	--	--	hypothetical protein CICLE_v10025832mg [Citrus clementina]	--	SubName: Full=Uncharacterized protein {ECO:0000313|EMBL:ESR41049.1};	--	--	PF00628.29:PHD-finger
Cs1g05430	6.64	9.52	6.2	6.41	6.89	7.79	463	632	385	424	453	517	-0.0570582	0.807706	0.886041	false	chr1	5165634	5170728	+	Cs1g05430	--	K09903 uridylate kinase [EC:2.7.4.22] | (RefSeq) hypothetical protein (A)	ko00240: Pyrimidine metabolism	PREDICTED: uridylate kinase [Citrus sinensis]	RecName: Full=Bifunctional aspartokinase/homoserine dehydrogenase 2, chloroplastic; Short=AK-HD 2; Short=AK-HSDH 2; AltName: Full=Beta-aspartyl phosphate homoserine 2; Includes: RecName: Full=Aspartokinase; EC=2.7.2.4; Includes: RecName: Full=Homoserine dehydrogenase; EC=1.1.1.3; Flags: Precursor;	SubName: Full=Uncharacterized protein {ECO:0000313|EMBL:KDO58362.1};	--	GO:0009507,chloroplast; GO:0009570,chloroplast stroma; GO:0004072,aspartate kinase activity; GO:0005524,ATP binding; GO:0004412,homoserine dehydrogenase activity; GO:0050661,NADP binding; GO:0009090,homoserine biosynthetic process; GO:0009089,lysine biosynthetic process via diaminopimelate; GO:0009086,methionine biosynthetic process; GO:0009088,threonine biosynthetic process	PF00696.28:Amino acid kinase family
Cs1g05470	2.23	3.43	2.62	1.53	2.41	1.59	103	151	108	67	105	70	-0.558941	0.083598	0.187637	false	chr1	5191088	5196097	+	Cs1g05470	--	K11446 histone demethylase JARID1 [EC:1.14.11.-] | (RefSeq) lysine-specific demethylase 5B (A)	--	hypothetical protein CICLE_v10025879mg [Citrus clementina]	RecName: Full=Probable Histone-lysine N-methyltransferase ATXR5; EC=2.1.1.43; Flags: Precursor;	SubName: Full=Uncharacterized protein {ECO:0000313|EMBL:ESR41041.1};	Putative transcription factor ASH1/LIN-59	GO:0009507,chloroplast; GO:0005634,nucleus; GO:0018024,histone-lysine N-methyltransferase activity; GO:0046872,metal ion binding	PF00628.29:PHD-finger
Cs1g05490	30.1	24.75	25.87	30.03	21.97	22.52	622	487	476	589	428	443	-0.0887876	0.691501	0.807155	false	chr1	5222789	5225920	+	Cs1g05490	--	K02879 large subunit ribosomal protein L17 | (RefSeq) 50S ribosomal protein L17 (A)	ko03010: Ribosome	hypothetical protein CICLE_v10026667mg [Citrus clementina]	RecName: Full=50S ribosomal protein L17, chloroplastic {ECO:0000303|PubMed:10874046}; AltName: Full=CL17; AltName: Full=Chloroplastic large ribosomal subunit protein bL17c {ECO:0000303|PubMed:28007896}; Flags: Precursor;	SubName: Full=Uncharacterized protein {ECO:0000313|EMBL:ESR41039.1};	Mitochondrial/chloroplast ribosomal protein L17	GO:0009507,chloroplast; GO:0005840,ribosome; GO:0019843,rRNA binding; GO:0003735,structural constituent of ribosome; GO:0006412,translation	PF01196.19:Ribosomal protein L17
Cs1g05500	1.15	2.22	1.34	0.36	1.37	0.46	50	92	52	15	56	19	-1.0894	0.075998	0.175012	false	chr1	5229069	5232119	+	Cs1g05500	--	K20890 xylan alpha-glucuronosyltransferase [EC:2.4.1.-] | (RefSeq) UDP-glucuronate:xylan alpha-glucuronosyltransferase 1 (A)	--	PREDICTED: UDP-glucuronate:xylan alpha-glucuronosyltransferase 1 [Citrus sinensis]	RecName: Full=UDP-glucuronate:xylan alpha-glucuronosyltransferase 1; Short=UDP-GlcA:xylan glucuronyltransferase 1; EC=2.4.1.-; AltName: Full=Glycogenin-like protein 1; AltName: Full=Plant glycogenin-like starch initiation protein 1; AltName: Full=Protein GLUCURONIC ACID SUBSTITUTION OF XYLAN 1; Short=AtGUX1;	SubName: Full=Uncharacterized protein {ECO:0000313|EMBL:GAY58466.1};	Glycosyl transferase, family 8 - glycogenin	GO:0005794,Golgi apparatus; GO:0000139,Golgi membrane; GO:0016021,integral component of membrane; GO:0015020,glucuronosyltransferase activity; GO:0080116,glucuronoxylan glucuronosyltransferase activity; GO:0046872,metal ion binding; GO:0071555,cell wall organization; GO:0010417,glucuronoxylan biosynthetic process; GO:0009834,plant-type secondary cell wall biogenesis; GO:0045492,xylan biosynthetic…	PF01501.20:Glycosyl transferase family 8
Cs1g05510	5.67	4.14	7.01	2.21	3.43	3.57	279	194	307	103	159	167	-0.848752	0.00804461	0.0303187	false	chr1	5233589	5236475	-	Cs1g05510	--	K01051 pectinesterase [EC:3.1.1.11] | (RefSeq) PECS-2.1; pectinesterase (A)	ko00040: Pentose and glucuronate interconversions	hypothetical protein CICLE_v10025271mg [Citrus clementina]	RecName: Full=Probable pectinesterase/pectinesterase inhibitor 51; Includes: RecName: Full=Pectinesterase inhibitor 51; AltName: Full=Pectin methylesterase inhibitor 51; Includes: RecName: Full=Pectinesterase 51; Short=PE 51; EC=3.1.1.11; AltName: Full=Pectin methylesterase 51; Short=AtPME51; Flags: Precursor;	SubName: Full=Uncharacterized protein {ECO:0000313|EMBL:ESR41037.1};	--	GO:0071944,cell periphery; GO:0005618,cell wall; GO:0005576,extracellular region; GO:0045330,aspartyl esterase activity; GO:0030599,pectinesterase activity; GO:0046910,pectinesterase inhibitor activity; GO:0042545,cell wall modification; GO:0045490,pectin catabolic process	PF01095.19:Pectinesterase
Cs1g05530	15.93	23.66	15.52	19.38	17.94	18.77	1429	2021	1240	1651	1518	1603	0.0549582	0.801821	0.88176	false	chr1	5264225	5271494	+	Cs1g05530	--	--	--	PREDICTED: zinc finger CCCH domain-containing protein 38 isoform X1 [Citrus sinensis]	RecName: Full=Zinc finger CCCH domain-containing protein 38; Short=AtC3H38;	SubName: Full=Uncharacterized protein {ECO:0000313|EMBL:GAY58470.1}; Flags: Fragment;	--	GO:0003677,DNA binding; GO:0046872,metal ion binding	PF18044.1:CCCH-type zinc finger
Cs1g05550	5.21	5.28	5.31	11.04	9.73	10.21	315	304	286	634	555	588	0.998974	8.53837e-11	1.95682e-09	false	chr1	5286232	5290943	+	Cs1g05550	--	K23877 xyloglucan O-acetyltransferase | (RefSeq) protein ALTERED XYLOGLUCAN 4 (A)	--	PREDICTED: protein trichome berefringence-like 7 [Citrus sinensis]	RecName: Full=Protein trichome berefringence-like 7;	SubName: Full=Uncharacterized protein {ECO:0000313|EMBL:ESR45496.1};	--	GO:0005794,Golgi apparatus; GO:0016021,integral component of membrane; GO:0016413,O-acetyltransferase activity; GO:0071554,cell wall organization or biogenesis	PF13839.6:GDSL/SGNH-like Acyl-Esterase family found in Pmr5 and Cas1p
Cs1g05570	4.04	5.43	5.48	2.46	4.47	4.52	140	179	169	81	146	149	-0.359675	0.267909	0.437354	false	chr1	5293194	5298767	-	Cs1g05570	--	K10751 chromatin assembly factor 1 subunit B | (RefSeq) chromatin assembly factor 1 subunit FAS2 (A)	--	hypothetical protein CICLE_v10000834mg [Citrus clementina]	RecName: Full=Chromatin assembly factor 1 subunit FAS2; Short=CAF-1 subunit FAS2; AltName: Full=CAF-1 p60 homolog; AltName: Full=Protein FASCIATA 2;	SubName: Full=Uncharacterized protein {ECO:0000313|EMBL:ESR45493.1};	Chromatin assembly complex 1 subunit B/CAC2 (contains WD40 repeats)	GO:0033186,CAF-1 complex; GO:0005634,nucleus; GO:0042393,histone binding; GO:0008283,cell proliferation; GO:0016569,covalent chromatin modification; GO:0006310,DNA recombination; GO:0000724,double-strand break repair via homologous recombination; GO:0031507,heterochromatin assembly; GO:0048366,leaf development; GO:0009933,meristem structural organization; GO:0006334,nucleosome assembly; GO:000955…	PF00400.32:WD domain, G-beta repeat
Cs1g05590	2.53	3.91	2.09	1.09	1.19	1.74	61	90	45	25	27	40	-1.05928	0.0138195	0.0467777	down	chr1	5326015	5328145	-	Cs1g05590	--	--	--	hypothetical protein CUMW_046080 [Citrus unshiu]	--	SubName: Full=Uncharacterized protein {ECO:0000313|EMBL:GAY39655.1};	--	--	PF02536.14:mTERF
Cs1g05600	1.01	0.79	2.04	0.64	0.77	0.97	35	26	63	21	25	32	-0.665612	0.211295	0.368132	false	chr1	5332230	5334043	+	Cs1g05600	--	--	--	hypothetical protein CICLE_v10002604mg [Citrus clementina]	RecName: Full=Cell wall / vacuolar inhibitor of fructosidase 2; Short=AtC/VIF2; Flags: Precursor;	SubName: Full=Uncharacterized protein {ECO:0000313|EMBL:GAY58477.1};	--	GO:0005773,vacuole; GO:0004857,enzyme inhibitor activity; GO:0043086,negative regulation of catalytic activity; GO:0080167,response to karrikin	PF04043.15:Plant invertase/pectin methylesterase inhibitor
Cs1g05620	51.22	39.42	38.33	87.6	55.85	55	2059	1509	1372	3343	2117	2105	0.649146	0.0184757	0.0588203	false	chr1	5336710	5339379	-	Cs1g05620	--	K11717 cysteine desulfurase / selenocysteine lyase [EC:2.8.1.7 4.4.1.16] | (RefSeq) cysteine desulfurase 1, chloroplastic (A)	ko00450: Selenocompound metabolism	PREDICTED: probable cysteine desulfurase isoform X1 [Citrus sinensis]	--	SubName: Full=Uncharacterized protein {ECO:0000313|EMBL:KDO58332.1};	Uncharacterized conserved protein with similarity to predicted ATPase of the PP-loop superfamily	GO:0003824,catalytic activity	PF00266.19:Aminotransferase class-V
Cs1g05680	38.17	137.24	35.82	20.9	67.25	42.5	1520	5203	1270	790	2525	1611	-0.667648	0.262216	0.430577	false	chr1	5483122	5485859	+	Cs1g05680	--	K11717 cysteine desulfurase / selenocysteine lyase [EC:2.8.1.7 4.4.1.16] | (RefSeq) cysteine desulfurase 1, chloroplastic (A)	ko00450: Selenocompound metabolism	hypothetical protein CICLE_v10000628mg [Citrus clementina]	--	SubName: Full=Uncharacterized protein {ECO:0000313|EMBL:ESR45490.1};	Uncharacterized conserved protein with similarity to predicted ATPase of the PP-loop superfamily	GO:0003824,catalytic activity	PF00266.19:Aminotransferase class-V
Cs1g05690	5.82	6.05	6.7	6.02	5.8	6.89	282	279	289	277	265	318	0.0390525	0.82892	0.899673	false	chr1	5487200	5496457	-	Cs1g05690	--	K03798 cell division protease FtsH [EC:3.4.24.-] | (RefSeq) ATP-dependent zinc metalloprotease FTSH, chloroplastic (A)	--	hypothetical protein CICLE_v10000267mg [Citrus clementina]	RecName: Full=Probable inactive ATP-dependent zinc metalloprotease FTSHI 4, chloroplastic; Short=AtFTSHI4 {ECO:0000303|PubMed:12185496}; AltName: Full=Protein EMBRYO DEFECTIVE 3144 {ECO:0000303|PubMed:21139083}; AltName: Full=Protein FTSH INACTIVE PROTEASE 4 {ECO:0000303|PubMed:12185496}; Flags: Precursor;	SubName: Full=Uncharacterized protein {ECO:0000313|EMBL:ESR45489.1};	AAA+-type ATPase containing the peptidase M41 domain	GO:0009507,chloroplast; GO:0009941,chloroplast envelope; GO:0009535,chloroplast thylakoid membrane; GO:0016021,integral component of membrane; GO:0005739,mitochondrion; GO:0009536,plastid; GO:0005524,ATP binding; GO:0004176,ATP-dependent peptidase activity; GO:0004222,metalloendopeptidase activity; GO:0008237,metallopeptidase activity; GO:0009793,embryo development ending in seed dormancy; GO:000…	PF00004.29:ATPase family associated with various cellular activities (AAA)
Cs1g05700	4.89	5.54	6.2	6.16	5.71	6.05	180	194	203	215	198	212	0.136379	0.486533	0.653054	false	chr1	5499337	5505432	-	Cs1g05700	--	K23280 rhamnogalacturonan I rhamnosyltransferase [EC:2.4.1.351] | (RefSeq) O-fucosyltransferase 34-like (A)	--	hypothetical protein CICLE_v10000858mg [Citrus clementina]	RecName: Full=O-fucosyltransferase 38 {ECO:0000305}; Short=O-FucT-38 {ECO:0000305}; EC=2.4.1.- {ECO:0000305}; AltName: Full=O-fucosyltransferase family protein {ECO:0000312|EMBL:ARJ31455.1};	SubName: Full=Uncharacterized protein {ECO:0000313|EMBL:ESR45488.1};	--	GO:0005737,cytoplasm; GO:0016021,integral component of membrane; GO:0005634,nucleus; GO:0016757,transferase activity, transferring glycosyl groups; GO:0006004,fucose metabolic process; GO:0006486,protein glycosylation	PF10250.9:GDP-fucose protein O-fucosyltransferase
Cs1g05710	0	0	0	17.41	18.39	28.99	0	0	0	285	299	476	10.9306	6.21156e-19	2.97235e-17	up	chr1	5516091	5517368	-	Cs1g05710	--	--	--	PREDICTED: chitinase 2-like [Citrus sinensis]	RecName: Full=Chitinase 2; EC=3.2.1.14; AltName: Full=Tulip bulb chitinase-2; Short=TBC-2;	SubName: Full=Uncharacterized protein {ECO:0000313|EMBL:ESR45487.1};	--	GO:0008061,chitin binding; GO:0004568,chitinase activity; GO:0006032,chitin catabolic process; GO:0000272,polysaccharide catabolic process	PF00704.28:Glycosyl hydrolases family 18
[truncated: 20,410 more rows]

## Sheet: Table S7
Table S7. List of DEGs identified in RN0
ID	RCK(RN15)_1_fpkm	RCK_2_fpkm	RCK_3_fpkm	RD_1_fpkm	RD_2_fpkm	RD_3_fpkm	RCK_1_count	RCK_2_count	RCK_3_count	RD_1_count	RD_2_count	RD_3_count	log2FoldChange	pvalue	padj	regulated	chr	start	end	strand	gene_name	gene_description	KEGG	KEGG pathway	NR	Swissprot	Tremble	KOG	GO	Pfam
[truncated: 3,945 more rows]

## Sheet: Table S8
Table S8. List of enriched GO terms for DEGs identified in RN0
Ontology	ID	Description	GeneRatio	BgRatio	pvalue	p.adjust	geneID	Count	up	down
[truncated: 2,868 more rows]

## Sheet: Table S9
Table S9. List of enriched KEGG for DEGs identified in RN0
[truncated: 128 more rows]
